# Supplementary material for: Explainable AI-driven heterogeneity using coagulation–inflammatory markers improves prognosis prediction, risk stratification, and anticoagulant treatment effects for sepsis
Source: Research Square preprint supplement (doi:10.21203/rs.3.rs-5835917/v1), 2025-02-27
Supplement: Supplementary file 1 [file 4c0a3c8c98cecc48e238b487.xlsx]

## Sheet: MIMIC III
Lactate	pH	Anion Gap	Bicarbonate	Calcium	Chloride	Glucose	Potassium	Sodium	Hematocrit	Hemoglobin	Creatinine	UreaNitogen	Magnesium	Phosphate	PT	aPTT	INR(PT)	Lymphocytes	Monocytes	Neutrophil	White_Blood_Cells	Basophils	Eosinophils	Platelet_Count	AlanineAminotransferase(ALT)	AlkalinePhosphatase	AspirateAminotransferase(AST)	Albumin	Bilirubin	MCH	MCHC	MCV	RDW	Red _Blood_Cells	patients_age	dead
16.7	7.34	37	16	9.4	101	222	3.6	150	46.3	16.7	1.2	12	1.4	4.6	13.6	24.1	1.2	0.8036	0.4428	15.0552	16.4	0.4	0.2	276	16	84	31	4.6	0.7	34.6	36.1	96	14.6	4.84	45	0
15.7	7.23	45	8	10.1	91	132	4.7	139	35	11.4	5.2	37	2.4	7.5	54.9	42.3	5	0.7	0.05	4.15	5	0	0	193	83	214	128	4.2	1.1	30.3	30.9	98	17.4	3.75	80	0
15.4	6.88	24	9	8.2	96	58	4.4	125	33.3	10.4	3.1	27	2.2	8.3	35.8	64.3	3.9	0.02	0	0.1	2	0	4	69	98	72	130	1.1	1.8	38.3	31.2	123	19.4	2.72	54	1
15.3	7.31	25	15	9.5	102	204	4.3	138	23.7	7.5	3.4	55	2	5.5	12.2	63.8	1	0.2419	0.0708	5.5696	5.9	0.1	0.2	139	19	79	34	3.1	0.4	24.2	31.6	77	13.5	3.09	65	0
15.1	6.79	31	7	8.9	101	97	7.1	131	14.8	4.1	4.5	157	3.7	7.9	53.9	79.3	5.4	1.992	3.32	27.888	33.2	0	0	177	109	571	265	1.7	16	30.5	27.9	109	20.3	1.35	55	1
14.6	7.34	28	13	8.7	97	194	4.4	134	19	6.6	1.6	31	2	3	15.1	33.4	1.4	1.1972	0.0451	2.8413	4.1	0.1	0.3	31	43	117	38	3.4	0.4	32.3	34.5	94	15.1	2.03	70	0
14.3	6.9	33	15	8	97	98	5.6	139	44.5	13.9	4.8	30	2.4	11.3	60.9	86.4	6.9	0.8004	0.2088	16.2864	17.4	0.3	0.2	131	6680	144	11820	3.7	8	30.5	31.1	98	14	4.54	40	1
14.3	6.84	46	7	9.4	91	62	6.8	137	50.6	15.4	2.5	102	4.3	10.7	33.6	47.9	3.3	1.178	1.767	47.12	58.9	0	4	81	586	2875	1300	3.2	11.4	28.3	30.5	93	13.9	5.45	64	1
14.3	7.21	36	11	7.1	97	111	4	140	41.6	13.5	3.4	32	1.6	9.5	14.9	32.3	1.5	0.48	0	23.04	24	0	0	494	26	139	44	2.7	2.8	29.5	32.4	91	16.2	4.57	79	0
13.9	7.02	26	12	6.9	103	245	4.2	137	37.5	11.8	2.6	25	2.1	6	25.3	71.2	4.2	0.163	1.304	6.357	16.3	0	0	109	138	85	412	3	10.1	37.4	31.6	118	14.1	3.17	67	0
13.9	7.01	27	15	8.3	96	35	7.2	131	38.8	12.7	3.5	40	2.1	10.7	24.3	40.4	3.9	0.725	0.087	0.841	2.9	0	0	117	102	89	168	1.8	11	38.6	32.7	118	17.4	3.3	61	1
13.9	6.74	32	6	8.4	104	248	7.7	134	33.1	9.6	2.1	34	2.5	7	18.2	85.7	2.3	13.056	1.92	11.52	38.4	0	1	343	15	140	38	2.1	0.4	28.3	29.1	97	19.2	3.41	78	1
13	7.19	29	10	7.3	108	229	6.7	140	45.9	14.9	2.8	44	1.1	3.5	14.9	25.9	1.3	1.717	0.404	2.02	10.1	0	0	765	33	38	82	2.7	1.8	30.7	32.4	95	14.2	4.84	72	0
12.9	7.15	18	22	9.7	100	229	3.9	136	29.5	9.3	2	31	1.7	5.2	17.9	46	1.6	0.564	0.705	8.46	14.1	0	0	64	53	78	120	2.9	0.8	28.7	31.7	91	14.6	3.26	65	0
12.6	7.24	27	15	9.6	109	78	6.7	144	39.6	12.2	0.6	37	1.6	2	21.4	34.8	3.2	0.246	0.738	20.418	24.6	0	0	31	1612	379	1679	2.1	1.9	27.5	30.9	89	16.9	4.44	49	1
12.4	7.33	24	20	8.8	100	180	4.6	139	26.9	8.9	1.5	33	1.9	6.1	31.1	95.1	7.3	0.18	0.81	7.92	9	0	1	174	163	185	342	2.3	4.9	28	33.1	85	21.3	3.18	68	1
12.4	6.4	16	22	7.2	104	183	3.2	139	26.4	8.6	1.8	27	1.5	7.1	16.2	29.8	1.7	0.9492	0.4068	21.1762	22.6	0.2	0	158	11	115	25	2.1	0.3	28.5	32.6	87	15.5	3.02	40	1
12.3	6.98	32	11	5.9	99	80	4.5	137	34.6	11.2	1.9	18	1.7	8.2	30.2	72.5	6	1.265	0.22	2.805	5.5	0	0	64	1719	55	3421	2.5	1.3	29.1	32.2	90	17.3	3.84	48	1
12.3	6.94	39	23	9	101	142	7	137	30.5	10	10.8	108	2.7	12.6	17.8	54.4	1.7	1.67	0.43	7.79	10	0.5	0.5	281	139	723	209	4.1	3.1	29.2	32.8	89	17.3	3.44	78	0
12.2	7.19	47	6	9.2	91	8	5.6	138	27.7	5.3	2.2	23	2.8	10.9	25.3	33	2.6	2.344	1.172	22.561	29.3	1	0	142	85	122	357	3.4	2.6	35.6	31.7	112	22.8	1.5	40	1
12	6.97	29	9	6.4	107	62	5.9	139	30.8	9.9	3.8	86	2.3	11.4	21	38.2	2	0.076	0.048	0.088	0.4	4	4	14	2098	95	3002	1.7	4.5	29.4	32.1	92	14.4	3.37	72	1
11.9	7.55	32	21	7.3	87	146	4.3	136	22	7.2	1.4	31	1.4	3.3	14.7	27.3	1.4	0.306	0.153	14.841	15.3	0	0	119	19	100	58	2.9	3.9	42.1	32.9	128	16.2	1.72	69	0
11.8	7.33	23	14	9.6	108	129	5.5	139	31.7	10.6	1.4	39	4.3	4.8	17.4	49.8	2.1	1.356	1.13	3.277	11.3	0	0	378	47	126	63	2	0.3	29.4	33.5	88	13.8	3.61	64	1
11.8	7.11	25	15	7.7	103	164	3.7	139	41.3	13.4	3.6	42	1.4	5	22.3	47	2.1	0.31	0.31	11.78	15.5	0	0	41	13	116	27	2.5	3.7	30.5	32.5	94	15.1	4.4	68	0
11.6	7.31	32	10	11.6	106	110	6	142	38.5	12.4	2.1	60	3.8	5.7	16.5	32.8	1.8	1.568	1.568	20.776	39.2	0	1	136	258	105	289	3.3	0.9	30.2	32.1	94	13.4	4.08	86	1
11.5	7.16	27	14	9.3	107	171	4.4	144	46.3	14.3	1.6	35	2.9	8.5	14.9	26.7	1.3	1.2978	0.309	18.9314	20.6	0.1	0.1	370	19	126	27	2.8	0.6	27.1	30.9	88	14.9	5.28	85	1
11.2	7.17	40	6	8	83	66	5.7	123	44.4	14.4	6.2	77	2.1	10.7	104.8	150	14.1	2.472	1.442	16.686	20.6	0	0	261	108	319	623	2.8	3.2	30.9	32.4	95	15	4.66	58	1
11.2	7.39	32	18	5.9	83	349	3.6	129	20.9	6.8	1.9	42	1.3	4.8	19.9	28.1	1.8	0.878	1.317	39.071	43.9	0	0	528	64	218	65	2.3	2.6	25.9	32.5	80	16	2.63	53	0
10.9	7.11	32	10	7.6	82	154	4.3	120	43.2	15	3.5	94	1.8	7.4	39.7	71.9	4.1	0.124	0.992	9.424	12.4	0	0	40	49	102	70	2.5	7.1	35.7	34.7	103	14.5	4.2	55	1
10.7	7.24	31	19	7.7	85	18	5.5	129	29.3	9.6	4.3	25	1.4	4.6	23.1	47	3.7	0.348	0.522	4.176	5.8	0	0	87	53	58	194	2.8	8.6	34.1	32.7	104	14.4	2.82	64	1
10.7	7.32	29	11	10	114	563	4.4	150	39.8	12.8	1.9	51	1.8	1.7	14.1	27.2	1.2	0.7685	0.29	13.3835	14.5	0.4	0.1	325	20	87	23	3.8	0.3	33	32.2	102	14.5	3.89	71	0
10.6	7.29	22	14	9.7	85	73	4.5	123	39.4	13.1	4.2	87	2.1	7.3	21.9	50.7	2.1	0.532	1.197	11.039	13.3	0	1	303	112	170	673	2.7	18.5	32.2	33.4	97	17.7	4.08	54	1
10.6	7.24	25	14	9.1	107	100	4.4	142	38.3	12.7	3.2	64	2	4.8	18	36.3	2.1	0.513	0.342	3.762	5.7	0	0	42	47	41	67	2.8	1.7	31.8	33.3	95	14.7	4.01	71	0
10.6	6.78	34	5	7	99	266	7.1	131	30.5	9.4	8.5	66	1.9	9.1	20.9	64.4	2	1.178	0.3348	10.7384	12.4	0.2	1	164	23	72	29	3	0.4	36.4	30.7	119	14.6	2.58	66	1
10.5	7.22	23	14	6.9	102	52	3.9	135	29.4	9.6	0.9	11	1.7	5	21.5	64.7	2.9	0.483	0.161	13.685	16.1	0	0	126	107	176	198	2.2	2.6	29.9	32.6	92	17.3	3.21	65	1
10.5	7.19	23	15	8.3	98	163	4.5	135	47.7	15.9	3.2	55	2.5	3.5	16.4	35.4	1.5	1.084	0.813	19.512	27.1	0	0	306	48	88	117	2.7	0.6	32.2	33.4	97	14.2	4.94	63	0
10.4	7.34	24	15	8.3	101	235	5.2	135	28.8	9.6	1.5	22	1.5	4.2	21.9	57.7	2.1	0.8	0.3	11.3625	12.5	0.2	0.2	184	105	216	301	2.5	3.4	32.7	33.3	98	18.5	2.93	42	0
10.4	7.28	22	18	3.8	106	172	4.7	141	36.2	11.6	2.4	28	1.1	3.3	19.4	40	1.9	2.396	1.797	38.935	59.9	0	0	151	23	120	95	1	0.7	33.3	32.1	104	17.4	3.49	83	1
10.3	7.46	27	20	8.2	98	266	3.3	142	43.9	15.3	1.5	25	1.6	2	13.1	23.6	1.1	0.378	0.378	11.718	12.6	1	0	200	37	48	42	3.1	0.6	29.2	34.8	84	14	5.23	78	0
10.2	7.38	25	13	8.4	110	204	4.3	144	24.6	8.2	0.9	18	1.1	4.6	14	27	1.2	0.535	0.107	9.309	10.7	0	1	260	13	104	16	3.3	0.3	31.2	33.3	94	16.7	2.63	52	1
10.1	7.38	31	21	10	90	44	5.4	137	44.9	13.9	2.2	25	2.6	8	20.6	36.9	1.9	2.1576	0.372	16.0146	18.6	0.2	0	324	103	259	229	2.8	5.3	25.2	30.8	82	16.9	5.49	45	1
10.1	7.23	29	13	7.2	107	190	4.1	145	39.5	13.7	1.8	36	1.2	3.5	14.1	32	1.3	0	0.576	37.44	57.6	0	0	234	25	280	32	2.7	0.4	30.8	34.7	89	14.2	4.45	64	0
10.1	7.37	13	24	9.4	106	120	3.9	139	31.7	10.5	0.5	13	2	3.5	14	48.3	1.3	0.5126	0.143	1.4894	2.2	0.6	1.9	138	15	71	18	3.5	0.3	30.2	33.1	91	14.9	3.48	27	0
10	6.89	13	25	7.2	112	152	3.5	146	48.6	14.7	1.2	31	1.9	5.7	39.5	39.1	4.1	0.729	0.243	20.412	24.3	0	1	413	362	182	878	2	0.5	31.8	30.3	105	13.2	4.62	83	1
10	7.42	13	30	8.3	98	162	3.7	137	31.2	11	0.7	19	1.8	2.4	13.8	26.1	1.2	0.3922	0.1908	9.9746	10.6	0.1	0.3	147	78	104	14	2.4	0.6	29.1	35.3	83	16.7	3.78	73	1
9.9	6.94	25	19	9.6	94	135	5.2	133	28.8	9.5	1.1	33	2	4.4	20.9	40.6	2.9	3.3934	0.329	5.5084	9.4	1	0.9	82	26	180	172	3	1.8	32.4	32.9	98	19.1	2.93	84	1
9.9	7.36	27	13	7.4	93	286	4.9	128	32.3	11.2	1.3	23	2	3.3	12.6	21.9	1	0.3003	0.2002	7.1764	7.7	0.1	0.2	495	203	99	164	2.9	0.2	29.3	34.7	84	14.3	3.83	53	0
9.9	7.07	15	18	7.3	118	105	4.1	147	48.8	16.4	1.7	17	1.4	2.4	17.2	36.3	1.9	4.41	1.96	17.15	24.5	0	0	280	30	85	29	3.8	0.2	30.4	33.7	90	13.1	5.4	43	0
9.8	7.45	22	19	7.4	94	175	4	131	35.9	12.5	1.3	36	2.4	2.5	20.1	38	1.9	0.5656	1.313	8.1305	10.1	0.7	0.3	11	54	138	81	2.1	3.5	30.5	34.7	88	15	4.08	52	1
9.8	7.39	16	26	9.3	103	70	4.2	141	36.4	12.3	2.9	76	2	3.2	13.8	26.1	1.3	0.32	0	0.52	1	0	4	69	36	152	55	3.6	1.4	34	33.9	100	14.2	3.63	80	1
9.7	7.04	25	13	7.4	112	144	4.2	146	35.2	10.5	2.3	45	1.1	4.4	14.7	43.3	1.4	0.159	0.477	10.812	15.9	0	0	170	45	36	83	2.2	0.8	30.5	29.8	103	13.9	3.43	73	1
9.6	7.11	26	11	6.9	108	86	4	141	44.4	14.4	3.1	20	1.1	3.8	27.7	80.6	2.9	0.44	0.11	8.03	11	0	1	81	14	108	36	2.3	0.6	27.8	32.5	86	13.6	5.19	22	0
9.4	7.4	26	16	8.2	93	116	4.4	131	29.2	9.5	2	28	1.4	2.8	15.9	30.1	1.7	0.5221	0.1589	21.9963	22.7	0.1	0.1	402	1076	749	1591	2.7	3.7	26.4	32.6	81	14.1	3.6	83	0
9.4	7.38	24	17	9.1	102	205	7.9	135	41.9	14.3	1.5	31	2.3	2.9	30.5	47.6	3.1	2.1816	0.2484	8.2836	10.8	0.5	0.3	271	44	44	85	2.9	0.8	31.7	34	93	13.1	4.49	77	1
9.4	7.25	24	18	9.3	105	104	4.4	143	39.8	13	3.8	48	1.1	2.3	15.3	29.7	1.4	0.31	0.62	26.97	31	0	0	165	46	59	51	3.3	0.4	29.6	32.8	90	15.2	4.41	64	1
9.4	7.25	19	22	8.9	101	125	4.1	138	42	14.6	1	14	1.9	4.9	15.6	32.1	1.6	2.162	0.4416	6.4308	9.2	0.7	1.1	201	20	128	28	4	0.9	31.3	34.8	90	13.7	4.68	64	1
9.3	7.29	18	22	9.7	101	251	4.6	136	33.8	10.2	1	17	2.1	4.9	21.6	42	2.9	1.273	0.4824	4.6565	6.7	1.1	3.2	227	73	149	112	2.9	1.3	22.5	30.1	75	18.5	4.52	83	1
9.2	7.05	20	15	7.5	95	147	5.9	124	39.5	12.2	3.6	45	2.3	9.8	34.9	48.2	3.6	1.134	1.134	29.484	37.8	0	0	145	3218	389	9170	2.2	7.3	35	32.1	110	15.6	3.46	51	1
9.2	7.33	25	19	7.1	89	300	3.9	129	43.5	14.6	1.3	20	1	2.7	15.5	29.9	1.6	1.313	0.404	6.666	10.1	0	0	163	33	63	48	4.2	1.1	28.9	33.6	86	13.4	5.06	86	1
9.2	7.33	23	21	9.6	104	143	4.5	143	48.2	15.5	1.3	17	2.4	2.6	11.9	25.9	1	4.7613	0.6903	11.7705	17.7	1.6	1.1	350	27	130	27	3.7	0.5	28.3	32.2	88	13.5	5.49	66	0
9.2	7.16	19	17	7.9	112	272	4.1	144	51.5	15.2	2	29	1.8	3.1	14.2	26.5	1.2	0.288	0.096	1.504	3.2	0	2	302	21	126	20	1.8	0.4	26.9	29.6	91	14.5	5.65	83	1
9.1	7.23	29	18	9.5	102	251	6.3	143	26.5	8	3.2	81	2.8	4.6	16.7	32	1.8	5.85	1.17	11.466	23.4	0	0	803	40	107	66	2.3	0.2	28.1	30	94	17.1	2.83	61	0
9.1	7.26	27	19	6.9	92	138	4.7	133	31.7	9.8	5.8	58	1.4	5.8	21.2	33.8	3	0.047	0	0.564	4.7	0	0	229	20	220	34	2.9	0.6	26.4	30.8	86	21.2	3.71	70	1
9.1	7.26	24	19	8.2	95	77	3.2	135	30.2	10	0.9	10	1.6	2.9	16.1	42.2	1.7	0.695	0.139	7.784	13.9	0	1	171	30	575	33	2	2.3	26.2	32.9	80	13.6	3.8	48	0
9.1	7.32	32	15	10	100	483	6.2	141	37.8	12.9	2.6	69	1.9	3.7	14.8	23.7	1.5	0.304	0	26.752	30.4	0	0	363	10	88	31	3.8	0.5	29	34	85	15.4	4.43	64	0
9.1	7.31	25	19	6.8	105	228	4.2	145	45.1	16	1.5	20	1.5	2.7	12.8	23.4	1.1	0.5986	0.3942	13.5342	14.6	0.3	0.3	328	20	98	29	3.2	0.6	36.9	35.4	104	14.2	4.34	66	0
9	7.34	26	15	7.7	86	92	5.6	121	27.8	8.4	5.4	68	1.7	7.2	18.9	60.4	2.4	0.336	1.008	28.56	33.6	0	0	165	412	463	1140	1.9	5.3	23	30.3	76	17.9	3.66	31	1
9	7.22	24	15	9.7	104	148	4.2	139	39.7	12.8	1.6	30	1.6	3	15	27.6	1.4	0.664	0.664	13.612	16.6	1	0	297	59	348	100	3.5	0.4	29.6	32.2	92	14.9	4.32	82	0
9	7.52	25	16	9.9	96	166	3.2	134	37	12.9	3.1	40	1.6	1.2	13.4	28.3	1.2	0.595	0	9.282	11.9	0	0	179	103	349	81	3.6	1.9	30.9	34.7	89	14.1	4.16	56	0
8.9	7.29	28	22	9.7	90	100	5.5	134	29.7	9.1	4.5	93	2.5	7.5	25.5	33.8	2.5	0.792	0.5346	18.4536	19.8	0.1	0.1	212	655	203	824	3	4.3	27.1	30.8	88	19.5	3.37	74	1
8.9	7.3	17	24	8.9	96	191	3.7	133	28	8.2	3.2	31	1.9	3.7	16.4	33.9	1.5	1.2719	0.4582	5.9566	7.9	0.7	1.9	219	9	132	33	2.9	2	25.9	29.4	88	26.4	3.17	60	0
8.9	7.2	25	10	5.7	115	384	3.1	147	26.8	8.4	5.2	31	1.4	6.7	13.4	25.7	1.1	0.6392	0.136	12.7976	13.6	0	0.2	175	17	51	23	2.9	0.3	31.9	31.3	102	15.4	2.63	62	1
8.9	7.44	31	16	9.3	97	163	7.1	137	40.8	12.5	1.1	19	1.7	4.9	14.2	25.6	1.3	2.198	0.616	10.85	14	0.4	2	407	8	52	14	2.1	0.3	30.4	30.6	99	16.1	4.11	72	0
8.8	7.25	15	26	8.7	108	111	4	145	38.5	13	0.9	11	2.2	3.2	12.6	23.4	1	2.392	0.376	5.016	8	0.6	2	450	59	108	35	4	0.2	32	33.8	95	13.9	4.07	56	0
8.8	7.32	15	27	8.9	90	122	3.7	128	28.3	9.6	1	18	1.5	3	10.8	29.8	1	0.0234	0.0819	11.5596	11.7	0.1	0.1	166	17	100	31	2.9	0.4	29.3	34	86	15.4	3.29	58	0
8.8	7.32	25	12	7	105	99	5	137	29.9	9.7	2.8	73	1.9	5.3	11.4	36	1	0.546	0.026	0.663	1.3	0	0	134	9	56	13	2.6	0.9	32.8	32.5	101	15	2.97	79	0
8.6	7.05	24	17	7.9	104	445	4.3	141	26.1	8.9	1.3	20	1.6	5.5	14.9	38.1	1.5	0.675	0.27	10.395	13.5	0	1	175	306	35	273	2.9	0.3	32.1	34.2	94	13.9	2.78	71	0
8.6	7.38	25	18	7.6	98	114	4.5	136	41.2	13.5	2.7	26	1.5	3.5	15.1	32.6	1.4	1.152	0.432	8.496	14.4	0	0	92	252	172	188	3.7	5	31	32.7	95	14.3	4.34	80	0
8.6	7.19	29	15	8.6	92	182	4.7	131	38.6	11.2	3.7	26	1.9	6.5	22.5	150	2.2	1.692	0.282	7.332	9.4	0	0	155	29	277	58	3.8	1.1	30.8	28.9	106	21.2	3.63	52	1
8.6	7.29	22	12	7.1	99	61	5.6	127	30.9	9.5	1.8	22	1.5	5.1	18.7	150	2.3	0.2	0.12	0.84	4	1	1	150	24	163	33	1.1	2	28.7	30.9	93	16.7	3.32	80	1
8.6	7.21	35	8	8.2	97	109	7.5	132	35.1	10.5	1.6	52	3.2	9.4	13.4	24.8	1.1	2.134	1.552	3.298	19.4	0	1	506	18	81	30	1.4	0.4	30.2	29.8	101	16.1	3.46	89	1
8.5	7.27	23	20	8.8	101	111	6.8	137	35.3	12	2.3	49	2.1	3.5	13.6	25.2	1.2	0.24	0	6.4	8	0	0	297	26	144	96	3	0.4	30.1	33.9	89	14.8	3.98	87	0
8.5	7.2	19	16	7	94	110	4.4	125	29.9	9.6	1.3	49	2.1	5.1	30.2	47.1	3	0.495	0.594	15.3285	16.5	0.3	0.1	65	23	63	55	2.1	2.1	25.7	32.2	80	17.4	3.76	48	0
8.4	7.25	25	17	7	97	133	5.3	134	47.5	15.1	1.7	53	1.3	3.1	16.5	58.4	1.9	5.253	0.927	22.557	30.9	1	0	334	71	116	89	2.1	1.1	30.1	31.7	95	15.5	5.01	82	0
8.4	7.11	13	21	6.8	103	84	3.2	134	26.8	8.9	0.4	6	1.1	2	18.8	76.3	2.3	0.8526	0.0348	7.656	8.7	0.2	1.7	409	24	97	27	2.5	0.4	28.3	33	86	14	3.13	35	0
8.3	7.15	20	18	6.1	105	109	3.7	139	29.2	9.8	2.3	37	1.3	2.6	19.2	46.8	1.8	0.108	0.054	4.104	5.4	0	0	71	47	68	71	2.3	0.8	34.1	33.6	101	14.7	2.88	67	1
8.3	7.19	16	27	6.9	97	40	3.2	137	28.5	9.3	0.6	16	1.4	3.6	26.2	44.6	2.5	0.104	0.052	0.364	1.3	2	0	87	19	61	41	2.1	9.8	30.7	32.4	95	19.1	3.01	40	1
8.3	7.46	25	17	9.2	97	263	5.1	134	31.7	10.3	2.9	39	1.9	3.2	14.5	26.7	1.4	0.08	0.08	2.88	4	0	0	227	20	117	34	3.1	0.8	28.5	32.3	88	14.4	3.6	64	1
8.2	7.49	16	23	7.5	109	101	5.1	143	32	10.3	1	4	1.5	3	19.1	42.1	2.4	3.0536	0.5544	5.0688	8.8	0.7	0.8	138	41	236	146	2.1	4.4	31.1	32.3	96	18	3.33	54	0
8.2	7.14	27	20	5.1	88	127	3.6	131	42.6	14.1	4.7	41	1.5	10.3	17.5	30.4	2.1	5.343	1.644	21.372	41.1	0	1	216	18	181	58	1.3	0.4	32.3	33	98	14.1	4.35	75	1
8.1	7.27	27	19	11.4	93	113	7.9	131	58.6	17.9	3.4	59	1.9	6.4	77.1	124.7	41.3	1.685	1.348	27.634	33.7	0	0	264	183	76	307	1.1	0.3	25.8	30.5	85	14.2	6.92	77	1
8.1	7.19	25	20	9.3	106	117	3.8	147	50.5	16.5	3.9	21	1.7	5.2	15.9	35.3	1.6	1.935	0.4515	10.3974	12.9	0.2	0.7	169	19	109	32	4.2	0.5	28.3	32.8	87	14.3	5.84	66	0
8.1	7.23	16	23	8.2	102	189	2.8	138	39.1	13	1.4	11	1.3	3.2	13.4	22.3	1.2	1.9812	0.7332	12.8388	15.6	0.2	0	339	19	97	30	3.4	0.3	35.6	33.3	107	16.3	3.65	68	0
8	6.97	29	7	5.3	105	374	4.5	136	37	12.8	5.2	69	1.8	7.4	25.1	150	2.5	0.213	0.142	2.982	7.1	0	1	70	133	65	296	2	0.4	32.3	34.5	94	14	3.95	64	1
8	7.34	32	20	7.2	89	99	5.8	135	47.9	14.4	8.4	90	2.3	13.6	17.8	32.3	1.6	0.595	0.425	7.225	8.5	1	0	127	87	191	265	2.1	4.8	28.1	30.1	93	22.1	5.13	62	1
8	7.37	25	17	8.4	98	231	4.4	136	22.3	7.3	0.9	11	1.8	4.1	16.3	36.1	1.5	0.66	0.2508	12.2892	13.2	0	0.1	379	35	115	57	2	0.7	38.1	32.9	116	15.4	1.93	54	0
7.9	7.22	37	13	11.5	93	159	4.6	138	39.3	13.8	4	38	1.5	9.8	14	23.6	1.2	1.5456	0.6944	20.0928	22.4	0.2	0.1	267	1437	83	1137	5.6	1.1	31.4	35	90	13.6	4.38	50	0
7.9	7.12	27	9	7.8	111	77	6.7	140	26.6	8.7	4.2	100	3.3	9.1	17.4	39.5	1.6	1.77	1.475	23.895	29.5	0	0	336	200	115	798	2.3	0.5	33.8	32.7	103	13.6	2.57	66	1
7.9	7.13	27	17	9.5	85	108	4.3	125	37.7	12.2	2.2	31	2.1	4.4	27	56.6	2.7	0.762	0.508	8.763	12.7	0	1	245	58	689	117	3.3	13.1	29.7	32.4	92	16.2	4.12	60	1
7.9	7.28	29	15	10.3	94	206	8.5	129	43.5	14.3	3.2	107	2.9	5.9	52.8	33.1	6.3	1.918	0.548	7.261	13.7	0	0	251	32	120	109	3.9	2.8	33.9	32.9	103	19.8	4.22	83	1
7.9	7.35	8	22	7.9	120	156	3.8	146	33.4	9.9	0.8	20	1.7	3.1	18.3	52.7	1.7	1.2141	0.284	5.4741	7.1	0.4	1.4	75	59	161	90	1.7	0.6	34.3	29.8	115	18.3	2.9	83	1
7.9	7.34	22	17	7.5	100	105	5.4	134	45.6	14.9	1	20	1.2	4.2	16.5	27.6	1.5	1.275	0.102	3.315	5.1	0	1	152	32	76	65	2.2	2	32.9	32.8	100	14.1	4.55	81	0
7.9	7.31	30	18	7.9	103	256	4	147	34.9	11.2	3.4	42	2.3	8.1	14.9	32.8	1.3	5.16	0.129	7.611	12.9	0	0	433	26	82	50	2.8	0.4	29.8	32.2	93	16.3	3.77	70	0
7.8	7.14	36	5	7.8	95	86	6.6	129	42.6	15.2	3	95	3	10.5	19.7	34.4	1.8	2.24	1.4	20.72	28	0	0	298	82	74	345	2	0.5	31	35.7	87	14.1	4.91	68	0
7.8	6.98	26	14	7.1	104	270	6.3	138	39	12.1	2.3	23	2.2	9.1	28.1	55.9	2.9	1.4	0.6	17.4	20	1	0	228	133	64	197	2.3	1.6	29.8	31.1	96	13.4	4.06	52	1
7.8	7.34	28	19	8.4	97	310	4	140	42.7	14.7	2	21	1.5	2	14.9	28.6	1.3	1.442	1.854	16.48	20.6	0	0	382	94	95	51	4.4	0.5	30.3	34.4	88	15.3	4.85	37	0
7.8	7.43	26	23	11.6	90	70	9.2	130	46.7	14.8	9.6	34	2.1	5.1	14.9	83.3	1.5	0	0.618	24.411	30.9	0	0	200	17	126	40	3.2	1	30.3	31.7	96	18.2	4.89	30	0
7.8	7.46	23	18	8.9	101	177	4.2	138	29.1	9.7	1.2	27	2.3	3.2	12.1	23.5	1	1.4507	0.3097	13.7246	16.3	0.2	4.7	266	39	169	29	2.9	0.6	30.2	33.3	91	13.8	3.21	66	1
7.8	7.48	21	26	9	91	241	2.5	135	33.5	11.9	0.8	14	1.5	3	14.1	20.8	1.3	0.403	0.026	0.481	1.3	0	0	212	39	248	21	2.9	0.6	30.5	35.4	86	15	3.89	43	1
7.7	7.21	20	21	6.6	104	60	6.3	139	31.8	10.5	1.9	23	1.3	1.9	18.3	28.2	1.7	0.741	0.095	0.798	1.9	0	0	138	48	74	159	3.1	7.5	32.3	33	98	14.9	3.25	62	1
7.7	6.89	20	9	8.1	109	98	3.7	134	25.8	8.2	2.5	70	1.9	3.4	25.7	52.7	2.5	0.558	0.036	0.144	0.9	0	0	128	17	48	77	1	1	35.1	31.8	111	23.7	2.33	80	1
7.7	7.4	21	15	7.7	101	183	3.6	133	23.8	7.1	2.5	34	1	1	13.3	40	1.1	0.126	0.063	5.67	6.3	0	0	213	44	461	46	3.1	0.6	27.2	29.9	91	18.7	2.62	40	0
7.6	7.34	22	23	8.3	101	126	6.3	140	35.5	11.1	3.9	59	2	6.9	49.2	33.9	5.6	1.035	0.483	9.9705	11.5	0	0.1	197	412	103	1161	2.6	1.5	33.9	31.4	108	19.5	3.29	70	0
7.6	7.3	19	24	7.5	107	116	4.2	146	38.6	12.8	1.9	35	1.5	2.3	15.2	28.2	1.4	0.465	0.279	6.324	9.3	0	1	131	258	178	315	2.5	0.3	27.7	33.2	83	17.2	4.64	80	0
7.6	7.36	21	21	7.6	98	211	3	137	26.4	9.1	1.1	36	1.7	2.5	16.3	47.1	1.4	0.544	0	12.92	13.6	0	0	86	20	753	33	2.1	0.7	32.6	34.4	95	17.2	2.79	53	1
7.6	7.32	26	18	10.9	99	94	5.2	138	34.2	11.6	2	24	1.5	2.6	13	27.5	1.1	1.3671	0.5642	19.6602	21.7	0.4	0.1	428	12	84	28	2.6	0.7	30.6	33.9	90	15.3	3.79	80	0
7.5	7.35	21	18	8.9	99	155	3.4	135	37.3	12.2	1.2	14	2.1	1.1	14.2	40	1.3	0.404	0.404	18.18	20.2	0	0	165	200	163	145	3.9	5.3	28.8	32.7	88	15	4.23	79	0
7.5	7.25	21	23	7.6	95	163	4	135	42.2	13.9	2.8	45	1.9	4.2	13.5	27.2	1.2	1.116	1.488	9.486	18.6	0	0	329	37	66	46	3.7	0.6	29.5	33	89	14.2	4.72	64	0
7.5	7.06	29	15	6.7	95	253	6	133	39.3	13.5	3.8	140	1.8	6.5	11.1	20.7	0.9	0.205	0.697	0.738	4.1	1	7	255	27	82	19	3.2	0.3	34	34.3	99	18.6	3.97	62	1
7.5	7.46	20	26	9.2	101	362	3.4	144	40.3	13.7	1.6	42	2.4	3	13	26.7	1.1	1.547	1.428	7.021	11.9	0	0	194	18	59	17	2.2	0.5	29.4	33.9	87	14.1	4.64	87	1
7.4	7.44	21	31	10.1	94	103	4.5	141	35.9	11.8	10	56	1.7	5.3	13.9	21.2	1.2	0.795	0.265	3.657	5.3	0	0	75	143	178	105	3.5	12.7	33	33	100	15.6	3.59	55	0
7.4	7.35	23	21	9.9	109	363	4.1	149	46.2	15.6	1.7	29	2	2.3	14.8	24.8	1.3	2.037	0.525	7.854	10.5	0.5	0.3	361	24	79	28	2.5	0.7	32.6	33.8	96	13.2	4.79	77	0
7.3	7.15	24	17	8.2	98	206	4	135	31.6	10.8	3.5	42	1.2	2.7	12.9	26.8	1.1	0.388	0	12.998	19.4	0	0	265	269	176	317	3	2.4	28.7	34	84	14.4	3.75	68	0
7.3	7.5	26	26	9.9	94	142	5.6	140	27.7	8.5	5.3	39	1.9	5.5	45.4	38.7	5.1	1.0164	0.3146	10.6843	12.1	0.1	0.6	252	59	92	57	2.9	0.6	24.5	30.6	80	19.2	3.45	65	0
7.2	7.34	22	23	7.1	96	97	4.4	137	44.1	15.4	1.8	23	1.3	3.2	13.5	20.4	1.2	0.55	0.55	21.175	27.5	0	0	351	334	198	204	2.3	2.6	31.3	35	90	12.1	4.92	58	0
7.2	7.28	20	23	11.6	98	135	3	138	23.5	9	1.4	13	1.6	0.3	12.4	21.1	1.2	6.546	0	0	109.1	0	0	13	24	174	114	3.6	6.9	30.2	38.3	79	15.9	2.98	35	1
7.2	7.39	22	30	8.6	98	82	3.9	146	50.2	14.6	2.2	13	1.4	2	15.3	129.5	1.3	0.185	0.1776	6.956	7.4	0.3	0.8	121	16	161	45	2.9	0.9	27.3	29.2	93	18.3	5.37	83	0
7.2	7.34	23	22	8.5	93	323	4.7	133	36.6	11.5	0.9	26	1.7	2.3	21.8	32.4	2	1.248	0.2808	6.2322	7.8	0.3	0.2	293	52	135	44	3.9	1.6	26.9	31.4	86	18.7	4.28	72	0
7.2	7.35	24	23	8.9	100	213	3.7	143	38.1	12.7	1.5	48	2	4.3	13.1	36.7	1.1	0.492	0	5.576	8.2	0	0	224	30	78	31	2.9	0.3	30.6	33.3	92	13.3	4.14	64	1
7.1	7.21	20	20	8.7	113	145	5.2	148	27.4	7.9	2.5	47	2.2	6.5	19.8	44.8	1.8	1.05	0.3	13.5	15	0	0	365	200	109	513	2.1	0.3	26.1	28.7	91	17.7	3.01	64	1
7.1	7.26	22	19	7.6	100	127	4.5	136	42.4	13.6	1.1	47	1.9	5.8	22.3	31.9	2.1	0.78	0.06	1.5	3	0	0	41	295	219	397	2.9	22.5	26.6	32.2	83	27.4	5.12	31	1
7.1	7.23	19	15	8	107	79	8.8	132	27.1	9.4	2.8	31	1.7	3.6	25.1	44.3	2.5	0.693	0.33	1.65	3.3	0	0	78	36	137	140	3	8	39.7	34.6	115	21.8	2.36	53	1
7.1	7.33	22	22	9.5	95	275	3.6	135	33.2	11.5	2.7	37	1.5	1.6	13.8	28.8	1.3	0.392	0.196	18.62	19.6	0	0	185	17	93	42	3.9	0.9	32.6	34.8	94	12.6	3.54	76	0
7.1	7.49	21	25	7.9	91	600	3.8	133	37.2	12.7	1.4	18	1.8	2.1	14.5	19.8	1.3	0.4674	0.3813	11.4144	12.3	0.1	0.1	192	29	107	32	4.1	0.6	30.5	34.2	89	14	4.17	70	0
7.1	7.33	21	24	7.2	91	150	3.8	132	36.8	12.8	1.8	18	1.5	5.3	13.4	24.9	1.1	0.21	0.189	1.533	2.1	0	0	143	74	98	28	2.6	1.2	33.2	34.7	96	14.4	3.84	42	0
7.1	7.42	23	22	7.3	92	118	3.9	133	35.9	11.6	1.3	13	0.8	1.8	19.8	28.4	1.9	0.425	0.85	30.6	42.5	0	0	699	22	92	22	3.7	1.2	26.5	32.3	82	17	4.38	31	0
7.1	7.2	27	17	8.4	99	189	6.1	137	42.8	14.1	2.7	56	1	4.4	14.5	38	1.4	1.43	0.39	2.21	6.5	0	0	555	14	131	21	2.4	0.6	30.1	32.8	92	14.5	4.68	32	0
7	7.46	24	17	8.7	82	391	6	128	35.1	11.1	8.9	65	2.2	9.1	17.7	31.8	2.1	0.3312	0.3933	19.7271	20.7	0.2	1	186	1050	399	1674	3.7	1	31.8	31.6	101	15.4	3.49	60	0
7	7.24	19	15	8.3	107	62	4.1	137	41.5	13.1	2	27	1.6	4.3	20	45.7	1.9	0.063	0.021	0.329	0.7	0	0	25	56	94	118	2.4	6.3	35.9	31.7	113	17.4	3.66	61	1
7	6.98	26	19	11.6	100	376	5.5	139	40.8	12.2	8.8	92	1.8	9.3	13.2	29.5	1.1	4.3884	0.1518	8.9562	13.8	0.2	1.9	278	73	149	112	2.9	1.3	30.8	29.9	103	15.8	3.96	55	0
7	7.34	32	16	9.5	80	172	3.7	124	34.1	12.1	3.1	59	2.7	3.8	12.5	23.7	1	1.891	0.732	2.867	6.1	0	0	453	28	136	63	2.8	0.3	31.9	35.5	90	14.2	3.8	41	0
7	7.31	20	24	8.7	99	92	4.3	139	32.7	9.4	4.6	33	1.7	2.9	13.9	24.2	1.3	1.15	0.23	21.62	23	0	0	223	28	253	42	2.9	0.6	27.1	28.7	95	17.6	3.45	59	1
7	7.44	16	28	8.2	97	99	4.9	136	22.7	7.5	1.4	34	2.2	4.6	11.7	24.2	1	0.7942	0.2926	2.2344	3.8	1.1	11.5	370	35	799	40	2.7	2.3	30.8	32.9	94	15.9	2.42	70	0
6.9	7.36	30	15	7.4	96	124	4.3	137	33.7	10.5	1.2	37	2.1	3.3	20.4	28.6	2	2.5728	0.9984	15.5712	19.2	0	0.2	245	109	59	212	2.8	1.5	20.4	31.2	65	21.4	5.15	61	0
6.9	7.34	23	21	8.3	101	149	4.9	140	40	13.2	1.4	44	2.1	3.3	14.6	18.8	1.4	0.675	0.585	7.677	9	0.4	0.4	242	302	98	201	3.7	0.7	25.5	33.1	77	15.4	5.2	69	1
6.9	7.22	24	20	5.6	99	325	3	140	41.5	14.6	0.9	13	1.2	4	14.9	44.3	1.4	0.435	0.02	0.035	0.5	0	0	204	45	95	143	1.7	0.8	31.4	35.2	89	12.3	4.65	57	1
6.9	7.35	23	19	6.8	99	274	3.5	137	44.4	14.7	0.8	12	1	1.1	13.1	20.3	1.1	0.2	0	7.8	10	0	0	256	36	51	29	2.9	0.4	30.5	33.2	92	14.5	4.84	84	0
6.8	7.44	28	22	9.5	87	209	7.6	129	64.1	21.7	1.4	55	2.1	5.6	22.8	40.6	2.1	0.4094	0.5251	7.9032	8.9	0.4	0.3	48	373	256	397	3	17.8	37.5	33.8	111	16.6	5.77	51	1
6.8	7.36	25	16	9.5	93	524	4.2	130	34.5	11.4	1.9	40	1.7	4.1	16.6	28.3	1.9	0.564	0.564	7.144	9.4	0	0	142	71	74	80	2.6	3.6	34.4	32.9	105	12	3.3	54	0
6.8	7.42	21	22	9.8	110	480	4.4	149	44.7	14.9	1.7	79	2.9	2.5	14.4	23.1	1.4	1.4	0.4	5.2	10	0	0	328	33	126	74	3.3	0.4	32.3	33.5	97	12.4	4.61	78	0
6.8	7.22	21	21	9.1	104	55	4.7	141	39.7	13	1.5	22	1.4	2	13.3	21.4	1.2	1.325	0.689	1.431	5.3	0	4	262	20	51	44	3.5	0.4	32.1	32.8	98	16	4.05	77	0
6.8	7.18	26	16	7.7	92	203	3.3	131	30.8	9.5	7.8	38	1.2	4.5	11	42	1	0	0.303	6.767	10.1	0	0	338	30	93	35	2.9	0.1	30.2	31	98	15.1	3.16	62	1
6.7	7.3	30	15	6.8	88	69	4.7	128	37	13.2	5.9	68	1.8	4.4	18.5	37.8	1.7	0.973	0.695	11.259	13.9	0	1	250	281	89	723	2.6	2	29.8	35.7	84	14.2	4.43	52	0
6.7	7.34	17	18	9.3	100	101	4.5	130	30.7	9.2	2.5	27	1.7	4.7	26.8	44.8	2.6	0.042	0.126	1.407	2.1	0	0	58	71	122	203	1.5	4	34.9	30	116	17.1	2.64	72	1
6.7	7.09	15	21	7.3	110	79	3	143	35.3	11.8	0.9	13	1.8	3.3	20.9	41.6	1.9	0.756	0.84	6.468	8.4	0	0	103	40	76	125	2.3	3.2	34.1	33.3	102	15.4	3.45	42	0
6.7	7.21	19	10	7.3	117	113	4	142	27.1	9	2.3	31	1.2	1.2	14.7	29	1.4	1.488	0	6.696	9.3	0	0	77	40	76	75	2.9	0.2	32	33.3	96	13.4	2.83	79	0
6.7	7.27	25	12	8.7	114	141	6.1	145	35.7	12.2	3	75	2.1	4.2	12.7	30	1.1	2.466	1.096	8.357	13.7	0	0	240	14	32	17	2.3	0.2	31.7	34.2	93	14.8	3.85	64	1
6.7	7.37	24	21	7.9	92	272	5.6	131	36.8	11.5	0.9	30	1.6	4.4	13.7	28.7	1.3	0.315	0.63	27.09	31.5	0	0	554	13	131	13	2.9	0.3	25.2	31.1	81	17.2	4.55	61	1
6.6	7.27	20	23	10.2	99	234	4	138	35.1	12.1	1.2	33	1.8	3.7	12.1	18.6	1	1.6536	0.5148	13.26	15.6	0.3	0.8	380	133	129	263	4.8	1.8	28.6	34.5	83	13.8	4.24	67	0
6.6	7.34	22	16	9.7	106	70	4.8	139	33.9	10.8	1.3	12	2.3	4.6	22.9	48.4	2.2	0.72	0.63	7.47	9	1	0	214	148	109	101	2.3	5.7	24.8	31.9	78	18.7	4.36	45	0
6.6	7.42	20	21	6.7	93	66	4.4	130	41.3	13.8	1.5	25	0.7	2.7	17.2	37.5	1.9	1.232	0.028	0.588	2.8	0	0	157	28	37	77	2.6	0.8	28.9	33.5	86	13.1	4.78	45	0
6.6	7.42	23	20	9.2	103	120	5.1	141	39.6	13.1	1.6	34	1.6	2.3	15.4	34.5	1.5	0	0.131	11.266	13.1	0	0	142	21	73	56	3.6	1	27.4	33	83	14.2	4.77	88	0
6.6	7.23	23	19	6.8	88	50	4.8	125	26.4	9.3	1.4	31	1.5	3.9	14.6	64.3	1.3	0.199	1.393	8.358	19.9	0	0	65	30	87	36	2.3	0.5	31.3	35.3	89	14.6	2.97	76	0
6.6	7.3	21	26	8.2	102	178	3.8	145	40.2	13.1	1	17	1.5	2.8	24.4	30.8	3.9	0.6344	0.0182	1.9162	2.6	0.4	0.8	258	26	167	35	4	0.4	30.9	32.4	95	12.6	4.23	82	0
6.6	7.25	28	15	9.6	106	109	5.5	143	52.1	16.3	1.9	42	2	4.4	14.1	34.8	1.3	1.3442	0.2145	12.727	14.3	0.1	0.1	365	14	128	20	4.4	0.3	30.9	31.2	99	12.9	5.27	64	0
6.5	7.36	21	25	6.7	86	98	6.1	126	41.9	13.8	1.2	47	2.6	3.7	18.1	49.2	2.2	1.314	1.752	17.52	21.9	0	0	282	263	233	563	2.6	4.8	28	32.8	85	15.1	4.92	38	1
6.5	7.04	15	18	8.4	108	136	4.2	137	31.9	10.9	3	46	2.8	4.3	14.2	25.3	1.3	2.1209	0.508	9.5758	12.7	0.3	3.6	537	144	504	139	1.9	0.3	29.8	34.1	87	17.8	3.65	62	0
6.5	7.03	13	28	7.9	93	113	3.4	131	31.6	10.8	0.2	13	1.5	3.8	13.2	34.4	1.2	0.142	0	5.254	7.1	0	0	413	107	265	110	3.1	0.2	30	34.2	88	15.3	3.6	50	0
6.5	7.33	24	18	8.4	101	245	4.4	139	36	12.3	1.1	24	1.4	3.5	12.7	30	1.1	2.394	0.432	15.012	18	0.4	0.4	301	46	118	58	1	1.2	31.5	34.3	92	13.9	3.92	64	0
6.5	7.2	28	15	4.8	104	110	5.1	142	40.2	14.1	4.2	47	0.3	3.6	14.5	22.5	1.3	2.28	0.555	11.94	15	0.7	0.8	267	20	97	35	4	0.4	28	35.1	80	17.4	5.04	68	0
6.5	7.64	19	24	6.4	110	116	3.3	150	26.6	8.5	2.9	24	1.8	4	13.8	35.7	1.3	1.441	0.524	9.563	13.1	0	0	361	53	165	22	1.3	0.5	30.3	32.2	94	18.7	2.82	84	1
6.4	7.3	20	14	9.6	113	78	5.2	142	32.3	10.1	1.3	41	1.8	3.2	14.7	30.8	1.4	0.306	0	1.206	1.8	0	0	149	43	226	123	2.9	1.6	30.9	31.4	98	16.3	3.29	64	1
6.4	7.47	23	23	9.3	104	269	5	145	34.4	11.4	1.1	35	1.7	1.9	12.9	27.2	1.1	0.8712	0.2508	11.9592	13.2	0.5	0.3	384	28	146	54	4.1	0.2	32.3	33.3	97	15.1	3.54	71	0
6.4	7.39	23	17	9.6	103	130	5.4	138	41.8	13.8	1.9	37	2.6	4.7	16.1	30.9	1.5	1.0922	0.3612	7.0262	8.6	0.9	0.5	134	57	126	53	2.9	1.3	33	33	100	14.8	4.19	84	1
6.4	7.24	20	13	6.6	108	70	4.8	136	22.1	6.7	1.4	47	1.6	3.9	25.1	51.3	2.4	1.2	0.42	13.29	15	0.3	0.3	169	16	1086	44	1.8	2.5	29.6	30.4	97	18.5	2.27	76	1
6.4	7.2	26	11	8.4	107	86	5.4	139	37.7	11.4	1.7	36	2.3	6.2	17.3	90.6	2	3.0498	0.3876	6.2424	10.2	0.7	4.4	212	10	93	25	3.6	0.6	26.6	30.2	88	16.1	4.29	83	0
6.4	7.35	17	23	7.9	107	164	3.7	143	39.8	12.9	7.5	31	1.6	1.3	12.9	29.6	1.1	1.79	1.432	14.141	17.9	0	1	235	8	80	15	2.9	0.3	29.2	32.4	90	15.9	4.42	60	0
6.4	7.35	24	17	8	102	144	4.1	139	27	8.1	1.6	23	2.1	5.7	16	49.9	1.4	0.972	1.62	26.568	32.4	0	0	680	11	149	13	2.9	0.4	25	29.9	84	17.4	3.22	66	0
6.3	7.21	22	20	8.1	110	77	3.2	149	33.7	11.5	2.1	42	1.6	4.8	15.3	36.5	1.5	1.624	0.058	0.232	5.8	0	0	209	880	53	1154	2.7	0.9	31.2	34.2	91	12.4	3.69	87	1
6.3	7.22	24	21	7.7	92	176	4.4	133	42.6	13.3	4.8	36	3.1	5	129.1	44.3	18.2	0.8928	0.2592	8.4096	9.6	0.3	0.1	509	450	957	496	4.1	0.8	32.1	31.2	103	16	4.14	63	0
6.3	7.35	15	19	8	101	136	3	132	38.7	12.7	1.1	37	1.6	3	17.4	40.3	1.6	0.36	0.072	5.184	7.2	0	0	83	46	33	112	2.7	2.3	31.6	32.8	97	15.3	4.01	57	0
6.3	7.13	25	18	9.1	93	161	8.6	127	28	9.2	3.6	118	3.1	4.5	12.7	23.2	1.1	0.603	0.201	19.095	20.1	0	0	315	20	196	105	3.4	0.4	27.3	32.7	83	18.4	3.36	64	0
6.3	7.34	19	15	9.1	96	213	4.5	125	13.5	4.7	2	67	1.5	4	22.3	64.6	3.3	0.352	0.022	0.704	1.1	2	0	15	44	127	66	2.1	23.2	29.9	35.2	85	17.2	1.59	56	1
6.3	7.4	21	24	7.1	101	144	4.2	142	37.4	12.2	4.3	49	1.2	3.3	12.8	27	1.1	0.968	0.121	7.623	12.1	0	0	248	20	65	51	3.5	0.7	27.2	32.5	84	15.1	4.47	64	0
6.3	7.4	28	25	10.4	75	258	6.2	122	31	10.5	3.6	68	2.1	5.2	21.1	36.8	2.8	1.3032	0.7964	15.8194	18.1	0.4	0.7	345	15	106	22	4.4	1.8	28.3	34	83	17.5	3.73	80	0
6.3	7.27	25	15	8.9	97	601	8.5	128	43.2	14.3	2.8	55	1.6	1.7	20.6	32	2	1.072	1.072	16.08	26.8	0	0	297	25	63	16	2.9	0.4	29.9	33	91	13.3	4.77	72	0
6.3	7.34	20	18	8.5	102	99	4.9	135	30.7	8.1	0.6	10	2.3	3.2	15.6	32.8	1.4	1.0197	0.0824	9.167	10.3	0.1	0.3	914	6	88	15	1.9	0.4	16.2	26.3	62	17.5	4.98	44	0
6.3	7.36	21	26	9.1	107	574	4.9	149	33	10.3	1.8	58	2	4.5	13.5	22.2	1.2	1.024	0.272	14.672	16	0	0.1	200	11	87	14	3	0.2	29.8	31.3	95	16.8	3.47	76	0
6.3	7.47	20	25	9	104	219	5.3	144	37.5	12	1.3	42	1.9	3.1	13.3	27.6	1.1	2.5232	0.3984	5.2622	8.3	1.1	0.4	268	12	53	12	2.9	0.2	30.9	32	96	15.2	3.9	71	0
6.2	7.47	18	20	9.2	95	105	7.5	125	33.4	10.7	1.6	37	1.7	2.5	18.2	34	2.2	0.868	1.736	17.36	21.7	0	0	187	70	123	119	2.1	3.4	28.3	32.1	88	20.1	3.78	56	1
6.2	7.45	22	31	11.7	83	201	4.4	132	38.3	12.5	2.5	35	2.4	3.5	11.9	22.5	1	0.4845	0.2185	8.7115	9.5	0.4	0.4	236	73	149	112	4.6	1.3	29.4	32.6	90	20.9	4.25	52	1
6.2	7.43	17	23	8.6	93	228	4.2	129	39.8	13.5	1	19	2.2	2.3	10.9	24.7	0.9	0.296	1.776	20.72	29.6	0	0	365	63	59	71	2.9	0.2	32.4	33.9	96	14	4.16	63	0
6.2	7.48	15	20	6.9	112	105	4	143	20.6	7.3	1.3	35	1.7	5.2	13.2	32.9	1.1	0.12	0.09	2.61	3	0	0	30	39	434	36	2.1	1.7	30.7	35.5	87	16.4	2.38	45	0
6.2	7.27	17	18	6.8	95	159	3.1	127	28.3	9.3	0.8	28	1.1	3.6	14.6	36.9	1.4	0.682	0.22	0.44	2.2	0	1	33	26	120	27	2.1	0.8	30.7	33	93	19.2	3.04	51	1
6.2	7.3	18	19	9.3	107	234	5.7	138	27.7	8.9	2.9	55	2.1	3.5	14	23.6	1.3	1.8699	0.4968	4.4229	6.9	0.7	0.9	204	26	146	21	3.9	0.8	27.1	32.1	84	17.7	3.28	67	0
6.2	7.38	15	15	7.7	108	152	3.8	134	29	8.3	0.4	9	1.7	2.4	16.2	71.6	1.4	1.2834	0.4416	11.9784	13.8	0.5	0.3	515	7	122	16	1.6	0.3	20.9	28.7	73	21.3	3.98	47	1
6.2	7.39	22	29	8.8	93	123	4.5	139	36.5	10.8	4	22	1.3	2.9	14.9	35.6	1.4	0.4392	0.2196	17.4033	18.3	0.1	1.2	176	13	171	15	2.9	1.8	24.8	29.5	84	21.5	4.34	48	0
6.1	7.28	21	22	8.3	107	332	4.8	145	35.7	11.2	3.7	93	2.3	4.5	12.8	32.7	1.1	0.702	0.026	0.962	2.6	0	0	116	74	59	109	2.3	0.2	29.7	31.4	95	17.1	3.77	75	0
6.1	7.34	20	19	6.8	104	86	5.4	138	40	9.5	2.4	45	1.7	2.6	37.9	32.3	3.9	0.274	0.068	1.614	2	0.9	1.3	138	41	102	87	2.9	1.1	30.5	31.4	97	16.3	3.11	84	1
6.1	7.32	11	14	5.2	124	196	3.5	145	44	14.8	1.2	25	1.1	4.2	14.2	36	1.3	1.8942	1.7094	19.3809	23.1	0.3	0.2	250	24	40	53	2.2	0.9	30.7	33.6	92	12.6	4.81	68	0
6.1	7.26	24	12	8.5	108	169	5.9	138	34.7	11.6	3.5	64	1.6	4.4	17.7	25.9	2.1	0.85	0.05	3.65	5	0	0	280	30	179	45	2.7	1	29.4	33.4	88	18.7	3.95	60	0
6.1	7.25	20	24	6.5	98	536	4.6	137	38.5	12.8	1.4	24	1.1	0.6	12.6	26.1	1.1	2.064	1.032	13.76	17.2	0	0	378	17	100	20	4.5	0.4	28.3	33.2	85	13.3	4.51	58	0
6	7.34	15	23	7.2	103	117	3.8	137	32.3	11.4	2.3	23	1.4	2.1	13.9	25.3	1.2	0.481	0.222	1.702	3.7	0	0	145	319	154	491	3.3	4	28.9	35.3	82	14.7	3.94	45	0
6	7.37	22	18	8.2	100	136	5.6	134	40.4	13.4	2.8	55	2.5	5.3	21	46.9	2	0.7979	0.1343	6.9362	7.9	0.1	0.2	215	49	133	118	2.9	1.9	31.5	33.1	95	20.5	4.25	64	1
6	7.34	23	19	7.9	98	116	5.8	134	31.2	10.9	3.1	61	2.1	2.9	54.3	49.7	6.5	0.958	2.395	43.11	47.9	0	0	300	24	89	31	2.5	0.4	30.9	34.9	89	15.3	3.52	87	0
6	7.44	24	21	8.7	105	273	4.8	145	36.2	11.6	2.1	37	2.8	3.5	16.2	34.2	1.5	1.195	1.434	14.818	23.9	0	1	895	7	74	22	2.5	0.4	29.7	32.1	93	14.5	3.91	73	0
6	7.34	22	24	8.3	101	139	5	142	32.2	10	1.6	35	1.8	2.8	16.2	23.6	1.4	0.9928	0.584	12.9794	14.6	0.2	0.1	180	17	76	16	2.7	0.3	25	31	81	14.4	4	84	0
5.9	7.34	37	23	10.7	86	62	7.1	139	34.7	11.5	14.8	90	2.8	11.2	23.1	29.9	2.3	1.974	0.938	10.906	14	1.1	0.2	286	1122	156	1469	4	1.5	32.5	33.2	98	14.6	3.54	44	0
5.9	7.36	16	20	7.7	98	162	4.7	129	33.4	11.3	0.9	22	2.1	4.2	16.8	30.2	1.5	0.7018	0.3993	10.9747	12.1	0.1	0	265	269	146	175	3.5	0.6	29.9	33.8	88	15.6	3.78	64	0
5.9	7.13	22	17	7.8	103	127	4.3	138	38.7	13.2	3.5	58	1.5	6.1	14.6	33.9	1.3	2.289	1.199	3.924	10.9	0	0	177	73	39	100	3.1	0.9	32	34.2	94	14	4.13	64	0
5.9	7.38	13	22	8.3	110	160	3.2	142	34.1	11.9	1.4	34	1.6	2.5	17.2	33.9	1.6	1.3752	0.2865	17.381	19.1	0.2	0.1	113	38	100	77	3.2	0.6	32.3	35	92	15.1	3.7	84	0
5.9	7.35	24	21	9.6	94	297	5.7	133	36.8	12.7	1.7	41	2.3	3	12.8	27.4	1.1	0.285	0.57	6.935	9.5	0	0	210	23	69	42	3.1	0.6	32.8	34.5	95	13.5	3.88	77	0
5.9	7.28	15	25	8.4	96	92	2.8	133	26.5	9.5	2.2	16	1.1	1.1	17.3	30.4	1.6	0.393	0.524	10.873	13.1	0	0	169	29	108	38	3.3	0.3	32.3	36	90	16	2.95	65	0
5.9	7.4	18	23	9.8	101	140	4.4	138	33.6	11.5	1.4	47	1.9	3.6	12.1	24.9	1	0.408	0	4.964	6.8	1	0	293	12	90	25	2.6	0.4	27.5	34.3	80	14.2	4.2	76	0
5.9	7.39	22	17	7.8	97	337	4.4	132	28.4	9.7	2	26	1.5	2	13.5	26.3	1.2	0.459	0.135	8.19	9	0.2	2.1	220	36	59	24	3	0.2	28.6	34.2	84	14.1	3.4	52	0
5.9	7.28	19	15	6.2	111	185	3.7	141	26.8	8.8	0.7	20	1	2.1	16.8	31.7	1.6	0.98	0.196	13.328	19.6	0	0	325	9	34	14	2	0.2	30.8	32.8	94	14.8	2.85	87	1
5.9	7.45	17	31	7.7	96	179	3.4	141	31	10.1	1.4	50	2.2	2.5	14.1	25.4	1.3	0.588	0.196	13.72	19.6	0	0	392	6	95	12	3.1	0.5	30.5	32.5	94	14.2	3.3	76	0
5.8	7.16	17	27	7.6	103	141	5.3	142	62.7	19.8	1.5	33	2.3	8.7	17.5	32	1.6	1.6284	0.9027	15.1158	17.7	0.2	0.1	197	2920	93	3330	3.8	2.1	30.1	31.6	95	15.2	6.59	63	1
5.8	7.24	19	26	7.2	93	131	6.9	131	39.9	13	1	13	1.4	1.9	23.6	60	2.3	1.3193	0.501	14.7461	16.7	0.2	0.6	287	73	149	112	3.3	1.3	30.3	32.6	93	15.5	4.3	50	0
5.8	7.29	14	23	8.5	100	135	3.4	134	28.9	10.2	0.8	15	1.9	3.3	18.1	40.2	1.6	0.6468	0.2394	3.2466	4.2	0.2	1.4	37	51	278	89	1.8	3.9	35.1	35.2	100	16	2.9	57	0
5.8	7.19	21	21	9.1	98	227	6	134	30	10	2.1	56	2.4	5.7	14.9	21.9	1.3	0.8712	0.156	1.3488	2.4	0.6	0.3	310	14	85	54	2.6	0.7	26.9	33.4	80	17.2	3.73	85	0
5.8	7.39	7	24	6.6	109	104	3.5	136	31.2	11.5	2	22	1.2	2.9	13.8	150	1.2	0	0.17	14.62	17	0	0	190	19	73	39	2.5	1.4	30.2	36.8	82	16.2	3.8	48	1
5.8	7.38	24	19	9.7	101	291	3.2	141	43.4	13.9	1.7	33	1.8	2.6	11.9	24.8	1.1	1.0585	0.203	12.6875	14.5	0.3	3.5	295	26	101	35	4	0.6	31.2	32.1	97	14.5	4.46	87	0
5.8	7.29	28	12	9.9	102	203	4.2	138	36.9	11.9	1.1	18	2.5	6.6	15.6	29.2	1.7	3.3136	0.6688	26.1136	30.4	0.6	0.3	253	32	2188	35	2.9	7.8	32.8	32.1	102	20.1	3.62	60	1
5.8	7.18	18	29	9.3	99	153	4.2	142	39.2	12.4	1.7	44	1.6	2.8	13.9	25.8	1.3	0.603	1.206	42.21	60.3	0	0	437	22	304	33	1.8	0.3	30.9	31.6	98	15.9	4.01	75	1
5.8	7.51	9	41	7.8	69	124	1.8	128	39.9	13.8	0.8	17	1.7	2.2	13.4	30.7	1.2	0.201	0.134	5.427	6.7	0	0	216	12	65	28	2.9	0.5	27.5	34.7	79	14.5	5.03	20	0
5.8	7.27	27	13	9.1	103	125	4.4	139	45.4	15.1	1.3	30	1.8	4.8	14.1	93.8	1.3	0.744	0.372	6.138	9.3	0	0	409	18	162	26	2.8	0.9	33.5	33.3	101	14.9	4.5	64	1
5.8	7.44	21	22	10.4	102	240	3.1	142	39.7	13.5	3.1	29	1.5	1.4	16.3	30.1	1.5	0.816	0.096	2.784	4.8	1	0	185	15	64	20	4.4	0.6	28.3	33.9	83	13.3	4.76	57	0
5.8	7.12	53	6	10.2	89	989	6.1	142	41.8	12.5	1.5	23	2.3	12	13.9	23.3	1.3	1.526	0.218	19.184	21.8	0	0	343	16	122	19	3.4	0.1	32.5	30	108	12.5	3.86	34	0
5.8	7.34	20	23	7.6	91	286	2.7	131	31.9	11	2.4	63	1.9	2.2	13.2	24.3	1.2	0.238	0.357	10.71	11.9	0	0	121	20	101	17	2.7	0.4	32.3	34.4	94	17.8	3.4	57	0
5.8	7.37	24	19	8.5	105	99	4.6	143	33.6	11.1	1.9	27	2.3	3.9	17	30.8	1.5	0.736	0.276	5.612	9.2	0	0	413	9	41	14	2.7	0.1	30.9	33	94	14.5	3.59	89	0
5.7	7.26	32	15	7.5	91	83	6.1	132	37.8	12.6	5.2	66	1.2	7.6	15.3	35.6	1.6	0.407	0.185	0.481	3.7	1	1	261	267	32	563	1.8	1.5	31.3	33.3	94	13.3	4.03	61	0
5.7	7.34	22	17	7.7	98	131	3.6	133	35.2	12	1.6	33	2	9.3	14.7	150	1.5	0.418	0.209	13.585	20.9	0	0	128	205	109	243	2.4	1.6	31	34	91	14.4	3.86	82	1
5.7	7.32	20	19	8.8	104	295	6.9	136	28.3	9.7	2.4	43	1.8	1.4	18.2	31.1	1.7	2.983	0.471	11.618	15.7	0	0	362	104	146	153	2.5	0.7	32.6	34.2	96	16.7	2.96	61	1
5.7	7.41	25	15	9.5	104	104	3.5	140	44.3	15.4	4.4	65	1.7	1.5	15.2	25.9	1.5	0.3564	0.1452	12.6588	13.2	0.1	0.2	147	328	348	134	2.4	11.2	28.8	34.7	83	15.2	5.33	63	0
5.7	7.33	20	26	8.3	101	341	4.4	143	46.4	15.9	1.1	24	1.7	2.9	13.1	22.9	1.1	0.9682	0.5562	18.9726	20.6	0.1	0.3	254	32	70	116	3.4	0.7	32.4	34.3	95	12.9	4.89	71	0
5.7	7.28	20	26	9.7	92	95	4.9	133	45.2	14.6	1.2	33	2	4.1	54.3	32.2	5.8	1.7516	0.4292	9.2568	11.6	0.3	1.1	234	58	88	71	4.2	2.2	31.9	32.3	99	15.9	4.58	83	0
5.7	7.23	16	28	6.4	94	44	3.9	134	34.8	11.9	2.5	62	1.7	8.3	13.1	32.2	1.1	0.813	0	24.119	27.1	0	0	72	27	166	63	1.6	0.5	33	34.1	97	13.6	3.6	46	0
5.7	7.34	22	21	9.5	101	152	4.5	139	49.1	16	1.5	35	1.8	3.2	16.4	29.3	1.5	0.346	0.346	11.245	17.3	0	0	243	48	114	55	2.4	1.1	33.1	32.7	101	13.8	4.85	79	0
5.7	7.36	30	15	9.3	103	91	4	144	43.6	15	0.9	26	2.2	3.6	14.4	25.5	1.4	1.7745	0.5577	14.5002	16.9	0.2	0.2	222	15	142	32	2.9	0.9	32.1	34.4	93	14	4.69	82	0
5.7	7.19	26	15	8.9	103	232	4.6	139	27.9	9.6	2.8	64	1.5	4.7	14.3	30.6	1.4	0.64	0.704	2.944	6.4	0	0	201	19	60	30	2.9	0.3	39.3	34.3	115	13.8	2.43	76	0
5.7	7.44	24	20	8.7	94	470	4	134	42.8	13.9	1.9	32	2.2	3.7	12.1	26.1	1.1	1.4652	0.2376	8.1378	9.9	0.3	0.2	241	11	24	16	2.9	1	27.8	32.4	86	15.2	4.99	64	0
5.7	7.2	22	19	7.9	102	158	4	139	36.9	11.8	1.4	23	2	6.3	13	30	1.1	1.02	1.02	2.312	6.8	0	0	302	19	86	16	2.8	1.2	27.8	31.9	87	14.7	4.23	80	0
5.7	7.33	22	13	9.7	108	156	4.7	138	37.2	12	2.7	62	1.2	4	13.2	23.2	1.1	0.354	0	13.452	17.7	0	0	248	8	205	14	2.9	0.3	32.5	32.3	100	14.5	3.71	89	0
5.6	7.47	21	21	9.3	105	105	3.6	143	35.9	12	2.2	34	1.4	1.8	15.6	28.1	1.4	0.232	0.232	20.184	23.2	0	0	171	51	129	106	2.3	1.6	30.6	33.5	91	15.3	3.93	89	1
5.6	7.34	16	15	9	108	105	4.4	135	31.5	10.3	2.6	41	1.4	2.6	13.7	33.4	1.2	0.2544	0.0912	4.44	4.8	0	0.3	85	37	338	30	3.4	0.9	27.8	32.7	85	16.2	3.7	71	0
5.6	7.37	21	28	8.6	89	96	5.7	132	38.8	11.6	5.2	30	1.4	3.1	17.3	30.9	2	0.92	0	14.904	18.4	0	0	148	14	165	25	3.5	1.7	28.9	29.8	97	17.7	4	74	1
5.6	7.3	22	18	7.6	103	175	5	138	38	11.9	5.3	36	2.6	4.3	85	52.6	11.3	0.054	0.036	1.53	1.8	0	0	35	23	324	25	1.7	1.1	31	31.4	99	17.7	3.85	58	1
5.6	7.37	21	19	9.1	111	250	4.1	147	36.4	12.2	1.6	31	2.2	4.1	11.9	23.4	1	0.586	2.637	18.752	29.3	0	0	353	31	93	22	3.6	0.5	27.3	33.4	82	16.2	4.46	82	0
5.6	7.4	23	22	12.7	91	112	4.7	131	35.1	12.4	0.9	30	2	2.4	13.4	23.6	1.1	0.213	1.278	18.105	21.3	0	5	179	26	132	18	2.9	0.3	31.4	35.3	89	14.9	3.94	48	1
5.6	7.4	13	21	7.2	111	119	3.8	141	29	9.7	1	16	1.3	5.2	14.8	31	1.5	0.936	0.468	13.26	15.6	0	0	189	10	107	18	1.5	0.1	30.6	33.2	92	15.1	3.15	75	0
5.6	7.51	22	23	10.6	101	151	3.5	142	35.4	11.1	2.4	8	1.5	1.6	17.1	150	1.9	0.525	0.105	8.61	10.5	0	0	113	7	111	17	2.8	2.4	29	31.5	92	15.4	3.85	61	0
5.5	7.2	20	10	6.1	119	71	3.7	145	32.7	10.7	1.1	25	1.2	4.2	20.7	55.7	1.9	0.334	0.167	15.698	16.7	0	0	61	64	173	193	1.8	3.1	31.3	32.8	96	15.4	3.42	75	0
5.5	7.34	28	19	7	95	165	3.6	138	29.5	10.1	7	136	2.3	5.4	45.1	37.1	5.2	2.0217	0.3223	26.37	29.3	0.2	1.7	374	60	151	116	2.3	0.5	30.6	34.4	89	14.1	3.31	64	0
5.5	7.34	20	22	8.6	107	137	4.4	145	33.5	10.2	1.3	32	1.3	2.4	14	26.8	1.2	0	0.916	20.152	22.9	0	0	404	21	124	30	2.1	0.3	27.8	30.5	91	17.8	3.67	71	0
5.5	7.35	18	18	8.7	102	203	4.2	134	31.7	10.9	1.6	27	1.4	1.4	14.5	24.5	1.4	0.285	0.057	4.161	5.7	0	0	126	14	115	28	2.8	2.1	32.7	34.5	95	14.3	3.34	78	0
5.5	7.44	23	18	8.2	91	122	6.2	126	31.9	10.8	1.7	85	3.6	6.3	16.2	28.8	1.5	1.254	1.881	47.025	62.7	0	5	90	25	112	24	2.8	0.7	29.9	33.8	89	14.4	3.61	42	0
5.5	7.13	13	31	9.5	104	95	4.2	144	47.5	15.9	1	14	2.5	4.1	13.1	24.1	1.1	2.418	0.3813	6.2961	9.3	0.4	1.8	231	13	84	24	3.5	0.2	32.7	33.5	98	12.8	4.86	56	0
5.5	7.42	22	22	7.3	104	180	4	144	32.8	10.3	2.3	44	1.6	4	13.2	23.9	1.2	0	2.212	29.072	31.6	0	0	683	14	59	18	1.7	0.3	26	31.5	83	15.9	3.96	64	1
5.5	7.34	15	21	8	106	172	3	139	35.9	12.4	0.7	14	2.1	1.8	12.4	30.2	1.1	1.65	0.902	19.36	22	0.1	0.2	415	15	54	12	3.1	0.3	30.3	34.5	88	14.9	4.1	56	1
5.4	7.27	25	19	5.8	94	176	4.5	133	24.7	8.3	4.7	84	1.8	8.2	15.9	41.6	1.6	0.891	0.495	7.92	9.9	0	0	40	204	98	288	2.6	11.9	31.8	33.6	95	17.8	2.61	72	0
5.4	7.35	20	22	9	102	132	5.7	138	36	12.1	1.3	34	2.1	3.5	13.8	28	1.2	1.1446	0.295	10.3014	11.8	0.3	0.2	184	35	58	132	2.9	0.4	29.4	33.6	88	15.2	4.11	64	1
5.4	7.32	27	26	10.7	114	155	4.8	162	42.6	14	3.3	109	3.6	6.2	12.8	19.6	1.1	1.3467	0.4623	18.2709	20.1	0.1	0.1	385	46	284	102	3.5	1	32.1	32.8	98	19.7	4.35	87	0
5.4	6.96	20	11	7	112	105	4.3	139	34.4	10.7	2	48	1.6	6.8	36.6	53.5	8.9	1.209	0.124	0.341	3.1	0	0	184	25	19	65	2.9	0.3	31.7	31.1	102	17.9	3.37	86	1
5.4	7.36	19	18	7.6	105	392	3.2	139	35.8	12.7	1.2	27	1.7	1.2	14.9	25.8	1.4	0	0.191	16.808	19.1	0	0	154	33	81	43	2.7	0.8	33.8	35.3	96	13.4	3.75	78	0
5.4	7.45	17	23	9.8	101	159	5.2	136	37.1	12.7	1.5	47	2.5	5.8	14.4	128.2	1.3	1.4578	0.4366	5.4316	7.4	0.4	0.5	218	20	101	28	3.6	0.4	32.5	34.2	95	16.2	3.89	80	1
5.4	7.34	13	28	9.8	100	164	3.8	137	33.5	11.4	1.7	14	1.6	0.9	32.6	122.3	3.5	0.6318	0.3744	10.5651	11.7	0.3	0.8	252	23	73	27	3.7	0.3	30.1	34	89	15.5	3.77	64	0
5.4	7.31	24	23	10.2	93	181	3.5	136	46	15.8	1	13	2.6	5.6	11.9	24.8	1	0	0.388	15.132	19.4	0	0	402	26	119	25	4.6	0.6	30.3	34.3	89	14.5	5.2	57	0
5.4	7.34	16	22	7.2	110	572	3.4	145	33.2	10.9	1.4	75	1.9	2.7	13.9	32.5	1.2	0.6384	0.4104	14.1056	15.2	0.3	0.1	226	12	108	24	1.9	0.4	28.1	32.7	86	14.4	3.86	73	0
5.4	7.26	21	11	9.4	114	175	2.6	143	36.4	11.9	2.4	54	1.6	1.7	14.5	28	1.4	3.014	1.37	16.988	27.4	0	0	404	9	95	13	3.4	0.7	31.3	32.8	95	14.8	3.82	64	0
5.3	7.35	22	18	7.9	107	234	5.2	142	38.5	12.7	5.2	53	1.4	4.9	37.1	37.8	3.8	3.201	0.873	19.497	29.1	0	0	264	909	110	5757	2.3	0.4	28	32.9	85	18.7	4.53	65	1
5.3	7.41	22	15	11.4	105	66	3.8	138	31.4	10.9	2.4	38	2.1	4.2	14.9	24.4	1.3	6.532	3.976	8.236	28.4	1	11	109	65	477	211	3.1	1.6	29.8	34.8	86	14.5	3.67	63	0
5.3	7.37	29	16	13.2	92	206	6.8	130	41.6	14.6	1.4	30	1.7	5.4	12.4	22.8	1.1	1.925	0.65	22.275	25	0.2	0.3	717	52	260	87	5	0.4	30.2	35.1	86	16.7	4.84	49	0
5.3	7.55	17	24	9	92	203	4.1	129	32.6	11.5	0.9	13	1.2	3	13.2	29.7	1.2	2.0511	1.2879	12.2112	15.9	0.3	1.9	358	32	72	80	2.6	0.3	31.2	35.4	88	14.6	3.7	82	0
5.3	7.34	14	24	9.2	105	83	5.7	137	30.1	10.4	1.6	57	2.3	4.5	15.3	34.3	1.4	0.368	0.736	14.72	18.4	0	0	316	35	303	54	2	0.7	31	34.7	89	14.1	3.37	87	1
5.3	7.03	25	11	7	107	180	4.5	138	32.3	9.8	4.2	136	2.4	7.9	16.5	40.2	1.6	0.294	0.294	11.76	14.7	0	2	544	17	121	29	2.6	0.5	26	30.3	86	18.2	3.77	89	1
5.3	7.37	13	24	8.3	101	114	4.2	134	34.1	12.1	1.1	17	2.1	2.7	13	69.6	1.1	1.8315	0.5661	8.547	11.1	0.6	0.8	183	41	84	27	3.4	0.7	28.2	35.4	80	13.8	4.29	64	0
5.3	7.25	19	23	7.7	106	73	4.8	143	29.5	9.1	4.2	29	1.7	4.9	21.2	150	3.1	0.828	0.9384	25.7784	27.6	0.1	0	537	16	307	24	2.3	0.2	28.7	30.7	94	15.6	3.16	71	1
5.3	7.52	15	21	7.3	104	230	3.3	137	30.9	10.5	0.5	15	1.3	2.2	15	32.5	1.3	1.272	0.795	10.812	15.9	0	0	262	5	42	14	2.1	0.3	28.1	34	83	16.1	3.73	65	0
5.3	7.53	31	24	9	80	230	5.6	129	42.3	12.9	8.6	47	1.8	3.8	18.3	30.9	2.2	1.08	0.552	22.296	24	0.2	0.1	463	8	93	13	2.5	0.4	27	30.5	89	16.4	4.78	44	0
5.2	7.2	23	20	7.6	103	130	5.6	140	31.3	8.8	4.7	85	2.3	9.5	41.4	42	4.1	2.5955	0.5549	14.6959	17.9	0.2	0	296	793	430	1981	2.7	0.5	22.2	28.1	79	17.3	3.95	76	1
5.2	7.4	21	24	10.2	94	138	5.7	133	42.7	14.8	2.1	49	2.2	4.3	15.4	27.1	1.6	2.506	1.074	13.604	17.9	0	0	255	192	147	291	2.9	1.7	33.4	34.6	96	13.4	4.43	75	0
5.2	7.21	16	24	6.2	107	116	3.5	143	40.5	12.7	0.6	26	1.6	2.9	12.8	24.6	1.1	0.375	0.3	6.825	7.5	0	0	176	85	91	160	2.9	1.6	28.6	31.4	91	13.1	4.46	86	0
5.2	7.4	15	25	9.9	104	156	4.8	139	28.4	8.9	1.6	47	1.5	7.5	23.5	79.9	2.2	2.304	0.432	8.64	14.4	0	3	105	78	55	129	3.3	10	23.1	31.5	73	24.9	3.88	73	0
5.2	7.34	22	17	9.1	83	132	6.4	116	31.4	9.3	3.7	74	2.3	5.1	150	72.3	23	0.786	1.31	23.58	26.2	0	0	335	81	164	89	3.2	2.4	23.5	29.6	80	20.1	3.95	66	1
5.2	7.36	35	16	9.9	114	142	8.9	156	45.6	15.2	7.9	104	3.3	5.2	14.1	18.9	1.3	1.065	0.639	18.318	21.3	0	0	187	28	96	89	4.1	0.8	29.1	33.2	88	14.7	5.21	89	0
5.2	7.46	19	24	10.3	112	734	4.7	150	28.1	9.1	1.5	70	2.5	2.6	13.9	21.5	1.3	1.1055	0.7839	18.0297	20.1	0.4	0.5	485	14	149	39	2.9	0.1	29.7	32.3	92	14.8	3.07	64	0
5.2	7.1	27	19	8.6	92	152	3.1	135	40.5	14.5	0.8	21	1.3	2.4	15.9	44.8	1.7	1.65	0.99	20.46	33	0	0	345	34	158	26	2	2.3	30.3	35.7	85	14.9	4.78	59	1
5.2	7.3	16	24	8.4	96	205	3.5	132	33.1	11.5	1.1	13	1.8	2.8	13.5	29.8	1.2	0.32	0	0.064	0.4	0	0	99	15	73	25	2	0.5	30.8	34.8	89	14.3	3.74	80	0
5.2	7.27	22	22	7.9	97	218	4.1	137	35.8	12.4	2	45	1.6	3.2	15.5	31.8	1.4	1.704	0.284	14.2	28.4	0	0	203	20	55	23	3.7	0.9	29.9	34.7	86	14.1	4.15	88	0
5.2	7.36	21	19	7.9	100	107	4.7	135	33.5	10.8	1.2	26	1.7	3.6	15.7	27	1.4	0.452	0.904	21.018	22.6	0	0	460	12	99	20	2.9	0.5	29.2	32.3	91	15.6	3.7	83	0
5.2	7.34	20	25	8.2	102	181	5.1	142	37.3	13.1	1.3	30	1.6	3.1	14.1	28.5	1.3	1.1356	0.5177	14.9966	16.7	0.1	0.1	246	18	110	19	3.7	1.3	32.3	35.1	92	12.9	4.04	72	0
5.1	7.34	22	17	9.6	101	186	3.6	136	44.1	15.7	1.6	30	1.7	1.6	15.2	33.9	1.5	0.777	0.111	7.326	11.1	0	0	54	115	96	243	3.5	0.7	30	35.7	84	14.3	5.25	51	0
5.1	7.3	17	21	6.6	103	220	4.3	137	34.2	11.5	1.1	30	1.5	2.2	14.9	33.9	1.5	0.055	0.11	4.51	5.5	0	0	50	81	62	196	2.6	1.1	28.2	33.7	84	16	4.09	49	0
5.1	7.25	20	18	8	107	99	3.9	141	33.8	11.1	2	31	1.3	2.7	14.5	31.1	1.5	0.448	1.344	15.008	22.4	0	1	162	52	175	130	3	0.8	30.3	32.8	92	13.1	3.66	73	0
5.1	7.09	19	16	6.5	123	614	4.5	153	30.7	9.4	3.5	99	2.3	6.1	16.3	36.7	1.8	0.885	0.354	13.806	17.7	0	1	221	68	55	94	2.3	0.5	29.4	30.5	96	13.5	3.19	64	0
5.1	7.41	27	19	9.9	99	115	5.4	140	48.2	17.2	1.9	30	1.7	1.1	14	28.2	1.3	1.244	1.244	20.215	31.1	0	1	275	46	59	93	4.2	1.7	32	35.7	90	13.2	5.38	74	0
5.1	7.32	30	16	8.9	101	34	5.5	141	36	10.9	3.6	118	2.7	9.9	12.9	36.9	1.2	1.292	0.3192	13.5584	15.2	0.2	0.1	192	21	115	74	2.7	1	27.4	30.2	91	17.9	3.96	64	1
5.1	7.29	21	23	10.1	100	234	4.7	139	43.9	15.9	1.5	25	2.4	5.4	19.6	43.1	1.8	3.9312	0.5304	10.9668	15.6	0.4	0.9	317	85	71	70	4.7	0.5	32.8	36.1	91	12.9	4.83	77	1
5.1	7.33	21	18	7.6	109	195	4	144	46.2	16.6	1.4	24	2.2	5.9	16.5	75	1.5	1.3161	0.1968	10.7379	12.3	0.1	0.4	72	33	56	41	2.9	0.5	30.9	35.9	86	13.6	5.37	80	1
5.1	7.61	24	13	9.6	103	197	3.9	136	43.7	15.6	2.7	27	1.5	2.8	13.4	29.5	1.2	2.394	0.266	7.98	13.3	0	0	152	10	86	33	2.9	0.4	31.8	35.6	89	13.1	4.9	66	0
5.1	7.19	18	19	6.1	107	127	3.9	140	33.2	10.5	1.2	24	1	2.1	17.4	39.4	1.6	0.27	0.27	8.37	13.5	0	0	337	31	89	33	2.1	0.3	28.2	31.7	89	15.4	3.73	77	0
5.1	7.38	18	21	8	126	119	4.8	160	27.4	8.7	5.8	132	1.6	4.4	14.6	30.5	1.4	0.4158	0.0891	2.1789	2.7	0.6	0.1	104	19	145	22	1.9	0.7	29.6	31.7	93	15	2.94	84	0
5.1	7.37	19	19	7.1	106	122	5.2	139	30	9.2	3.3	20	1.5	4.2	27.2	45.6	5.5	0.441	0.171	3.843	4.5	0.3	0.6	93	16	128	19	2.6	0.4	31.4	30.8	102	14.9	2.95	72	0
5.1	7.45	22	22	9.9	101	160	4.6	140	37.3	12.4	0.8	26	1.7	3.7	13.3	25.6	1.2	1.695	0.452	4.52	11.3	0	0	341	9	74	9	2.4	0.5	33.1	33.3	100	12.2	3.74	61	0
5.1	7.35	16	23	6.6	103	111	6	136	39.4	13.2	0.9	15	1.1	3.3	20.4	33.4	2.9	1.9695	0.7979	6.3327	10.1	0.7	9.3	480	5	54	8	1.9	0.3	29	33.3	87	15	4.54	81	0
5	7.24	22	15	9.2	102	271	4.4	135	37.7	12.5	1.4	12	1.5	3.9	13.2	22.1	1.1	0.3876	0.0782	2.8764	3.4	0.8	0.9	417	184	264	245	2.9	0.3	28.5	33.3	86	14.9	4.4	53	0
5	7.23	25	11	6.3	98	79	3.4	131	27.9	9.6	4.1	43	0.9	5.5	23	37.7	2.2	0.188	0.376	13.536	18.8	0	0	137	178	317	137	2.8	3.6	27.4	34.5	80	16.5	3.51	68	0
5	7.42	15	26	9.4	98	144	4.4	135	37.2	11.8	1.3	63	1.6	4	54.5	90.3	20.6	1.3545	0.3465	8.631	10.5	0.7	0.8	277	26	137	104	3.2	0.4	28	31.7	88	16.2	4.22	72	0
5	7.34	18	22	8.3	85	125	5	120	35.7	12.7	3.7	50	1.6	2	15.8	32.4	1.7	0.98	2.45	20.09	24.5	0	0	70	59	229	81	2.5	2.4	33.5	35.7	94	15.6	3.8	43	0
5	6.87	19	27	7.8	111	219	5.6	151	45.7	15	5.5	131	2.5	9.6	19.4	36.5	1.9	0.24	0	4.02	6	0	1	185	50	149	54	2.9	1.3	33.8	32.8	103	14	4.44	56	1
5	7.36	17	37	8.1	80	120	2.6	131	37.8	13.7	0.6	17	1.3	1.5	17.8	36.3	1.8	0.595	0.476	9.52	11.9	0	0	283	20	98	38	2.9	0.5	30.5	36.4	84	13	4.5	22	0
5	7.29	26	14	9.3	99	116	6	133	42.9	12.6	1.1	28	1.4	6.4	18.2	31	1.6	1.4535	0.9333	12.7755	15.3	0.6	0.3	319	17	111	36	4.1	1.4	22.7	29.4	77	18.9	5.55	63	0
5	7.34	23	24	9	95	177	5.8	136	37.5	12.2	3.4	74	2.5	5.2	19.5	28.7	1.9	1.08	2.052	6.264	10.8	0	0	100	31	87	28	3	0.5	39.8	32.6	122	18.7	3.07	64	1
5	7.31	23	22	7.5	98	140	6.8	136	34.2	11.7	2.6	48	1.3	3.4	15	24.1	1.5	2.72	0.51	12.75	17	1	1	467	36	80	28	2.5	0.5	30.4	34.1	89	17.3	3.84	74	0
5	7.45	24	19	6.9	124	185	5.2	162	35.7	11	2.6	113	2.6	5.4	14.3	26.5	1.2	0.588	1.176	12.936	19.6	0	0	186	6	74	27	1.9	0.3	31.2	30.8	101	15.4	3.53	80	1
5	7.35	14	24	8.5	101	78	3.9	135	34.7	11.4	0.7	29	1.6	2.3	17.2	40.5	1.6	0.3	0.25	1.75	2.5	0	0	76	14	884	26	2.3	2	32.6	32.8	100	18	3.49	61	0
5	7.36	22	20	8.9	98	90	4.9	135	31.7	10.7	0.8	15	2.3	4.4	13.3	30.1	1.2	0.52	7.8	43.16	52	0	0	255	13	118	25	3.8	0.6	32.9	33.9	97	18.8	3.27	81	0
5	7.34	16	27	7.7	98	128	3.4	138	34	10.8	1	14	1.9	2.1	12.5	22.3	1.1	0.2403	0.1335	8.4194	8.9	0.1	1.1	262	26	64	25	3.6	0.4	23	31.7	73	15.5	4.69	58	0
5	7.34	22	22	8.9	97	187	3.8	137	42.7	15.2	1.1	19	1.5	2.3	12.2	21.4	1	0.3864	0.1848	7.6524	8.4	0.5	1.6	251	21	82	23	4.6	1.2	30.4	35.6	85	13.4	5.01	50	0
5	7.34	14	26	8	106	108	3.7	142	34.5	12.6	0.8	21	1.9	2.7	14.1	32.7	1.3	0.136	0.476	1.87	3.4	0	0	340	6	68	20	2.4	0.6	29.8	36.5	82	15.1	4.23	83	1
5	7.38	16	23	8.3	108	120	3.5	143	30.3	10.4	1.5	39	1.9	1.3	13.4	29.7	1.1	0.2479	0.0536	6.3315	6.7	0.2	0.8	131	12	64	20	2.6	0.8	30.8	34.3	90	13.8	3.38	64	0
5	7.41	24	19	8.5	94	389	5.4	132	33.9	10.8	1.8	40	1	4	14.1	25.8	1.3	0.6501	0.3743	18.6559	19.7	0.1	0	503	12	87	19	3.2	0.6	25.3	31.9	79	15.9	4.27	78	0
5	7.34	19	22	8.5	104	151	5.3	140	32.1	10.5	3.6	60	1.9	4.2	21.6	35.1	3.1	2.826	0.628	24.806	31.4	0	1	346	9	71	18	2.9	0.3	27.4	32.6	84	16.2	3.82	76	1
5	7.47	15	31	10.3	98	213	4.6	139	38.9	14	0.9	23	2.2	3.3	13.6	31.8	1.2	0.54	0.675	11.475	13.5	0	1	136	8	77	15	4.1	0.7	30.5	36	85	15.1	4.6	81	0
4.9	7.34	16	30	9	93	234	5.9	133	40.9	12.5	2.3	64	2.8	6.1	33	30.1	3.3	1.23	0.6027	10.4181	12.3	0.3	0.1	307	1489	168	2401	3.5	2.1	25.4	30.7	83	15.6	4.93	71	0
4.9	7.1	23	22	9.2	102	85	5.4	142	38	12	3.3	58	2.5	5.7	14.2	26.7	1.3	0.78	0.936	11.856	15.6	1	1	234	119	347	132	2	5.8	28.9	31.6	91	16.3	4.16	85	0
4.9	7.27	18	29	9.4	91	202	5	133	33.9	9.9	2.9	45	2.3	5.2	15.7	29.8	1.6	0.5355	0.3825	13.8924	15.3	0.3	2.9	474	51	264	94	2.9	0.8	27.7	29.4	94	16.9	3.59	59	0
4.9	7.37	20	20	6.8	100	111	4.2	136	20.1	7.5	2	39	1.2	3.8	13.1	25.5	1.1	3.552	0.037	0.074	3.7	0	0	20	115	119	66	2.6	2.2	31.2	37.5	83	16.7	2.41	48	0
4.9	7.27	22	16	8.3	127	149	4.5	160	31.3	9	3	82	2.9	5.9	14.8	25.8	1.3	1.1125	0.275	11.075	12.5	0.2	0.1	161	44	89	65	3	0.2	27.6	28.7	96	15.9	3.27	87	0
4.9	7.34	21	20	8.2	102	187	4.3	139	38	13.5	2.1	41	2	1.9	13.7	30.3	1.2	0.75	0.625	9	12.5	0	0	226	28	61	59	4	0.8	30.9	35.6	87	13	4.37	66	0
4.9	7.36	12	26	8.2	101	120	4.5	134	30.6	9.9	0.4	25	1.3	2.2	13.1	29.8	1.1	0.072	0	3.06	3.6	0	0	300	13	71	35	2.9	0.4	30.8	32.4	95	15.9	3.21	61	0
4.9	7.45	18	27	8.3	99	99	3	141	48.7	15.3	2.2	18	1.3	3.1	14	26.5	1.3	1.7	0	26.18	34	0	0	273	22	108	26	2.2	1.2	32.4	31.4	103	16.2	4.72	81	0
4.9	7.44	22	15	11.2	103	203	5.6	134	34	11.6	1.4	28	2	3.4	14.1	23.6	1.2	1.218	0.348	15.834	17.4	0	0	364	23	109	24	4.8	0.3	31.8	34	93	13	3.64	71	0
4.9	7.34	20	23	9.3	96	296	5	134	32.8	10.7	1.2	33	1.3	3.4	13.6	23.3	1.2	0.637	0	7.917	9.1	0	0	441	16	104	20	3.6	0.6	28.4	32.5	87	13.5	3.77	62	0
4.9	7.48	22	26	8.6	95	249	5.8	137	36.3	13.1	7.2	48	1.6	4.6	22.8	31.1	3.4	0.145	0.435	13.485	14.5	0	0	125	11	70	15	3.4	0.8	33.2	36	92	14.6	3.93	62	0
4.9	7.02	39	5	7.3	85	1240	8.7	134	39.9	10.8	4.5	70	3.1	9.2	11.9	33.6	0.9	1.1481	0.1806	11.4939	12.9	0.1	0.4	324	8	126	11	3.1	0.1	26	27.1	96	14.2	4.16	64	0
4.8	7.09	19	19	8	111	152	3.6	145	39.3	13.7	1.3	21	1.9	5.1	23.7	38	3.7	0.7209	0.0648	7.3143	8.1	0	0	63	4833	164	4359	3.5	3.4	36	34.9	103	14.7	3.82	30	1
4.8	7.26	19	23	9.7	98	138	6.1	134	43.9	13	1.6	27	1.9	2.9	18.9	29.3	1.7	2.604	1.519	14.539	21.7	1	3	427	50	256	177	3.9	1.8	26.9	29.7	91	18	4.85	72	0
4.8	7.28	14	17	8.9	109	107	4.5	135	35.1	12.3	2.4	31	1	3.3	13.7	32.7	1.2	1.002	1.336	10.521	16.7	0	0	266	132	118	127	2.9	1.8	31.5	35	90	14.7	3.91	52	0
4.8	7.4	22	27	7.7	95	178	5.1	139	46.3	15.3	8.7	47	1.8	2.7	12.5	24.4	1	2.1855	0.1023	6.975	9.3	0.2	0.2	210	86	224	100	2.4	1.5	33.7	33.1	102	15.7	4.55	57	1
4.8	7.38	22	26	10.6	94	649	4.4	138	41.3	13.7	1.2	45	2.5	3.2	13.1	27.8	1.1	1.271	0.861	18.3475	20.5	0.1	0.1	396	39	75	65	3.7	0.4	31.8	33.1	96	13.8	4.3	64	0
4.8	7.47	21	27	11.3	93	126	5.5	135	47.6	14.8	2.2	74	2.9	4.8	26.8	37.6	2.6	1.1607	0.4929	14.1351	15.9	0.1	0.6	165	23	128	46	2.5	3.3	31.6	31.2	102	20.2	4.69	83	1
4.8	7.26	17	23	8.7	104	158	5.4	139	43.4	15.4	2.1	25	1.8	2.7	16.8	31	2	1.083	0.722	30.685	36.1	0	0	225	20	91	40	3	1.6	29.8	35.5	84	12.4	5.17	37	0
4.8	7.27	21	26	8.8	98	286	4.2	139	43.2	13.4	2.1	40	2.9	6.6	13	25.8	1.1	3.4875	0.3375	8.8375	12.5	0.2	0.9	311	21	163	31	4.2	0.3	29	31.1	93	13.8	4.63	64	0
4.8	7.34	17	26	9.1	96	129	5.6	133	44.2	15.4	0.9	12	1.4	2.8	13.4	28.4	1.1	0.9592	0.7957	9.0797	10.9	0.2	0.4	95	19	95	27	3.9	0.6	33.3	34.8	96	13.7	4.62	64	0
4.8	7.19	19	24	6.8	133	672	5.9	170	39.4	11.1	2.1	75	1.8	3	67.9	37.9	7.9	1.6	0.3	18.04	20	0.3	0.1	424	12	129	27	2.2	0.2	22.6	28.2	80	16.8	4.91	83	0
4.8	7.34	21	25	9.6	89	193	4.8	130	38.5	12.4	1.2	30	2.8	5.4	11.6	22.8	1	0.666	0.666	20.868	22.2	0	0	686	9	90	23	4	0.4	31.5	32.3	98	14	3.95	64	0
4.8	7.27	33	20	8.9	94	136	6.5	140	29.4	10.1	3.9	115	5.1	7	17.5	47.3	1.6	1.206	0.804	16.281	20.1	0	2	429	29	251	18	2.3	0.3	29.1	34.3	85	17.3	3.47	79	1
4.8	7.34	18	21	8.1	105	180	3.5	140	33.7	11.8	1.1	27	1.4	1.7	13	25.6	1.1	0.234	0.078	2.262	3.9	0	0	164	13	43	18	3.3	0.5	30.1	35	86	15.3	3.91	80	0
4.8	7.3	18	22	8.4	103	146	4.7	138	33.2	11.1	1.6	43	1.6	2.8	15.2	73.6	1.5	0.556	0	24.742	27.8	0	0	144	18	78	16	2.7	0.7	31.4	33.4	94	17.6	3.55	64	0
4.8	7.39	19	22	7.9	105	192	5.8	140	40.3	13.3	0.9	42	1.5	2.8	13.6	27.3	1.2	1.939	0.277	22.16	27.7	0	1	604	6	61	10	2.4	0.4	30.5	32.9	93	15	4.35	82	0
4.7	7.49	20	28	8.3	102	124	3.5	146	38.1	12.9	0.9	38	1.9	2.5	14.2	29.8	1.3	3.328	0.256	14.592	25.6	1	1	100	194	644	148	2.9	20.2	29.9	33.9	88	17.7	4.31	79	1
4.7	7.49	18	27	8.9	95	179	4	136	39	13.3	0.7	17	1.7	2.6	12.8	19.7	1.1	2.0111	0.2737	9.4486	11.9	0.9	0.5	283	204	709	130	2.9	5.6	30.1	34.1	88	16.5	4.42	59	0
4.7	7.35	21	14	8.5	97	95	5.4	127	34.8	11.9	5.5	83	1.7	4.9	20.8	41	2.7	0.173	0.865	11.764	17.3	0	0	61	22	65	43	3.3	2.6	32.5	34.3	95	16.5	3.67	73	1
4.7	7.41	21	30	9.8	98	157	4.7	144	34	11.1	0.9	62	2.7	7.8	13.7	32.6	1.2	0	0.514	46.26	51.4	0	0	966	25	94	41	2.4	0.4	31.3	32.7	96	14.9	3.56	64	0
4.7	7.41	15	27	7.9	93	100	3.2	132	27.4	9.6	1.4	16	1.3	2.9	22.4	43.8	2.2	0.6437	0.1804	3.2103	4.1	0.4	1.1	104	11	148	35	2.5	9.4	36.2	35.1	103	16.1	2.65	60	0
4.7	7.32	19	19	8.9	104	93	4.2	138	31.9	10.3	2.6	57	2	3.3	40.9	29.7	4.3	0.58	0.464	10.324	11.6	0	0	158	21	78	32	3.7	1.1	31.3	32.2	97	15.1	3.29	84	0
4.7	7.35	22	17	8.6	99	142	5	133	31.7	10.3	0.8	29	2.2	4.7	12.6	26.6	1.1	2.856	0.816	15.912	20.4	0	1	778	29	149	29	2.4	0.3	23.6	32.4	73	16.7	4.34	81	1
4.7	7.4	21	21	8.7	102	253	4.4	140	27.6	9.4	1.8	39	1.1	3.4	14	25.5	1.3	1.512	0.576	9.828	12	0.3	0.4	312	11	73	28	3.5	1.3	31.3	34.1	92	13.5	3.01	62	0
4.7	7.42	18	32	8.8	94	229	3.9	140	37	12.2	1.1	23	1.4	2.9	13.1	28.4	1.1	1.242	0.2025	11.907	13.5	0.3	0.9	165	25	149	20	2.9	0.6	25.9	33	79	14.9	4.71	77	0
4.7	7.42	23	24	9.4	96	276	4.1	139	41.7	14.3	1.4	32	1.7	3.8	12.3	21.4	1	1.53	0.1836	13.3875	15.3	0.3	0.9	283	25	61	19	3.7	0.3	34.1	34.2	100	14.2	4.19	70	0
4.7	7.1	20	19	7.6	103	43	4.4	138	32.2	10.8	1.5	25	0.8	2.8	16.4	30.1	1.5	1.086	3.982	30.046	36.2	0	0	530	6	88	15	2.5	0.4	31.2	33.7	93	18.5	3.48	65	0
4.6	7.18	23	17	7.1	104	144	5.3	139	32.8	10.4	3.2	40	2.3	5.3	17	33.3	1.5	0.98	0.14	11.48	14	0	0	412	2709	118	5253	3.4	0.8	24.7	31.7	78	15.2	4.21	36	0
4.6	7.39	20	16	7.4	107	120	2.9	140	33.8	12	1.4	29	1.4	4	17.3	29.7	3.1	0.342	0.456	8.322	11.4	0	0	95	232	96	185	3.1	5.8	31.9	35.4	90	14.6	3.76	75	0
4.6	7.31	20	24	8.3	93	112	5.6	131	27.9	9.8	4.6	94	2.7	6.3	14.1	33	1.3	1.2144	0.192	3.2832	4.8	0.3	1.9	147	73	149	112	3.6	0.6	32.5	35.1	93	15.5	3.02	83	0
4.6	7.28	17	14	8	112	65	3.7	139	41.6	14.6	2.1	17	0.9	3	18.6	44.1	1.7	0.216	0.144	3.204	3.6	0	0	53	40	123	68	2.5	4.8	36.5	35	104	14.3	3.99	57	0
4.6	7.34	18	27	8.7	103	184	5.3	143	45.1	15.7	1.5	17	1.7	2.3	13.4	28.6	1.2	0.918	1.224	25.398	30.6	0	1	217	71	103	56	3.7	0.8	36.1	34.8	104	16.5	4.35	53	0
4.6	7.46	17	25	8.3	104	102	3.8	142	25.5	8.8	0.9	36	1.6	3.2	14.1	47.1	1.3	1.5089	0.7258	16.8271	19.1	0.2	0.1	113	27	111	33	3	0.5	31	34.4	90	14.8	2.84	76	0
4.6	7.27	17	26	9	95	229	3.6	134	36.4	12.3	1.5	24	1.6	1.2	15.3	26.4	1.6	1.33	0.931	6.384	13.3	0	1	283	25	65	26	3.4	0.8	29.8	33.7	88	13.7	4.12	83	1
4.6	7.38	18	26	8.4	101	134	3.7	141	42.5	13	2.9	26	1.5	1.4	15.5	25.1	1.4	0.226	1.13	8.475	11.3	0	0	344	19	101	24	3.4	0.4	27.1	30.6	89	15.9	4.81	84	1
4.6	7.41	20	29	10.2	100	191	4	145	40	13.1	1.3	32	1.5	2.4	14.4	24.3	1.3	0.786	1.179	7.074	13.1	0	0	249	16	98	23	4.9	0.3	32.1	32.8	98	14.1	4.08	76	0
4.6	7.41	15	21	9.2	106	160	4.1	138	44	16	0.9	24	2.1	2.4	14	29.1	1.2	0.3393	0.2001	8.1432	8.7	0.1	0.1	124	37	96	19	3.7	0.5	33.3	36.2	92	14.1	4.79	67	0
4.6	7.43	16	17	9	118	189	3	148	46	16.6	0.5	10	2.1	2.8	12.7	21.5	1.1	0.665	0.38	6.745	9.5	0	1	135	15	43	15	2.9	0.2	33.3	36.1	92	13.5	4.99	64	0
4.6	7.34	20	23	9.1	97	157	4.4	136	30.6	10	1.7	31	1.9	2.7	16.8	34.4	1.5	0.9964	0.3384	7.9712	9.4	0.2	0.8	318	14	129	13	2.8	0.8	25.4	32.8	77	19.9	3.96	75	0
4.5	7.36	23	19	7.7	114	70	7.7	148	44.9	15.3	3.1	35	1.9	6.9	28.4	85.5	2.7	1.5688	1.2432	11.7808	14.8	0.7	0.7	39	203	110	862	2.9	3	34.1	34	100	17.3	4.48	56	1
4.5	7.3	19	19	7.6	107	108	4.7	140	35.1	11.6	1.9	41	1.7	4.1	17.9	139.2	2	0.984	0.492	13.448	16.4	0	0	113	55	93	223	3.7	0.9	31.9	33.1	96	13.6	3.65	64	0
4.5	7.33	23	16	6.9	106	130	4	141	37.3	12.7	2.6	30	1.2	3.3	14.5	23.5	1.3	0.336	0	3.408	4.8	0	0	140	206	183	163	3.9	9.9	31.8	33.9	94	14.3	3.97	85	0
4.5	7.21	16	20	7.2	103	130	3.7	135	41.1	13.3	1.6	29	1.4	4.4	23.8	39.2	2.3	7.014	4.008	17.368	33.4	0	6	69	84	149	159	2.7	1.3	32.6	32.5	100	15.1	4.1	54	0
4.5	7.43	19	19	8.6	102	174	3.5	136	34	11.8	1	15	1.5	3.5	12.3	31.4	1	1.1656	0.248	10.7756	12.4	0.2	1.6	317	73	149	112	3.3	1.3	27.4	34.7	79	14.2	4.31	64	0
4.5	7.2	16	12	5.1	117	105	3.8	141	33.6	12.1	1.9	26	0.9	3.4	20	59.3	1.9	0.66	0.165	12.54	16.5	0	0	87	68	34	105	2.3	3.3	30.4	35.9	85	13.5	3.97	22	0
4.5	7.3	18	22	7.3	99	280	4.4	135	36.9	13	1.4	34	2	2.8	13.4	27.1	1.1	0.435	0.029	2.291	2.9	0	1	155	72	107	99	2.9	1.2	30.4	35.3	86	14.5	4.28	64	0
4.5	7.49	25	16	7.6	80	193	4.7	116	35.5	11.8	0.9	19	2.2	3.4	13.6	22.2	1.3	0	1.74	27.26	29	0	0	401	99	267	97	3.4	1	28.4	33.2	86	15.3	4.15	54	0
4.5	7.37	24	15	7.7	100	118	5.7	133	39.1	12.6	6.9	98	3	8.4	22.9	39.8	3.5	0.91	0.84	12.194	14	0.1	0.3	277	35	135	60	2.3	1.8	34.9	32.2	108	17.7	3.61	84	1
4.5	7.35	16	28	8.2	87	521	3.9	127	28.9	9.7	1.1	21	1.9	1.5	13.9	28.8	1.3	0.2475	0.3795	15.84	16.5	0	0.1	131	59	199	55	2.9	0.8	30.6	33.5	91	13.5	3.18	81	1
4.5	7.37	22	23	6.7	101	114	5.1	141	47.1	15.1	2.4	58	1.5	5.6	14.3	36.6	1.4	1.52	0.24	1.12	4	0	0	78	24	152	54	2.9	0.7	27	32	84	14.1	5.59	74	1
4.5	7.4	14	17	6.1	111	93	3.2	139	24	7.7	1	18	1.3	2.7	18.1	55.5	1.7	0.178	0.178	13.706	17.8	0	0	61	31	89	51	2.5	2.6	26.7	32.1	83	16.7	2.88	27	0
4.5	7.15	8	27	8.9	115	174	4.5	145	39.7	12.1	0.9	41	2.4	5.4	13.7	27.3	1.2	0.4773	0.5805	11.7906	12.9	0.2	0.1	340	40	64	51	2.2	0.3	30.6	30.6	100	15.9	3.97	86	1
4.5	7.5	23	24	9.6	105	148	3.5	148	45.9	15.5	2.8	52	2.1	1.8	17.5	26.4	1.6	1.362	0.7491	20.203	22.7	1.4	0.2	414	14	86	48	4.3	0.5	30.8	33.8	91	13.5	5.04	82	0
4.5	7.39	17	23	8.4	102	167	2.8	139	36.1	12.9	0.9	22	2.1	2.6	21.9	27.3	2.1	0.39	0.7644	14.3832	15.6	0	0.3	227	19	135	33	3.6	0.3	30.8	35.8	86	14.7	4.2	69	0
4.5	7.33	18	16	6.4	107	122	4	137	19.9	5.9	3.8	19	2.4	5.4	64	47.5	7.7	1.504	0.282	7.05	9.4	0	3	477	19	173	32	1.6	0.2	31.7	29.8	106	18.5	1.87	62	0
4.5	7.33	14	26	7.9	106	249	5.2	141	25.4	8.2	2.5	33	2.1	5.9	25.6	72.2	2.5	0.6692	0.3346	22.8723	23.9	0.1	0.1	577	83	152	21	2.9	0.3	27.9	32.3	86	13.9	2.94	72	0
4.5	7.34	22	24	10.6	105	144	4	147	40.9	12.8	1.6	11	2.1	2.8	14.7	23.6	1.4	1.664	0.52	7.956	10.4	0.7	1.8	308	22	99	20	4	0.7	29.1	31.3	93	14.9	4.39	55	0
4.5	7.41	19	22	8.9	104	138	4.4	141	34.1	11.2	1.1	24	1.5	3.4	12.7	19.8	1.1	1.6482	0.4824	17.9493	20.1	0.1	0.1	404	54	118	15	3.3	0.5	29.1	32.7	89	14.8	3.84	84	0
4.4	7.36	21	26	10.6	93	118	5.4	135	33.7	10.3	3	61	2.9	4.9	13.6	25.9	1.2	2.516	0.8584	11.322	14.8	0.6	0.2	433	37	374	246	2.7	1.2	22.8	30.5	75	20.2	4.5	82	0
4.4	7.34	14	27	6.7	95	443	5.8	130	31.5	11.1	1.2	15	1.7	2.1	17.5	41	1.6	0.858	0.1364	3.3528	4.4	0.1	1.2	23	66	205	113	3.1	2.8	34.7	35.3	98	15.4	3.2	57	0
4.4	7.26	20	27	9.9	96	185	4.7	138	31.2	10.6	7.8	43	2	4.8	13.7	30	1.2	1.1815	0.5699	11.8984	13.9	0.2	1.5	250	73	149	112	2.9	1.3	33.6	33.9	99	14.1	3.15	75	0
4.4	7.3	15	24	8.3	107	172	5.1	141	27.2	8.2	3	86	1.9	4	14.6	28.7	1.3	0.6758	0.1526	20.9498	21.8	0.1	0.1	216	54	524	112	2.2	6.4	27.7	30.1	92	18	2.95	79	1
4.4	7.29	29	17	8.2	91	327	6.5	130	34.1	11.1	4.2	129	2.1	6.5	38.6	40.1	4.3	0.932	2.097	18.174	23.3	0	0	307	45	329	91	2.3	1.2	35.3	32.5	109	20.5	3.14	67	0
4.4	7.14	27	14	7	95	136	4.7	131	26.4	8.9	8.7	63	1.9	6.7	28	48.9	2.8	0.9656	0.3692	12.6522	14.2	0.3	1.2	177	15	270	69	3.6	35.7	38.4	33.6	114	13.9	2.31	50	1
4.4	7.34	15	21	9.5	106	110	3.8	138	41.3	14	1	16	1.3	2.1	16.9	35.3	1.9	1.1	1.65	22.825	27.5	0	0	187	66	68	66	3.8	4.7	34.1	33.8	101	15.4	4.09	66	0
4.4	7.13	21	28	9.1	93	151	3.9	138	36.7	12.2	2.2	61	1.5	4.4	13.7	20.8	1.2	0.481	0.065	0.715	1.3	1	2	399	9	288	64	2.3	16.3	27	33.3	81	22.4	4.52	63	1
4.4	7.34	16	32	9.2	95	185	2.7	140	42.8	14.5	1.1	11	1.4	1.6	13.4	23.9	1.1	0.8236	0.3195	5.9072	7.1	0.4	0.4	221	62	141	64	4.5	1.2	27.9	33.9	82	15.2	5.21	56	0
4.4	7.32	21	15	8	105	192	5.5	135	38.1	12.3	1.4	27	1.3	2.3	15	24.2	1.3	0.49	0	0.7	3.5	0	0	250	37	466	53	2.1	0.8	29.6	32.3	92	13	4.15	63	0
4.4	7.36	15	19	7.2	100	110	4.4	130	35.9	12	2	24	1.5	2.9	13.7	23.7	1.3	0	0.927	9.373	10.3	0	0	287	21	222	44	1.9	0.3	31.7	33.5	95	17.8	3.8	65	1
4.4	7.22	16	21	9.6	119	180	4.1	152	45.7	14.7	0.9	35	2.4	3.5	13.5	22.7	1.2	3.31	0.52	6.09	10	0.5	0.2	137	53	80	44	3.1	0.3	29.3	32.1	91	16.1	5.02	88	0
4.4	7.49	15	23	7.7	105	96	3.9	139	31	10.1	0.3	15	1.7	5	17.8	36.3	1.8	1.21	0.517	3.641	5.5	0.4	2	309	85	296	42	2.5	0.4	29.1	32.7	89	15.8	3.48	50	0
4.4	7.36	16	23	8.6	107	129	4.1	142	23.9	8	1	23	1.4	2.6	14.2	26.3	1.2	0.076	0	7.068	7.6	0	0	466	46	93	41	3.3	1.4	31.8	33.4	95	14.7	2.51	84	1
4.4	7.38	16	24	9.7	101	134	4.4	137	35.9	11.8	1.1	40	1.7	0.7	13.2	25.9	1.1	0.68	0.408	10.472	13.6	0	0	214	34	105	37	2.9	1.4	29.1	32.9	88	14.5	4.07	61	0
4.4	7.34	20	26	10.1	96	102	4.3	138	43	13.3	1.3	26	1.9	5.3	53.2	33.9	5.7	2.0196	0.3861	7.4349	9.9	0.3	0.4	189	25	106	36	4	2.1	30.6	30.8	99	17.8	4.33	83	0
4.4	7.34	23	20	7.5	106	219	5.2	144	37.7	12.7	3	56	1.9	5.5	13	24.3	1.1	1.757	1.004	21.586	25.1	0	0	279	25	68	36	3	0.2	30.3	33.7	90	16.3	4.2	79	0
4.4	7.16	13	16	8.1	119	210	4.4	144	23.1	6.7	1.8	51	1.8	3.3	16.3	69.4	1.7	0.22	0.33	3.465	5.5	0	0	300	7	49	34	1.8	1.3	28.1	29.2	96	16.1	2.4	83	1
4.4	7.34	18	25	8.7	107	492	5	145	39	12.8	2.8	87	3.1	3.3	15	23.4	1.3	1.2878	0.3562	11.9875	13.7	0.3	0.2	315	13	76	31	3.5	0.4	31.3	32.7	96	14.7	4.08	79	0
4.4	7.46	20	22	7.5	92	317	7.2	127	32.9	10.5	4.2	37	1.4	5.1	12.4	27.6	1	0.68	0.68	12.24	13.6	0	0	274	19	244	29	2.8	0.5	32.6	32	102	14.8	3.23	69	0
4.4	7.37	16	25	7.9	100	142	4	137	42.8	14.7	1.1	21	1.5	3.4	13.3	26.4	1.2	2.01	1.675	25.795	33.5	0	0	545	18	99	27	3.9	0.7	31	34.2	91	13.5	4.73	82	0
4.4	7.17	18	18	5.8	108	109	3.8	140	33.3	11.5	1.9	36	1.2	2.4	16.2	36.7	1.7	2.25	3.375	21	37.5	0	0	182	8	60	27	2.9	0.4	30.9	34.4	90	16	3.72	83	1
4.4	7.29	17	24	9.2	102	149	3.4	140	37.7	12.5	1.2	25	1.7	1.5	12.7	19.1	1.1	0.408	0.272	12.376	13.6	0	0	84	17	68	26	3.7	0.4	28.6	33	87	17.5	4.36	72	0
4.4	7.4	19	24	7.4	101	130	4	140	44.6	15.4	0.8	16	1.6	2.4	14.3	24.4	1.3	1.5504	0.4712	13.1024	15.2	0.2	0.2	276	32	68	25	3.9	1.7	31.5	34.6	91	13.4	4.9	77	0
4.4	7.4	13	23	6.8	105	125	3.3	138	39.7	13.5	0.9	20	1.3	0.8	13	26.9	1.1	0.26	0.04	1.56	2	0	0	151	15	42	18	2.7	0.3	31.4	33.9	93	13.6	4.29	69	0
4.4	7.38	17	23	6.4	107	95	3.4	144	39.8	13.3	2.6	29	1.5	3.7	14.5	42.8	1.4	3.4338	0.97	14.938	19.4	0.1	0.3	239	17	60	17	2.2	2.1	30.8	33.6	92	14.9	4.33	64	0
4.4	7.4	16	22	7.4	129	170	3.5	163	22.8	7.3	2.8	70	2.3	2	17.1	47.3	2	1.4362	0.2752	6.8198	8.6	0.1	0.7	114	12	69	17	2.5	0.4	32.3	32.2	100	13.6	2.27	82	0
4.4	7.29	24	16	10.4	98	659	6.5	131	34.9	11.8	1.8	88	3	5.4	14.4	21.3	1.4	0.6669	0.468	10.4481	11.7	0.2	0.8	703	41	134	13	2.9	0.5	32.1	33.8	95	13.9	3.68	64	0
4.4	7.45	19	25	8.3	113	616	4.6	152	33.7	10.1	0.9	33	2.2	3.8	11.9	19.4	1	1.1088	0.2464	9.7776	11.2	0.5	0.1	291	18	41	13	2.8	0.4	22.4	29.9	75	17.6	4.5	88	0
4.4	7.34	17	22	7.8	105	179	2.7	141	34.4	11.2	1.4	31	2.3	3.9	15.6	20.4	1.4	0.032	0	0.144	0.2	0	0	128	14	146	11	2.4	0.3	27.8	32.6	85	17.9	4.05	58	0
4.4	7.38	14	22	8.3	105	80	3.9	137	35.9	11.8	0.6	9	1.2	2.4	17.5	28.1	1.6	0.195	0.156	2.769	3.9	0	0	28	17	161	10	1.5	1.4	33.1	32.8	101	21.1	3.55	54	0
4.4	7.45	14	38	8	85	99	4.4	133	27.2	8.8	1.8	45	2.4	3.5	15.2	32.2	1.4	0.912	0.57	9.006	11.4	0	0	180	10	106	8	1.2	0.3	26.5	32.4	82	17.6	3.33	69	1
4.3	7.15	21	16	7	105	99	4.1	138	31.9	10	2.4	30	1.3	6.2	20	150	1.9	1.092	0	7.098	18.2	0	0	454	34	303	185	2.7	0.2	27.5	31.4	88	19.1	3.64	55	1
4.3	7.36	20	19	8.6	108	82	5.3	142	36.9	11.9	2.2	54	1.7	3.4	14.5	23.1	1.3	0.17	0.085	6.29	8.5	0	0	234	35	108	88	3.2	2	28.2	32.4	87	17.3	4.24	70	0
4.3	7.35	11	23	7.1	134	189	3.7	164	46.2	15.2	2.3	9	2.5	2.7	14.5	42.7	1.3	0.704	0.264	7.128	8.8	0	0	121	55	120	69	2.3	0.3	30.6	32.8	93	16	4.95	73	0
4.3	7.27	17	25	9.6	98	82	4.6	135	42.6	13.6	3.3	26	2	2.3	16.4	38.4	1.5	4.512	1.41	20.868	28.2	0	0	167	53	89	68	4.1	1.9	25.8	31.8	81	15.9	5.25	62	0
4.3	7.3	17	23	7.8	94	74	6.1	128	34.7	11.7	1.5	48	2.2	3.9	42.5	99.4	11.9	0.108	0.972	7.884	10.8	0	0	421	39	178	58	2.1	1.2	30.5	33.9	90	15.1	3.85	76	0
4.3	7.36	15	22	7.9	98	140	4.5	130	29.2	9.7	1.3	29	1.6	2.5	28	36.3	2.9	0.13	0.052	2.054	2.6	0	0	114	25	180	58	1.5	4.4	33.7	33	102	18.5	2.86	65	1
4.3	7.24	18	19	7.6	121	83	3.5	154	33.3	11.2	1.6	60	2.2	4.8	21	40.6	2	0.302	2.416	24.462	30.2	0	0	67	21	107	56	1.9	2.9	32.5	33.6	97	16.2	3.45	51	1
4.3	7.26	17	20	7.7	103	127	3.9	136	38.8	13.4	1.7	26	1.1	3.3	20.6	31.6	3	0.732	4.392	18.666	36.6	0	0	132	52	280	50	2.9	0.9	31.3	34.6	91	13.2	4.29	79	0
4.3	7.48	21	21	7.7	104	168	6.5	139	52.5	17.1	1.3	50	2.2	4	14.4	29.5	1.3	1.5281	1.554	22.7143	25.9	0.4	0	653	77	76	43	4	0.8	31.6	32.5	97	14	5.41	53	0
4.3	7.45	16	28	8.3	124	239	3.9	164	43	13.2	1.1	34	2.6	3.1	13.7	23.4	1.2	3.9725	0.4025	13.02	17.5	0.3	0.4	266	39	46	35	2.7	0.4	28.1	30.6	92	15.2	4.68	83	0
4.3	7.34	22	30	10	91	128	5.1	138	33.3	11.2	7.6	66	2	3	14.2	24.9	1.3	0.3144	0.1965	12.5236	13.1	0.1	0.3	165	14	44	32	2.6	0.3	34.8	33.6	103	16.1	3.22	62	0
4.3	7.34	14	25	8.1	97	207	4.4	132	23.9	7.1	0.8	6	1.3	2.6	15.6	150	1.7	0.8492	0.2316	18.1999	19.3	0	0.1	377	12	93	30	2.8	0.2	24.5	29.9	82	22	2.91	44	1
4.3	7.28	22	25	9.1	108	117	4.3	151	35.4	11.8	5.6	81	3.6	4	16.8	27.4	1.6	1.02	0.85	12.92	17	3	6	180	12	96	29	2.8	0.5	31.3	33.3	94	15.9	3.77	81	0
4.3	7.34	19	24	8.5	99	118	4.4	138	42.2	14.9	1.3	14	1.3	1.8	15.1	27.9	1.3	1.1407	0.4862	16.9983	18.7	0.3	0.1	267	38	70	28	3.9	0.7	27.4	35.2	78	12.2	5.43	32	0
4.3	7.37	18	21	8.2	104	231	3.9	139	36.8	12.7	1.3	21	1.3	2.4	13.9	25.7	1.3	0.189	0.0378	5.1516	5.4	0.2	0.3	89	22	41	28	2.9	0.7	32.3	34.6	93	13.7	3.95	78	0
4.3	7.34	14	29	8.1	95	82	3.8	134	27.1	9.2	0.3	18	1.9	2.7	11.9	25.6	1	0.825	0.22	4.125	5.5	0	0	243	23	113	23	1.9	0.5	33.9	34	100	17.6	2.71	81	0
4.3	7.28	16	25	6.5	100	150	4	137	37.8	12.2	1.1	22	1	2.7	13.1	25.9	1.1	0.552	0.552	6.164	9.2	0	0	218	18	47	23	2.9	1.5	29	32.2	90	12.9	4.19	44	0
4.3	7.31	15	27	7.3	101	197	4	139	45.9	15.7	1.3	21	1.4	1.4	11.2	24	1	0.945	0	2.135	3.5	0	7	172	17	45	22	4.4	0.4	30.8	34.2	90	13.4	5.1	83	0
4.3	6.98	34	23	6.6	92	1341	4.4	131	37.2	10.4	11.1	112	2.4	10.6	13.7	57.3	1.2	0.238	0.119	11.543	11.9	0	0	288	12	122	21	2.8	0.1	26.5	27.9	95	15.3	3.91	65	0
4.3	7.38	22	25	7.1	97	125	5.3	139	38.8	12.4	5.4	70	1.4	3.4	13.3	54.8	1.1	0.555	0.1887	10.3341	11.1	0.1	0.1	572	19	185	20	3	0.3	31.5	32	98	16.8	3.94	84	1
4.3	7.27	17	25	9.1	99	519	4.8	136	39.4	12.7	1.4	19	2.9	5.5	12.2	24.4	1	3.46	0.2941	13.2691	17.3	0.8	0.8	411	24	179	20	3.1	0.6	30.2	32.1	94	14	4.19	71	0
4.3	7.43	18	24	8.7	101	206	3.9	139	29.7	9.6	2.8	19	2.1	1.7	13.8	30.5	1.3	1.7512	0.7164	17.3329	19.9	0.3	0.2	371	8	99	19	2.7	0.5	31.6	32.2	98	17.2	3.02	74	0
4.3	7.44	11	36	8.1	97	114	4.1	140	29.9	10	1	20	2	3.7	13	30.7	1.1	1.5708	0.546	6.0984	8.4	0.3	1.8	266	9	86	17	3.1	0.3	26.8	33.6	80	15	3.74	69	0
4.3	7.34	17	24	10	96	153	4.1	133	37.3	12	2.4	32	1.4	3.4	15.1	25.5	1.5	4.5	1.8	13.05	22.5	0	0	378	14	62	15	3.7	0.6	30.5	32.1	95	15.1	3.92	71	0
4.3	7.38	18	25	7	103	151	4	142	42.3	13.5	2	27	1.3	3.6	13.3	25.1	1.2	0.335	0.3484	12.663	13.4	0.1	0.3	189	9	118	14	3	0.2	30.3	31.9	95	14	4.46	64	1
4.2	7.13	10	15	6	114	215	4.9	134	45.7	16.2	4.2	46	2.5	3.9	24.8	43.5	2.3	0.126	0.189	5.481	6.3	0	0	156	1044	69	1835	1.3	3.1	31.5	35.4	89	14	5.14	41	0
4.2	7.33	17	15	8.7	111	121	4	139	28.9	10.2	1.8	30	2.2	5.6	16.9	38	1.8	0	0	21.56	30.8	0	0	107	349	99	389	2.3	1.8	29.3	35.3	83	12.8	3.48	64	0
4.2	7.18	18	22	7.8	104	240	4.8	139	31.6	10.1	3.7	50	1.9	4.9	15.5	40	1.5	1.575	0.42	8.505	10.5	0	0	51	104	125	161	2.9	1.1	30.6	32.1	96	16.3	3.3	63	1
4.2	7.36	18	20	8.2	113	73	3.5	147	33.4	11.2	1.3	48	2.4	3.6	21.4	40.1	2	0	0.648	13.932	16.2	0	0	121	33	112	89	1.9	2.9	31.7	33.5	94	17.6	3.54	63	1
4.2	7.4	16	22	8.8	117	264	4.5	150	42.9	13.9	1.3	42	2.4	2.7	13.8	24.9	1.2	1.539	0.8748	13.6404	16.2	0.6	0.3	464	41	121	66	2.7	0.4	25.3	32.5	78	17.1	5.51	81	0
4.2	7.41	19	23	8.4	96	149	3.8	134	36.1	10.7	0.7	7	1.3	3.2	15.7	26.8	1.6	0.2674	0.2865	18.527	19.1	0	0.1	192	27	232	64	3.1	2.8	21.4	29.8	72	17.3	5.02	31	0
4.2	7.34	18	22	7.3	113	143	5.6	147	19.6	6.3	2.3	61	2	5.4	17.4	30.4	1.6	2.072	0.74	10.508	14.8	0	0	257	37	82	63	3	0.7	30	32	94	16	2.09	88	0
4.2	7.38	19	27	8.2	101	109	3.5	143	46	15.7	1.3	28	1.3	2	13.5	19.3	1.2	0.384	0.032	1.104	1.6	0	3	170	53	154	47	2.9	0.6	29	34.2	85	15.6	5.43	67	0
4.2	7.32	15	21	8	101	116	5	132	28.8	9.8	1.4	45	2.1	2.6	11.3	23.7	0.9	0.18	0.018	2.613	3	0.6	5.7	9	24	68	43	3.8	0.2	32	33.9	94	15	3.06	80	0
4.2	7.45	20	25	8.9	92	122	6.5	130	28.3	9.9	2.4	47	2	3.3	16.6	36.3	1.5	1.08	0.72	32.4	36	0	0	352	30	119	33	2.9	0.4	31.4	34.9	90	14.2	3.15	63	0
4.2	7.22	13	28	7.4	106	120	3.9	143	36.4	11.4	1.4	68	2.4	3.8	18.1	150	1.6	0.6693	0.345	5.8581	6.9	0.1	0.2	209	8	54	26	2.5	1.1	29.9	31.3	96	18.1	3.81	64	1
4.2	7.33	18	22	8.1	134	145	4.3	170	33.7	11.3	2.2	104	2.8	5.9	15.4	41	1.3	0.87	0.2088	7.5864	8.7	0.1	0.3	134	29	91	22	2.6	0.4	34.3	33.4	103	16.1	3.29	64	1
4.2	6.93	32	6	8	91	923	7	122	28.9	7.9	5.7	106	3.1	9.2	16.1	41.5	1.8	0	0.639	20.661	21.3	0	0	455	11	153	18	2.7	0.2	27.3	27.3	100	14.7	2.88	42	0
4.2	7.34	21	25	10.8	98	152	3	141	33	10.5	10.3	38	1.7	6.8	13.2	26.5	1.2	2.7606	0.5676	9.3912	12.9	0.1	1.3	394	7	91	17	2.8	0.4	28.9	31.9	90	16.5	3.64	70	0
4.2	7.41	20	19	7.7	108	191	4.1	143	33.1	10.3	1.5	48	1.9	4.9	13.3	22.7	1.2	21.792	16.344	0	45.4	0	16	476	12	125	17	2.8	0.2	27.8	31.3	89	17.4	3.72	58	0
4.2	7.35	11	22	8.1	105	133	3.5	134	32.6	10.7	1.2	15	1.8	2	13.5	25.1	1.2	0.8967	1.3524	12.3627	14.7	0.4	0.2	710	12	149	12	2.6	0.4	29.9	32.9	91	14.5	3.59	59	0
4.1	7.33	18	22	8.9	98	82	3.7	134	46.7	15.5	2	22	1.5	1.4	13.3	29.6	1.2	0.064	0.256	5.248	6.4	0	0	178	222	55	184	3.8	0.9	32	33.2	96	12.5	4.85	50	0
4.1	7.01	28	14	7.6	94	71	3.6	132	38.5	12.7	5.9	76	1.6	6.2	13	27.9	1.1	0.232	0.232	7.308	11.6	0	0	202	39	111	149	1.3	0.6	28.9	33.1	87	16.3	4.4	46	0
4.1	7.4	21	28	10.9	101	123	5.9	144	41.3	13.8	1.7	89	3	4.2	13.9	32.4	1.2	1.287	0.702	21.2472	23.4	0.1	0.5	422	75	135	114	3.5	0.4	29.7	33.4	89	15.7	4.65	59	0
4.1	7.3	17	23	7.3	105	193	3.8	141	34.1	11.4	1.8	52	1.9	2.4	14.4	32.4	1.3	2.96	0	14.06	18.5	0	0	353	65	88	91	2.3	0.4	29.9	33.4	89	17.6	3.81	83	0
4.1	7.43	17	21	7.6	103	222	4.8	136	43.7	14.8	1.4	34	1.7	2.8	14	28.2	1.3	0.324	0.324	12.798	16.2	0	0	225	55	123	84	2.9	1	35	33.9	103	13.7	4.23	84	0
4.1	7.03	21	22	9	95	129	6.5	131	25.4	8	2.4	50	1.9	5.6	28.4	46.8	5.3	0.498	0.747	23.406	24.9	0	0	775	34	224	71	3.1	1	27.5	31.7	87	17.1	2.93	79	1
4.1	7.36	14	27	8	99	200	4.3	136	33.6	10.8	1.1	16	2.3	3.2	31.9	38.4	3.3	0.9881	1.1327	21.9069	24.1	0.2	0.1	263	52	89	67	3.1	0.5	24	32.2	74	14.3	4.52	62	0
4.1	7.27	24	24	7.5	114	237	6.2	156	42.4	13.6	4.2	80	2.6	5.8	16.7	40.2	1.5	2.079	2.079	18.018	23.1	0	0	812	26	171	54	3.9	0.6	28.4	32	89	15.1	4.79	69	0
4.1	7.41	22	27	9.1	95	160	4.7	139	34.4	11.3	4.7	35	1.8	2.6	14.8	25	1.3	1.32	0.825	11.715	16.5	0	0	92	14	63	43	3	1.2	31.1	32.9	95	17.3	3.64	82	0
4.1	7.34	21	22	10	102	160	5.5	139	29.5	9.1	0.6	20	1.8	2.9	23	32	3.5	0.8932	0.6496	18.6557	20.3	0.2	0.3	601	15	77	43	2.6	0.2	30.3	30.9	98	14.2	3.01	64	0
4.1	7.47	19	24	8.3	98	125	4.8	136	31.4	10	3.5	61	1.7	3.3	14.8	35.6	1.3	0.183	0	5.49	6.1	0	0	69	27	183	33	2.6	0.5	32.2	32	101	17.9	3.12	80	0
4.1	7.46	18	18	8.5	97	130	6.5	126	25.7	8.3	1.9	69	2.2	3.7	19.1	43.8	1.8	0.78	0.39	6.63	7.8	0	0	130	13	116	32	2.3	1.2	35.2	32.2	109	25.2	2.36	80	0
4.1	7.25	18	22	9.1	103	150	3.8	139	35.3	11.7	0.8	13	2.2	3.5	12.7	23.9	1.1	0.8568	0.2652	9.0474	10.2	0.1	0.2	266	25	69	27	2.9	0.4	34	33.1	103	12.3	3.43	64	0
4.1	7.33	25	23	7.9	101	149	4.6	144	53.9	16.9	4.7	33	1.6	5.7	16	26.1	1.4	0.444	0.444	20.868	22.2	0	0	208	13	89	23	2.9	0.5	28.6	31.4	91	19.5	5.91	82	0
4.1	7.37	21	20	9.3	101	166	4.5	137	35	11.4	2.3	36	2.2	2	11.9	27.7	1	0.387	3.483	34.83	38.7	0	0	289	15	87	21	3.2	0.5	27.5	32.6	85	18.2	4.14	83	0
4.1	7.53	18	25	8.8	107	238	4.9	145	30.9	9.4	4.4	77	2.1	1.7	15.7	31.9	1.6	1.1172	0.4123	11.5045	13.3	0.2	1.7	208	8	181	21	2.9	0.5	28.9	30.3	95	17.2	3.24	52	0
4.1	7.29	18	21	7.2	102	190	4.6	136	33.5	11.5	2.1	34	1.8	5.3	23.3	31.2	2.3	0.19	0.19	1.938	3.8	0	0	281	15	38	18	2.4	0.9	31.1	34.3	91	15.8	3.69	72	0
4.1	7.34	19	21	7.7	95	221	3.9	131	30.2	10.7	1.7	23	1.7	1.4	14.2	27.3	1.3	0.375	0.75	9.875	12.5	0	0	208	16	50	17	3.3	0.6	28.2	35.6	79	14	3.81	65	0
4.1	7.34	15	24	9	104	256	4.3	139	35	11.1	1.4	32	1.8	2.4	11.6	32	1.1	0.2304	0.0648	6.8832	7.2	0.1	0.3	158	17	45	15	3.6	0.8	27.6	31.6	88	14.3	4	80	0
4.1	7.34	19	22	9	106	144	3.8	143	35.9	12.4	0.9	24	1.8	3.9	13	25.4	1.1	0.5664	0.192	8.7936	9.6	0.2	0.2	275	14	67	14	2.3	0.7	29.5	34.6	85	14.4	4.21	61	0
4.1	7.46	18	24	8.8	95	746	4.8	132	39.6	12.9	2.9	46	2.2	1.8	12.6	24.9	1.1	0.723	1.205	19.039	24.1	0	0	282	15	106	12	3.1	0.4	30.9	32.6	95	13.7	4.18	85	1
4	7.38	17	21	7.4	111	83	3.5	145	34	10.7	1.1	27	1.4	3.9	14.1	25.9	1.3	0.229	0	20.61	22.9	0	0	220	471	141	1200	2.6	0.6	28.1	32	88	16.5	3.8	79	0
4	7.37	19	24	7.3	97	276	5.9	134	30.6	9.9	1.1	38	1.9	2.7	13.3	26.4	1.1	0.225	0.15	6.6	7.5	0	0	66	50	320	187	2.2	0.7	26.1	32.3	81	18.8	3.79	58	0
4	7.42	28	17	8.5	98	140	9.7	133	31.8	9.3	9.9	47	2.8	3.4	14.3	30.6	1.2	0.9657	0.2331	9.8346	11.1	0.3	0.5	208	73	149	112	2.9	1.3	29.3	29.2	100	17	3.17	53	0
4	7.36	19	22	10.1	89	214	4.1	126	45.3	15.3	3.5	90	2.7	3.2	13.4	26.3	1.2	0.7224	4.5192	11.4744	16.8	0.3	0.1	34	35	281	58	3	3.2	29.9	33.8	89	14.9	5.12	60	1
4	7.38	19	22	9.8	101	97	5.1	137	34.8	10.1	1.1	15	1.7	3.3	12.5	18.9	1	3.587	1.1183	16.0993	21.1	0.4	1	608	25	79	58	4.3	0.6	22.8	28.9	79	17.3	4.41	52	0
4	7.44	21	20	6.4	104	237	7.5	137	33	10	1	35	2.5	1.8	12.6	24.7	1.2	1.28	0.224	1.376	3.2	0	1	320	26	122	57	2.7	0.6	32	30.2	106	18.2	3.11	82	0
4	7.4	16	20	7.7	101	87	3	134	35.5	12.3	1	13	1.4	1.3	19.5	150	2.5	0.222	0.222	7.659	11.1	0	0	260	43	149	54	2.9	0.6	30	34.7	87	14.2	4.11	61	0
4	7.32	19	19	9.7	101	164	5.8	133	32.7	11.7	1.2	30	1.5	2.7	11.9	27.8	1	0.469	0.067	4.757	6.7	0	1	241	20	62	50	4.2	0.4	31.1	35.7	87	13.1	3.75	62	0
4	7.34	24	15	6.6	102	147	6.3	135	33.5	11.2	1.2	49	1.9	2.3	13.6	21.4	1.2	0.202	0.606	18.786	20.2	0	0	407	59	307	49	3.3	0.5	28.9	33.5	86	17.6	3.88	76	1
4	7.23	16	17	8.3	106	124	5.6	133	23.7	7.6	2.2	57	2.4	4.5	15.9	50.5	1.4	1.665	1.11	49.95	55.5	0	0	156	24	359	48	2.6	0.7	31.5	31.9	99	16.3	2.4	85	1
4	7.41	24	31	9.1	92	183	6.9	140	39.1	12.2	7.5	43	2.2	3.1	13.7	28.6	1.2	0.2	0.8	8.8	10	0	0	199	22	108	46	4.7	0.5	32.5	31.1	104	14.4	3.75	77	0
4	7.36	18	22	7.5	111	154	3.7	147	44.4	15.4	1.9	46	1.6	2.8	14.3	29.5	1.4	0.78	0.026	0.39	2.6	0	0	183	47	55	46	2.9	0.9	33.2	34.6	96	13.7	4.64	79	0
4	7.41	18	24	10.2	105	357	6.2	141	39.7	13.2	0.8	44	2.1	2.6	13.3	39.3	1.2	2.139	0.069	4.416	6.9	0	0	216	25	207	43	3.4	0.4	36.7	33.1	111	21.7	3.58	82	0
4	7.44	23	20	9.4	91	332	6.7	127	34.4	11.3	1.2	25	2	3.2	13.8	26.6	1.2	0.7216	0.41	15.17	16.4	0.2	0.4	408	23	80	40	3.9	0.8	24.2	32.8	74	14.3	4.67	53	0
4	7.36	22	26	8.4	98	205	4.6	141	29.7	9.1	3.5	53	2.5	4.9	32.1	60	3.3	1.7556	0.5016	10.8768	13.2	0.4	0.2	415	46	211	39	2.6	0.2	27.8	30.6	91	17.7	3.27	76	0
4	7.4	15	23	8.1	105	190	4	139	31.3	10.8	0.8	22	1.3	3.6	22.2	39.7	2.2	0.56	2.24	21	28	0	0	271	33	82	39	2.8	0.9	30.6	34.5	89	17	3.53	87	1
4	7.4	20	18	7.8	88	266	4.4	122	27.6	9.3	0.4	22	1.8	3.7	13.1	28.2	1.1	0.255	0.255	24.99	25.5	0	0	219	17	85	28	2.9	0.7	29.9	33.7	89	16.2	3.1	86	1
4	7.46	22	20	7.3	90	130	3.7	128	34.3	12.1	1.2	17	1.1	2.7	15.1	28.7	1.5	0.284	0.142	6.035	7.1	0	0	142	32	122	27	3.8	0.5	34.1	35.3	97	19	3.55	45	0
4	7.35	20	18	7	99	115	4.2	133	36.9	12.5	2.3	37	1.5	2.2	17.2	33	1.5	0.42	0.42	9.1	14	1	0	166	22	56	27	3.5	0.7	29.1	33.9	86	14.1	4.3	50	0
4	7.36	21	21	8.5	103	137	7.4	138	38	11.8	1.7	25	1.9	3.9	21.3	57.6	2.1	0.68	0.85	5.78	8.5	0	3	215	20	35	26	2.7	0.8	34.1	31.1	110	22.4	3.46	42	0
4	7.43	16	16	6.4	130	254	3.5	158	40.8	13.1	4.6	75	3.2	2.2	18.2	33.7	1.7	1.045	0.627	16.093	20.9	0	0	171	14	104	26	2.3	0.6	28.9	32	90	13.5	4.52	64	0
4	7.41	25	20	8.2	93	77	3.6	134	36.7	11.7	2.4	72	1.9	5.1	15.8	42.4	1.7	0.183	0.183	11.346	18.3	0	0	232	12	92	24	2.8	0.5	31	31.9	97	15.7	3.78	76	0
4	7.35	21	21	9.1	99	110	4.2	137	44.9	15.9	0.9	14	1.7	3.5	13.5	27.5	1.2	0.492	0.328	14.268	16.4	0	0	208	23	48	21	3.1	1	32.9	35.5	93	13.2	4.85	80	0
4	7.33	15	31	8.3	99	482	5	140	31.2	10	1.5	87	1.9	2.9	14	26.9	1.2	1.334	0.464	12.644	14.5	0.3	0	319	21	153	21	3.1	0.3	27.6	32.2	86	18.7	3.63	82	0
4	7.43	20	21	8.5	97	114	3.6	134	34.2	11.6	1.4	39	1.2	2.8	31.5	46.8	6.6	0.6549	0.4425	16.3548	17.7	0.2	1.3	207	7	71	16	2.9	1.1	29.9	33.9	88	13.8	3.88	88	0
4	7.36	14	27	7.1	103	131	3	141	39.5	13.7	2.7	48	1.5	3.2	15	34.3	1.4	0.624	0.78	4.836	7.8	0	0	154	13	33	16	3	1.9	31.1	34.7	90	13.6	4.4	70	1
4	7.39	17	22	7.5	105	98	3.7	140	42.8	13.7	0.6	16	1.5	2.7	13.4	33.4	1.1	1.7836	0.3276	33.7064	36.4	0.3	1.3	790	7	129	16	2	0.5	29.9	32	94	13.7	4.57	64	0
4	7.51	21	23	9.4	99	94	4.6	138	31.5	10	2.3	36	1.8	2.9	20.8	32.5	2	0.78	0.81	28.35	30	0.1	0.1	285	9	49	15	3.3	1.1	28	31.8	88	16.9	3.58	87	0
4	7.37	18	20	9.9	102	174	4.3	136	40.5	13.7	1.3	19	2.4	3.3	11.8	23.8	1	1.4948	0.3848	12.876	14.8	0.1	0.1	337	10	97	11	3.7	0.3	25.9	33.7	77	18.3	5.27	82	0
3.9	7.34	17	22	7.9	100	69	4.4	135	28.9	9.6	5.8	45	2	6.5	46.1	62.1	5.2	0.784	0.392	18.424	19.6	0	0	31	303	132	1155	2.2	12.4	36.1	33.1	109	25.7	2.65	48	1
3.9	7.28	22	16	9.2	105	190	5.1	138	32	9.7	3.2	83	1.5	4.2	14.4	27.1	1.4	0.875	0.7	15.4	17.5	0	3	310	123	72	274	3	0.4	26.1	30.3	86	18.4	3.7	88	0
3.9	7.3	19	16	7.5	97	90	5	127	32.6	11.4	0.8	79	2.3	4.6	16.4	31.7	1.4	1.421	0.049	2.254	4.9	0	0	60	94	602	162	2.5	0.6	30.9	35	88	16.7	3.69	28	1
3.9	7.35	16	17	7.7	105	131	4.4	134	25.7	8	1.3	50	2.1	2.5	16.5	28.1	1.5	1.128	0.7191	12.2247	14.1	0	0.1	300	59	320	93	2.6	1.3	24.3	31.1	78	17.3	3.28	81	0
3.9	7.09	17	15	7.3	116	233	4.3	144	43.4	15.1	1.6	46	3	6.4	16.5	38.7	1.5	1.008	0.252	1.296	3.6	1	0	129	66	47	75	2.7	0.5	30.1	34.8	86	14.5	5.03	81	1
3.9	7.51	17	22	6.9	94	108	4.3	129	37.7	12.8	1	32	1.8	3.7	13	26.3	1.1	0.7735	1.4651	6.7522	9.1	0.1	1.1	353	28	69	66	1.8	0.9	30.5	34	90	13.1	4.19	39	0
3.9	7.24	21	25	7.6	104	165	3.4	147	40.1	13.5	1.5	21	1	2.4	14.7	23	1.4	0.476	0.068	5.372	6.8	0	0	218	28	133	66	3.3	0.4	30.4	33.7	90	15.1	4.44	83	1
3.9	7.26	15	18	6.8	119	93	3.7	148	26.6	8.9	0.7	22	1.3	1.7	39.5	54	10.3	0.184	0.092	11.2125	11.5	0.1	0.2	158	33	115	57	3.2	1.1	33.9	33.7	101	16.8	2.64	50	0
3.9	7.38	20	22	9	109	95	6.1	145	32.6	11.1	2.3	57	2.2	3.4	12.5	25.9	1.1	1.631	0.233	19.106	23.3	0	0	236	16	88	55	2.8	0.4	30.6	33.9	90	15.2	3.62	73	0
3.9	7.4	21	28	7.8	89	112	4.5	133	39.1	12.7	5.3	50	1.6	4.7	16.5	27.3	1.5	0.8436	0.4144	13.4976	14.8	0	0.3	138	20	177	37	2.9	1	29	32.4	90	17.5	4.37	82	0
3.9	7.38	18	20	6.4	104	37	4	138	27	8.9	1.1	15	1.6	2.8	18.3	29.9	1.7	1.804	0.902	83.886	90.2	0	1	264	21	252	37	1.8	0.2	29.4	33.1	89	14.9	3.03	47	0
3.9	7.25	10	31	7.7	100	90	4.5	136	26.9	9	2.3	48	2.8	3.7	12.8	27.4	1.1	0.1368	0.0798	3.5682	3.8	0.1	0.4	200	27	197	36	2.3	0.3	32.3	33.4	97	13.8	2.79	84	1
3.9	7.36	20	26	7.3	118	194	5	159	38.9	12.4	1.5	106	2.3	3.3	12.6	20.8	1	0.88	1.1	17.6	22	0	0	493	40	70	35	2.2	0.3	30.3	34.7	95	14.9	4.1	64	0
3.9	7.34	17	35	7.8	92	124	3.6	140	36	12	2.4	24	1.6	2.9	13.2	27.2	1.1	0.603	1.005	17.487	20.1	0	0	138	19	104	33	3.3	0.8	33.3	33.5	99	16.7	3.62	84	1
3.9	7.38	21	19	10.1	103	119	4.4	139	41	14.5	0.7	16	2.2	3	11.4	20.7	1	1.518	0.264	14.586	16.5	0.2	0.5	353	21	74	32	4.6	0.3	30.4	35.2	86	13.7	4.77	55	0
3.9	7.4	15	15	7.3	110	99	3.6	136	19.9	6.9	0.9	22	1.8	2.2	15.2	39.9	1.4	0.4636	0.1976	6.9084	7.6	0.1	0.3	139	19	59	27	2.7	0.3	27.7	34.7	80	23.6	2.49	62	0
3.9	7.24	18	25	7.9	106	470	3.9	145	34.1	11.4	1	26	1.9	3.9	23.4	49.7	2.3	1.032	0.516	14.964	17.2	0	0	223	9	140	24	2.9	0.4	27.2	33.4	82	15.8	4.18	73	0
3.9	7.29	11	22	8.1	103	146	3.7	132	26.4	8.5	0.5	10	1.9	3.2	15.9	34.1	1.4	1.935	1.505	17.63	21.5	0	1	536	12	225	23	1.7	0.2	29.7	32.3	92	17.6	2.87	66	0
3.9	7.5	22	25	11.3	127	135	5.5	168	45.7	13.9	3.6	71	3.2	5	17.5	24.7	1.6	1.6874	0.3432	12.0406	14.3	0.3	1.4	380	27	223	23	2.9	0.5	29	30.5	95	15.1	4.8	80	0
3.9	7.33	14	33	7.9	96	121	2.4	141	37	11.6	3.5	26	1.3	1.7	12.5	22.1	1	0.5184	0.1872	13.5792	14.4	0.1	0.8	391	11	137	22	2.3	0.3	35.6	31.3	114	17.5	3.25	81	1
3.9	7.34	16	24	7	101	114	3.4	138	41.3	14.8	0.6	14	1.2	3	13.5	24.5	1.2	0.195	0.105	0	0.3	0	0	140	35	88	22	2.7	0.6	32.1	35.8	90	13.9	4.61	61	0
3.9	7.34	17	19	8.7	104	115	3.7	136	30.2	8.6	1.3	16	1.4	2.1	13.1	22.2	1.1	0.062	0.124	5.27	6.2	1	0	298	14	75	22	2.9	0.8	20.1	28.7	70	26.2	4.29	44	0
3.9	7.34	16	36	12.6	83	193	3.9	131	42.7	14.7	2.4	35	2.2	5.3	11.1	21	0.9	0.9675	0.4902	11.4036	12.9	0.1	0.2	204	30	70	20	4.5	0.6	31.9	34.4	93	16.9	4.61	51	0
3.9	7.38	18	26	8.9	101	106	4.8	140	39.6	13.8	1.1	16	2.5	5.6	12.1	29.3	1.1	0.336	0.896	9.52	11.2	0	0	138	15	67	20	3.6	0.7	29.8	34.8	85	16.1	4.64	62	0
3.9	7.54	16	29	7.6	96	279	4.3	137	30.3	10	1.9	26	1.7	3.6	15.5	28.2	1.5	1.76	0.16	12.48	16	0	0	413	12	92	18	2.1	2	29.5	32.9	90	12.2	3.38	72	1
3.9	7.39	17	25	10	97	147	4.2	135	23.9	8.8	1	35	1.7	2.8	15.7	34.8	1.4	1.17	0.013	0	1.3	0	0	40	22	112	18	3.7	0.7	31.7	36.7	86	14.5	2.77	49	1
3.9	7.16	14	17	5.3	112	127	4.3	139	32.3	10.4	1.8	33	1.5	3.2	19.3	34.8	2.6	0.5229	0.2988	24.0285	24.9	0.2	0	285	6	69	16	1.5	0.2	29.8	32.2	93	16.2	3.5	76	1
3.9	7.42	23	28	9.4	94	131	5.2	140	36.4	12.9	6.9	55	1.8	3.4	17.7	28.4	2.2	0.468	0.312	6.318	7.8	0	0	127	13	84	15	3.8	0.6	33.5	35.5	95	15.9	3.86	62	0
3.8	7.22	19	20	7.5	93	268	4.2	128	31.4	10.4	3.1	50	2	4.6	25.8	39.5	2.6	0.166	0.581	6.889	8.3	0	0	149	4675	117	11340	3	2.1	30	33.2	90	14.5	3.47	76	0
3.8	7.34	17	16	7.2	110	121	4.3	139	20.4	6	1.4	35	1.9	4.2	14.9	24.1	1.3	1.0395	0.2646	17.577	18.9	0.1	0	292	121	551	245	1.6	6.3	25.2	29.3	86	21.2	2.37	81	0
3.8	7.34	16	19	8.4	108	100	4.6	138	34.7	11.8	1.6	22	1.4	4.3	14.1	32.1	1.3	1.378	0.3705	4.576	6.5	0.9	1.8	122	120	110	219	2.8	1	34.8	34.1	102	15.7	3.39	47	1
3.8	7.37	23	15	9.2	84	373	5.1	117	32.2	11.3	5	92	3.7	6.5	24.9	71.2	2.1	0.7676	0.6767	8.6254	10.1	0.1	0.2	90	137	127	137	3.1	42.9	41.5	35	119	18.3	2.72	44	1
3.8	7.3	16	17	6.9	113	66	3.3	143	28.9	9.9	1	17	2.2	0.8	17.2	34.2	1.6	1.04	0.26	12.74	26	0	1	166	112	310	103	2.5	5.9	29.7	34.3	87	15	3.34	66	0
3.8	7.34	22	22	9.9	99	144	5.7	137	49.1	16.4	2.4	32	2.6	4.9	13.8	30.9	1.3	5.418	0	23.779	30.1	0	0	277	38	109	77	3.4	0.8	30.5	33.4	91	13.4	5.39	64	0
3.8	7.39	17	22	8	93	119	3.1	129	42.2	14.6	1.7	42	2.2	6.1	29.1	47	3	1.5249	2.1658	18.3209	22.1	0.4	0	72	49	143	74	2.4	30.4	37.9	34.5	110	16.3	3.85	43	1
3.8	7.25	18	19	7.4	105	135	4.7	137	41.4	14.1	1.5	22	1.7	2.7	12.3	31.7	1	0.133	0.247	0.893	1.9	0	0	152	24	37	69	1.4	0.8	29.2	34	86	13.3	4.82	38	0
3.8	7.33	15	25	8.9	97	102	3.6	133	29.8	9.9	1	15	1.1	2.3	15.9	34	1.4	0.7038	0.2754	9.129	10.2	0.3	0.6	224	29	150	68	3.4	2.4	29.2	33.3	88	17.4	3.4	61	0
3.8	7.32	13	18	7.4	113	104	2.9	141	43.9	14.9	0.8	10	1.6	1.8	16.1	36	1.5	0	0	5.8144	7.9	0	0	61	40	131	57	3	4.2	37.6	34	111	16.2	3.97	44	0
3.8	7.42	19	23	10.1	98	255	5.6	134	34.9	11.2	1.1	17	1.8	2.8	12.1	27	1	0.7332	0.0546	6.9342	7.8	0.1	1	402	32	101	49	3.3	0.4	30.5	32.1	95	15	3.69	77	0
3.8	7.52	19	18	9	111	107	5.5	142	34.3	10.7	2	49	1.5	3.3	14.6	30.8	1.4	1.48	0.555	12.95	18.5	0	0	219	36	437	44	3.2	1	22.4	31.2	72	17.9	4.77	64	0
3.8	7.28	18	20	7.8	105	53	5	138	32.2	9.5	1.3	41	1.5	3.4	16.4	34.6	1.8	0.57	0.19	7.41	9.5	2	0	184	16	167	37	2.9	2	25.2	29.6	85	16	3.78	56	1
3.8	7.46	19	29	8.6	93	121	4.4	137	34.3	11.2	3.3	12	1.7	2.7	13.2	27.9	1.2	0.46	0.345	10.58	11.5	0	0	148	19	726	36	4.3	0.7	39.1	32.6	120	14.5	2.86	51	0
3.8	7.27	16	24	8.4	103	264	4.7	138	43.9	14.6	2	30	2.5	5.3	11.2	24.5	0.9	1.7767	0.2289	8.72	10.9	0.3	1.2	229	22	119	33	3.8	0.3	29	33.3	87	15.3	5.04	64	0
3.8	7.34	16	22	7.5	103	327	4.1	137	23.8	7.9	1.3	47	2	3.4	12.9	23.8	1.1	0.344	2.537	0.731	4.3	0	0	40	17	58	31	2.9	0.6	30.4	33	92	16.2	2.59	76	0
3.8	7.41	16	27	6.9	98	138	3.6	137	41.2	13.6	0.9	22	1.9	2.7	16.4	40.3	1.5	2.044	1.022	9.636	14.6	0	0	131	9	201	30	1.9	1.3	32.4	33	98	15.9	4.2	67	0
3.8	7.36	20	25	9.7	94	197	4.3	135	33	9.7	4.4	20	1.5	3.1	22	150	3.1	0.728	0.728	32.396	36.4	0	0	687	15	149	28	2.9	0.5	27.5	29.5	93	16.5	3.53	39	0
3.8	7.29	20	20	6.8	96	284	4	132	30.1	10.2	6.9	58	1.8	5	15.1	72.3	1.3	1.2784	0.4488	4.4132	6.8	0.7	9.1	181	10	101	27	2.9	0.4	28.7	33.8	85	16.6	3.54	54	0
3.8	7.44	21	21	7.4	108	94	4.1	146	35.8	12.2	0.8	23	1.4	2.9	12.6	23.2	1.1	0.66	0.03	2.22	3	0	1	201	12	107	23	4	0.4	30.9	34	91	18	3.94	76	0
3.8	7.45	17	21	7.5	99	139	4.8	132	33.6	12	2.1	26	1.5	2.1	19.3	38.3	1.8	0.345	0.345	10.235	11.5	0	0	112	22	51	22	3.2	0.9	30.9	35.6	87	13	3.88	39	0
3.8	7.35	19	24	7.3	107	130	3.9	146	44.2	15	1.2	18	2	1.4	12.3	25.8	1.1	2.0554	0.2838	6.106	8.6	1	0.8	174	12	74	22	3.1	0.3	33.1	33.8	98	14.4	4.52	64	0
3.8	7.27	17	22	8	114	216	4.5	148	26.1	7.7	1.8	44	1.6	6	29.5	51.6	3.1	0.279	0.558	22.32	27.9	0	0	461	13	238	19	2.5	0.4	28.4	29.7	96	17.7	2.72	71	0
3.8	7.34	20	25	7.1	113	98	4.9	153	43	13.4	2.9	89	2.1	4.2	13.8	25.7	1.2	1.5407	0.6727	19.0743	21.7	0.4	1.3	323	13	110	18	2.6	0.4	24.7	31.2	79	18.9	5.41	84	1
3.8	7.33	16	21	7.7	96	281	4.1	129	30.5	10.4	1	20	1.1	1.9	14.1	30.3	1.3	0.8924	1.0864	17.3048	19.4	0.2	0.5	231	13	72	16	3.7	0.3	29.5	34	87	14.8	3.51	82	0
3.8	7.27	18	25	8.6	95	112	8.4	130	32	10.4	1.3	16	2.1	3.2	32.6	28.8	3.4	1.055	1.899	15.614	21.1	0	0	408	11	48	15	2.5	0.5	27.8	32.5	86	14.4	3.74	85	0
3.8	7.34	18	25	6.6	99	136	3.8	138	36.1	12.7	0.9	6	1.3	2.9	14.6	34	1.3	0.7776	0.2052	9.7956	10.8	0.1	0.1	275	8	49	14	2.7	0.2	32	35.2	91	13	3.98	31	0
3.7	7.31	18	17	8.2	111	68	4.7	141	40.3	13.1	2.2	48	1.9	4.4	15.8	34.3	1.6	0.462	3.234	37.884	46.2	0	0	70	526	131	534	2.7	0.8	30.3	32.4	94	15.5	4.31	88	0
3.7	7.34	23	25	8.8	89	200	4.8	132	35.2	10.6	1.6	36	2.2	4.1	60.7	59.3	7.2	0.6771	0.4331	4.9654	6.1	0.2	0.2	408	350	137	451	3.2	1.7	25	30.1	83	15.6	4.23	66	0
3.7	7.47	20	22	8	116	491	4.1	154	43.6	12.8	1.1	70	2.3	2.7	35.5	31.9	3.5	1.2903	1.1638	22.7447	25.3	0.2	0.3	273	73	149	112	2.9	1.3	20.9	29.4	71	18.2	6.14	66	0
3.7	7.25	18	27	9.9	100	167	4.5	140	44.9	14.8	1.2	27	2.1	3.9	10.7	29.3	1	0.5916	0.1044	10.8228	11.6	0.2	0.4	229	61	176	84	4	0.7	30.6	32.9	93	13.9	4.83	65	0
3.7	7.44	11	29	8.1	96	115	2.3	134	27.5	9.1	0.9	8	1.6	2.5	20.1	54	1.9	0.936	0.468	4.914	7.8	0	0	131	99	206	63	1.4	2.3	33.2	33.1	100	21.7	2.74	51	1
3.7	7.44	18	24	10.1	99	264	5.4	136	34.3	11.3	2.7	111	2	4.5	16.4	25.3	1.4	2.4963	0.4396	12.5286	15.7	0.3	1.3	163	51	112	51	3.9	0.7	29.5	33	90	17.1	3.82	70	0
3.7	7.49	19	24	7.3	100	164	4.6	138	29.6	9.3	3.5	123	2	3.6	15.3	31.1	1.5	0.287	0	24.969	28.7	0	0	351	35	94	51	2.7	0.5	27.7	31.6	88	14.6	3.38	85	1
3.7	7.42	15	22	8.2	91	93	6.6	121	30.3	9.9	1.5	48	2	5.1	17.8	36.2	1.6	0.546	0.078	5.148	7.8	0	1	61	22	273	50	2	4	31.4	32.6	96	18.2	3.15	52	0
3.7	7.38	19	28	8.8	93	147	4	136	37	12.9	2.1	34	2.1	3.4	13.3	28.4	1.1	1.104	0.8832	11.7714	13.8	0.2	0.1	264	20	56	45	3.8	0.6	29.3	34.8	84	13.9	4.38	68	0
3.7	7.37	15	22	7.3	105	141	5.4	137	36.5	12.3	0.7	12	1.4	2.4	14.8	29.2	1.3	1.1725	0.0245	2.219	3.5	0.9	1.6	317	16	77	41	4.1	0.5	30.4	33.7	90	13	4.05	26	0
3.7	7.32	18	19	8.1	103	100	4.7	135	30.6	10.5	2.8	86	2.2	4.1	20.1	32	1.9	0.464	0.696	18.328	23.2	1	0	135	18	200	39	3.2	3.1	31	34.3	90	19.9	3.39	64	0
3.7	7.29	17	18	7.5	100	207	2.9	132	22.4	7.4	1.1	25	1.4	3.7	20.8	42.6	2.9	2.316	3.088	2.316	19.3	0	0	116	18	296	37	1.5	2.1	29	33	88	19.6	2.55	66	1
3.7	7.37	20	22	8.9	98	100	7.3	133	43.7	13.7	4.1	30	2.9	3	18.8	33.1	1.8	1.89	0.972	10.1925	13.5	1.6	1.7	414	14	109	27	2.6	0.2	30.8	31.2	99	18.5	4.43	75	0
3.7	7.46	23	21	8.6	97	178	4.7	136	44.5	15.8	1.9	29	1.4	2.3	14.5	31.4	1.4	0.38	0.38	15.58	19	0	0	167	30	73	25	3.8	1.2	32.7	35.5	92	13.8	4.83	83	0
3.7	7.38	19	25	7.1	98	177	4.7	137	26.8	9.1	2	32	1.4	3.5	18.9	32.7	2.4	0.704	0.176	4.477	5.5	0.4	2.2	219	27	103	25	3	0.3	32.3	34.1	95	16.6	2.83	81	0
3.7	7.34	17	25	8.4	100	110	2.7	139	46.6	15.6	0.8	9	1.8	2.9	24.8	32.9	2.4	0.948	0.79	13.114	15.8	0	0	135	12	78	24	3.8	0.3	28.8	33.5	86	15.4	5.43	61	0
3.7	7.18	14	30	9	100	165	3.6	140	39.3	12.7	1.3	12	1.3	2.6	22.2	27.9	2.1	3.725	0.745	9.536	14.9	2	1	357	32	90	20	3.6	1	29.5	32.3	91	15.4	4.31	62	0
3.7	7.46	18	24	9.7	104	172	4.3	142	40.6	13	1.2	21	1.4	1.9	14.1	29.8	1.3	0.553	0.1185	6.9836	7.9	0.8	2.4	351	11	147	16	3.8	0.4	27.5	31.9	86	15.7	4.72	45	0
3.7	7.43	23	15	9.2	97	245	6.6	128	35.7	12.2	4.4	113	2.4	5.6	41.9	40.6	4.6	0.642	1.284	29.853	32.1	0	0	585	18	140	15	2.1	0.2	30	34.3	88	19.6	4.08	58	0
3.7	7.27	24	21	10.6	96	167	6.7	134	37.7	12.7	3.6	84	2.7	3.4	15.9	34.2	1.4	0.771	1.799	20.046	25.7	0	0	292	4	69	12	2.5	0.2	33.1	33.7	98	16.2	3.84	65	0
3.6	7.29	12	26	7.5	103	61	4.4	137	26.1	8.2	2.2	55	2.4	6.9	30.8	43.2	3.1	0.909	0.606	27.573	30.3	0	0	556	3070	100	8480	2.3	0.7	32	31.4	102	15.7	2.56	50	1
3.6	7.34	20	18	7.2	105	146	6.5	136	36.6	12	2.4	15	1.9	4.6	18.9	36.7	1.8	0.384	1.664	10.24	12.8	0	0	153	341	133	1428	3.3	1	28.2	32.7	86	15.5	4.24	50	0
3.6	7.41	19	19	8	102	388	4.2	136	29.7	9.9	1.8	40	1.8	2.3	34.2	43.1	3.4	0.184	0.184	3.864	9.2	0	0	199	195	103	185	3.3	0.8	29.1	33.5	87	13.3	3.42	76	0
3.6	7.28	16	16	6.1	113	198	3.8	141	31	10.6	1.1	18	1.5	3.2	19.1	39.9	1.7	0.165	0.33	8.25	16.5	0	0	218	89	81	174	2.7	0.9	31.6	34.2	92	14.3	3.35	74	0
3.6	7.28	22	17	6	102	80	4.8	136	32.8	11	4.2	124	2.3	6.5	14.3	28.7	1.4	1.022	0.146	11.096	14.6	0	0	125	27	170	128	1.1	0.5	28.3	33.7	84	14.7	3.9	62	1
3.6	7.35	17	23	8.4	104	127	4.1	140	39.8	13.4	2.6	48	1.6	2	15.2	32.5	1.4	0.3	0.15	12.6	15	1	0	113	314	104	100	3	5.9	33.9	33.3	102	14.3	3.95	79	0
3.6	7.32	19	14	7.8	104	133	5.1	132	31.3	10.1	2	74	2.2	5.5	15.5	37.7	1.4	0.525	1.05	14	17.5	0	1	429	112	317	99	2.1	14.7	29.9	32.3	93	18.2	3.38	73	1
3.6	7.26	18	30	8.3	90	192	5.1	133	37	12.8	3.1	57	1.8	7.4	12	23.6	1	0.4745	0.143	5.8695	6.5	0.1	0.2	161	27	50	74	3.3	0.3	30.8	34.6	89	14.5	4.16	71	0
3.6	7.38	20	24	9.3	97	103	3.4	138	35.2	11.4	1.2	30	2	4.9	16.5	34.1	1.5	0	0.489	15.322	16.3	0	0	243	26	266	50	2.2	1.4	31.1	32.6	95	21.6	3.69	55	0
3.6	7.34	14	20	8.2	103	133	5.3	132	24.5	8.1	1.6	69	2	3.1	15.7	35.2	1.6	3.468	16.184	32.368	57.8	0	0	108	129	196	40	3.2	1	30.2	32.9	92	17.3	2.67	86	0
3.6	7.22	19	16	7.7	106	111	4	137	37.6	12.9	2.3	45	1.1	1.4	16.6	27.9	1.5	0.208	0.416	7.384	10.4	0	0	142	27	28	38	2.7	1.3	28.7	34.2	84	12.8	4.49	66	0
3.6	7.27	21	26	9.3	91	102	4.3	134	39.9	13.7	1.2	33	1.5	3.8	14.5	35.2	1.4	0.651	1.519	18.228	21.7	0	0	297	16	75	37	3.1	0.5	32.9	34.3	96	13.8	4.16	63	0
3.6	7.33	18	24	8.3	107	216	4.7	144	30.5	9.7	2.5	16	1.3	1.5	13.9	21.7	1.3	3.2148	0.9447	9.4752	14.1	0.6	2.8	166	13	108	36	2.9	0.4	30.8	31.8	97	21.4	3.15	70	0
3.6	7.34	19	19	7.1	100	66	4.5	133	28.3	9.7	5.2	47	1.9	4.5	17.7	35.5	1.6	0.518	1.295	23.31	25.9	0	1	228	7	142	35	1.7	0.5	30.8	34.2	90	16.1	3.14	72	0
3.6	7.26	19	22	6.8	109	203	4.1	146	29.4	9.4	1.4	57	2.1	4.4	12.8	29.4	1.1	1.26	0.63	22.68	31.5	0	0	126	22	135	26	2.6	0.5	26.8	31.8	84	16.5	3.49	64	1
3.6	7.32	21	8	7.1	128	146	6.2	151	43	13.1	2.7	121	1.8	2.7	12	22.6	1.1	1.0653	0.318	14.4531	15.9	0.2	0.3	326	27	60	25	2.2	0.4	29.8	30.4	98	16.9	4.39	84	0
3.6	7.33	18	29	9.1	113	474	5.7	154	38.8	12.7	1.8	62	2.6	2.7	18.9	27.4	1.7	0.7099	0.2519	21.8695	22.9	0.2	0.1	294	12	76	23	2.4	0.6	31.5	32.8	96	14.9	4.04	64	0
3.6	7.39	16	28	7.5	97	235	4	137	38.7	13.6	1.8	29	1.9	2.7	11.1	29.6	1	1.0048	0.471	14.0829	15.7	0.4	0.6	206	22	79	22	3.2	1.5	29.7	35.2	84	12.7	4.59	73	0
3.6	7.36	22	23	9.3	100	282	4.5	140	33.1	11.1	0.9	22	1.5	3.1	14.1	25.5	1.2	0.9966	0.3775	13.6504	15.1	0.3	0.2	500	13	93	16	3.7	0.6	28.5	33.4	85	16.2	3.88	71	0
3.6	7.49	24	16	9.8	97	193	4.7	132	33.2	10.3	5.6	118	2.2	1.5	13.6	27.1	1.2	1.384	0.692	13.84	17.3	0	0	283	13	264	15	2.4	0.3	30.5	31.1	98	20.2	3.39	75	1
3.6	7.39	19	19	8.4	99	69	4.5	132	40.4	13.1	2.5	29	1.3	1.2	13.9	39	1.3	1.132	1.132	50.374	56.6	0	0	299	17	102	15	1.9	0.7	33.9	32.5	104	18.2	3.88	81	0
3.6	7.4	17	27	8.7	97	307	4.7	136	34.9	11.2	1.7	30	1.7	4.4	18.3	34	2.2	3.077	0.362	6.878	18.1	0	4	320	8	276	13	3	0.3	29.8	32.1	93	18.3	3.76	68	1
3.5	7.24	18	21	8.7	94	171	3.8	129	28.9	9.9	1.3	24	1.7	2.7	19.1	35.3	1.8	0.1452	0.0528	4.1976	4.4	0.1	0.1	110	779	515	565	3.5	2.3	28.8	34.3	84	15.8	3.43	84	0
3.5	7.45	14	21	7.9	111	185	4.3	142	29.6	10.5	1.1	13	1.3	3.8	14.7	24.6	1.4	0.54	0.9	13.32	18	0	0	187	399	47	379	2.9	2.4	30.5	35.5	86	12.8	3.45	19	0
3.5	7.2	16	16	6.3	106	88	4.2	134	26.6	9.2	2.8	82	1.4	3.5	14.5	43	1.4	1.096	0.274	10.686	13.7	0	0	24	119	101	322	1.8	17.5	32.1	34.4	93	15.1	2.86	87	0
3.5	7.36	19	24	7.8	94	248	5	132	43.9	14.3	1.6	37	1.1	1	15.4	35.6	1.4	0.556	1.112	22.796	27.8	0	0	236	127	124	236	3.7	1.8	33.1	32.5	102	13.4	4.3	69	0
3.5	7.29	18	18	7	105	74	4.9	136	25	8.5	2.6	54	1.6	3.7	14.7	24.3	1.4	1.056	0.352	16.192	17.6	0	0	339	34	58	131	2.4	0.3	31.6	34	93	15.5	2.69	64	1
3.5	7.31	13	37	9.5	100	124	4.8	145	34.4	10.6	1.1	24	2	2.5	11.1	26	0.9	0.174	0.435	5.133	8.7	0	0	260	103	682	122	3.6	0.4	31.7	30.9	103	17.7	3.35	58	0
3.5	7.38	12	24	7.5	99	126	3.5	131	35.9	12	2.2	26	1.2	1.3	20.5	39.1	2.6	1.488	1.984	18.6	24.8	0	0	175	73	149	112	2.7	1.3	30.3	33.3	91	18.2	3.94	77	0
3.5	7.45	11	34	10.2	102	211	2.9	144	40.2	12.9	2.2	41	2.7	3.6	13	26.5	1.1	1.1011	0.3465	6.0753	7.7	1.1	1.2	461	73	149	112	2.9	1.3	26.4	32.2	82	14.8	4.89	80	0
3.5	7.33	18	20	8.3	97	93	4.3	131	39.2	14.6	1.4	25	1.6	2.5	14	29.1	1.2	2.0328	0.1672	6.3888	8.8	0.1	2.3	161	49	69	94	2.8	0.9	32.2	37.3	86	12.6	4.54	49	0
3.5	7.34	15	24	7.3	98	254	4.1	133	23	6.9	4.2	56	2	4.9	16	150	1.5	0.795	0.1749	4.2718	5.3	0.2	0.9	65	83	78	80	3.2	2.1	29.8	30	99	20.1	2.31	81	0
3.5	7.25	17	16	8.5	103	223	3.8	132	33.9	11.9	2	41	1.5	2.8	14.4	30.7	1.3	0.3179	0.3179	17.8024	18.7	0.1	1.3	228	101	376	76	3.6	1.2	31.4	35.2	89	14.2	3.79	47	0
3.5	7.34	16	20	7.9	105	142	4.1	137	37.5	12.9	1.4	24	1.3	1.1	16.2	44.5	1.5	0.32	0	0.58	1	1	0	127	48	50	76	3.2	0.6	30.6	34.4	89	12.3	4.22	58	0
3.5	7.3	19	27	7.2	97	171	6.4	137	43.8	13.5	2	47	1.9	2.8	22.3	30.1	2.1	1.6125	0.946	18.6835	21.5	0.1	1	213	33	88	62	3	0.8	21.9	30.8	71	16.8	6.16	65	0
3.5	7.51	20	24	6.3	105	171	4.6	144	39.4	13.1	3.1	38	1.6	2.8	13.9	24.4	1.2	3.1164	0.5565	11.8773	15.9	0.3	2	317	24	146	41	2	0.5	29	33.3	87	14.5	4.52	81	0
3.5	7.28	21	19	7.3	99	381	2.9	136	32.3	11.3	1.2	32	0.8	2.4	15.9	29.1	1.4	0.264	0.033	2.475	3.3	0	0	64	29	69	38	3.1	2.7	27.7	35	79	15.1	4.09	82	1
3.5	7.3	17	25	8.3	96	122	4.3	134	33.1	11.4	0.7	22	1.8	2.6	12.1	24.2	1	0.18	0.108	2.772	3.6	0	0	277	70	96	35	3.7	0.3	32.9	34.5	96	20.7	3.46	39	0
3.5	7.34	17	22	9.4	106	142	3.6	141	38.9	13.5	1.3	27	1.4	1.6	13.7	38	1.2	0.342	0.3306	10.602	11.4	0.2	0.8	204	39	49	30	4.5	0.7	30.2	34.7	87	16.3	4.46	72	0
3.5	7.25	18	32	10.2	95	120	4.1	141	34.8	10.8	2.9	63	2.4	7	12.6	30.3	1.1	1.16	0.5365	12.76	14.5	0.2	0.2	444	16	80	27	3.4	0.4	25.9	31	84	17	4.17	64	0
3.5	7.37	18	25	8.1	99	95	3.6	138	28.3	9.9	2.1	39	1.7	2.9	14.6	26.6	1.3	0.626	1.252	25.353	31.3	0	0	206	13	77	27	2.9	1.3	29.4	34.9	84	15.3	3.36	84	0
3.5	7.34	17	18	6.9	111	75	5.2	141	33.9	10.6	1.9	34	1.6	4	13.8	28.7	1.3	0.612	0.408	15.708	20.4	0	1	213	23	96	27	2.8	0.9	30.6	31.2	98	14.9	3.46	64	1
3.5	7.35	26	16	8.9	95	179	4.4	133	28.7	9	5.6	122	2.1	8.3	18.9	36.7	2.4	1.9952	0.9512	20.1376	23.2	0.2	0.3	419	10	90	25	2.7	0.4	28.1	31.3	90	16.6	3.2	77	0
3.5	7.39	20	26	9.8	106	116	4.7	147	44.3	14.4	0.4	24	2.6	3.3	13	27.8	1.1	2.0224	0.5056	13.1772	15.8	0.5	0.1	528	19	56	20	2.6	0.2	32.1	32.5	99	13.8	4.47	59	1
3.5	7.35	19	27	9.9	102	235	4.6	143	39.8	13.6	1.1	16	1.6	3.6	12	24.9	1	0.676	0.169	13.351	16.9	0	0	380	15	127	19	3.8	0.6	28	34.3	82	14.1	4.88	62	0
3.5	7.35	14	20	5.6	112	113	4.3	142	22.7	7.3	2.7	79	1.4	2.1	16.6	48.8	1.5	0.9918	0.0342	0.7668	1.8	0.3	0.1	76	11	37	17	1.5	0.2	29.9	32.4	92	20.6	2.46	52	0
3.5	7.09	23	7	11	85	1034	4.5	123	43.2	13.5	8.3	113	3.9	9.2	13.1	19.7	1.1	0.7926	0.6605	11.4927	13.21	0	0	241	16	110	14	3.4	0.3	29.1	31.2	93	13.6	4.63	66	0
3.4	7.31	17	24	5.6	91	504	4.9	127	41.4	14.3	0.5	5	1.6	2.3	11.3	25.4	1	2.916	0.7992	17.7552	21.6	0.2	0.4	172	205	265	459	2.4	0.3	31.2	34.6	90	13.9	4.6	51	0
3.4	7.3	12	28	7.7	101	154	4.3	137	39	13	1.3	17	2.7	2.2	13.9	35.5	1.3	0.167	0.167	14.696	16.7	0	0	216	156	152	240	3.3	0.4	31	33.2	93	14.6	4.18	64	0
3.4	7.33	16	27	9.4	102	202	4	141	42.7	14.1	1.3	31	2	1.9	28	26.7	2.9	0.3159	0.2223	11.0682	11.7	0.4	0.4	91	167	108	218	4.8	3.6	29.9	33.1	91	14.9	4.72	79	0
3.4	7.46	18	23	8.5	98	103	4.8	134	39.1	14	1.6	36	2.2	3.1	18.3	30.6	1.7	0.7392	0.9394	13.6906	15.4	0.1	0.1	254	73	149	112	2.9	1.3	33.1	35.7	93	13.1	4.21	78	0
3.4	7.3	10	24	7.8	110	130	3.2	141	25.5	10.9	0.3	18	1.4	4.3	14.5	35.7	1.3	0.858	0.273	18.2715	19.5	0.2	0.2	217	73	149	112	2.1	1.3	31.9	35.5	90	17.6	3.42	31	1
3.4	7.43	22	27	8.6	92	75	8.9	132	35.2	11.1	2.2	61	2.1	3.7	16.4	31.6	1.5	1.4062	0.5846	13.5564	15.8	0.4	1.2	209	40	159	106	3.3	1.1	28.5	31.5	91	17.5	3.89	87	1
3.4	7.4	17	25	8.8	100	144	4	138	40.6	13.5	1.6	35	2.2	1.9	25	33.4	2.5	0.504	1.512	8.904	16.8	0	0	176	148	259	101	3.8	6.5	34.1	33.2	103	14.1	3.95	83	0
3.4	7.17	16	29	7.3	93	176	4.7	133	34.2	11.9	1.3	39	1.4	2.3	12.5	35.6	1	0.58	0.145	1.943	2.9	0	0	145	91	202	100	2.8	0.5	32.8	34.7	94	16.7	3.62	85	0
3.4	7.34	23	18	7	105	172	4.7	141	35.3	12.1	4.3	74	1.9	2.8	14.9	32.3	1.3	0.755	0.453	12.986	15.1	0	0	29	28	75	100	3.9	0.4	29.3	34.3	85	15.6	4.13	64	0
3.4	7.45	20	22	9.3	96	80	3.7	134	28.3	8.6	1.4	18	1.4	1.6	14.2	35.2	1.3	0.026	0.013	1.04	1.3	0	0	173	45	231	58	4.1	1.1	29.6	30.3	98	18.5	2.9	39	0
3.4	7.27	14	27	8.7	103	174	4	140	39.2	12.5	1.1	17	1.5	4.2	9.1	28.5	0.8	0.852	1.136	11.076	14.2	0	0	334	46	106	56	2.9	0.3	35.1	31.9	110	17.7	3.56	58	1
3.4	7.45	24	30	10	90	119	4.7	139	46.2	15.5	5.7	25	1.8	4.8	18.7	46.5	2.5	0.69	0	10.695	11.5	0	0	138	66	468	41	4.9	0.5	28.3	33.5	84	17.9	5.47	47	0
3.4	7.11	21	24	9.9	98	219	5.8	137	34.3	11	1.8	46	2	5.8	24.4	33.6	3.8	1.2095	0.4715	18.573	20.5	0.2	1	567	18	92	40	3	0.6	27.4	32.1	85	14.5	4.02	75	0
3.4	7.34	18	19	7.1	85	186	5.2	117	32.2	10.9	1.7	32	1.6	2.4	12.8	29.5	1.1	3.6848	0.49	15.2684	19.6	0.2	0.5	346	15	130	39	2.9	0.9	28.3	33.8	84	12.9	3.84	89	0
3.4	7.48	8	31	8.1	105	87	4.1	140	37.4	12.9	0.5	25	2	2.1	13.1	56.3	1.1	0.506	1.012	22.77	25.3	0	0	166	19	66	29	2	0.4	33.7	34.5	98	18.4	3.83	64	0
3.4	7.3	20	22	7.6	92	291	5	129	29.7	10.1	3	67	1.5	4	12	28.3	1	1.3778	0.5312	14.6578	16.6	0.1	0.2	364	21	143	28	2.7	0.3	27.5	33.8	81	14.9	3.65	64	1
3.4	7.35	19	27	9.3	98	334	3.8	140	37	12.7	1.1	29	2	2.7	12.9	22.1	1.1	1.75	4.2	28	35	0	0	235	21	129	27	4.2	1	31.5	34.3	92	13.3	4.03	64	0
3.4	7.35	17	27	9.2	95	133	4.2	135	21.1	6.8	1.3	50	2.7	3.9	13.8	20.8	1.2	1.352	0.208	4.368	10.4	1	1	368	13	108	26	2.3	0.2	30.4	32.1	95	15	2.22	74	0
3.4	7.4	21	23	9.3	107	171	4.8	146	44.9	15.3	1.8	39	2.3	2.6	13.9	29.1	1.2	0.78	0.156	14.352	15.6	0	0	266	14	55	26	3.8	1	32.7	34.2	96	13	4.69	76	1
3.4	7.34	19	24	8.9	102	485	5.7	139	45.8	15	2.5	87	3.4	1.6	10.9	35	1	0.8316	0.3132	9.5148	10.8	0.7	0.6	251	11	129	24	2.6	0.2	32	32.7	98	12.3	4.69	80	0
3.4	7.21	20	20	7.7	99	109	3.1	136	31.8	9.2	9.1	35	1.4	5.8	24.1	150	2.3	2.486	2.486	15.82	22.6	0	1	386	10	126	21	2.8	1.2	22.8	29	79	20.1	4.05	51	0
3.38	7.34	13	24	8.1	103	192	4.4	136	37.1	11.4	1.1	21	1.2	2.7	13.3	21.2	1.2	0.512	0.4608	11.7888	12.8	0.1	0.2	148	30	71	18	3.4	1.1	19.2	30.8	62	15.3	5.97	44	0
3.3	7.21	24	17	6.6	101	115	2.8	139	32.8	11.5	3	37	1.2	1.2	14.7	31.5	1.3	0.93	0.62	22.32	31	0	0	90	465	252	543	2	11.2	30	35.2	85	14.6	3.84	70	0
3.3	7.33	16	19	6.4	97	124	4.1	128	39.1	13.9	1	17	1.8	2.4	14.7	46.6	1.3	0.552	0.276	2.668	4.6	0	0	65	208	262	390	2.5	3.8	32.3	35.5	91	13.9	4.29	45	0
3.3	7.42	16	18	7.7	102	148	3.3	133	41.2	14.8	1.9	46	1.9	1.1	14.1	33.7	1.3	0.218	0.109	6.431	10.9	0	0	79	92	177	182	3	2.4	31.7	35.9	88	15	4.66	84	0
3.3	7.3	13	34	7.7	98	279	4.3	141	40.5	13.4	1.1	35	1.9	1.8	12.5	26.6	1.1	0.518	0.74	5.55	7.4	0	0	200	140	122	162	3	0.4	29.6	33.1	90	12.7	4.53	85	0
3.3	7.24	24	17	8	142	247	2.7	177	39.8	11.9	1.1	42	1.4	3.6	14.4	24.9	1.2	2.064	0.6708	10.1136	12.9	0.3	0.2	170	75	110	108	2	0.4	28.5	30	95	17.2	4.19	53	0
3.3	7.34	15	21	7.5	112	209	6.1	142	34.1	10.9	1.1	38	1.7	1.6	13.3	21	1.1	1.4448	0.6708	14.792	17.2	0.3	1.4	654	47	385	86	2.2	0.3	31.3	31.8	98	16.5	3.47	88	0
3.3	7.34	7	24	7.3	105	82	4.3	132	27.7	9.6	0.9	16	1.4	3.4	17.3	38.5	2	1.1	0.35	3.4	5	2	1	81	44	79	83	1.8	2.1	39.4	34.6	114	18.4	2.44	69	0
3.3	7.29	15	27	9.8	103	150	4.2	141	44.6	16.1	0.9	17	1.9	1.9	12.5	26.7	1.1	0.6615	0.084	9.7125	10.5	0.2	0.2	168	188	45	70	2.5	0.9	32.4	36	90	13.6	4.95	64	0
3.3	7.42	16	30	8.7	94	128	3.7	136	27.8	9	0.9	20	1.8	3.3	14.5	35	1.3	1.012	0.506	23.023	25.3	0	0	230	27	151	57	2.6	0.4	29	32.3	90	17.1	3.1	33	0
3.3	7.33	21	24	10	96	129	5	136	38	11.3	6.3	48	1.5	6	15.8	31.3	1.7	1.1859	0.6549	15.753	17.7	0.3	0.3	307	32	449	54	3.1	0.6	25.9	29.6	88	18.1	4.34	39	1
3.3	7.51	22	28	9.4	93	111	4.8	138	29.1	9	4.4	24	1.6	2.7	15.3	95.4	1.6	0.96	0.5664	7.872	9.6	0.6	1.4	376	16	347	50	2.9	0.9	27.5	31	89	16.2	3.27	59	0
3.3	7.36	23	19	9.6	94	160	4.3	132	32.1	10.6	1.1	24	1.9	5	15.9	34.8	1.5	3.24	1.296	55.728	64.8	0	0	450	48	114	48	2.8	1	29.4	32.9	89	16.7	3.6	69	0
3.3	7.34	16	24	8.8	115	88	5.2	150	25.1	7.9	1.7	69	2.3	5.2	13.5	32.5	1.2	2.108	0.544	3.332	6.8	0	0	221	17	209	47	1.9	2.1	29.9	31.6	95	15.7	2.65	78	0
3.3	7.34	17	22	8.1	101	132	3.2	137	27.4	10.1	0.8	30	1.4	2.4	14	23.4	1.2	0.071	0	0.017	0.1	0	12	13	62	106	43	3.4	2.9	30.2	37	82	16.8	3.36	48	0
3.3	7.34	22	19	9.3	95	185	5.1	131	30.7	10.6	3.8	102	1.5	1.8	13.4	35.2	1.1	0.786	0.786	31.44	39.3	0	1	148	30	266	42	2.6	1	30	34.7	86	13.6	3.55	74	0
3.3	7.28	22	24	8.8	97	66	5	138	36.1	11.9	5.4	32	1.7	4.5	43.2	40.7	4.9	0.876	0.146	6.132	7.3	0	1	162	29	255	41	3.6	0.4	30.6	32.8	93	17.8	3.88	51	0
3.3	7.4	16	20	7.2	95	209	3.4	128	31.1	11.1	0.9	13	1.5	2.7	13.4	31.3	1.2	0.4902	0.2508	10.6134	11.4	0.1	0.3	127	53	78	39	2	0.3	28.9	35.6	81	14.9	3.83	64	1
3.3	7.02	18	10	6.6	117	85	5	140	30.9	9.6	2.2	27	2	7	27.5	53.2	2.8	1.1088	0.1056	25.0008	26.4	0.1	0.7	71	25	94	39	2	2.1	32.6	31	105	19.1	2.94	56	1
3.3	7.28	16	15	7.1	108	112	2.1	137	24.5	7.8	3.5	48	1.9	3.7	16.3	35.5	1.5	2.353	2.534	11.765	18.1	0	0	246	16	238	38	1.3	0.8	27.3	31.8	86	16.5	2.86	59	0
3.3	7.41	16	25	8	104	85	4.4	141	23.5	7.7	0.8	28	1.5	3.8	15.4	28.5	1.3	2.232	8.184	25.668	37.2	0	0	29	29	233	35	2.2	1.5	31.7	32.9	96	22.7	2.44	84	1
3.3	7.32	19	19	7.5	93	111	4	127	31.5	10.7	3.4	50	1.5	3.4	17.9	42.1	1.6	1.5957	0.5516	17.4936	19.7	0.1	0.2	58	28	116	33	2.1	7.5	29.6	33.8	88	16.8	3.6	52	0
3.3	7.34	21	21	8.8	106	324	4.8	143	39.4	12.7	1.5	20	1.1	2.1	13.7	25.2	1.2	0.296	0.74	10.508	14.8	2	1	328	29	75	30	2.7	0.3	31.3	32.1	97	14.5	4.05	85	1
3.3	7.24	15	16	6	114	111	3.3	142	33.4	11.4	1.5	15	0.9	3.5	16.5	33.6	1.5	0.166	0.332	2.324	8.3	0	0	179	17	33	27	2.7	0.3	30.9	34.1	91	12.8	3.68	43	0
3.3	7.31	14	26	8.3	102	78	3	139	34.9	12.1	4.3	13	1.1	1.7	33.3	150	3.6	0.399	0.114	5.13	5.7	0	0	130	58	87	24	3.2	0.3	29.7	34.5	86	15.8	4.06	56	0
3.3	7.3	20	26	8.4	98	156	3.1	141	41.5	13.4	0.4	9	1.5	2.5	15	35.5	1.4	0.4452	0.3816	14.8665	15.9	0.4	0.8	311	32	65	23	4.1	0.6	26.8	32.2	83	13.5	4.99	56	0
3.3	7.39	12	22	7.7	112	143	3.8	142	34.5	11.6	0.6	11	1.9	1.9	12.5	35	1.1	2.5696	0.5632	5.3152	8.8	0.2	3.8	199	5	56	23	3	0.4	33.5	33.7	99	13.5	3.47	64	0
3.3	7.36	15	14	7.1	120	136	3.6	145	28.2	8.1	0.4	7	1.7	2.9	17.4	47.3	1.6	2.1384	0.33	10.56	13.2	0.5	0.7	281	13	155	20	1.1	0.2	21.9	28.7	76	18.4	3.69	47	1
3.3	7.37	16	24	8.9	105	129	4.8	140	37.7	12.4	2.2	35	2.4	3.3	20.9	39.3	2.9	1.677	0.7995	16.926	19.5	0.2	0.3	171	17	157	19	3.8	0.7	30.1	32.9	92	14.6	4.11	64	0
3.3	7.24	13	31	8.2	99	91	4.4	139	30.9	9.5	1.3	22	1	3.5	18.9	28.4	2.4	1.076	0.538	23.403	26.9	0	0	574	7	106	14	2.5	0.2	25.2	30.7	82	17.2	3.77	66	0
3.3	7.52	21	28	9.2	95	110	3.6	140	41.2	13.3	5.4	27	1.3	2.3	17.2	150	1.9	0.5346	0.2574	5.6628	6.6	0.4	1.8	140	11	149	13	2.9	0.4	31.1	32.2	97	14.2	4.27	70	0
3.3	7.44	13	31	9.6	99	223	4.1	139	34.4	11.7	4.3	9	1.9	2.2	20.2	27.9	1.9	0.3157	0.2002	7.1764	7.7	0.1	0.1	245	7	310	13	4.3	0.4	31	33.9	91	14.4	3.77	53	0
3.3	7.16	16	13	8.6	127	124	5.2	151	35.4	11.1	3.3	90	2.6	2.8	12.9	27.9	1.1	0.375	0.225	6.9	7.5	0	0	107	22	310	13	2.4	0.4	30.4	31.4	97	16.1	3.65	64	1
3.2	7.31	19	21	8.3	91	186	4.3	127	36.6	12.9	2.2	59	2	5	115	40.1	16.5	1.1316	0.492	14.7436	16.4	0.1	0.1	274	607	144	1187	3.4	1.1	32.6	35.2	92	14	3.96	77	0
3.2	7.45	16	24	9.2	100	286	5.4	135	38.6	12.9	1.7	40	2.1	3.3	13.6	25.4	1.2	1.2852	0.408	8.262	10.2	0.2	2.2	223	191	283	374	3.2	1.4	29.8	33.3	90	13.5	4.31	86	1
3.2	7.27	20	22	5.9	89	87	4.8	126	40.8	13	1.1	18	1.4	2.9	18.5	39.6	1.7	1.386	0.924	9.856	15.4	0	0	207	33	85	148	2.2	0.5	25.1	31.8	79	15.5	5.16	26	0
3.2	7.23	10	23	8.6	115	117	4.3	143	37.1	13.2	1.1	22	2	3	14.9	30.9	1.3	1.8906	0.4554	11.385	13.8	0.3	0.2	206	69	31	122	1.6	1	32.2	35.5	91	12.7	4.1	61	0
3.2	7.43	18	23	8.4	102	137	5.8	137	36.1	12.3	1.4	61	1.8	4.1	13.7	25.3	1.3	1.3899	0.3567	10.4181	12.3	0.3	0.7	199	73	149	112	2.9	1.3	32.6	34.1	96	20.2	3.78	82	0
3.2	7.06	17	21	8.4	106	325	4.3	138	31.9	9.5	2.1	27	2.3	7	13.1	28	1.1	3.686	0.3298	15.132	19.4	0.2	1	521	73	149	112	2.9	1.3	29.1	29.7	98	16.1	3.26	64	0
3.2	7.54	17	15	9	111	137	3.1	140	27.7	9.7	0.9	19	1.7	2.1	19.1	150	2.4	1.5912	0.357	8.1192	10.2	0.3	0.9	262	73	149	112	2.8	1.3	29.6	35	85	16.5	3.27	55	0
3.2	7.35	14	23	7.8	93	111	5.1	125	31.9	10.9	1.6	67	2.4	3.7	19.1	42.1	2.4	0.305	0.915	27.755	30.5	0	1	91	25	91	89	1.6	18.7	37.3	34.2	109	18.9	2.93	66	1
3.2	7.49	24	29	8.7	85	296	8.3	130	38.2	11.7	7.7	49	2.2	5.1	21.5	38.9	2	2.041	1.413	9.263	15.7	0	0	120	25	99	75	3.4	0.6	28.7	30.6	94	15.2	4.06	65	0
3.2	7.35	21	19	8.2	96	106	3.7	132	37.9	13.4	5.4	77	1.7	2.7	14.3	26.1	1.2	0.918	0.408	7.446	10.2	0	1	63	47	261	55	2.7	6.7	30.6	35.4	86	14.1	4.38	60	0
3.2	7.44	15	28	8.6	97	110	3.9	136	24.4	8.6	0.6	21	1.7	5.2	13.8	25.2	1.3	0.58	0.58	4.002	5.8	0	1	57	87	198	54	2.9	0.4	30.4	35.5	86	14	2.85	45	1
3.2	7.42	21	23	8.2	100	35	4	140	10.8	3.4	3.2	27	1.5	5.3	21.3	42.4	2	1.584	0.495	7.722	9.9	0	0	168	14	167	54	2.7	1.4	31.1	31.8	98	17.3	1.11	56	0
3.2	7.18	17	35	6.9	109	384	4.2	157	44.1	13.1	1.6	62	2	3.3	12.9	24.6	1.2	1.32	0.77	5.72	11	0	0	206	87	61	53	2.8	0.4	30	29.8	101	13.5	4.37	85	1
3.2	7.34	15	26	8	102	151	4.1	139	32.7	10.7	1.3	32	1.6	4.2	16.2	26.7	1.4	0.744	0.186	15.438	18.6	0	0	199	62	57	43	3.4	0.8	28.7	32.9	87	16.9	3.75	80	0
3.2	7.33	18	18	8	106	104	3.8	138	26.8	8.1	2.8	123	2	3.6	48.7	41.4	5.3	0.5232	0.3488	9.9844	10.9	0.1	0.3	214	36	95	36	2.6	0.3	27.6	30.3	91	16.6	2.94	89	1
3.2	7.55	20	24	8.9	96	112	4.9	135	35.3	11.4	1.7	42	1.8	5.7	13.7	27.7	1.2	1.9176	0.408	7.803	10.2	0.4	0.3	213	57	105	35	3.3	2.5	30.7	32.4	95	15	3.72	64	1
3.2	7.49	18	27	8.8	101	127	5.1	141	34.7	11.6	1	39	2	3.6	17.8	36.3	1.8	0.5016	0.3828	12.2364	13.2	0.5	0.1	289	49	157	32	2.9	0.2	31	33.4	93	18.4	3.73	61	0
3.2	7.39	16	34	9.4	92	116	4.1	138	30.9	9.9	1.5	25	2.7	2.6	17.4	29.3	1.9	1.26	0.504	19.152	25.2	0	0	324	26	181	30	2.6	0.5	28.2	32	88	15.3	3.51	71	0
3.2	7.22	16	17	6.2	106	93	5.2	134	28.5	9.4	1.4	17	1.3	2.3	15.8	35	1.4	0.266	0.1976	7.1288	7.6	0.1	0	175	16	81	26	2.7	0.2	29.2	32.9	89	13.1	3.2	68	0
3.2	7.32	21	20	8	103	125	4.5	139	28.9	9.2	2.7	95	2.2	3.9	12.9	26.1	1.1	0.57	0.456	3.933	5.7	0	0	283	9	61	25	2.3	0.5	33.2	31.9	104	14.5	2.78	84	0
3.2	7.37	14	19	7.5	111	127	3.4	141	34.5	11.9	0.8	9	1.6	2.6	14.7	43	1.3	4.112	0.352	11.216	16	0.1	2.1	284	11	58	25	3.3	0.4	30.5	34.4	89	13.5	3.89	49	0
3.2	7.12	16	20	6.3	95	155	4.2	127	36.9	12.4	0.7	19	1.2	2	10.5	32.4	1	0.41	0.82	16.195	20.5	0	0	313	17	74	23	3.6	0.5	30.2	33.6	90	12.8	4.11	54	0
3.2	7.45	15	24	8.7	101	110	4	136	24.8	8.2	1	32	1.3	2.2	22.2	30.1	3.3	0.616	0.385	6.622	7.7	0	0	111	16	137	22	2.5	1.5	27.5	33.1	83	20.8	2.98	64	1
3.2	7.34	28	20	10.3	90	159	5.1	133	42.9	15	1.3	23	2.5	2.8	12.3	20.2	1.1	0.5311	0.3729	10.3621	11.3	0.1	0.2	475	7	246	21	4.5	0.5	29.4	35	84	13.9	5.1	49	0
3.2	7.39	14	21	8	104	165	3	136	28.3	8.7	1.5	16	1.3	2.4	20.6	30.1	1.9	2.7189	0.5724	12.4974	15.9	0.5	0.1	125	9	73	19	2.9	0.7	24.4	30.8	79	19.2	3.57	85	0
3.2	7.34	18	25	6.5	98	95	4.1	137	41.9	14.4	1.8	26	1.5	3.2	12.8	25.7	1.1	1.152	1.296	11.088	14.4	0	0	185	11	26	17	2.7	0.5	32.3	34.4	94	12.8	4.46	60	0
3.2	7.42	14	37	12.5	82	139	4.1	129	32.3	11	3.6	44	2.2	4.1	11.7	23.2	1	1.4994	0.3654	10.6218	12.6	0.5	0.4	242	14	54	16	4.4	0.3	28.1	34.1	82	19.8	3.92	51	0
3.2	7.37	10	23	7.2	105	123	4	134	40.7	13.5	0.8	11	1.1	3.2	19.6	31.9	1.9	0.8	0.8	11.68	16	0	0	342	7	60	14	2.2	0.7	29.2	33.2	88	12.8	4.63	42	0
3.2	7.43	13	26	8.6	103	115	5.2	137	37.3	13.3	2.3	30	1.8	3.3	14.3	54.5	1.3	0.6667	0.3729	10.2378	11.3	0.1	0.1	255	19	99	12	2.9	0.5	36.4	35.7	102	12.7	3.66	44	0
3.1	7.43	20	23	9	120	165	2.5	160	58	19.7	4.4	65	2.6	2.1	15.2	29.3	1.4	1.9886	0.5368	9.6502	12.2	0.2	0	156	753	94	531	2.8	0.2	30.5	34.1	90	15	6.46	72	0
3.1	7.27	14	33	9.1	91	123	2.9	135	40.6	13.2	1.3	24	1.6	2.4	15.9	25.4	1.4	0.196	0.294	3.969	4.9	0	0	103	312	563	173	2.4	6.3	29.3	32.6	90	16	4.52	83	0
3.1	7.38	13	21	7	99	90	4.2	129	33.5	12.4	1.7	43	2.3	4	24.1	34.5	2.3	0.153	1.377	12.852	15.3	0	0	110	74	108	136	2.4	7.2	36.5	36.9	99	15.6	3.39	72	1
3.1	7.38	18	24	8.9	97	114	4.3	135	28.9	9.8	0.9	23	1.9	4.9	13.6	32.7	1.2	0.459	0.255	3.876	5.1	0	0	89	73	149	112	2.9	1.3	30.7	33.9	90	15.6	3.2	76	0
3.1	7.45	12	26	7.3	103	94	3.2	138	28.9	9.8	0.7	25	1.5	2.3	16.5	37.9	1.5	0.7722	0.2772	2.1978	3.3	0.5	1.1	127	73	149	112	2.9	1.3	33.4	33.8	99	18.3	2.93	61	0
3.1	7.39	16	19	6.8	106	160	3.1	138	26.4	8.8	1.6	24	1.4	3.2	18.8	30.8	1.8	0.279	0.837	5.301	9.3	0	0	128	42	78	75	3	2.4	27	33.3	81	15	3.26	54	0
3.1	7.37	17	16	7	110	128	4.2	139	32.8	11.3	2.8	85	1.8	4.1	25.8	39.2	2.5	0.684	0.342	8.664	11.4	0	0	166	56	100	68	2.9	1.3	31.3	34.5	91	17.9	3.61	64	1
3.1	7.4	17	25	7.5	100	135	3.7	138	37.1	12.6	4.6	77	1.9	5.4	118.7	55.3	12.7	0.304	2.128	26.448	30.4	0	0	111	112	309	63	2.9	1.1	31	34	91	15.1	4.07	78	0
3.1	7.3	13	23	7.7	110	66	4.1	142	25.8	8.8	1	39	1.6	3.6	17.5	46	1.6	0.5754	0.5754	26.1396	27.4	0.2	0.1	106	56	869	63	1.9	1.2	36.1	33.9	107	15.5	2.42	62	1
3.1	7.49	19	22	8.1	95	157	4.2	132	36.7	12.3	1.8	30	1.9	3.3	19.8	31.3	1.9	0.5319	0.2349	1.8981	2.7	0.9	0.4	116	27	61	48	2.9	2.4	29.8	33.6	89	15.3	4.14	81	0
3.1	7.34	19	23	8.4	92	77	3.6	130	13.3	4.8	1.5	27	1.5	2.1	13.1	29.1	1.1	0.91	0.182	15.288	18.2	0	0	304	42	183	43	3.7	0.8	29.4	36	82	14.2	1.63	62	0
3.1	7.34	17	17	7.4	106	102	5.4	135	26.5	8.7	1.3	47	1.5	4.2	29.3	36	2.9	1.89	0.81	20.79	27	0	0	36	38	266	37	2.4	0.7	33.7	32.7	103	23.8	2.57	83	1
3.1	7.43	21	12	8	118	90	5.3	146	36.6	13.2	3.2	113	2.5	8.2	17.7	32.7	1.7	0	0.603	19.296	20.1	0	0	20	4	101	35	1.6	1.5	31.4	36	87	16.6	4.19	70	0
3.1	7.34	19	26	8.7	97	67	5	137	27.8	8.5	3.7	33	1.5	3	13.6	35.4	1.3	1.7736	2.1431	69.7616	73.9	0.1	0.2	149	28	85	34	3.8	0.4	36.8	30.6	120	21.8	2.32	87	0
3.1	7.31	14	27	8.3	102	138	4.1	139	35	11.3	0.7	29	1.7	3.8	16.8	29.2	1.6	1.7595	0.5106	4.4505	6.9	1.1	1.5	464	55	173	34	2.9	0.4	31.7	32.4	98	13.3	3.57	81	0
3.1	7.42	18	20	8.8	104	113	4.9	137	37.9	12.8	1.6	25	1.4	3.2	12.5	23.4	1	1.491	0.6816	11.9706	14.2	0.1	0.3	253	25	154	33	4.2	1.9	29.1	33.7	86	15.1	4.4	63	0
3.1	7.22	13	27	9.5	104	134	4.2	140	41.8	14.2	0.7	31	1.8	2.2	15.4	30.9	1.4	1.869	1.869	22.962	26.7	0	0	208	17	99	32	2.5	0.6	35.2	34	104	11.7	4.03	53	0
3.1	7.36	19	22	9.2	96	116	3.5	133	45.3	15.3	1.9	20	1.6	2.4	12.9	25.8	1.1	0.346	0.865	15.224	17.3	1	0	202	20	81	30	3	1.1	27.5	33.6	82	13.7	5.55	53	0
3.1	7.12	15	17	8.8	105	123	6.4	131	34.2	10.6	2.2	34	1.5	2.6	12.3	29.1	1.1	1.2462	0.4958	11.5508	13.4	0.3	0.6	233	21	84	27	3.1	0.4	23.7	30.9	77	24.9	4.45	63	0
3.1	7.24	21	19	9.1	108	136	5.4	143	32.5	10.1	2.8	75	1.9	6.5	17	26.2	1.6	1.235	0.741	20.007	24.7	0	0	306	29	149	27	2.9	0.3	29.1	30.9	94	14.4	3.46	64	0
3.1	7.29	25	19	7.5	98	100	3.5	138	37	13.6	5.9	158	2.3	1.9	14.1	21.9	1.2	2.178	1.21	19.36	24.2	0	0	26	15	635	25	2.4	1.6	29.8	36.7	81	15.3	4.55	75	0
3.1	7.47	11	23	8.6	108	157	3.5	138	35.2	11.6	0.6	11	1.6	3.3	12.5	26.3	1.1	0.7161	0.2695	6.6605	7.7	0.4	0.2	249	17	66	22	3.6	0.2	26.7	33.1	81	13.8	4.36	62	0
3.1	7.34	18	20	8	98	103	3.9	132	22.1	6.8	0.7	5	1.8	2.5	23.6	84.4	2.4	0.4773	0.1677	12.0486	12.9	0.1	1.4	324	9	134	21	2.5	0.3	23.4	30.9	76	25.3	2.92	45	0
3.1	7.33	19	22	9.4	105	194	4.8	141	34.4	11.3	1.4	37	1.7	3.3	12.9	32.1	1.1	1.8476	0.5084	8.7916	12.4	0.3	9.7	404	14	65	21	3.5	0.3	30.4	32.8	93	15.8	3.71	73	1
3.1	7.33	14	18	6.7	113	159	4.3	141	26.5	8.4	1.9	44	1.9	4.3	25.8	41.2	2.6	1.3026	0.3354	6.1386	7.8	0.1	0.1	366	24	113	21	1.7	0.3	27.8	31.9	87	14.4	3.04	64	1
3.1	7.41	10	10	3.1	122	47	1.8	140	15.1	4.8	0.6	11	0.8	1	28.1	66	2.8	0.026	0.026	1.534	2.6	0	0	75	6	32	11	2.1	1	29.7	32	93	15.6	1.62	80	1
3	7.2	22	24	6.3	100	152	5.5	140	30.7	10	3.8	185	1.8	4.2	17.4	52.4	2	0.188	0.047	2.491	4.7	0	0	401	349	170	1381	1.5	0.7	28.1	32.6	86	14.3	3.57	82	1
3	7.37	14	28	8.5	104	109	2.9	143	39.5	13	1	16	2	2.8	35	28.7	3.7	1.247	0.406	12.76	14.5	0.3	0.4	398	433	1983	609	2.6	9.6	33.6	33	102	17.5	3.88	82	1
3	7.23	20	22	7.8	107	60	4.5	144	44	13.6	6.8	39	1.3	4.1	12.6	26.3	1.1	0.242	0.484	11.253	12.1	0	1	101	384	287	390	3.3	0.6	30.6	30.8	99	16.7	4.44	50	0
3	7.34	18	19	8.1	112	144	3.6	145	37.2	12.6	1.5	37	1.6	3	17.8	34.6	1.6	0.536	0.536	21.976	26.8	0	0	143	404	202	371	3.4	4.3	31.8	33.8	94	14.1	3.96	82	0
3	7.33	25	18	8	103	100	5.6	140	41.5	14.2	2.4	68	2.8	5	14.4	22.9	1.3	0.7172	0.5379	14.9634	16.3	0.1	0.3	440	142	548	367	3.1	2.3	31.6	34.2	92	14	4.49	82	1
3	7.36	16	28	7.4	100	121	3.4	141	44	15.6	0.6	5	1.1	3	14.1	25.4	1.3	0.616	0.2464	4.368	5.6	0.23	0.96	69	75	122	221	4	2.2	35.2	35.5	99	13.6	4.45	42	0
3	7.33	20	18	8	109	70	4.2	143	36.9	12.5	2.7	36	3	4.8	16.1	30.1	1.7	0.512	0.256	21.76	25.6	0	0	133	130	67	137	2.9	3.1	30.7	33.9	91	13.5	4.08	71	0
3	7.46	10	20	7.4	107	141	3.6	133	34	11	0.5	22	2	1.3	39.5	36.7	3.9	1.1271	0.6851	20.1773	22.1	0.2	0.3	130	85	175	132	2.6	7.1	26.9	32.3	83	16.4	4.08	69	1
3	7.17	16	17	6.3	112	110	3.7	141	31.7	10.4	1.3	27	2.2	4.2	15.6	43.4	1.5	0.513	0.285	3.705	5.7	0	0	55	70	146	117	2.4	2.5	33.1	32.8	101	16.2	3.14	65	0
3	7.42	16	28	9.6	96	124	4.5	135	34.7	11.3	1.4	30	2.4	3.9	13.7	26.6	1.2	2.013	0.366	15.372	18.3	0	1	366	73	149	112	2.9	1.3	29.3	32.7	90	17.7	3.86	71	0
3	7.26	18	27	8.3	101	134	5	141	36.8	12.1	1.4	24	2.2	3.7	24.5	31.6	2.5	1.749	1.113	9.858	15.9	0	0	649	73	149	112	2.9	1.3	25.1	32.9	76	20.7	4.82	80	1
3	7.34	17	22	8.3	102	309	4.6	136	43.4	15.3	2.1	49	2.3	3.6	17.6	31	1.6	1.5075	0.63	20.3175	22.5	0.2	0.1	250	311	129	108	3.3	1.1	32	35.4	91	15	4.79	64	0
3	7.29	12	20	7.3	103	62	4.3	131	36	11.9	0.9	14	1.9	2.1	15.7	36	1.4	0.2432	0.2128	3.3212	3.8	0.1	0.5	79	34	145	93	1.7	4.1	35.2	33.2	106	18.4	3.39	62	0
3	7.36	19	21	8	107	224	4.5	142	52.4	16.2	1.4	67	2.6	4.9	19.8	30.8	1.8	0.8732	0.3404	13.5568	14.8	0.2	0.1	55	30	278	89	2.6	7.9	28.4	30.9	92	14.7	5.71	62	1
3	7.31	18	24	8	99	117	4.5	136	46.8	14.7	9.5	28	1.7	4.6	15.4	28.7	1.4	0.7383	0.8988	30.1098	32.1	0.8	0.2	186	50	78	85	2.1	0.2	28.2	31.5	89	16	5.23	49	1
3	7.34	14	19	6.7	111	101	4.2	140	30.2	10.4	2.1	21	1.5	2.5	17.7	33.8	1.6	0.36	0.18	5.04	6	0	1	110	35	343	78	3	0.9	29.3	34.5	85	14.1	3.55	22	0
3	7.22	13	20	7.8	107	100	3.9	136	28.3	9.1	1.1	23	2.1	3.6	18.2	41.1	1.7	1.016	0.2667	11.3919	12.7	0.1	0.2	39	31	204	64	2.4	2.1	29.5	32	92	22.2	3.07	63	0
3	7.31	15	23	7.4	103	268	4.2	137	36.4	12.3	1	13	1.4	2.7	12.9	18.3	1.1	0.6972	0.3024	7.35	8.4	0.3	0.2	165	82	137	61	3.5	1.6	20.3	33.8	60	16.1	6.06	46	0
3	7.34	17	24	9.3	96	111	3.3	134	40.4	15.3	1	23	1.8	2.6	12.5	31.9	1.2	0.403	0.248	14.7715	15.5	0.2	0.3	135	92	61	57	4.9	1	32.1	37.9	85	11.9	4.77	55	0
3	7.36	16	22	8.8	104	94	4.4	138	32.4	10.5	0.8	39	2.1	1.8	16.5	28.5	1.5	0.206	0.206	18.746	20.6	0	1	540	24	1093	54	2.7	4.2	31	32.5	95	17.5	3.39	70	1
3	7.49	14	32	7.8	97	104	4.4	139	27.6	8.9	0.9	19	1.9	3.1	17.2	34.9	1.6	1.2496	0.5632	15.7696	17.6	0.1	0.1	331	29	70	49	2.7	0.6	26.9	32.3	83	14.1	3.31	82	1
3	7.25	13	25	7.7	98	333	2.9	133	34.3	11.3	0.9	9	1.6	4.2	14.1	33.6	1.3	1.2375	0.39	5.535	7.5	1.1	3.4	169	36	240	47	2.3	19.6	30.1	33	91	13.7	3.76	47	0
3	7.35	17	13	8	124	561	4	150	37.9	12.6	1.6	95	1.9	3.5	16	24.3	1.4	0.8106	0.4632	17.7753	19.3	0.8	0.5	516	51	98	47	2.6	0.6	31.9	33.2	96	14.6	3.95	60	0
3	7.4	17	27	9.1	99	117	5.7	137	31.5	9.9	0.7	44	2.2	3.8	12.3	20.8	1	1.1284	0.7688	10.3788	12.4	0.2	0.7	449	16	114	44	3.2	0.2	26.6	31.5	85	15	3.73	64	0
3	7.39	18	25	8.3	102	105	5	140	45.5	15.1	0.4	24	1.5	2.8	11.8	24.7	1	4.4892	1.0148	11.3004	17.2	2.1	0.2	473	32	72	44	2.9	0.4	32.7	33.2	98	13.3	4.62	59	0
3	6.98	17	10	4.5	114	243	4.2	137	60.5	19.6	1.7	25	1.3	5	23.1	69.7	2.2	2.74	1.644	41.648	54.8	0	1	149	13	42	43	2.9	0.3	33.2	32.4	102	13.5	5.91	50	1
3	7.34	20	25	9.2	91	255	4.9	131	30	9.6	6.4	23	1.7	3.3	13	56.2	1.2	0.5662	0.7748	13.5143	14.9	0.1	0.3	103	31	126	42	3.4	0.3	34.4	32.1	107	14.8	2.8	65	0
3	7.22	17	26	9.7	133	92	4.8	171	48.3	14.6	2	54	3	4.2	12.6	25.8	1.2	3.6015	0.6027	10.4517	14.7	0.3	0.1	114	21	98	41	2.2	0.3	29.5	30.3	97	15.7	4.96	64	1
3	7.44	16	27	9.6	100	236	4.5	138	29.7	9.5	2.1	31	1.8	4.8	12.3	23.9	1.1	1.892	0.7568	13.416	17.2	0.23	0.96	359	45	46	37	3.8	0.4	28.8	32.1	90	18.7	3.31	69	0
3	7.03	23	19	7.3	98	264	5.1	135	41.3	13.6	2	48	2	4.9	11	21.6	0.9	1.578	0.526	18.936	26.3	0	0	371	26	116	35	2.9	0.2	30	32.9	91	14.3	4.52	64	0
3	7.14	20	26	9.2	97	66	5.1	138	41.6	15	2.5	86	2.2	4.3	13.3	22.6	1.1	4.1583	0.8016	11.4395	16.7	0.6	1.1	324	23	119	33	2.9	0.5	31.3	36	87	16.7	4.78	67	0
3	7.36	5	31	8.5	99	88	4.3	131	35.1	11.2	3.3	12	2	3.2	16.1	36.9	1.7	0.225	0.525	5.85	7.5	0	0	203	14	68	30	3.3	0.5	30	31.9	94	17.2	3.73	66	1
3	7.42	17	33	8.3	88	157	3.3	135	33.1	11.2	0.4	18	1.7	3.2	12.1	21.8	1	1.674	1.612	27.621	31	0.2	0.2	768	35	404	21	3.6	0.4	30	33.8	89	19.5	3.74	30	0
3	7.32	20	23	8.4	103	261	5.5	140	35.5	10.9	4.1	33	1.4	2	17.2	30.8	2.1	5.776	0.456	7.448	15.2	1	6	231	9	54	21	2.8	0.5	30.5	30.7	99	22.1	3.57	70	0
3	7.34	17	36	8.9	98	172	4.4	147	39.9	13.4	6.9	26	1.6	3	14.3	28.8	1.2	0.3283	0.0784	4.4296	4.9	0.2	1.1	139	9	95	20	3.1	0.5	35	33.6	104	16.3	3.83	45	0
3	7.27	17	22	8.9	103	156	4.2	138	27.2	9.7	2	38	1.6	2.5	12.9	21.6	1.1	0.216	0.108	6.264	10.8	0	0	203	24	83	19	3.5	0.3	30.5	35.7	85	14.7	3.19	82	0
3	7.41	11	35	8.6	102	106	4.6	143	40.5	12.8	0.3	22	1.9	3.2	12.2	28.3	1	3.045	0.735	17.01	21	1	0.1	509	22	58	18	2.9	0.4	32	31.5	101	14.2	4	59	1
3	7.42	17	19	7.8	98	172	5.5	128	28.2	9.4	1.4	24	1.3	2.6	17.6	35.7	1.6	0.2278	0.335	6.1238	6.7	0.1	0.1	216	14	68	17	2.8	0.5	29.7	33.3	89	15.1	3.17	53	0
3	7.34	12	27	8.7	99	276	4.5	133	30.8	10	0.6	19	1.8	2.8	12.1	20	1	0.888	1.554	19.314	22.2	0	1	367	22	78	16	3.3	0.3	25.9	32.4	80	17.6	3.85	87	0
2.96	7.35	18	23	8.4	106	187	3.8	143	34.9	11.8	1.2	25	2.2	2.9	12.2	21.5	1.1	1.3908	0.4087	4.0565	6.1	0.2	3.9	49	237	56	292	3.6	0.6	34.4	33.9	101	14.2	3.44	64	0
2.96	7.33	21	19	9	98	469	6	132	40.1	13.6	0.7	21	2	4.3	14.4	71.6	1.4	2.015	0.689	10.153	13	0.3	0.8	253	71	69	257	3.6	0.5	29.8	34	88	13.3	4.57	58	0
2.96	7.35	23	17	8.6	109	124	3.5	145	22	7.3	1.5	90	2	6.4	13.6	30.1	1.2	0.88	0.528	13.024	17.6	0	0	82	160	397	191	2.2	12.2	30.4	33	92	19	2.39	78	0
2.96	7.46	15	27	7.9	93	333	4.5	130	31	9.8	1.6	59	2.1	2.8	18.3	34.5	2.3	0.492	0.164	15.58	16.4	0	0	335	88	235	153	2.1	0.5	25.8	31.5	82	16.7	3.79	68	0
2.96	7.48	19	20	5.2	103	122	2.2	140	28.9	10.4	0.6	7	1.1	2.1	18	31.2	1.6	0.693	0.3465	9.3765	10.5	0.4	0.4	95	27	361	150	3.8	2.4	36.7	35.9	102	15.8	2.82	49	0
2.96	7.36	17	19	8.3	112	54	5.9	142	30	9.7	1.5	39	1.9	2.5	12.2	34.6	1	0.48	0.222	5.28	6	0.2	0.2	30	146	138	144	4	0.3	30.6	32.1	95	16.9	3.15	39	0
2.96	7.41	19	26	9	93	147	2.7	135	37	13.5	0.7	9	1.4	1.1	13.3	29.3	1.1	0.99	0.235	1.255	2.5	0.2	0.5	99	59	97	137	4.2	1.7	33.6	36.6	92	12.8	4.03	33	0
2.96	7.43	13	30	8.3	96	124	3.6	135	22.7	7.9	1.9	51	2.2	3.5	13.1	26.7	1.1	0.165	0.165	0.945	1.5	0	0	14	209	124	133	3.4	2.3	29.1	35	83	16.5	2.73	84	0
2.96	7.44	22	26	9.6	91	88	5.4	134	39	12.6	7.6	35	2.3	4.3	12.8	47.1	1.1	1.3752	0.2376	5.4792	7.2	0.4	1.1	178	73	520	112	3.4	1.3	40.4	32.3	125	15	3.12	50	0
2.96	7.44	13	29	8.9	104	170	4.7	141	34.5	11.4	1.5	34	1.9	3.8	12.5	24.9	1	2.03	1.74	9.28	14.5	0	5	352	73	149	112	2.7	1.3	29.2	33	89	15.6	3.9	78	0
2.96	7.07	17	24	8.5	105	225	3.4	143	34.4	10.3	1.4	16	1.9	6.3	13.4	30.4	1.2	1.674	0.434	9.9076	12.4	1.3	1.8	337	73	149	112	2.9	0.4	24.5	30	82	17.5	4.21	70	0
2.96	7.14	16	15	8.7	116	69	7.2	140	37.8	12	3	47	1.7	5	12.7	29.6	1.1	1.496	0.248	6.128	8	0.2	1.4	197	73	149	112	2.9	1.3	37.1	31.7	117	16.8	3.23	74	0
2.96	7.35	15	25	8.2	102	96	4.2	138	26.9	8.6	0.4	16	1.7	3.4	17.8	36.3	1.8	1.3112	0.298	5.78865	7.45	0.4	0.3	584	169	202	107	2.8	1.1	24	31.9	75	17.3	3.57	35	1
2.96	7.43	20	20	8.3	98	240	5	133	27.2	8.5	5.4	102	2.5	4	48.9	55.6	5.3	0.8544	0.178	7.8587	8.9	0	0	235	160	195	92	2.7	0.4	28.6	31.1	92	15.8	2.96	84	0
2.96	7.48	16	30	11.4	97	139	4.8	137	32.2	10.4	1.3	45	1.9	4.7	13.5	21.1	1.2	0.204	0.204	6.392	6.8	0	0	271	72	65	91	3	0.7	32.9	32.3	102	22.1	3.17	77	0
2.96	7.26	17	24	8.4	105	176	4	142	31.6	10.7	8.5	114	2.9	5.3	14.2	26.2	1.3	1.1895	0.6405	16.3785	18.3	0.2	0.2	251	68	118	84	3.4	0.3	24.8	34	73	16.3	4.33	76	0
2.96	7.41	20	22	7.3	99	93	3.4	138	28.9	9.6	0.2	19	1.8	3.4	11.8	30	0.9	1.413	1.256	10.99	15.7	0	0	300	49	1101	82	2.6	0.6	30.5	33.2	92	15.7	3.15	48	0
2.96	7.5	12	26	8.9	104	141	4	138	24.4	7.9	1.7	66	2.3	3.2	16.7	39.9	1.5	0.4865	0.3753	12.8992	13.9	0.1	0.8	182	68	263	65	2.2	0.8	31.3	32.5	97	17.2	2.53	80	0
2.96	7.44	19	22	7.6	101	210	4.4	138	35.4	12	1.8	40	2.1	4.8	13.1	23.7	1.2	0.603	1.005	17.688	20.1	0	0	385	44	386	62	2.2	0.4	29.2	33.8	86	14.3	4.1	59	0
2.96	7.34	24	19	10.5	98	100	6.3	135	35.9	11.3	8.9	71	2.8	8	13.8	50.9	1.3	1.1562	0.5002	6.3468	8.2	0.5	1.8	320	62	222	55	3.7	0.4	31	31.6	98	15.9	3.65	44	0
2.96	7.3	12	30	9.2	98	114	5	135	27.8	8.9	3.1	74	2.1	4.6	19.5	28.3	1.8	1.4706	0.7482	10.6038	12.9	0.2	0.3	407	69	159	53	3	0.8	26.7	31.9	84	17.8	3.32	74	1
2.96	7.36	13	24	8.8	102	95	5.3	134	32.8	10.4	1.6	20	1.6	4.9	14.4	26.1	1.3	0.835	0.167	14.4455	16.7	0.1	7.4	732	72	1937	53	2.4	1	28.9	31.6	91	15.7	3.59	70	0
2.96	7.35	19	23	9.2	96	153	5.7	132	32.9	10.6	2.9	55	2.3	3.7	13.3	31.6	1.2	0.684	0.204	4.914	6	1.7	1.6	183	22	136	47	4.1	1.4	28.6	32	89	18.3	3.69	47	0
2.96	7.56	14	27	10.4	103	109	3.4	141	36.8	12.9	1	4	2.1	1.7	14.5	23.3	1.4	2.7588	0.2565	2.3712	5.7	1.2	4.3	294	41	118	46	2.9	0.4	32.1	35.1	91	12.7	4.02	53	0
2.96	7.46	18	27	9.1	104	42	4.5	144	40	12.6	1.4	31	1.8	4.3	13.9	34.7	1.4	1.0282	0.7954	7.6436	9.7	0.7	1.8	291	19	136	45	3.4	0.9	27.3	31.6	87	14.2	4.63	53	0
2.96	7.32	14	34	8.6	96	101	5.7	138	35.6	10.7	1.4	26	3	3.6	14	30.1	1.3	1.8357	0.5064	18.6313	21.1	0.2	0.4	398	26	108	44	3.3	0.2	26.4	30.1	88	16.9	4.06	62	0
2.96	7.46	15	23	9.5	98	141	4.3	132	34.5	12.2	2.3	5	1.7	4.3	12.7	22.6	1	2.0878	0.8176	11.461	14.6	0.7	1	354	78	396	42	3.4	27.2	28.7	35.5	81	17	4.26	69	0
2.96	7.34	16	24	8.8	100	118	3.9	136	25.6	9.1	1.4	26	1.6	3.9	13.4	25.3	1.1	0.087	0.013	0	0.1	0	0	11	81	213	40	3.8	1.7	31.2	35.4	88	15.2	2.9	66	0
2.96	7.33	26	21	10.3	98	238	4.7	140	43.3	14.3	0.9	18	1.8	4.6	12.8	26.5	1.1	2.869	0.798	14.706	19	1	2.3	505	17	149	35	2.5	0.9	31	33.1	94	13.3	4.63	64	0
2.96	7.46	18	30	9.5	101	233	3.8	145	33.5	11	1.3	24	2.1	2.3	15.6	150	1.6	1.2198	0.5928	9.4734	11.4	0.2	0.8	192	17	72	35	2.9	1.3	31.2	32.7	95	16	3.51	61	0
2.96	7.39	16	22	8.3	110	155	3.3	145	26.5	8.7	0.8	22	1.6	3.5	13.6	31.1	1.2	0.5525	0.286	5.629	6.5	0.1	0.5	270	39	274	35	3.5	0.7	27.7	32.7	85	16.5	3.12	48	0
2.96	7.47	14	26	9.5	105	89	3.5	141	32.2	10.6	1.6	31	1.5	3.8	18.9	37.6	1.8	1.274	0.392	4.921	7	0.3	5.6	189	18	76	34	3.8	0.5	28.9	32.8	88	15.4	3.66	64	0
2.96	7.42	23	23	9.3	97	213	5	138	39.1	13.2	11	60	1.4	5.1	12.7	23.1	1.1	2.3086	0.7469	6.2662	9.7	0.9	3	240	45	161	31	3.3	0.3	29.9	33.7	89	16.3	4.4	66	0
2.96	7.39	13	30	9	101	92	4.2	140	38.8	13	1	22	1.9	4	12.6	26.4	1.1	1.3156	0.299	2.8842	4.6	0.4	1.8	23	17	82	30	2.9	0.3	31.3	33.5	94	13.2	4.15	64	0
2.96	7.34	16	21	8.4	105	108	4.8	137	32.3	10.4	2.2	48	1.8	4.4	13	30	1.1	0.8463	0.1911	2.5116	3.9	1.5	7.6	166	14	79	30	2.9	0.8	32.3	32.1	101	13.9	3.21	46	0
2.96	7.35	17	20	8.1	102	234	4	135	31.3	10.9	0.5	15	1.9	4.3	12.6	38.1	1.1	0.9126	0.3861	10.3311	11.7	0.4	0.2	267	15	87	29	2.8	0.4	28.9	34.8	83	12.4	3.77	69	0
2.96	7.46	10	29	9.4	105	169	4.1	140	32.4	11	0.8	15	1.9	3.6	12.4	24.9	1	1.2118	0.2555	5.6867	7.3	0.2	1.8	189	28	76	28	2.9	0.5	31.6	33.9	93	13.7	3.48	78	0
2.96	7.21	17	17	7.7	109	171	4.1	139	44.4	14.8	0.3	9	1.5	4.6	12.4	22.3	1	1.6836	0.2928	16.1955	18.3	0.2	0.5	374	26	117	28	3.5	0.2	28.9	33.3	87	13.9	5.11	51	0
2.96	7.2	19	31	8.9	93	136	3.4	140	38.7	13.2	2.5	52	2	3.8	17.8	36.3	1.8	2.336	0.832	12.688	16	0.3	0.6	363	15	95	27	2.9	0.6	29.5	34.2	86	13.2	4.48	67	0
2.96	7.4	14	25	8.7	100	183	3.9	135	27.6	9.3	0.8	31	1.8	4.1	13.2	48.8	1.2	1.0176	0.4352	4.9152	6.4	0.2	0.2	217	35	75	27	3	0.6	28.5	33.9	84	13.5	3.28	69	0
2.96	7.45	12	28	8.2	103	97	3.6	139	31.3	9.9	1	21	1.5	2.8	13.5	28.1	1.2	1.7094	0.9546	18.4482	22.2	0.4	4.4	408	97	92	27	2.4	0.4	28.8	31.6	91	14.4	3.43	59	0
2.96	7.36	19	22	7.5	99	239	4	136	33.5	11	5.1	35	1.9	5.7	13.7	31.4	1.2	0.378	0.378	4.662	6.3	0	0	191	26	344	24	2.1	0.3	31.2	32.8	95	15.8	3.51	58	1
2.96	7.29	18	31	11.2	90	139	4.2	135	35.2	11.8	9.3	56	1.9	4.4	13.9	27.7	1.2	2.2885	0.6325	7.4175	11.5	0.6	9.5	166	9	145	20	4.3	0.4	30.8	33.6	92	17.7	3.83	66	0
2.96	7.37	17	24	8.8	97	195	5.1	133	35	10.5	2.6	27	1.9	2.7	28.4	51.2	2.9	1.4178	0.765	7.65	10.2	0.7	3	355	10	110	20	3.2	0.8	28.4	30	95	19.5	3.7	63	0
2.96	7.38	15	26	7.2	101	302	3.5	138	30.3	9.9	2.6	27	1.5	3.2	14.7	28.8	1.5	1.508	2.08	9.243	13	0.7	0.6	225	6	247	20	2.2	0.5	28.7	32.7	88	15.5	3.46	69	1
2.96	7.31	11	35	9.2	103	98	3.9	145	34.2	11.4	0.5	14	1.8	3	14	34.5	1.2	0.5254	0.2556	6.248	7.1	0.2	0.8	186	18	58	20	3.3	0.7	33.1	33.4	99	14	3.46	83	0
2.96	7.39	12	27	7.1	108	85	4.2	143	33.3	11.4	0.6	7	1.5	2.7	13.6	75.6	1.3	2.254	0.184	1.932	4.6	1	4	200	31	140	20	3.2	0.3	29.7	34.3	87	16.5	3.84	34	0
2.96	7.38	24	21	8.1	96	312	7.4	134	24.7	7.2	7	142	1.5	9	14.5	28.2	1.5	1.564	0.46	6.532	9.2	0	4	320	18	174	19	2.8	0.2	27.6	29.1	95	18.8	2.61	41	0
2.96	7.41	15	29	8.5	97	126	3.2	138	40.7	13.5	3.2	58	1.8	3.8	12.5	27.8	1.1	1.491	2.13	16.401	21.3	0	3	334	20	107	19	2.5	0.5	31.4	33.3	94	16.2	4.32	64	0
2.96	7.39	15	27	8.3	100	333	4.5	137	38.7	13	1.1	20	1.9	3.9	12.4	29	1.1	1.3612	0.4346	5.9286	8.2	0.7	5.1	285	18	133	19	2.9	0.3	27.3	33.5	82	13.8	4.74	67	0
2.96	7.13	29	10	8.3	103	393	5.9	136	33.9	10.5	5.4	86	2.3	9.4	13.5	27.1	1.2	1.3098	0.354	9.8884	11.8	0.5	1.5	247	12	125	19	2.9	0.5	26.9	30.9	87	17.7	3.9	57	0
2.96	7.22	12	24	7.3	104	89	4.5	130	39.5	14.3	0.9	10	1.5	2.8	12.9	29.6	1.2	4.1769	0.5593	6.8425	11.9	1.1	1.6	364	13	84	19	3.2	0.2	34.6	36.2	96	13.7	4.14	53	0
2.96	7.37	30	18	8.9	78	707	5.3	121	48.7	17	1.2	27	2.9	5.9	9.3	22.5	0.9	1.3442	0.3861	12.4982	14.3	0.4	0	415	21	189	18	4.2	0.7	30.3	34.9	87	13	5.61	51	0
2.96	7.26	13	25	10.1	98	126	6.5	129	39.5	13.8	0.8	17	2.2	3.7	17.8	36.3	1.8	4.131	0.799	11.696	17	0.6	1.6	446	10	113	17	4	0.2	33.5	34.8	96	13	4.1	54	0
2.96	7.35	18	27	10.7	99	170	4.9	139	35.6	12	12.6	49	2.3	6.4	11.9	23.1	0.9	1.7088	0.2752	4	6.4	1.3	5.1	331	24	92	17	3.4	0.2	31.5	33.8	93	13.7	3.82	35	0
2.96	7.52	17	22	9.2	101	95	4.8	135	30.6	10.5	0.5	11	1.6	5.3	13.9	37.9	1.3	0.779	0.1394	2.6363	4.1	0.7	12.6	298	21	125	17	3.7	0.3	29.6	34.2	87	15.7	3.54	26	0
2.96	7.44	18	25	9.7	105	151	4.5	143	31.5	10.5	0.9	53	2	2.2	12.8	21.3	1	1.224	0.4896	12.6576	14.4	0.1	0.1	293	18	81	17	3.3	0.3	29.1	33.5	87	14.5	3.62	61	0
2.96	7.43	18	16	10.1	107	224	5.7	135	37.3	12.7	2.7	97	2.8	3.5	18.9	36.2	2.4	0.7728	0.3584	4.3624	5.6	0.5	1.4	131	14	149	17	2.9	0.8	34.1	34	100	17.1	3.72	77	0
2.96	7.4	22	25	9.3	90	95	6	131	30.6	10.2	5.1	62	2.3	6	13.2	29.2	1	1.3969	0.488	3.5563	6.1	1	9.9	194	9	75	16	3.8	0.8	31.7	33.5	95	18	3.23	47	0
2.96	7.48	14	16	7.8	109	71	3.1	136	26	8.7	0.6	19	1.8	3.3	13.4	41.3	1.2	0.667	0.029	1.885	2.9	1	3	54	13	139	16	2.6	0.3	29.2	33.3	88	16.4	2.97	26	0
2.96	7.37	14	34	9.3	96	112	4.4	140	30.1	9.4	3.4	13	1.7	3.3	14.7	47.4	1.3	1.0318	0.385	6.1292	7.7	0.3	1.6	304	6	39	15	2.6	0.2	24	31.1	77	17.8	3.9	65	0
2.96	7.45	11	28	7.9	99	156	4.4	134	27.2	9.2	1.1	20	1.6	3.8	20.2	33.6	2.6	1.0414	0.3429	10.922	12.7	0.2	2.9	427	9	124	15	2.9	0.7	30.4	33.9	90	14.3	3.03	73	0
2.96	7.34	20	21	8.5	110	277	3.3	148	31.9	9.8	3.7	42	1.4	1.4	13.7	25.4	1.2	1.404	0.432	8.64	10.8	0	2	201	21	257	14	2.5	0.4	29.2	30.9	95	18.2	3.37	75	0
2.96	7.36	18	23	10	92	407	4.1	129	44.5	15.4	1.4	15	1.7	3.1	12.2	22.5	1	1.786	0.475	6.9255	9.5	1.2	2.1	264	17	74	13	3.3	0.7	28.9	34.5	84	12.5	5.31	52	0
2.96	7.48	20	23	8.9	95	78	4.6	133	30.1	9.9	3.4	110	2.5	5.4	13.9	29.4	1.3	0.7488	0.4368	8.9336	10.4	0.6	2.1	473	6	93	11	2.9	0.3	31.9	33	97	17.8	3.12	67	1
2.96	7.49	11	30	8.5	104	137	4	141	28.3	9.5	1.2	19	1.9	3.5	26	26.6	2.5	1.3566	0.4284	8.3538	10.2	0.3	0.3	168	12	97	11	3.6	0.5	38.8	33.5	116	15	2.45	56	0
2.96	7.42	18	24	8.3	100	100	5.4	137	31.1	10.4	1.4	29	2.3	4.2	12.3	30.6	1.1	0.9213	0.4565	6.8724	8.3	0.4	0.2	372	73	100	10	2.3	0.4	29.8	33.5	89	15	3.49	79	0
2.96	7.27	20	16	10.4	98	290	6.1	128	15.8	5.1	2.8	125	2.6	5.5	12.3	29.2	1.1	3.131	0.93	11.067	15.5	0.4	2	415	9	105	9	2.4	0.1	30.4	32.4	94	18.3	1.69	54	0
2.96	7.4	9	31	6.9	109	90	4	145	23	6.6	1.8	8	1.3	1.6	17.2	55.6	1.6	1.4112	0.3168	12.2688	14.4	0	2.8	371	6	236	7	1.1	0.3	29.6	28.6	104	22.8	2.22	50	1
2.96	7.27	15	21	10.4	117	439	3	150	21.8	6.8	2	41	1.2	1.1	14.1	33.8	1.4	2.512	0.471	10.833	15.7	0	1	335	4	87	5	2	0.3	28.2	31.2	91	17	2.41	54	0
2.9	7.35	15	24	10.6	107	150	3.3	143	30	12.8	1.5	23	1.2	3.9	17.1	150	1.9	0.176	0.176	3.608	4.4	0	1	44	120	45	179	2.5	0.7	30.8	35.9	86	13.6	4.16	84	0
2.9	7.34	35	12	8.4	94	471	5.6	135	33.9	11.3	3.9	20	1.7	5.5	14.9	103	1.5	0.637	1.001	7.007	9.1	0	0	235	73	149	112	3.3	1.3	30.2	33.5	90	17.3	3.75	43	0
2.9	7.32	24	24	7.3	97	309	4.7	140	31.5	10.2	8.2	41	1.7	3.1	12.4	24.9	1	1.7408	0.448	10.4192	12.8	0.1	1.4	253	73	149	112	2.9	1.3	33	32.3	102	15.1	3.08	73	0
2.9	7.37	11	23	8	108	88	4.4	138	24.9	7.9	1	22	1.5	2.4	13.6	31.6	1.2	0.365	1.825	29.565	36.5	0	0	509	73	149	112	2.9	1.3	28.9	31.6	92	16	2.72	54	0
2.9	7.23	14	25	7.4	109	125	3.9	144	44.1	15.4	1.1	18	1.6	4.1	16.6	30.8	1.9	2.919	5.004	28.773	41.7	0	1	119	73	149	112	2.9	1.3	30.1	34.9	86	13.7	5.12	42	0
2.9	7.38	15	25	8.2	103	95	4	139	43.6	14.5	1.6	37	1.5	1.2	13.8	32	1.2	0.576	0.24	0.224	1.6	0	0	56	24	27	83	3.4	0.6	31.9	33.3	96	13.4	4.55	64	1
2.9	7.37	16	24	8.9	102	117	4.4	138	30.8	10.1	1.3	69	1.9	2.2	14	50.4	1.2	0.4582	0.4345	6.9362	7.9	0.2	0.8	346	40	116	81	2.4	0.7	23.9	32.7	73	18.6	4.21	57	1
2.9	7.35	19	27	9.9	98	144	5.4	139	41.4	14.2	2	60	2.9	3.8	13.6	21.9	1.2	0.185	0.111	2.516	3.7	1	1	162	66	252	80	4.9	0.9	31.4	34.3	91	15.1	4.52	76	0
2.9	7.34	17	25	9.4	109	126	3.6	147	34.2	11.1	0.6	18	1.9	2.9	12.7	29.7	1.2	0.236	0.059	4.897	5.9	0	1	269	30	183	72	2.1	0.4	29.3	32.4	90	15.7	3.79	65	0
2.9	7.43	14	28	7.8	89	71	4.1	127	31.8	10.9	2.6	25	1.4	2.3	17.9	32.9	1.7	0.785	0.471	11.461	15.7	0	1	216	26	85	70	3.4	0.5	32.6	34.3	95	13.4	3.34	53	0
2.9	7.48	12	24	7.3	107	121	4.2	139	37.5	12.6	0.9	10	1.5	3.6	16.8	31.9	1.6	1.44	0.6	1.8	4	0	2	73	15	120	65	2.1	3.8	36.1	33.6	107	15	3.49	65	1
2.9	7.27	19	24	8.6	96	143	5.8	133	40.5	13.7	2.4	29	2.4	3.5	11.7	24.9	1	1.6472	0.284	12.212	14.2	0.2	0.2	258	35	104	63	2.9	0.4	28.4	33.9	84	16.3	4.83	64	1
2.9	7.44	17	25	8.6	105	144	5.2	142	39.5	12.7	4	49	1.4	2.9	26.3	29.9	2.6	1.16	0.3625	12.847	14.5	0.2	0.7	222	22	78	58	3.5	0.6	32	32.3	99	15.5	3.98	81	0
2.9	7.4	17	25	8.4	98	141	3.8	136	22.8	8.4	0.7	37	2.1	3	12.6	26.9	1.1	0.16	0.04	0	0.2	0	0	72	58	106	55	3.5	1.6	29.2	36.6	80	18.2	2.86	73	0
2.9	7.45	21	19	8.6	97	341	4.8	132	25.3	8.3	3.8	58	1.7	3.4	13.6	19.5	1.2	1.024	0.256	4.864	6.4	0	0	374	40	83	48	3.5	1.1	27.3	32.7	84	16.7	3.03	67	0
2.9	7.4	19	28	6.8	96	235	3	140	43.4	14.7	2.3	40	1.9	3.7	19.5	34.8	2.7	0.546	0.546	24.57	27.3	1	4	175	16	394	43	2.1	2.7	27.5	34	81	18.2	5.37	84	1
2.9	7.37	21	17	7.9	109	156	6	141	26.9	7.9	1.5	7	1.8	6.8	20.7	48.7	2.8	1.551	0.2115	12.2952	14.1	0.2	0.1	89	49	167	41	2.1	7.5	30.9	29.5	105	18	2.57	54	1
2.9	7.38	27	12	6.8	103	152	4.7	137	32.3	10.7	6.6	82	2.2	7.2	13.1	32.1	1.1	3.069	0.341	28.303	34.1	0	0	106	21	149	35	2	0.4	28.2	33.2	85	17.2	3.8	77	0
2.9	7.54	18	25	8.2	89	208	4.2	128	31.9	11.3	1.2	24	1.3	3.2	13.9	24.5	1.2	1.2512	0.016	0.2832	1.6	1.7	1.4	63	29	277	34	3.3	1.1	32.5	35.4	92	15.2	3.48	62	0
2.9	7.34	14	25	7	98	85	3.5	133	32.8	10.6	0.6	14	1.3	2.6	13.2	28.2	1.1	1.449	1.242	18.009	20.7	0	0	336	28	175	31	2.3	0.3	30.7	32.3	95	16.9	3.46	73	0
2.9	7.35	17	25	9.4	92	419	3.5	130	42.8	12.2	6.4	20	1.6	3.5	46.3	50.7	5.4	1.54	0.72	7.19	10	1.5	4.1	344	15	226	30	2.9	1	22.9	28.5	80	19.9	5.32	50	0
2.9	7.31	11	27	5.7	111	85	4.7	144	30.8	10.3	0.9	24	1.6	3.2	13.7	31	1.2	2.0832	0.168	8.4112	11.2	0.4	4.3	351	34	299	30	1.3	0.4	27.1	33.5	81	16.4	3.8	82	1
2.9	7.59	15	38	7.9	96	115	2.1	147	33.8	11.1	1	27	1.6	1.4	17.1	20.1	1.6	8.162	0.424	1.908	10.6	0	0	206	20	157	27	2.8	0.3	32.1	32.7	98	16.7	3.44	85	0
2.9	7.44	29	14	9.7	96	181	5.1	134	31	10.6	17.2	81	2	4.7	13.9	23.9	1.3	0.4896	0.1394	2.754	3.4	0.2	0.3	133	15	303	26	3.4	0.2	30.8	34.2	90	14.8	3.44	39	0
2.9	7.3	17	18	6.7	97	509	4.1	128	37.7	12.7	2	60	2.2	3.9	13.1	32.4	1.1	0.658	0.658	29.61	32.9	0	0	63	16	123	25	2.2	1.4	31.3	33.6	93	14.3	4.05	54	0
2.9	7.4	13	27	9.5	100	151	3.8	136	40.8	14	1.5	23	1.4	0.9	13.1	29.3	1.1	0.852	0.213	14.697	21.3	0	0	302	28	59	25	4.1	0.8	29.2	34.4	85	13.3	4.8	41	0
2.9	7.33	18	24	8.1	104	183	4.7	141	38.7	12.4	1.4	49	1.8	4.1	12.7	27.4	1.1	0.364	0.273	6.279	9.1	0	0	154	29	85	25	1.6	0.3	28.2	32	88	17.4	4.4	64	1
2.9	7.44	20	28	9.5	101	70	5.2	144	45.3	13.1	7.8	36	2.4	4	14.5	31.2	1.3	0.531	0.225	8.208	9	0.2	0.2	156	8	268	23	4	2.5	28.9	28.9	100	21.8	4.54	51	0
2.9	7.26	13	18	5.5	112	72	3	140	29.5	9.7	0.9	36	1.2	2.7	19.6	49.1	2.4	0.9768	0.4662	5.9348	7.4	0.1	0.2	173	35	46	21	2	0.4	30	32.7	92	19.3	3.22	57	1
2.9	7.48	13	32	9.2	97	95	4.6	137	27.7	8.7	1	28	1.8	4.2	15.8	27	1.7	1.9723	0.7824	12.8933	16.3	0.6	3.3	334	32	113	19	2.9	0.9	23.9	31.3	76	17.4	3.62	75	0
2.9	7.34	35	17	10.2	91	102	3.9	139	52.4	16.5	9.5	45	2	6.3	14.2	53.6	1.2	0.8235	0.3645	12.0825	13.5	0.2	1.5	300	11	143	18	4.6	0.4	28.1	31.5	89	14.1	5.88	61	0
2.9	7.36	20	31	9.1	94	434	8.3	137	33.7	9.9	4.6	92	2.3	2.8	17	150	1.9	0.56	0.56	25.48	28	0	0	554	23	132	16	2	0.2	30.9	29.5	105	16.8	3.22	81	0
2.9	7.34	16	24	8	103	210	6.3	137	30.7	10.4	2.7	62	2.1	3.1	13.3	24.1	1.1	1.48	0.925	15.725	18.5	0	1	228	8	76	16	4.7	0.3	32.9	33.8	98	15.2	3.16	80	0
2.9	7.32	13	23	9.9	100	97	3.1	133	25.7	8.7	1.1	22	1.6	3.7	32.6	54.6	3.5	0.728	0.559	11.648	13	0.4	0.2	363	9	302	14	2.5	0.2	28.2	34	83	14.1	3.1	49	0
2.9	7.32	27	22	6.2	98	31	5.5	141	45.8	14.7	8.7	54	1.2	6.1	13.8	29.6	1.2	0.904	0.452	18.08	22.6	0	0	178	9	60	12	2.9	0.4	34	32	106	17.7	4.32	84	0
2.8	7.01	19	15	5.9	111	187	3.7	141	38.2	12.2	0.7	42	2.7	5	24.8	44.4	2.5	2.587	0.995	6.766	19.9	0	0	379	432	118	632	1.6	1.2	31.1	32	97	13.9	3.92	31	0
2.8	7.37	20	22	9.1	106	143	4	144	39.8	12.9	0.9	28	1.6	3.3	12.9	21	1.1	0.5984	0.2464	7.92	8.8	0.2	0.3	273	371	341	562	3.2	1.8	30.7	32.4	95	12.9	4.2	76	0
2.8	7.31	16	25	8.5	101	176	5.8	136	29.8	9.4	1.6	55	1.6	5.4	12.8	30.4	1	0.642	0.107	5.564	10.7	0	0	229	77	45	240	3	0.8	26.4	31.6	83	20.5	3.58	44	0
2.8	7.17	17	16	7.3	109	98	3.1	139	30.9	10.9	2.7	49	1.5	3.1	15.6	35.9	1.7	0.23	0.184	3.128	4.6	0	0	97	102	207	177	2.6	1.7	30.7	35.4	87	13.3	3.56	48	0
2.8	7.32	17	21	8.4	106	94	4.4	140	36	12.5	1.8	42	1.7	3	14.4	28.2	1.4	4.732	1.638	11.466	18.2	0	1	76	112	127	142	2.7	1.3	32.6	34.6	94	14	3.82	76	0
2.8	7.2	21	19	7.4	101	111	6.8	134	33.1	10.8	3.3	27	1.5	3.8	13.3	24.4	1.2	1.896	1.422	15.642	23.7	0	1	513	73	149	112	1.7	1.3	32.1	32.6	98	16.6	3.36	66	0
2.8	7.34	17	22	8.4	102	220	4.3	137	42.3	14.6	1.4	31	1.9	3	12.2	27.4	1	1.43	0.5577	12.1836	14.3	0.4	0.6	356	73	149	112	2.9	1.3	30.2	34.5	88	14.6	4.83	64	0
2.8	7.41	15	27	8.2	116	288	4.4	154	35.3	11.5	1.3	36	2.3	3.8	15	32.2	1.4	0.574	0.3936	15.416	16.4	0.1	0.1	344	73	149	112	2.9	1.3	30	32.5	93	17.4	3.81	64	1
2.8	7.17	21	18	8.2	110	469	5.8	143	36.7	10.8	2	29	1.8	5.8	15.3	32.1	1.6	0.9462	0.6142	15.023	16.6	0.1	0	259	51	150	97	2.7	0.5	27.3	29.5	93	17.4	3.97	79	1
2.8	7.3	21	20	7.7	96	114	2.4	135	35.2	11.7	0.6	5	1.8	2	15	25.1	1.3	0.6273	0.5166	11.0946	12.3	0.2	0.3	156	30	149	83	3.5	1.3	32.2	33.2	97	13.8	3.63	48	0
2.8	7.38	8	35	7.8	96	135	3.7	135	39.4	12.9	0.8	12	2.1	2.4	14.8	28.1	1.4	0.516	0.2709	12.0357	12.9	0.1	0.4	138	124	111	78	2.5	0.8	30.3	32.7	93	13.8	4.25	59	0
2.8	7.3	13	29	6.2	101	96	3.7	139	32	11	1.4	17	1.2	2.1	14.9	35.8	1.3	0.255	0.045	0.57	1.5	0	0	335	75	54	77	2.6	0.4	33.8	34.4	98	16	3.26	43	0
2.8	7.42	21	28	8.6	90	373	5.1	134	30.8	9.4	4.3	73	2.5	4.1	14.2	28.3	1.2	2.67	0.7476	23.0955	26.7	0.3	0.3	482	28	421	73	2.2	5.5	22.8	30.4	75	19.3	4.11	49	0
2.8	7.46	22	20	9.8	105	131	5.4	142	48.1	17	1.4	49	2.2	2.7	15.4	27.7	1.6	1.6458	0.4431	18.99	21.1	0.1	0	143	22	81	73	4.2	1.8	30.9	35.4	87	13.6	5.52	82	1
2.8	7.34	13	19	8.6	94	101	6.1	120	24.4	8.7	1.4	40	1.5	3.9	24	40.4	2.3	0.496	1.984	21.824	24.8	0	0	141	40	160	68	3.1	10.2	38.7	35.7	108	20.7	2.25	66	0
2.8	7.35	19	22	8.9	97	233	4.4	134	36.9	12.3	3	76	2.1	3.8	15.5	38.7	1.4	1.1076	0.5148	13.8996	15.6	0.1	0.4	147	65	517	65	3.2	9.4	30.1	33.2	91	15.2	4.07	64	0
2.8	7.48	18	23	8.8	96	118	4.8	132	27.6	9.2	6	62	2.8	3.9	18.9	34.6	1.8	1.1438	1.064	10.7198	13.3	0.1	2.7	126	30	123	58	3.1	6.7	37.6	33.4	113	19.1	2.45	48	0
2.8	7.12	14	16	6.5	113	86	4	139	31.2	10.8	1.5	21	1.1	3.9	13.2	23.3	1.1	0.171	0.036	0.621	0.9	0	2	175	55	59	57	2.8	0.8	31.5	34.6	91	18.8	3.42	54	0
2.8	7.39	16	21	8.2	107	100	3.7	140	47	15.7	1.3	34	2.5	2.7	20.6	39.6	2.7	1.512	0.378	9.702	12.6	0	0	182	24	134	53	2.9	6.7	31.8	33.4	95	15.1	4.94	68	0
2.8	7.41	19	23	5.4	83	98	8.3	117	38.9	13.7	1	32	1.4	2.1	29.4	36.6	5.4	0.432	0.54	5.184	10.8	0	0	242	32	70	47	2.1	0.7	30.7	35.2	87	16.3	4.46	80	1
2.8	7.42	16	27	8.2	100	129	4.6	138	35.8	12.8	1.1	25	1.5	4.5	13.3	29	1.2	0.4374	0.1134	4.7952	5.4	0.2	0.7	146	38	144	44	4.9	2.1	28.8	35.6	81	12.9	4.44	46	0
2.8	7.48	13	24	8	111	102	3.2	145	25.3	8.9	0.5	31	2.2	2.8	13.8	26.6	1.2	1.0375	0.4	10.9	12.5	0.2	1.1	429	42	278	43	2.6	0.8	31	35	89	15.2	2.86	49	0
2.8	7.41	14	28	9.5	101	81	4.1	139	41.1	14.6	1.2	20	1.7	2.2	14.3	27.7	1.2	2.2659	0.0455	6.4246	9.1	0.3	3.6	274	30	62	40	4.3	0.7	30.3	35.4	85	14.2	4.82	52	0
2.8	7.36	29	13	9.6	105	264	4.7	142	34.2	11.4	2.8	40	1.8	3	14.3	24.1	1.4	1.15	0.46	8.74	11.5	0	0	278	29	236	39	3.7	0.7	30.7	33.4	92	13.8	3.73	66	1
2.8	7.56	24	22	9.1	94	119	6.8	133	34.2	11	8.4	55	3	4.1	14.7	34	1.3	0.7504	0.1474	5.6414	6.7	0.7	1.7	252	20	627	38	3.4	1.1	32.1	32.3	99	19.3	3.44	50	0
2.8	7.19	24	19	9.9	100	243	6.1	137	47.1	16.4	1.6	26	2.6	6.2	13.6	25.6	1.3	3.575	0.559	8.619	13	0.7	1.2	360	14	136	38	3.2	0.4	31.6	34.8	91	13.1	5.2	67	0
2.8	7.34	16	27	7.7	100	122	3.5	139	31.8	11.4	1.2	12	1.7	2.1	12.5	31.7	1.1	0.5208	0.1092	7.7532	8.4	0	0.2	321	33	63	37	3.1	0.2	32.9	36	91	13.5	3.48	42	0
2.8	7.27	21	19	5.3	99	135	3.9	135	38.4	13.3	2.7	67	1.8	2.1	13.8	42.2	1.2	0.6908	0.0785	14.8836	15.7	0.1	0.2	34	40	300	35	2.5	1.3	28.7	34.6	83	13.8	4.64	57	0
2.8	7.37	18	26	10.2	98	540	4.2	138	45.5	15.5	1	20	2	4.5	13.2	23.2	1.2	1.1562	0.4371	12.2529	14.1	0.5	1.3	139	15	65	33	3.1	0.7	31.4	34.2	92	12.7	4.95	50	0
2.8	7.34	14	25	8.5	109	124	4.5	143	34	10.6	0.8	21	2.1	2.7	12.9	27.9	1.2	0.895	0.145	1.32	2.5	1.3	4.4	235	19	74	31	2.6	0.3	27.5	31.2	88	15.1	3.86	85	0
2.8	7.34	24	20	8.2	95	107	3.8	135	17.4	5.5	12.5	64	2.6	7.9	14.6	32.3	1.3	0.5992	0.2016	4.704	5.6	0.5	1.2	319	13	616	30	3	1.1	28.1	31.7	89	17.5	1.97	50	0
2.8	7.04	20	26	8.5	95	113	4.5	136	27.3	8.2	2.5	65	1.9	2.9	14.9	33.5	1.3	4.875	2.625	29.25	37.5	0	0	315	15	110	28	2.9	0.2	29.6	29.9	99	21	2.76	86	1
2.8	7.34	21	25	7.8	96	111	3.2	139	38.6	13.1	2.7	88	1.4	4.1	11.3	20.7	1	0.7832	0.3649	7.7341	8.9	0.1	0.1	133	15	88	28	2.9	0.5	26.2	34	77	15.6	5.02	61	0
2.8	7.26	14	33	8.8	106	138	5.3	148	40.6	12.1	1.4	40	2.4	3.8	15.6	28.3	1.4	1.0314	0.7258	17.1327	19.1	0.5	0.6	252	17	64	28	2.8	0.5	24.9	29.9	83	16	4.87	64	0
2.8	7.34	17	19	9	108	169	5.3	139	37.3	13.1	2	43	1.9	4.1	20.8	30.4	2	0.484	0.968	21.538	24.2	0	0	162	21	55	28	3.1	0.6	32.4	35	93	13.8	4.03	88	0
2.8	7.47	17	31	8.6	92	168	4.8	135	31.8	10.3	1.7	62	1.8	5.7	12.1	27	1	2.475	1.375	23.375	27.5	1	0	655	26	71	27	2.4	0.4	27.5	32.4	85	19.7	3.75	80	1
2.8	7.35	21	21	7.1	97	90	4.8	134	40.3	13.3	7	35	1.3	5.9	26.5	36.1	4.6	2.272	0	10.224	14.2	0	0	90	17	153	27	3	0.9	32.6	33.1	99	15.8	4.1	69	1
2.8	7.38	17	27	8.2	78	209	3.5	118	33.3	12.1	1.2	47	1.8	4	12.8	23	1.1	1.5552	0.2688	7.6032	9.6	0.5	1.3	178	16	80	25	2.9	0.4	31.7	36.5	87	15.1	3.82	81	0
2.8	7.47	18	25	8.9	101	91	3.2	141	36.1	12	4.2	16	1.4	3.1	25.4	40	2.5	0.192	0.64	5.056	6.4	1	2	137	7	78	25	2.7	0.5	29.5	33.3	88	19.8	4.09	79	0
2.8	7.17	13	29	7.9	108	186	3.8	146	31.9	10.3	2.3	13	1.3	2.3	62.1	150	32	2.59	0.6475	14.3745	18.5	0.6	4.2	165	9	135	23	2.2	0.3	32.1	32.2	100	21.2	3.21	70	0
2.8	7.34	14	26	9.1	100	163	4.3	136	37.5	12.9	1	16	2.3	4.1	12.8	24.4	1.1	2.1218	0.5974	7.0967	10.3	0.6	4.2	457	5	64	22	4.1	0.3	33.1	34.4	96	13.1	3.9	64	0
2.8	7.24	20	22	6.9	92	225	3.9	130	33.3	10.3	9.9	44	2.4	6.3	13.2	27.8	1.1	1.8176	0.352	3.9936	6.4	0.8	2.9	128	11	85	20	2.6	0.2	27.4	30.8	89	19.9	3.75	55	1
2.8	7.38	16	26	9.2	101	121	3.6	139	37.1	12.3	0.8	15	2.1	2.4	29.3	33.7	3	0.7448	0.441	8.5946	9.8	0.1	0.1	196	12	122	18	4	1.3	29.3	33.3	88	14.8	4.21	69	0
2.8	7.31	13	21	7.1	108	83	3.7	138	23.5	7.4	0.9	14	1.7	3.5	19	54	1.8	1.032	0.774	22.704	25.8	1	0	622	11	145	15	1.7	0.4	30	31.6	95	16.4	2.48	76	1
2.7	7.34	13	22	7.2	107	135	3.7	138	34	12.2	1.2	10	1.1	1.9	14.3	28.8	1.2	0	0	5.046	8.7	0	0	153	371	52	582	3.7	1.2	32.5	35.7	91	13.3	3.74	32	0
2.7	7.27	20	14	6.1	106	208	4.4	136	33.1	11.3	4.8	110	1.4	2.6	12.9	30.3	1.1	0.258	0.086	6.02	8.6	0	0	27	108	112	170	2	1.9	31.2	34.1	92	14.9	3.61	78	0
2.7	7.36	19	19	5.9	116	75	3.5	150	42.1	13	2.4	53	1.5	2.7	15.6	33.1	1.4	1.1856	0.2128	28.8496	30.4	0.4	0.2	82	116	246	133	2.4	2	28.3	30.9	92	16.2	4.59	68	0
2.7	7.4	16	24	7.6	101	322	4.6	136	21.1	7.3	1.4	27	1.5	2.5	12.5	20	1.1	1.9775	1.2775	14.1225	17.5	0.3	0.4	477	100	462	126	3.1	3.1	29.1	34.6	84	16.3	2.51	54	1
2.7	7.26	22	22	7.5	93	169	3.4	134	30.4	9.4	9.5	66	2.2	10.6	13.7	28.7	1.2	0.9588	0.2679	3.2524	4.7	0.1	4.6	149	73	149	112	2.9	1.3	25.7	30.8	84	16.6	3.64	54	0
2.7	7.39	19	21	8.8	105	286	4.3	141	31.4	9.6	2	24	2.2	5.5	12.2	34	1	5.8519	0.278	7.2836	13.9	0.3	3.1	579	73	149	112	3.2	1.3	28	30.7	91	16.1	3.45	64	0
2.7	7.42	16	25	7.9	94	87	4.1	131	34.7	11.8	2.7	65	1.8	3.5	22.1	35.3	2.1	0.784	0.14	1.092	2.8	0	0	68	63	90	108	3	1	36.5	34	107	17.1	3.23	87	0
2.7	7.39	16	16	7	111	164	3.4	140	34.1	11.6	3.4	115	2.4	3.9	16	33.7	1.5	0.352	0.528	7.656	8.8	0	0	23	156	107	104	2.5	3	32.3	34	95	15.1	3.59	62	0
2.7	7.35	19	24	7.8	104	217	4.3	143	28.7	10.2	1.3	33	2.2	3.7	42.5	41.7	4.8	0.905	0.362	15.566	18.1	0	0	331	41	65	99	2.6	1.4	33.2	35.6	93	14.7	3.07	78	0
2.7	7.21	15	21	9.8	103	144	7.8	131	48.8	15.5	1	17	1.9	3.7	12.9	22.4	1.1	0.2952	0.0504	6.8184	7.2	0.2	0.3	258	30	179	79	3.4	0.7	33.2	31.8	104	13.5	4.68	73	0
2.7	7.46	14	21	7.4	104	58	4.9	134	22.8	7.3	1	30	1.8	2.6	20	34.8	1.8	0.154	0.154	6.853	7.7	0	1	113	38	179	75	2.2	4.4	32.7	31.8	103	20.4	2.22	73	0
2.7	7.36	24	24	9.7	105	208	6.9	146	44.9	14.7	1.6	56	2.7	3.7	14.8	26	1.3	2.424	2.424	35.148	40.4	0	0	301	25	72	69	2.9	0.6	22.3	32.8	68	15.6	6.62	65	0
2.7	7.33	25	23	8.4	94	128	6.9	135	31.1	10.4	5.5	37	2.2	5	16.9	25.5	1.6	0.672	0.18	0.336	1.2	0	0	298	22	87	59	2.6	0.5	27.9	33.3	84	16.1	3.71	61	1
2.7	7.33	10	26	8	109	123	3.8	141	38.3	13	1.7	25	1.7	3.2	41.3	40.4	4.4	0.705	0.5358	12.7323	14.1	0.2	0.7	128	30	137	57	3.7	0.6	29.7	33.9	88	13.8	4.37	77	0
2.7	7.29	8	25	8	110	105	4.7	138	30.7	9.8	0.7	18	1.8	3.7	11.8	28.7	1.1	1.672	0.6688	11.856	15.2	0.23	0.96	429	48	94	57	2.3	0.3	28.2	32	88	16.7	3.48	54	0
2.7	7.26	16	16	6.5	110	140	4	138	25.4	8.4	2.3	46	1.6	4.7	20.1	42.7	2.9	0.5896	0.5092	25.6744	26.8	0	0.1	149	47	257	53	2	5.6	30.5	33	92	15.7	2.75	45	1
2.7	7.4	16	21	8	99	71	5.8	130	30.1	9.6	1.1	17	2.8	4.4	18.6	34.7	1.8	1.9195	0.1045	3.377	5.5	0.8	1	152	19	107	49	2.9	1.9	36.7	32.1	115	21.2	2.62	79	0
2.7	7.31	16	27	8.4	99	117	4	138	38.7	13.3	0.9	15	1.8	3.3	13.1	29.3	1.1	0.783	0.696	7.047	8.7	0	1	176	32	61	49	3.2	0.5	32.4	34.5	94	13.4	4.11	79	0
2.7	7.39	15	27	9.5	100	118	4.4	138	36.2	11.9	1.4	24	2.3	3.9	20.6	33.8	2	0.616	0.896	3.864	5.6	0	0	128	33	92	47	4	3.6	29.1	32.9	88	16.4	4.09	80	0
2.7	7.28	19	16	8.2	101	135	3.5	132	32.4	10.5	1.7	32	1.5	1.4	13.1	28.4	1.1	0.08	0.08	7.2	8	0	0	148	62	225	45	3.6	0.9	27.4	32.4	85	14.3	3.83	63	0
2.7	7.47	17	20	8.5	108	156	4.1	141	27.5	8.3	0.9	21	1.9	3.5	38.5	43.6	3.9	0.231	0	5.005	7.7	0	2	158	13	43	42	3.3	2.2	21.8	30.3	72	19	3.83	81	0
2.7	7.34	16	29	8.8	102	136	3.7	143	38.1	12.4	1	33	2	2.8	22.1	28.2	2.1	0.8415	0.2907	14.1372	15.3	0.1	0	224	19	87	40	3.6	1	30.4	32.4	94	13.6	4.07	87	0
2.7	7.44	20	22	8.4	100	77	6.5	135	40.8	12.7	9.7	27	1.8	3.5	12.9	35.2	1.2	0.918	0.306	8.772	10.2	0	2	96	14	168	38	2.9	0.3	30.2	31.2	97	17.4	4.22	64	0
2.7	7.39	12	33	8.7	99	256	3.3	141	38.2	12.4	1.3	52	1.9	3.8	60.3	55.3	7.2	0.798	0.42	19.719	21	0.2	0.1	248	40	121	37	3.6	0.5	30.3	32.4	94	14.2	4.08	64	0
2.7	7.24	13	24	7.8	95	133	5.6	126	28.8	9.4	1.2	91	1.7	2.6	12.9	51.2	1	0.783	1.044	20.097	26.1	0	0	299	46	170	34	2	0.2	29	32.6	89	15.4	3.24	83	0
2.7	7.48	13	32	9.1	97	166	4	138	43.6	14.7	1.1	25	1.9	1.7	31.4	31.7	3	2.408	0.7568	13.9664	17.2	0.3	0.1	175	15	56	34	3.7	1.1	30.1	33.7	89	13.5	4.88	69	0
2.7	7.34	25	22	10.1	98	74	3.8	141	41.7	14.4	6.8	23	1.4	4.9	18.4	150	2.4	0.556	0.695	12.093	13.9	0	0	240	28	173	34	3.6	0.7	31.1	34.4	90	15.5	4.62	48	0
2.7	7.32	22	19	7.8	100	47	4	137	21.7	7	6.6	64	2	5	14.3	28.4	1.2	1.9468	0.2418	3.8254	6.2	1.1	1.9	192	14	87	34	2.8	0.2	28.8	32.5	89	17.6	2.45	54	0
2.7	7.34	12	33	9.2	99	135	4.8	139	36.3	12.6	1.3	14	1.7	2.4	14.1	25.6	1.2	0.414	0.408	5.106	6	0.3	0.8	147	23	279	32	3.5	0.4	39.5	34.7	114	17.6	3.18	54	0
2.7	7.4	19	25	8.7	96	119	4.2	136	43.4	13.9	1.3	85	2.3	2.3	20.3	28.3	1.9	0	0.552	8.464	9.2	0	0	108	23	185	31	2.6	0.6	29.6	32.2	92	17.4	4.71	80	0
2.7	7.34	18	18	8.3	105	117	3.5	137	29.8	9.4	1.6	53	2.1	4.6	52.2	54.9	6.2	0.414	1.242	15.732	20.7	0	1	157	17	354	31	2.9	1.8	29.9	31.5	95	18.8	3.14	64	1
2.7	7.34	18	23	9.6	108	320	3.7	145	44.8	15.1	1	18	2	2.5	12.3	31.1	1.1	1.1926	0.3382	15.931	17.8	0.1	1.9	247	17	105	30	4.1	0.5	30.9	33.6	92	14.2	4.88	64	0
2.7	7.44	17	24	8.3	99	116	6.3	134	31.4	10.3	1.8	128	1.9	3.2	12.8	24	1.1	0.798	0.798	20.748	26.6	0	0	125	25	148	29	2.9	0.3	29.9	32.9	91	17.7	3.46	83	0
2.7	7.41	15	23	9.2	101	204	3.6	135	40.3	14	1	16	1.8	1.5	13.4	32.7	1.2	0.4536	0.3864	15.876	16.8	0.2	0.3	242	26	45	29	2.9	0.9	30.5	34.7	88	12.5	4.58	51	0
2.7	7.37	19	22	8.8	89	310	4.6	125	30.5	9.8	5.3	25	1.7	4.5	18.9	42	1.7	0.7719	0.498	6.8807	8.3	0.3	1.5	81	15	210	27	3.3	3.9	29.6	32.3	92	21.4	3.32	57	0
2.7	7.34	16	17	7.4	108	214	4.9	136	31.9	11	1.8	37	1.8	3.5	15.2	31.5	1.3	1.43	0.462	8.921	11	0.3	1.5	118	32	84	27	3.1	0.5	28.5	34.5	83	15.2	3.87	59	0
2.7	7.41	11	26	8.7	112	81	4.1	145	33.7	10.4	1.7	58	2.7	4.6	15.8	29.1	1.4	0.715	1.1	25.6025	27.5	0.2	0.1	428	18	50	27	2.9	0.5	24.9	30.9	80	16.1	4.2	64	0
2.7	7.35	10	26	7.4	101	181	3.1	134	34.1	11.3	1.4	11	1.5	2.6	14.9	33.9	1.3	1.4194	0.8758	12.4726	15.1	0.3	1.9	180	26	90	22	2.9	1.1	26.9	33.3	81	15.8	4.22	62	0
2.7	7.36	16	23	8.8	94	123	4	129	30.2	10.5	1.2	26	1.8	2.6	13.1	31.2	1.1	2.268	0	0.081	2.7	0	0	12	13	43	20	3.3	0.8	31.2	34.9	89	15	3.38	79	0
2.7	7.45	17	31	8.9	94	142	3.9	138	31.6	9.4	3.1	21	2	2.9	15	28.6	1.3	0.6987	0.2603	12.5903	13.7	0.2	1	324	17	237	20	3.3	0.6	30.5	29.9	102	21.5	3.09	63	0
2.7	7.19	19	18	7.6	96	105	4.6	128	28.7	9.8	3.7	42	2.4	4.6	14.4	32.8	1.2	1.5996	0.7095	10.2942	12.9	0.7	1.7	936	18	125	19	2.5	0.2	31.5	34	93	12.6	3.1	52	0
2.7	7.47	12	39	8.6	97	135	3.8	144	38	12.1	2.3	54	3.2	3.1	25.4	34.9	2.5	0.13	0.91	10.79	13	2	0	331	11	94	19	3.7	1.1	27.5	31.9	86	14.9	4.41	80	1
2.7	7.33	16	24	8.6	114	161	4.3	150	28.8	9.8	0.8	51	2.5	3.2	15	26.7	1.3	1.2771	0.645	10.9134	12.9	0.4	0.1	447	22	99	19	2.7	0.3	30.8	34.1	90	18.3	3.19	74	0
2.7	7.34	20	22	8.9	103	167	5.3	140	31	9.6	1.9	51	2.1	4.4	13.3	25.8	1.2	2.112	0.576	15.552	19.2	0	5	634	10	101	17	3.6	0.2	31.9	30.9	103	18.6	3.01	67	0
2.7	7.31	18	27	7.9	98	86	2.8	140	39	12.7	11.6	37	1.2	4.3	13.6	26.5	1.2	0.384	0.096	1.68	2.4	0	1	404	10	116	14	3.6	1.3	32.2	32.4	99	16.9	3.93	59	0
2.7	7.24	16	23	8.7	103	145	5.5	136	32.4	9.6	2.5	48	2.1	5.4	14.7	27.8	1.4	0	1.835	31.929	36.7	0	0	586	7	218	14	2.9	0.8	25.2	29.7	85	14.6	3.82	64	1
2.7	7.34	24	21	7.9	93	109	7.1	131	35.9	11.5	9.6	31	1.5	5.2	16.6	33.4	1.5	0.61	0.366	10.858	12.2	0	0	184	4	101	12	2.6	0.4	29.7	31.9	93	18.4	3.86	56	0
2.7	7.25	15	29	9	102	196	5.4	141	32.4	11.2	3.4	48	1.4	3.6	13.7	25.4	1.2	0.398	0.199	18.308	19.9	0	0	159	6	98	11	3.8	0.4	30.6	34.5	89	14.7	3.64	74	0
2.6	7.34	17	20	7.6	102	179	4.3	135	38.4	12.9	1	13	1.4	3	17.6	35.4	1.6	2.059	0.284	11.7008	14.2	0.3	0.8	144	343	222	389	3.4	2.9	32.5	33.6	97	17.2	3.98	42	0
2.6	7.34	20	20	8.1	100	378	4.5	135	31.9	9.2	2.7	68	2	4.6	16.2	31.1	1.5	1.4456	0.7367	11.6343	13.9	0.2	0.4	348	257	408	313	2.4	0.4	24.4	28.8	85	16.3	3.75	76	1
2.6	7.34	18	20	10	98	202	4.7	131	47.4	15.2	2.7	36	2.2	4	12	24.8	1	1.35	0.594	2.5065	4.5	0.6	0.6	259	180	180	209	3.6	0.7	30.5	32.2	95	13.5	5	58	0
2.6	7.34	11	29	6.9	105	82	4.4	141	16.1	5.1	2.5	14	1.4	2.7	19	34.6	1.7	0.871	0.1508	1.508	2.6	0.3	2.4	162	114	195	196	2.1	1	29	31.6	92	18.4	1.76	59	0
2.6	7.44	15	21	8.9	112	144	4.6	136	36.1	12.4	0.5	9	2	2.1	21.5	65.4	3	0.814	0.3256	5.772	7.4	0.23	0.96	40	23	62	167	2.7	5.2	31.4	34.4	91	14.7	3.95	76	0
2.6	7.35	15	30	7.6	95	180	4.3	136	31.7	10.3	1.5	62	2.6	1.4	12.6	26	1.1	1.0112	0.7426	13.9988	15.8	0.1	0.2	372	27	83	139	2.9	0.2	31.4	32.4	97	14.3	3.26	64	1
2.6	7.43	9	24	7.7	109	97	3.3	139	23.5	7.9	3.2	61	2.2	3.8	17	40.2	1.5	1.05	0.42	16.17	21	0	3	58	33	46	128	1.4	2	31.4	33.7	93	19.2	2.52	60	0
2.6	7.42	17	29	9.5	100	161	4.7	141	34	11	1.7	37	2.8	3	10.6	18.9	0.9	2.1538	0.4272	15.041	17.8	0.5	0.5	416	73	149	112	3.8	1.3	29.9	32.4	92	16.7	3.69	69	0
2.6	7.22	19	25	8.6	101	109	4.4	141	30.7	10	1.7	36	1.7	4.1	15	36.6	1.5	1.377	0	7.191	15.3	0	0	348	73	149	112	2.2	0.3	31.2	32.5	96	13.4	3.19	80	0
2.6	7.25	19	25	8.4	109	144	3.9	149	37.9	12.7	3.6	93	2.4	4	52.9	57.6	6.1	0.275	0.33	4.345	5.5	0	0	192	46	41	105	1.9	0.2	30.4	33.6	91	14.1	4.19	67	1
2.6	7.41	16	23	7.8	82	87	4.2	117	34.5	11.9	1.7	27	1.3	3.4	15.2	30.1	1.3	0.294	0.294	11.613	14.7	0	1	171	61	148	91	2	4.7	26.6	34.6	77	14.4	4.49	36	0
2.6	7.14	21	19	8.7	106	329	4.8	141	41.1	13.1	1.2	34	1.8	4.2	13.9	29.7	1.4	3.7125	0.4375	8.0625	12.5	0.5	1.9	291	130	127	86	2.9	0.5	28.8	31.9	90	13.7	4.55	64	0
2.6	7.37	26	18	8.1	76	680	4.1	116	35.6	11.7	2.8	67	2.4	3.1	12.1	22.4	1	0.972	1.296	12.96	16.2	0	0	280	32	105	82	2.2	0.4	25.3	32.7	77	14.2	4.61	57	0
2.6	7.48	7	19	7.6	100	127	4.3	122	24.9	8.6	0.6	9	1.8	2.9	19.9	39	1.9	0.8151	0.4212	2.5857	3.9	0.1	2	42	53	179	82	2.4	1.7	32.7	34.6	94	17.8	2.64	50	0
2.6	7.38	20	23	8.3	102	83	4.6	140	38.6	12.3	4.8	38	1.9	4.5	13.7	28.3	1.2	0.7616	0.2576	10.0352	11.2	0.6	0.6	214	32	60	78	3.5	0.6	25.8	31.8	81	22.8	4.76	67	0
2.6	7.32	19	23	8	94	153	5.3	131	31	10.6	1.8	35	2.2	6.5	12.6	33.5	1.2	0.4602	0.3422	10.974	11.8	0.1	0.2	276	38	113	74	3.6	0.9	27.7	34.1	81	14.1	3.83	79	0
2.6	7.32	14	18	7	117	114	4.2	145	38.1	12.8	1	20	1.5	2.6	16.7	43.8	1.9	2.9	0.725	9.57	14.5	0	1	212	53	316	74	2.5	1.9	30.1	33.6	90	13.8	4.25	57	0
2.6	7.51	14	29	8.7	102	116	3.6	141	31.3	10.4	3.7	35	2.2	4.6	20.3	150	1.9	1.1651	0.8786	16.5597	19.1	0.3	2.2	87	39	116	70	3.1	5.7	37.2	33.3	112	20.3	2.8	47	0
2.6	7.34	16	20	8.1	90	138	3.9	122	25.5	9.2	1.9	63	1.7	2.7	15.3	33.3	1.4	0.068	0.408	6.12	6.8	0	0	76	57	329	65	3.1	1.1	30.8	36	86	18	2.98	69	0
2.6	7.56	11	34	7.9	98	228	3.3	140	39.3	12.6	0.9	31	1.9	1	13.6	31.3	1.2	4.8924	1.3932	25.8552	32.4	0.7	0.1	257	19	633	55	2	0.2	29.5	32.1	92	15.4	4.28	72	0
2.6	7.34	18	19	8.3	104	126	4.8	136	33.4	10.8	1.1	17	1.5	1.7	13.1	22.2	1.2	0.243	0.0405	4.194	4.5	0	0.3	165	67	85	51	3.4	0.7	25.1	32.3	78	16.1	4.29	64	0
2.6	7.37	18	34	7.8	97	125	4.6	144	38.6	12.4	2.1	19	1.4	2.8	13.8	107	1.2	1.7253	0.5538	18.8079	21.3	0.1	0.8	476	8	163	50	3.1	0.6	36.1	32.1	113	19.7	3.43	81	0
2.6	7.34	15	25	8.4	103	125	3.6	139	35	11.4	0.8	8	2.2	2.5	16.1	39.9	1.4	1.8675	0.5893	5.7187	8.3	0.4	1.1	162	9	253	47	3	1	32.4	32.6	99	16.6	3.52	67	0
2.6	7.39	22	20	9.4	100	90	4.3	138	31.2	10.4	2.4	46	2	3.4	15	38.9	1.5	1.896	1.896	24.648	31.6	0	0	223	19	72	45	3.4	0.8	28.2	33.5	84	13.6	3.69	64	1
2.6	7.29	20	19	8.9	103	158	4.7	137	39	12.3	2.9	28	1.5	3.3	14.6	44.1	1.5	2.184	1.092	31.668	36.4	0	0	521	16	256	42	2.1	0.4	27.3	31.6	86	18	4.52	73	1
2.6	7.34	25	15	8.5	92	124	4.4	128	44.2	14.3	4.3	67	1.7	4.3	15.1	52.8	1.3	1.2064	0.2436	10.0572	11.6	0.3	0.5	419	18	95	37	2.7	1.2	30.5	32.3	94	16.2	4.68	68	0
2.6	7.27	15	23	8.1	100	138	3.3	135	40.4	12.7	2.7	18	1.6	2.7	23.5	40.1	3.7	0.7688	0.2852	4.991	6.2	0.3	2.2	284	65	506	36	3.5	0.4	29.9	31.5	95	16.3	4.25	64	0
2.6	7.29	15	27	8.7	102	147	4.2	140	33.6	10.6	2.8	37	2	1.5	25.5	44.3	4.3	1.9012	0.8924	16.102	19.4	0.4	2.2	321	7	745	31	2.5	0.6	30.8	31.7	97	19.8	3.45	53	0
2.6	7.43	17	22	7.4	91	88	4.3	126	35.4	11.9	1.5	45	1.9	3.2	19.2	36.7	1.7	0.747	0.332	6.225	8.3	0	0	151	16	151	29	3.5	1.9	33.9	33.6	101	18.2	3.51	64	0
2.6	7.27	19	18	6.2	130	327	5.7	161	31.8	10	3.6	101	2.3	3.7	18.5	38.5	1.7	1.9425	0.222	16.243	18.5	0.3	0.1	217	18	88	28	2.1	0.4	25.5	31.4	81	17.1	3.92	64	1
2.6	7.41	16	24	9.2	101	177	4.2	137	30.1	10.9	0.8	20	1.7	2.7	13.7	33	1.2	0.5037	0.1587	6.21	6.9	0.1	0.3	170	22	136	27	3.7	1.6	28.7	36.1	79	13	3.8	45	0
2.6	7.44	13	27	7.5	105	95	4.5	140	35.1	12.1	0.9	21	1.4	3	14.5	26.4	1.3	0.5576	0.0748	6.1132	6.8	0.1	0.6	103	48	57	27	2.9	0.8	31.2	34.6	90	13.7	3.89	79	0
2.6	7.16	12	24	9.2	106	84	3.8	138	38.8	11.7	1.7	37	1.9	1.5	26.7	33.6	2.7	0.745	0.596	10.877	14.9	0	0	273	14	74	26	3.1	1	24.1	30	80	19.5	4.83	74	1
2.6	7.37	14	24	8.1	103	92	4.1	137	35.3	11.5	0.8	18	1.2	1.4	14.1	22.2	1.3	0.7389	0.0821	6.4859	8.21	0	4	376	34	72	25	3.7	0.2	29.2	32.6	90	14.4	3.94	35	0
2.6	7.37	17	30	9.2	105	144	4.5	147	44.6	14.8	0.6	18	1.9	3.5	12.1	27.4	1	3.8009	0.7562	15.2832	19.9	0.3	0.1	252	11	72	25	2.9	1.4	30.7	33.2	92	14	4.82	88	1
2.6	7.26	12	24	8.4	106	251	3.8	138	34.7	11.7	2	28	1.5	1.4	17.9	75.2	2	0.714	2.142	17.85	23.8	0	0	297	29	105	25	3.5	0.4	29.9	33.8	88	14.1	3.93	65	0
2.6	7.27	15	19	8	109	108	3.9	139	32	11.3	2.2	49	1.8	3.5	13.9	32	1.2	0.372	0.124	9.92	12.4	0	0	318	18	52	25	2.2	0.5	30.7	35.5	87	13.5	3.7	87	1
2.6	7.41	15	22	9.2	104	148	4.4	137	39.8	13.7	1.3	27	1.6	2.6	20.3	27.9	2.6	0.5656	0.0909	9.3829	10.1	0.1	0.5	99	29	54	24	4.4	1.4	30.3	34.4	88	14.8	4.51	77	0
2.6	7.3	12	35	9.9	106	124	4.5	148	39.8	13.1	0.8	20	1.8	4.4	12.7	36.3	1.1	0.763	0.218	7.412	10.9	0	0	238	9	149	24	2.3	1.3	29.1	32.9	88	13.6	4.51	85	0
2.6	7.3	23	17	7	135	130	4.2	171	41.7	12.2	3	212	3.5	7.1	18.4	25.1	1.7	0.167	0.668	15.865	16.7	0	0	345	24	54	24	2.1	0.6	26.4	29.2	91	17.3	4.61	78	0
2.6	7.11	15	21	8.3	110	164	4.9	141	27.7	9	4.2	69	2.3	5.3	15.3	34.8	1.4	1.05	0.07	1.925	3.5	0	0	249	10	61	22	2.9	0.6	28	32.3	87	13.8	3.19	88	1
2.6	7.38	18	29	6.3	94	184	4	137	34.8	11.4	2.7	58	1.8	3.8	14.8	31.5	1.5	2.1924	0.348	6.0291	8.7	0.6	1	400	9	118	21	2.4	0.3	29.5	32.7	90	14.1	3.86	85	1
2.6	7.46	18	21	8.2	103	255	5.5	136	22.2	7.3	1	29	1.9	3.4	13.2	23.5	1.1	3.9039	0.1547	4.9504	9.1	0.5	0.5	380	12	202	21	2.2	0.1	34.5	33.1	104	14.1	2.12	64	0
2.6	7.34	19	25	8.5	104	116	4.8	143	26.4	8.7	5	40	1.9	4.2	17.5	31.5	1.6	0.5768	0.4017	9.2082	10.3	0.2	0.8	275	14	137	20	2.8	0.3	32.6	32.8	99	17.2	2.66	37	0
2.6	7.13	21	24	6.2	107	185	6.9	145	20.3	6.3	2.3	111	1.6	5.2	12.7	28.8	1.1	0.396	0.198	17.226	19.8	0	0	362	17	122	20	2.1	0.3	29.4	30.8	95	15.8	2.13	71	0
2.6	7.5	16	23	7.5	109	148	3.9	144	24.1	7.7	1.9	109	2.5	3.8	14.6	30.8	1.3	0.168	0.392	4.872	5.6	0	0	15	11	66	19	2.1	3.4	27.5	32.2	86	18.4	2.81	62	1
2.6	7.37	11	17	4.6	118	147	3.1	143	25	7.9	0.7	15	0.9	3	16.6	38.9	1.5	0.144	0	0.288	0.6	0	0	101	19	48	19	1.6	0.5	27.1	31.8	85	18.3	2.93	28	0
2.6	7.34	18	24	8.8	98	93	4.1	136	46	16	1	21	2	3.4	12.9	38.3	1.1	2.112	0.528	13.072	16	0.5	1.3	223	15	83	17	4.2	0.7	30.8	34.9	88	13.1	5.2	78	0
2.6	7.34	24	15	8.6	95	213	8.3	126	25.1	8.1	9.4	84	2.3	5.8	12.5	32.3	1.2	1.8336	0.6303	16.2732	19.1	0.3	1.6	599	9	168	14	3.1	0	30.7	32.1	96	13.7	2.62	42	0
2.6	7.34	21	23	7.7	95	134	5.5	133	31.9	10.7	1.3	34	1.5	2.8	13.4	31.6	1.2	1.232	0.384	14.192	16	0.6	0.5	378	11	70	14	3.4	0.2	28.4	33.5	85	15.5	3.75	60	0
2.6	7.51	14	31	8.4	95	300	4.2	136	34.9	11.3	2.3	22	1.8	2.4	20.1	33.5	1.9	1.0507	0.8512	11.2518	13.3	0.3	0.8	333	11	82	12	2.2	0.3	31.1	32.4	96	19.8	3.64	76	0
2.6	7.47	17	24	8	100	167	5.2	136	37.7	11.9	0.8	24	1.5	4.5	11.8	24.6	1	2.772	0.72	32.22	36	0.7	0.1	729	5	58	7	2.1	0.8	27.1	31.6	86	18.6	4.4	80	1
2.5	7.28	16	18	6.7	110	142	4.2	140	32.3	11	3.9	51	2.3	3.9	13.9	26.4	1.2	0.582	0.388	16.878	19.4	0	0	74	364	78	495	2.8	9.5	29.5	33.9	87	15.1	3.72	54	0
2.5	7.47	25	24	8.8	93	115	9.6	132	32.4	10.1	8.1	48	2.2	4.7	22.4	42.9	3.2	0.3828	0.1479	8.1171	8.7	0.1	0.5	263	35	200	148	2.8	1	27.3	31.1	88	17.8	3.7	59	0
2.5	7.47	12	30	7.3	105	201	3.8	143	28.8	10.5	3.2	38	2.2	3.2	11.7	29.4	0.9	0.6348	0.1656	8.3076	9.2	0.3	0.7	21	370	131	117	2.3	1.5	29.4	36.3	81	14	3.56	44	0
2.5	7.44	17	22	8.1	108	105	3.2	144	35	12.1	0.5	6	1.7	2.1	12.8	31	1.1	1.79	0.358	13.067	17.9	1	9	185	129	137	116	2.5	1.8	29	34.6	84	15.4	4.17	21	0
2.5	7.19	23	17	8.5	95	97	7.5	127	31	10.9	5.3	79	2.5	6.3	15.1	27.4	1.4	0.6237	0.4697	6.5219	7.7	0.3	0.8	189	73	149	112	2.9	1.3	33.3	35.1	95	15.6	3.28	48	1
2.5	7.23	16	29	8.7	100	96	7	138	34.9	11.3	3.5	30	1.9	3.5	13.5	26.7	1.2	1.9856	3.0192	8.3912	13.6	0.2	1.2	115	73	149	112	2.9	1.3	36.1	32.5	111	20.4	3.14	71	0
2.5	7.37	17	26	8.1	105	307	4.7	143	40.9	14.7	1.5	24	1.9	2.6	12.2	24	1	1.0746	0.5771	18.109	19.9	0.3	0.4	309	73	149	112	2.9	1.3	33.1	36	92	14.1	4.45	73	1
2.5	7.32	14	24	7.2	99	131	4.2	133	39.5	13.7	0.8	15	1.8	3.5	13	25.1	1.1	0.5876	0.2373	10.3847	11.3	0.6	0.2	231	59	46	94	3.5	0.6	29	34.5	84	14.8	4.7	77	0
2.5	7.4	16	22	7.5	104	100	4.3	138	45.9	15.5	1.5	21	1.3	0.2	14.7	32.3	1.4	0.464	0.048	1.04	1.6	0	0	155	52	71	72	4.7	1.2	31.4	33.9	93	13.2	4.95	63	0
2.5	7.61	13	22	8.5	90	141	3.9	121	28.1	9.5	0.6	17	1.4	2.9	19.8	36.4	1.8	1.2875	0.85	10.0375	12.5	0.9	1.6	124	42	156	70	3.3	6.8	34.4	34	101	20.4	2.77	66	0
2.5	7.37	21	32	7.6	92	127	4.8	140	32.5	11.2	8.8	32	1.2	4.4	15.5	28.7	1.4	0.103	0.103	9.682	10.3	0	0	240	87	213	66	3.9	3.7	30.9	34.4	90	14.7	3.63	43	0
2.5	7.33	14	27	7.2	104	161	5.4	140	40.6	12.1	1	9	1.1	3.4	16.3	36.8	1.9	2.134	0.194	6.887	9.7	0	0	203	53	281	61	2.1	0.8	26.8	29.8	90	21.6	4.52	53	0
2.5	7.42	18	26	9.5	97	206	6.1	135	43.2	14.6	0.8	14	2	3.9	13.3	27.1	1.2	0.5408	0.7605	15.548	16.9	0.1	0.1	197	19	147	54	3.9	0.5	31.2	33.8	93	14	4.67	88	0
2.5	7.47	14	29	8.1	98	205	3.3	138	36.7	12.2	2.7	45	1.8	4.5	13.1	25.1	1.2	0.717	0.956	20.315	23.9	0	0	337	27	137	53	2.7	0.2	31.6	33.2	95	17.5	3.86	64	1
2.5	7.32	23	22	9.9	99	85	5.2	139	31.6	10.2	5.3	160	2.5	6.2	49.2	71.5	16	1.0541	0.5461	10.9601	12.7	0.4	0.6	413	40	401	48	2.8	1.5	25.6	32.4	79	16.4	4	59	1
2.5	7.31	16	17	7.7	110	120	5.2	138	33.5	11.5	2.5	56	1.1	6.5	13.3	29.2	1.2	0.968	0.3872	6.864	8.8	0.23	0.96	307	7	60	46	2.1	0.1	30.4	34.4	88	12.3	3.8	72	0
2.5	7.44	18	34	9.1	98	137	4.8	145	35.5	11.7	1.7	50	1.8	5	15.8	66.6	1.5	0.7296	0.2592	8.544	9.6	0.3	0.4	273	17	90	44	2.8	0.7	29.7	32.9	90	13.7	3.93	77	0
2.5	7.19	21	26	10.4	103	558	5.3	145	49.1	15.8	2	71	3.1	4.1	12.4	21.8	1.1	0.8704	0.4224	11.4176	12.8	0.6	0.2	346	44	87	42	2.9	0.2	31.2	32.2	97	13.9	5.07	85	0
2.5	7.41	16	30	6.6	100	156	3.9	142	32.4	10.8	1.3	34	1.1	3	13.4	24.4	1.2	3.03	0.808	9.09	20.2	1	0	225	15	117	39	1.8	0.2	30	33.5	90	18.1	3.62	66	0
2.5	7.3	16	23	7.5	107	104	4.3	142	32.3	11.3	1.2	19	1.6	2.1	13.2	29.5	1.2	1.224	0.3456	12.672	14.4	0.3	0.8	394	24	88	39	2.5	0.3	31.2	34.8	90	12.7	3.6	82	0
2.5	7.34	13	17	8	100	407	5.4	125	38	12.3	1.3	55	1.7	2.6	18.1	38.4	1.6	1.4625	0.3625	10.6375	12.5	0.2	0.1	92	50	140	37	1.5	4.4	33.5	32.2	104	20.3	3.65	68	0
2.5	7.37	15	16	8.8	109	63	3.5	136	27.2	9.2	1.2	37	1.5	4	24.6	64.9	2.3	1.173	0.136	0.238	1.7	1	1	48	43	135	37	2.9	23	29.5	34	87	21.7	3.13	67	0
2.5	7.33	17	19	8.3	104	212	4.9	135	27.7	9	1.6	28	1.6	2.9	16.8	28.6	1.5	0.708	0.6195	16.3725	17.7	0	0	169	38	38	36	3.8	0.8	26.5	32.5	81	14.3	3.41	71	0
2.5	7.3	18	13	6.1	113	94	2.8	141	30.1	9.9	2.4	32	1	3.5	27.3	43.7	2.6	0.14	0.014	0.924	1.4	0	0	27	23	20	35	2.6	1.4	31.2	33	94	13.3	3.19	41	0
2.5	7.43	15	18	8.5	111	224	7.8	136	31.5	9.9	1.1	32	1.7	3.5	13.8	27.3	1.2	0.975	0.405	12.87	15	0.6	4.5	484	15	136	32	2.9	0.5	32.6	31.3	104	13.5	3.03	66	0
2.5	7.5	16	33	8.2	100	83	4.4	145	28.2	8.3	4.3	37	1.8	3.7	33.1	33.7	3.5	1.8142	0.6298	6.815	9.4	0.5	1	314	32	389	31	3.3	1.7	21.5	29.4	73	18.6	3.85	72	1
2.5	7.42	17	30	8.3	95	111	4.1	138	28.5	9.6	4.1	37	1.5	3.8	15.8	27	1.4	0.4752	0.2268	10.0548	10.8	0.1	0.2	172	23	139	30	2.9	0.7	30.5	33.5	91	18.6	3.13	82	0
2.5	7.28	14	26	10.7	105	128	4.7	140	38.6	12.9	1.5	38	1.9	1.8	12.7	22.7	1.1	0.644	0.161	11.27	16.1	1	1	529	15	102	30	3.4	0.4	32.5	33.3	98	14.1	3.96	66	0
2.5	7.16	24	12	8	113	198	4.5	144	36	11.3	4.7	77	1.9	7.6	31.4	36.4	6.2	1.6065	0.651	8.1795	10.5	0.1	0.5	212	26	59	30	3.5	0.3	31	31.5	98	16.9	3.66	73	0
2.5	7.34	17	26	8.1	101	109	4.7	139	34.2	10.9	1.4	28	2	3	12.7	24.8	1.1	1.0224	0.639	19.5534	21.3	0.2	0.2	335	46	57	28	3.3	0.2	28.3	31.8	89	13.9	3.85	87	0
2.5	7.34	21	26	7.1	89	146	3.9	132	29.8	9.7	5.7	95	1.7	5.8	14.7	41.7	1.5	2.208	0.276	10.626	13.8	0	0	193	33	180	27	2.5	0.6	29.4	32.6	90	17.4	3.3	72	0
2.5	7.29	24	13	8.3	103	537	6.2	134	30.8	9.6	5.5	95	2.6	8	14	30.2	1.4	0.8436	0.2368	13.6012	14.8	0.2	0.6	387	36	183	27	2.9	0.2	29.5	31.1	95	16.9	3.25	43	0
2.5	7.34	14	27	7.6	104	109	3.9	141	36.3	12	0.6	8	1.8	2.7	29.2	37.8	3.1	1.183	0.4914	7.2982	9.1	0.2	1.3	427	17	138	22	2.6	0.2	26.5	33	80	17.6	4.53	67	0
2.5	7.39	16	17	7.1	130	170	3.7	159	29.4	9.6	2.3	71	2.4	2.1	14.2	38.1	1.3	2.97	0.704	18.282	22	0.1	0	279	13	53	21	2.6	0.4	29.4	32.6	90	15.6	3.27	74	0
2.5	7.34	14	23	7.5	94	303	3.6	127	36.7	12.1	0.8	17	1.4	0.7	16.1	29	1.4	1.0268	0.2584	5.474	6.8	0.1	0.4	60	14	47	20	2.3	1	31.7	33	96	16.6	3.84	68	0
2.5	7.29	22	25	8.8	96	99	5.8	137	30.6	8.9	6	49	2	5.7	42.1	48.6	4.1	0.351	0	10.062	11.7	0	0	151	10	74	20	3.4	0.1	27.6	29.2	95	16.2	3.24	66	0
2.5	7.49	18	29	9.4	97	178	4.3	140	33.6	10.3	5.7	28	1.6	2.6	24.9	38.7	2.4	0.9282	0.459	8.7006	10.2	0.3	0.6	219	16	118	20	2.9	0.8	30.7	30.7	100	16.2	3.36	62	0
2.5	7.29	19	20	8.7	101	194	3.3	137	40.5	14	1.4	20	1.8	2.1	14.1	28.5	1.2	1.3824	0.3312	5.3784	7.2	1	0.4	124	17	65	20	2.9	0.7	28.7	34.6	83	13.4	4.88	47	0
2.5	7.44	17	22	8.8	99	124	4.6	133	30.7	9.7	1.7	37	2.3	3.6	25.1	41.7	2.5	1.152	1.024	10.368	12.8	0	1	357	11	89	19	3.5	0.6	26.3	31.6	83	17.7	3.69	87	1
2.5	7.22	13	32	8.5	100	263	5.3	140	28.6	8.7	0.6	45	1.6	4.4	12.6	23.9	1.1	0.226	0.565	8.927	11.3	0	0	502	11	82	18	2.3	0.2	27	30.3	89	15.7	3.21	86	1
2.5	7.41	17	22	8.2	99	92	4.2	134	31.9	10.5	2.9	40	1.5	4.6	13.8	29.5	1.3	2.0592	0.4264	7.5088	10.4	0.3	3.7	248	8	96	17	2.9	0.4	31.7	33.1	96	13.8	3.32	80	0
2.5	7.45	15	27	9.1	100	173	4.7	137	30	10.5	1.5	43	3.1	1.5	12.6	25.4	1.1	0.5115	0.4455	15.4935	16.5	0.1	0.1	417	17	89	17	2.9	0.2	31.7	34.9	91	13.8	3.3	77	0
2.5	7.32	22	17	10.7	119	359	5.1	153	33.8	11.5	1.8	106	3.2	2	14.4	31.6	1.3	2.013	0.66	13.695	16.5	0.4	0.5	315	23	82	16	2.3	0.3	32.7	34	96	16.3	3.51	65	0
2.5	7.33	12	29	7.4	106	156	3.3	144	25.9	8.1	2.5	13	1.1	2.6	14.9	37.7	1.5	0.456	0.304	12.616	15.2	0	0	129	8	98	14	2.2	0.4	32.5	31.2	104	17.2	2.48	72	0
2.5	7.52	21	29	9.6	89	101	5.1	134	31.9	10.6	2.7	60	2.6	3.6	29.3	43.8	3.1	1.449	0.966	12.075	16.1	0	1	304	11	52	12	3.3	0.5	28.5	33.2	86	17.3	3.73	87	0
2.49	7.21	27	20	8.6	89	140	7.7	128	39.7	13.4	4.2	100	2.2	4.9	13.2	31.7	1.1	3.443	1.565	12.833	31.3	0	0	527	14	118	16	2.5	0.4	29.3	33.7	87	13.7	4.57	73	1
2.4	7.47	14	24	6.4	112	80	2.9	147	25.7	8.8	1.5	35	1.5	3.1	13.5	26.3	1.2	1.0362	0.2512	14.3498	15.7	0	0.2	43	1225	97	715	2.3	1	29.2	34.4	85	15.1	3.03	73	0
2.4	7.23	27	18	10.3	97	613	5.5	136	46.5	15.2	1.4	30	1.3	4.5	11.8	23.2	1	0.48	0.12	11.4	12	0	0	340	181	74	691	3.7	0.5	31.3	32.7	96	14.3	4.86	66	0
2.4	7.47	14	30	7.9	90	220	4.6	129	30.5	10.9	0.8	24	1.8	3.4	13.7	29.3	1.2	0.5845	0.259	2.5935	3.5	0.3	1.5	43	125	120	352	3	2	28.9	35.9	81	17.5	3.79	69	0
2.4	7.46	17	31	9.4	98	84	5.9	140	25.6	7.9	3.3	32	1.8	3.3	13.4	37.6	1.2	2.112	0.66	23.4168	26.4	0.3	0.5	131	98	151	160	3.4	0.3	36.5	31.1	117	22	2.18	87	0
2.4	7.39	17	23	7.1	112	254	6.6	145	39.9	12.5	1.6	67	2.3	2.4	18.7	33.9	1.7	0.6171	0.6413	10.8174	12.1	0.2	0	268	48	79	156	3.1	0.7	29.4	31.3	94	19.1	4.25	64	1
2.4	7.34	19	21	8.4	96	133	6.5	129	30	10.6	1.6	23	2.4	3.5	41.4	73.9	4.7	1.595	1.16	11.6	14.5	0	0	176	24	142	134	3.2	2.3	28	35.2	80	19.4	3.77	61	0
2.4	7.43	32	17	9.7	94	330	6.8	136	48.5	15	9.8	65	2.1	5.2	12.9	28.7	1.1	0.327	0.327	10.246	10.9	0	0	222	34	235	120	4.5	0.6	30.7	30.9	99	16.6	4.89	73	0
2.4	7.28	17	18	7.3	102	285	9.1	128	37	12	1.2	35	1.5	2.1	51.7	60.6	5.7	0.1976	0.0912	7.2048	7.6	0.2	1.1	238	75	209	117	2.9	0.6	25.7	32.3	80	19.3	4.65	84	0
2.4	7.29	34	11	8.7	86	1065	8.1	123	32.3	9.7	8.1	79	2.3	6	12.7	24.1	1.1	0.6138	0.0651	8.5746	9.3	0.4	0.2	343	73	149	112	2.5	1.3	26.4	30	88	13.5	3.66	64	0
2.4	7.5	14	34	9.2	97	94	4.4	141	27	7.9	2.3	20	1.5	4.5	24.1	30.7	2.3	1.1718	0.434	19.3781	21.7	0.1	3.3	315	73	149	112	2.9	1.3	22.7	29.3	77	18.1	3.49	65	1
2.4	7.37	18	21	6.3	103	127	3.8	138	34.6	11.9	1.1	15	1.3	1.7	15.2	49.6	1.3	2.76	1.035	6.21	11.5	0	1	25	82	166	91	4.3	0.6	36.7	34.3	107	18.3	3.24	26	0
2.4	7.45	17	23	8.2	94	108	4.1	130	32.3	11.4	3.6	68	2.4	4.1	31.1	51.8	3.1	1.938	0.306	7.242	10.2	0	7	214	8	212	88	2.7	2.4	29.5	35.1	84	19.3	3.85	65	1
2.4	7.34	17	22	8.6	108	110	7.5	139	33.1	10.8	1.9	53	2.1	2.9	45.5	36.1	4.9	1.7372	0.4214	6.1146	8.6	0.4	3.5	116	48	105	87	4	0.5	33.9	32.6	104	14.4	3.18	83	0
2.4	7.3	14	22	7.9	119	126	6.2	149	29.1	9.5	0.7	21	2	2.9	17.2	38.9	2.1	0.26	0.052	4.836	5.2	0	0	121	47	80	85	2.4	0.4	29.7	32.4	92	15.7	3.18	45	0
2.4	7.15	20	15	9.1	112	42	6.1	141	38.5	11.5	3.5	93	2.1	6.5	20.5	37.1	2.8	0.93	0.195	6.3375	7.5	0.2	0.3	150	19	123	79	2.7	0.4	28.9	29.8	97	18.8	3.97	72	0
2.4	7.34	15	23	8.6	99	86	4.4	133	36.2	11.8	3.6	26	1.7	2.5	16.4	36.6	1.5	6.372	1.296	18.954	27	0.5	0.9	154	48	101	66	3.4	2.7	25.8	32.7	79	15.5	4.58	62	0
2.4	7.34	18	20	6.7	109	97	3	144	30.8	10.6	3	37	1.5	4	14.1	36	1.2	1.6378	0.5172	40.9019	43.1	0.1	0.1	132	49	121	62	2.3	0.5	29.1	34.3	85	13.7	3.63	69	0
2.4	7.28	15	28	8.8	103	116	4.8	141	40.7	12.9	0.9	39	2.3	4	40.1	31.5	4.1	1.1583	0.3289	12.6984	14.3	0.6	0.3	790	114	454	59	2.9	0.5	30.6	31.7	96	14.9	4.22	80	0
2.4	7.32	18	21	8.3	105	119	4.7	139	30.7	9.6	1	16	1.4	2.9	20.3	37.2	2.7	1.4875	0.3213	9.758	11.9	0.2	2.6	437	99	178	54	2.6	0.6	30.3	31.4	96	15.2	3.18	64	0
2.4	7.34	18	24	9	103	101	3.7	141	33.1	11.4	2.6	93	2	2.2	14.9	36.3	1.3	0.5018	1.0036	37.056	38.6	0.1	0.1	314	34	95	53	2.7	0.2	29.9	34.4	87	15.2	3.81	59	0
2.4	7.39	16	29	7.8	100	123	3.4	142	32.9	11.4	3.6	10	1.5	2.7	14.2	26.4	1.2	2.5662	0.8918	14.6874	18.2	0.1	0.3	435	23	153	52	2.3	0.4	32.6	34.5	95	16.2	3.48	50	0
2.4	7.37	20	20	8.7	105	95	3.6	141	40.2	13.4	3	55	2.1	3.7	16.1	29.3	1.5	0.8316	0.7056	23.6376	25.2	0.2	0	171	31	97	47	3.4	0.8	31.3	33.3	94	15	4.29	84	1
2.4	7.34	18	24	9	127	705	5.5	163	45.5	14.6	2.6	69	3.1	4.1	16	24.1	1.5	1.661	0.2114	12.6991	15.1	1.2	2.2	175	36	102	46	3.2	0.6	31.5	32.2	98	14.8	4.65	64	0
2.4	7.53	16	38	8.6	106	292	3.9	156	28.4	8.9	4.3	157	3	1.5	12.1	24.9	1.1	0.864	1.152	7.488	9.6	0	0	104	43	129	44	2.6	0.3	28.1	31.5	89	16.9	3.18	83	1
2.4	7.45	21	19	8.1	96	367	4	132	28.9	9.5	1	21	2	3.6	28.3	38.4	2.9	1.3248	0.6003	18.7128	20.7	0.2	0.2	323	22	72	43	3.7	0.5	27.1	32.9	82	16.5	3.51	87	0
2.4	7.49	13	29	7.6	99	139	5	136	24	7.9	1.5	45	1.7	3.6	16.2	33.5	1.4	0.846	1.128	25.662	28.2	0	0	148	29	174	43	3	1.5	29.1	33.1	88	16.6	2.71	85	0
2.4	7.37	20	19	8.1	101	206	4.8	135	38.7	12.9	2.2	69	2.6	3.5	14.8	26.9	1.3	0.9156	0.436	20.3394	21.8	0.1	0.4	287	55	312	43	2.6	0.4	30.6	33.2	92	16.9	4.2	62	0
2.4	7.46	15	28	8.3	100	134	4	139	34.3	11	3.7	36	1.5	2.6	25.6	40.3	2.5	0.7436	0.2816	3.3616	4.4	0.3	0.1	212	38	78	42	3.5	0.7	30.2	32	94	16.3	3.63	81	1
2.4	7.69	14	27	7.1	105	242	4.4	142	26.7	8.6	0.5	88	1.6	3.6	15.3	25.7	1.3	0.6489	0.2266	9.3421	10.3	0.5	0.4	227	33	51	40	2.1	0.7	31.3	32.4	97	14.4	2.76	86	0
2.4	7.47	13	28	9.7	99	80	3.5	136	29.8	10.3	0.6	17	1.9	4.4	13.1	26.5	1.1	1.456	0.056	1.176	2.8	3	0	55	61	81	38	4.1	0.6	32.9	34.7	95	20.9	3.14	51	0
2.4	7.33	16	24	7.7	100	127	4.7	135	40.4	13.9	1	23	1.8	3.7	23.4	30.1	2.3	0.472	0.354	8.378	11.8	0	1	369	58	95	38	2.8	1	27.8	34.3	81	16.1	4.99	21	0
2.4	7	15	25	9.5	104	144	3.9	140	30	10.5	1	17	2.1	2.9	13.9	30.1	1.2	1.0125	0.4365	2.8305	4.5	0.3	4.6	91	38	154	38	3.4	0.5	30.6	35.1	87	16	3.44	64	0
2.4	7.31	14	20	8.5	115	149	4.4	145	44.1	14.7	0.7	20	2	3.9	11.4	29.3	1	1.7584	0.5809	13.2979	15.7	0.4	0	378	19	66	38	3.4	0.4	32.4	33.3	97	13.6	4.52	60	0
2.4	7.48	16	27	8.4	99	193	6.4	136	30.5	9.5	1.4	86	2.3	4.5	16.1	39.5	1.5	1.0902	0.4266	6.2173	7.9	0.9	1.2	265	35	133	34	2.6	0.9	25.4	31	82	21.8	3.72	60	0
2.4	7.34	12	27	8.1	106	88	4.1	141	27.7	8.6	0.8	27	2	3.1	17.3	150	1.9	0.3276	0.1224	3.1068	3.6	0.3	0.9	79	23	161	34	3.6	0.7	24.9	31.1	80	17.8	3.46	27	0
2.4	7.33	12	21	9.5	127	43	4.7	155	35.3	10.5	1	57	2.2	2.5	13.4	28.3	1.2	4.1905	0.5655	9.483	14.5	0.3	1.5	244	23	203	34	2.4	0.3	27.2	29.8	91	18.3	3.87	71	0
2.4	7.34	19	17	8.4	100	252	4.9	131	35.7	10.5	1.7	55	2.1	3.8	12.3	23	1	0.6144	0.9728	23.9616	25.6	0.1	0.1	524	15	54	33	2.9	0.3	19.7	29.2	67	19.6	5.31	65	1
2.4	7.34	21	20	9.1	107	115	5.2	143	36.7	12.6	1	29	2.2	1.6	12.7	25.3	1.1	1.5846	0.556	11.4258	13.9	0.2	2.1	363	28	87	32	2.8	0.2	31.5	34.3	92	15	4	78	0
2.4	7.34	16	17	7.5	110	113	4.9	138	34.6	11.2	0.9	19	1.2	2.7	14.7	33.4	1.3	0.1965	0.2489	12.5236	13.1	0	0.9	261	23	34	28	3	0.5	28.1	32.5	86	16.1	4.01	46	1
2.4	7.31	16	26	8.2	104	237	3.8	142	33.2	11	1.1	26	1.6	2.5	13.8	26.6	1.2	2.0817	0.405	5.346	8.1	0.5	2.9	212	33	79	27	3.4	0.2	28.5	33.1	86	13.6	3.85	68	0
2.4	7.38	15	26	6.3	103	213	5.2	139	32.2	10.8	1.8	52	1.7	3.9	16.3	43.3	1.5	2.316	6.176	8.106	19.3	0	0	73	11	67	26	1.7	0.5	32.3	33.5	96	26.9	3.34	62	1
2.4	7.3	15	25	9.6	101	239	4	137	34	10.6	5	20	2	2.7	26.2	36.6	2.7	1.539	1.4445	9.9495	13.5	0.7	3.5	629	11	238	25	2.9	0.1	25.7	31.2	83	19.1	4.12	49	0
2.4	7.28	13	26	9.4	105	183	4.8	139	39.9	13.7	1.1	22	2.6	5.9	12.3	21.9	1.1	1.9856	0.5694	11.9282	14.6	0.3	0.4	367	26	98	24	4.6	0.2	32.2	34.3	94	14.1	4.24	58	0
2.4	7.37	16	21	7.7	107	124	4.9	139	34.9	11.6	0.9	28	1.5	3.2	13.7	25.1	1.2	0.222	0.148	5.698	7.4	1	2	302	15	94	24	3.3	0.3	29.5	33.1	89	16.1	3.92	88	0
2.4	7.32	22	17	7.7	112	179	3.9	147	29.4	9.2	3.8	47	1.8	4.5	32.8	47.7	7.1	0.8505	0.2673	22.9635	24.3	0.2	0.8	266	14	49	24	2	0.3	25.9	31.4	83	19.5	3.56	64	1
2.4	7.34	21	21	8.8	96	133	5.8	132	32.5	10.1	4.6	171	2.5	8.2	57.9	42.9	5.8	1.1352	0.4644	6.9402	8.6	0.1	0.6	114	15	154	21	3.7	0.7	28.5	31	92	20	3.53	71	0
2.4	7.42	16	24	9.1	103	158	4.1	139	41.1	14.1	1.6	25	1.5	1.9	14.1	25	1.2	0.636	0.53	7.526	10.6	0	0	183	31	64	21	4	1.5	27	34.4	79	13.9	5.22	56	0
2.4	7.38	21	21	8.6	103	143	4.2	141	30.1	10	1.1	24	1.6	2	15.5	30.5	1.5	1.584	1.584	32.868	39.6	0	0	517	17	87	21	3.6	0.1	29.9	33.3	90	15.4	3.35	62	0
2.4	7.44	15	34	7.7	96	110	3.6	141	26.8	8.3	2.2	44	1.8	2.6	13.7	25.3	1.2	0.8624	0.2744	4.2336	5.6	0.3	3.8	213	6	149	20	2.9	0.1	27.6	30.8	90	16.2	2.99	88	0
2.4	7.33	13	27	8.3	100	91	3.7	136	24.6	8.1	0.3	23	1.6	3.6	13.1	32.3	1.1	0.5369	0.3835	4.9619	5.9	0.1	0.2	236	23	472	20	2.2	1.1	29.4	33.1	89	15.7	2.76	60	1
2.4	7.33	15	29	6.6	100	97	3.9	140	33.9	11.7	1	6	1.7	2.3	17.5	41.6	1.6	1.2006	0.3654	4.1528	5.8	0.3	1	217	5	85	20	2.4	0.3	33.5	34.4	97	16.2	3.48	66	0
2.4	7.34	18	26	6.2	100	100	3.9	140	41.5	14.2	1.7	17	1.3	1.6	14.6	33.2	1.3	0.5775	0.3003	6.7375	7.7	0.2	1	177	17	84	20	3.1	0.2	28.7	34.3	84	14.1	4.95	69	0
2.4	7.47	13	30	8.1	110	139	5.7	147	26.6	8.6	1.5	64	2.9	3.2	24.1	33.9	2.4	0.205	1.23	18.04	20.5	0	1	153	26	57	20	2.3	0.4	32.3	32.2	101	19.4	2.65	80	1
2.4	7.25	14	14	5.6	112	161	3.4	137	30.6	9.9	1.4	34	1.3	2.7	16.1	29.6	1.5	0.152	0.152	14.896	15.2	0	0	189	27	84	20	2	0.7	30.7	32.4	95	12.8	3.23	48	0
2.4	7.16	28	11	8.1	102	270	3.1	138	40.2	13.7	1.5	38	2.5	5.3	14.6	31.1	1.4	1.16	0	13.688	23.2	0	0	501	18	159	19	2.4	0.4	28.2	34.2	82	13.8	4.88	40	0
2.4	7.39	21	15	9.2	107	420	4.3	139	31.9	9.5	1.2	20	1.7	3.9	22	32.5	2.1	1.512	0.336	14.952	16.8	0	0	450	12	147	19	2.5	0.6	25.1	29.9	84	15.8	3.79	83	0
2.4	7.34	21	24	8	97	86	4.3	138	38.3	12.2	11.1	35	1.7	5.7	32.4	43.4	3.5	0.6968	0.3886	5.4002	6.7	0.8	2.4	288	9	115	18	3.3	0.2	31.6	31.7	100	19.9	3.85	57	0
2.4	7.39	15	25	7	94	123	3.5	130	45	14.8	1.5	42	1.4	0.8	13	30.4	1.1	0.41	0.205	7.5768	8.2	0.1	0	24	16	95	17	2.5	2.4	30.8	35.1	88	11.9	4.79	23	0
2.4	7.13	16	21	8.3	102	391	6.7	132	12.3	4	2.6	94	2	4.5	12.5	27.6	1.1	1.3275	0.2925	20.3175	22.5	0.4	0.8	488	15	35	17	3.6	0.5	28.8	32.6	88	15.7	1.39	46	0
2.4	7.35	19	27	7.9	105	168	4.8	146	44.1	15.6	2.5	30	1.8	3.7	12.4	23.8	1.1	1.61	0.84	14.9275	17.5	0.2	0.5	295	17	60	17	3.4	0.5	33	35.4	93	14.1	4.73	73	0
2.4	7.18	21	16	8.3	108	159	3.6	141	32.4	10.5	1.5	27	1.9	4.2	14.4	30.8	1.2	0.864	0.576	12.672	14.4	0	0	595	10	86	17	2.9	0.4	31.4	32.5	96	15.8	3.36	81	0
2.4	7.34	19	31	9.2	91	115	4.9	136	42	11.9	2.6	14	1.9	2.3	15.3	31.2	1.4	0.896	0.3024	9.8224	11.2	0.2	1.3	567	17	375	16	3.6	0.2	27.7	28.3	98	15.6	4.29	62	0
2.4	7.37	16	17	6.8	107	88	3.6	136	31.7	11.4	0.9	24	1.2	2.6	13.7	34.2	1.3	0.114	1.026	6.954	11.4	0	1	238	9	77	16	1.4	0.4	33.8	35.8	94	14.1	3.35	49	0
2.4	7.34	14	28	9.6	101	90	3.9	139	29.5	9.8	0.9	41	2	4.3	15.7	32.1	1.4	0.68	0.068	0.867	1.7	1	4	25	5	2159	14	2.3	1.2	33	33.3	99	16.6	2.98	61	0
2.4	7.46	16	21	8.1	109	105	3.6	142	32.2	10.7	1.7	44	1.4	2.6	13.3	30.9	1.2	1.9305	0.8775	10.341	13.5	0.6	2	382	7	100	14	3.1	0.3	28.6	33.2	86	15.1	3.74	71	0
2.4	7.35	20	21	7	100	122	4.9	136	38.9	13.3	1	8	1.4	1.8	12.9	35.3	1.1	1.26	1.26	9.8	14	0	0	219	3	54	10	2.7	0.3	30.4	34.1	89	11.6	4.36	31	0
2.3	7.34	17	22	8.2	104	151	4.1	139	30.5	10	1	34	1.6	3	14.3	25.3	1.2	0.57	0.19	16.34	19	0	0	334	617	403	651	3.8	3.3	29.8	32.8	91	15.4	3.37	71	0
2.3	7.31	26	14	7.1	97	66	5	132	21.1	7.8	7.2	149	3.4	8	18.2	43	1.6	1.545	3.09	24.72	30.9	0	0	301	235	852	494	2	38.8	34.1	37	92	19.1	2.29	70	1
2.3	7.27	18	21	8.9	96	80	7.8	127	33.4	10.6	8.7	73	3	9.2	19.8	36.9	1.9	1.785	1.065	11.52	15	0.3	3.9	121	46	178	147	2.7	4	36.8	31.7	116	19.1	2.88	48	0
2.3	7.34	13	22	7	109	114	3.2	141	34.3	12	1.3	15	1.4	2.1	16.7	33.3	1.5	0.285	0	8.17	9.5	0	0	122	162	48	139	3.6	1.6	31.9	35	91	13.4	3.76	25	0
2.3	7.34	8	28	8.1	88	103	3.1	121	26	9	0.8	12	1.3	3.2	21.1	37.3	2	2.516	0.888	10.36	14.8	0	2	11	69	197	101	2.7	10.2	37.6	34.8	108	16.7	2.41	66	0
2.3	7.37	15	27	8.8	94	104	4.2	132	37.8	13.7	0.8	8	1.8	3	14.1	24.7	1.2	2.6712	0.954	17.5112	21.2	0.2	0.1	306	50	367	84	2.9	2.3	31.4	36.3	87	16.7	4.37	77	0
2.3	7.35	32	20	7.9	79	138	6.6	124	38.1	13.5	6.6	129	2.2	5.2	17.3	30.5	1.6	1.2546	0.2829	10.7256	12.3	0.1	0.1	687	153	688	80	4.8	2.5	26.3	35.5	74	16.2	5.16	40	0
2.3	7.12	13	23	6.5	104	137	4.2	136	31.1	10	1.3	31	2.1	5.2	13.6	34.4	1.2	0.037	0	0.888	3.7	0	0	66	55	59	79	2.2	0.6	37.9	32.2	118	14.4	2.64	58	1
2.3	7.38	13	21	6.1	101	95	3.7	131	28.6	9.7	0.7	12	2	2.3	14.6	35.9	1.3	0.4125	0.3366	2.5014	3.3	0.1	1.5	65	48	80	75	2.8	2.3	36.1	33.8	107	15.8	2.68	56	0
2.3	7.42	14	25	8.5	102	216	4.6	136	32	9.8	2.2	94	2.4	5.2	15.2	33.4	1.4	1.2136	0.4838	6.109	8.2	1.4	3.4	253	38	138	71	2.9	0.6	25.5	30.6	83	21.8	3.85	60	0
2.3	7.42	13	28	8.8	99	114	4.3	136	24.4	8	0.6	38	1.9	3.9	10.5	23.6	1	0.48	1.952	0.48	3.2	0	1	46	109	343	64	3.7	0.4	29.9	32.7	92	14.8	2.66	67	1
2.3	7.34	15	23	8.1	107	125	5.3	140	28.5	8.8	2.5	50	2.5	5.4	37	37.1	3.8	0.504	0.5544	24.066	25.2	0.2	0.1	352	41	73	64	2.8	0.6	24.5	31	79	16.3	3.6	64	1
2.3	7.34	16	26	9.1	100	76	4.5	137	35.6	12.3	0.8	18	1.7	3.6	12.8	30.3	1.1	0.26	0.325	5.785	6.5	0	0	179	68	55	53	4.4	0.3	30	34.4	87	13.7	4.1	45	0
2.3	7.36	18	21	9.1	96	116	5	130	30.5	9.8	1.4	52	2.2	3.7	18	29.4	1.6	3.0056	1.3	5.9488	10.4	0.7	0.7	280	36	99	51	3	0.9	28.2	32.2	88	17.6	3.49	85	0
2.3	7.43	21	25	9.7	94	107	5.1	135	30.9	9.4	8.2	33	2	1.6	14	34	1.3	0.7259	0.3689	10.472	11.9	0.1	2.7	366	19	99	46	3.2	0.7	25.8	30.4	85	16	3.63	62	0
2.3	7.39	17	26	8.9	100	174	4.5	138	37.3	12.6	0.6	15	1.6	4.3	12.4	25.6	1	0.7272	0.2323	9.1001	10.1	0.1	0.2	182	59	61	44	3.3	0.7	29.6	33.8	88	12.7	4.27	42	0
2.3	7.34	13	27	7.6	95	104	4	131	30	9.9	0.6	14	1.6	3.1	13.4	27.3	1.1	0.247	0.0975	6.123	6.5	0.2	0.3	279	12	113	39	2.2	0.5	27.5	33.1	83	16.3	3.6	64	0
2.3	7.48	16	24	7.6	99	182	4.2	135	34.6	12	1.6	35	2.1	4.1	22.5	38.3	2.2	0.616	0.5632	16.368	17.6	0.2	0.1	195	30	58	38	3.6	1	29.1	34.6	84	17.9	4.11	87	0
2.3	7.31	22	22	8.2	105	188	4.2	145	31.6	10.1	6.1	69	2.1	4.8	13.1	34.7	1.2	5.7368	0.852	21.2148	28.4	0.7	1.4	296	29	189	38	2.7	0.3	29.6	31.9	93	18.9	3.4	73	0
2.3	7.1	18	22	6.3	90	106	5.4	125	36.2	11.6	1	19	1.3	2.6	10.3	32.5	0.9	0	0	26.319	28.3	0	0	372	14	58	37	3.3	0.5	30.7	32.2	95	12.8	3.79	54	0
2.3	7.2	15	28	8.8	104	189	4	143	45.3	14.6	0.6	17	2.5	5.5	13.1	28.3	1.1	4.1838	1.1744	31.1216	36.7	0.3	0.2	423	36	209	37	2.7	0.6	27.5	32.3	85	13.9	5.31	52	0
2.3	7.31	20	17	7.8	106	96	4.4	139	39.7	12.8	2.8	50	1.5	5.4	15.7	41.2	1.6	0	0.198	2.178	9.9	0	0	124	15	56	34	2.4	0.6	32.8	32.3	102	14.2	3.9	80	0
2.3	7.21	18	16	6.1	110	123	3.6	140	27.4	9.5	0.6	12	1.5	3.9	15.9	40.4	1.4	0.847	0.3388	6.006	7.7	0.23	0.96	106	12	36	34	1.7	1.4	32.2	33.8	95	13	2.42	57	0
2.3	7.49	15	27	7.5	96	149	3	135	32.5	12.1	1.7	35	1.5	2.8	38.8	43	4	0.975	0.91	4.55	6.5	1	0	48	14	98	33	3.3	2.6	31.6	37.3	85	16.7	3.84	65	0
2.3	7.41	18	31	16.5	96	146	4.9	140	40.7	13.5	3	45	2.9	4	13.1	22.9	1.1	1.4673	0.603	17.8689	20.1	0.2	0.6	472	16	92	32	4.2	0.4	30.5	33.1	92	12.5	4.42	67	0
2.3	7.43	17	29	8.5	98	225	4.9	139	33	10.7	6.5	38	2.2	3.7	13.1	36.2	1.2	0.416	0.0512	5.8432	6.4	0.3	1.1	133	25	120	32	3.4	0.6	32.3	32.5	99	13.1	3.32	70	0
2.3	7.43	12	18	7	111	122	3.4	138	31.2	9.4	1	13	1.6	2.2	16.1	37.5	1.4	0.655	0.393	11.659	13.1	0	0	522	15	122	31	2.1	0.8	22.9	30.2	76	18.8	4.11	46	0
2.3	7.4	13	19	10.4	104	113	3.3	133	26.9	9.4	1.6	21	1.4	3.8	15.4	33.9	1.4	0.5184	0.2862	4.3686	5.4	0.3	3.9	109	18	75	30	3.6	1.9	31.5	34.8	91	17.9	2.97	61	0
2.3	7.16	23	5	6.5	84	194	2.6	121	36	10.7	8.1	176	1.7	9	16.1	33.8	1.6	0.7656	1.3398	7.2732	9.57	0	0	214	17	97	29	3.1	0.3	31.5	37.9	83	15.7	3.39	58	0
2.3	7.33	7	45	8	86	77	4.6	133	37.3	12.7	0.2	13	2.2	2.7	13	75.2	1.1	0.6572	0.53	9.275	10.6	0.1	1.2	401	34	70	28	2.1	0.4	33.5	34.1	98	15.4	3.8	75	0
2.3	7.25	15	28	8.7	104	113	3.3	144	34.9	11.5	1.4	18	1.6	3	13.1	24.8	1.1	2.536	0.634	24.092	31.7	0	0	230	18	74	27	3.3	0.5	31.3	33	95	14.8	3.68	79	0
2.3	7.34	17	27	7.6	97	106	4.2	137	31.8	10.8	2.1	32	1.9	3	13.3	27.3	1.1	1.104	0.3243	5.244	6.9	0.6	2.7	206	19	176	26	3.9	1.2	28.9	34.1	85	14.4	3.75	54	0
2.3	7.34	15	23	8.1	102	125	4.4	136	35.9	12.6	1.4	31	1.9	3.5	15.8	33.2	1.4	0.749	0.321	7.276	10.7	0	0	136	21	72	26	3.4	0.9	33.8	35	97	13.8	3.72	64	0
2.3	7.45	17	26	9	105	104	6.7	141	37.6	11.9	0.8	13	2.1	3.8	17.8	36.3	1.8	0.9576	0.1767	4.3377	5.7	1.2	2.9	385	17	146	22	3.9	0.5	32	31.6	101	15.4	3.7	74	0
2.3	7.34	15	27	9	94	111	4.2	132	42.8	14.6	0.8	11	1.5	2.9	14.4	33.6	1.3	1.0707	0.8514	10.8876	12.9	0.4	0.4	240	23	102	21	3.9	0.9	27.9	34.1	82	12.1	5.24	40	0
2.3	7.31	14	26	7.4	98	162	4.1	134	34.3	11.5	0.6	20	1.7	3.4	12.9	24.9	1.1	1.353	0.738	18.2245	20.5	0.4	0.5	249	10	57	20	2.9	0.2	32.4	33.4	97	16	3.54	81	0
2.3	7.25	29	11	8.2	103	712	4.7	138	32.3	9.7	1.5	46	2.1	5.5	13.8	24.2	1.2	2.8	1.26	30.905	35	0.1	0.1	365	30	148	19	3.9	0.2	26.7	30	89.1	14.9	3.62	48	0
2.3	7.34	16	23	8.9	103	84	3.7	136	28.7	8.9	1.4	22	1.4	2.3	24.5	34.2	2.3	3.816	0.8215	21.571	26.5	0.3	0.9	262	19	90	18	3.8	0.6	25.5	30.9	83	20.6	3.47	66	0
2.3	7.36	19	22	7.3	93	317	4.1	130	29.7	10.4	4	95	2.2	6.4	15	27	1.5	0.668	0.835	14.696	16.7	0	0	153	10	134	17	3.6	0.4	33	35.1	94	19.8	3.17	68	0
2.3	7.53	17	26	10	98	169	5.1	136	31.3	10.2	0.5	12	1.8	4.4	13.1	89.9	1.2	2.928	0.915	14.091	18.3	1	0	778	16	60	16	2.9	0.4	29.8	32.6	91	14.7	3.43	57	0
2.3	7.44	12	31	7.3	101	91	4.2	140	30.7	9.8	2.5	22	2.1	3.8	15.9	42.8	1.4	1.1484	0.396	4.8906	6.6	0.4	2.1	183	9	157	16	1.9	0.2	32.1	32	101	16.5	3.05	71	1
2.3	7.35	13	35	8.8	101	134	4.5	144	34.4	10.9	0.5	10	1.3	2.9	12	25.4	1	1.2371	0.3115	6.8085	8.9	0.7	5.3	219	12	149	15	3.5	0.2	28.7	31.6	91	16	3.79	40	0
2.3	7.18	17	21	7.6	103	166	6.6	134	33	11.4	4.5	72	2.1	4.4	12.5	27	1	0.7493	0.381	11.4427	12.7	0.2	0.8	129	13	149	14	2.9	0.3	30.7	34.4	89	14.2	3.71	64	0
2.3	7.4	13	24	9.1	105	93	4.2	138	36.3	12	0.7	15	1.9	2.6	13.9	32.8	1.2	0.594	0.264	5.6496	6.6	0.8	0.7	261	2	90	10	3.7	0.4	27.7	33.2	83	13.9	4.35	63	0
2.3	7.32	31	11	8.2	96	90	7.5	130	35.9	10.7	7.7	101	1.8	6.2	13.3	21.8	1.1	2.512	0	27.946	31.4	0	0	606	9	158	5	2.8	0.1	28.8	29.9	96	16.8	3.73	61	1
2.2	7.11	19	15	7.3	100	212	5.1	129	35.4	11.8	1.9	43	1.9	4.6	16	35	1.4	1.7004	0.7412	19.293	21.8	0.3	0.1	288	1568	133	2451	2.8	0.3	28.7	33.2	86	14.4	4.11	63	1
2.2	7.24	14	21	7.4	100	224	5.1	130	29.5	9.6	2.3	43	1.6	3.8	11.8	29.2	1	1.032	0.516	6.536	8.6	0	1	262	318	208	467	3.4	0.4	34.8	32.6	107	15.5	2.76	52	0
2.2	7.49	12	28	7.7	86	105	3.5	122	41.8	15.7	0.6	14	1.9	2.3	12.9	28.9	1	1.992	0.498	4.98	49.8	0	0	60	666	242	408	3.7	7.3	31.9	37.5	85	13.7	4.92	67	1
2.2	7.42	15	27	7.5	106	337	6	142	36.2	11.4	2.6	77	2.5	5.2	12.7	24.8	1.1	1.7466	0.284	12.0132	14.2	0.2	0.9	283	195	311	235	2.5	0.4	29.4	31.5	93	14.9	3.89	64	1
2.2	7.49	12	30	9	103	159	3.9	141	32.8	10.3	2.3	37	1.7	2.6	15.7	35.9	1.4	1.2549	0.3293	6.8708	8.9	0.5	4.5	331	104	264	173	2.6	0.3	30.3	31.5	97	17.4	3.4	73	0
2.2	7.34	16	28	8.3	99	199	4.9	138	34.6	11.8	1.5	33	1.8	4	14.5	24.5	1.3	0.6363	0.2121	9.1102	10.1	0.5	0.9	178	86	88	158	3.8	1.6	31.1	34.1	91	13.5	3.79	80	0
2.2	7.29	17	17	7.9	109	113	3.8	139	32.7	10.6	2.7	42	1.6	2.3	15.3	34	1.3	0.164	0.164	5.822	8.2	0	0	75	132	150	145	3.4	5.7	31.4	32.4	97	13.6	3.38	77	0
2.2	7.34	14	20	7.2	112	125	3	143	29.4	9.9	1.1	16	0.9	0.7	15.3	30.8	1.3	0.72	0.27	6.3	9	0	0	90	111	60	142	3.3	1	22.6	33.9	67	15.5	4.41	63	0
2.2	7.34	19	24	7.7	99	147	4.1	138	32.7	9.6	5.7	54	1.7	5.3	15.8	97.9	1.7	0.93	0.465	41.85	46.5	0	1	153	52	1054	139	2.6	0.7	26.4	29.3	90	17.7	3.63	67	1
2.2	7.36	12	22	7	109	118	4.2	139	35.2	11.9	0.9	17	1.6	1.5	23	55.4	2.2	0.42	0.07	0.63	3.5	0	0	125	89	115	139	2.3	0.8	32.1	33.6	95	13.2	3.7	80	0
2.2	7.09	23	16	9.6	106	330	4.5	140	41	13.6	1.4	27	1.8	1.5	24.2	150	3.9	0.852	0.639	17.892	21.3	0	0	212	113	87	121	2.9	0.7	31.8	33.1	96	13	4.27	72	0
2.2	7.48	14	28	11.9	105	128	3.7	143	34.2	11.3	0.9	35	2.6	3	14.5	20.3	1.3	0.282	0.282	9.87	14.1	0	0	339	27	159	120	2.3	0.9	30.7	33	93	18.3	3.67	83	0
2.2	7.4	8	27	8.2	114	83	3.6	145	34.7	12.2	0.9	37	2.2	3.3	16.8	34	1.5	0.286	0.715	11.869	14.3	0	0	55	46	104	117	1.8	11.8	34.8	35.2	99	15.8	3.51	57	0
2.2	7.13	13	27	7.7	98	191	3.5	134	45.7	16.1	1.6	25	1.2	4.6	18.1	51.4	2.2	0.684	0.108	0	0.9	0	6	81	31	28	116	3.2	0.4	31.7	35.2	90	12	5.06	29	1
2.2	7.58	14	47	9.7	68	212	2.3	127	40.7	14.4	1.7	38	2.9	2.8	30.9	28.5	3.1	0.816	0.4216	12.308	13.6	0.3	0.1	235	73	149	112	4.2	1.3	31	35.5	87	14.8	4.66	51	0
2.2	7.49	9	29	9.1	102	94	3.8	136	37.8	13.1	0.9	13	1.7	3.1	16.8	36.9	1.8	1.8286	0.4674	5.7728	8.2	0.3	1.3	110	73	231	112	3.1	12.7	35.5	34.7	102	16.1	3.7	50	0
2.2	7.34	20	22	7.8	102	113	4.4	140	41.8	13.6	1.1	26	1.2	2.3	17.5	21	2	0.972	0.324	11.988	16.2	0	1	293	73	149	112	2.9	1.3	29.7	32.6	91	13.8	4.6	88	0
2.2	7.43	15	26	8.5	103	143	4.3	140	30.3	11	2.1	53	1.7	2.7	12.1	23.7	1	1.1661	0.6141	4.8231	6.9	0.1	4.3	163	73	149	112	2.9	1.3	31.7	36.2	88	13.9	3.46	81	0
2.2	7.38	15	26	9.3	108	119	4	145	42.5	13.8	0.9	19	1.9	2.4	12.2	25.9	1	0.7095	0.43	19.9735	21.5	0.3	1.5	224	73	149	112	2.9	1.3	29.3	32.4	91	15	4.7	64	0
2.2	7.33	12	23	7.7	114	95	5.4	144	35.8	11.3	1.4	24	1.8	2.4	12.8	21.9	1.1	1.947	0.531	15.222	17.7	0	0	521	73	149	112	2.3	1.3	28.8	31.6	91	17.2	3.93	71	0
2.2	7.33	18	22	8.2	98	151	4	134	41.2	13.9	1.8	31	1.2	3.1	17.9	47.2	2.1	0.51	0.255	7.565	8.5	0	0	54	71	113	106	3.3	2.5	29.3	33.7	87	17	4.74	56	0
2.2	7.34	15	26	7.7	101	121	4.9	137	41.1	14	1.4	31	1.8	2.6	12.2	42.2	1.1	0.5537	0.4181	10.0005	11.3	0.3	2.6	145	92	126	97	3.5	0.4	32.1	34.1	94	13.6	4.36	64	0
2.2	7.37	16	20	7.2	109	143	4.6	140	28.3	9.3	2.4	52	1.9	4.6	18.5	31.3	1.7	1.05	0.15	12.3	15	0	0	164	45	141	77	2.9	0.9	29.8	32.7	91	13.7	3.11	72	0
2.2	7.32	16	26	9.9	100	114	3.8	138	40.6	13.4	1	10	1.8	3.8	14	34.3	1.2	0.7527	0.0741	2.9757	3.9	1	1.4	115	54	79	73	2.4	0.5	28	33	85	16.5	4.78	53	0
2.2	7.32	20	23	10.6	101	115	4.5	139	36.1	12.3	0.8	19	1.9	2.2	12.4	24.3	1.1	0.293	0.586	21.389	29.3	0	0	233	52	450	73	4	0.7	26.7	33.9	79	15.3	4.6	85	0
2.2	7.33	11	22	7.6	114	100	4.2	143	28.3	9.1	0.6	24	1.8	2.5	12.6	25.9	1.1	0.475	0.19	7.98	9.5	0	0	232	37	190	67	2.5	0.4	26.7	32.3	83	16.5	3.42	81	1
2.2	7.47	13	26	9.1	103	99	3.4	139	30.4	10.7	0.6	11	1.6	3.8	11.4	21.6	0.9	0.081	0.036	0.702	0.9	0	0	78	186	59	64	3.6	0.5	32.2	35.1	92	13.9	3.31	45	0
2.2	7.44	14	26	7.2	94	136	3.8	130	35.7	12	0.8	34	1.8	2.5	25.7	35.4	4.4	0.242	0.484	9.68	12.1	0	0	175	51	171	62	3	0.8	29.8	33.5	89	14.7	4.02	83	0
2.2	7.3	16	21	9.4	104	158	6.2	135	26.3	8.9	1.4	23	2.1	1.8	14.1	31.6	1.2	0.438	0.876	17.301	21.9	0	14	171	23	87	56	3.7	0.3	30.7	33.9	91	16.3	2.9	67	0
2.2	7.48	18	22	8	98	105	4.5	133	35.5	11.9	1.2	27	2.1	3	13.8	25.3	1.2	2.034	0.6554	8.5767	11.3	0.3	0.1	341	40	95	54	2.5	0.6	24.3	33.4	73	19.3	4.87	76	0
2.2	7.34	21	18	7.8	81	89	6.6	113	24.3	7.7	0.9	43	2.6	2.3	13.3	33.8	1.1	0.167	0.167	16.366	16.7	0	0	1053	20	91	51	2.7	0.3	24.8	31.8	78	18.6	3.1	37	1
2.2	7.44	13	29	8.4	105	183	3.9	143	35.8	11.1	1.2	44	1.9	5.4	12.8	25.8	1	2.254	0.63	8.764	14	0.7	16	241	300	31	50	2.7	2.9	26.1	31	84	17.1	4.25	45	0
2.2	7.3	18	16	6.9	106	135	4.3	136	38.4	12.4	3.4	54	1.4	2.6	13.7	28.3	1.2	0.663	0.6409	20.6414	22.1	0.1	0.6	240	15	81	45	2.9	0.5	25	32.4	77	17	4.99	82	0
2.2	7.49	13	31	8.4	92	270	3.2	133	38.1	13.7	0.8	25	2.6	2.4	14.6	52.7	1.3	0.984	3.28	26.24	32.8	0	0	241	63	65	43	2.8	0.9	36.1	36	100	13.6	3.81	65	0
2.2	7.29	17	15	8.2	114	113	5.3	141	29.5	9.8	3.4	95	2.5	4.5	15.4	38.8	1.4	0.684	1.14	8.892	11.4	0	0	370	30	165	42	1.9	0.3	29.9	33.3	90	16.7	3.28	84	1
2.2	7.4	13	18	8.8	110	93	4.5	136	24	8	1.4	21	2	4.2	29.2	41.2	3	0.648	0.072	3.26	4	0.1	0.4	110	30	114	41	3.2	1	32.4	33.2	98	13.9	2.46	64	0
2.2	7.34	15	25	9	99	117	4.6	134	21.8	7.2	1.1	28	2	3.5	14.9	24.3	1.3	0.16	0	0	1.6	0	0	19	58	490	40	2.8	1.9	26.7	33.1	81	18.4	2.7	67	0
2.2	7.37	14	27	8.8	96	159	3.2	134	35.3	11.5	0.7	16	1.9	2.9	12.9	22.2	1.1	1.7845	0.4565	5.9926	8.3	0.3	0.4	429	67	99	39	4.2	0.5	26.6	32.6	82	20.6	4.32	54	0
2.2	7.48	14	22	8.4	104	109	5.5	134	27	10.1	1.5	46	2.3	3.7	18.8	41	1.8	0.027	0.144	0.693	0.9	1	0	117	31	125	38	3.1	1.4	34	37.3	91	17.4	2.96	85	1
2.2	7.41	18	20	11.1	95	94	3.7	129	34.9	11.5	3.6	55	2.5	6.5	15	43.3	1.5	1.1155	0.3783	8.0413	9.7	1	0.7	411	24	196	37	2.5	1	27.6	33.1	84	16.1	4.17	43	0
2.2	7.34	20	24	8.4	95	88	8.3	131	34.1	11.7	4.6	48	2.3	4.6	46.5	36.7	5	0.8362	0.4633	9.8988	11.3	0.1	0.8	169	26	103	37	3	0.3	26.9	34.4	78	17.4	4.37	61	0
2.2	7.34	18	26	9.4	97	115	3.8	137	37.9	12.9	0.6	13	1.8	3.3	13.4	26.1	1.2	1.2903	0.6171	16.6617	18.7	0.2	0.5	432	45	88	37	4.3	0.6	27	34	80	13.5	4.77	57	0
2.2	7.29	13	17	8.2	115	121	3.5	141	32.1	10.3	1.2	41	1.6	3.6	13.1	27.2	1.1	0.488	0.28	7.2	8	0.2	0.2	174	25	163	35	3.1	0.5	27.2	32.2	84	15.8	3.8	81	0
2.2	7.34	18	26	7.3	96	81	4	136	23.3	7.2	5.9	56	1.1	3.7	27.7	32.1	2.7	0.205	0.04	4.73	5	0.2	0.3	251	21	65	33	2.7	0.2	32.3	30.8	105	22.7	2.22	62	0
2.2	7.21	17	28	6	96	170	3.4	138	28.3	9.7	4.1	54	2.5	7.6	15.1	35.6	1.4	2.7258	0.3186	8.673	11.8	0.4	0.4	196	26	128	33	2.6	0.4	31.2	34.3	91	14.8	3.1	72	0
2.2	7.31	15	22	6.7	106	228	3.6	139	28.7	8.5	1.2	40	1.7	2.6	48.6	61.5	5.2	0.4264	0.328	7.3964	8.2	0.2	0.4	158	25	59	33	2.7	0.4	23.1	29.7	78	19.7	3.68	68	0
2.2	7.29	18	18	6.5	101	71	4.2	133	19.5	6.3	3.7	75	1.5	5.3	13.5	22.8	1.3	0.17	1.02	1.836	3.4	0	0	10	47	272	32	2.8	1.1	29.2	32.4	90	15.1	2.16	67	0
2.2	7.38	12	29	9.5	104	121	3.2	142	41.8	13.7	1.5	25	2.1	3.4	12.3	37.8	1.1	2.6243	0.2934	13.1215	16.3	0.3	1.2	141	22	52	31	2.6	0.8	31.8	32.7	97	12.6	4.3	68	0
2.2	7.34	19	23	7.7	93	148	4.8	130	21.7	7.4	3.6	105	1.9	5.8	42.3	39.8	4.8	0.5206	0.3288	26.304	27.4	0.1	0.8	230	12	97	29	3	0.7	31	33.9	92	18.5	2.37	88	0
2.2	7.51	17	31	9	95	129	4.4	139	30.8	10	5.2	42	1.8	1	13.9	30	1.2	1.431	1.053	24.489	27	0.1	0.1	387	32	104	29	3.1	0.4	28.4	32.5	88	14.3	3.52	57	0
2.2	7.32	18	18	8.4	100	205	3.5	132	26.1	9.3	1.3	66	2.5	3.1	13.7	26.9	1.3	0.772	0.386	17.949	19.3	0	0	244	30	99	29	2	0.2	33.9	35.7	95	15.7	2.75	82	0
2.2	7.42	16	20	6.9	100	117	4	132	37.7	12.7	0.9	19	1.4	2.6	14.6	28.4	1.3	0.606	0.1111	9.3021	10.1	0.3	0.5	237	25	93	28	2.9	0.4	29.7	33.8	88	14	4.29	71	0
2.2	7.39	14	22	8.7	107	174	4.1	139	35.3	10.6	0.6	10	1.6	3.6	13.3	96.7	1.2	1.001	0.4004	7.098	9.1	0.23	0.96	431	17	87	26	2.7	0.2	29.6	32.7	91	14.4	3.57	52	0
2.2	7.4	14	33	8.7	96	68	3.6	139	32	10.7	3.8	19	1.8	4.1	24.2	34.5	2.4	0.5291	0.3289	13.3705	14.3	0.2	0.2	246	16	143	25	3.4	0.4	26	33.5	77	22.4	4.14	68	0
2.2	7.34	14	22	8.9	105	84	3.7	137	33.5	11	0.6	7	1.7	2.4	13.7	32.2	1.2	0.1566	0.1392	8.4042	8.7	0.1	0	395	34	284	25	3.1	0.4	28.6	32.8	87	15.6	3.83	47	0
2.2	7.34	16	28	8.4	109	61	4.7	148	29.3	9.8	1.5	34	1.9	2.7	25.4	43.5	2.3	27.71	0.978	0.652	32.6	0	0	128	20	122	25	2.5	0.5	31.4	33.5	94	16.7	3.12	85	1
2.2	7.34	23	24	11.2	99	105	4.1	142	31.7	9.9	4.8	25	2.2	7.7	14.7	31.3	1.3	1.8963	0.8772	9.9588	12.9	0.2	1.2	307	17	152	24	3.7	0.3	29.6	31.2	95	14.9	3.34	51	0
2.2	7.34	19	22	9.1	94	143	3.7	131	34.8	12.1	0.7	20	1.9	3.8	12.4	39.5	1.1	1.91	0.382	16.044	19.1	0	0	225	47	97	23	3.4	0.6	31.9	34.7	92	19.1	3.78	73	0
2.2	7.34	13	30	9.9	102	106	4.4	141	39.1	12.8	0.4	27	1.7	3.3	12.5	31.9	1.1	4.1313	0.7191	8.9958	14.1	1.7	0.1	549	35	75	23	3.9	0.6	32.9	32.8	101	13.3	3.89	59	0
2.2	7.28	14	22	7.5	109	98	3.8	141	40.2	13.1	1.2	24	1.7	2.1	15.7	37.7	1.5	0.644	0.5336	17.0384	18.4	0.1	0.8	133	13	75	23	3	0.4	33.7	32.5	104	13.6	3.88	64	1
2.2	7.34	17	21	9.1	116	306	3.9	150	22	7.3	2	78	2.7	3.5	15.9	26.2	1.4	0.7668	0.8316	9.18	10.8	0.1	0.2	202	15	93	22	2.8	0.6	32.3	33.4	97	14.5	2.27	64	1
2.2	7.34	22	22	9.2	93	223	3.9	133	31.4	10.4	2.8	107	2.2	5	38	39.9	3.9	0.4633	0.4068	10.3395	11.3	0.2	0.5	466	16	155	21	3.7	0.7	31	33.3	93	17.6	3.37	64	0
2.2	7.45	25	14	8.6	97	239	6.1	130	36.2	12.3	4.4	141	2.7	6.9	13	28.6	1.1	0.2025	0.081	7.8003	8.1	0.1	0.1	257	23	153	21	3.4	1.4	29.7	34.1	87	17.9	4.16	57	0
2.2	7.33	19	27	9.1	99	272	4.1	141	30.7	9.6	4.7	30	1.9	1.9	14.6	44.1	1.3	1.0064	0.3848	13.3348	14.8	0.4	0.2	305	10	74	21	2.2	0.4	27.4	31.3	87	17.9	3.51	69	0
2.2	7.15	10	34	8	103	100	3.8	143	28	9.2	2.2	36	2.1	4.5	14.2	33.3	1.3	2.508	23.199	28.215	62.7	0	0	170	8	79	21	2.9	0.3	30.6	32.6	94	16.5	2.99	86	1
2.2	7.39	17	23	8.7	107	128	3.6	143	30.7	9.4	1	12	1.1	2.2	16	30.9	1.5	2.6936	0.8436	10.8928	14.8	0.3	2.2	203	19	102	21	3.4	0.5	26	30.6	85	19.7	3.61	66	0
2.2	7.31	14	21	8.3	109	75	3.4	141	39.2	13.1	0.5	11	2.1	2.4	11	31.5	0.9	1.085	0.21	5.39	7	0.4	4.1	240	14	59	21	3.3	0.4	33.3	33.4	100	14.6	3.93	65	0
2.2	7.32	20	15	9	110	166	3.7	141	27.4	9.7	1.3	45	1.2	2	12.2	24.5	1	0.884	0.351	11.687	13	0.1	0.4	241	17	160	21	3.3	0.2	30.8	35.3	87	14.9	3.14	52	1
2.2	7.41	18	25	10.3	97	150	6.1	134	28.1	9.6	2.9	98	2.1	5.2	12.8	23.8	1.2	0.583	0.159	4.134	5.3	0	1	239	25	117	20	3.3	0.5	27.4	34	81	16.8	3.5	61	0
2.2	7.36	17	22	8.6	98	81	4.1	133	33.2	10	0.6	17	1.7	4	16.6	33.8	1.8	0.8755	0.5253	8.7756	10.3	0.3	0.8	463	16	152	20	2.2	1	27.5	30	92	16	3.62	61	0
2.2	7.46	18	26	7.1	111	129	5.1	150	33.2	10.7	1.2	95	2.6	4	13.6	29.4	1.3	2.2912	1.1635	14.0157	17.9	0.6	1.8	241	24	48	20	2.8	0.2	27.1	32.3	84	16.5	3.96	79	0
2.2	7.44	22	33	13	85	98	3.6	136	33.7	12	2.5	24	1.8	3.4	14.9	23.8	1.3	1.6432	0.948	13.1456	15.8	0.2	0.1	742	9	262	19	3.9	0.6	28.7	35.5	81	14.3	4.16	49	0
2.2	7.33	13	28	8	102	216	3.4	140	36.3	12.3	1.2	33	2.8	2.8	23	35.5	2.2	1.2744	1.2744	21.0276	23.6	0.1	0	272	29	52	19	3.3	0.3	24.5	33.8	72	15	5.01	63	0
2.2	7.45	14	29	8.1	102	98	4.3	141	27.6	9	1.7	29	1.8	4.3	13.4	26.1	1.1	0.2376	0.2106	4.779	5.4	0.5	2.7	179	10	76	19	3.3	0.2	29	32.5	89	15.8	3.09	89	0
2.2	7.24	18	23	11.4	97	89	5.9	132	32.2	10	4	72	2.3	1.9	11.4	34.7	0.9	1.638	0.585	5.499	11.7	0	0	370	13	434	18	2.3	0.4	29	31.2	93	16.8	3.46	77	1
2.2	7.36	15	31	8.5	102	96	3.9	139	42.8	13.1	1	17	2.1	4.2	17.8	36.3	1.8	0.9717	0.2214	2.706	4.1	1.2	3.7	320	20	130	18	2.9	0.6	26.7	30.6	87	18.8	4.9	74	0
2.2	7.53	16	27	8.7	100	101	3.1	140	32.1	10.8	0.8	17	1.5	2.6	11.6	21.4	1	1.38	0.598	2.392	4.6	0	0	190	26	75	17	2.9	0.6	31	33.8	92	16.1	3.5	27	0
2.2	7.39	13	24	9.3	107	161	4.7	139	27.3	9.4	0.9	16	1.9	3.3	13.3	27.6	1.2	0.84	0.1204	1.7388	2.8	0.5	3	115	9	53	17	2.9	0.5	27.9	34.3	81	17.5	3.36	75	0
2.2	7.38	14	19	7.9	108	119	4	137	26.7	9.1	0.6	9	1.6	3.7	18.2	31.6	1.7	3.1659	0.7439	12.8366	17.3	0.3	3	335	10	116	16	1.8	1.8	29.4	34.2	86	14	3.1	55	0
2.2	7.34	17	16	7.8	114	99	4.9	142	31.6	10	1.4	33	1.5	3.6	20.9	40.5	2.9	1.6362	0.4848	7.7265	10.1	0.5	2	277	6	98	16	3.2	0.3	28.9	31.8	91	17	3.48	73	1
2.2	7.37	14	18	7.7	114	157	4	142	25.9	8.1	1.1	29	1.6	3.1	27.1	43.3	2.7	0.742	0.318	8.692	10.6	0	0	448	14	82	16	2	0.3	26	31.4	83	19	3.13	68	1
2.1	7.34	12	12	4.3	123	92	3.4	144	25.5	7.6	1.1	38	1.2	3.1	14.8	28.7	1.3	0.4671	0.2768	16.5042	17.3	0.1	0.2	238	3211	72	3169	2.9	0.7	29.4	29.7	99	13.9	2.57	86	0
2.1	7.41	16	22	6.8	102	99	3	137	32.7	10.7	0.7	28	1.9	3.7	15.7	62.7	1.6	0.921	1.228	26.095	30.7	0	0	167	950	185	638	2.2	22.4	30.4	32.7	93	17.7	3.52	52	1
2.1	7.47	11	26	7.4	104	186	4	137	29.8	10.3	1.1	16	2.3	1.3	13.2	24.4	1.2	0.348	0	16.182	17.4	0	0	265	77	48	239	2.6	0.4	29.2	34.4	85	13.8	3.51	34	0
2.1	7.39	19	24	9.6	94	126	7.6	129	37.5	12.4	1.5	58	2.6	3.3	59.5	72.4	6.7	1.596	0.855	16.416	19	0.3	0.4	259	39	73	127	2.9	0.9	28.5	33	86	16.5	4.35	67	0
2.1	7.44	16	15	8	116	100	4.2	143	35.2	11.6	2.6	79	2.3	3.9	17.4	50.7	1.6	1.152	0.2816	23.3728	25.6	0.4	2.7	329	105	326	122	1.8	0.7	31.1	33	94	16.9	3.73	85	1
2.1	7.17	23	17	7.6	103	99	6.1	137	37.6	11.5	5.1	53	1.5	7.6	23.6	40.3	2.3	0.384	0.768	8.064	12.8	0	0	318	73	149	112	2.9	1.3	27.6	30.6	90	17.2	4.18	58	1
2.1	7.27	12	25	8.2	104	118	3.7	137	43.3	14.4	0.7	10	1.8	2.8	13	26.2	1.1	2.2984	0.3808	10.8664	13.6	0.2	0.2	273	73	149	112	2.9	1.3	36.2	33.2	109	23.3	3.97	50	0
2.1	7.51	16	25	8.4	104	130	3.9	141	30	9.7	1.9	88	1.9	3.3	16.8	38.5	1.5	1.74	1.131	14.3898	17.4	0.2	0.5	110	73	149	112	2.9	1.3	27.6	32.2	86	17	3.5	85	1
2.1	7.5	16	24	7.4	100	282	4.1	136	40.6	13.2	0.8	27	2	2	13.2	33.2	1.2	0.99	1.815	12.21	16.5	0	0	115	202	459	88	2.8	3.6	21.1	32.6	65	13.5	6.27	68	0
2.1	7.38	10	19	8	120	127	3.2	146	22.4	7.3	1.3	55	2.4	2.2	19	34.1	1.8	1.4196	1.1999	14.1622	16.9	0.3	0.4	116	45	93	83	2.2	2.7	28.9	32.7	88	19.6	2.53	61	1
2.1	7.39	12	30	6.3	117	87	5.3	154	35.1	10.7	0.8	26	1.5	3	14.6	32.8	1.3	1.4307	0.5773	22.9916	25.1	0.2	0.1	309	14	115	68	2.9	1.2	29.4	30.5	96	16.8	3.65	57	0
2.1	7.31	20	21	9	96	92	4.9	132	37.8	12.4	5.8	44	1.8	5.2	31.3	77.1	3.2	4.0124	5.1588	37.8312	57.32	0	1	493	16	364	67	2.9	1.5	27	32.9	82	17	4.61	71	0
2.1	7.41	9	29	8	112	111	3.9	146	32.8	10.3	1	13	1.8	4.1	14.4	38.6	1.3	1.06	0.4876	19.5888	21.2	0.1	0.2	199	30	55	61	2.9	0.4	23.6	31.2	76	13.7	4.34	84	1
2.1	7.34	19	24	9.8	90	153	4.9	128	23.6	7.4	0.9	17	1.6	3.4	15	23.8	1.4	0.7923	0.5699	12.4961	13.9	0.1	0.2	714	13	153	59	2.8	0.5	23.8	31.5	75	18.3	3.13	78	0
2.1	7.34	9	32	9	108	106	3.4	146	32.1	10.6	0.6	33	2.1	2	15	31.6	1.3	0.5625	0.657	3.2265	4.5	0.5	0.8	171	44	1907	58	2.6	5.2	34.2	33	104	19.3	3.1	61	0
2.1	7.42	18	18	8.7	105	233	4.6	136	36.1	12.6	6	93	2	5.5	13	26.7	1.1	1.47	0.525	8.19	10.5	0	3	182	45	89	50	2.9	0.3	30.8	34.9	88	15.6	4.1	59	0
2.1	7.38	12	20	7.9	103	105	3.4	132	22.2	7.3	0.9	15	2.1	1.6	12.7	36.3	1.2	1.178	0.912	1.406	3.8	1	1	24	18	131	43	2.9	1.8	31.1	32.7	95	19	2.34	27	1
2.1	7.42	15	26	9.1	105	245	4	142	30.7	9.6	2.7	81	2.6	4.2	23.6	41.7	2.4	0.408	0.272	12.784	13.6	0	0	25	54	346	43	2.9	4.1	32	31.3	103	23.6	3	69	1
2.1	7.43	23	19	8.8	101	191	6.1	137	47.6	15.7	1.7	25	2.2	4.3	13.8	31.4	1.2	0.4832	0.6191	13.892	15.1	0.4	0.2	191	14	92	41	3	1.1	31.4	32.9	96	13.4	4.98	78	0
2.1	7.45	14	23	7.5	110	131	4.5	142	28.7	9.7	0.7	18	1.7	3.5	14.7	29	1.5	0.252	0.378	11.718	12.6	0	1	106	35	43	41	3.4	2.7	29.6	33.7	88	14.9	3.27	82	1
2.1	7.36	17	24	10.7	100	124	7	134	37.2	12.4	1.3	39	2.3	3.6	12.1	23.7	1	4.324	1.316	12.596	18.8	0	2	328	44	107	39	2.9	0.1	31.2	33.3	94	14.9	3.97	66	0
2.1	7.34	14	18	8	112	126	2.9	141	26.7	8.7	1.6	35	1.4	2.2	20.7	29.5	2	1.1988	1.332	19.5582	22.2	0.1	0.5	129	40	143	39	2.6	0.3	30.1	32.6	92	18.2	2.9	59	0
2.1	7.24	17	25	8.3	93	118	4.9	130	25.2	8.8	3.4	62	1.9	3.8	15	39.9	1.5	1.8212	0.4756	9.2452	11.6	0.1	0.4	334	39	117	38	2.6	0.7	30.3	34.9	87	15.4	2.89	74	0
2.1	7.38	14	24	8.7	101	112	4.6	134	32.9	10.2	1	24	2.8	4.3	11.7	30.1	1	3.9591	1.3833	10.3827	15.9	0.4	0.6	568	33	115	37	2.8	0.6	27.1	31	87	21.5	3.76	80	0
2.1	7.13	22	17	8.2	105	51	5.8	138	26.1	8.6	3.7	75	1.1	7.8	15.2	29.8	1.6	3.9162	0.366	7.625	12.2	0.4	1.9	269	41	267	36	3.3	0.3	30.1	33	91	16	2.85	70	0
2.1	7.19	17	29	7.5	103	156	5.4	144	43.4	13.5	1.8	50	2.2	5.1	97	35.8	12	1.166	0.3816	8.9676	10.6	0.7	0.2	159	21	62	35	4.5	0.6	30	31.1	96	15.3	4.5	86	1
2.1	7.34	17	21	8.4	99	207	4.8	132	30.6	10.2	1.2	24	2.3	2.9	11.8	27.3	1	1.0205	0.2795	4.927	6.5	0.4	3.8	26	14	49	34	2.9	0.4	30.9	33.2	93	14.1	3.3	79	0
2.1	7.38	15	27	8.3	98	260	4.2	136	23.7	8.1	1.4	24	1.7	4	17.9	35.4	2.2	0.196	0.14	0.224	0.7	0	0	390	15	76	32	2.9	0.4	25.3	34.3	74	20.2	3.21	80	1
2.1	7.32	18	24	10.1	98	119	5.2	135	41.8	14.2	0.8	17	2.1	3.9	13.1	28.2	1.1	2.244	0.4664	5.9136	8.8	0.7	1.3	253	19	125	31	3.9	0.7	28.2	34.1	83	14.2	5.05	70	0
2.1	7.43	11	27	8.3	103	197	4.1	137	35.4	11.6	0.9	20	2	3.6	20.9	35.9	2	1.3104	0.9198	10.2186	12.6	0.6	0.6	208	23	153	31	2.9	7.6	34.9	32.7	107	15.7	3.32	70	0
2.1	7.34	14	29	8.7	96	128	4.2	135	38.9	13.9	1.7	26	1.8	2.1	14.4	28.3	1.2	0.801	0.623	7.476	8.9	0	0	247	20	135	30	2.8	0.8	29.8	35.7	84	15.7	4.66	76	0
2.1	7.38	15	25	7.6	99	109	3.7	135	27.1	9	1.2	31	1.9	3.1	13.6	38.4	1.2	0.8988	0.5457	9.0308	10.7	0.3	1.7	156	28	174	30	2.7	0.8	28.9	33.2	87	16.7	3.11	59	0
2.1	7.41	15	31	7.1	89	141	3.8	131	36.4	12.2	0.6	25	1.7	4.5	12.9	28.5	1.1	0.256	0.64	10.368	12.8	0	0	300	25	97	29	2.7	1.5	31.5	33.7	93	15.5	3.89	72	1
2.1	7.32	15	19	7.4	113	72	4.9	142	25	8.4	1	37	1.6	2.9	14.4	25.2	1.3	0.288	0.432	3.696	4.8	0	2	98	27	88	28	3.1	0.6	32.6	33.5	97	14.1	2.57	63	0
2.1	7.34	15	20	8.2	105	223	4.4	136	28.8	9.7	1.3	56	1.8	4	14.2	36.2	1.3	1.4	0.5425	15.3125	17.5	0.4	1	216	30	66	27	1.9	0.2	30.4	33.6	90	17.1	3.19	81	0
2.1	7.39	11	18	7.2	117	111	4.3	142	32.3	10.4	1.9	52	2	3.8	15.3	37.4	1.4	0.615	1.107	10.578	12.3	0	0	86	25	239	26	1.4	0.6	30.7	32.2	95	20.3	3.4	77	1
2.1	7.26	15	24	6.9	94	86	3.8	129	28.5	9.8	0.9	21	1.5	3.2	12.5	28	1	0.8132	0.642	19.8164	21.4	0.3	0.3	271	15	108	25	2.1	0.2	32.6	34.3	95	14.1	3	52	0
2.1	7.34	20	25	9.4	98	171	2.5	140	40.1	13.6	0.6	24	2.1	4.4	14.8	26.3	1.3	0.9222	0.7656	15.6426	17.4	0.4	0.1	367	20	57	25	4.4	0.6	30.6	33.8	91	17.6	4.42	49	0
2.1	7.49	15	45	9	74	336	2.4	132	35.6	11.6	1	14	2	2.4	12.4	21.7	1	0.7375	0.3875	11.3125	12.5	0.3	0.2	240	33	131	24	3.9	0.6	26	32.5	80	19.8	4.45	52	0
2.1	7.34	13	25.3	8.8	118	177	4	152	40.5	13.1	1.5	38	1.9	2	17.6	27.1	1.6	1.9344	0.4576	7.9248	10.4	0.4	0.4	183	36	152	24	3.3	0.9	28.9	32.4	89	15.1	4.54	84	1
2.1	7.47	14	29	8.8	101	148	4.5	139	30.4	9.3	0.6	16	2	2.6	12.5	28.6	1.1	3.0552	0.5624	11.2936	15.2	0.3	1.7	557	14	75	23	2.7	0.1	28.6	30.5	94	15	3.25	82	0
2.1	7.48	19	22	10.5	108	211	5	144	37	12.8	2.1	91	2	2	14	28	1.2	1.458	0	20.412	24.3	0	0	220	19	129	23	2.9	0.4	30	34.5	87	18.6	4.25	71	0
2.1	7.37	17	23	8.3	89	95	4	125	42	14	1.9	24	1.9	3.9	14.1	30.9	1.2	0.624	0.208	15.6	20.8	0	0	409	5	82	22	2.9	0.8	31.7	33.3	95	15.2	4.41	70	0
2.1	7.34	15	25	9.4	98	91	3.3	135	34.5	11.7	0.8	16	2	2.7	12.4	33	1	1.96	1.232	24.668	28	0.1	0.4	270	16	119	22	3.8	0.3	25.6	33.9	76	15.3	4.57	35	0
2.1	7.54	18	19	7.6	102	518	5.1	134	24.5	7.6	2.7	86	1.3	2.4	22.3	35.5	2.1	2.14	0	16.692	21.4	0	0	89	16	68	22	3.4	1.6	25.3	30.8	82	22.9	2.98	60	0
2.1	7.33	19	28	7.9	93	207	5.9	134	42	13.5	6.6	54	1.4	5.2	13.5	27.9	1.2	1.23	0.7216	14.4156	16.4	0.1	0.1	208	22	230	21	3.4	0.5	32.1	32	100	14	4.19	69	0
2.1	7.47	14	27	8	94	106	4.3	131	36.6	12.6	1.4	46	2.1	2.5	13.2	25.7	1.4	1.1875	0.3515	7.885	9.5	0.4	0.5	99	37	65	21	2.5	0.4	33.5	34.5	97	14.1	3.77	69	0
2.1	7.46	19	21	9.3	98	102	4	134	30	10	2.8	125	2.7	3.1	14.3	31.5	1.4	1.0578	0.4674	10.7379	12.3	0.1	0.2	68	9	136	20	2.9	2.4	31.1	33.3	93	19.1	3.21	79	1
2.1	7.27	28	21	9.6	93	61	7.3	135	40.5	13.4	8.8	43	2.3	5.7	17.9	35.6	1.7	1.2093	0.8062	11.8428	13.9	0.2	0.1	228	9	167	19	3.7	2.6	27.6	33	84	17.1	4.83	48	1
2.1	7.34	11	22	7	106	313	4	135	28.4	9.4	1.9	32	1.7	2	15.9	34.4	1.5	0.4223	0.205	3.4604	4.1	0.2	0.1	95	19	87	17	2.5	0.5	27.4	33	83	15	3.42	62	0
2.1	7.33	13	27	8.4	104	99	4.1	140	28.6	9.1	0.9	26	1.6	3.7	14.7	34.5	1.4	1.995	1.05	14.315	17.5	0.2	0.6	292	6	217	16	3	1	29.9	31.8	94	13.7	3.04	69	0
2.1	7.38	15	30	7.8	107	217	2.9	149	29.2	8.9	4.5	22	1.7	2.8	13.2	38.8	1.1	2.2116	0.5626	16.4706	19.4	0.4	0.4	397	12	88	13	2.7	0.3	28.8	30.4	95	20	3.08	43	0
2.1	7.29	20	22	10.1	102	105	4.7	139	24.6	8.1	6.2	61	2.4	4.9	13.1	22.6	1.1	3.675	2.058	8.232	14.7	1	2	341	7	74	10	2.8	0.3	33.8	33	102	21.2	2.4	66	0
2.1	7.34	16	24	8.6	104	101	4.7	139	28.1	8.7	1.1	15	1.6	2.3	26.6	38.4	2.7	2.162	0.94	6.11	9.4	0	2	185	5	89	10	2.8	0.2	24.8	31.1	80	17	3.52	68	0
2.1	7.35	23	16	7.1	111	76	5.5	144	32.9	9.4	4.3	73	2.3	8	14.1	29.1	1.4	0.5934	0.2666	7.6798	8.6	0.3	0.3	341	1	431	6	2.2	1.3	23.3	28.7	81	21	4.05	58	0
2	7.39	15	30	9.2	88	318	4.4	129	25.6	7.5	1	82	2.2	2.2	36.7	37.2	3.7	1.5096	0.7242	7.8438	10.2	0.2	0.9	363	1164	233	1733	3.5	1.3	21	29.4	72	17.4	3.58	73	0
2	7.44	18	18	8.3	109	93	4	141	32.2	8.3	0.4	15	2.2	2.9	18.8	30.7	1.7	0.126	0.07	0.798	1.4	0	0	52	286	524	1251	2.9	1.1	25.5	31.1	82	19.9	3.26	43	0
2	7.34	17	28	9.9	94	140	4.6	134	40.5	14.6	1.9	25	2.4	4.1	19.3	29.5	1.8	2.976	0.744	5.394	9.3	0	2	149	272	188	485	4.1	3.8	29.5	36	82	17.1	4.95	61	0
2	7.34	17	22	6.9	103	102	2.7	139	37.5	13.6	0.7	11	1.3	1.8	15.4	33.1	1.3	0.27	0	1.206	1.8	0	0	183	156	46	167	3	0.7	31.7	36.2	88	12.9	4.29	43	0
2	7.35	16	28	8.2	97	104	5	136	47.3	14.7	0.6	7	1.9	3.2	108.2	108.6	11.1	1.164	0.4462	7.7697	9.7	1.3	2	163	82	275	127	2.9	2.7	31.2	31.1	100	18.4	4.72	56	0
2	7.34	16	34	9.4	95	103	4.3	141	31.7	10.5	6.8	35	2.2	4.7	13.2	34.3	1.2	1.0508	0.518	13.0832	14.8	0.4	0.7	291	68	269	112	4.6	0.5	23	33	70	19.6	4.55	41	0
2	7.46	12	29	7	104	155	3.8	141	22.6	7.3	0.8	37	1.5	3.1	12.4	23.5	1	2.1538	0.4272	15.0766	17.8	0.6	0.3	707	73	149	112	2.1	1.3	27.6	32.3	85	17.1	2.64	38	0
2	7.39	17	21	8.8	106	141	3.9	140	37.9	13.1	1.2	20	1.6	3.8	12.7	25.9	1.1	0.38	0.095	6.365	9.5	0	0	145	73	51	112	2.9	1.3	30	34.5	87	14.8	4.36	80	0
2	7.31	17	26	10	114	361	5.5	151	44.6	13.9	1.3	70	2.9	3.7	16.4	23.1	1.5	1.8358	0.959	24.4956	27.4	0.2	0.1	246	178	80	92	4.1	0.5	22.3	31.1	72	16.4	6.22	64	0
2	7.5	16	24	9.6	106	117	4.6	141	42.8	13.9	0.8	23	2.5	3.9	12.9	28.5	1.2	1.8802	0.7426	13.0824	15.8	0.5	0.2	556	116	59	90	2.9	0.5	32.5	32.6	100	14	4.29	52	0
2	7.53	18	30	9.1	97	230	4.7	140	25.3	8.3	7.4	45	2.6	3.3	15.4	143.9	1.4	0.7752	0.6726	9.9066	11.4	0.2	0.2	168	31	87	79	4.3	0.4	31.3	33	95	16.4	2.67	70	0
2	7.34	14	29	6.5	95	163	3.9	134	38.1	13.2	1.3	26	1.7	2.7	14.5	34.5	1.3	0.553	0.237	5.925	7.9	0	0	121	76	40	78	3	1	29.3	34.5	85	14.2	4.49	73	0
2	7.34	19	18	7.7	100	94	3.6	133	29.9	9.9	2.1	48	2.3	3.9	15.1	49	1.3	0.385	0.22	4.84	5.5	0	0	88	87	471	76	2.4	1.4	28.3	33.2	85	17	3.51	68	0
2	7.34	19	27	8.1	90	109	4	132	20.6	5.6	3.8	79	1.4	3.4	62.2	61.9	24.4	1.215	0.81	25.515	40.5	0	0	385	27	174	73	2.4	1.6	20.8	27.5	76	16.9	2.72	60	0
2	7.32	15	20	7.2	109	129	3.3	141	32.5	11	1.8	44	1.6	1.9	13.9	30.8	1.2	0.636	0.954	13.197	15.9	0	0	86	56	116	73	3	1.5	31.1	33.9	92	15.2	3.55	85	0
2	7.37	12	18	5.7	117	111	3.8	143	32.4	11	0.5	13	2.8	1.5	16.6	37.8	1.8	0	0.31	11.78	15.5	0	0	133	56	51	71	2.3	1.4	29.4	33.8	87	12.7	3.73	32	0
2	7.21	18	19	8.4	102	139	4.4	135	34.8	11.7	2.8	50	1.4	1.9	14.8	31.7	1.4	1.4465	0.2585	3.7675	5.5	0.4	0.1	149	126	83	61	3.6	0.4	32	33.7	95	15	3.67	40	0
2	7.41	15	28	10.2	96	178	5.3	134	45.2	13.1	5.7	49	2.1	5.4	14.6	28.7	1.4	1.02	0.4335	6.7405	8.5	0.5	3.2	411	63	623	56	2.8	0.3	26.6	29	92	19.7	4.92	39	0
2	7.47	14	25	8.4	106	102	3.8	141	36	12	0.6	7	1.8	3.6	13.9	33.7	1.4	0.594	0.2376	4.212	5.4	0.23	0.96	109	17	219	54	2.8	1.5	28	33.4	84	14.4	4.29	62	0
2	7.41	19	24	8.6	102	146	4	141	37.4	12.3	2	30	1.9	2.5	33	30.5	3.3	0.7308	0.2871	7.6299	8.7	0.3	0.2	232	35	186	52	4.2	2.3	30.1	32.9	92	16.1	4.09	81	0
2	7.34	13	25	8.1	102	99	3.7	136	40.4	14	1.8	28	1.2	2.4	13.6	25.8	1.2	0.111	0.111	8.103	11.1	1	0	94	51	53	48	2.8	2	30.3	34.6	87	14.4	4.62	52	0
2	7.37	21	22	9.2	104	133	5.9	141	38.3	12.7	1.6	34	2.2	4.2	28.9	26.3	2.9	0.6594	0.1302	3.3516	4.2	0.3	1.1	79	20	71	48	4.7	0.8	31	33.1	94	14.4	4.09	83	0
2	7.46	13	32	10.2	98	115	4.1	139	35.8	12	1.1	11	2.3	3.5	13.6	150	1.3	1.3838	0.481	5.2096	7.4	1.7	2.8	235	22	53	47	2.9	0.4	31.5	33.6	94	14.3	3.82	88	0
2	7.48	21	23	9.2	95	247	4.6	134	33.8	11.8	1.5	44	1.9	5.6	23.3	38	3.9	0.43	0.86	18.92	21.5	0	2	382	49	102	46	3.4	0.5	29.6	34.8	85	15.8	3.99	71	0
2	7.43	18	21	7.6	90	99	4	125	35.5	12.9	1	18	1.5	3.7	14.1	26.6	1.2	0.8494	0.5206	12.2204	13.7	0.1	0.7	570	39	215	45	2.6	1.1	33.7	36.2	93	12.8	3.81	68	0
2	7.37	15	31	9.8	101	95	4	143	42.2	14.7	1.2	13	1.4	2.1	16.4	35.8	1.5	0.102	0.3876	9.6798	10.2	0.2	0.2	245	42	53	43	3.8	0.5	33.9	34.7	98	14.7	4.33	67	0
2	7.47	12	29	7.1	103	85	4.4	140	20.9	7	0.8	37	2	4.6	21.6	31.4	2.1	1.5972	0.605	21.9494	24.2	0.3	0	391	22	89	43	2.3	0.5	32.4	33.2	97	24.6	2.15	83	0
2	7.42	12	25	8.2	106	244	4.3	139	26.5	9.1	0.9	57	1.7	3.2	14.8	24.6	1.3	0.048	0.128	0.024	0.2	0	0	87	67	218	41	2.7	3	33	34.2	96	19.5	2.75	77	0
2	7.25	18	21	7.5	105	135	4.6	139	28.9	9.4	2.6	63	2.1	2.8	38.5	100	4.2	1.105	0.442	18.343	22.1	1	3	104	46	68	40	2.3	1.1	29.7	32.4	92	16	3.15	82	0
2	7.4	10	24	6.6	108	98	4.2	138	31.1	11.2	1	17	1.9	2.2	13.2	33.7	1.2	0.902	0.574	2.542	4.1	0	1	144	45	55	37	2.3	0.7	41.2	35.9	115	15.7	2.71	77	0
2	7.3	14	30	9.1	98	209	5.1	137	27.7	8.6	2.3	76	2.5	4.9	35.7	120.3	3.6	0.8208	0.162	4.3254	5.4	0.2	1.7	130	25	60	36	2.9	0.3	27.5	31.1	88	15.6	3.14	64	1
2	7.48	15	25	8.5	99	152	4.4	135	35.3	11.9	1.1	28	2	3.1	24.2	33.2	2.3	0.9585	0.355	5.5948	7.1	0.5	2.3	166	27	139	36	4.1	0.6	32	33.7	95	14.4	3.71	72	0
2	7.49	16	26	7.2	123	151	3.5	161	22.4	7.2	2.3	83	1.4	3.5	16.8	27.8	1.6	0.86	0.215	20.339	21.5	0.3	0	434	40	190	36	2.5	0.6	31.6	32.1	99	26.2	2.27	64	1
2	7.38	21	28	9.1	99	104	5.3	143	40.3	12.2	6.8	41	1.9	4.2	13.3	32.7	1.1	0.798	0.2812	6.384	7.6	0.4	1.6	314	39	125	35	2.9	0.5	25	30.2	83	17.5	4.87	60	0
2	7.32	30	16	6.2	77	517	2.9	120	37.8	13.6	6.5	111	2.1	8.2	13.8	24.9	1.3	0.965	0.6369	17.6402	19.3	0.2	0.1	182	29	125	34	2.2	0.8	29.9	36	83	12.7	4.56	55	0
2	7.4	22	24	7.4	104	343	7.3	143	36.7	11.1	2.6	111	2.3	5.6	37.3	44.9	3.4	2.6316	1.3416	21.5946	25.8	0.4	0.6	312	18	78	33	3.7	0.5	21	30.2	70	17.6	5.28	66	0
2	7.4	22	26	9	86	412	5.6	128	31.1	10.5	0.9	12	1.2	2.6	11.4	20.1	0.9	0	0.232	22.04	23.2	0	0	573	11	140	32	2.9	0.4	28.3	33.8	84	15.7	3.71	44	0
2	7.34	14	29	9.8	100	192	3.4	140	31.8	10.1	3.1	28	2.1	1.7	19.6	30.7	1.8	1.1016	0.3672	12.0632	13.6	0.2	0.2	162	19	119	31	2.6	3.9	30.5	31.6	97	18	3.3	66	1
2	7.39	17	20	8.1	101	90	3.9	134	36.8	13	1.4	25	1.5	4.6	13.6	30.9	1.2	0.204	0.408	6.732	10.2	0	0	59	37	87	31	2.4	3.5	30.4	35.4	86	15	4.29	48	0
2	7.25	20	18	7.9	102	52	5	135	32.6	10.2	2.7	71	1.6	7.6	23.2	47.3	3.7	0.489	2.934	6.52	16.3	0	0	171	28	77	30	2.6	0.4	29.2	31.2	93	17.2	3.49	70	0
2	7.36	17	20	8	101	152	4.1	134	32.2	11.4	1.4	45	1.9	4	14.7	35.6	1.3	0.6216	0.2812	13.7936	14.8	0.1	0.7	168	34	68	29	2.6	0.4	29.2	35.3	83	15.4	3.89	70	0
2	7.37	16	23	8.3	105	132	4.1	140	38.9	12.9	2	41	1.5	3.2	11.7	30.6	0.9	0.396	0.1584	2.808	3.6	0.23	0.96	147	7	119	29	2.1	1.3	28.9	33.2	87	14.9	4.46	56	0
2	7.38	9	22	8.6	113	79	2.7	141	22.2	6.8	0.7	15	2	3.9	49.4	76.8	5.4	0.924	0.252	2.604	4	0.4	5	196	17	59	29	2	0.3	26.3	30.6	86	22.6	2.58	68	0
2	7.32	14	17	6	116	89	3.2	144	22.2	7.5	1.1	33	1.2	1.5	17.9	150	1.7	0.09	0.01	0.08	0.2	0	0	64	11	132	29	1.9	0.8	30.1	33.9	89	14.5	2.5	71	1
2	7.33	21	20	8.7	135	102	4.6	171	38.7	12	4.3	105	2.9	4.5	15.4	23.9	1.6	1.2402	0.477	14.0556	15.9	0.5	0.3	580	11	325	29	2.7	0.4	30.3	31.1	98	18.3	3.97	49	0
2	7.3	21	26	7.8	100	173	4.1	143	38	13	1.7	92	1.6	2.7	13.5	21.1	1.2	0.99	0.6325	25.8225	27.5	0.1	0	456	36	111	28	2.9	1.2	33	34.2	97	13.3	3.93	64	0
2	7.38	15	23	8.1	103	100	3.3	138	34.6	11.7	0.9	18	2.1	2.8	13.7	36.8	1.2	0.808	0.8383	8.2113	10.1	0.3	2.1	297	16	100	28	2.9	0.2	28.2	33.8	84	14.7	4.14	70	0
2	7.3	13	25	7.9	107	102	3.4	142	36.2	12.8	0.5	14	1.9	3.3	14.3	30.5	1.3	0.612	1.938	2.448	5.1	1	0	169	11	76	28	3.5	0.7	31.2	35.4	88	16.3	4.1	81	0
2	7.29	16	16	8.4	135	133	4.3	163	13.3	3.6	1.1	62	2.6	5.5	24.3	53.3	2.3	0.552	0.138	3.726	4.6	0	0	17	20	104	28	2.1	0.6	20	27.2	74	22	1.81	64	0
2	7.33	15	20	7.7	94	122	4.1	125	37.2	12.9	0.8	9	1.3	2.4	17.8	33.8	1.8	0.186	0.372	17.484	18.6	0	0	257	19	49	27	2.9	0.6	32.4	34.7	93	13.4	3.99	64	1
2	7.33	20	20	7.5	96	285	4.7	131	35.8	12.1	1.2	29	1.9	2	13.9	21.5	1.2	0.285	0.285	8.93	9.5	0	0	320	20	86	27	3.1	1.2	30.4	33.9	90	13	3.99	87	0
2	7.39	18	23	8.5	99	120	4.7	135	33.7	11.4	1.6	28	1.5	3.3	15.3	27.5	1.4	0.8016	0.835	15.0133	16.7	0.1	0.1	224	22	81	27	3.1	2.5	29.6	33.8	88	14.7	3.85	69	0
2	7.47	13	30	10.9	100	110	4	139	36.1	12.1	0.7	14	2.2	4.7	12.8	19.8	1.1	0.5616	0.1716	14.82	15.6	0.1	0.3	232	67	75	27	2.9	0.8	30.1	33.6	90	13.8	4.03	54	0
2	7.48	13	28	8.3	96	99	4	133	32.6	10.9	1	34	2.3	3.2	12.9	23.8	1.1	5.4384	1.1742	13.8844	20.6	0.3	0.3	279	13	62	26	2.9	0.6	31.1	33.4	93	15.1	3.5	64	0
2	7.39	20	28	8.9	99	253	4.6	142	33.9	10.2	5.1	40	2.3	7.3	29.8	43.4	3	0.518	0.504	12.796	14	0.2	1	261	38	178	26	3	0.8	29.2	30.1	97	21.4	3.5	71	1
2	7.44	14	28	7.9	101	105	4.1	139	32.7	11.8	1.4	22	1.8	3.4	14.8	28	1.3	0.88	0.352	6.24	8	0.23	0.96	296	24	110	26	4.1	0.3	29.4	36	82	13.8	4.01	73	0
2	7.36	13	25	8.3	105	126	3.8	139	41.6	13.1	1.2	24	1.9	3.5	14.1	35.2	1.3	1.3416	0.6708	13.494	15.6	0.4	0.3	231	13	88	26	2.2	0.5	29.1	31.5	92	14.6	4.51	64	0
2	7.2	19	31	8.2	87	146	8.3	129	30.3	10.5	3.6	106	3.7	6.7	11.7	23.6	1	1.4	0.6	16.6	20	0	0	352	17	65	25	3.1	0.4	31.6	34.5	92	14.7	3.31	64	0
2	7.39	18	18	8	95	250	4.3	127	31.9	11.2	1.8	78	2	3.7	150	73.5	5.5	0.7872	0.2706	11.193	12.3	0.2	0.2	193	32	267	25	3.2	3.1	28.6	35.2	81	15.8	3.92	67	0
2	7.22	30	12	9.1	98	213	6	134	43	14.5	4.9	83	2	6.6	12.9	28.7	1.1	0.8673	0.0637	3.8955	4.9	1	0.4	205	9	149	25	3.6	0.4	27.9	33.8	83	17.3	5.2	51	0
2	7.31	18	22	7.4	102	215	4	138	43.5	14.8	1.5	32	1.8	2.6	13.5	29.6	1.2	0.543	1.086	13.394	18.1	1	1	184	25	74	25	2.8	0.7	30	34.1	88	20.5	4.95	83	0
2	7.38	12	33	9.3	102	179	4.4	143	31.1	9.5	0.4	15	1.7	3.8	12.2	24.7	1	0.7502	0.465	4.7926	6.2	0.4	2.6	230	28	154	25	3.5	0.1	27	30.6	89	16.9	3.52	41	0
2	7.41	23	26	8	95	111	3.4	141	34.1	10.7	3.5	46	1.7	4	12.3	22.1	1	1.131	0.5265	17.6865	19.5	0.3	0.5	880	21	104	24	2.9	0.4	26.8	31.5	85	19.1	4	61	0
2	7.34	12	28	8.1	98	174	4.3	134	32.1	10.1	1.7	38	2.1	3.9	17.6	30.5	1.6	1.001	0.4004	7.4074	9.1	0.5	2.7	163	20	102	24	3.3	0.7	27.8	31.5	88	16.2	3.63	63	0
2	7.04	13	35	9	100	132	4.4	144	33.4	11.1	3.1	17	2.2	3.6	31.3	39.6	3.3	0.9724	0.408	5.3176	6.8	0.3	1.2	154	14	128	24	3.7	0.5	36.8	33.2	111	17	3.02	64	1
2	7.41	17	22	7.9	103	230	4	138	36.3	11.9	2.2	42	1.7	2.2	12.8	27.4	1.1	0.962	0.962	3.182	7.4	0	0	102	25	55	24	3.1	0.5	25.1	32.7	77	25.6	4.75	59	0
2	7.34	15	33	9.1	92	53	5.4	135	32.5	10.8	2.6	98	3	5	27.7	60.2	5.1	0.8686	0.4386	6.9144	8.6	0.4	4.1	279	15	98	23	3.9	0.4	29.7	33.2	89	14.7	3.63	70	0
2	7.31	19	21	8.3	93	185	6	127	35.7	11.8	2.8	41	1.5	4.9	64.8	67.9	6.5	3.8164	0.658	14.006	18.8	1.1	0.6	407	25	210	22	3.4	0.2	28.1	33	85	18	4.19	50	1
2	7.41	18	24	7.4	95	106	5.2	132	31.9	10.8	2.4	65	1.8	4.2	48.1	39.4	5.2	0.5724	0.1134	4.6764	5.4	0.2	0.5	399	15	58	22	2.8	0.4	28.7	33.8	85	17.2	3.76	86	0
2	7.35	16	32	8.6	95	115	4.9	138	39.7	13	1.3	18	1.7	2.4	18.5	37.3	2.3	2.4928	1.066	12.7428	16.4	0.3	0.3	396	12	47	20	3.7	0.3	29.5	32.7	90	13.7	4.41	47	0
2	7.34	19	20	8.8	103	99	4.2	138	22.2	7.5	1.6	61	2.5	3.7	15.6	31.4	1.4	0.6335	0.4163	16.9959	18.1	0.1	0.1	349	21	155	20	2.6	0.4	29.2	33.5	87	16.3	2.55	61	0
2	7.34	11	25	7.1	109	168	3.8	141	31.2	10.2	1.1	12	1.4	1.8	15.1	28.4	1.4	0.779	0.3116	7.0602	8.2	0.1	0.5	93	17	65	20	3.2	0.4	29.8	32.5	92	15.5	3.41	56	0
2	7.33	24	24	8.2	95	120	4.2	139	36.8	12	6.3	25	1.5	1.4	13.5	28.4	1.2	0.8556	0.3069	8.0445	9.3	0.1	1	136	7	154	18	3.6	0.1	31.5	32.6	97	18.4	3.81	40	0
2	7.35	16	31	8.4	94	94	4.1	137	35.7	11.2	2.5	10	1.5	2.9	22.2	69.7	2.2	0.6222	0.2806	11.2606	12.2	0.3	0.1	290	11	243	16	2.5	0.4	31.3	31.3	100	18.4	3.57	51	0
2	7.32	18	15	8.3	105	118	5.4	133	27.1	8.6	2.4	49	1.8	5.8	15.3	34.7	1.3	1.5549	1.0731	19.1187	21.9	0.1	0.4	392	5	117	16	2.6	0.2	29.2	31.9	92	15	2.95	83	1
2	7.38	15	19	8.5	107	156	4.6	136	29.6	9.1	1.3	31	1.8	2.4	38.9	43.7	3.8	1.33	0.399	7.201	9.5	0.4	5.6	269	23	67	16	3.3	0.4	29.3	30.8	95	14.4	3.12	76	0
2	7.47	24	25	8.7	87	87	3.1	133	40.4	13.8	3.9	94	1.8	3	64.5	55.3	8.1	1.1454	0.966	11.5782	13.8	0.1	0.6	232	5	66	15	3.3	0.5	32.2	34.2	94	14.4	4.3	85	0
2	7.29	30	22	10.4	92	152	5.8	138	32.1	9.9	8.2	52	2.4	5.6	15.4	31	1.6	1.8942	1.0318	11.8272	15.4	0.7	3.4	654	14	111	14	3.9	0.2	28.3	31	91	16.7	3.51	44	0
2	7.29	25	16	8.6	83	136	5.6	118	33.2	10.8	5.2	61	2.5	8.1	43.1	53.9	4.2	1.9635	0.5865	22.8225	25.5	0.3	0.2	562	15	159	13	3.8	0.1	27.7	32.4	85	17.6	3.89	51	0
2	7.19	16	27	8.7	105	85	5.4	143	39.1	11.5	2.9	45	2.2	6.3	40.5	37.8	4.3	1.593	0.531	3.481	5.9	0	2	248	14	62	12	2.9	0.1	27.8	29.3	95	15.7	4.12	63	0
2	7.34	13	29	8.5	97	107	3.9	135	22.4	7.7	0.4	26	1.7	2.8	16	27.8	1.5	0.5061	0.0777	1.4679	2.1	1	1.3	45	11	597	10	1.7	0.5	27.4	34.2	80	16.4	2.8	60	0
2	7.09	16	21	8.4	113	107	4.9	145	31.1	9.6	2.7	59	2.1	5.3	14.4	29.5	1.2	0.297	0.216	12.9735	13.5	0	0.1	201	5	31	10	2.7	0.3	32.2	30.9	104	16.8	2.98	76	1
2	7.34	13	18	7	119	129	4.5	145	29.9	10.2	1	15	1.5	4	13.2	24.7	1.2	0.118	0.236	8.024	11.8	0	0	243	15	77	9	3.3	0.1	35.4	34	104	14	2.88	40	0
1.9	7.18	18	27	9.7	97	101	5	137	37.8	12.3	1.2	29	1.8	5	24.5	26	2.3	0.88	1.936	14.784	17.6	0	0	380	304	356	438	4.4	1.2	32	32.5	98	17.9	3.84	64	0
1.9	7.37	13	26	9.2	94	114	4.9	128	28.9	10.1	1.2	37	2	3.4	16.9	31.6	1.5	2.424	0.5454	6.5347	10.1	0.6	5.2	135	122	226	225	2.5	8.8	38.5	34.8	111	15.9	2.62	75	0
1.9	7.27	16	26	10	103	92	3.9	141	36.9	12	1.2	47	2.3	2.2	11.5	22.9	1	0.406	0.087	1.508	2.9	1	0	231	58	57	164	2.7	0.5	31.1	32.6	95	16.6	3.87	78	0
1.9	7.18	21	18	8.9	99	104	5.7	132	32.2	9.4	2.5	73	2.3	2.7	16.1	37.7	1.4	3.084	2.056	18.761	25.7	0	1	372	46	344	140	2.5	11.7	25.6	29.1	88	21.9	3.66	49	1
1.9	7.32	12	27	6.6	94	124	4.4	129	33.3	10.9	1.2	12	1.3	3.9	43.2	39.7	4.8	0.594	0.594	16.434	19.8	0	0	339	85	305	139	2.4	0.3	28.4	32.6	87	16.1	3.82	79	1
1.9	7.47	8	29	8.6	129	85	3.3	163	23.9	7.6	1.2	62	2.3	2.1	18.3	38.6	1.7	2.5665	0.4698	5.3679	8.7	0.3	3	100	81	205	139	2.9	1.5	31.1	31.9	97	18	2.45	75	1
1.9	7.46	19	31	8.5	102	155	5.1	147	28	8.4	0.5	95	2.3	2.3	33.2	44.3	6.9	0.23	0.184	4.186	4.6	0	0	92	151	13	125	2.1	2.1	24.2	30	81	16.9	3.48	65	0
1.9	7.41	19	27	8.6	91	149	5.4	132	38.9	12.9	0.7	23	1.6	3	12.3	20.2	1	4.067	0.98	18.5465	24.5	0.7	3.1	424	73	149	112	3.7	1.3	27.6	33.1	84	16.3	4.66	63	0
1.9	7.4	13	27	8.1	98	94	4.6	133	30.9	9.8	0.7	14	1.5	3.6	13.7	27.2	1.2	1.288	0.391	9.752	11.5	0.1	0.5	201	73	149	112	3.2	1.3	28.1	32.3	87	13.3	3.5	64	0
1.9	7.35	16	13	8.9	119	188	7.4	141	24.9	8.4	3.3	71	2.4	2.7	14.9	27	1.3	1.3101	0.0891	1.7721	3.3	1.3	2.5	71	23	128	109	1.7	0.3	30.8	33.7	91	16.6	2.73	70	0
1.9	7.35	18	20	7.5	116	175	3.3	151	35.1	11	1.8	42	2.2	4.7	15.4	26.3	1.4	1.35	0.567	24.948	27	0.3	0.2	189	44	129	107	2.8	0.7	22.5	31.2	72	21.2	4.87	77	1
1.9	7.53	14	23	12.9	102	224	4.2	135	32.2	10.7	1.9	45	1.6	3.4	18.9	30.6	1.7	1.661	0.302	12.08	15.1	0	0	208	28	151	106	3.8	1.5	34.8	33.4	104	17.2	3.09	67	1
1.9	7.44	10	18	7.7	89	155	4.4	113	28.9	10	0.8	18	1.9	3.1	23.8	50.5	2.4	0.77	0.231	6.391	7.7	1	3	65	54	377	101	2.3	19.6	34.5	34.5	100	19.4	2.9	49	0
1.9	7.48	16	30	8.4	98	160	3.2	141	33.6	10.5	3.7	29	1.6	2.2	14.3	45.2	1.4	0.726	0.121	8.833	12.1	0	3	267	9	83	77	2.4	0.4	28.1	31.1	90	20.7	3.72	70	0
1.9	7.24	12	21	7.2	107	156	4.3	136	39.4	12.8	3.5	47	1.5	3.5	39.9	40.1	3.9	2.4797	0.4887	15.0411	18.1	0.4	0.2	383	60	167	77	3.3	0.2	28.4	32.6	87	14.3	4.51	53	0
1.9	7.34	15	21	8.3	101	108	3.3	134	36.1	12.3	1.4	31	1.6	2.9	14.8	34.7	1.3	0.8322	0.1596	2.7968	3.8	0.2	0.1	113	36	121	70	3.6	0.3	29.3	34.1	86	19.1	4.19	63	0
1.9	7.33	13	26	9.2	103	180	4.4	138	35.5	12	2.1	52	2.1	4.8	34.2	39.2	3.5	0.384	0.192	15.168	19.2	0	0	97	70	68	70	4	0.6	32.5	33.9	96	14.2	3.7	78	0
1.9	7.44	20	18	8.7	104	96	4	138	28.5	8.1	1.6	70	2.2	3	13.7	27.4	1.2	0	1.832	87.02	91.6	0	0	761	31	270	70	3.2	6.8	24.2	28.5	85	24	3.37	82	0
1.9	7.4	17	22	8.2	103	163	3.9	138	33.6	11.6	1.6	24	1.6	2.6	16.5	32	1.5	0.287	0	3.362	4.1	0	0	134	18	57	66	2.9	1.9	30.7	34.4	89	14.2	3.76	73	0
1.9	7.39	11	32	8.9	102	159	4.3	141	34.5	11.1	0.9	16	2	3	15.8	30.6	1.5	0.348	0.2262	5.2084	5.8	0.2	0.2	146	120	135	64	3.6	0.1	36.8	32.3	114	16.4	3.03	58	0
1.9	7.3	13	22	6.5	111	95	3.8	142	32.4	10.8	0.9	17	1.2	3.6	13.7	22.7	1.2	0.588	0.168	6.195	7	0.4	0.2	231	49	116	63	2.5	0.3	35.2	33.2	106	13.4	3.06	51	0
1.9	7.37	10	28	7.9	103	83	5.4	136	40.9	13.2	1.7	51	2.2	3.5	25.9	32.2	2.6	0	1.392	29.928	34.8	0	0	295	36	313	61	2	1.7	35.6	32.2	111	16.2	3.7	82	1
1.9	7.37	17	20	7.8	115	218	5.5	146	31.4	10.8	2.8	81	2.8	2.4	15.3	27.3	1.4	0.585	0.39	17.745	19.5	0	1	135	67	282	60	2.9	0.3	32.1	34.5	93	16.6	3.37	62	0
1.9	7.41	13	21	7.3	107	110	3.3	138	36.6	11.8	1.3	24	1.5	3.1	25.6	27.1	2.5	0.2472	0.1545	9.7335	10.3	0.3	1.3	288	26	77	59	2.9	0.4	32.5	32.3	101	17.4	3.64	81	0
1.9	7.34	15	23	7.6	100	117	4.3	134	34.8	11.7	1	11	1.5	2.3	13.4	34.5	1.1	1.58	0.79	5.451	7.9	0	0	312	21	87	57	2.9	1	31.6	33.7	94	20.8	3.71	57	0
1.9	7.38	18	24	9	97	100	3.5	135	39.1	13	1.3	22	2.4	3.9	14.2	28.8	1.3	0.4752	0.1836	4.644	5.4	0.8	0.9	268	28	84	55	2.9	0.3	27.6	33.2	83	14.5	4.7	60	0
1.9	7.4	17	24	8.5	102	158	6.1	137	31.8	10.1	1.2	21	2	3.4	12.8	24.7	1.1	2.34	0.504	8.976	12	0.2	1.3	373	27	82	54	4.1	0.3	24.6	31.8	77	15.5	4.12	77	0
1.9	7.34	14	24	7.8	102	85	4.3	136	35.6	11.9	0.8	16	1.8	2.8	13.3	28.6	1.1	1.4931	0.2079	16.7265	18.9	0.3	2.2	437	60	172	52	2.9	0.1	31.6	33.4	95	16.3	3.76	54	0
1.9	7.41	15	22	6.9	98	124	4.1	131	24	8.5	0.7	20	1.6	3.4	14.5	26.7	1.4	1.1457	0.7839	18.0699	20.1	0.3	0.2	347	41	422	50	2.1	1.1	26	35.6	73	15.5	3.29	71	1
1.9	7.35	13	31	8.7	104	104	4	144	33.2	11.1	1.3	24	1.9	3.7	12.3	25.7	1.1	0.954	0.159	13.515	15.9	0	0	225	18	51	49	3.7	1	32.3	33.5	97	14.3	3.44	79	0
1.9	7.35	15	27	7.9	107	126	4.7	144	30.7	9.2	1.1	64	2.2	3.9	20.3	41.6	1.9	1.3104	0.5964	6.4596	8.4	0.1	0.3	388	33	155	47	2.8	1.5	22.8	29.9	76	19.8	4.03	72	0
1.9	7.22	14	20	7.5	109	93	4.5	138	35.2	9.4	1.7	23	1.7	4.5	21.5	33.2	2	1.458	0.972	45.684	48.6	0	0	295	12	143	46	2.4	0.4	20.2	26.8	76	18.2	4.66	75	1
1.9	7.43	12	26	8.3	109	66	5	142	15.7	5	0.9	21	1.7	4.6	12.9	33.2	1.1	1.78	2.225	30.26	44.5	0	0	315	22	149	44	2.9	0.5	30	31.5	95	16.7	1.65	57	1
1.9	7.34	17	31	8.6	100	151	3.4	145	29.9	9.5	2.6	19	1.7	2.7	30.2	46.8	2.9	0.2401	0.2107	4.4394	4.9	0	0.2	65	20	123	43	3.1	0.6	36.3	31.7	114	19	2.61	87	1
1.9	7.35	18	23	9.1	101	92	6.6	135	35.6	11.3	1.6	23	1.8	3.7	12	18.2	0.9	0.3596	0.3813	2.2196	3.1	0.7	3.6	223	15	73	43	3.8	1.3	33.7	31.8	106	16.2	3.36	41	0
1.9	7.39	19	20	9.6	100	212	4.6	134	27.4	9.8	0.7	16	1.8	2.7	14	24.8	1.3	0.516	0.946	6.88	8.6	0	0	106	26	139	41	3.2	2.5	34.9	35.9	97	13.6	2.82	78	0
1.9	7.34	20	20	9.1	105	203	5.6	139	29	9.2	1.4	34	2.1	6	15.8	29.2	1.4	0.508	0.762	23.114	25.4	0	0	696	46	224	40	3	0.4	27.7	31.6	88	14.5	3.31	79	0
1.9	7.34	20	23	9.6	91	226	4	130	35.9	12.3	3.1	49	1.8	4.6	13.9	29.6	1.3	1.848	2.464	22.484	30.8	0	0	214	26	38	35	3.2	0.7	27.7	34.1	81	15.4	4.44	46	0
1.9	7.34	16	25	8.7	99	53	4.4	136	31.3	10.7	2	59	1.3	3.8	15	23.4	1.3	0.278	0.278	10.981	13.9	0	1	352	50	206	35	3.3	0.8	30.7	34.3	90	16.2	3.49	75	0
1.9	7.44	12	26	9.1	100	281	3.9	134	36.4	12.2	0.6	15	1.6	1.6	14.5	33	1.3	0.7668	0.5538	12.709	14.2	0.2	0.9	278	26	69	34	3.9	0.5	28.7	33.6	86	15.4	4.26	40	1
1.9	7.45	17	25	9.5	100	130	4	138	33	10.3	1.1	22	2.7	2.7	40.9	50	4	0.3978	0.6732	14.1678	15.3	0.3	0.1	216	16	57	33	3.9	1	23.5	31.1	76	15.4	4.37	87	0
1.9	7.42	12	29	8.3	104	105	4.2	141	33.4	10.8	2.2	47	1.6	2.1	16.2	34.1	1.4	0.6916	0.3458	2.7512	3.8	0.1	0.2	137	14	44	33	3	0.3	29.7	32.4	92	16.8	3.64	61	0
1.9	7.4	14	25	7.1	106	115	4.2	141	34.6	12.5	0.9	25	1.9	3.2	12.2	24.2	1	1.7184	0.5088	7.2672	9.6	0.4	0.7	227	26	174	33	2.7	1.3	32.5	36.1	90	13	3.84	84	0
1.9	7.33	17	18	7.7	107	103	4	138	34	10.8	1.3	36	0.9	2	57.4	42.4	6.5	0.24	0.6	8.4	12	0	0	148	16	58	28	3.1	0.5	27.5	31.7	87	17	3.91	82	0
1.9	7.36	15	26	8.9	103	156	3.3	141	35	11.2	1.2	20	1.3	3.9	19.3	24.9	1.8	1.7516	0.3016	9.396	11.6	0.2	1.2	287	30	91	27	2.9	0.6	27.7	31.9	87	17.7	4.03	50	0
1.9	7.38	16	27	8.3	96	133	3.6	135	32.2	10.1	5.7	27	1.8	2.1	14.3	26.8	1.2	2.1912	0.4752	3.5112	6.6	0.7	5.7	265	22	123	26	3	0.2	34.2	31.5	109	17.1	2.96	75	0
1.9	7.32	17	18	7.6	101	75	3.5	132	37.3	12.4	1.3	26	1.8	2.8	18.8	31.3	1.7	0.3132	0.2376	10.1952	10.8	0.1	0.4	205	15	85	26	2.6	0.4	29	33.3	87	15.6	4.28	79	1
1.9	7.34	14	25	6.3	102	108	3.2	138	36.2	11.8	0.9	18	1.3	2.3	14.5	51.9	1.3	0.7031	0.0474	6.9283	7.9	0.3	2.5	214	21	53	26	3	0.7	28.9	32.6	89	12.6	4.08	34	0
1.9	7.34	12	20	7.7	106	100	4.2	134	29.6	9.9	0.8	22	1.6	3.2	16.5	33.9	1.5	0.4536	0.4116	7.4256	8.4	0.3	1	66	16	74	26	2.3	1.1	33.4	33.5	100	14.7	2.97	80	0
1.9	7.34	18	19	7.2	91	93	4.8	123	28.6	9.6	1.5	19	1.4	2.1	12.6	28.9	1.1	0.756	0.294	19.908	21	0.1	0	270	15	56	25	3	0.2	28.1	33.7	84	13.4	3.42	69	0
1.9	7.34	15	26	8.3	92	121	5.9	127	41.1	13.7	0.9	36	2.4	2.7	15.7	39	1.4	1.4076	0.4692	18.4212	20.4	0.4	0.2	267	24	100	25	2.4	0.7	28.6	33.3	86	15.7	4.78	80	0
1.9	7.34	19	21	8	89	90	2.6	126	25	8.2	1.1	9	1.7	1.7	14.4	31.1	1.3	0.445	0.2848	8.1079	8.9	0.3	0.3	337	13	121	24	2.5	0.6	29.8	32.8	91	15.3	2.75	66	1
1.9	7.34	21	24	7.2	95	100	5.1	135	42.6	14.2	7.8	40	2.1	6.4	12.9	33.1	1.1	1.122	0.6375	3.2589	5.1	1.2	0.3	134	14	433	24	2.7	0.3	32.5	33.4	98	14.6	4.37	57	0
1.9	7.33	20	25	9.5	92	153	5.2	132	31	9.8	2.9	23	2	2.6	28.9	45.8	2.8	1.3275	0.675	20.385	22.5	0.3	0.1	696	17	124	22	2.5	0.4	30	31.5	95	15.5	3.26	65	0
1.9	7.32	20	25	7.1	99	134	4.3	140	42.4	14.6	1.6	35	1.5	1.8	12.7	25.5	1.1	1.394	0.082	3.034	8.2	0	0	245	10	79	22	4.2	0.6	31.6	34.4	92	13.5	4.61	71	0
1.9	7.27	14	27	10.3	105	98	4.4	142	43.7	15	0.8	11	2.1	3.9	17.8	36.3	1.8	2.9645	0.4598	8.5063	12.1	0.5	0.8	401	16	71	22	3.4	0.1	33.5	34.3	98	14	4.48	56	0
1.9	7.34	8	33	7.4	96	123	3.8	133	35.1	10.8	0.3	16	2.2	2.2	14.5	38.3	1.3	0.7809	0.4658	12.2341	13.7	0.7	0.9	548	13	90	21	1.7	0.2	29.5	30.7	96	17.6	3.65	64	0
1.9	7.34	17	27	8.6	96	340	4.4	136	37.5	12.3	1.3	28	1.6	3.3	16.3	25.5	1.5	1.3452	0.6018	14.3547	17.7	0.1	7.8	654	8	73	20	3.1	0.2	28.8	32.8	88	14.6	4.27	74	0
1.9	7.57	19	22	6.6	101	71	4	138	32.3	11.1	1.3	29	1.1	4.2	16.6	39.8	1.9	1.6289	0.4914	6.8887	9.1	0.1	0.9	512	12	149	20	1.7	0.5	29.5	34.5	86	11.9	3.78	77	0
1.9	7.34	14	29	9.3	101	192	4.4	140	49	16	2.9	28	2.4	2.6	30.5	34.3	3	0.777	0.5772	9.4461	11.1	0.3	2.5	264	24	155	20	4.2	0.3	36.5	32.7	112	14.9	4.39	55	0
1.9	7.26	16	22	8.2	104	99	2.8	139	31.9	11.4	0.6	25	1.5	3.6	14.7	36.8	1.5	0.179	1.432	14.499	17.9	0	1	237	33	149	20	2.6	1.2	32.7	35.6	92	13.6	3.47	36	0
1.9	7.36	14	23	7.9	123	95	3.7	156	25	7.9	1.9	97	2.6	4.1	17.4	35.3	1.5	0.732	1.098	16.47	18.3	0	0	307	41	92	20	2.5	0.3	30.4	31.4	97	18.5	2.58	77	1
1.9	7.4	14	24	7.6	99	120	3.3	134	33.3	10.7	1.8	16	1.4	1.8	14.2	32.7	1.4	1.521	1.183	13.52	16.9	0	0	329	14	93	19	2.4	0.5	32.1	32.3	100	15.6	3.34	64	0
1.9	7.33	14	27	9.4	100	217	6.2	135	25.2	8.7	1.8	38	1.6	4.4	13.1	26.8	1.1	1.1544	0.4212	13.416	15.6	0.4	3.5	266	20	50	18	3.5	0.5	29.6	34.6	85	17.2	2.95	47	0
1.9	7.29	17	27	7.2	102	94	4.5	141	26.6	8.3	1.3	11	1.6	3.5	13.8	26.8	1.2	0.602	0.756	12.474	14	0.4	0.9	757	13	54	18	2.8	0.2	27.3	31.1	88	13.9	3.03	58	0
1.9	7.27	14	25	8.5	106	153	3.8	141	34.5	12	0.6	21	1.6	3.8	13.3	29.9	1.2	1.4375	0.5	10.325	12.5	1.2	0.7	588	16	115	18	2.8	0.3	31.5	34.8	91	14.2	3.81	61	0
1.9	7.44	17	34	11	83	127	4.5	129	31.2	10.5	3.9	44	2.6	5.9	11.4	23.8	0.9	1.1385	0.4455	8.2467	9.9	0.3	0.3	276	13	66	17	2.9	0.3	28.1	33.7	83	20.4	3.74	51	0
1.9	7.43	17	34	9.7	91	128	4.9	137	45.4	14.9	2.6	17	2.1	2.9	13.3	32.6	1.2	1.73	1.038	14.532	17.3	0	0	301	9	79	17	2.8	0.4	32.7	32.8	100	16.2	4.56	79	0
1.9	7.43	15	24	7.7	100	139	3.4	136	25.1	9.1	0.6	9	1.2	2.7	14.2	29.8	1.4	0.77	0.462	12.936	15.4	0	0	249	19	82	17	3.3	0.6	32.9	36.3	91	17.9	2.77	71	0
1.9	7.47	15	30	8.4	101	77	4.3	142	40.4	14.4	2.2	39	1.5	4.6	16.3	36.6	1.9	1.672	0.484	8.679	11	0.4	1.2	149	17	115	17	3.4	0.5	30.2	35.5	85	13.2	4.75	68	0
1.9	7.34	17	22	9.1	104	201	3.8	139	34.6	10.7	4.7	13	1.6	2.2	14	30.3	1.3	1.2672	0.5472	5.1408	7.2	0.4	3	160	14	210	17	4.1	0.1	32	30.8	104	17.4	3.34	64	0
1.9	7.33	10	37	8.6	94	241	4	137	26.9	8.9	1.2	29	2.2	4.9	25.1	27.2	2.4	0	0.704	16.368	17.6	0	2	322	18	123	16	3.1	0.2	29.9	33.1	90	15.1	2.98	84	0
1.9	7.26	18	23	10.7	102	143	6.7	136	32.9	11.2	2.9	65	2.5	5.9	13.2	24.1	1.1	0.884	0.637	11.414	13	0.3	0.2	259	25	100	16	2.8	0.5	31.1	33.9	92	15.3	3.58	71	1
1.9	7.33	18	20	8.2	104	278	5.1	137	44.4	14.1	8.3	108	3.2	4.7	12.9	26.2	1.1	0.774	0.86	6.794	8.6	0	1	118	14	106	16	3.7	0.8	28.5	31.8	90	15.6	4.96	58	0
1.9	7.34	17	20	9.4	103	126	5.8	134	34.5	11.1	0.5	13	1.9	3.1	14.2	39.9	1.2	1.35	0.486	8.8344	10.8	0.6	0.7	177	6	53	15	2.8	0.1	27.6	32	86	15.6	4.01	51	0
1.9	7.31	26	16	6.8	107	219	6.2	143	31	9	9.7	144	2	9.6	16.6	30	1.5	0.2368	0.1776	6.9634	7.4	0	0.3	543	14	36	15	2.8	0.5	29.6	33.8	88	16.3	3.03	60	0
1.9	7.28	15	23	7.8	97	136	3.6	131	30.6	10.5	1.7	17	2	3.6	38.4	48.4	3.9	0.602	0.043	2.924	4.3	0	0	184	2	84	14	2.5	0.5	32.1	34.3	94	17.6	3.27	83	1
1.9	7.34	19	27	8.9	97	80	4.9	138	30.3	10.1	8.9	51	1	4.3	11.7	24.4	1	0.5712	0.1848	7.5852	8.4	0.1	0.6	152	22	83	14	3.2	0.9	27.2	33.2	82	15.5	3.69	77	0
1.9	7.45	14	24	8.1	102	184	4.7	135	35.8	11.3	2.3	53	2.1	2.5	15.5	29.5	1.4	1.4238	0.7684	20.001	22.6	0.4	1.4	522	9	149	14	2.6	0.2	30	31.4	95	16.3	3.76	88	0
1.9	7.42	9	31	8.6	100	171	4.2	136	30.7	10.4	1	12	2.1	3.8	51.5	41.6	5.9	0.7992	0.4218	9.768	11.1	0.3	0.7	317	13	66	13	3	0.6	29.8	33.8	88	13.1	3.48	58	0
1.9	7.39	18	25	9.3	105	101	4.6	143	35.9	11.8	0.7	15	2.1	3.4	12.7	25.7	1.1	0.8162	0.371	9.2856	10.6	0.2	1	386	32	67	13	2.9	0.3	28	32.8	85	14.1	4.2	50	0
1.9	7.34	15	19	8.5	144	256	4.1	174	38.1	11	1.7	56	2.3	2.7	57.7	35.5	6.5	1.9776	0.2575	7.7353	10.3	0.5	2.7	278	12	128	13	3.1	0.5	22	29	76	18.7	5.01	84	0
1.9	7.35	13	24	7.1	105	146	3.7	138	28.1	9.3	1.1	10	1.5	2.7	15.6	31.2	1.5	0.3825	0.1173	4.5849	5.1	0.2	0.1	265	14	141	11	2.9	0.2	28.1	33.1	85	17.1	3.31	50	0
1.9	7.02	17	5	6.9	122	166	3.5	140	31.7	8.5	5	61	1.8	5.8	13.4	60.3	1.1	0.328	0.082	7.708	8.2	0	0	175	17	153	10	1.9	0.1	30.2	26.9	112	17.3	2.82	67	0
1.9	7.49	21	24	8.3	99	386	4.7	139	38.9	11.7	5.9	31	2.1	6.7	15.7	30.8	1.4	0.481	0.182	12.259	13	0.2	0.4	273	7	145	9	2	0.2	31.2	30	104	19.8	3.74	50	0
1.9	7.37	18	20	9.7	107	671	4.9	140	42.1	14.2	3.1	53	2.4	2.8	13.9	33.4	1.2	3.162	0.93	11.532	18.6	0	0	227	6	102	9	3.3	0.3	30.2	33.7	90	11.8	4.7	49	0
1.9	7.37	15	22	8.2	109	145	5	141	29.7	9.5	2	32	2	3.8	12.7	23.7	1.1	0.5336	0.092	3.9238	4.6	0.3	0.8	260	3	131	8	3	0.3	28.4	32.2	88	19	3.36	64	0
1.9	7.32	15	22	7.7	110	110	4.3	143	31.9	10	1.1	15	1.4	4.2	13.5	20.7	1.2	0.328	0.656	13.776	16.4	0	0	562	9	42	7	3.3	0.6	24.8	31.5	79	16.1	4.04	43	0
1.9	7.34	12	32	8.3	99	168	5	138	37.6	11.8	0.7	7	1.7	4.8	47.5	49.2	5.4	0.24	0.96	22.32	24	0	0	555	7	92	6	2	0.1	27.2	31.4	87	16	4.34	33	0
1.8	7.39	16	23	8.9	110	79	7.1	141	29.2	9.5	7.2	50	2.5	4.2	15.4	40.9	1.4	1.111	0.4444	7.878	10.1	0.23	0.96	124	206	102	764	2.7	0.6	32.4	32.4	100	16.1	2.92	41	0
1.8	7.34	15	24	9.1	101	27	4.6	135	34	11.9	1.2	17	2.3	3.7	25.8	50	2.5	3.009	0.153	1.683	5.1	0	5	147	41	235	277	3.7	2.2	30.6	34.9	88	20.5	3.89	62	0
1.8	7.27	15	24	9	101	237	4.8	135	31.5	10.9	0.9	25	2	3.6	12.1	25.2	1	1.1544	0.6364	12.6392	14.8	0.2	2.3	243	227	213	240	3	0.6	29.1	34.5	84	14.1	3.73	78	0
1.8	7.41	20	22	6.9	89	93	4.5	119	33.1	11	4.6	109	3.2	8.3	15.5	48.5	1.7	0.224	0.672	21.504	22.4	0	0	353	56	99	213	2.8	5.2	29	33.1	88	16	3.78	64	1
1.8	7.34	11	27	9.3	83	100	5.8	115	32.9	11.7	0.6	19	2.1	2.7	18.9	53.9	1.7	1.3685	0.805	9.177	11.5	0.2	1	54	120	447	200	3.6	7.6	36.6	35.6	103	18.5	3.21	49	0
1.8	7.21	24	11	6.5	120	78	3.3	152	27.4	9	2.9	55	1.7	4.6	15.6	71.1	1.6	0.952	0.714	19.278	23.8	0	3	51	124	218	166	2.5	0.2	31.6	32.8	96	15	2.84	65	0
1.8	7.34	18	30	7.7	95	178	4	139	37.2	13.2	0.8	15	1.7	3.3	13.8	25.1	1.2	0.795	2.226	11.448	15.9	0	0	219	151	390	152	2.9	0.9	32.3	35.4	91	13.7	4.08	75	0
1.8	7.42	10	31	8.4	95	98	4	132	31.4	10.4	0.6	24	1.6	3.5	13.7	33.9	1.2	1.8758	0.6972	13.9938	16.6	0.1	0.2	105	114	191	149	2.9	0.3	29.7	33.2	90	13.8	3.51	77	0
1.8	6.97	28	23	8.2	89	800	6.6	135	47.3	13.8	1.4	21	2.4	7.5	13.2	28.3	1.2	1.686	0.843	25.29	28.1	0	0	279	73	149	112	4.1	1.3	33.6	29.2	115	12.9	4.11	34	0
1.8	7.43	11	27	8.2	108	118	4.2	142	23.7	7.8	0.6	26	2.3	3.4	13.1	23.9	1.1	1.5088	0.492	14.1696	16.4	0.5	0.9	569	73	149	112	2.9	1.3	29.5	33	90	17.5	2.65	74	0
1.8	7.23	13	23	7.1	110	122	2.6	143	36.3	12.8	2	11	1.9	3.1	14.9	31	1.3	0.792	0.198	4.488	6.6	0	0	103	73	149	112	2.8	1.3	30.5	35.4	86	13.7	4.22	72	0
1.8	7.34	20	20	9.1	93	145	4	129	36.6	12.9	0.6	16	2.3	4	10.6	26.5	0.9	1.0956	0.462	11.55	13.2	0.1	0.6	605	43	59	111	3.9	0.4	32.2	35.3	91	13.2	4.01	69	0
1.8	7.42	15	24	7	106	91	5.4	140	32.9	10.9	1.1	22	1.6	2.2	16	34	1.7	0.6723	0.249	7.1297	8.3	0.5	2.5	129	19	355	94	2.8	4	29.6	33.3	89	15.8	3.69	63	0
1.8	7.26	17	17	7.9	100	165	4.4	130	42	13.8	1.5	36	1.6	3	15	20.8	1.3	0.688	0.432	14.72	16	0.3	0.7	274	38	72	88	2.2	0.8	29.4	32.9	89	13.5	4.7	75	0
1.8	7.34	23	22	10.9	101	388	4.2	142	38	13.1	4.9	72	1.4	3.9	11.2	32.1	0.9	0.702	0.468	9.36	11.7	0	0	192	53	63	84	2.7	1.4	30.5	34.6	88	14	4.31	64	0
1.8	7.42	18	22	8.3	100	136	3.7	136	36.8	11.2	2.7	37	2.5	2.1	34.4	52.1	7.5	2.502	0.684	14.508	18	0.2	1.5	230	73	484	83	2.7	1.2	25.7	30.4	85	17.1	4.34	70	0
1.8	7.32	18	27	9.4	97	190	4.9	137	39.5	14.1	1	23	1.9	3.4	13.1	41.6	1.1	0.9782	0.3216	12.0466	13.4	0.2	0.2	236	23	98	78	3.9	0.7	30.2	35.8	84	13.6	4.68	86	0
1.8	7.26	15	20	6.8	103	152	4.1	134	36.8	11.8	0.5	37	1.3	3.1	14	29.5	1.2	1.66	1.992	11.952	16.6	0	0	313	24	62	73	2.5	0.3	32.2	32	100	18	3.67	86	0
1.8	7.31	19	19	8.3	86	143	4	120	32	11.1	6.3	87	2	4.7	15.1	33.7	1.3	0.784	0	13.916	19.6	0	0	370	30	105	69	2.8	0.5	35	34.8	101	13.4	3.18	49	0
1.8	7.49	20	25	8.3	108	107	8.7	144	25.5	8.4	1.1	46	2.1	2.9	23.4	30.2	2.2	1.8573	0.5535	9.6555	12.3	0.2	1.7	475	19	121	69	2.8	0.4	29.5	32.9	90	15.2	2.84	84	0
1.8	7.37	14	29	7.5	101	166	4.6	139	33.4	10.9	2.1	23	1.9	1.4	15	52.4	1.3	0.332	0.332	6.225	8.3	0	0	105	60	905	67	2.1	0.7	29.4	32.6	90	20.2	3.69	79	0
1.8	7.4	27	16	9.2	97	48	7.4	133	29.7	8.7	3.6	70	2.7	8.8	16.4	30.7	1.4	0	2.386	115.721	119.3	0	0	868	30	252	66	3.4	1.3	21.9	29.1	75	20.2	3.95	82	1
1.8	7.47	17	31	8.9	90	175	3.8	134	40.8	13.7	2.6	37	2.3	3.6	28.7	37.1	2.8	1.032	0.7912	15.2048	17.2	0.4	0.7	301	85	352	64	2.9	0.9	30	33.7	89	15.3	4.58	71	0
1.8	7.4	14	23	8.3	107	304	4.3	140	37.8	12.5	0.6	15	2.1	2.2	13.1	25.9	1.1	0.544	0.408	11.288	13.6	0	0	228	68	173	62	2.9	0.6	30.6	33.1	93	13.6	4.09	55	0
1.8	7.45	19	21	9.4	98	91	5.2	133	30.3	8.9	1.9	73	2.5	4.4	17.9	30.1	1.6	1.167	0.778	36.566	38.9	0	0	482	39	216	60	4.1	2.5	23.7	29.3	81	22.5	3.74	72	0
1.8	7.42	13	27	8.3	99	90	5.2	134	33.7	10.6	7.6	56	2.5	2.9	19.2	41.9	1.8	1.582	1.0848	7.7179	11.3	0.3	7.8	100	28	157	60	2.7	4	35.6	31.4	114	19.3	2.97	48	0
1.8	7.38	12	23	7.6	101	144	4.1	132	33.7	11.2	0.9	26	1.8	2.9	17.8	38.3	1.7	0.5	0.8	8.4	10	0	0	152	25	117	57	2.1	2.4	31.8	33.3	96	18.9	3.52	74	1
1.8	7.32	12	20	6.7	105	105	4.4	133	24.8	8.3	2	37	1.6	3.7	14.8	35.1	1.3	0.8016	0.4175	15.4308	16.7	0.3	0.1	132	39	258	53	1.6	0.9	30.9	33.5	92	17.6	2.69	77	0
1.8	7.46	14	29	8.7	104	149	5.6	141	35.5	10.9	1.5	27	2	3	13.8	25.7	1.3	0.436	0	8.393	10.9	0	0	190	28	58	52	2.6	0.7	26.2	30.6	86	14.9	4.14	74	1
1.8	7.35	14	20	7.3	107	104	4.3	137	27.2	8.8	1	17	1.4	2	14.5	34.3	1.3	0.1273	0.067	6.3248	6.7	0.2	2.6	230	41	64	52	2.9	0.4	25.5	32.5	78	19.3	3.47	46	0
1.8	7.38	14	23	7.3	99	108	3.2	133	34.7	11.5	2.4	62	2.1	4.3	40.2	52.4	4.5	0.98	0.28	11.06	14	0	0	126	21	153	51	2.6	1.8	34.6	33	105	17.5	3.31	77	0
1.8	7.28	15	21	5.2	108	86	4.2	140	29.9	9.7	1.6	31	1	3	15.2	33.9	1.6	0.17	0	13.94	17	0	0	234	26	169	49	1.8	0.6	29.6	32.3	92	16.2	3.26	77	1
1.8	7.5	20	24	9.6	101	89	4.8	140	37.7	11.7	2	51	2.5	4.7	14.7	29.7	1.3	0.6675	0.2136	7.9477	8.9	0.2	0.5	148	32	184	48	4.1	1	29.4	31.1	95	16.2	3.99	78	0
1.8	7.39	11	24	7.8	98	129	3.1	130	23	7.8	2.1	19	1.6	3	19.7	25.8	1.9	1.083	0.285	7.068	9.5	0.3	11	194	58	95	47	2	0.6	30.8	33.9	91	15.3	2.53	69	0
1.8	7.48	17	21	7.5	107	162	4.2	141	24.1	8.5	3.6	51	1.9	4.7	13.7	27.6	1.2	1.1457	0.7353	15.1848	17.1	0.1	0.1	175	32	46	45	2.6	1.1	31	35.1	88	16.9	2.73	86	0
1.8	7.3	21	21	8.9	89	121	4.4	127	32.2	10.9	2.8	38	1.8	4	13.1	30.3	1.1	1.34	0.804	11.122	13.4	1	0	220	62	206	42	2.6	1.2	31.8	33.8	94	13.3	3.42	70	0
1.8	7.41	14	31	9.2	107	254	3.9	148	32.1	9.3	3.7	52	2.5	2.2	23.2	43.6	3.6	1.4335	0.976	27.999	30.5	0.1	0.1	230	27	291	42	2.9	0.6	28.5	28.9	99	17.2	3.25	52	0
1.8	7.37	16	17	10.6	117	93	4.4	146	32.9	10.7	1.3	23	2.2	4.3	14.5	23.5	1.3	2.6106	0.6156	7.9914	11.4	0.6	1	522	14	162	41	2.3	0.2	29.8	32.7	91	18	3.61	61	0
1.8	7.28	19	15	7.3	108	44	3.7	138	37.1	11.2	2.3	40	1.7	3.4	15.4	32.6	1.6	0.055	0.165	3.795	5.5	0	0	119	47	564	38	2.7	3.3	27.4	30.1	91	15.4	4.07	51	0
1.8	7.43	11	23	7.9	114	109	3.8	144	40.3	13.5	1.4	22	1.8	2.1	14.5	25.9	1.3	0.485	0.485	7.76	9.7	0	0	180	29	56	33	2.9	1.1	31.2	33.4	94	12.5	4.31	74	0
1.8	7.4	18	19	6.7	102	69	3.3	136	35.3	10.9	2.4	26	1.6	3.3	13.7	34.3	1.3	0.858	0.312	14.3364	15.6	0.3	0.3	310	13	225	32	2.5	1.2	25.1	30.8	82	17.3	4.33	68	1
1.8	7.34	13	27	8.4	103	182	4.6	138	33.5	10.3	1.5	36	2.5	4.5	13.1	29.9	1.1	1.0736	0.3416	10.736	12.2	0.2	0.2	451	55	165	31	2.8	0.5	25.5	30.9	83	15.5	4.06	64	0
1.8	7.21	11	29	7.4	104	251	3.1	141	30.7	9.5	0.8	22	1.8	2.3	13.8	25	1.2	0.2964	0.7752	21.66	22.8	0.1	0.1	207	18	116	30	2.9	0.2	25.8	31	83	13.5	3.7	27	0
1.8	7.42	19	25	7.4	102	146	4.1	142	28.6	9	7.1	54	2.1	6.8	30.6	47.2	6.5	0.896	1.0752	10.6496	12.8	0.3	1.1	547	12	155	28	2.9	0.3	29.4	31.4	94	16.4	3.05	71	0
1.8	7.34	17	23	9.6	104	205	4.9	139	32.3	11.5	0.9	26	2.2	4.7	12.2	25.2	1.1	1.9992	0.357	7.752	10.2	0.1	0.7	239	16	76	28	3.4	0.3	32.9	35.6	92	14.8	3.49	74	0
1.8	7.34	20	17	9.3	104	83	4.1	137	43.9	14.6	5.6	76	2.3	5.5	39.4	42.9	12.1	0.561	0.2244	3.978	5.1	0.23	0.96	161	32	122	27	3.6	2	30.5	33.2	92	15	4.78	43	0
1.8	7.43	13	23	7	93	84	4.7	124	33.2	11.7	0.2	19	1.6	2.7	12.4	29.1	1	0.012	0.004	0.176	0.2	0	0	85	30	109	26	2.8	0.8	30.9	35.4	87	14.2	3.79	78	1
1.8	7.14	11	32	9	99	124	4.9	137	34.3	11	0.5	10	1.8	3.9	12.8	29.2	1.1	0.434	0.31	5.332	6.2	0	1	202	19	76	26	2.8	0.6	27.8	32.1	87	15.8	3.96	51	0
1.8	7.34	15	21	6.7	104	85	3.8	136	35.1	12.4	1.2	25	1.6	2.4	13.4	31.7	1.2	0.66	0.66	11.385	16.5	0	0	90	43	124	26	2.5	0.6	29.5	35.3	84	12.9	4.2	51	0
1.8	7.4	13	24	8.8	99	76	4.2	132	30.9	10.4	2.2	40	2.1	3.5	13.1	26.4	1.1	0.3864	0.2016	16.1952	16.8	0	0.1	121	135	96	25	2.5	0.3	33.9	33.7	101	16.1	3.07	81	1
1.8	7.34	17	18	7.5	91	664	4.4	122	28.4	9.1	2	52	1.6	1.8	13.8	26.7	1.2	0.5888	0.2944	17.5168	18.4	0.1	0	345	61	268	24	2.8	0.6	31.7	31.9	99	15.9	2.86	65	0
1.8	7.44	15	30	8.1	95	98	4.7	135	32.9	11	1.5	35	1.7	3.7	13.7	26.8	1.2	1.467	0.815	13.855	16.3	0	0	221	10	71	24	2.6	0.4	29.1	33.6	87	16.5	3.79	64	0
1.8	7.16	18	25	9.1	97	174	6	134	29	8.6	4.8	65	2.6	9.4	13.4	30.2	1.1	1.0127	0.3705	23.1933	24.7	0.1	0.5	467	13	95	24	3	0.1	26.4	29.8	89	16.7	3.27	63	0
1.8	7.27	17	25	10.2	101	97	4.6	138	28.2	9	1.7	122	1.8	2	11.9	26.4	0.9	0.5977	0.834	12.0652	13.9	0.4	2.6	293	19	102	24	2.9	0.2	29.2	31.9	92	18.5	3.08	83	0
1.8	7.34	17	32	8.7	101	118	3.5	146	35.1	11	1.6	30	1.7	3.8	13.2	45.4	1.1	1.0416	0.2604	7.0056	8.4	0.4	0.7	274	16	93	24	3.1	0.2	27.4	31.4	87	16.7	4.04	70	0
1.8	7.36	19	15	7.2	110	75	4.7	139	32	10.3	7.7	80	1.5	6.4	40.7	65.7	4	1.8265	0.494	3.692	6.5	0.5	7.1	187	21	286	23	2.3	0.1	28.4	32.1	89	15	3.61	67	0
1.8	7.46	13	34	9.8	98	113	4.1	141	33.2	9.9	4.1	25	2.4	3.4	14	37.2	1.2	1.6492	0.3534	3.9804	6.2	0.6	2.9	185	19	111	22	3.1	0.5	28.7	32.4	89	19	3.46	73	0
1.8	7.4	22	20	8	99	348	4.7	136	27.4	8.6	2.1	99	3.5	5	13.9	40.4	1.2	2.277	2.277	19.481	25.3	0	0	307	40	269	22	3	0.2	28	31.5	89	17.6	3.08	58	0
1.8	7.44	14	26	8.1	100	258	4.8	135	35.6	11.6	1.1	45	1.6	0.9	11.9	26.3	1.1	0.8382	0.3036	5.412	6.6	0.5	0.2	192	41	28	22	3.7	0.2	31	32.6	95	13.4	3.75	47	0
1.8	7.42	16	18	10.5	111	168	5.4	140	27.1	9.6	2.5	37	1.8	1	13.9	29.7	1.2	1.2213	0.4956	15.9654	17.7	0	0	157	10	63	22	3.8	0.6	31.6	35.3	89	12.7	3.04	86	0
1.8	7.31	12	22	7.9	119	204	3.9	149	32.6	10.7	1.2	8	1.3	1.9	14.8	30.2	1.4	1.1445	0.4469	9.1342	10.9	0.3	1.4	212	32	71	22	3.5	0.4	31.2	32.7	95	16	3.43	56	0
1.8	7.51	12	23	7.3	114	126	3.9	145	33.8	11.8	0.8	11	1.7	3.9	14.4	27.6	1.4	0.741	0.4104	10.1118	11.4	0.1	1	285	24	121	21	3	0.5	31.9	34.8	92	13.2	3.69	72	0
1.8	7.38	23	25	8.8	98	92	3.6	142	46	14.7	7.2	35	1.9	5.3	14.5	27.9	1.4	0.756	0.588	6.636	8.4	0	2	103	17	189	20	3.3	0.3	29.4	31.9	92	17.4	4.99	71	0
1.8	7.43	14	23	8.8	99	96	4.4	132	30.2	9.7	1.2	15	1.8	2.8	13.2	28.3	1.1	0.589	0.3325	8.227	9.5	0.1	3.5	494	26	67	20	2.7	0.4	27.7	32.1	86	19.3	3.5	61	0
1.8	7.34	16	25	10.2	100	141	5.2	136	33.8	11.4	0.9	43	2.1	5.3	14.5	27.3	1.3	1.984	1.736	18.104	24.8	0	0	468	29	123	20	3.1	0.6	29.6	33.9	88	14.5	3.86	65	0
1.8	7.34	15	22	7.8	103	98	4.2	136	34.5	11.4	1.3	18	1.5	1.6	13.5	29.9	1.2	0.912	0.492	10.5	12	0.1	0.6	222	25	113	20	3.3	0.7	31	33.2	93	13.3	3.7	70	0
1.8	7.19	11	11	5.5	133	668	3.4	152	31.4	9.9	2.1	47	1.9	1.9	14.7	29.3	1.3	3.999	0	7.224	12.9	0	0	298	12	80	20	2.7	0.1	30.1	31.4	96	13.7	3.28	46	0
1.8	7.46	13	31	7.6	94	265	4.2	134	30.6	10.5	0.9	28	1.9	2.7	15.4	28.5	1.3	0.672	0.588	2.814	4.2	0	0	106	16	60	19	2.9	0.4	31.8	34.5	92	14.9	3.32	86	0
1.8	7.33	16	26	9.2	101	87	4.5	138	37.1	12.1	0.7	11	1.4	3.2	14.2	27.1	1.2	0.968	0.3872	6.864	8.8	0.23	0.96	233	33	191	19	3.4	0.5	29	32.7	89	15	4.17	39	0
1.8	7.34	13	30	7.9	111	180	4.1	150	23.6	7.4	1.7	77	3.1	4	14.7	33.6	1.3	1.4028	0.4509	14.7127	16.7	0.4	0.4	357	18	87	19	2	0.4	26.1	31.3	83	17.6	2.83	76	0
1.8	7.37	19	37	8.5	94	105	4.2	146	32.9	10.5	1.9	49	1.9	3.8	12.5	24.9	1.1	2.268	0.432	7.668	10.8	0	0	375	19	79	18	3.3	0.3	28.6	31.9	90	16.4	3.67	64	0
1.8	7.4	15	26	7.8	99	140	3.8	136	35.3	12.1	0.8	20	1.8	2.5	16.6	45.1	1.5	0.8904	1.1766	29.5104	31.8	0.2	0.3	240	20	63	18	4.1	1.4	32.8	34.3	96	14.4	3.7	79	0
1.8	7.34	13	20	8.4	106	139	4.3	135	30	10	1	17	1.5	2.3	15.4	39.1	1.6	1.3407	1.0573	8.2731	10.9	0.2	1.9	277	11	71	18	2.9	0.8	31.9	33.4	96	17.4	3.14	64	0
1.8	7.2	14	22	9.2	103	187	5.6	133	33.9	10.9	2.6	41	2	5.1	14.7	28.3	1.3	1.0126	0.498	14.9898	16.6	0.2	0.6	415	15	84	17	2.9	0.4	29	32.2	90	16.5	3.76	74	1
1.8	7.34	13	27	9.1	105	135	4	141	32.8	10.3	0.8	21	2.6	2.7	12.1	24.2	1	1.2797	0.8375	4.4287	6.7	0.6	1.6	830	9	83	17	3.1	0.2	25.7	31.5	82	18.2	4.01	63	0
1.8	7.4	14	25	7.8	106	100	3.9	141	36.6	12.2	1.4	20	1.9	2.4	15.7	29.9	1.4	0.81	0.27	10.935	13.5	0	0	204	9	97	17	2.4	0.4	35.6	33.4	107	14.1	3.43	48	0
1.8	7.48	16	28	8.7	99	167	4	139	31.2	10.3	1.9	48	2.5	3.4	15	23.8	1.3	1.938	0.612	22.644	25.5	0.5	0.7	704	20	80	16	3	0.6	25.2	32.9	77	17.8	4.08	76	1
1.8	7.34	17	23	9	100	188	4.3	136	38.6	12.7	1.3	35	2	3.1	14	32.9	1.3	1.3072	0.6384	13.1936	15.2	0.2	0.1	295	16	67	16	4	0.5	28.3	32.9	86	15.5	4.5	85	0
1.8	7.25	14	28	8.9	100	103	3.9	138	38.7	11.7	2.9	22	1.6	1.1	13.4	37.2	1.2	0.498	0.498	14.442	16.6	0	0	180	11	66	16	3.6	0.1	29.8	30.1	99	16.2	3.91	66	0
1.8	7.21	13	25	6.4	107	158	3.5	141	32.1	10.7	1.4	30	2	2.8	22.3	46.4	2.1	2.1408	2.1408	17.8846	22.3	0.5	0	263	14	37	16	2.5	0.4	23.7	33.2	71	15.7	4.51	63	0
1.8	7.34	15	22	8.5	129	502	4.2	162	49.5	15.5	1.8	79	1.9	2.6	14.7	25.7	1.3	1.3578	0.4526	12.5122	14.6	0.3	1.5	232	16	110	16	2.9	0.3	28.2	31.2	90	16.4	5.48	82	0
1.8	7.34	14	30	7.9	97	46	4.2	137	34.9	11.1	2.6	29	1.9	2.8	14.3	27.4	1.2	1.76	0.66	17.16	22	0	0	192	24	128	15	2.8	0.4	27.6	31.9	87	17.1	4.03	82	0
1.8	7.05	27	8	9.3	106	594	7.3	134	30.7	9.9	6.9	149	2.3	11	22.2	34.7	2.1	1.4664	0.6006	5.5068	7.8	0.6	2.3	167	16	78	14	3.3	0.2	27.9	32.2	87	17.3	3.55	64	0
1.8	7.3	18	18	8.7	106	116	3.1	139	31.6	10.5	0.8	16	1.6	2.9	14.8	29.1	1.3	1.075	1.29	17.845	21.5	0	0	493	16	40	14	2.8	0.5	30.6	33.3	92	15.3	3.44	88	0
1.8	7.34	12	19	7.4	108	193	4.2	135	33.9	11.5	1.2	9	1.2	2.1	16	33.5	1.4	0.494	0.741	17.29	24.7	0	0	644	11	61	14	2.1	0.5	27.4	34	81	16.4	4.21	46	0
1.8	7.18	21	16	8.6	109	139	8.8	137	31.1	10.2	2.6	63	1.3	4.8	14.6	28.9	1.4	3.0607	0.4826	8.9662	12.7	0.2	1.3	203	73	156	14	2.9	0.2	30	32.9	91	15.7	3.41	71	0
1.8	7.34	16	32	12	92	190	2.8	137	32.1	11.1	8	50	1.9	4	13.9	35	1.3	0.81	0.54	9.45	13.5	0	0	74	13	74	13	4.1	0.6	29.8	34.6	86	18.8	3.73	67	0
1.8	7.4	15	20	8.5	98	155	3.4	130	33.8	11.5	1.3	19	1.4	1.4	21.8	27.6	3.4	0.476	0.408	0.561	1.7	0	2	271	10	68	13	3.8	1.7	34	33.9	100	20.1	3.37	64	0
1.8	7.42	18	25	9.1	98	106	5.1	136	29.2	9.4	6.3	63	2.2	5.3	14.8	26.3	1.3	0.6552	0.2016	7.4844	8.4	0.1	0.5	347	4	172	12	2.5	0.4	31.5	32.2	98	15.5	2.99	58	1
1.8	7.36	13	27	8.7	97	339	4.5	132	30.8	10.5	0.7	17	1.9	3.5	11.2	27.5	0.9	0.891	0.3564	6.318	8.1	0.23	0.96	307	9	67	10	2.7	0.3	26	34.1	76	15	4.03	59	0
1.8	7.09	14	21	6	110	87	4.3	141	31.7	9.9	4	55	1	6	27.5	49.7	5	0.876	0.073	5.037	7.3	0	0	393	5	81	10	1.8	0.3	30.6	31.4	97	15.9	3.25	80	1
1.7	7.34	19	26	8.3	95	333	5.7	134	29.9	10.2	2	46	2.1	3.5	21.4	36.3	2.1	0.395	0.158	7.2285	7.9	0.4	1.1	272	312	134	456	3.2	1.1	31.1	34	92	15.8	3.26	71	0
1.7	7.43	9	21	7.6	106	96	4.2	132	31.6	10.7	0.8	18	1.5	2.4	16.3	31.4	1.8	1.764	0.392	4.83	7	0.1	0.1	116	291	96	357	2.5	1.9	36.4	33.8	108	16.2	2.93	69	0
1.7	7.42	13	27	8.5	98	141	3.9	134	24.9	8.2	0.8	25	2.1	3.1	12.8	28.3	1.2	1.3532	0.796	17.711	19.9	0.2	0	256	200	256	215	2.7	2.4	33	33	100	14	2.49	78	0
1.7	7.44	15	19	7	109	230	4.7	138	30.7	10.5	0.8	39	1.9	4.3	12	20.5	1	1.0686	0.1781	12.3163	13.7	0.4	0.5	257	119	55	175	2.9	0.5	29.1	34	85	16	3.6	64	0
1.7	7.41	16	18	7.5	88	264	4.1	118	36.2	12.8	1.2	39	2.4	4.1	14.3	37.2	1.3	0.46	0.184	5.888	9.2	1	0	188	139	74	159	2.6	0.8	27.2	35.5	77	14.9	4.72	59	0
1.7	7.28	14	30	8.3	100	45	5.4	139	32.4	10	2.3	44	2.5	4.7	21	41.6	2.9	0.9198	0.756	10.6848	12.6	0.2	1.6	295	55	120	159	3.6	0.4	28.5	30.7	93	16	3.49	71	0
1.7	7.38	14	24	8.3	100	131	3.6	134	33	10.9	0.9	17	1.8	4.2	14.5	36.3	1.4	0.816	1.734	2.448	5.1	0	0	29	73	149	112	2.9	1.3	27.3	32.9	83	15	3.98	84	0
1.7	7.39	15	29	7.8	101	392	4	141	36.7	11	0.7	17	2	3	78.5	33.6	9.9	0.3192	0.0684	10.9668	11.4	0.1	0.3	386	73	149	112	2.9	1.3	23.8	30	79	14.3	4.63	69	0
1.7	7.42	13	24	8.2	103	119	3.7	136	26	9.3	0.4	15	1.8	3.6	23.5	42.5	3.8	0.172	0.172	8.084	8.6	1	0	277	73	149	112	2.9	1.3	29.9	35.8	83	14.9	3.11	79	0
1.7	7.26	16	25	8	104	81	4.1	141	32.4	10.5	1.6	38	1.2	3.7	14.2	29.8	1.3	0.5256	0.1825	6.5116	7.3	0.3	0.8	251	73	149	112	2.9	1.3	27.9	32.3	86	14.4	3.75	70	0
1.7	7.21	23	18	9.6	90	115	6	125	33.2	11.5	9.3	57	1.8	7.5	13	20.5	1.1	0.236	0.826	10.03	11.8	0	0	173	58	262	90	2.6	1	33.8	34.6	98	14.1	3.4	66	0
1.7	7.26	11	16	8.9	115	105	3.6	138	27.7	9.1	2.2	31	2.2	3.7	18	37.4	1.6	1.0318	0.4355	4.824	6.7	0.7	5.4	103	62	189	89	2.9	2.2	33	32.9	100	18.2	2.77	56	0
1.7	7.38	15	20	7.1	104	123	4.2	135	37.8	12.6	1.5	41	1.6	2.6	14.3	28.4	1.4	1.2692	0.1336	15.03	16.7	0.2	1.3	151	153	149	83	2.4	0.4	27.8	33.4	83	15.2	4.54	83	0
1.7	7.43	12	21	9.3	93	124	6.4	120	35.8	11.7	0.9	46	2.1	4.3	15.2	28.2	1.3	1.3024	0.7992	12.6096	14.8	0.3	0.4	145	30	250	77	2.5	1.4	31	32.6	95	20.4	3.77	52	1
1.7	7.34	14	20	6.4	103	102	5.7	131	39.1	12.9	1.1	9	1.8	2.3	13.5	32.6	1.2	1.413	0.785	12.56	15.7	0	0	250	21	53	75	2.6	0.3	30.3	33.1	92	13	4.27	44	0
1.7	7.48	13	31	9.1	98	88	3.1	139	41.9	13.7	0.4	14	2.2	3.4	11.5	24.6	1	1.5128	0.5124	10.004	12.2	0.3	1.1	536	198	131	70	3.4	0.8	31.7	32.7	97	15.2	4.33	65	0
1.7	7.23	13	23	7.3	114	113	4.3	146	38	11.9	0.8	29	1.6	4.2	42.4	49.3	4.2	0.2556	0.4118	13.5042	14.2	0.1	0.1	164	41	58	70	3.1	0.4	30.3	31.3	97	13.8	3.93	77	1
1.7	7.38	16	28	9.4	101	143	4.9	140	31.5	10.2	1.5	34	1.8	2.4	21.7	29.8	2.1	0.102	0.102	3.978	5.1	0	0	291	92	670	69	4	0.4	32.8	32.5	101	15.8	3.11	57	0
1.7	7.42	17	27	8.2	108	83	3.9	148	26.1	8.8	1.6	52	2.5	4.9	12.7	25	1.1	0.4446	0.078	7.2618	7.8	0.1	0.1	189	50	91	67	2.8	0.4	31.9	33.6	95	16.5	2.74	72	1
1.7	7.37	18	29	8.2	100	104	3.7	143	41.5	13.4	0.9	34	1.9	2.9	38.2	58.4	10.1	2.223	2.47	20.007	24.7	0	0	169	54	299	66	2.2	1.9	28.7	32.4	89	14.3	4.69	55	0
1.7	7.42	20	22	8.7	93	40	3.6	131	35.8	11.4	1.8	45	1.4	5.6	17	34.3	1.5	2.25	0.5	9.625	12.5	0	0	348	81	88	65	3.4	1.2	25.5	31.7	80	17.5	4.46	63	1
1.7	7.53	7	31	8.3	98	280	3.7	132	27.2	9.2	1.2	16	2	2.9	17.5	36.7	1.6	0.253	0.1012	1.794	2.3	0.23	0.96	21	42	217	65	2.4	2	34.2	34	101	16.2	2.7	58	0
1.7	7.35	20	29	8.9	98	110	3.6	143	33.2	10.6	2	49	1.6	4.9	12.4	22.6	1	0	1.015	11.165	14.5	0	0	293	46	63	62	4.2	0.6	28.5	32.1	89	14.2	3.73	79	0
1.7	7.44	12	24	9	102	118	3.5	134	45.9	15.6	0.8	13	1.9	3.3	12.4	22.7	1	1.5642	0.594	7.2963	9.9	0.4	4.1	192	26	495	62	3.3	11.9	31.6	34	93	14.3	4.94	70	0
1.7	7.25	12	28	9.2	96	162	6.3	130	33.2	10.6	1.9	41	1.7	2	12.6	22.4	1.1	0.407	0.222	2.886	3.7	0	2	190	18	32	51	2.9	0.2	31.7	31.8	100	13.4	3.33	62	0
1.7	7.38	14	29	8.5	98	119	4.2	137	30.1	9.3	6.9	40	2.4	5.3	23.2	51	2.3	2.3628	0.8234	14.4274	17.9	0.2	1.5	49	29	133	49	3.1	5.3	35.9	31	116	19.2	2.6	48	0
1.7	7.41	18	26	8.4	105	178	4.6	144	35.5	11.5	2.6	47	2.1	5.1	14.5	24.2	1.3	1.048	0.524	22.794	26.2	0	0	389	30	67	48	3.2	0.4	29.2	32.5	90	14.5	3.94	57	0
1.7	7.43	19	25	9	93	189	3.8	133	48.7	16.3	1.5	17	1.8	1.6	11.7	31.7	1	0.325	0.39	5.59	6.5	0	0	141	52	125	46	3.5	0.3	36.5	33.4	109	13.6	4.46	56	0
1.7	7.29	9	28	7.8	110	106	2.9	144	26.9	8.3	1.8	11	1.3	1.4	13.6	85.2	1.2	1.197	0	12.103	13.3	0	0	85	22	145	46	2.9	0.3	30.1	30.8	98	17.2	2.75	58	1
1.7	7.41	21	20	8.7	98	98	3.8	135	30.6	10.5	1.1	12	1.5	4	13.4	29.4	1.3	0	0	6.63	13	0	0	190	49	616	45	1.9	1.5	28.7	34.5	83	13.9	3.68	42	0
1.7	7.34	17	19	9.2	107	109	5.4	138	37.3	12.4	7.4	72	2.8	7	12.8	31.2	1	1.323	0.735	12.054	14.7	0	2	193	31	245	43	2.6	0.1	31.5	33.4	94	13.5	3.95	48	0
1.7	7.47	11	29	8.4	96	80	4.1	132	28.5	9.6	1	19	1.9	3.8	27.8	56.6	2.9	1.001	0.4004	7.098	9.1	0.23	0.96	106	12	159	42	2.3	12.4	38.7	33.8	115	17.1	2.48	61	0
1.7	7.35	10	24	8.8	110	83	4.2	140	29.5	10.2	0.7	11	1.8	3.5	16.4	24.8	1.5	2.475	0.85	8.6875	12.5	0.9	3	161	32	67	39	2.9	0.8	31.1	34.6	90	15	3.27	57	0
1.7	7.26	15	24	8.5	101	286	4.9	135	37	12.7	1.5	53	1.5	4.7	12.7	29.3	1	0.8643	0.3886	4.6632	6.7	1.1	10.7	287	34	399	38	3.1	1.1	34.9	34.4	101	13.4	3.65	54	0
1.7	7.46	11	23	9.5	109	77	4	139	35.8	11.8	0.7	29	1.4	4.5	13.1	29.2	1.1	1.5741	0.4134	13.2606	15.9	0.6	3.5	344	39	90	38	2.9	0.6	29.7	33	90	16.1	3.97	64	0
1.7	7.34	15	19	8.4	102	91	4.4	132	36.2	12.2	1.1	19	1.7	3	14	29.1	1.2	0.4448	0.2624	2.4544	3.2	0.7	0.6	214	32	182	36	3.8	0.1	29.2	33.7	87	18.4	4.18	63	0
1.7	7.11	17	18	8.1	102	139	5	132	50.1	16.4	2.7	77	2.9	4.1	10.9	33.5	1	0.882	0.8379	12.936	14.7	0.1	0.2	174	39	89	35	4	0.8	33	32.8	101	13.8	4.98	88	1
1.7	7.51	14	21	7.9	107	114	3.6	138	30.8	10.8	0.9	22	1.7	3.2	25.9	37.9	2.5	0.7688	0.3224	11.16	12.4	0.3	1.1	179	26	87	35	2.9	0.9	32.3	35.1	92	14.2	3.35	82	0
1.7	7.34	16	21	8.7	98	110	4.4	131	32.7	11.6	1.2	29	1.7	2.9	14.4	27.4	1.2	1.7958	0.5904	9.8154	12.3	0.4	0.3	201	30	123	33	3.4	1.1	31.1	35.5	88	15.8	3.74	83	0
1.7	7.46	18	18	8.2	106	148	4.4	138	33.8	11.6	0.5	9	1	4.5	12.7	28.7	1.1	1.008	0.738	16.182	18	0.3	0.2	227	15	84	33	2.5	0.6	29.6	34.4	86	17.2	3.92	49	0
1.7	7.36	8	42	8.6	94	181	4.9	139	31.3	10	0.6	18	1.9	3	10.4	25.5	0.8	0.264	0.132	6.1908	6.6	0.2	0.2	247	26	411	32	2.9	0.2	31.6	31.8	99	20.1	3.16	59	0
1.7	7.34	18	22	8.6	103	114	4.8	138	37.7	13.6	1.2	18	2.1	3.2	12.4	24	1	1.1736	0.5379	14.5396	16.3	0.1	0.2	239	18	48	31	4.5	0.9	31.1	36.2	86	14.2	4.38	78	0
1.7	7.36	16	22	7.1	100	94	4.6	133	27.9	9.3	1	22	1.5	4.1	15.2	32.2	1.5	0.553	0.237	5.846	7.9	0	0	270	39	447	30	2.1	1.2	26.6	33.2	80	15.5	3.48	72	1
1.7	7.41	16	29	9	96	216	4.6	136	38.6	12.8	1.5	37	2.3	4	13.2	25.1	1.1	3.1892	0.7638	8.9914	13.4	0.6	2.9	283	17	61	29	2.9	0.8	31	33.2	93	13.5	4.13	64	0
1.7	7.03	15	31	7.7	103	96	5.6	143	25	8.3	1.7	47	2	6.9	14.4	37.5	1.3	0.506	0.1628	1.4784	2.2	0.5	2	192	20	173	29	3.2	0.9	31.9	33.2	96	22.7	2.6	64	1
1.7	7.32	27	21	10.7	99	185	5.1	142	35.1	10.8	8.5	59	1.9	7	15.7	26.8	1.6	2.5443	0.5445	6.138	9.9	1.7	5.1	348	28	201	28	2.7	0.2	30.9	30.8	100	16.9	3.5	43	1
1.7	7.38	15	23	8.1	97	95	6.1	129	31	10.9	0.9	12	1.6	2.7	16.2	38.4	1.5	0.231	0.088	0.286	1.1	0	0	156	24	65	27	3.3	0.5	29.7	35.1	85	15.9	3.66	69	0
1.7	7.41	16	29	8.6	102	155	4	143	42.6	14.8	0.5	8	1.4	3.1	13.8	25.4	1.3	1.9292	0.4982	7.8864	10.6	0.8	1.9	365	25	115	27	3.4	0.4	28.5	34.8	82	13.2	5.2	58	0
1.7	7.4	13	25	8.1	103	118	4	137	27.6	8.8	1.2	20	2.1	1.5	14	29.8	1.3	1.1092	0.3068	10.2896	11.8	0.2	0.6	378	19	86	27	2.9	0.4	26.6	32	83	16.6	3.31	43	0
1.7	7.34	15	20	9	105	114	5.2	135	28	9.6	1.3	38	2	4	15	34.6	1.4	11.725	0	0.7	17.5	0	1	38	25	81	27	3.7	0.6	35.4	34.3	103	16.4	2.71	85	0
1.7	7.32	13	34	8	96	149	3.7	139	32.3	10.8	3.3	20	1.6	3.6	13.4	26.9	1.2	0.8151	0.2793	4.4118	5.7	0.6	2.7	119	10	113	26	3.1	0.2	32.6	33.5	97	15.2	3.33	75	1
1.7	7.36	14	29	9.6	97	121	3.8	136	20.8	8	0.9	11	2	4.4	14.5	24.8	1.3	1.1508	0.0336	0.203	1.4	0.8	0.2	13	45	91	26	4.4	0.7	29.6	38.3	77	12	2.7	26	0
1.7	7.39	11	31	9.3	100	171	3.7	138	28.6	9.7	1	15	2	3.1	12.4	29	1.1	1.032	0.024	0.084	1.2	0	3	33	20	79	26	3.7	0.5	33.4	33.7	99	19.6	2.89	74	0
1.7	7.4	16	21	9.2	106	95	4.2	139	33.1	14.1	1.1	18	2	3	13.7	30.1	1.2	2.394	0.4536	5.418	8.4	0.8	0.8	236	26	99	25	4.1	1.2	34.8	35.6	98	14	4.06	55	0
1.7	7.06	13	38	8.5	89	106	4.6	135	35.1	11	1	44	2.5	6.2	15.6	36.5	1.7	0.9715	0.536	5.0987	6.7	0.7	0.7	286	12	183	24	3.8	0.5	29.8	31.4	95	16.2	3.7	61	1
1.7	7.39	13	31	9.1	94	221	4.5	133	35.9	12	0.9	10	1.9	3.5	14	27.9	1.2	3	1.8	14	20	0	1	560	15	97	24	2.5	0.3	29.5	33.3	89	13	4.05	64	0
1.7	7.38	11	35	7.9	98	86	4.2	140	33.8	11.4	0.5	10	1.7	2.5	13.1	27.2	1.1	1.02	0.42	8.47	10	0.2	0.6	381	18	89	21	2.5	0.3	32.7	33.8	97	19.5	3.49	83	1
1.7	7.28	14	20	7.4	105	126	3.4	136	26.7	8.3	2.5	32	1.7	4.7	14.3	35.8	1.2	1.92	0.96	19.2	24	0	0	551	21	90	21	2.1	0.8	27.6	31.1	89	15.4	3.01	83	0
1.7	7.38	13	22	8.3	108	170	4	139	27.5	9.7	1.5	38	1.5	2.4	26.1	42.3	4.3	0.3976	0.3408	13.4474	14.2	0	0.1	172	33	89	21	3.1	0.6	28.3	35.5	80	13.8	3.44	75	1
1.7	7.32	16	21	7.8	122	123	3.6	155	32.8	10.9	1.8	44	2.2	4.4	14.9	36.5	1.5	1.206	0.6164	24.8436	26.8	0.2	0.3	191	9	79	21	2.4	1.5	28.5	33.1	86	15.5	3.81	81	1
1.7	7.1	21	16	8.6	101	208	5.8	132	27	8.9	4.5	53	1.1	7.4	15.1	29.9	1.5	2.142	0.486	15.318	18	0.1	0.3	331	17	179	20	2.9	0.3	29.4	32.9	89	14.4	3.02	71	0
1.7	7.41	14	29	8.6	97	95	5.8	134	38	12.8	0.7	7	1.8	3.4	13.2	26.9	1.1	3.2457	0.6696	4.9941	9.3	0.6	3.5	284	19	90	19	3.4	1.9	31.5	33.6	94	16.1	4.05	51	0
1.7	7.34	12	19	7.2	116	105	3.7	143	33.4	10.8	0.7	11	1.4	2.7	12.3	26.2	1.1	0.112	0.448	4.704	5.6	0	0	160	11	39	17	2.6	0.4	29.3	32.5	90	12.7	3.7	18	0
1.7	7.44	16	28	9.3	96	94	4.3	136	32.3	10.4	2.5	28	1.4	3.6	13.2	25.7	1.1	1.8306	0.3051	8.7236	11.3	0.1	3.8	460	9	92	16	3.7	0.3	29	32.1	90	17.3	3.58	49	0
1.7	7.34	20	17	7.2	96	67	3.3	130	35.8	12.8	3.6	72	1.7	5.5	16.8	150	2	0.7491	0.5448	21.3834	22.7	0.1	0.1	151	10	104	15	3.2	0.4	32.1	35.7	90	12.7	3.99	80	0
1.7	7.34	22	22	8.4	98	97	4.8	137	35	11.6	6.7	61	1.9	5.1	11.4	48.2	1.1	1.938	0.399	6.9825	9.5	0.3	1.6	137	13	133	15	4.1	0.2	32.1	33.2	97	15.3	3.61	85	0
1.7	7.34	17	19	8.6	107	98	3.6	139	27	9.4	0.7	19	1.7	2.6	20.8	28	1.9	0.798	1.197	36.708	39.9	0	0	311	17	112	15	3.2	0.6	31.2	34.6	90	13.8	3	22	0
1.7	7.36	15	24	7.6	104	116	4.8	138	26.6	8.1	1.9	58	2.4	5	20.7	27.7	2.8	1.1021	0.3424	9.1806	10.7	0.1	0.6	206	4	51	14	3.2	0.5	24.6	30.5	81	17.5	3.3	64	0
1.7	7.42	16	27	8.1	97	180	4.5	135	32.6	10.2	2.7	61	1.4	4.6	13.3	37.2	1.2	0.445	0.801	7.298	8.9	0	0	313	8	71	13	2.2	0.5	29.4	31.2	94	16.8	3.46	61	0
1.7	7.34	14	25	8.2	104	103	4.2	139	39	13.4	0.5	13	1.8	4	27.8	31.5	2.9	1.6872	0.5776	5.1604	7.6	0.3	1.9	422	22	90	13	2.3	0.3	31.5	34.4	91	15.4	4.27	67	0
1.7	7.34	16	25	8.2	104	116	3.7	141	41.2	13.2	0.8	5	1.4	3	18.9	30	1.7	1.4355	0.7047	23.6988	26.1	0.2	0.8	567	13	134	12	3.5	0.3	27.4	32.1	85	15	4.83	33	0
1.7	7.49	12	29	8.8	100	125	3.9	137	33.8	11.9	0.5	12	2	3.4	13.2	30.5	1.1	0.1806	0.1848	3.8052	4.2	0.3	0.4	146	13	67	11	3.6	0.4	30.9	35.1	88	15	3.83	67	1
1.7	7.34	10	26	8.1	109	100	3.7	141	30.3	9.5	0.4	6	1.8	3.4	33.1	38	3.5	1.254	0.396	4.686	6.6	0	4	281	5	100	11	2.8	0.3	25.5	31.3	81	15	3.73	68	0
1.7	7.42	12	22	8	101	110	3.3	132	33	10	0.6	4	2.2	2.7	16	31.9	1.4	2.016	0.616	10.85	14	0.7	0.5	539	7	102	10	1.9	0.2	19.2	30.2	64	19.9	5.19	46	0
1.7	7.34	26	15	7	95	181	3.7	132	22.8	7.5	4	104	2	7.8	15.7	30.6	1.4	0.936	1.56	28.704	31.2	0	0	439	8	220	7	1.6	0.4	27.1	32.8	83	16.4	2.76	44	1
1.6	7.49	12	28	7.4	102	338	3.8	138	13	4.1	0.7	17	1.7	2.1	20.6	30.4	2.7	6.576	0.548	1.096	54.8	0	0	52	176	70	355	2.7	1.7	33.3	31.4	106	24.9	1.23	54	0
1.6	7.13	21	22	7.6	94	60	7.3	130	29.2	9.8	4.8	196	2.7	6.4	39.5	36.4	4.4	0.945	0.189	17.388	18.9	0	0	249	78	412	149	2.3	2.4	29.5	33.6	88	16.3	3.33	80	1
1.6	7.47	6	28	8.1	97	131	3.8	127	32	11.1	0.6	21	1.6	4.1	21.5	45.6	2	0.7257	0.413	4.6079	5.9	0.3	2.4	36	42	247	121	2.3	8.4	34.1	34.8	98	18.8	3.26	49	0
1.6	7.39	21	28	10	94	187	4.2	139	40.1	14.2	7.5	48	2.6	4.7	11.6	26.9	0.9	1.62	0.24	3.42	6	2	10	338	189	434	120	4	0.4	39.9	35.5	112	15.1	3.57	48	0
1.6	7.39	10	37	8.7	98	68	2.9	142	32.2	11	0.4	26	1.8	3.6	11.9	28.7	1	0.87	1.305	11.89	14.5	0	1	188	45	182	114	3	0.6	32.1	34.3	94	17.3	3.44	65	0
1.6	7.36	24	25	7.9	89	188	3.3	135	20.7	7.3	2.3	184	2.8	5.7	29.2	37.2	3.1	1.7952	0.2112	4.5012	6.6	0.3	1	206	73	149	112	2.9	1.3	28.8	35.1	82	18.1	2.52	82	0
1.6	7.35	13	34	9.5	94	97	5.1	136	35.4	11.8	0.8	71	1.9	5.5	12.7	23.6	1.1	1	1	15.6	20	0	5	279	73	149	112	2.9	1.3	31.2	33.4	94	15.9	3.79	75	0
1.6	7.39	15	26	8.7	100	175	4.7	136	31.4	9.8	3	45	2.7	2.5	24.4	49.8	3.9	0.8342	0.4074	8.3808	9.7	0.5	0.3	206	73	149	112	2.9	1.3	29.1	31.2	93	16.3	3.38	71	0
1.6	7.42	17	20	8.1	104	116	4.5	136	33.8	12.6	1.1	29	1.4	3.4	42.5	38.1	4.8	2.086	0.894	9.983	14.9	0	3	440	73	149	112	2.9	1.3	32.7	37.2	88	18.5	3.85	74	0
1.6	7.56	15	28	8.2	104	103	3.8	143	36.9	12	5.5	22	1.5	3.8	13.7	31.3	1.2	0.4503	0.1539	5.0502	5.7	0.5	0.2	306	73	149	112	2.9	1.3	26.5	32.5	82	15.5	4.52	61	0
1.6	7.36	15	21	7.4	106	112	3	139	23.7	7.5	1.2	19	2.1	0.6	13.9	35.5	1.4	3.2	0.16	11.84	16	0	0	298	32	523	112	2	20.4	31.6	31.6	100	20.5	2.37	70	1
1.6	7.34	13	22	7.5	111	129	5.5	140	29.5	9.9	1.5	32	1.7	5.4	14.4	38.3	1.3	0.9779	0.6985	10.8712	12.7	0.2	1	220	73	149	112	2.9	1.3	29.2	33.6	87	17.8	3.38	74	0
1.6	7.37	19	16	6.4	98	83	4.4	129	28.8	10.2	3.8	50	1.7	5.8	15.3	47.1	1.4	0.6674	0.094	8.2532	9.4	0.1	3.9	106	72	176	106	2.1	1.9	30.4	35.2	86	16.9	3.34	71	1
1.6	7.3	21	17	6.5	100	126	3.1	135	33.7	12.4	0.8	9	1.3	2	14.8	33.4	1.5	0.466	1.165	20.271	23.3	0	0	241	95	92	106	2.8	0.8	33.9	36.8	92	12.1	3.65	40	0
1.6	7.34	13	21	7.5	111	128	3.6	141	35.4	12	0.9	19	1.4	1.5	12.4	26.4	1	0.744	0.372	15.81	18.6	1	0	159	216	155	98	3	0.8	30.1	34	89	12.3	4	55	0
1.6	7.5	12	27	8.1	99	127	4.3	134	24.2	8	1.7	70	1.9	3.9	15.8	30.4	1.4	0.801	0.8811	7.1467	8.9	0.2	0.5	168	26	266	96	2.6	1.1	28.8	33.3	87	15.8	2.79	85	0
1.6	7.29	15	17	6.6	114	119	3.8	142	36.4	12.1	0.7	12	1.4	2.4	14.5	91.1	1.3	0.26	0	19.24	26	0	0	207	59	47	89	2.6	0.8	31.6	33.3	95	12.4	3.84	23	0
1.6	7.41	19	23	7.7	99	200	3.8	137	29.6	9.1	4.2	49	1.5	4.4	18.1	31.7	1.7	1.525	1.525	27.145	30.5	0	0	275	47	167	82	2.1	0.3	29.8	30.7	97	16.9	3.05	88	1
1.6	7.34	24	18	8.5	102	159	6	142	32.2	10.6	10.1	123	2.3	8.9	13.9	24.3	1.2	1.44	0.592	13.936	16	0.1	0.1	302	43	54	75	3.2	0.2	29.2	32.7	89	13.6	3.61	62	1
1.6	7.36	21	15	7.6	102	263	4.6	133	40.7	13.9	1.1	36	2	2.6	15.9	30	1.8	1.652	0	19.116	23.6	1	0	297	103	160	71	2.8	0.3	29.2	34.1	86	12.2	4.74	40	0
1.6	7.38	16	25	9.1	103	212	7.2	137	40	13.3	1.4	26	2.4	3.3	12.5	30.3	1.1	1.5587	0.4578	8.7091	10.9	0.5	1.1	246	22	82	69	3.8	0.4	25.4	33.2	77	16.4	5.22	71	0
1.6	7.39	15	23	6.3	108	179	4.4	142	31.1	10.9	0.7	19	1.9	2.9	12.1	26.7	1	0.74	0	6.29	7.4	0	0	146	149	148	68	3.1	0.7	29.2	35.1	83	15.6	3.74	66	0
1.6	7.34	12	33	8.7	97	93	5.9	136	34.5	11.4	0.3	8	1.7	4.3	14.5	31.2	1.3	1.5006	0.244	4.209	6.1	0.6	1.9	208	22	69	67	3.7	0.3	29.6	33.1	89	13.4	3.86	50	0
1.6	7.3	12	44	9.5	91	305	5.5	141	44.1	13.2	0.7	16	2.4	2.9	13.1	30	1.1	1.586	0.854	9.272	12.2	0	0	348	88	59	64	4	0.9	29.3	30	98	14.7	4.52	49	0
1.6	7.01	33	9	6.8	106	780	4.1	144	32	9.4	2.7	40	2.4	2.1	14.4	44.1	1.3	4.488	1.122	28.424	37.4	0	0	577	18	122	64	2.5	0.2	30.1	32.3	93	13.8	3.11	48	0
1.6	7.34	16	28	6.1	99	82	3.5	139	30.1	9.8	7.8	41	1.6	3	14.9	27.3	1.3	1.164	0.291	27.063	29.1	0	0	232	30	102	57	1.5	0.9	29.8	32.7	91	15.5	3.31	50	0
1.6	7.35	12	21	6.6	110	104	3.7	139	23.3	7.9	1.2	15	1.4	2.6	17.9	40.2	1.6	0.4588	0.0592	3.145	3.7	0.5	0.5	117	46	79	56	2.6	0.8	26	34	76	14.4	3.05	41	0
1.6	7.42	18	23	8.2	105	166	4.5	141	38.6	13.1	1.7	31	2.1	4.5	15	34.5	1.3	1.0332	0.9102	22.5828	24.6	0.1	0.1	181	83	134	54	3.1	1.4	31.4	34	92	13.3	4.18	83	1
1.6	7.4	15	23	7.4	103	123	3.3	138	32	11.4	1	23	2	2.4	14.4	26.3	1.3	2.1436	0.466	20.5273	23.3	0.1	0.6	249	64	191	51	2.4	1	30.3	35.5	85	13.9	3.76	33	0
1.6	7.31	16	16	7.5	107	174	3.9	135	26.4	8.6	3.1	51	1.6	4.3	13.4	33.7	1.2	0.6	0.1	7.4	10	0	0	160	12	97	51	2.2	0.2	26.7	32.7	82	14.5	3.24	70	0
1.6	7.28	19	16	7.1	132	125	3.6	163	39.5	12.6	4	103	2.5	4.6	21.9	36.6	2	0.354	1.416	32.922	35.4	0	0	300	14	60	50	2.8	0.2	29.5	31.9	93	13.4	4.27	56	1
1.6	7.36	14	21	7.8	104	132	3.8	135	24.1	7.8	0.8	16	1.7	2.4	14.1	34.3	1.3	0.256	0.256	9.472	12.8	0	0	198	28	122	47	2.9	0.6	29.3	32.3	91	12.8	2.66	87	0
1.6	7.41	29	27	8.3	89	100	6.2	139	50.6	16.9	10.4	45	2.1	6.1	12.2	26.8	1	1.044	0.297	7.56	9	0.1	1	259	70	66	46	3.6	0.2	27	33.3	81	16.8	6.23	57	0
1.6	7.34	16	24	8.2	98	114	5.2	133	33.5	11.5	1.3	34	2	3.8	29.9	34	2.9	0.442	0.17	7.718	8.5	0.5	1.6	224	27	143	46	3.7	1	34.3	34.4	100	15.1	3.36	74	0
1.6	7.32	15	24	9.5	104	344	4.4	139	33.5	11.5	1.6	23	1.9	2.5	27.3	41.8	5.5	3.381	0.6174	5.5174	9.8	0.9	2	417	28	106	44	3.2	0.3	29.5	34.4	86	15.6	3.91	66	0
1.6	7.37	19	22	9.3	99	101	3.8	136	36	12.2	2	25	1.3	1.9	16.8	40	1.9	0.77	0	9.13	11	0	0	202	24	70	41	3.2	0.6	26.6	34	78	12.6	4.6	37	0
1.6	7.25	14	23	6.5	102	88	3	136	37.4	12	0.9	10	1.6	3.1	16.8	25.2	1.5	0.6776	0.4312	14.1834	15.4	0.5	0.2	202	35	230	40	2.4	10	32.8	32.2	102	19.5	3.67	50	0
1.6	7.26	10	35	9.3	96	116	5.2	136	29.4	9.5	0.6	22	1.9	3.5	12.3	23	1.1	0.606	0.303	9.09	10.1	0	0	165	44	268	39	3.6	1.4	27.9	32.5	86	18.1	3.42	41	1
1.6	7.3	13	22	7.9	117	138	4.6	147	43.3	14.6	0.7	26	1.9	4	14	32.6	1.3	2.1746	1.0624	13.3298	16.6	0.3	0	274	30	123	38	2.5	0.8	32	33.6	95	13	4.54	62	1
1.6	7.34	12	24	7.9	103	146	4.4	135	25.6	7.8	1.4	20	1.3	3.4	14.2	54.1	1.3	1.7205	0.2511	6.9285	9.3	0.3	4	340	78	58	37	3	0.7	30.6	30.4	101	16	2.54	76	0
1.6	7.35	11	43	7.6	89	125	3	140	31.2	10.1	2.3	70	2.6	3.3	13.6	27	1.2	0.434	2.17	38.192	43.4	0	0	369	51	162	36	2.5	0.2	27.4	32.2	85	15.1	3.67	62	0
1.6	7.29	19	26	8.6	101	96	3.9	142	30	9.3	4.3	30	1.6	5	14.9	36	1.3	0.7616	0.2688	5.1392	6.4	0.6	3.1	101	7	284	36	2.4	0.5	26	30.8	84	18.7	3.56	74	0
1.6	7.42	23	23	10.9	92	76	6.3	132	41	13.1	12.5	84	4.1	4.1	18.7	29.6	2.2	1.4433	0.3213	3.162	5.1	0.4	3	414	41	161	34	3.3	0.4	33	32	103	18	3.97	34	0
1.6	7.34	20	28	9.5	93	137	6.5	134	36.6	11.9	6.2	31	2.3	4.1	14.2	30.7	1.3	1.9125	0.2754	2.4633	5.1	0.4	8.4	215	10	136	34	3.8	0.3	25.4	32.5	78	21.6	4.69	68	0
1.6	7.35	13	16	7.7	93	92	4.3	118	34.9	12	0.8	12	1.1	4	56.6	47.4	6.1	2.486	0.565	7.91	11.3	0	2	338	13	103	33	2.5	0.6	29.6	34.5	86	21.4	4.06	81	1
1.6	7.34	16	24	8.6	93	134	3.5	129	42.4	15.1	0.8	9	1.8	3.2	12	31	1	0.4738	0.4186	3.5604	4.6	1.6	1.6	152	26	67	33	3.4	1	35.5	35.5	100	13.7	4.24	74	0
1.6	7.26	24	17	10.1	105	152	3.9	142	41.6	13.8	1.6	44	2.5	7.4	13.4	23.6	1.3	3.663	4.07	30.932	40.7	0	0	744	35	132	33	3.9	0.5	31.3	33.2	94	15.3	4.41	86	0
1.6	7.42	13	30	8.4	94	107	3.9	133	32.9	11.5	1.3	19	1.8	2.1	32.7	44.1	3.2	0.7198	0.4636	10.675	12.2	0.5	2.3	154	20	41	32	3	0.6	31.7	34.9	91	14.6	3.61	88	0
1.6	7.45	18	28	8.7	97	319	5	138	30.2	9.7	1.1	18	1.6	3.8	12.7	31.7	1.2	0.93	0.33	8.62	10	0.7	0.5	399	10	101	32	2.7	0.3	29	32.1	90	15	3.34	77	0
1.6	7.34	11	21	8.7	110	178	3.9	138	35.4	12.3	0.6	15	1.4	3.6	14.3	26.5	1.3	0.54	0.648	9.18	10.8	0	0	138	21	124	32	3	2.7	30.5	34.8	88	14.7	4.03	72	1
1.6	7.34	13	33	8.2	95	128	3.6	137	30.1	9.4	1.4	110	2.6	5.6	13.1	30.6	1.1	0.7473	0.3525	12.9438	14.1	0.1	0.3	288	16	297	30	2.3	0.3	32.4	31.3	103	17.5	2.91	74	0
1.6	7.34	20	24	10.4	98	130	3.8	139	45.1	15.8	6.8	20	1.3	3.8	26.5	150	5.2	0.7622	0.2369	9.1155	10.3	0.4	1.5	291	23	139	30	3	0.4	32.7	35	93	14.4	4.83	49	0
1.6	7.45	10	35	8.3	99	187	4.6	139	32.9	10.2	0.5	20	1.6	2.5	12.8	31.4	1.1	1.9257	0.4847	10.2049	13.1	0.5	3.1	606	19	94	30	2.9	0.1	29.9	31	97	15.7	3.4	64	0
1.6	7.35	14	26	8	105	102	4.5	140	28.8	10	1.3	28	2.1	3.1	14.9	29.6	1.3	0.8132	0.304	6.346	7.6	0.1	1.7	185	16	117	30	2.7	0.8	29.6	34.8	85	14.7	3.4	81	0
1.6	7.49	15	21	8.2	107	126	3.8	139	29.7	9.8	0.8	26	1.5	3	14.4	26.7	1.2	1.1808	0.504	12.6	14.4	0.4	0.3	283	17	70	30	2.9	0.5	27.6	32.9	84	16.2	3.55	83	0
1.6	7.18	36	12	8.6	94	233	7	135	39.9	12.1	18.9	134	1.9	4.7	13.9	29.5	1.2	0.8096	0.46	17.112	18.4	0.1	0	182	12	85	29	3.3	1.2	25.7	30.4	84	15.7	4.72	59	0
1.6	7.33	13	32	7.9	95	139	3.8	136	32.8	10.7	0.9	18	1.8	3.8	12.4	26.7	1	1.3572	0.5226	5.8344	7.8	0.6	0.5	192	22	72	28	3.4	0.2	29.6	32.6	91	15.1	3.62	64	0
1.6	7.39	17	24	8.7	105	135	3.2	143	40.5	14.2	1.6	12	2.2	5.2	12.6	20.7	1.1	1.7441	0.6634	8.1106	10.7	0.4	1.4	245	19	68	28	3.8	2.2	31.8	35.1	91	13.4	4.47	64	0
1.6	7.46	15	30	9	89	244	3.9	130	30	9.9	2.3	93	2.6	4.2	14.5	32.6	1.4	0.55	0.22	3.9	5	0.23	0.96	253	21	145	27	3.5	1.3	30.5	33	92	15.7	3.24	61	0
1.6	7.34	14	26	9.7	103	103	4.4	139	33.5	10.9	1.4	14	1.6	2.8	12.1	32.6	1.1	1.5725	0.2635	6.3665	8.5	0.6	2.8	221	19	104	26	3.8	0.3	30.3	32.6	93	14.2	3.61	68	0
1.6	7.34	19	21	9	104	136	4.7	139	33.8	11.4	0.9	23	1.9	3.5	15.2	28.4	1.3	0.6048	0.216	6.2784	7.2	0.2	1.1	420	8	101	25	3.8	0.4	28.5	33.6	85	14.8	3.99	64	0
1.6	7.45	12	30	8.8	105	121	5.9	141	27.1	8.9	1.1	34	1.7	4.3	13	37.3	1.1	0.4848	0.2727	9.3021	10.1	0.1	0.3	226	17	61	25	4	1	30	33	91	16	2.98	86	0
1.6	7.19	15	24	8.9	109	262	5.1	143	32.1	10.2	1.6	44	1.9	3.4	12.5	26.4	1.1	0.5742	0.3168	18.8298	19.8	0.1	0.2	388	29	414	25	2.9	0.2	27.7	31.6	87	16.3	3.67	83	0
1.6	7.21	25	12	9.2	113	126	6.1	144	27.3	8.5	5.9	75	3	7.7	14	29.3	1.4	0.8058	0.3417	3.7434	5.1	0.5	3.6	474	46	496	25	3.5	0.2	29	31.3	92	16.9	2.95	43	0
1.6	7.12	36	8	9.8	92	744	5.5	130	34.3	10.6	3.5	90	2.4	8.7	14.6	37.1	1.3	4.9302	1.0098	13.7214	19.8	0.5	0.1	719	35	286	24	2.9	0.2	30.7	30.9	100	14.1	3.45	39	0
1.6	7.35	16	28	8.6	95	85	4.9	134	29.2	9	2.8	41	1.8	6.6	25.6	39.2	2.4	0.903	0.4158	2.772	4.2	0.4	2.1	117	7	160	24	2.7	0.5	30.7	30.7	100	19.9	2.93	71	1
1.6	7.34	14	25	9.3	103	135	4	138	34.4	11.9	0.9	19	1.8	2.4	12.1	22.9	1	1.053	0.243	6.318	8.1	0	0	133	23	69	24	3.8	0.5	32.5	34.5	94	13.9	3.64	80	0
1.6	7.46	15	25	8.8	106	142	4.9	141	25	8	5.7	47	1.8	2.7	13.6	24	1.2	0.9435	0.408	6.8935	8.5	0.3	2.6	149	14	120	24	2.9	0.5	31.3	31.9	98	16.2	2.54	59	0
1.6	7.34	14	25	8.2	107	131	4	142	24.2	8	1.6	19	2.1	3	11.4	23	1	1.23	0.738	20.91	24.6	0	0	450	22	63	23	3.6	0.2	30.1	33	91	17.3	2.66	69	0
1.6	7.34	12	26	7.7	102	80	3.4	137	30.8	10.1	1.2	39	1.4	2.2	11.1	21.8	0.9	0.2106	0.0081	7.8246	8.1	0.1	0.6	154	14	57	22	3.4	0.4	31.9	32.8	97	15.4	3.17	60	0
1.6	7.42	17	29	8.1	97	195	5.7	137	28.5	9.7	4.7	49	2	2.5	21.6	31.9	2	1.1484	0.3828	15.7296	17.4	0.2	0.6	382	17	75	21	3.8	0.2	34.5	34.1	101	14.7	2.82	65	0
1.6	7.17	16	24	8	98	112	4.5	133	38.1	12.2	3.5	53	1.7	4.8	27.7	41.8	2.7	0.444	0.888	10.804	14.8	1	0	172	19	110	21	3.6	0.7	31.6	32	99	16.6	3.86	77	0
1.6	7.34	17	17	6.5	103	108	3.5	133	23.6	7.3	2.1	27	1	1.7	14.3	33.1	1.3	0.115	0	1.633	2.3	0	0	190	20	173	21	3.6	0.6	27.1	30.9	88	19	2.69	40	0
1.6	7.37	17	21	8.8	104	176	4.8	137	30.2	10.5	1.3	29	1.8	2	14.4	39.3	1.4	0.4104	0.2888	14.4096	15.2	0.1	0.5	246	23	117	21	3.9	0.6	30.3	34.9	87	13.9	3.47	58	0
1.6	7.46	15	30	8.6	95	125	5.2	135	27.2	9	1.7	73	2	3.9	14.4	28.4	1.2	0.354	2.124	31.506	35.4	0	0	569	22	208	20	3.1	1.5	32.6	33.1	99	20	2.76	65	0
1.6	7.35	23	24	9	91	117	5.8	132	42.5	13.2	2.9	44	2.1	5.4	11.5	27.2	1.1	1.836	0.306	7.956	10.2	0	0	684	17	162	19	2.5	0.3	27	31.1	87	17	4.9	46	1
1.6	7.34	26	16	8	103	195	4.2	141	28.8	9.4	2.1	25	1.9	4.3	12.7	48.6	1	1.0248	0.252	7.0644	8.4	0.1	0.5	45	17	117	19	2.3	0.2	36.7	32.6	112	15.6	2.56	76	1
1.6	7.45	16	24	8.1	91	131	3.4	128	44.3	15.8	0.8	16	2.2	3.1	12.1	28	1	0.9672	0.5952	10.8252	12.4	0	0.1	286	19	62	18	3.5	1.1	32.3	35.7	91	13.9	4.89	68	0
1.6	7.29	11	38	8.5	94	250	3.6	139	30.3	10.2	1.5	38	2.1	4	18.1	38	2.2	0.954	0.324	4.434	6	0.5	4.3	243	12	115	17	3.6	0.4	29.6	33.5	88	14.1	3.44	70	0
1.6	7.25	11	30	7.5	94	138	4.8	130	28.9	10	1.7	55	2.2	2.7	15.5	38.4	1.4	0.231	0.2233	7.2226	7.7	0.2	0.1	158	18	67	16	2	0.2	32.3	34.6	93	16.4	3.09	75	1
1.6	7.34	12	23	8.8	109	108	3.7	140	26.2	8.8	3.1	29	1.8	4.4	10.7	27.2	0.9	0.72	0.36	4.86	6	0	1	208	8	93	16	2.8	0.2	37	33.4	111	17.7	2.37	48	0
1.6	7.38	15	13	7	114	80	2.8	139	29.2	10.7	0.6	8	1.5	1.2	13.2	34.2	1.2	0.549	0.122	4.27	6.1	0	0	162	11	31	16	2.2	0.4	33	36.5	91	14.9	3.23	35	0
1.6	7.37	29	13	8.4	93	64	5.2	130	38.7	11.9	11.3	84	2.2	5	61.9	68.8	7.7	2.678	3.296	14.626	20.6	0	0	385	13	160	15	2.8	0.2	29.5	30.9	96	16.8	4.05	50	0
1.6	7.28	21	22	8	102	213	4.5	140	31.6	10	3.9	53	3.1	4.5	18.6	33.6	1.7	0.903	1.505	27.692	30.1	0	0	306	10	179	15	2.7	0.5	28.6	31.8	90	18.3	3.52	76	0
1.6	7.47	13	31	10	104	100	3.7	144	30.8	10	1	15	2	4.1	12.8	22.5	1.1	1.7825	0.667	8.648	11.5	0.2	3.3	687	19	235	15	3.1	0.2	30.9	32.5	95	21.6	3.24	69	0
1.6	7.27	18	22	7.2	117	172	5.3	152	28.4	8.2	1.4	77	2	2.9	15.3	26.9	1.4	2.1312	0.288	11.8368	14.4	0.2	0.8	612	12	39	15	2.7	0.2	25.5	28.8	88	14.3	3.22	67	0
1.6	7.34	18	27	7.6	95	133	2.8	137	32.3	10.7	2.2	60	1.7	3.2	13.8	24.1	1.2	0.552	0.2484	26.7444	27.6	0.1	0.1	392	10	102	14	2.9	1	29.9	33.1	90	14.8	3.57	65	0
1.6	7.28	13	22	7.7	112	160	4.9	142	34.3	10.5	1	11	1.6	2.5	15	27.1	1.3	0.3476	0.2528	7.2048	7.9	0.3	1	291	6	88	14	2.2	0.4	27.2	30.7	89	17.2	3.87	82	0
1.6	7.31	12	25	8.8	106	172	4.4	139	35	11.8	1.6	24	1.7	2.2	13.6	35.5	1.2	1.188	0.1408	7.1808	8.8	0.2	3.2	121	10	70	13	2.9	0.8	28.9	33.6	86	14.5	4.07	72	0
1.6	7.41	21	24	10	97	147	3.6	138	29.9	9.8	9	62	2	5.6	13.4	32.1	1.2	2.052	0.657	6.183	9	0.4	0.8	198	11	131	12	3.4	0.3	27.9	33	85	18.8	3.53	64	0
1.6	7.4	12	28	8.8	103	216	4.1	139	30.8	10.4	1.2	26	2.2	3	18.9	40.5	2.3	1.5873	0.555	8.7579	11.1	0.3	1.5	208	14	95	12	3.5	0.6	30.3	33.9	89	13.7	3.45	64	0
1.6	7.26	15	23	9.5	106	100	3.8	140	29.6	9	2	38	1.5	5.9	13.2	36	1.1	0.9009	0.2016	5.0841	6.3	0.2	1.5	272	7	114	12	3.1	0.2	25.7	30.4	85	19.6	3.5	38	0
1.6	7.43	25	16	8.3	109	137	5.9	144	29.8	9.6	5.3	116	2.5	2.6	13.1	25.9	1.2	1.771	0.805	20.401	23	0.1	0	355	16	199	12	2.7	0.3	27.1	32.1	85	18.2	3.53	88	0
1.6	7.34	18	25	8.6	100	98	4.5	138	33	10.8	5.6	59	1.9	4.1	12.6	28.1	1.2	1.4878	0.43	6.5188	8.6	0.3	1.6	179	10	112	11	3.5	0.2	30.9	32.9	94	15.7	3.51	85	0
1.6	7.37	21	19	6	103	343	6.7	136	40.6	12.4	3.7	66	1.6	4.8	13.4	27.9	1.1	0.768	0.208	14.96	16	0.2	0.2	551	4	161	11	2.7	0.6	28.3	30.7	92	15.8	4.4	68	0
1.6	7.19	18	30	8	96	91	8.9	135	43.7	13.2	2.6	14	1.4	3.6	21.1	150	2.9	1.592	0.336	5.792	8	0.4	3.2	151	4	95	9	2.9	0.3	28	30.1	93	15.6	4.71	74	0
1.5	7.45	24	21	7.6	99	350	4.7	139	37.2	12.5	2.5	67	1.8	4.7	15.6	35.8	1.6	0.4712	0.2728	11.5816	12.4	0.1	0.5	223	1361	244	1760	2.8	2.9	33.4	33.7	99	13.9	3.75	60	0
1.5	7.47	17	22	8.8	113	95	5	147	27.6	9	1.7	71	2.2	4.5	15.4	30.2	1.4	1.5488	0.3072	10.7904	12.8	0.5	0.7	283	439	151	462	2.2	11.2	28.4	32.5	87	18.5	3.16	75	0
1.5	7.43	11	25	10.4	111	189	4.5	142	30.6	11.5	0.6	11	1.1	4.9	18.6	44.4	1.7	0.7728	0.3381	5.6649	6.9	0.2	1.5	126	145	44	320	2.6	2.6	32.7	37.5	87	16.7	3.51	50	0
1.5	7.38	9	19	6.6	113	124	4.1	137	41.6	14.3	2	20	1.5	2.1	14.3	47.6	1.2	0.808	0.2121	8.9486	10.1	0.2	1	197	138	172	219	2.4	1.1	35	34.3	102	14.1	4.07	41	0
1.5	7.42	14	22	9.1	104	88	4.4	136	32.5	11.7	0.8	18	1.5	3.2	14.2	35.1	1.4	0.44	0.176	3.12	4	0.23	0.96	73	138	144	194	2.9	2.3	37	36	103	14.8	3.16	52	0
1.5	7.29	13	23	8.2	105	157	4	137	26.8	8.5	0.8	45	2.2	3.7	19.6	28.8	1.8	0.603	0.2278	12.4352	13.4	0.2	0.8	374	54	287	147	2.8	0.4	24.6	31.8	77	19.4	3.46	76	1
1.5	7.32	19	16	9.9	100	169	3.9	131	39.3	13.3	1.3	20	1.5	2.6	12.1	24.6	1	3.996	1.184	0.74	7.4	0	1	166	303	106	132	2.2	1.7	31.8	33.9	94	17.4	4.18	57	1
1.5	7.34	16	22	7.5	107	114	4.6	140	31.9	10	3.1	57	1.7	4.5	13.3	30.2	1.2	0.87	0.4495	13.166	14.5	0.1	0	73	100	57	131	2.9	0.5	31	31.3	99	14	3.21	83	0
1.5	7.48	16	22	9.4	103	103	4.8	136	29.8	9.6	1.9	45	2.1	4.3	16.5	26.5	1.5	0.584	0.4745	6.132	7.3	0.5	0.9	241	22	65	128	2.9	2	29.9	32.3	93	14.1	3.21	80	0
1.5	7.34	17	20	8.8	132	231	3.1	166	31.5	10.1	1.9	77	2.3	2.6	15.9	29.8	1.4	0.74	0.29	3.815	5	0.3	2.7	109	127	165	122	2.9	0.2	33.7	32.1	105	14.9	3	64	0
1.5	7.45	12	31	8.7	94	192	5	132	27.2	8.4	0.7	13	1.5	3.1	13.1	22.4	1.1	2.1735	0.8855	12.9283	16.1	0.3	0.5	735	73	149	112	2.1	1.3	25.7	30.8	84	14.5	3.26	62	0
1.5	7.5	15	31	8	98	80	4.1	140	23.9	7.6	1.8	33	1.6	3.6	44.9	35.3	5	0.223	0.446	21.3188	22.3	0	1.3	292	73	149	112	2.9	0.4	25.3	31.9	80	20.4	3.01	65	1
1.5	7.38	13	25	8.9	103	90	6.2	135	35.9	12.5	1	23	2.1	2.6	13.9	29.3	1.2	1.111	0.704	9.141	11	0.2	0.2	250	73	149	112	2.2	1.3	30	34.9	86	13.6	4.18	86	0
1.5	7.3	16	20	8.2	104	140	3.4	137	31.4	10.5	0.5	14	1.9	3.2	25.2	150	2.5	0.66	0.39	13.92	15	0.1	0.1	318	73	149	112	2.9	1.3	31.3	33.6	93	17.5	3.37	55	0
1.5	7.53	10	29	8.1	107	125	4.2	142	32.1	10.3	0.6	15	1.9	2.8	12.8	28.1	1	1.39	0.139	9.313	13.9	0	1	191	73	149	112	2.9	1.3	28.2	32.1	88	14.2	3.64	64	0
1.5	7.26	16	30	8.6	95	124	6.4	135	31.7	9.2	4.5	36	2.3	5.1	14.8	28	1.3	0.8632	0.2808	9.1	10.4	0.4	1.1	312	27	239	111	3.2	0.5	32	29	110	23.3	2.87	63	1
1.5	7.46	16	22	7.4	101	125	4.2	135	30.1	10	0.9	24	2.2	3.7	19.4	38.1	1.8	1.182	1.773	16.745	19.7	0	0	388	54	73	103	2.6	2.4	31.9	33.3	96	14.1	3.15	83	0
1.5	7.48	15	24	7.3	104	282	5	138	28.1	9.7	0.9	68	2.7	3.5	13.9	29.2	1.3	1.3	0.65	30.225	32.5	0	0	118	76	266	92	2	6.5	33.9	34.6	98	14	2.87	70	1
1.5	7.33	12	24	8.7	99	143	4.2	131	30.6	10.5	1	15	1.7	2.3	14.1	26	1.2	3.41	0.44	6.38	11	0	2	13	69	65	73	3.2	1.2	33	34.2	97	16.1	3.17	63	0
1.5	7.3	14	23	7.3	97	121	4.3	130	29.6	9.5	2.9	46	2	5.8	20.4	49.8	2.6	0.512	0.128	5.44	6.4	0	1	233	42	100	69	3.1	0.2	27.3	32	85	15.4	3.47	71	0
1.5	7.17	20	29	8.6	90	213	5.3	134	28	8.5	1	16	1.6	3.5	12.9	25.2	1.1	2.3232	0.5808	13.728	17.6	0.6	4.9	417	31	173	65	3.2	0.7	24.7	30.5	81	14.9	3.46	63	0
1.5	7.23	23	13	8.1	104	90	4.8	135	34.6	10.9	4.6	59	1.9	5.1	49.3	32.7	4.9	0.567	0.0972	4.6656	5.4	0.2	1	35	45	206	62	2.9	1.6	25.8	31.3	83	15.7	4.2	30	0
1.5	7.54	16	21	7.8	113	107	3.7	146	28.6	9.4	1.1	92	2	4.9	19.8	38.8	2.6	2.8938	0.8374	6.3706	10.6	0.4	4.3	295	55	104	61	2.6	0.2	28.8	33	88	14.9	3.27	73	0
1.5	7.5	12	26	7.6	100	104	3.9	134	32.2	11.3	0.6	11	2.1	2.9	14.6	34.7	1.3	0.8496	0.3658	4.6138	5.9	0.8	0.4	65	38	45	56	2.3	0.7	29.8	35	85	13.5	3.78	26	0
1.5	7.32	20	26	9.2	96	154	3.8	138	36.8	13.1	1.4	18	1.4	3.7	11.8	21.2	1	1.7875	0.575	10.0125	12.5	0.2	0.8	245	55	85	50	3.8	0.6	32.9	35.6	92	13.8	3.98	76	0
1.5	7.34	20	29	9.3	88	78	7	130	32.2	10.8	0.8	18	2.7	3.5	12.2	27.5	1	0.369	0.041	3.567	4.1	0	0	106	32	159	48	2.3	0.4	33.7	33.6	101	14.4	3.21	51	0
1.5	7.41	16	27	8.3	102	125	3.2	142	31.6	10.7	0.8	25	1.3	4	11.7	21.7	1	0.52	0.04	3.44	4	0	0	156	19	56	46	3.6	0.6	27.1	33.7	80	17.8	3.94	64	0
1.5	7.37	12	28	10.6	99	117	5.4	134	38.8	13	1.2	34	2.6	2.5	13.3	33.9	1.2	1.674	0.744	15.624	18.6	0	1	379	19	108	44	3.8	0.2	32.4	33.5	97	14.8	4.03	67	0
1.5	7.43	13	31	8.2	102	87	4.8	141	40.9	13.1	0.8	20	1.7	2.8	14.7	150	1.4	1.4899	0.2209	2.7542	4.7	1.6	3.5	285	29	201	43	4	1.6	30.6	31.9	96	15.5	4.27	81	0
1.5	7.34	12	24	7.1	101	64	5.8	131	28.9	9	1.5	12	1.5	3.9	15.6	37.7	1.4	3.294	0.756	9.0855	13.5	0.6	2.1	616	45	500	42	2.9	0.2	29.8	31	96	15.2	3.01	40	0
1.5	7.34	13	28	8.4	101	106	4.1	138	26.4	9	0.8	26	2	3.6	13.4	29.8	1.1	1.44	2.88	0.06	6	0	0	10	12	96	42	3.5	0.6	29.9	34.1	88	14.4	3.02	76	1
1.5	7.38	14	28	8.4	102	168	4.5	139	45.2	15.7	1.8	23	1.8	3.2	14.2	29.5	1.2	0.6987	0.3973	12.5766	13.7	0.1	0	143	52	67	39	2.4	0.2	33.4	34.8	96	13.5	4.71	63	0
1.5	7.29	13	23	6.2	100	177	3.5	132	25.6	8.8	1.4	49	1.4	2.7	13.2	38.2	1.1	0.276	0.138	6.486	13.8	0	0	181	16	65	38	2.9	0.3	32.1	34.5	93	15.4	2.74	88	1
1.5	7.34	12	27	7.7	102	105	4.2	137	35.9	12.3	1.5	34	1.7	3.7	18.9	39.1	1.7	1.078	0.784	7.056	9.8	0	0	154	49	73	37	2.2	0.7	29.7	34.2	87	13.2	4.14	39	0
1.5	7.34	16	21	8.3	104	292	6.4	135	35.7	10.8	4.9	26	3	4.6	17.8	44.4	1.6	0.954	0.318	9.2962	10.6	0.2	0.1	319	14	71	37	2.6	0.3	27.2	30.1	90	16.6	3.96	66	0
1.5	7.43	12	23	8.4	112	192	4.1	143	29.1	9.7	1.1	71	3.2	4.4	43.7	40.2	4.7	1.6912	1.057	27.331	30.2	0.4	0	102	40	148	37	2.2	1.3	34.2	33.2	103	21.1	2.83	68	0
1.5	7.27	16	27	8.3	103	111	4.3	142	30.8	9.4	1.9	51	1.9	5.6	17	27.5	1.6	1.6704	0.58	9.2104	11.6	0.3	0.9	158	22	133	36	3.5	0.5	24.4	30.6	80	17.4	3.87	66	0
1.5	7.36	12	20	7.5	107	276	5.2	134	21.7	7	2.4	52	1.6	4.1	31.8	43.2	3.3	1.18	1.18	8.024	11.8	1	0	83	50	172	34	2.9	0.9	28.3	32.2	88	18	2.47	60	0
1.5	7.4	15	19	6.3	109	175	3.5	139	27.4	9.1	2.3	56	1.8	3.5	18.9	32	1.7	0.725	0.145	8.99	14.5	0	0	101	29	73	34	2.3	0.9	30.8	33	93.1	16.5	2.94	80	0
1.5	7.21	14	27	8.6	110	70	4.5	146	30.1	9.5	1.8	37	2.8	3.3	13.4	27	1.1	0.314	0.471	14.915	15.7	0	0	427	24	164	34	3.1	0.4	30	31.5	95	19.3	3.16	78	1
1.5	7.34	10	31	8.6	98	103	4.1	135	28.7	9.9	0.5	19	2.2	4.4	14	32.7	1.2	1.845	0.41	1.558	4.1	1	6	326	42	96	33	3.1	0.3	41.1	34.6	119	15.1	2.42	37	0
1.5	7.37	12	23	8	109	132	3.3	141	33.8	11.8	0.9	11	1.7	0.7	16	47.1	1.5	1.6219	0.7282	30.6175	33.1	0.3	0.1	248	23	95	31	2.9	1.8	31.8	35.1	91	14.6	3.72	80	0
1.5	7.3	20	17	9.6	102	174	3.8	135	40.6	13.2	0.5	4	1.2	4.2	15.2	41.1	1.5	2.1888	1.1172	8.0142	11.4	0	0.7	355	13	66	30	3.4	0.5	24.8	32.5	77	14.2	5.31	50	0
1.5	7.34	14	20	7.5	106	137	3.3	137	27.1	9.2	1.2	25	0.8	2	14.2	36.3	1.2	0.2262	0.2262	7.2852	7.8	0	0.8	261	29	50	30	2.9	0.2	26.8	34	79	11.8	3.43	72	0
1.5	7.28	12	25	7.2	106	85	4.2	139	27.2	8.7	5.8	31	1.8	6.3	15.8	36.3	1.4	0.9618	0.1218	0.8274	2.1	0.2	8.9	84	21	163	30	2.4	0.7	30.2	32	95	16.5	2.88	59	0
1.5	7.15	15	29	7	93	142	4.8	132	34.2	10.9	3	119	3.6	7.8	13.8	26.1	1.2	2.144	3.216	48.24	53.6	0	0	501	22	106	29	1.8	0.3	30	31.8	94	14	3.62	53	0
1.5	7.46	27	25	8.6	92	112	5	139	34.2	11.2	8.1	82	2	7.7	13.7	28.9	1.2	1.95	0.9	11.1	15	1	1	213	15	94	28	3.6	0.6	32.5	32.8	99	17	3.44	79	0
1.5	7.44	16	19	8.4	102	291	4.8	132	35.7	11.4	1	27	1.9	3.7	12.8	30.8	1.1	24.32	0.32	6.4	32	0	0	203	18	134	28	2.6	0.4	36.3	32.1	113	20.2	3.15	82	0
1.5	7.45	16	24	8.7	93	57	5.7	127	32.3	10	5.2	52	1.8	3.3	19.8	41.1	1.9	0.975	0.495	13.5	15	0.2	0.1	239	15	173	27	3.1	1.3	28.4	30.8	92	19.9	3.51	61	1
1.5	7.34	12	26	6.9	88	182	3.5	122	23	8.1	1.2	21	1.1	2.8	12.4	24.6	1.1	0.836	0.704	2.244	4.4	0	0	52	19	116	26	2.9	0.3	30.6	35	87	15.7	2.64	81	0
1.5	7.52	19	22	8.2	97	112	3.9	134	37.8	13.6	1.4	23	2.5	4.6	25.6	32.2	2.5	0.648	0.5616	5.9616	7.2	0.3	0.2	143	14	84	26	2.9	0.5	29.7	35.9	83	17.6	4.56	61	0
1.5	7.46	16	22	9	98	103	3.8	132	35.4	12.7	1.1	19	1.6	4.5	13.1	27.3	1.1	0.924	0.3696	6.552	8.4	0.23	0.96	270	69	93	26	3.3	0.6	29.8	35.8	83	13	4.26	52	0
1.5	7.31	17	25	8.1	98	110	5	135	29	9.5	1.7	26	1.5	4.5	12.3	27.5	1	0.2496	0.1248	7.0434	7.8	0.6	4.2	538	22	150	26	2.9	0.2	29.1	32.6	89	19.9	3.25	45	0
1.5	7.54	15	23	7.9	99	117	3.9	133	33.7	11.1	0.8	35	2.4	2.9	14.9	27.6	1.4	1.22	0.5002	10.309	12.2	0.5	0.8	268	46	46	26	3	0.3	32.3	33	98	13.7	3.44	52	0
1.5	7.54	15	24	7.8	106	182	4.3	141	43.2	14.8	1	20	1.9	3.4	17.4	150	2.1	1.53	0.441	6.282	9	1	7.4	186	26	149	26	2.9	1.3	30.8	34.2	90	13.2	4.8	81	0
1.5	7.37	9	28	7.5	107	85	3.4	141	27.3	8.9	0.4	19	1.8	3.2	12.9	28.8	1.1	1.4144	0.2652	4.9912	6.8	0.2	1.7	159	25	210	26	3	0.5	28	32.5	86	17.1	3.17	52	0
1.5	7.3	11	28	7	107	137	3.9	142	35.8	11.3	1.9	30	1.9	2.9	17.3	28.6	2.1	0.5123	0.2398	9.9626	10.9	0.2	1.5	124	29	84	25	2	0.3	32.9	31.6	104	17.3	3.44	78	0
1.5	7.32	21	22	8.1	94	73	6.5	130	26.6	8.9	6.5	71	1.6	5.6	15.5	34.7	1.6	1.008	0.336	6.888	8.4	0	0	192	13	71	24	3.1	0.3	35.5	33.7	106	19.1	2.52	61	0
1.5	7.43	13	29	9.8	102	96	4.4	140	38.2	13.5	0.4	17	1.4	3.2	12.5	24.4	1.1	3.648	0	0.192	6.4	0	0	100	27	209	24	2	0.5	32.1	35.4	91	19.4	4.22	50	1
1.5	7.14	10	8	10.7	111	130	6.7	122	57.8	17.7	3.1	53	1.9	4.9	18	38.1	1.6	0.235	2.585	20.68	23.5	0	0	153	21	99	24	3.4	0.6	27.6	30.6	90	17.1	6.42	41	0
1.5	7.45	13	31	9.1	104	199	3.5	144	37.5	10.9	2.8	7	1.8	1.8	15.2	42.8	1.3	1.0292	0.4731	6.7313	8.3	0.3	0.4	235	10	170	23	2.7	0.2	26.2	29	90	16.9	4.15	67	0
1.5	7.38	14	18	7.7	105	155	4.1	133	32.2	10.8	0.5	9	1.9	3	13	25.8	1.1	1.274	0.182	16.38	18.2	0	0	234	14	99	23	2.2	1.9	28.8	33.4	86	18.3	3.74	65	0
1.5	7.41	19	27	9.1	95	135	3.7	137	32	9.9	2.3	36	2	3.3	13.4	31.1	1.1	1.3886	0.6042	8.215	10.6	0.7	3	274	23	353	22	3	0.5	28.3	30.9	92	17	3.5	65	0
1.5	7.23	25	19	6.6	98	112	4.6	137	28.8	10.1	8.9	110	2.7	8.8	14.8	23.2	1.3	0.572	0.429	13.299	14.3	0	0	93	63	66	22	2.6	0.5	31.9	35.2	91	13.7	3.18	58	0
1.5	7.32	10	16	6.6	115	218	4.6	136	40.1	12.6	3	63	1.6	4.3	13.3	28.1	1.2	2.45	0.7	31.85	35	0	0	416	16	76	22	1.9	0.3	29.8	31.4	95	16.1	4.22	78	0
1.5	7.34	6	34	7.8	100	129	4	136	26.7	8	0.5	24	2.1	4.1	13.4	33.9	1.1	5.5335	1.054	8.804	15.5	0.7	0.1	467	22	70	21	2	0.4	25.7	30.1	85	16.2	3.13	80	0
1.5	7.33	13	26	7.5	104	73	5.5	137	38.9	12.9	0.6	19	1.3	2.2	12.8	27.2	1.1	2.5389	0.6231	6.0171	9.3	0.4	0.8	196	12	49	20	2.2	0.3	32.5	33.1	98	13.5	3.96	42	0
1.5	7.4	16	21	7.5	108	177	3.5	141	34.1	10.5	1.2	22	1.9	3.8	12.3	23.6	1	1	0.74	18.18	20	0.3	0.1	415	9	207	20	2.9	0.5	25.7	30.8	84	17.6	4.08	85	0
1.5	7.38	14	21	8.3	109	201	3.3	141	40.4	13	1.7	31	1.9	3.5	11.9	23.4	0.9	2.0178	1.1328	14.1777	17.7	0.5	1.5	275	11	69	20	2.6	0.7	27.1	32.2	84	14.9	4.8	45	0
1.5	7.25	19	23	11	100	116	4.2	138	49.6	16.1	2.6	53	2.7	5.3	12.8	23.6	1.1	0.5406	0.8058	8.7822	10.2	0.3	0.5	463	18	205	19	4.3	0.4	32	32.4	99	13.2	5.03	71	0
1.5	7.38	12	27	7.9	101	115	3.2	137	37	13.4	0.9	17	1.6	2.6	13.1	26.6	1.1	0.98	0.805	0.595	3.5	0	2	111	32	187	18	3.4	1.3	32.5	36.3	90	14.4	4.14	59	0
1.5	7.38	25	12	7.7	102	224	4.6	134	26.7	9.1	5.8	114	2.2	8	14.7	30.6	1.4	0.6776	0.3696	6.5912	7.7	0.3	0.6	205	14	113	18	3.6	0.5	28.9	34	85	15	3.14	56	1
1.5	7.27	14	23	8.7	105	111	4.4	138	29.9	10	2	41	1.3	2.2	15.1	26.3	1.3	0.676	0.338	14.534	16.9	0	0	220	15	69	18	2.8	1.3	28.4	33.5	85	17.5	3.53	69	0
1.5	7.31	22	8	9.4	119	190	7.4	142	37.7	11	5.4	87	1.3	4.2	14.6	37.2	1.4	0.544	0.352	2.24	3.2	0	0	293	17	218	18	4.1	0.2	27	29.1	93	15.3	4.08	68	0
1.5	7.32	13	29	8.5	100	148	5.2	137	33	10.8	1.3	24	2.1	2.9	12.9	21.4	1.1	5.319	0.197	13.396	19.7	0	2	432	4	83	17	3.2	0.3	30.1	32.7	92	15	3.59	71	0
1.5	7.42	14	24	7.9	101	150	4.5	134	23.3	8	5.4	55	2.5	5	16.4	32.4	1.5	0.8712	0.1782	2.2275	3.3	0.4	0.3	65	11	98	17	2.4	1	31.4	34.3	92	18.3	2.54	64	0
1.5	7.29	9	20	8.1	117	28	5.9	140	28.9	8.3	1.9	54	2	2.5	12.7	47.8	1.2	1.2862	0.218	9.3086	10.9	0.3	0.4	81	23	99	17	2.3	0.1	28.1	28.6	98	15.9	2.95	69	0
1.5	6.96	18	29	8.1	100	114	6.8	140	31.2	10.1	1.2	33	1.7	2.6	19.2	30	2.6	0.6174	0.5292	11.4156	12.6	0.1	0.1	204	12	84	16	3	0.7	28.5	32.3	88	13.2	3.53	64	1
1.5	7.51	16	26	7.4	103	126	4.5	140	30.5	9.5	1.2	28	1.3	5.9	13	24.4	1.1	2.101	0.8404	14.898	19.1	0.23	0.96	713	9	158	16	1.8	0.2	26.5	31.1	85	15.3	3.59	58	0
1.5	7.33	18	29	7.7	96	200	4.6	138	26.8	8.3	5	29	1.5	3.1	11.3	30.3	1	0.512	0.384	5.2736	6.4	0.6	2.9	214	11	210	15	3.1	0.2	30.5	31.1	98	16	2.74	67	0
1.5	7.41	14	27	9.8	94	142	4.3	131	35.5	11.7	2.7	69	2.1	4.2	25.2	37	4	0.2448	0.3456	13.7952	14.4	0.1	0.1	210	22	58	14	2.9	0.6	31	32.8	94	19.7	3.77	83	0
1.5	7.38	13	28	8.9	100	170	4	137	41.4	12.4	2.3	6	1.8	2.7	19.2	150	1.8	1.9832	0.3082	4.3483	6.7	0.2	0.7	200	13	116	14	3.4	0.4	27.3	29.8	92	17.5	4.52	66	0
1.5	7.39	11	30	9.4	107	114	3.8	144	31.3	9.4	0.5	14	1.2	3.7	12.2	28.7	1	1.677	0.3588	5.3118	7.8	0.1	5.7	286	23	302	14	2.9	0.2	25.5	30	85	17.6	3.68	40	0
1.5	7.06	21	21	6.3	110	170	5.2	147	31.8	9.6	3.2	82	1.5	5.4	17	31.6	1.9	0.321	2.247	26.643	32.1	0	0	462	13	86	14	2	0.1	29.7	30	99	14	3.22	81	1
1.5	7.34	19	22	7.2	99	129	3.4	137	26.3	9.2	3	23	1.4	2.1	14.9	33.3	1.3	1.335	0.4539	6.8975	8.9	0.1	2.3	398	11	146	13	1.9	0.5	33	35.1	94	20.6	2.79	64	0
1.5	7.36	16	24	8.7	98	107	3.3	135	22.4	7.2	0.9	33	2.1	3.8	14.6	30.1	1.3	2.1965	0.621	8.648	11.5	0.2	0.2	335	14	131	12	2.9	0.3	31.3	32.4	97	16.2	2.32	50	0
1.5	7.46	13	27	8.9	99	95	4.5	134	43.3	14.5	0.8	6	2	3.7	20.1	26.7	1.9	1.0244	0.6501	16.9814	19.7	0.6	4.7	270	12	61	12	3.4	0.7	29.8	33.6	89	11.4	4.87	42	0
1.5	7.41	16	21	8	108	88	3.2	142	22.8	7.9	1.5	34	1.8	3.1	14.8	29.2	1.3	0.5928	0.2451	4.5144	5.7	0.2	5.8	212	4	63	12	3.2	0.3	32.1	34.7	93	20.1	2.46	65	0
1.5	7.34	15	21	8.1	109	69	4.1	141	25.9	8.4	1.7	29	1.9	3.3	13.7	30.3	1.2	0.7008	0.192	3.6768	4.8	0.3	4.5	180	9	329	11	2.3	2.7	28.1	32.3	87	15.8	2.98	53	0
1.5	7.37	15	27	6.5	99	96	3.3	138	39.7	13.6	0.8	10	1	3.3	16.1	27.8	1.4	0.9296	0.166	15.4546	16.6	0.1	0.1	321	14	33	10	2.9	0.6	30.2	34.3	88	13.6	4.51	20	0
1.4	7.26	16	32	9.2	94	79	5.9	136	31.3	10	2	49	2.2	4.8	12.1	22.5	1	1.5741	0.4929	13.6422	15.9	0.2	0.9	443	5660	114	8638	3.6	0.7	29	31.9	91	14.9	3.44	75	0
1.4	7.28	17	15	6.8	104	125	5.4	131	40.9	14.4	2.5	72	2.6	6.9	26.1	35.6	2.7	1.45	0.58	12.47	14.5	0	0	228	1833	70	3322	3.2	2.4	32.2	35.1	92	13.9	4.47	43	1
1.4	7.36	16	19	8.1	101	88	5.2	131	38.1	12.8	1.7	66	2.1	5.4	13.9	37.2	1.2	0	0	5.51	5.8	0	0	55	366	105	482	2	0.8	31.9	33.6	95	16.8	4.01	67	1
1.4	7.37	15	27	8.8	95	123	4.1	133	37.4	12.6	1.4	21	2.6	3.5	38.4	44.1	4.1	0.7995	0.8815	18.737	20.5	0	0.4	251	206	266	476	3.6	2.7	32.2	33.7	96	16.7	3.91	85	0
1.4	7.4	16	20	8.3	106	252	4.8	137	31.7	10.2	3.1	40	2.2	3.8	19	150	1.8	1.408	1.2288	22.656	25.6	0.2	0.1	400	137	186	323	3.1	0.6	30.6	32.3	95	15.2	3.34	68	0
1.4	7.47	17	30	9.7	96	450	6.5	136	36.4	13.1	2.2	51	2.1	3.4	13.8	22.1	1.3	0.6987	0.2192	12.7136	13.7	0	0.4	196	55	67	275	3.5	0.9	32.4	36	90	12.5	4.04	76	0
1.4	7.14	12	16	5.7	117	142	4.1	141	28.8	9.5	0.9	14	1.2	2.5	15.8	38.9	1.4	0.231	0.077	5.236	7.7	1	1	110	126	199	251	2.7	1.2	33.7	33	102	13.8	2.82	46	0
1.4	7.17	24	13	6.6	108	142	4.9	140	33.2	11.2	6.1	116	2.2	9.2	16.4	37.9	1.5	0.4509	0.167	16.0654	16.7	0.1	0.1	208	85	108	197	2.3	0.2	27.6	33.7	82	16.8	4.05	75	1
1.4	7.44	14	27	6.9	91	93	5.2	127	25.4	8.6	0.8	34	1.6	3.3	12.3	35.9	1.1	1.5563	0.316	5.9961	7.9	0.1	0.3	229	151	159	156	2.4	0.5	29	33.8	86	16.8	2.96	76	0
1.4	7.28	8	24	5.4	117	89	2.8	146	36.1	12.1	0.8	27	1.1	2	15.1	32	1.4	0.24	0.048	0.416	1.6	0	0	184	125	70	126	1.6	1.7	30	33.4	90	15.2	4.02	71	0
1.4	7.31	15	17	7.2	101	246	3.3	130	33.9	11.3	2.2	44	2	3.7	16.1	32.2	1.5	0.6132	0.5694	42.5736	43.8	0.1	0	208	73	589	124	2.6	6	29.3	33.5	88	14.5	3.87	79	0
1.4	7.47	10	29	6.7	105	168	3.6	140	27.5	9.7	0.8	22	1.5	1.6	16.3	34.2	1.8	0.88	0.352	6.24	8	0.23	0.96	54	48	64	122	2.4	5.2	30.4	35.3	86	17	3.2	47	0
1.4	7.44	9	32	9.2	97	101	4.8	133	39.1	13.5	1.6	25	1.8	3.8	17.5	37.5	1.6	0.3132	0.2052	4.8654	5.4	0	0.3	64	55	135	115	2.9	2.9	35.5	34.5	103	16.7	3.8	54	0
1.4	7.23	15	25	9.8	96	114	6.7	130	34.1	10.9	2.3	33	2.5	7.9	13.5	53.6	1.2	1.368	1.71	14.022	17.1	0	0	466	73	149	112	2.9	1.3	28.5	32	89	16.5	3.82	60	0
1.4	7.34	20	22	10.4	98	115	5.2	135	37.8	12.5	0.8	16	1.7	3.7	21.7	30.2	3.4	2.304	0.4896	6.7392	9.6	0.2	0.6	332	73	149	112	3.5	1.3	32.3	33	98	12.7	3.87	68	0
1.4	7.41	15	29	8.7	98	126	4.6	137	34.2	11.2	0.9	32	2	3.7	15.7	36.4	1.4	0.2184	0.546	17.3446	18.2	0.3	0.2	492	73	149	112	2.9	1.3	29.8	32.7	91	15.8	3.75	84	0
1.4	7.43	23	17	8	101	229	5.3	136	29.2	9.4	0.8	25	1.3	2	12.5	28	1	0	1.41	21.855	23.5	0	0	400	73	149	112	2.5	1.3	24.6	32.1	77	18.1	3.81	47	0
1.4	7.5	9	32	8.4	101	120	4.2	138	32.3	10.9	0.5	14	1.9	3.1	14.3	29.4	1.3	1.2	0.48	8.2	10	0.7	0.5	381	73	149	112	2.9	1.3	32.1	33.6	96	19.4	3.38	83	1
1.4	7.42	14	26	6.2	107	150	3.3	144	31.9	10.1	2.5	27	1.9	3.3	13.9	24.6	1.3	0.697	0.4505	7.31	8.5	0.2	0.3	193	73	149	112	2.9	1.3	29.6	31.7	93	19.7	3.42	75	0
1.4	7.44	16	24	9.1	117	122	3.5	153	28.3	9.3	2.6	74	2.5	4.1	14.3	26.1	1.2	2.8078	0.4726	9.9246	13.9	0.3	4.8	393	73	149	112	2.8	1.3	29.5	32.8	90	15.8	3.14	64	0
1.4	7.4	15	24	9.2	103	129	5.4	137	25	8.6	1.6	17	2.1	3.9	12.5	21.8	1.1	1.056	0.198	0.814	2.2	0	0	46	42	59	98	3.1	1.6	29.5	34.5	86	17	2.92	69	0
1.4	7.08	21	7	8.8	115	121	5.5	137	33	10.3	1.7	80	2.2	6	29.3	48.3	2.9	1.386	0.198	8.019	9.9	0	2	81	81	248	95	3.8	14.5	29.4	31.2	94	20.5	3.5	67	0
1.4	7.34	15	19	7.2	109	87	3.5	139	36.4	12.2	1.2	12	1.7	2.4	17.6	88.5	1.7	0.324	0	2.736	3.6	0	0	86	57	127	88	3.4	3.5	30.6	33.6	91	12.3	3.99	59	0
1.4	7.23	23	21	7.5	99	137	6.4	137	27.6	8.9	4.7	98	2	8.8	12.6	26.7	1.1	0.125	0	11.5	12.5	0	0	169	29	100	84	2.6	0.7	26.5	32.4	82	17	3.37	63	0
1.4	7.51	16	22	7.5	99	134	3.7	133	35.4	13.3	1.9	23	2	1.6	14.6	31.3	1.3	0.528	0.12	7.32	8	0.1	0.3	119	74	56	77	3.3	0.8	31.4	37.5	84	13.3	4.23	52	0
1.4	7.58	11	28	8.9	117	119	3	153	27.9	9.1	1.5	62	2.7	2.3	23.7	42.9	2.3	0.32	0.192	5.76	6.4	0	1	39	37	57	73	2.4	2.2	28.7	32.5	89	16	3.16	54	0
1.4	7.34	17	31	7.7	85	190	3.8	129	42.5	14.7	1.4	24	2	3.4	15	28.2	1.5	0.702	0.234	16.614	23.4	0	1	183	27	607	66	3.1	2.1	27.3	34.5	79	17.7	5.36	84	1
1.4	7.49	7	41	8.4	95	113	4	139	22.8	7.3	1	50	2.3	3.5	23.7	51.3	2.4	0.384	0.5376	11.7632	12.8	0.3	0.5	209	74	256	65	2.1	0.9	29.4	32	92	16.9	2.49	80	0
1.4	7.44	14	24	7.7	99	77	4.4	133	41.4	14.3	1.3	31	1.8	4.8	13.3	24.6	1.2	1.809	0.603	17.286	20.1	0	0	197	100	55	59	3.1	1	31.4	34.7	91	15.8	4.57	72	0
1.4	7.32	13	27	9.7	105	104	3.9	141	35.4	11.8	0.8	20	2.2	2.9	13.3	35.6	1.1	0.3567	0.2214	3.4891	4.1	0.4	0.5	64	53	147	52	2.7	0.1	32.7	33.3	98	15.8	3.61	50	0
1.4	7.02	10	22	6.1	118	109	5	145	41.2	13	0.8	11	2	4.3	16	28.8	1.4	3.744	1.872	13.936	20.8	0	0	185	44	95	52	2.6	0.9	31.6	31.5	100	13.9	4.12	51	1
1.4	7.41	19	19	7.8	96	220	5.1	129	29.8	9.2	3.8	60	2.1	6.8	12.2	31.5	1.1	1.0045	0.2254	3.5231	4.9	0.5	2.5	107	32	138	51	2.8	0.5	28.9	31	93	15.3	3.2	80	0
1.4	7.36	19	23	7.8	99	122	4.1	137	37.8	13.6	0.7	11	1.7	3.3	13.1	31.3	1.2	5.2845	0.9555	13.065	19.5	0.5	0.5	371	24	280	49	2.5	1.7	34.1	35.9	95	14.1	3.99	52	0
1.4	7.33	15	22	7.3	102	100	3.4	136	32.9	11	0.8	22	1.3	2.8	17.4	46.6	2	0.432	1.152	12.528	14.4	0	2	284	57	256	47	3	1.4	30.1	33.5	90	15.5	3.66	76	0
1.4	7.44	15	20	8.1	121	143	4.1	152	27.2	8.8	1.7	57	2.8	4.1	14.8	42.8	1.3	0.6322	0.436	20.6664	21.8	0.2	0.1	762	43	180	47	2.7	0.4	28.5	32.2	88	15.8	3.08	59	0
1.4	7.4	22	18	8.1	90	112	4.5	125	33.4	11.2	0.7	10	1.7	2.5	13.9	36.7	1.2	1.599	0.1845	10.4427	12.3	0.2	0.4	344	51	88	46	3.3	0.2	26.1	33.6	78	15.8	4.3	70	0
1.4	7.09	16	20	8.1	108	139	4.1	140	37.6	12.5	1.1	35	1.4	3.2	15.9	112.7	1.7	0.152	0	12.464	15.2	0	0	136	13	246	46	2.9	3.4	31.1	33.2	94	14.8	4.01	63	1
1.4	7.34	20	21	8	97	134	5.1	133	45.3	14.7	2	13	1.9	2.9	14.7	31.8	1.3	3.346	0.98	9.422	14	0.4	1.4	173	15	50	44	3.8	2.8	26.5	32.4	82	14.8	5.53	62	0
1.4	7.35	11	34	8.8	98	192	5.1	138	29.8	9.6	0.8	28	2	2.8	11.1	27.8	0.9	0	0.315	4.095	4.5	0	1	189	48	541	43	3.5	0.2	31.9	32.3	99	17.7	3.01	58	0
1.4	7.09	16	24	8	101	172	4.8	136	31	10	2.7	44	2	7	13.1	29.7	1.1	2.0064	0.8976	5.6936	8.8	0.7	1.6	388	33	77	43	2.8	0.3	30.1	32.1	94	14.8	3.32	54	0
1.4	7.49	14	22	7.7	100	112	3.5	132	30.7	10.5	0.9	17	1.8	2.8	15	43.9	1.5	1.998	5.994	7.77	22.2	0	0	85	24	91	40	2.9	0.5	30.5	34.1	89	15	3.43	85	0
1.4	7.34	19	15	7.8	100	150	3.3	131	34.3	11.9	0.9	26	1.6	2	12.7	26.8	1.1	0.588	0.588	19.782	21	0.1	0.1	295	27	79	37	3.7	0.3	33.3	34.6	96	13.2	3.57	68	0
1.4	7.44	18	25	10	95	118	4.2	134	39.6	12.6	1.4	45	2.1	3.1	12.7	21.4	1.1	1.3716	0.762	10.0584	12.7	0.5	3.5	220	19	90	36	2.9	0.4	29.1	31.9	91	13	4.34	71	0
1.4	7.33	26	23	7	89	95	6.6	131	37.3	12.1	9.2	97	1.9	6	12.1	24.2	1	0.8505	0.3321	6.7068	8.1	0.3	2.5	293	30	223	35	2.7	0.5	31.5	32.5	97	17.8	3.86	80	0
1.4	7.47	21	24	8.9	102	142	3.8	143	41.5	14	1.7	108	2.5	4.6	14.7	25	1.4	1.3838	0.4301	16.8113	18.7	0.1	0.2	218	17	78	35	2.7	1.5	28.4	33.7	84	14.4	4.94	78	1
1.4	7.5	16	29	9.3	92	67	3.4	134	28.8	9.4	3.5	36	2.6	2.9	13.2	25.3	1.1	0.087	0.464	1.856	2.9	2	2	609	18	71	34	3	0.2	26.3	32.6	81	13.6	3.56	29	0
1.4	7.35	17	25	9.1	101	112	4.6	138	31.3	10.5	2.6	67	2.5	4.5	15	33.8	1.3	1.12	0.07	2.87	7	1	36	132	31	255	34	2.5	0.7	31	33.6	92	21.5	3.4	64	0
1.4	7.34	14	25	9.3	102	133	4	137	38.5	12.5	0.7	15	2.1	4	15.5	29.4	1.5	1.3572	0.8874	15.0336	17.4	0.5	0.3	350	55	54	34	3.6	2.5	31.9	32.6	98	13.8	3.93	52	0
1.4	7.34	11	30	8.1	104	130	3.8	141	31.3	11	0.4	15	1.6	2.2	13.1	24.1	1.1	4.41	0	0.045	4.5	0	0	34	41	240	32	2.7	0.4	34.1	35.2	97	21.7	3.24	50	0
1.4	7.46	16	23	6.9	104	102	3.6	139	33.5	11	3.3	26	1.6	4.3	12.7	23	1.1	2.0418	0.4428	9.6186	12.3	0.2	1.4	496	13	138	31	3.1	0.3	30.6	32.8	93	19.4	3.58	50	0
1.4	7.44	14	27	9.3	104	96	4.4	141	42.8	15	1.1	17	2	2.5	12.7	30.6	1.1	3.2984	0.868	8.06	12.4	0.4	0.9	164	16	115	31	4	0.6	34.2	35.1	98	14.2	4.38	66	0
1.4	7.43	12	29	7.7	111	302	4	148	31.6	10.5	1.1	22	2.3	2.1	13.6	28.2	1.2	1.1242	0.219	12.9502	14.6	0.2	1.9	264	26	124	31	2.8	0.2	30.5	33.3	92	14.2	3.46	50	0
1.4	7.43	11	27	6.7	98	106	3.5	132	33.6	11.4	0.5	19	1.6	3	12.8	37.5	1.1	0.8372	0.4368	16.9078	18.2	0.1	0.1	427	16	49	30	1.9	0.3	28.8	33.9	85	17.1	3.95	73	0
1.4	7.37	11	28	7.4	102	109	3.2	138	24.4	7.2	2.4	10	1.4	3.9	13.5	36.2	1.3	2.8764	0.3366	6.5382	10.2	0.4	4	830	19	158	30	2	0.1	31.5	29.4	107	16.1	2.28	42	0
1.4	7.36	16	24	8.5	97	129	4	133	28.9	9.9	1.1	29	1.7	4.1	13.2	29	1.2	0.372	0.248	4.96	6.2	1	0	262	17	90	29	3.3	0.4	28.2	34.1	83	16.8	3.49	62	0
1.4	7.45	15	29	8	101	104	2.9	142	32.3	10.9	5	34	1.9	4.2	13	24.2	1.1	0.208	0.208	9.464	10.4	0	0	278	24	65	28	3.8	0.3	30.2	33.9	89	15.7	3.62	35	0
1.4	7.34	11	29	8.7	106	169	3.9	142	29.5	8.6	2.2	43	1.5	3.1	39.4	42.4	3.9	0.732	0.976	20.252	24.4	0	0	230	19	161	28	3.4	0.4	30.2	29.2	103	19.5	2.85	78	0
1.4	7.26	12	29	8.6	104	204	4.2	141	37.6	11.1	1.5	39	2.5	4.6	12	27.5	1	1.58	0.31	7.71	10	0.4	3.6	222	13	73	27	2.6	0.2	26.9	29.6	91	15.1	4.13	80	0
1.4	7.4	13	25	7.8	112	110	5.1	138	28.3	9.3	0.6	17	1.9	3.6	17.8	37.7	1.7	0	0.304	6.384	7.6	0	0	464	13	73	27	2.3	0.6	27.5	32.9	84	15.8	3.39	80	0
1.4	7.34	16	17	6.8	111	146	4.2	140	41	14.3	1.6	28	2	2.3	54.9	38.1	6.4	0.945	0.525	33.355	35	0.1	0.2	279	31	79	26	3.5	0.7	31.6	34.9	91	14.4	4.53	68	0
1.4	7.26	18	13	7.9	110	230	4.4	137	31.5	9.5	3.2	70	1.6	4.6	14.9	26.7	1.4	0.4316	0.2822	15.8696	16.6	0.1	0.1	277	11	52	24	3.3	0.3	30.3	30.2	100	15.1	3.15	76	0
1.4	6.98	21	11	9.9	111	102	6	137	40	11.8	3.4	17	1.9	6	34.1	34.3	3.4	1.0366	0.2769	5.6374	7.1	0.3	1.8	327	23	174	24	3.2	0.2	33.2	29.5	113	14	3.55	66	0
1.4	7.24	18	15	5.8	113	76	4.1	142	26.6	9.5	2.4	47	1.7	3.6	14.5	33.4	1.5	1.674	1.86	13.02	18.6	0	0	162	25	157	24	1.9	1.8	30.6	35.7	86	14.9	3.11	77	0
1.4	7.26	16	24	7.5	101	144	4.5	136	31.5	10.2	1.5	26	1.4	3.6	15.5	31.4	1.4	0.3534	0.2697	8.5932	9.3	0.1	0.8	321	24	125	23	2.4	0.5	27.4	32.3	85	13	3.71	62	0
1.4	7.41	17	20	7.8	112	65	4.6	144	35.5	11.9	1.5	29	2	3.4	15.7	30.2	1.4	1.8786	0.372	16.2936	18.6	0.1	0.2	409	13	136	23	2.1	0.9	31.2	33.4	93	16.5	3.81	85	1
1.4	7.34	14	23	7.8	103	85	3.5	136	33.7	11.9	0.7	9	1.2	3.9	14.3	31.1	1.2	0.704	0.304	14.368	16	0.2	3.7	314	12	57	21	3.1	0.7	36.8	35.4	104	12	3.23	66	0
1.4	7.06	18	12	8.4	114	169	6.6	137	27.6	8.5	4.4	120	2	5.3	83.2	56.6	8.5	0.9794	0.1411	7.0301	8.3	0.2	1.7	120	14	96	21	3.3	0.3	30.3	31	98	16.8	2.82	85	1
1.4	7.44	18	17	7.3	114	80	4	145	33	10.7	3.7	61	0.9	3.5	21	33.6	2.8	0.4173	0.1638	3.2565	3.9	0.3	1.4	171	10	63	21	3.7	0.7	32	32.3	99	14.8	3.33	74	0
1.4	7.34	17	24	9.7	95	298	4.1	132	37.2	13.1	0.9	15	1.8	3.4	13.8	28.8	1.2	1.276	0.696	9.396	11.6	0	1	338	16	55	19	4.1	0.6	30.8	35.3	87	14	4.26	66	0
1.4	7.37	20	17	9	99	126	4.8	131	31.3	10.9	2.1	83	2.4	6	14.2	32.1	1.3	0.2	0.02	0.14	0.5	0	0	200	15	53	19	1.6	1.3	31.1	34.8	89	16	3.51	77	0
1.4	7.49	14	30	8.3	96	94	4.2	136	29.1	9.2	6	21	2.3	2.5	16.2	27.1	1.5	0.462	0.1848	3.276	4.2	0.23	0.96	230	9	142	18	3.1	0.2	32.1	31.6	102	19.6	2.86	37	0
1.4	7.44	14	28	9.2	101	111	4.1	139	37.1	11.5	0.5	17	2.2	4	11.6	33.5	1.1	0.9416	0.2288	7.1368	8.8	0.1	5.5	241	11	67	18	3.6	0.4	30.5	31.1	98	16.7	3.79	67	0
1.4	7.34	14	19	7.7	109	120	3.8	138	26	8.2	3.6	54	1.6	4.7	19	56.6	1.8	0.03	0.09	2.76	3	0	0	23	24	61	18	2.6	0.7	28.7	31.5	91	15.6	2.86	54	0
1.4	7.36	14	33	8.5	92	123	4.9	134	35.2	11.2	0.9	42	2.3	2.8	16.1	32.4	1.4	0.32	0.96	8.64	16	0	0	390	15	114	17	2.6	0.3	30.4	31.7	96	17.1	3.68	51	0
1.4	7.34	12	26	7.8	101	115	4.3	135	27.3	9	0.8	16	1.7	3.4	13.9	29.1	1.2	0.4736	0.1472	5.6896	6.4	0.1	1.2	138	13	50	17	2.6	0.3	29.8	32.9	91	16.6	3.01	69	0
1.4	7.4	16	31	10.1	105	142	3.8	148	30.6	9.9	1.7	14	2.3	3.3	13.9	24.7	1.2	0.084	0.063	1.743	2.1	0	1	312	18	63	16	4.1	0.3	30.5	32.5	94	16.9	3.26	56	0
1.4	7.3	16	14	7.5	117	183	4.6	142	25.7	8.5	3	97	2	4.8	23.8	41.2	3.8	0.7955	0.2035	17.39	18.5	0.1	0.4	134	17	70	16	2.8	0.7	31.4	33	95	18.7	2.69	83	1
1.4	7.52	11	27	6.7	108	67	3.4	143	29.3	9.6	1.9	19	2.3	1.9	13.7	27.8	1.2	1.0112	0.3456	4.5696	6.4	0.3	7	263	9	100	15	1.9	0.4	31.5	32.9	96	20.6	3.06	65	0
1.4	7.3	18	23	7.8	92	34	3.4	130	29.1	8.8	1.9	39	1.5	4.1	17.8	36.8	1.6	1.692	1.504	15.604	18.8	0	0	226	13	105	14	3.2	1.2	21.8	30.2	72	16.9	4.02	38	0
1.4	7.34	21	26	7.9	95	127	3.4	139	30.2	9.9	2.8	14	1.8	2.7	13	38.5	1.1	0.2912	0.1232	10.7296	11.2	0	0.5	361	9	144	12	2.2	0.2	28.8	32.8	88	16.9	3.45	66	0
1.4	7.34	12	22	7.4	97	79	3.2	128	31.9	11.6	1.3	32	1.7	3.1	14	28	1.2	1.1072	0.6747	15.3624	17.3	0.1	0.8	383	16	55	12	3.2	0.4	31	36.3	85	12.3	3.74	57	0
1.4	7.46	12	25	7.5	110	98	4.3	143	32.9	11.2	1.2	23	1.6	3.6	14.3	22.3	1.4	0.428	0.214	9.416	10.7	0	0	305	9	103	12	3	0.1	33.6	34.1	99	19.5	3.33	58	0
1.4	7.14	23	19	9.8	96	269	6.6	131	38.8	11.6	7.4	59	2.1	5.7	17.3	34.6	2.1	1.584	1.188	8.976	13.2	0	5	352	2	279	11	3.3	0.1	28.5	29.9	95	17.7	4.07	42	0
1.4	7.25	10	33	8.8	102	135	4.2	141	28.7	8.9	0.4	18	2.2	3.3	13.7	29.7	1.3	0.6298	0.4422	12.1806	13.4	0.2	0.9	282	12	73	11	2.8	0.2	27.2	30.9	88	16	3.26	54	0
1.4	7.24	9	32	9.3	104	111	5.3	140	35.6	11.3	1	24	2	3.8	19.1	28.7	1.8	2.163	0.357	7.959	10.5	0.1	0.1	177	5	78	11	2.3	0.5	27.9	31.8	88	16.9	4.06	86	1
1.4	7.34	16	21	7.6	105	166	3.7	138	26	7.8	1	38	1.8	2.5	13	22.1	1.1	0.36	0.48	14.145	15	0	0.1	264	5	60	11	3.1	0.2	20.5	30	68	18.2	3.8	64	0
1.4	7.42	10	25	7.2	107	115	2.5	139	24.9	8	0.7	13	1.6	2.1	19.1	55.5	1.7	1.1011	0.4914	7.2982	9.1	0.3	1.9	411	5	60	11	1.3	0.3	26.5	32	83	19.4	3.01	68	0
1.4	7.23	14	23	6.3	109	272	5.4	141	32.6	10.8	1.5	37	1.2	2.7	13.8	22	1.2	3.3264	0.2376	4.8928	8.8	0.2	3.7	254	12	57	10	2.8	0.5	29	33.3	87	13.2	3.74	72	0
1.4	7.44	12	26	7.6	107	132	3.6	141	27.7	9.6	1.2	38	1.7	1.2	14	27.5	1.3	0.294	0.588	8.526	9.8	0	0	185	6	129	7	1.7	0.3	32.2	34.6	93	15.2	2.98	64	0
1.4	7.48	13	26	6.9	107	133	3.9	142	34.1	10.3	0.7	18	1.6	3.3	27.8	108.4	5.1	0.9116	1.032	15.1704	17.2	0.1	0.5	409	11	54	7	2.8	0.6	26.3	30.3	87	16.1	3.92	61	0
1.4	7.34	8	33	4.3	105	80	4.6	141	28.7	8.9	0.6	8	1.1	2.5	27	49.5	4.8	0.452	0.565	9.379	11.3	1	4	453	4	27	5	2.2	0.2	29	31	94	16	3.07	61	0
1.3	7.46	14	28	9.5	106	185	3.4	145	35	12.1	0.7	15	1.7	4.1	17	76.6	1.9	1.254	0.5016	8.892	11.4	0.23	0.96	114	455	61	522	2.5	16.2	30.5	34.7	88	17.1	3.98	48	0
1.3	7.29	14	26	7.6	102	173	2.9	139	37.3	12.4	0.7	13	1.3	3	14.7	33.6	1.3	0.624	0.408	22.896	24	0.1	0.2	199	448	85	510	2.9	1.2	33.3	33.1	101	14.2	3.72	80	0
1.3	7.43	17	21	8.2	103	207	5.8	135	40.9	13.5	1.4	20	1.4	4.2	13.2	22.9	1.1	1.4994	0.7038	12.9744	15.3	0.2	0.6	204	142	64	157	2.9	1	32.4	33.1	98	12.7	4.17	74	0
1.3	7.41	15	23	7.3	140	144	4.6	173	45.2	13.8	2.7	73	2.6	2.6	56	43.9	5.6	1.624	0.464	9.164	11.6	0	1	190	139	77	128	3	0.4	28.6	30.6	94	14.4	4.83	67	0
1.3	7.31	17	27	7.4	102	214	6.2	140	40.1	12.5	0.8	29	1.6	2.3	26.7	31.2	2.6	0.912	2.432	27.056	30.4	0	0	252	73	149	112	2.9	1.3	22.3	31.2	72	16.2	5.61	65	0
1.3	7.39	13	23	7.2	105	120	3.6	137	42	14.9	1.1	22	1.8	2.4	12.3	20.1	1.1	0.544	0.352	5.4208	6.4	0	1.3	171	73	149	112	2.9	1.3	32.7	35.6	92	12.9	4.57	62	0
1.3	7.41	20	23	6.8	109	132	6.9	145	20.7	6.5	8	74	1.5	4.4	15.6	35.8	1.4	1.1316	0.3404	2.9072	4.6	0.2	4.6	209	73	149	112	2.3	1.3	29.3	31.5	93	17.5	2.23	65	0
1.3	7.28	22	17	6.9	94	284	4.1	129	29.7	10.2	5.9	54	1.8	7.3	15.8	35.4	1.4	1.666	1.19	18.326	23.8	0	1	305	55	119	111	2.5	0.9	28.7	34.1	84	15.5	3.54	54	0
1.3	7.48	6	18	11.4	94	77	5.5	112	38	12.7	0.9	26	1	2.3	16.6	36.4	1.5	1.652	0.644	11.634	14	0.2	0.3	58	47	160	107	3.3	4.2	31.8	33.5	95	21.4	4	50	0
1.3	7.39	10	34	9	97	124	4.3	137	29.5	9.9	0.8	50	2.1	3.3	13.4	47.8	1.2	3.825	1.53	19.38	25.5	0	0	317	149	162	107	2.7	0.8	30.1	33.5	90	14.9	3.3	73	1
1.3	7.4	16	20	9.1	111	110	4.6	142	31.1	9.6	3.1	82	2.5	4.6	13.4	45.2	1.1	0.3825	0.22	1.84	2.5	0.3	1.9	77	71	243	72	2.9	0.8	33.9	30.9	110	18.4	2.84	76	1
1.3	7.39	12	30	7.8	98	320	4.1	136	33.7	10.5	1.9	62	3.2	4.1	19.8	40.2	1.8	1.9012	0.388	7.2071	9.7	0.3	1.8	249	30	100	66	2.6	0.9	28.1	31.3	90	17	3.75	68	0
1.3	7.36	12	27	7.5	103	119	4.1	138	37.4	12.5	0.9	22	1.1	2.2	12.8	30.3	1.1	1.8876	0.2684	2.1604	4.4	0.7	1.3	435	70	113	62	3	0.5	31.6	33.3	95	16	3.95	52	0
1.3	7.03	31	15	9.6	103	231	5.4	144	46.9	13.4	1.2	16	1.8	5.7	13.2	20.5	1.1	5.352	1.784	12.042	22.3	0	2	327	13	184	55	2.9	0.4	28.7	28.6	101	14.3	4.67	73	0
1.3	7.32	12	23	8.3	111	124	4.2	142	31.4	9.7	1.9	43	2.1	3.4	15	43.7	1.3	0.384	0.3072	8.8608	9.6	0.1	0.5	88	59	242	55	3.1	1.3	33.6	31	108	19.7	2.9	76	1
1.3	7.43	14	30	8.3	87	93	4.7	126	33.1	10.6	1.4	45	2.3	3.7	19.9	64.7	1.9	1.7493	0.882	11.9364	14.7	0.3	0.6	411	16	304	47	2.9	0.6	29	32.1	91	15.8	3.66	66	0
1.3	7.5	15	26	7.9	102	108	3.9	139	43.7	15.2	1.3	18	1.6	2.4	14.6	33.1	1.4	0.7105	0.1666	3.9641	4.9	0.5	0.7	182	24	53	47	3.5	0.5	30.8	34.8	89	13.5	4.94	73	0
1.3	7.34	13	28	6.9	103	111	4.5	139	39.3	13.9	1.3	18	2.3	3.1	19.2	30.2	1.8	0.588	0.588	11.907	14.7	0	0	191	53	157	44	3.1	1.9	29.3	35.5	83	13.9	4.75	79	0
1.3	7.46	13	23	8.3	104	123	4.2	136	33.8	12.1	1.1	22	2	2.2	17.4	37.3	2.1	1.1	0.44	8.42	10	0.2	0.2	159	28	74	42	3.3	1.5	33.6	35.6	94	14.5	3.58	74	0
1.3	7.39	12	30	9.1	99	115	4.4	137	29.3	10.6	0.6	17	1.9	2.9	12.8	29.8	1.1	0.36	0	0.58	1	0	0	47	90	119	41	3	0.4	33.3	36.1	92	23	3.17	50	0
1.3	7.12	35	23	10.3	85	1131	7.6	123	30.8	9.6	4.2	82	3.1	11.8	13.4	97.7	1.1	5.3095	0.6216	19.8135	25.9	0.4	0.2	878	77	1324	40	4.3	0.4	32.6	31.2	104	18.3	2.95	38	0
1.3	7.42	32	6	6.8	106	127	5.8	138	31.9	10.4	12.9	181	2.2	9.3	13.2	27.3	1.2	0.4464	0.248	24.056	24.8	0.1	0.2	398	25	49	40	3.3	0.2	33.8	32.5	104	13.1	3.07	70	0
1.3	7.32	13	27	9.1	109	81	3.9	145	33.5	9.9	3.2	7	2	3.7	16.4	37.4	1.8	0.8733	0.2911	5.8788	7.1	0.4	0.3	172	17	111	37	2.1	0.5	29.2	29.5	99	18.7	3.38	61	1
1.3	7.3	13	26	10.2	105	89	5	139	24.7	8.9	1.1	44	2	4.8	15.2	29.1	1.3	0.6	0.04	0.8	2	0	10	27	44	89	36	3.8	0.9	30.4	36.1	84	14.2	2.94	69	0
1.3	7.34	12	34	9	110	40	4.1	152	28.2	8.7	1.7	80	2.2	3	11.5	28	1.1	0.7296	0.5244	10.1118	11.4	0.1	0.1	136	30	104	36	3	0.2	27.2	30.8	88	19.6	3.2	83	0
1.3	7.53	12	28	9.5	123	137	2.4	160	34.5	11.1	0.8	22	1.8	3.4	15.5	31.2	1.4	0.91	0.518	12.39	14	0.3	1	297	32	129	35	2.1	0.3	31.2	32.2	97	16	3.56	64	0
1.3	7.29	13	24	8.9	102	50	4.4	135	36.5	10.6	1.4	32	2.4	3.7	32.7	49.6	3.3	1.207	0.5538	12.3114	14.2	0.4	0.4	335	18	189	33	3.1	1.3	25.7	29.2	88	18.7	4.14	67	0
1.3	7.34	12	23	7.6	112	85	3.5	143	31.6	10.3	0.8	15	2.2	3	15	37.4	1.3	1.323	0.637	2.646	4.9	0	3	73	10	168	33	2.8	0.6	32.7	32.7	100	16	3.16	67	0
1.3	7.36	16	29	9.1	98	168	5.7	137	42.5	14.4	2.8	35	1.7	3.2	14.6	25.8	1.3	0	0.6	10.2	12	0	0	89	25	205	32	3.5	0.4	32.2	33.9	95	14.4	4.48	75	1
1.3	7.36	8	24	8.7	111	116	4.8	138	26.6	8.8	2	57	1.7	1.9	12.3	23.9	1	1.19	0.35	5.46	7	0	0	377	13	182	32	2.3	0.1	38.4	33.2	116	17.1	2.3	48	0
1.3	7.37	19	16	8.8	109	125	4.3	140	44	14.2	1.9	37	1.7	3	13.4	28.1	1.2	1.518	0.506	8.778	11	0.7	1.2	194	16	113	31	3.4	0.8	24.8	32.2	77	16.8	5.73	81	0
1.3	7.39	11	26	8.6	103	84	4	136	31.7	10.5	0.9	30	1.6	3.2	14.1	33.3	1.2	2.763	15.964	9.824	30.7	0	0	95	72	89	30	3.7	0.7	32	33.2	96	15.3	3.29	86	0
1.3	7.34	15	22	8.5	111	145	2.8	145	37.4	11.9	1.8	106	2.1	3.2	12.8	29	1.1	0.5628	0.7504	25.4064	26.8	0.2	0	66	23	276	30	2.9	1.2	29	31.9	91	17.6	4.11	69	1
1.3	7.34	14	25	8.9	111	205	3.9	146	23.3	7.8	1	35	2.4	1.9	13.1	32.4	1.1	2.912	0.728	1.848	5.6	0	0	185	24	91	30	3	3	33.3	33.4	100	15	2.34	73	0
1.3	7.43	21	12	7.7	129	507	4.4	158	24.5	7.6	3	85	2.1	2.8	16.5	29.6	1.8	0.915	0.549	16.836	18.3	0	0	149	19	255	27	2.7	0.2	28.4	30.9	92	16.4	2.66	88	0
1.3	7.2	11	31	8.9	97	156	4.9	134	25.3	8.4	0.7	24	2.2	5	14.1	24.1	1.3	0.225	0	3.015	4.5	0	0	85	23	168	24	2.2	0.9	28.7	33	87	16.9	2.92	43	1
1.3	7.38	11	28	9.1	100	114	4.5	134	35.6	12.1	1	15	2.2	2.6	15.2	40	1.4	1.43	0.676	10.79	13	0.1	0.8	175	24	134	24	3.4	1.6	30.5	34	90	21.4	3.97	83	0
1.3	7.27	15	21	8.8	105	117	4.9	136	38	12.6	1.7	43	2.2	3.8	13.8	41.1	1.2	2.1924	0.4959	5.5767	8.7	0.3	4.7	281	13	96	24	3.5	0.3	30.4	33.1	92	13.9	4.14	83	0
1.3	7.38	16	37	8.6	92	142	4.6	140	28.9	9.2	1.5	61	2.2	3.7	14.3	31.5	1.3	0.8177	0.4862	20.7298	22.1	0.1	0.2	244	23	82	23	3.9	0.5	29.4	31.8	93	14.6	3.12	51	0
1.3	7.46	18	25	10	100	124	4.5	138	26.4	8	2.4	44	1.5	3.5	16.1	27.9	1.5	1.5476	1.2084	18.1684	21.2	0.2	1.1	156	14	133	23	2.9	0.3	29.7	30.4	98	16.3	2.7	59	1
1.3	7.38	10	24	7.2	115	92	4.7	144	29.5	9.4	0.8	13	1.7	2.9	17.3	35.6	1.9	0.4531	0.1587	1.6192	2.3	1.8	1.2	60	10	53	23	3	0.4	24.2	31.9	76	16.1	3.89	81	0
1.3	7.39	15	26	8.2	106	86	7.3	140	30.7	9.5	4.1	131	2.1	5.4	13.1	26.3	1.1	0.1702	0.111	7.1188	7.4	0	0	203	17	83	22	3.2	0.7	29.7	30.9	96	17.7	3.19	60	0
1.3	7.18	23	15	9.6	107	53	3.6	141	30.8	10.5	6.2	55	1.8	6.8	14.9	31.9	1.3	2.6703	0.5676	9.4041	12.9	0.1	2	527	11	96	22	3.3	0.4	29.5	34	87	17.7	3.55	70	1
1.3	7.45	14	28	9.4	97	87	5	134	27	8.9	2.7	56	2.7	4.5	16.4	26.1	1.5	0.27	0.486	4.644	5.4	0	0	99	14	112	21	4.2	0.5	29.8	32.9	90	19.1	2.99	63	0
1.3	7.33	10	37	8.8	99	253	4.2	142	33.4	11	1	42	2.2	2.8	13.5	24.4	1.2	0.4181	0.2368	2.96	3.7	0.5	1.7	83	22	110	21	3.3	0.2	33.4	32.9	101	14.3	3.3	65	0
1.3	7.44	15	23	9.8	109	109	3.9	143	37.9	13.2	0.7	22	2.2	2.7	12	32.5	1	0.871	0.299	11.791	13	0.2	0.2	213	15	79	21	4.1	0.3	35.6	34.7	102	13.6	3.7	46	0
1.3	7.34	13	26	8.4	101	139	4.2	136	33.7	11.1	0.5	13	2	3.3	12.8	28.7	1.2	0.3075	0.195	6.945	7.5	0.3	0.5	212	13	55	20	3.4	0.6	31.5	33	95	15.7	3.53	67	0
1.3	7.59	13	28	10.1	109	163	4.5	145	26.5	8.7	3.7	29	2.1	3.6	22.5	34.7	2.1	1.0961	0.9118	7.3235	9.7	0.7	3.1	257	10	100	20	2.6	0.4	30.1	32.9	92	15.2	2.89	72	0
1.3	7.41	12	18	7.3	120	73	5.2	145	30	10.1	1.2	42	2.1	4.3	13.9	32.2	1.2	0.36	0.6	4.86	6	0	0	13	4	87	19	1.7	0.6	30.5	33.5	91	16.3	3.3	70	1
1.3	7.2	28	18	8.3	98	183	5.2	139	23.3	7.6	19.7	144	1.9	13.3	15.6	29.1	1.7	1.4175	0.459	11.475	13.5	0.1	1	275	15	139	18	2.9	0.3	29.6	32.8	90	16.1	2.58	50	1
1.3	7.45	12	33	9	100	220	3.3	142	29.1	9.2	4.1	34	1.6	2.9	18.1	150	2.2	0.819	0.26	5.2325	6.5	0.2	2.8	255	10	109	18	3.1	0.2	30.4	31.6	96	16.8	3.03	58	0
1.3	7.5	12	34	8.7	101	160	3.8	143	36	12	1	43	2.2	4.4	11.7	21.6	1	1.1	0.44	7.8	10	0.23	0.96	255	21	89	17	3.2	0.5	29.8	33.4	89	17	4.03	72	0
1.3	7.49	11	24	9	103	101	4.4	134	33.1	10.9	1.1	26	1.8	3.8	14.6	37.6	1.3	1.829	0.6608	9.0624	11.8	0.4	1.6	408	13	130	17	3.1	0.7	29.2	33	89	17.8	3.74	78	0
1.3	7.34	15	21	8.2	104	138	4.1	136	35.4	12.4	1.9	38	2.2	2.8	13.6	35.1	1.2	0.2	0.2	8.3	10	0	3	180	21	848	17	3.3	3.1	31.5	34.9	90	15.3	3.92	54	0
1.3	7.4	15	28	9.6	98	95	4.1	137	25.2	8.4	1.8	28	2.1	3.7	14.4	29.5	1.3	1.6048	0.374	4.5764	6.8	0.4	3.4	259	14	76	16	3.7	0.3	28.6	33.4	85	13.8	2.95	53	0
[truncated: 372 more rows]

## Sheet: MIMIC IV
Lactate	pH	Anion Gap	Bicarbonate	Calcium	Chloride	Glucose	Phosphate	Sodium	Hematocrit	Hemoglobin	Creatinine	UreaNitogen	Magnesium	Potassium	PT	aPTT	INR	Lymphocytes	Monocytes	Neutrophils	White Blood Cells	Basophils	Eosinophils	Platelet Count	Alanine Aminotransferase (ALT)	Alkaline Phosphatase	Asparate Aminotransferase (AST)	Albumin	Bilirubin	MCH	MCHC	MCV	RDW	Red Blood Cells	dead	HAMD		patients_age
19.5	6.92	29	19	9.8	95	63	7.8	138	32.2	10.2	9.7	86	2.5	4.6	19.3	32.7	1.8	1.792	0.896	16.352	22.4	0	0	222	75	429	240	2.7	4	32.8	31.8	103	17.5	3.12	1	20003587	17656146	57
3.6	7.46	17	21	8.7	102	105	3.4	136	22.8	7.8	1.1	28	1.7	3.6	19.6	32.3	1.8	0.616	0.056	0.096	0.8	2	2	6	35	67	50	1.9	1.2	30.4	34.1	89	13.7	2.55	1	20022465	11200984	74
0.9	7.3	6	35	7.1	112	139	4.8	149	31.3	9.6	1.4	65	2.2	4.3	11.9	28	1.1	1.33	0.7	11.718	14	0.1	1.7	150	168	489	71	2	0.5	29	30.6	95	17.3	3.29	1	20025624	14405841	69
17	7.05	37	13	7.3	92	144	6.2	142	29.3	9.3	1	13	1.3	3.8	28.3	34.8	2.6	0.906	3.322	25.368	30.2	0	1	189	151	111	736	1.6	1.3	32.4	31.7	102	12.8	2.87	1	20032690	19283742	61
1.5	7.26	16	14	7.5	106	116	4.3	131	32.6	11	1.7	36	1.9	5.1	11.2	35.3	1	0.504	0.322	12.824	14	0.3	2.3	52	17	65	32	2.9	2.1	29.1	33.7	87	15.9	3.77	1	20043333	17963938	77
1	7.47	15	20	7.8	119	63	4.1	151	33.2	10.3	3.2	102	2.1	3.4	15.6	30.3	1.4	1.3195	0.2184	7.4893	9.1	0.3	0.5	117	195	315	95	2.3	0.6	28.1	31.2	90	16.3	3.68	1	20051569	11289928	79
1.3	7.35	12	18	7.3	110	111	2.1	135	31.5	9.9	0.5	14	1.9	4.6	36.3	55.8	3.5	1.9558	0.9856	12.2738	15.4	0.2	1	266	25	48	61	3.8	3.3	29.5	31.5	94	16.1	3.36	1	20055925	14272441	91
4.9	7.31	12	27	6.9	124	107	3.9	160	32.9	9.9	1.8	85	2.5	3.3	86.2	49.4	8.2	0.624	0.624	8.216	10.4	0	0	171	11	61	25	2.1	0.9	28.7	30	96	19.1	3.43	1	20065759	10790860	84
2.6	7.37	14	20	8.1	106	157	1.1	137	36.9	11.5	0.4	18	1.5	2.5	11.9	28.1	1.1	0.063	0.018	0.132	0.3	0	0	171	21	115	33	1.9	0.3	28.8	31.2	92	14.9	4	1	20065900	13870027	87
4.6	7.38	23	20	7.7	99	235	6.2	136	28.9	9.6	4.1	48	2.5	5.5	29.2	49.3	2.6	1.5257	1.0868	18.2666	20.9	0.1	0	56	101	208	363	3.6	14.7	34.6	33.3	104	18.7	2.78	1	20068018	16418013	66
8.2	7.29	19	12	7.2	104	180	4.2	131	21.5	7.2	2.2	27	2.2	4.2	13	26.6	1.1	0.6601	0.0276	1.5686	2.3	0.7	1.2	58	71	35	99	1.5	1.1	33.1	33.4	99	13.9	2.17	1	20070255	13679226	68
1.3	7.29	10	27	7.5	102	85	2	135	33.4	11.5	0.5	14	1.8	3.9	13.9	49.3	1.3	0.5934	0.2346	12.9444	13.8	0.1	0.1	165	25	29	39	2.6	0.3	32.9	34.2	96	12.4	3.48	1	20078527	11700565	75
3	7.44	20	26	8.7	93	174	1.6	135	21.9	7.4	1.1	27	1.7	3.7	13.1	21.9	1.2	0.9202	0.3612	2.9799	4.3	0.2	0.6	45	24	153	30	2.7	0.4	31	35.3	88	18.8	2.38	1	20115323	13251286	66
4	7.3	15	17	7.4	108	283	2.5	137	32.7	10.7	2	29	2.3	3.3	18.2	39.5	1.6	0.754	0.754	33.176	37.7	0	0	134	91	63	132	2.3	0.9	30.6	32.7	94	15.4	3.5	1	20118208	12100624	87
4	7.41	8	31	8	105	176	3	140	21.1	9.3	0.7	37	2.1	3.8	11.4	27.8	0.9	0.763	0	10.137	10.9	0	0	120	85	60	42	2.7	0.7	31.1	35.1	88	13.8	3	1	20127650	11197129	62
5.5	7.35	11	20	7.2	124	94	1.7	155	24.8	8.1	1.1	27	2.1	2.8	14.5	28.2	1.3	0.585	1.56	16.77	19.5	0	0	71	53	97	54	3.1	0.5	28.7	32.7	88	16	2.82	1	20146263	14446260	30
3.5	7.42	18	17	8.3	105	187	3.5	136	50.5	16.3	0.5	9	1.3	3.5	13.3	32	1.2	0.5676	0.7396	15.7724	17.2	0.1	0.6	305	29	104	45	2.4	0.7	35.8	32.3	111	13.8	4.56	1	20148076	15503721	82
2.9	7.38	18	20	8.1	97	204	4.5	130	33	11	2.1	116	2.4	5.2	22.7	43	2.1	0	0.372	17.298	18.6	0	1	114	20	118	46	3.5	9	31.7	33.3	95	16.5	3.47	1	20155153	13327775	68
2.5	7.33	13	34	10.8	104	293	2.6	151	34	9.8	0.8	23	1.1	2.9	15.1	35.8	1.4	2.2152	1.1544	11.7468	15.6	0.3	2.2	357	18	79	107	2.7	0.3	24.3	28.8	84	18.6	4.03	1	20157596	11744921	64
0.8	7.39	18	19	7.8	103	84	4.6	140	24.1	7.3	1.6	26	1.8	3.4	17.7	40.6	1.6	0.562	0.9554	25.7396	28.1	0.1	0.5	597	25	204	37	1.9	0.3	29.7	30.3	98	20.2	2.46	1	20159294	13886051	66
3.7	7.35	12	20	8.4	108	107	2.7	140	35.8	11	1	28	1.6	4.7	14.6	30.5	1.3	1.581	1.105	13.804	17	0.6	0.2	217	9	145	15	2.5	1.6	26.4	30.7	86	15.4	4.17	1	20165317	18560132	77
3.3	7.18	18	23	9	93	69	5.3	129	28.5	8.5	1.5	30	2.5	5.3	21.7	35.5	2	2.534	1.267	13.213	18.1	0	0	404	86	953	243	3	8.6	28.5	29.8	96	18.2	2.98	1	20189200	11452473	61
1.2	7.46	13	21	7.5	106	143	3.8	140	24.3	8	0.4	21	1.9	3.3	12.5	28	1.2	1.1562	0.2952	2.6281	4.1	0	0	89	14	214	34	2.2	0.2	29.5	32.9	90	17	2.71	1	20192054	18172199	54
3.9	7.4	20	23	7	105	239	2.7	145	22.8	7.2	0.7	8	1.8	2.6	18	37.3	1.6	0.021	0.042	1.806	2.1	0	4	15	14	149	41	2.8	1	28.1	31.6	89	19.9	2.56	1	20197360	18568908	49
1.1	7.44	17	18	8	115	231	2.9	145	35.3	11.8	2.5	102	2.3	4.5	19.8	51.1	1.8	0.3266	0.2556	13.6036	14.2	0.1	0	137	26	726	82	2.8	4.5	30.3	33.5	91	17.3	3.89	1	20197905	16359591	89
5.3	7.15	23	7	7.5	97	73	5.4	127	33.1	11.3	2.7	45	1.9	3.1	49.8	91.2	4.6	0.294	0.189	9.828	10.5	0.1	0	42	120	272	247	2.3	34.1	33.3	34.1	98	14.3	3.39	1	20215576	17882080	50
6.3	7.17	20	15	8	103	92	6.6	138	56.5	17.3	5.4	85	2.8	6.9	25.7	63.1	2.4	0.872	2.18	40.112	43.6	0	0	61	112	598	160	2.3	10.1	27.9	30.6	91	27	6.21	1	20219908	19595558	87
0.8	7.42	12	25	8.8	110	122	3	143	30.3	10	1	15	2.2	3.7	12.6	30.3	1.1	0.966	0.966	13.846	16.1	0	0	610	21	65	29	2.9	0.5	30.2	33.2	91	16.3	3.33	1	20220052	18512221	61
5	7.32	20	17	7.4	109	301	3.7	142	32.6	11	1.4	45	1.8	4.3	14.8	36.8	1.3	0.462	0.044	0.242	1.1	0	0	41	39	64	39	2.1	0.4	30.8	33.9	91	16.3	3.59	1	20221800	10812451	75
2.1	7.41	15	32	8.1	90	144	3	133	30.5	9.9	0.8	16	2.5	3.9	16.1	30.4	1.5	2.244	0.8364	16.9524	20.4	0.1	0.4	275	17	270	28	2.7	0.7	29	32.5	89	15.4	3.41	1	20233418	12465063	60
2.1	7.39	15	25	9	104	88	2.9	139	35.5	11	1.7	39	2.3	5.4	13	71.9	1.2	0.3	0.42	5.22	6	0	1	110	83	98	272	3.5	1.2	31.1	30.9	101	18.3	3.52	1	20233478	19328005	88
2.8	7.43	14	21	8.9	107	123	2.3	138	43.9	14	1.7	31	2	4.2	16.3	34.6	1.4	1.5549	1.0512	19.0092	21.9	0.3	0.9	314	20	124	28	3.2	2.2	24.7	32	77	18.6	5.69	1	20234395	18804459	81
1.4	7.35	27	17	7.9	102	142	6.1	142	26	8.3	7.2	155	2.8	4.4	13.4	37.4	1.2	0.2912	0.2808	4.5916	5.2	0.4	0.2	44	291	61	143	2.7	1	30.5	32	95	15.8	2.73	1	20247409	16643806	70
1	7.44	10	27	7.2	111	206	1.9	144	39.8	13	0.8	47	2.2	4.1	23	39.8	2.2	0.6	0	14.25	15	0	0	79	156	66	130	2.1	4.3	30.7	32.7	94	15.8	4.25	1	20274958	16935205	67
1.6	7.4	17	21	9.9	114	137	2.8	148	25	7.7	1.7	27	2.1	4.2	37.9	88.1	3.6	1.4152	1.1834	9.5038	12.2	0.2	0.5	90	6	34	21	3.7	2.9	33.2	30.8	108	15.5	2.32	1	20288632	19640525	46
0.8	7.37	12	24	7.6	99	106	3.2	131	33.9	12	0.8	19	1.8	4.2	16.4	27.4	1.4	0.5236	0.5082	14.1372	15.4	0.4	1.1	474	30	85	46	2.4	1.3	32.6	35.3	92	13.1	3.68	1	20293184	12281187	73
3.8	7.26	19	17	7.6	122	216	5.4	158	38	11.4	3.5	72	2.3	4.4	15.7	27.8	1.5	1.5066	1.458	21.1167	24.3	0.1	0	105	8	64	20	2.4	0.6	26.8	30	89	16.3	4.25	1	20316555	15806706	79
1.4	7.3	12	21	7.1	109	140	2.1	138	26.4	8.4	1.9	30	2.3	3.6	14.9	29.5	1.3	1.089	0.2376	8.4447	9.9	0.3	1	225	57	360	52	3.2	0.4	28.9	31.9	91	16	2.91	1	20317279	13499005	83
2.4	7.39	26	23	7.4	95	19	4.3	138	39	11.8	6.7	34	2.5	5.8	19.7	150	1.9	0.2	0.04	0.224	0.8	0	0	54	25	255	55	2.5	0.8	30.8	30.4	101	16.9	3.84	1	20329236	16509046	56
4	7.38	18	23	8.6	101	131	4.3	139	26	8.6	1.8	62	1.7	3.4	16.9	30.6	1.5	0.882	0.294	25.284	29.4	0	0	381	13	106	25	2.3	0.6	28.5	33.3	86	16.3	3.04	1	20337540	15761754	75
1.7	7.44	16	20	7.3	104	94	4.3	136	34.2	11.5	2.4	89	1.9	3.9	15.6	35.3	1.4	0.5929	0.2904	11.1562	12.1	0.3	0.2	51	136	141	204	2	1.5	31.7	33.6	94	16.6	3.63	1	20360408	13785095	67
6.4	7.26	21	15	7.6	109	201	5.5	140	28.6	9.3	1.8	25	2	5.2	19.6	30.1	1.8	0.5828	0.5828	8.2062	9.4	0.2	0.1	134	523	60	705	2.9	1	30.8	32.4	95	16	3.02	1	20373636	11681010	83
2	7.22	12	26	8.7	106	120	3.6	140	27	8.5	0.7	17	2	4.2	13.5	28.1	1.2	0.752	0.752	4.23	9.4	1	1	439	78	64	111	2.7	0.7	26.4	31.6	84	18.4	3.23	1	20374655	11337495	84
1.6	7.46	15	21	8.1	124	193	4.2	160	31.5	9.7	1.1	75	2.4	4.2	15.3	27.6	1.4	0.6594	0.5495	13.816	15.7	0.4	2.8	331	17	134	26	2.6	0.3	30.3	30.8	98	15.7	3.2	1	20376084	12173850	64
8.3	7.32	29	16	8.1	94	204	2.5	139	20.6	7.1	1.3	31	1.6	4.1	13	39.9	1.2	0.105	0	3.255	3.5	0	0	17	8	317	191	1.9	5.4	30.1	34.5	87	18.7	2.36	1	20392650	17051865	72
0.9	7.33	17	17	7.7	104	119	3.5	134	26.4	8.7	1.3	34	1.8	4.1	11.6	34.7	1	0.49	0.42	33.95	35	0.3	0	324	4	345	22	2.4	0.2	30.1	33	91	16.5	2.89	1	20396115	10923536	58
1.9	7.4	13	18	8.2	113	94	2.1	140	23.4	7.6	1.1	21	2.1	3.6	20.4	62.1	1.9	2.61	0.87	11.484	17.4	0	10	244	13	498	18	2.3	0.9	28.7	32.5	88	19.2	2.65	1	20405690	14954046	43
2.4	7.32	13	23	8.1	103	99	2.7	139	23.6	8.4	0.6	4	1.9	4.9	21.1	36.1	2	0.109	0.654	10.028	10.9	0	0	80	18	188	102	3.6	24.3	39.4	35.6	111	22	2.13	1	20409877	12460706	56
0.9	7.3	12	17	7.8	111	102	2	136	23.4	7.8	1.8	24	2.2	4.2	19.1	42.8	1.8	2.255	0.22	1.43	5.5	0	1	18	8	106	10	3.5	0.7	26.7	33.4	80	21.8	2.92	1	20413589	10796375	55
3.3	7.22	23	18	6.6	82	118	2.6	119	30.9	10	3.9	48	2.2	3.7	21.9	45.1	2	0.123	0.861	9.963	12.3	0	0	50	120	92	245	4.1	23.2	37.2	32.3	115	22.2	2.68	1	20421400	14789110	67
2.9	7.36	17	26	8.5	110	149	4.8	149	25	8	1.2	27	2.4	3.5	23.8	42.9	2.2	0.8645	0.624	4.9595	6.5	0.1	0	67	21	75	33	2.9	2.2	30.4	32	95	22.5	2.63	1	20423027	13946340	47
11.9	7.06	35	8	8.2	97	109	9.4	132	33.3	9.7	1.8	53	3.2	7.5	27.9	126.7	2.7	2.893	2.104	4.471	26.3	0	1	405	35	81	70	1.4	0.4	30.8	29	106	16.4	3.14	1	20423951	10196073	88
2.2	7.39	12	27	9.2	102	147	2.8	141	40.8	13.6	0.9	9	1.9	4.3	13.6	31	1.3	0.6319	0.4717	7.5472	8.9	0.2	0.5	213	21	101	20	4.2	0.8	32.2	33.3	97	12.9	4.23	1	20428190	14418220	67
5.4	7.31	18	25	7.5	94	86	4.7	132	27	8	5	48	2.2	5.3	24.3	50.5	2.2	0.89	1.157	4.717	8.9	0	0	210	6	78	22	1.7	1	37	29.6	125	17	2.16	1	20433528	18622600	56
4.7	7.2	24	13	8.7	99	205	6	130	25.9	8.8	1.2	29	2.2	5.4	28.9	55.9	2.8	3.7074	1.1857	11.6065	16.7	0.8	0.4	70	197	94	644	3.2	21.9	33.7	33.8	100	23.9	2.6	1	20440298	13411545	60
4.7	7.3	22	16	7.9	97	96	4.4	130	37.7	12.3	1.2	59	2.1	4.7	16.8	28.8	1.5	0.267	0.356	8.01	8.9	0	0	147	15	112	24	2.2	0.5	31.1	32.6	95	15.6	3.96	1	20441454	11466749	76
1	7.4	12	21	7.5	112	114	3.9	141	22.7	7.8	1.3	21	2	4.3	14.4	34	1.3	0.16	0.64	7.2	8	0	0	71	34	65	113	2.3	7.4	30	34.4	87	17	2.6	1	20461991	16097925	33
2.2	7.44	23	30	9.2	87	188	4.2	135	29.9	9	2.3	156	2.6	4.5	11.9	38	1.1	3.732	2.799	23.947	31.1	0	2	189	52	393	87	2.7	0.4	26.5	30	88	16.2	3.39	1	20465429	12952223	86
4.6	7.32	19	20	8.2	105	348	2.6	141	32.8	10.5	1.2	34	1.8	3.1	12.3	29.5	1.1	0.6104	0.4905	9.7228	10.9	0.2	0.4	262	193	223	236	2.5	0.2	32.7	32	102	13.7	3.22	1	20476137	19288911	91
2.9	7.31	29	10	6.6	107	87	4.6	139	31.3	10.3	6.6	82	1	7	12.6	30	1.2	2.296	0.574	25.543	28.7	0	1	294	9	160	11	2.8	0.4	29.1	32.9	88	16.6	3.54	1	20476893	15134888	73
2.7	7.48	16	21	8	98	174	3.4	130	36.1	11.6	0.8	19	1.8	5.4	28.2	34.7	2.5	0.8374	0.6952	14.0778	15.8	0.2	0.2	381	12	141	23	1.9	0.5	28.6	32.1	89	17	4.05	1	20483705	15792990	91
6.1	7.45	18	25	6.7	98	92	2.9	138	35.4	11.5	0.6	19	1.9	2.9	23.4	66.1	2.2	0.288	0.216	6.408	7.2	0	0	110	103	151	45	1.4	3.9	31.8	32.6	98	20.3	3.63	1	20496202	10464570	35
3.6	7.5	17	22	7.4	98	64	1.6	133	36.5	12.6	0.7	16	2.2	4.3	21.9	39.6	2	1.188	0.7326	17.7804	19.8	0.3	0.3	396	97	245	256	2.9	8.4	28.8	34.7	83	14.6	4.4	1	20497650	13171949	53
1.6	7.41	15	17	8.2	108	70	4.2	136	32.5	10.7	1.9	31	2.3	3.9	13.6	37.9	1.2	1.2382	0.2501	2.4928	4.1	0.7	2.2	79	99	181	147	2.8	2.2	30	33.1	91	15.9	3.58	1	20500273	14114086	71
3.7	7.36	13	21	7.3	115	185	2.3	149	24.3	7.8	1.4	95	2.7	4.1	26.6	51.6	2.4	0.684	1.197	14.535	17.1	0	1	91	141	127	225	2.2	20.3	32	32.1	100	21.6	2.44	1	20502339	17962978	48
0.7	7.42	14	24	8.4	113	84	4.2	147	27.6	9.6	1.7	42	2.7	3.6	17	33.6	1.5	1.296	0.648	19.008	21.6	0	1	183	13	107	13	1.8	0.8	30.8	34.8	89	15.8	3.11	1	20509990	13017386	75
4.4	7.35	17	16	6.3	105	130	4	134	31.5	10.5	1.1	17	2.9	4.2	19.4	42.5	1.8	3.066	0.876	14.892	43.8	0	3	138	13	91	37	2.5	0.5	30.7	33.4	92	16.3	3.43	1	20515061	14478454	60
0.8	7.36	10	24	8.3	114	115	2.4	144	28.3	9.6	0.7	36	2.1	3.6	16.1	35.3	1.4	0.7888	1.4416	11.2744	13.6	0.1	0.7	188	17	58	17	2.7	1.5	30.3	33.9	89	14.5	3.16	1	20516028	11481806	85
4.1	7.3	22	16	8.4	96	48	7	129	20.5	7	5.6	79	2.7	5	33	72.1	3	0.402	0.134	12.328	13.4	0	1	54	72	111	201	2.6	13.3	35.7	34.1	105	17.8	1.96	1	20518579	19275775	67
1	7.43	13	29	7	101	133	1	139	32.6	10.6	5.4	29	1.6	3.9	40.3	38.9	4	1.1484	0.4224	11.5104	13.2	0.2	0.7	190	12	107	22	2.8	0.3	30.9	32.5	95	14.9	3.43	1	20537951	13258755	80
2.6	7.4	17	22	8.6	107	116	5.5	141	42.6	14.4	4.5	113	2.8	4.8	29.1	53.1	2.9	0.223	1.115	20.293	22.3	0	1	91	57	117	115	2.4	24.9	34.5	33.8	102	16.1	4.17	1	20542778	12462414	71
1.1	7.44	7	28	7.9	104	129	3.1	135	26.7	8.5	0.3	18	1.8	4.2	14.8	38.9	1.4	0.588	1.3524	7.6636	9.8	0.2	1.1	345	8	77	18	1.9	0.2	23.9	31.8	75	22.7	3.55	1	20544273	13080456	66
1.7	7.32	19	13	8.5	108	86	2.4	140	23.7	7.5	0.9	13	1.3	3.2	13.8	26.2	1.3	0.968	0.528	7.128	8.8	0	0	198	23	479	337	2.1	0.3	30.7	31.6	97	20.7	2.44	1	20544792	13099797	46
5.7	7.55	16	25	8.5	100	158	2.6	137	34	11.2	0.9	23	2.3	3.7	12.1	22.3	1.1	1.74	1.131	14.1462	17.4	0.3	0.4	122	17	72	16	3.2	0.8	30.3	32.9	92	17.5	3.7	1	20552786	16040728	81
8.4	7.44	16	21	7.2	105	181	5.8	142	28.8	9.4	2	42	2.5	4.2	15.4	31.1	1.4	0.8086	2.3014	27.5857	31.1	0.1	0	305	10	68	26	1.7	0.4	27.6	32.6	85	16	3.4	1	20554695	12886804	57
1.8	7.42	13	23	7.4	122	90	2.2	154	26.7	8.7	0.9	19	1.8	3.5	21.7	150	2	0.2737	0.0799	1.326	1.7	0.4	0.7	37	14	253	31	2.2	1.3	34.5	32.4	107	19.6	2.51	1	20557962	11179809	75
0.9	7.36	8	30	8.8	106	89	3	140	30.6	10.3	0.3	20	1.9	4.3	13.9	27.5	1.2	0	0	1.602	8.9	0	0	216	101	261	73	2.6	1.2	33.4	33.7	99	15.3	3.09	1	20564919	18894258	56
1.1	7.31	12	22	7.9	105	176	2.9	139	27.1	8.4	0.6	16	1.9	3.7	15.9	26	1.5	0.2295	0.2499	4.488	5.1	0.3	1.6	112	12	83	19	2.4	0.3	28.8	31	93	15.4	2.92	1	20567236	11166614	91
2.2	7.52	13	29	7	93	98	2.8	131	33.9	11.2	0.8	21	1.8	3.5	15.6	28.1	1.5	0.512	0.448	5.312	6.4	1	1	130	27	171	75	2.9	0.5	31	33	94	14.3	3.6	1	20592394	13722065	77
2.2	7.29	19	22	7	103	104	4.8	139	28.6	9.4	5.2	37	1.9	4.5	18.2	32.8	1.7	0.215	0.015	0.24	0.5	6	0	136	23	71	36	2	0.5	28.1	33	85	16.6	3.37	1	20602578	18299037	61
1	7.33	13	20	8.3	107	115	4.5	140	27	8.4	1.4	45	3.6	4.1	12.8	41.6	1.2	0.6363	0.1212	9.2112	10.1	0.1	0.3	207	48	104	135	2.4	0.4	28.3	31.1	91	17.4	2.97	1	20606203	12602264	78
21	6.93	47	5	6.4	77	138	7.3	129	23.3	7	1.5	30	1.2	3.3	37.1	46.6	3.4	2.32	0.696	18.328	23.2	0	0	221	15	126	130	2.7	7.5	31.4	30	105	15.3	2.23	1	20611972	11409471	57
1.1	7.38	15	27	8.4	97	233	4.9	139	24.4	8.1	1.5	89	1.9	3.8	20.9	32.8	1.9	0.143	0.4862	13.5278	14.3	0.1	0.1	158	20	78	23	2.7	0.6	31.2	33.2	94	16	2.6	1	20624617	11725800	62
2.2	7.28	15	20	8.8	95	100	4.1	126	31.6	10	0.6	8	1.7	4.3	14.5	42.2	1.3	0.42	0.21	5.88	7	0	0	510	26	482	47	1.9	17.9	28.6	31.6	90	17.5	3.5	1	20632457	17514371	74
1.2	7.47	13	22	8.1	101	77	3.1	132	22.8	7.6	1.8	23	2.3	4	21.4	48.7	2	1.386	2.541	17.094	23.1	0	3	185	13	318	52	1.8	7.7	30.6	33.3	92	21.9	2.48	1	20657344	16397367	77
2.4	7.45	23	25	10.4	97	273	3.6	139	21.9	7.1	2.6	181	4.4	5.7	25.6	50	2.5	0.172	0.344	3.483	4.3	0	1	54	51	134	80	4.6	44.8	36.3	32.3	113	21	1.95	1	20664279	15051294	69
3	7.22	17	22	9.2	95	108	3.8	130	20.5	7.1	1.3	37	2.6	3.8	28.1	74.6	2.7	0.95	0.3192	6.0952	7.6	0.3	3	55	35	93	71	4.9	34.7	32.7	32.4	102	16.4	2.2	1	20673366	12964757	53
5.8	7.3	17	17	7.7	106	84	3.4	140	31.4	10.4	1.8	32	1.3	3.6	16.7	30.9	1.5	0.133	0.57	1.102	1.9	0	0	71	136	178	159	3	6.9	35	33.1	106	16.4	2.97	1	20691706	18872394	78
3.3	7.36	17	22	6.9	105	153	5.4	140	31.9	10.9	2	17	1.6	3.8	15.9	32.8	1.5	2.322	0.129	7.998	12.9	0	0	56	476	92	960	2.7	1.6	29.8	34.4	87	14.3	3.68	1	20699286	18892323	77
4.5	7.45	18	22	9.1	102	154	6.7	138	22.6	7.7	1.9	36	2.2	3.7	18.7	34.1	1.7	0.2875	0.5375	11.525	12.5	0.5	0.4	62	17	96	21	3.7	0.8	30.8	34.1	90	15.6	2.5	1	20725896	17481338	80
5	7.37	21	21	8.1	94	149	6.1	135	29.1	9.7	1.7	47	2.7	3.7	31.1	43	3	0.9945	0.884	20.1773	22.1	0.1	0	39	636	265	649	2.5	8.7	28.2	33.3	85	16.2	3.43	1	20730863	10886362	69
4.7	7.32	10	40	8.5	96	127	5.1	142	27.2	8.6	0.9	38	2	4.3	13	22.4	1.1	1.152	0.576	3.648	9.6	0	0	194	19	41	14	3.1	0.1	28.5	31.7	90	17.5	3.03	1	20736677	19063952	68
2.1	7.41	17	27	8.5	103	388	4.1	142	42.6	13.9	1.2	44	2.2	5.3	12	31.1	1.1	0.656	0.2952	7.175	8.2	0.5	0.4	235	78	50	66	2.8	0.6	30.2	32.7	92	13.5	4.61	1	20750856	18788792	56
4.2	7.42	15	31	7.6	98	109	3	140	24.9	8.3	0.2	11	1.8	3.5	20.5	43.1	1.9	0.475	0.025	1.75	2.5	0	1	74	40	638	94	2.4	14.3	32.8	33.5	98	21.5	2.54	1	20751000	19193410	44
1.8	6.98	10	23	7.1	105	128	2.1	135	36.2	12.8	1.3	22	1.3	3.4	25.8	53.1	2.5	0.2332	0.159	10.1548	10.6	0.2	0.4	59	29	35	57	3.3	2	32	35.4	90	13.5	4	1	20756799	11235409	63
3.1	7.45	21	22	10.2	102	146	1.6	145	22.8	7.4	1.2	19	1.8	3.8	16.5	40	1.5	0.416	0.416	18.72	20.8	1	1	71	46	156	195	4.4	29	30.1	32.5	93	17.3	2.46	1	20758068	12737042	75
1.5	7.33	9	30	8	105	103	3.7	144	33.4	10.1	0.9	30	2.3	4.1	11.8	25.3	1.1	1.1024	0.689	8.6178	10.6	0.1	1.2	141	26	150	41	2.4	1.8	24.9	30.2	83	21.4	4.05	1	20766485	13788978	78
4.8	7.21	31	10	8.2	97	139	9.8	138	36.3	10.8	3.3	109	2.9	6.7	16	45.3	1.5	0.6612	0.7524	21.1128	22.8	0.2	0	546	46	120	60	2.5	0.3	25.8	29.8	87	14.6	4.18	1	20778904	15696167	81
1.3	7.53	12	23	9.2	103	130	2.5	138	30.1	10.2	0.9	31	2	3.6	15	27.4	1.4	1.519	0.4998	7.693	9.8	0	0.4	122	12	143	15	2.9	0.6	29.5	33.9	87	17.6	3.46	1	20791789	18756393	67
1.3	7.49	12	33	8.3	94	150	3.4	134	24	8.1	0.6	26	2.6	5.2	12	25.8	1	2.669	0.1615	5.2785	8.5	0.4	4.2	219	25	71	28	2.2	0.5	30.7	34	90	15.7	2.65	1	20792774	15700698	71
5	7.31	14	24	8.1	102	139	2.5	138	26.4	8.4	0.3	10	1.9	3.2	16.4	35.8	1.5	1.736	1.302	18.011	21.7	0	0	211	228	432	341	1.7	16.9	36.5	31.8	115	22.5	2.3	1	20809480	14324150	37
9.8	7.2	30	9	8.2	95	60	4.5	130	30.1	10	1.5	28	1.7	3.6	31.4	52.9	2.8	0.042	0.098	0.952	1.4	0	0	57	23	40	56	2.7	21.7	34.5	33.2	104	19.9	2.9	1	20818765	12181546	57
0.7	7.29	24	16	9.1	103	78	5.5	139	23	7.6	3.2	141	1.9	4.3	20.5	50	1.9	1.1232	0.7332	13.494	15.6	0.4	1.1	50	15	114	14	1.4	0.3	31.9	33	97	20.5	2.37	1	20821056	10613952	70
2.9	7.26	19	16	8.6	129	72	6.1	164	36.9	10.9	4.4	125	3	5.3	16.9	23.6	1.6	1.468	0.367	31.195	36.7	0	0	289	164	109	237	3.1	0.5	29.4	29.5	100	16.3	3.71	1	20838774	15016435	87
2.4	7.58	18	39	8.8	91	107	3.6	144	26.1	8.1	0.9	46	2	3.9	14.4	69	1.3	1.432	0.6265	15.4119	17.9	0.2	0.7	545	14	223	22	2.6	0.4	27.2	31	88	19.9	2.98	1	20850675	16403658	66
2.2	7.35	18	21	9	100	102	3.4	134	41.8	13.3	1.1	26	2	5	19.5	30.5	1.8	1.5288	1.0192	6.37	9.1	0.7	1	189	404	205	401	3.5	0.9	30.4	31.8	95	15.6	4.38	1	20876897	16438060	91
8	7.36	38	11	10.1	98	295	6.7	142	50.2	15.4	2.1	52	2.4	4.7	35.6	68.5	3.8	1.175	1.3395	20.915	23.5	0.1	0.2	370	258	123	386	4.1	2	29.6	30.6	97	13.7	5.2	1	20892451	18648544	84
4.7	7.42	14	25	8.7	103	185	3.2	142	36.8	11.9	0.9	10	1.7	3.7	13	27.6	1.2	1.9038	0.741	7.0566	11.4	0.9	13.4	299	20	110	17	2.6	0.5	30	32.3	93	13.5	3.97	1	20894865	12342976	50
3.2	6.98	20	14	5.9	116	67	9.1	145	40.4	13.1	1.5	41	1.9	4.7	27.2	72.1	2.7	2.079	0.504	1.953	6.3	0	1	166	45	69	52	1.9	0.4	31	32.3	96	13	4.22	1	20895093	16868333	67
2.3	7.52	15	24	8.7	110	240	1.2	145	35.6	12.3	1.3	23	2	3.7	12.6	24.4	1.2	0.5658	0.5934	5.5752	6.9	0.4	0.6	89	25	86	39	3	1	32	34.6	93	15.8	3.84	1	20902878	17011138	70
5.4	7.44	23	19	7.2	100	96	6.9	136	34.4	10.8	4.1	71	2.8	5.8	19.6	32.1	1.8	1.35	0.81	24.03	27	0	0	40	217	898	114	2.1	5.6	35	31.4	111	20.4	3.09	1	20925347	16686811	58
1.1	7.46	10	36	8.1	98	202	3.4	139	22.8	7.3	0.6	22	2.4	4.7	12.3	32.7	1.1	1.3145	2.7485	19.0961	23.9	0.2	2	274	7	87	17	2.2	0.2	28.5	32	89	15	2.56	1	20929866	13399504	68
1.3	7.46	14	25	8.3	112	117	4.2	147	27.3	9.1	3.6	143	2.1	3.8	14.7	26.2	1.3	1.47	1.47	11.025	14.7	0	0	257	193	156	59	2.5	1.2	31.2	33.2	94	15.5	2.9	1	20931771	12601474	82
1.6	7.29	18	16	8.7	107	124	4.8	138	28.4	9.7	1.3	65	2.2	3.4	31.1	50.3	2.8	3.1595	1.278	30.7785	35.5	0.2	0.2	103	18	153	61	3	3.9	31.4	34.2	92	21.4	3.09	1	20934668	13675174	56
1.9	7.32	15	26	9.4	102	93	2.7	139	24.6	8.6	1.4	18	1.8	4.2	12.3	37.2	1.1	0.54	1.08	4.77	9	0	0	22	64	54	177	2.5	0.8	30.1	35	86	15.9	2.86	1	20947071	14230741	85
1.4	7.29	11	18	7.3	112	90	4.1	137	21.7	7	2.3	50	2.2	3.6	55.7	55.3	5.3	1.056	0.672	7.776	9.6	1	0	149	17	170	63	2.3	2	31.2	32.2	97	22.9	2.24	1	20962225	16007921	57
1.1	7.48	20	25	7.4	96	81	4.2	138	26.2	7.9	5.8	27	1.4	2.7	27.7	30	2.5	0	0	6.9	6.9	0	0	147	7	79	16	3.4	0.3	30	30.2	100	20	2.63	1	20965125	19299811	77
7.5	7.11	24	26	9.6	99	103	4.4	144	26.3	8.6	4.3	17	2	4.9	11.8	31.7	1.1	3.861	1.386	4.356	9.9	0	3	276	11	92	46	2.7	0.3	29.8	32.6	91	19.1	2.88	1	20979978	14187451	53
2.6	7.37	18	14	7.1	108	55	3.6	136	31.2	10.1	1.9	40	2	3.7	13.4	30.3	1.1	0.393	1.048	11.004	13.1	0	1	152	98	794	291	1.5	5.3	27.6	32.4	85	22.9	3.66	1	20980274	16471158	75
1.8	7.36	21	18	8.1	119	180	2.2	154	32.6	10.6	4	35	2.5	3.7	28.5	56.6	2.8	1.4742	0.3276	16.3254	18.2	0.2	0.2	58	21	231	30	3.2	3.5	29.5	32.6	90	18.3	3.61	1	20980707	12386418	69
1.8	7.39	15	19	7.3	108	75	3.8	139	28.2	10.2	2.1	49	2.3	3.1	20.2	42.9	1.8	0.609	0.336	9.513	10.5	0.1	0.3	46	40	75	41	2.3	0.4	33	36.3	91	19.5	3.11	1	20982289	14444205	89
3.6	7.37	14	28	8	98	152	1.5	136	27	8.6	1.9	38	1.7	4	15.4	30.3	1.3	0.36	0.02	0.012	0.4	0	3	187	110	125	21	2.6	0.7	30.8	31.9	97	19.4	2.8	1	20986748	11847456	68
4.5	7.43	16	25	7.8	94	161	1.5	131	33	10.5	0.4	13	1.7	4	15.1	30.4	1.3	0.37	1.11	16.65	18.5	0	0	445	36	481	63	2.6	0.9	26.9	31.9	84	17.9	3.91	1	20996703	19195286	48
0.9	7.22	20	23	7.8	93	64	6.6	132	29.9	8.8	3	47	2.1	4.1	15.1	82.7	1.4	2.2446	1.0962	22.5765	26.1	0.2	0.5	350	29	691	51	2.2	0.5	26.2	29.3	89	15.8	3.34	1	20999229	13333527	73
1.4	7.42	14	28	7.7	96	216	5.7	133	45.3	14.7	2.1	50	2.5	4.5	14.6	39	1.3	0.9159	1.6188	18.2754	21.3	0.5	0.4	187	21	158	35	2.4	0.4	31.5	32.5	97	17.1	4.67	1	21001412	15511142	74
1.5	7.16	23	19	7.6	103	79	6.9	141	25.7	8.2	9.6	105	1.8	4.2	16.5	29.7	1.5	0.2021	0.2679	4.1454	4.7	0.2	0.4	129	63	81	70	3.2	0.7	28.6	31.9	90	19.5	2.87	1	21008666	19801487	68
2.1	7.21	24	23	8.8	91	156	5.8	133	31	9.5	5.5	67	2.1	4.6	22.9	39.6	2.1	3.104	0.97	14.744	19.4	0	1	304	170	227	135	2.4	0.4	30.9	30.6	101	19.6	3.07	1	21011985	18483313	63
1.8	7.22	18	18	7.6	117	101	3	150	22.8	7.7	0.8	34	1.5	3.3	17.2	36.9	1.6	1.164	0	4.268	9.7	0	0	417	13	53	18	2.2	0.9	30.2	33.7	90	14.8	2.54	1	21022921	12126708	86
1	7.27	18	21	6.9	111	198	6.9	145	33	10.6	2.3	107	2.7	5.4	11.9	31.8	1.1	0.1656	0.2967	6.4239	6.9	0.2	0	46	147	442	148	2.2	1.1	28.8	32.2	90	14.7	3.68	1	21024314	14654701	60
7.2	7.27	26	18	8.6	99	405	3.2	138	25.8	7.6	4.4	39	2.3	5	13.7	150	1.3	1.107	1.599	8.733	12.3	0	1	161	28	112	43	2.9	0.6	29.7	29.5	101	21.7	2.56	1	21030720	16783577	66
2.1	7.37	14	23	6.5	120	74	5.6	153	23.2	7.3	2.1	77	2.8	4.3	20.2	45.9	1.9	0.259	0	3.404	3.7	0	0	14	33	128	54	2.4	7	22.5	31.5	71	18	3.25	1	21040598	18307935	28
2	7.34	20	21	7.6	99	200	2	135	31	10.1	1	45	2.2	4.5	15.7	53.3	1.4	6.2068	1.8147	17.8577	26.3	0.3	0	248	56	45	76	3.7	0.5	31.3	32.6	96	12.8	3.23	1	21042908	18211334	76
8.3	6.93	17	20	8	111	113	4.4	145	42.1	12.8	3.3	30	1.9	3	18.4	60.3	1.7	0.582	0.006	0.006	0.6	0	0	47	10	5	59	1.7	0.5	29	30.4	95	14	4.42	1	21044939	11511428	41
1.9	7.41	31	24	7.4	97	190	10.2	148	25.9	8.9	3.6	173	2.7	3.6	24.1	32.7	2.2	0.4182	0.5412	11.316	12.3	0.1	0.1	71	105	49	123	4.1	21.3	32.5	34.4	95	18.7	2.75	1	21049875	11929406	37
1.5	7.46	16	26	9.5	95	154	3.5	133	28.3	9.3	3.1	23	2.1	3.9	15.7	27	1.4	0.928	1.16	19.72	23.2	0	1	349	121	211	225	2	0.7	28.5	32.8	87	16.6	3.26	1	21051213	13526177	62
13.8	7.16	40	7	7.7	87	51	6.2	134	19.8	6.5	1.1	18	2.4	5.9	150	150	14.6	3.568	0.446	16.502	22.3	0	0	91	249	617	791	2.1	17.1	31.6	32.8	96	20.4	2.06	1	21051906	15416400	58
1.4	7.41	16	20	8.3	111	66	4.1	143	27.9	9	2.1	28	2.1	3.8	11.9	118.1	1.1	0.741	0.4617	3.5169	5.7	0.3	17.1	124	50	77	45	2.3	0.4	30.1	32.2	94	15.2	2.99	1	21063081	10413870	69
2	7.24	13	16	7.3	115	30	2.7	139	23.5	7.2	2.2	52	1	5.2	11.8	34.6	1.1	0.204	0.068	2.108	3.4	0	0	76	16	85	61	1.6	0.3	26	30.5	85	19.1	2.75	1	21063344	17030962	78
11.3	7.32	30	19	7.7	87	123	6.5	133	23.7	8.5	1.1	14	1.3	3.3	17.5	60.4	1.6	0.9875	0.3555	6.4622	7.9	0.4	0.3	172	22	150	77	2.2	10.4	38.3	35.9	107	25.3	2.22	1	21066640	13537559	52
8.8	7.56	20	28	9.3	97	166	5.2	140	31.1	9.9	8.5	34	1.6	4.7	16.2	51.6	1.4	1.2416	0.4074	17.6346	19.4	0.1	0.5	222	16	122	24	3.4	0.6	28.9	31.7	91	15.8	3.41	1	21078339	18895046	68
1.4	7.32	11	21	7.1	113	142	2	145	21.5	7	0.9	47	2.1	3.6	17.4	27.8	1.6	2.0352	0.9964	17.5536	21.2	0.7	1.5	162	15	249	49	2.2	1.2	32.3	32.6	99	17.7	2.17	1	21092365	16711586	54
4.1	7.36	16	15	9.8	111	175	4	139	25	8	2.3	74	1.9	3.1	20.7	50.4	1.9	1.5943	0.1498	8.7633	10.7	0.4	1.5	39	26	92	49	2.1	4.8	33.2	32	104	24.4	2.42	1	21103463	19081213	66
2.1	7.46	12	31	8.6	100	171	4.3	138	24.2	8.3	0.5	25	2.2	4.9	11.6	37.3	1.1	0.28	0.1568	5.096	5.6	0.2	1	151	60	89	28	2.9	0.2	32.7	34.1	96	16.4	2.53	1	21111752	10597833	68
8.5	7.26	20	18	10.7	110	128	3.2	145	33.3	10.7	1.3	29	1.3	2.9	15.1	32.3	1.4	0.408	0.102	7.65	10.2	0	0	112	364	113	340	2.3	2.8	31.8	32.1	99	13.9	3.36	1	21119952	14682472	79
1.3	7.28	19	23	9	110	171	4.6	148	27.9	8.6	1.9	90	2.3	4.4	14.3	26.2	1.3	17.458	0.602	10.234	30.1	0	0	359	23	104	28	3.4	0.3	31.1	30.9	101	16	2.78	1	21124897	19009693	79
0.9	7.48	15	26	8.7	101	114	4.9	138	26.4	9.2	1.6	52	2.1	3.6	26.6	50	2.6	1.4986	1.3924	8.8028	11.8	0.1	0.8	74	34	65	75	3.1	27.9	35.8	35	102	25.4	2.58	1	21126489	11751512	60
1.9	7.38	17	20	11.2	112	161	3.6	146	26.5	8.6	0.9	24	2	3	12.6	20	1	0.648	1.944	29.808	32.4	0	0	86	20	161	15	2.2	0.2	29.6	32.3	92	16.7	2.89	1	21129225	17759541	65
5.8	7.43	18	24	8.3	99	145	3.4	136	35.8	11.6	0.7	24	2.1	4.9	15	42.3	1.4	0.344	0.86	13.76	17.2	0	0	236	15	124	28	2.6	0.4	29	32.4	90	15	4	1	21132191	13694166	64
5.3	7.32	23	18	8.7	101	92	2.4	138	33.4	11.1	2	26	2	4.2	32.6	55.3	3.1	0.9964	0.6392	16.9576	18.8	0.3	0.8	151	18	220	72	4	10.2	31.5	33.2	95	20.3	3.52	1	21143130	12354123	81
2.4	7.38	24	19	6.5	95	129	7.8	138	23.8	7.7	5	110	2.2	4.5	12.2	109.5	1.1	1.169	0	15.364	16.7	0	0	87	88	84	67	3.3	0.6	31.6	32.4	98	19.3	2.44	1	21147449	17002564	72
1.6	7.4	10	29	7.9	100	92	3.7	135	28.6	9.4	0.8	21	1.8	3.9	12.8	28.7	1.2	0.7521	0.218	9.9081	10.9	0.1	0.2	285	8	90	9	1.5	0.9	29.8	33	90	15.4	3.16	1	21154874	19206592	82
6.2	7.19	27	12	8.6	98	154	8.6	132	30.4	10	7	56	1.6	4.5	36	88.8	3.5	2.235	1.341	11.324	14.9	0	0	100	31	73	71	3.7	9.9	33.5	32.9	102	20.1	2.99	1	21183861	12438077	65
2.6	7.25	17	15	8.1	113	86	2.8	141	30.9	10.3	1	75	2.4	3.8	22.8	56.3	2.1	0.246	0.615	11.193	12.3	0	2	45	136	127	133	4	34.4	33	33.5	99	22.6	3.14	1	21188664	14687655	64
4.4	7.37	22	17	7.6	111	114	3.7	145	17.2	5.6	1.9	71	2.1	5.2	44.6	49.8	4	0.812	0.609	13.601	20.3	0	0	161	65	206	146	2.5	12	28.4	32.6	87	29.1	1.97	1	21193689	15379667	76
4.2	7.36	18	20	8.2	113	73	3.6	147	33.4	11.2	1.3	48	2.4	3.5	21.4	40.1	2	0	0.648	13.932	16.2	0	0	121	33	112	89	1.9	2.9	31.7	33.5	94	17.6	3.54	1	21201617	13824273	61
1.8	7.45	19	22	8.3	100	181	5.8	137	30.8	10.4	2.1	84	2.1	4.1	14	26.1	1.2	1.108	1.662	24.376	27.7	0	0	304	33	116	36	2.3	3.4	28.7	33.6	85	17	3.61	1	21202588	12619244	72
3.1	7.33	13	17	8.4	110	265	3	136	31.9	11.1	3.3	70	2.5	4	18.5	61.9	1.7	1.08	0.54	14.04	18	0	3	37	252	138	145	2.3	16.7	33	34.6	95	17.9	3.35	1	21203492	15693895	65
3.4	7.36	13	19	7.3	108	144	1.6	137	33.8	11.3	0.5	19	1.1	3.2	12.9	33.1	1.2	1.743	0.9628	13.861	16.6	0.1	0.1	295	17	146	26	1.5	0.4	33.4	33.4	100	24	3.38	1	21211651	14605826	62
1.1	7.38	15	18	7.4	104	100	3.4	132	24.1	7.5	1.4	22	1.5	4.6	13.5	29.1	1.3	0.9593	0.3801	16.5615	18.1	0.2	1	399	19	108	16	2	0.2	29.6	31	96	12.8	2.52	1	21212918	13299143	73
1.8	7.26	11	19	7.8	110	47	2.1	140	28	9.1	1.2	16	1.8	4	27	46.1	2.5	1.8048	0.7392	6.4608	9.6	0.5	4.3	78	88	148	180	2.8	3.1	34.6	32.5	107	16.5	2.63	1	21215796	17555267	59
0.8	7.34	8	26	10	102	105	3.4	136	23.5	7	1	31	1.7	4.9	13.7	58	1.3	1.1703	0.9729	11.6043	14.1	0.4	0.9	625	14	145	26	2.7	0.2	25.5	29.8	86	17.7	2.75	1	21216027	17443783	63
1.4	7.28	11	26	8.9	108	73	2.7	145	28.1	8.2	0.8	11	1.6	3.7	12.6	38.4	1.2	1.254	0.171	3.819	5.7	0	0	132	11	63	16	2.7	0.2	28.4	29.2	97	18.1	2.89	1	21233946	17229504	78
1.9	7.37	10	28	7.9	103	83	3.5	136	40.9	13.2	1.7	51	2.2	5.4	25.9	32.2	2.6	0	1.392	29.928	34.8	0	0	295	36	313	61	2	1.7	35.6	32.2	111	16.2	3.7	1	21236830	14338019	83
2.8	7.31	13	32	8.5	98	94	4.6	139	28.5	9	4.7	25	2	4.4	13	26.8	1.1	0.847	0.3773	6.4372	7.7	0.2	0.3	146	10	95	16	3.4	0.3	31.7	31.4	101	16.2	2.83	1	21244912	19711171	55
1.5	7.47	16	25	7.9	99	172	1.5	136	39.2	13.8	1	12	1.3	3.7	16	31.5	1.4	0.7921	0.3471	7.6273	8.9	0.1	1.4	132	65	108	36	4.2	2.7	28.2	35.3	80	13.9	4.91	1	21251271	10352416	23
3.6	7.27	16	19	8.3	116	136	1.5	151	35.5	11.5	0.7	37	2.1	4	14.3	30.4	1.3	0.5082	1.8997	9.4138	12.1	0.5	0.1	299	41	133	55	2.9	1	30.7	32.4	95	16.2	3.75	1	21258620	18972794	91
0.8	7.42	12	21	8.3	105	116	3	134	32.9	10.5	0.8	6	1.8	4	13.9	30.5	1.2	1.674	0.5704	10.0192	12.4	0.2	0.9	394	137	682	98	2.5	5.8	30.7	31.8	97	16.4	3.41	1	21271511	11573373	35
1.9	7.03	13	24	9.1	109	86	3.7	142	28.3	8.6	1.2	25	2.2	4.3	10.5	41.3	1	0.702	0.2925	5.4925	6.5	0.1	0.2	347	4	42	13	2.8	0.1	27.1	30.3	89	12.9	3.17	1	21275116	10285188	60
6.5	7.15	21	15	8	104	126	9.2	140	36	10.8	1.5	30	2.5	6	12.5	21.4	1.2	1.565	0.939	20.345	31.3	0	0	100	777	101	469	3.6	0.6	34.1	30	114	24.8	3.17	1	21289895	17159870	70
1.5	7.4	14	25	7.8	100	103	1.9	139	37.8	12.5	0.6	8	1.8	4	11.5	26.4	1.1	1.078	0.462	5.621	7.7	1	1	80	36	78	187	2.4	0.7	32	33.1	97	13.8	3.91	1	21295410	17313793	88
2.3	7.15	12	15	6.1	120	96	2	142	36	11.5	1.2	18	2	5.1	21.5	150	2	0.183	0.183	11.895	18.3	0	0	106	37	109	109	2.1	1.7	32.4	31.9	102	14.2	3.54	1	21305436	10080516	79
4	7.23	21	13	6.9	105	87	6.6	139	34.3	11.2	3.1	45	2.9	4.2	25.4	116.7	2.4	0.45	0.18	0.87	1.5	0	0	74	292	33	268	3	0.5	31.5	32.7	96	15.5	3.56	1	21325573	13159542	79
6.1	7.52	12	24	8.2	99	87	2.9	131	33.8	11.9	1	24	1.8	4.2	13.9	31.1	1.2	0.315	0.189	5.481	6.3	0	0	132	36	82	52	3	1.8	34.6	35.2	98	14.1	3.44	1	21348090	18591358	61
8.6	7.22	23	16	10.8	119	65	4	154	28.5	8.7	2.7	45	1.9	3.7	49.3	98.9	4.9	1.417	0.5135	4.5045	6.5	0.7	0.2	32	36	74	48	3.5	5.1	27.6	30.6	90	19.2	3.15	1	21354999	15434659	58
1.8	7.28	15	25	7.9	99	215	4.7	134	44.6	14.2	0.9	41	2.4	4.7	14.9	150	1.4	1.0028	0.6322	20.0778	21.8	0.2	0.1	202	33	395	37	2.3	0.4	28.5	31.8	90	15.7	4.97	1	21371029	11465141	71
1.6	7.38	14	22	7.9	106	71	5	138	32.8	10.7	2.4	69	2.1	4.3	15.8	36.6	1.4	0.276	0.552	10.764	13.8	0	0	240	36	93	59	2.6	0.5	30.9	32.6	95	15.1	3.46	1	21371855	14262378	91
1.8	7.31	8	22	7.2	116	114	2.6	143	22	7.2	1.1	20	1.3	3.3	17.6	45.2	1.6	0.612	0.918	26.928	30.6	0	0	403	62	100	77	2.5	1.7	31.1	32.9	95	14.5	2.33	1	21384778	15138108	83
2.1	7.28	18	25	9.2	96	182	4.5	133	43.2	13.3	1.7	28	2	6.4	16.2	33.8	1.5	0.527	0.51	15.895	17	0.2	0.1	223	299	178	175	2.9	1.1	32.6	30.7	106	15	4.07	1	21396263	17598360	44
4	7.42	17	23	7.1	100	290	3.4	136	22.7	7.8	1.3	46	1.7	3.9	20.2	27.2	1.8	0.308	0.66	9.955	11	0.1	0	171	30	494	55	2.4	4.6	33.2	34.4	97	21.5	2.35	1	21396386	10047172	73
1.9	7.44	19	17	8.5	78	75	3.4	114	34.1	12.5	0.8	23	1.7	5.4	12	27.1	1.1	0.292	0.146	14.016	14.6	0	0	259	135	386	175	3	0.4	31.7	36.7	87	12.9	3.94	1	21409523	12931129	60
4	7.35	13	24	8.5	102	172	2.1	139	39.9	13	0.6	11	1.8	3.7	20.7	33.6	1.9	0.7488	1.4274	20.9898	23.4	0.2	0	201	18	70	26	2.4	0.6	31	32.6	95	14.9	4.19	1	21420576	18017773	84
1	7.01	19	19	8.1	104	115	3	142	23.7	7.9	4	47	1.9	3.5	14.2	51.1	1.3	0.147	0.441	13.818	14.7	0	0	52	28	111	65	2	0.6	31.9	33.3	96	15.6	2.48	1	21433458	19340496	59
2.4	7.33	16	16	7.5	102	269	4.1	134	32.1	11.2	8.3	37	1.7	6.2	16.6	47.7	1.5	0.7986	0.858	4.8048	6.6	0.9	0.9	122	209	680	290	2.9	15.5	30.9	34.9	89	20.8	3.62	1	21433495	14122388	56
2.6	7.32	14	27	8.4	98	91	3.1	139	40.9	12.4	0.9	17	1.6	4.3	17.6	36.9	1.6	0.73	0.8906	12.8626	14.6	0.2	0.1	260	7	77	14	2.4	0.2	28.6	30.3	94	16.9	4.34	1	21434190	17738661	64
1.4	7.51	10	39	8.6	93	87	3.9	142	24	7.5	1.1	44	2	3.6	13.3	86.1	1.2	4.876	1.564	2.116	9.2	0	0	214	62	60	70	2.5	0.5	31.1	31.3	100	17	2.41	1	21434659	14578883	68
3	7.35	17	20	8.6	100	114	2.2	133	23.3	7.9	1.1	15	2	4.4	12.5	54.2	1.2	0.663	0.663	15.028	22.1	0	0	57	292	146	164	2	12.7	30.6	33.9	90	18.2	2.58	1	21434769	14829515	61
1.3	7.44	19	18	8.4	97	144	4	130	32.5	10.6	2.8	64	3	4	35.1	39.7	3.2	0.372	0.186	8.463	9.3	0	0	56	38	59	38	3	1.3	31.6	32.6	97	14.5	3.35	1	21435488	10896351	68
3.6	7.44	17	23	8.4	112	260	3.1	147	37.5	12.1	1.6	89	2.2	5.3	20	25.7	1.8	1.2882	0.8023	9.1982	11.3	0.1	0	148	911	163	601	3.4	4.3	27.7	32.2	86	17.1	4.37	1	21436965	15753793	69
2.3	7.46	13	33	8.1	92	182	4.1	134	38.6	11.7	1.8	64	2.3	4	20.2	31.6	1.9	1.914	0.3795	14.1075	16.5	0.2	0.4	154	128	65	40	2.4	1	30.6	30.2	102	16.7	3.81	1	21441325	19413941	78
2.6	7.42	9	36	8.7	95	108	3	137	22.8	7.5	0.8	12	1.8	3.4	11.6	32.1	1.1	2.718	1.098	13.086	18	0.7	4.3	301	7	116	13	3.4	0.4	29.3	32.9	89	16.4	2.56	1	21447101	10374990	51
2.7	7.28	19	14	7	108	112	1.5	141	24.6	7.5	0.8	24	2	3	15.1	33.6	1.4	0.332	0	6.391	8.3	0	0	189	24	140	36	2.3	1.1	26.6	30.5	87	15.5	2.82	1	21452054	17574719	85
3.4	7.53	12	23	8.9	103	102	2.2	135	28.6	10.2	0.6	4	1.8	3.4	37.8	71.5	3.6	1.768	0.3536	4.4268	6.8	0.4	3.2	116	25	55	55	2.5	7.6	33.4	35.7	94	16.8	3.06	1	21457988	14050547	47
1.4	7.41	14	22	8.1	100	178	4	136	23.4	7.8	1.8	111	2.1	4.7	22.7	49.9	2.1	0.5428	1.0148	9.4872	11.8	0.4	3.8	22	26	76	19	2.4	8.8	34.4	33.3	103	23.1	2.27	1	21458341	19176597	70
1	7.35	13	21	8.2	106	119	3.8	140	36.1	11.2	1.3	30	1.9	4	91.7	49.5	8.4	0.7242	0.2982	6.0137	7.1	0.4	0.1	198	9	45	21	3.4	0.4	30.7	31	99	13.9	3.65	1	21469398	17616449	88
5.4	7.28	19	14	7.9	118	317	0.4	148	25.6	8.7	2.4	66	1.5	2.6	15.4	23	1.4	0.087	0.018	0.183	0.3	1	0	34	23	68	26	2.7	1.5	32.8	34.1	96	18.6	2.66	1	21472477	17737924	66
1.5	7.34	14	18	8.5	107	70	2	135	27.2	9.2	0.8	16	2.2	3.9	11.3	38.9	1	0.176	0.528	7.92	8.8	0	2	59	65	94	45	2.6	2.3	30.8	33.7	92	19.8	2.97	1	21479712	16736352	86
3.5	7.43	12	27	7.8	88	98	3.6	127	21.9	7.3	0.4	10	1.9	4.2	22.7	45.4	2.1	0.512	0.512	9.984	12.8	0	0	145	90	167	149	2	1.5	29.9	33.3	90	17.1	2.44	1	21487280	11993200	49
2.2	7.44	20	24	8.3	98	228	5.7	137	40.9	11.9	5.3	66	2.3	5.3	12	32.2	1.1	0.5886	0.3161	9.9517	10.9	0.2	0.3	316	0	96	22	2.5	0.3	27.4	29	95	17.5	4.33	1	21494623	12026801	68
2.9	7.36	18	34	7.7	97	105	5.3	145	40.9	12.8	3.7	30	2	3.8	16.1	29.2	1.4	0.552	2.024	15.456	18.4	0	0	205	22	176	39	2.9	0.7	27.7	31.2	89	23.7	4.61	1	21503760	14469471	77
1.4	7.46	14	23	8.6	105	124	3.2	139	40.3	13.6	1.2	12	2.4	3.4	17.2	95.5	1.6	1.2474	0.3542	13.6598	15.4	0.4	0.6	363	15	44	25	2.3	0.7	29.7	33.8	88	13.9	4.59	1	21503995	12505045	75
3.2	7.33	16	25	9.3	97	100	3.2	135	22.6	7.7	3.2	25	1.7	3	19.9	57.8	1.8	3.3066	0.8118	14.8698	19.8	0.1	2.2	86	16	127	20	3.3	1.9	31.3	34.1	92	18.6	2.46	1	21507497	12542700	58
3.1	7.47	25	21	8.5	100	81	6.9	142	24.9	8.4	8.8	67	2.2	3.9	37.8	46.8	3.6	0.957	1.131	6.525	8.7	0	0	27	316	72	566	3.3	17.9	30.7	34	90	19	2.75	1	21509458	16479004	42
2.9	7.32	9	33	7.6	99	94	3.2	137	22.5	7.4	0.5	33	2.2	4.4	13.2	32.3	1.1	6.5314	1.8758	13.1532	22.6	0.6	4	782	28	192	62	2.5	0.7	29.5	32.9	90	14.8	2.51	1	21520079	10771068	75
4.2	6.94	15	16	7.5	115	211	7.2	140	40.1	12.3	1.3	20	2.1	5.8	37.9	106.5	3.4	2.358	0.262	23.056	26.2	0	0	546	571	119	523	2.4	0.9	33.9	30.6	111	18.3	3.62	1	21532530	18307726	71
1.9	7.35	19	17	8.8	105	153	3.1	136	26.5	8.5	1.2	16	2.3	4.5	17.2	31.1	1.6	0.278	0.278	26.132	27.8	0	0	48	17	99	43	3	19.7	33.2	32.1	104	28.2	2.56	1	21538434	16195914	48
6.7	7.37	16	15	7.1	119	150	2.5	146	31.9	10.9	1.4	48	1.6	3.8	18	31.8	1.6	0.286	1.573	10.868	14.3	1	6	79	374	70	666	2.4	2.2	30.1	34.2	88	17.1	3.62	1	21550896	11999829	73
4.5	7.2	14	18	7.9	101	78	6.7	133	28.6	7.9	2.3	94	2.3	5.6	28	39.9	2.6	5.338	1.099	8.949	15.7	0	2	213	59	236	87	2.6	1	24.2	27.6	88	18.5	3.27	1	21556826	18188526	88
2	7.39	13	20	7.6	95	92	2.5	124	25.2	8.1	1.2	52	2.1	4.2	10.4	23.8	1	0.376	0.282	3.572	4.7	0	0	103	61	143	84	2.9	0.6	29.1	32.1	91	16	2.78	1	21558215	12370975	61
1.7	7.36	27	15	8.5	96	153	4.8	135	27.9	10.1	11.1	138	2	3.3	23.2	51.6	2.1	0.54	1.62	24.3	27	0	1	61	18	80	33	3.6	33.6	34.4	36.2	95	17.4	2.94	1	21560208	15186614	46
2.3	7.46	20	21	8.5	103	146	4.7	140	33.5	11.7	0.7	12	1.8	4	11.4	24.6	1.1	4.181	0.1017	6.893	11.3	0	1.1	79	28	122	157	3.6	0.3	30.2	34.9	86	14.2	3.87	1	21567235	14751263	77
2.1	7.15	9	30	4.9	120	151	4	152	38.6	12.7	1.4	26	1.3	6.7	15.3	31.1	1.4	0.965	0.193	17.756	19.3	0	0	278	17	60	21	2.2	0.7	29.8	32.9	91	14.7	4.26	1	21570549	13066975	46
0.8	7.4	19	23	7.9	107	132	6.1	144	13.3	6.1	2.5	83	2.5	4.5	36.2	42.2	3.8	0.24	0.18	5.58	6	0	0	122	8	67	15	2.9	1	29.3	34	86	18.4	2.06	1	21588174	19983257	64
2.8	7.44	19	25	9.8	93	118	6.1	137	24.7	7.9	6.2	71	2	4.1	31.8	35.3	3	1.0478	1.7238	12.844	16.9	0.5	3.4	305	15	142	28	2.7	0.4	32.9	32	103	18.4	2.4	1	21599620	13919890	74
2.5	7.44	13	31	7.9	98	161	5	142	23.7	8	0.8	33	2.1	4.8	11.7	26.2	1.1	0.4	0	0	0.4	0	0	96	188	269	160	2.4	1.3	22.9	33.8	68	21	3.5	1	21611859	14305936	40
0.7	7.4	16	22	9.4	109	125	3.2	143	30.9	9.9	1.6	36	1.6	4.4	12.1	28.5	1.1	2.6553	0.8268	12.0363	15.9	0.3	2	193	21	118	17	2.8	0.3	29.7	32.2	93	16.9	3.34	1	21613221	12232105	85
1	7.45	11	26	7.9	114	80	1.7	147	28.8	9.9	0.4	12	1.7	3.9	19.7	35.4	1.9	0.176	0.024	0.024	0.4	0	0	35	26	127	24	2.5	0.4	29.4	34.2	86	15.5	3.36	1	21619235	17846379	64
3.8	7.43	16	19	7.9	99	773	4	130	19.3	6.5	2.9	90	2.2	4.1	18.1	29	1.6	0	0.124	5.89	6.2	0	0	75	56	51	110	2.3	1	31.3	33.8	93	15.6	2.08	1	21626527	14936002	71
7.6	7.51	17	18	9.5	106	135	2	136	47.5	14.9	0.9	37	1.9	5.3	37.5	29.4	3.7	0.7695	0.456	8.2175	9.5	0.1	0.4	217	34	91	66	2.9	2.6	32.3	31.4	103	14.2	4.61	1	21629446	19522925	84
3.9	7.36	14	22	7.7	110	320	2.1	142	41.7	13.3	1.5	78	2.2	4.4	16.3	34.4	1.5	0.32	0.384	3.712	6.4	0	0	93	24	76	31	2.2	1.2	32.8	32	103	14.6	4.07	1	21633271	19374979	71
5.3	7.33	11	29	11.1	103	84	2.8	138	32.1	10.2	0.6	11	2.2	4.9	12.2	41.6	1.1	1.782	0.198	6.534	9.9	0	0	498	45	832	108	3	9.8	29.4	31.6	93	15.9	3.46	1	21634807	18254873	61
2.5	7.43	17	21	11.8	107	122	5.5	140	23	7.4	2.7	110	2.4	5.1	21.6	32.2	2.1	0.152	0.266	3.23	3.8	1	0	47	32	88	104	3.2	4.8	22	32	69	21.5	3.36	1	21644247	12350194	53
1.2	7.42	19	22	6.9	113	81	4.5	150	23	8	2.6	82	2.3	3.5	78.6	50.1	7.1	0.368	0.552	17.296	18.4	0	0	127	20	70	28	1.7	0.3	32.9	34.8	95	14.3	2.43	1	21648462	18931949	77
9.1	7.11	28	15	7.3	107	137	8.6	145	28.7	9.6	4.5	70	2.6	5.1	15	31.1	1.3	0.68	2.21	9.69	17	0	0	83	143	348	298	2	4.4	31	33.5	93	15.5	3.09	1	21648590	10280129	62
2.1	7.4	12	21	7.3	108	95	3.7	137	39.4	12.6	2.2	67	2	3.7	11.8	71.7	1.1	0.5418	0.3654	11.6802	12.6	0.1	0.1	170	49	76	52	1.5	0.6	29.2	31.9	92	14.2	4.3	1	21649104	13142166	86
12.4	7.41	7	19	7.5	106	64	2.4	132	34	11.7	0.7	13	2.1	3.3	34.8	45.5	3.2	1.5251	1.3534	6.7468	10.1	0.7	2.4	156	392	110	696	1.7	14.9	33.6	34.4	98	18	3.48	1	21658149	15947094	67
3.1	7.34	24	12	8.2	99	79	5.1	131	34	10.4	3	48	1.6	4.3	17.3	40.1	1.6	1.477	0.211	16.247	21.1	0	0	368	17	199	49	1.9	5.1	26	30.6	85	30.8	4	1	21676141	11972269	55
2.9	7.21	19	17	8.4	101	151	5.3	137	24.3	7.7	3.9	76	2.2	4	24.8	39.9	2.3	0.204	0.51	8.772	10.2	0	1	18	27	45	60	3.9	9	32.5	31.7	103	23.9	2.37	1	21687690	11794396	71
1.8	7.51	16	22	8.7	99	169	3.4	133	36.8	12.2	0.7	16	2	3.8	12.8	107.1	1.2	0.258	0.24	5.472	6	0.1	0.4	164	303	762	335	3.2	7	31.9	33	96	17.7	3.82	1	21712062	10309494	82
1.4	7.16	9	20	7.3	108	149	2.2	132	23.7	7.6	1.7	18	1.5	4.5	18.4	31	1.7	1.0098	0.3024	3.8772	5.4	1	2.4	251	9	257	14	1.3	0.2	28.4	32.1	88	15.8	2.68	1	21712098	13935134	84
2	7.43	11	24	7.8	109	151	2.3	140	26.7	9.1	0.5	9	1.8	3.6	19	39.1	1.7	1.9311	1.3899	8.7945	12.3	0.6	0.8	142	21	147	84	2.9	4.7	32.6	34.1	96	16.4	2.79	1	21725387	19509116	55
1	7.27	19	20	8.8	107	102	3.6	141	26.6	8.6	1.7	18	2.1	5.2	12	59.6	1.1	1.0287	0.8382	10.795	12.7	0.1	0.2	49	58	137	59	2.9	1.2	31.6	32.3	98	17.3	2.72	1	21728887	15380359	86
2.5	7.36	11	27	7.6	100	110	3.5	134	25	8.1	3.6	37	1.8	4	21.2	79.6	1.9	1.729	0.9828	6.1061	9.1	0.3	1.7	129	43	406	132	1.8	1.3	34.6	32.4	107	19.9	2.34	1	21733626	18476881	65
1.3	7.37	17	15	7.7	112	155	4	140	28.8	9.7	2.8	88	2.4	3.9	15.1	25.6	1.3	0.8374	1.0428	13.904	15.8	0.1	0.1	217	51	755	279	2.2	2.8	27.9	33.8	83	16.7	3.49	1	21735394	16920763	80
1.3	7.43	17	27	9.1	97	123	2.9	137	30.5	10.2	3.4	19	1.7	3.6	14.1	32.6	1.2	0.8208	0.1748	6.3916	7.6	0.4	2.4	50	47	128	77	2.4	0.5	32.6	33.2	98	21.9	3.11	1	21750307	10288279	74
4.3	7.47	20	17	9.6	97	183	4.7	134	24.6	8.6	3.3	47	2	4	33.2	56.4	3.1	1.386	0.231	20.79	23.1	0	0	104	31	115	66	3.2	29.4	32	35	91	22.1	2.69	1	21757730	14199592	50
2	7.37	15	25	9	98	166	2.9	134	23.8	7.6	2	38	2.5	4	12.9	34.5	1.1	0.9	0.7425	20.79	22.5	0.2	0.1	265	14	74	20	2.6	0.2	34.1	32	106	16.4	2.24	1	21758244	14464933	71
1	7.46	9	23	6.7	108	110	1.5	137	29	9.6	0.4	7	1.6	3.1	12.5	32	1.2	1.3395	0.2508	3.8931	5.7	0.4	3.5	84	85	90	58	2.1	1.9	34	33	103	15.2	2.82	1	21767380	11695792	53
1.4	7.48	13	24	7.7	107	108	2.8	140	25.1	8.2	0.6	21	2	3.6	13.4	35.3	1.2	0.6072	1.0164	10.9296	13.2	0.2	4	326	158	75	216	1.8	0.1	30.3	32.7	93	16.2	2.71	1	21770316	14185804	82
14.7	6.92	26	9	7.7	109	34	6.7	144	21	6.2	1.7	15	1.6	4.4	135.4	150	12.4	0.594	0.396	2.772	9.9	0	0	36	32	38	187	0.8	2.7	32.8	29.5	111	17.9	1.89	1	21770430	19757064	38
2.4	7.47	18	17	11.2	113	150	2.4	144	43.9	13	1.1	29	1.9	4.4	14.6	33.1	1.4	0.528	0.312	5.1	6	0.5	0.4	257	27	64	52	3.4	0.9	29.8	29.6	101	16.7	4.37	1	21771492	18708817	77
1.4	7.39	20	18	7.9	105	160	7.1	139	26.3	8.8	3.9	102	2.4	3.8	14.4	60.9	1.3	1.674	1.674	15.066	18.6	0	1	124	180	93	776	2.2	5.8	32.2	33.5	96	16.9	2.73	1	21772160	15650232	61
7.3	7.08	27	13	7.1	106	458	6.9	142	28.2	8.8	1.8	27	1.6	3.9	30	41.2	2.7	0.239	0.717	20.793	23.9	0	0	121	405	104	994	2.3	0.3	30	31.2	96	13.9	2.93	1	21776214	14212075	67
5.5	7.22	25	10	8.3	112	50	4.1	143	30.8	9.8	1.9	22	2.2	3.8	28	86.5	2.7	0.731	0.017	0.306	1.7	0	6	143	23	33	59	3.8	6.1	32.1	32	100	15.2	3.07	1	21788397	18120946	58
0.9	7.51	13	36	8.9	103	221	3.3	148	34.6	11	1.4	43	2.4	3.5	12.1	33.4	1	0.26	0.15	9.57	10	0	0.1	127	35	77	28	2.6	1.1	28.5	31.8	90	15.1	3.86	1	21788727	12107907	67
1.8	7.3	15	21	8.3	97	98	3.9	129	40.3	14.3	0.7	11	1.5	4.1	12.8	35.4	1.2	0.5358	0.1311	4.9875	5.7	0.2	0.6	252	17	98	18	3.4	1.1	30.6	35.4	86	13.4	4.67	1	21798849	13012861	52
1.8	7.42	18	22	8.6	105	129	2	142	41.1	13.6	0.7	14	1.9	3.4	10.8	31.8	1	2.8875	1.15	8.1625	12.5	0.5	1.7	157	27	62	34	3.4	0.6	27.9	33.1	84	13.2	4.87	1	21806634	14718594	77
2	7.06	14	29	8.9	110	224	4.1	149	26.4	8.5	0.7	25	1.8	3.5	10.3	38.7	0.9	1.1004	0.3486	2.5662	4.2	0.3	4.1	137	13	130	41	2.7	0.2	33.9	32.1	106	19.3	2.5	1	21813052	11911069	72
3.2	7.27	12	28	8.9	106	100	4.1	142	34.7	11.4	1.1	18	2.4	4.4	12.8	36.9	1.2	0.9312	0.5184	7.968	9.6	0.7	1.1	195	20	141	28	2.5	0.6	32.2	32.8	98	14.5	3.53	1	21828752	19579988	60
2.4	7.41	15	21	9.7	98	110	4.8	134	26.7	8.7	1.9	39	1.8	5	22.1	31.8	2	1.3176	0.6588	13.7982	18.3	0	0	240	95	104	133	4.2	19.9	32.6	32.6	100	30.1	2.67	1	21830766	16372063	69
4.3	7.4	14	26	8.4	106	137	3.6	146	26.4	7.7	1	26	2.5	3.8	15.8	28.4	1.5	1.492	11.563	13.428	37.3	0	0	52	16	108	28	2.7	0.8	30.9	29.2	106	20.4	2.49	1	21832921	16235105	70
2.3	7.35	8	23	8.6	98	98	3	129	23.1	8.3	1	24	2.3	3.9	13.1	29.5	1.2	0.25	0.02	0.68	1	0	0	45	166	524	242	1.9	23.9	27.9	35.9	78	17.4	2.97	1	21834040	10236942	64
2.3	7.4	17	17	7.6	100	77	2.3	130	37	12.7	0.8	27	2.1	3.5	12.2	38.9	1.1	2.037	0.291	24.444	29.1	0	0	80	200	863	613	2.2	16.5	31.3	34.3	91	23.9	4.06	1	21842934	14841920	60
3	7.32	16	16	7.7	123	168	6.7	151	37	12.2	0.9	24	1.4	3.8	14.6	24.5	1.3	3.208	0.401	18.045	40.1	0	0	519	20	87	15	3.8	0.2	28.8	33.1	87	15.8	4.25	1	21844199	13958076	60
2.2	7.45	13	25	8.7	105	85	3.4	143	29.7	9	0.6	9	2	4.1	23.2	45.1	2.1	5.1198	1.7388	8.5652	16.1	0.6	3	257	12	131	37	2.2	3.3	26.5	30.3	87	19.3	3.4	1	21860723	11245362	63
0.9	7.44	12	28	8.1	90	188	2.6	126	31.1	10.8	0.4	12	2	4.1	11.2	25.8	1	2.7729	0.585	8.2134	11.7	0.4	0.7	177	13	51	16	3.7	0.7	31.3	34.5	91	12.6	3.43	1	21878501	16195081	49
1.2	7.44	19	28	7.1	91	67	2.4	134	23.7	7.5	2.3	26	1.9	3.6	12.8	30	1.2	0.244	0.8296	10.98	12.2	0.1	0	89	91	548	238	2.8	0.8	28	31.6	88	20.9	2.68	1	21882253	10213338	48
3	7.41	15	17	7.7	108	179	5.5	140	31.4	9.7	1.2	20	1.8	4.7	12.9	31.1	1.2	0.83	0.9794	6.4325	8.3	0.1	0	245	210	83	344	3.4	0.5	32	30.9	104	13.3	3.03	1	21894721	10831977	78
2	7.44	9	29	8	123	164	4.3	158	35.6	10.3	0.8	53	2.2	3.4	10.7	28	1	1.746	1.455	22.698	29.1	0	0	339	30	89	31	3.7	0.8	29.4	28.9	102	16.5	3.51	1	21898544	15066521	91
1.8	7.4	16	22	7	101	209	4.2	139	26.5	8.5	1	15	1.7	3.3	12.7	29.8	1.2	0.19	0.03	0.66	1	0	1	105	13	73	18	2.6	1.1	32.3	32.1	101	16.2	2.63	1	21905130	11863409	72
3.2	7.23	15	15	7.4	120	112	3.3	146	34.5	10.8	1.4	13	1.7	3.7	14.5	42.2	1.3	0.52	0.44	18.94	20	0.2	0.4	64	23	177	26	2.2	0.2	30.5	31.3	98	17.2	3.53	1	21905572	10823560	91
4.2	7.07	19	16	6.5	110	179	7.2	140	35.8	10.8	1.9	48	1.5	4.9	12.2	35.5	1.1	0.384	0	12.288	12.8	0	0	379	85	144	153	1.5	0.2	28.5	30.1	95	15	3.79	1	21909820	11332825	73
9.7	7.42	23	19	9.3	86	222	7.3	124	27.2	9.3	4.2	157	2.9	4.1	30.9	68.1	2.9	0.572	0.9438	11.9548	14.3	0.3	5.5	69	106	108	174	3.3	14.3	36.8	34.1	108	16.2	2.52	1	21952008	19475346	67
4.5	7.38	12	29	8	96	134	2.4	133	25.5	7.3	0.6	21	2.1	3.6	30.9	40.6	3.1	0.4806	0.1869	8.1524	8.9	0.6	0.3	226	381	68	448	2.2	2.2	23	28.6	81	20.3	3.17	1	21959616	14186941	52
1.1	7.34	12	26	9	110	164	2.4	143	22.9	7.4	1.1	42	2	4.5	13.7	28.7	1.3	0.968	0.847	9.196	12.1	0	0	37	12	48	12	2.8	1.1	27.4	32.3	85	24.1	2.7	1	21976241	10177348	91
8.6	7.19	20	11	7.9	95	85	4.6	122	27.4	9.1	2.8	40	1.9	4.3	38.7	54.8	4	0.51	0.051	0.306	1.7	0	18	49	52	68	78	2	17.7	39.6	33.1	120	14.6	2.29	1	21980742	16215233	48
1.7	7.31	25	19	7.8	102	136	6.3	146	36	10.3	3.7	96	2.2	4.2	13.6	25.7	1.3	2.9346	0.7169	2.9212	6.7	0.2	0.2	82	8	89	8	3	0.6	25.6	28.6	89	21.3	4.03	1	21980743	18674404	91
2.4	7.45	18	20	7.5	99	142	6.9	133	29.2	9.6	2.4	48	1.8	4.2	20.3	38.3	1.9	0.5265	0.4225	5.5315	6.5	0.1	0.3	168	26	78	54	2.9	0.6	29.1	32.8	89	15.1	3.29	1	21982256	19578299	64
4.2	7.27	19	24	8.1	100	109	6.5	139	33.4	10.6	2.9	84	2.8	3.7	32.4	35.7	3.4	0.999	0.481	17.02	18.5	0.1	0	152	54	100	82	2.8	11.8	30.3	31.8	95	19.8	3.5	1	21985668	15789201	87
2.2	7.44	13	28	8.8	104	155	3.1	145	23.5	6.8	1	26	2.6	5.1	13.3	27.9	1.2	0.4263	0.9396	7.134	8.7	0.2	0.4	263	13	124	20	3.1	0.3	28.1	28.9	97	18.5	2.42	1	21988114	17745354	49
1.9	7.33	16	15	6.9	98	87	4.6	125	29.8	8.9	2.5	36	2.4	4.1	13.8	34.4	1.3	2.574	1.638	19.188	23.4	0	0	138	9	73	19	2.4	0.3	25.8	30	86	17.5	3.47	1	22024689	17408675	81
7.8	7.38	17	20	7.7	110	284	3.3	147	30.5	9.6	0.8	13	1.6	3.6	35	41.3	3.2	0.142	0.426	11.644	14.2	0	0	92	70	79	235	1.5	3.1	29.2	31.5	93	16.3	3.29	1	22031581	16909817	49
5.8	7.29	38	13	7.2	99	108	19.3	143	50.9	16.6	2.5	88	4.9	7.3	10.5	28.1	1	0.925	0	12.395	18.5	0	0	274	17	53	68	1.9	0.5	32	32.6	98	14.1	5.19	1	22032290	19382374	54
1.7	7.43	15	23	8.6	102	121	3.1	135	38.9	12.9	0.8	26	2.2	4.6	15.8	101.5	1.4	1.2576	0.8384	10.9254	13.1	0.2	0.5	201	78	66	481	3.7	1.2	31.5	33.1	95	14.8	4.1	1	22043112	17453351	89
7	7.15	28	17	8.7	105	385	6.1	147	51.7	14.7	1.7	22	2.3	3.4	13.5	38	1.2	2	1.125	8.625	12.5	0	0	187	309	135	611	3.3	0.5	27.9	28.4	98	13.9	5.27	1	22044163	11111102	86
1.8	7.39	10	23	8.2	115	230	3.9	144	38.3	12.2	1.3	45	2.6	3.8	12.9	28.6	1.2	2.128	0.6118	23.7538	26.6	0.4	0.2	74	58	80	48	2.4	0.4	33.8	31.9	106	13.1	3.61	1	22053079	10125876	56
1.5	7.33	17	18	7.4	107	135	6.5	142	21.1	7	6.6	67	2.6	5.3	19.5	24.4	1.8	5.706	19.654	2.219	31.7	0	4	24	24	103	44	4.7	0.5	29.9	33.2	90	18.2	2.34	1	22058285	16053387	77
1.9	7.49	15	34	8.4	92	126	4.1	138	32.1	10.8	2.7	49	1.9	3.4	18.2	51.3	1.7	0.444	0.111	10.212	11.1	0	3	163	28	101	67	2.5	1.1	33.4	33.7	99	17	3.24	1	22061082	11446293	75
0.7	7.24	17	12	7.7	113	108	6.7	139	23.2	7.4	2.8	69	2.5	4	11.8	27.4	1.1	1.083	0.437	7.885	9.5	0.2	0.2	120	16	324	26	1.6	0.2	27.9	31.9	88	16.8	2.65	1	22062066	16767959	40
0.9	7.36	12	22	7.6	108	154	2	139	27	8.6	0.5	9	1.6	3.4	24.7	35.6	2.4	0.3588	0.2496	7.1526	7.8	0.2	0.3	203	6	50	21	2.6	0.4	26.6	31.7	84	13.9	3.22	1	22066313	15662927	66
13	7.02	20	12	6	108	213	4	135	58.2	19	1.5	25	1.6	5.1	14.2	80.5	1.4	8.424	4.68	44.928	93.6	0	3	38	136	164	273	1.8	0.4	27	32.7	83	14.8	7.05	1	22067227	15510824	28
1.7	7.34	16	26	8.2	95	282	4.5	137	42.7	13.1	1.6	61	2.9	5.3	14.1	39.1	1.3	3.2548	2.0394	14.935	20.6	0.4	0.1	158	24	56	32	2.6	1.3	29.3	30.7	96	15.8	4.47	1	22071424	10097659	71
1.6	7.46	15	24	8.7	100	87	3.9	139	24.9	8	1.4	25	1.9	4.4	14.5	29.2	1.3	0.7553	1.0556	7.1162	9.1	0.3	0.5	389	32	200	119	2.3	0.9	28.5	32.1	89	19.1	2.81	1	22089377	15788406	74
3.1	7.35	4	28	8.6	119	104	3.1	151	31	9.2	0.8	41	2.3	4.7	23.6	28.3	2.2	0.3285	0.2847	6.6065	7.3	0.6	0	269	17	87	11	2.6	0.7	28.9	29.7	98	17.1	3.18	1	22096604	13610988	83
2.1	7.12	21	25	9.1	92	113	6	138	36.8	12	4.4	50	2.3	5.3	123.9	66.6	11.1	1.25	1.5	21.5	25	0	1	161	15	275	32	3.2	1.3	28.8	32.6	89	19.7	4.16	1	22098688	17100483	73
1.8	7.36	19	16	8.1	108	196	2.5	138	23.7	7.3	0.6	18	2.3	5	13.6	88.7	1.2	2.688	0.64	9.216	12.8	0	1	42	50	124	69	3.5	1.7	29.8	30.8	97	22.9	2.45	1	22100119	18023584	57
7.3	7.39	23	18	7.5	101	91	3.9	138	23.3	7.5	2.3	33	2.2	4.2	14.4	30.1	1.3	0.5246	0.5917	4.941	6.1	0	0	105	51	112	57	2.3	0.6	32.1	32.2	100	14.4	2.34	1	22124023	19914382	85
2.7	7.41	12	32	9.2	93	265	3.6	137	24	7.6	1.4	73	2.1	4.8	39.9	45.9	3.7	0.498	0.581	6.889	8.3	0	0	78	51	374	71	1.9	1	29.5	31.7	93	20.6	2.58	1	22159072	15406736	69
1.6	7.39	14	26	7.7	99	92	3.2	135	30.7	9.7	0.4	7	2	3.9	16.6	32.4	1.5	0	0.462	14.476	15.4	0	0	267	19	70	20	1.9	0.3	28.6	31.6	91	20	3.39	1	22161517	15660694	64
0.8	7.28	15	19	6.5	116	104	3	146	28.7	8.9	1.5	19	2.2	3.5	18.8	42.2	1.7	0.6545	0.253	4.5705	5.5	0.1	0.2	176	29	167	67	2.2	0.8	30.5	31.1	98	18.3	2.92	1	22172321	19466961	83
3.4	7.34	14	23	8.5	93	100	4.8	130	31.4	10.4	2.6	77	2.7	4	69.5	57.2	6.5	0.654	0.882	4.38	6	0.3	0.7	129	73	120	80	2.2	1.5	29.8	33.1	90	14.4	3.49	1	22173611	15008298	91
1.4	7.37	20	27	9.1	98	90	5.5	141	26.9	8.7	2.2	61	2.1	4.4	19	30.5	1.7	3.311	1.8662	24.381	30.1	0.4	1.4	298	7	70	37	2.2	8.3	28.4	32.5	87	15.8	3.09	1	22190274	10921618	55
0.9	7.45	12	20	7.3	111	165	2.1	139	33.3	11.6	1.6	19	1.9	3.7	13.8	26.1	1.2	1.2726	0.7434	10.5462	12.6	0.1	0.1	209	19	46	23	3	0.4	30.4	34.8	88	13.5	3.81	1	22211207	16981683	77
3.7	7.27	16	27	8.5	105	165	3.9	143	20.9	6.4	2.5	77	2.8	4.5	18.8	87.9	1.7	1.2125	0.5141	7.8376	9.7	0.2	1.2	279	18	148	31	2.8	0.9	29.3	30.5	96	19.8	2.18	1	22225318	16047293	71
1.7	7.26	16	19	7.3	111	57	7.7	142	26.1	8.3	5.5	95	1.8	3.7	15.6	83.1	1.4	2.16	0.9	13.86	18	0	0	293	4	66	13	1.3	0.2	31.8	31.9	100	18.5	2.62	1	22227663	18168234	64
0.7	7.27	22	17	5.7	103	195	6.3	142	29.7	9.3	6.6	58	2.6	5.1	13.4	38.1	1.2	2.261	0.798	9.443	13.3	0	3	69	24	724	162	2.6	3.7	26.6	31.3	85	20.2	3.49	1	22234109	16275349	55
4.7	7.29	16	24	8.6	125	292	2.1	165	37.4	11.8	1.9	47	2.1	4.2	17.2	25.4	1.6	0.294	0.084	3.108	4.2	0	1	133	445	99	864	1.9	0.5	29.4	31.6	93	17.7	4.02	1	22238108	15642980	71
2.3	7.28	22	26	8.1	92	253	5.3	135	32.7	9.6	3.5	54	1.4	5.2	20.5	32.2	1.9	0.74	0	28.86	37	0	0	278	38	98	183	2.8	1.1	24.4	29.4	83	18.3	3.94	1	22261237	17266453	55
1.2	7.43	15	26	8.6	97	108	3	134	26.6	8.6	3.5	30	2	3.7	14.9	44	1.4	0.9246	1.1926	10.7066	13.4	0.2	2.6	187	11	67	17	2.7	0.6	30.6	32.3	95	14	2.81	1	22270906	11745291	81
3.5	7.3	16	18	8.3	103	107	3.1	133	42.6	13.4	1	30	1.7	3.9	34.1	143.2	3.1	0.72	0.072	0.72	1.8	0	1	197	6	45	17	2.4	0.9	28.3	31.4	90	16.9	4.72	1	22277446	11191729	64
0.7	7.35	17	19	7.9	108	154	5.3	144	32.7	10.8	4	133	3.5	4.1	19.3	31.5	1.8	6.156	1.368	23.94	34.2	0	0	244	159	156	46	2.2	0.4	29.4	33	89	16.2	3.67	1	22286474	11573883	58
5.3	7.34	18	16	8.4	97	88	3.6	131	27.3	9.2	1.1	36	2.2	4.2	28.5	51.4	2.6	0	0.24	11.52	12	0	0	41	18	63	20	3.7	10.7	34.8	33.7	103	17.5	2.64	1	22290449	18006852	69
1.7	7.35	20	20	8.8	93	110	4.7	128	36.2	12.6	2.7	34	2.3	4.7	37.5	48.1	4	1.6464	1.8032	35.3584	39.2	0.3	0.8	203	14	172	772	2.9	11.3	30.5	34.9	87	16.4	4.14	1	22294846	10843788	83
2.5	7.35	16	24	9.2	103	137	1.4	143	21.2	7.1	0.4	7	1.8	3.2	33.1	48.6	3	1.469	0.339	8.814	11.3	0	1	136	45	131	111	3.6	24.1	35.3	33.5	106	23	2.01	1	22298651	13175257	39
4.4	7.38	19	17	7	84	53	4.3	116	33.6	10.8	2.5	37	1.3	3.8	35.5	51.2	3.3	0.21	0.056	0.812	1.4	0	1	13	33	61	139	2.2	7.7	31.8	32.1	99	19.4	3.39	1	22305515	19593730	56
1.3	7.29	13	22	7.8	106	93	3.8	141	25.2	7.9	0.6	9	1.8	4.3	16.2	27	1.5	1.7085	0.5202	2.7897	5.1	0.4	0.8	256	8	74	12	2.6	0.9	28.9	31.3	92	20	2.73	1	22307900	11017644	67
6	7.51	17	23	8.1	94	242	3	130	28.4	10.6	2.7	57	2.4	3.6	22.6	49.3	2.1	0.6208	1.0961	7.9734	9.7	0	0.1	50	17	100	36	3.2	40.7	34.8	37.3	93	15.6	3.04	1	22310263	17135164	45
5.1	7.28	23	23	10.5	99	125	5.5	140	45.7	15.9	2	39	2	5.2	14	25	1.3	0.756	0	4.59	5.4	0	0	153	28	105	44	4.6	1.2	33.8	34.8	97	13.9	4.71	1	22323020	12593920	79
1.5	7.42	11	28	8	100	222	3.8	139	23.3	7.6	1.3	28	2.4	5.2	13	26	1.2	0.944	0	0.649	5.9	0	0	43	23	77	16	3.4	0.2	32.3	32.6	99	17.4	2.35	1	22352127	17795477	88
1.8	7.48	14	19	8	108	127	2.5	136	31.4	11.1	1.7	41	2	5.3	12.6	23.4	1.1	17.702	0.334	12.692	33.4	0	0	154	125	227	69	1.5	0.7	33.1	35.3	94	18	3.34	1	22358755	11434633	87
2.4	7.39	20	21	8.4	110	96	5.9	147	23.4	7.5	3	57	2.2	3.5	10.5	28.1	1	0.129	0.387	12.126	12.9	0	0	159	13	73	27	3.2	1.3	32.1	32.1	100	19.9	2.34	1	22367422	19384482	76
1.2	7.31	19	20	8.3	101	107	6.5	136	29.6	9.1	1.9	81	2.2	3.5	17.3	46.9	1.6	1.134	0.5265	11.7315	13.5	0.3	0.4	326	8	147	17	3	1	29.3	30.9	95	17.3	3.12	1	22381828	15535789	81
2.1	7.41	22	14	6.5	70	69	6.4	106	32.8	11.9	3.9	67	2.3	4.9	21	36.8	1.9	1.314	2.628	51.246	65.7	1	0	81	10	169	52	2	4.5	32	36.3	88	13.6	3.72	1	22383141	15029036	61
0.8	7.16	18	16	8.6	100	110	8.3	134	31.5	9.7	4.8	56	2.1	4.8	12.1	62.5	1.1	1.5344	1.507	9.179	13.7	0.6	5.4	258	37	96	41	2.9	0.4	26.9	30.8	88	15.5	3.6	1	22384987	11928692	67
13.1	7.17	21	15	8.8	99	196	4.7	135	35.3	10.3	2	26	2.2	3.6	14.4	25.5	1.3	1.3	0.052	3.692	5.2	0	0	193	23	93	24	3.7	0.7	26.1	29.2	89	16.3	3.95	1	22422272	13171410	67
4	7.4	16	25	9.8	95	160	3.1	136	23.9	7.5	1.2	24	1.9	4.5	15	35.3	1.4	0.168	0.504	15.96	16.8	0	0	321	238	387	405	3.2	11.6	33.3	31.4	106	29.4	2.25	1	22439772	12862321	55
10.4	7.46	12	30	7.7	108	59	3.6	146	35.9	11.2	0.9	37	2.1	4.2	19.9	34.5	1.8	0.511	0.584	6.205	7.3	0	0	82	185	83	197	2.2	0.6	24.1	31.2	77	18.2	4.66	1	22445101	14257099	79
4.8	7.45	14	27	6.3	99	87	3.3	140	21.9	7.8	0.5	12	2.6	3.5	22.4	43.7	2.1	0.088	0.088	8.448	8.8	0	0	112	22	154	112	1.5	4.6	34.4	35.6	97	18	2.27	1	22449082	11666524	58
8.6	7.32	36	13	6.7	81	134	5.1	126	25.4	8.7	7.5	52	2.6	4.2	23.6	43.6	2.3	1.694	0.154	12.782	15.4	0	0	92	173	285	914	2.9	31.8	37.2	34.2	109	17.9	2.33	1	22451758	17725512	48
2.4	7.3	19	22	7.5	93	320	4.5	128	28.8	9.7	6.8	53	1.6	6.2	13.3	22.6	1.1	0.602	0.098	0.252	1.4	0	0	192	15	49	19	2.8	0.3	29.9	33.7	89	16.9	3.24	1	22459818	19394739	60
4.2	7.51	27	20	9.7	80	96	3.9	122	24.1	7.9	3.5	81	2.4	4.6	21	48.8	1.9	0.17	0.17	6.46	8.5	0	0	53	14	99	54	5.2	1.8	30.2	32.8	92	14.1	2.62	1	22461270	14021217	56
3.8	7.54	26	25	9.4	95	219	5.1	140	43.5	14.3	3.6	141	4	5.6	73.7	42.5	9.2	1.98	0.66	28.38	33	0	0	201	49	155	58	3.3	0.8	30.8	32.9	94	13.7	4.65	1	22468631	10406981	87
5.9	7.45	20	16	6.9	129	117	5.4	160	34.9	10	2.3	99	2.6	5.1	14.3	26.5	1.2	0.828	0.138	12.282	13.8	0	0	148	6	74	27	1.9	0.3	30.9	28.7	108	15.3	3.24	1	22470838	11814147	78
3.9	7.36	22	25	6	90	143	5.8	137	34.6	12.1	2.5	56	1.9	3.9	15.7	46.2	1.4	0.36	0.144	6.48	7.2	0	0	190	120	292	361	1.3	3.2	32.5	35	93	18.6	3.72	1	22476059	12701247	66
2.4	7.2	16	20	7.3	99	117	3.1	131	29.5	9.1	1.3	27	1.6	4.3	13.4	27.9	1.2	1.6416	1.3824	40.1328	43.2	0.1	0	116	33	104	37	1.9	7.5	30.7	30.9	100	17.4	2.96	1	22489365	15168227	60
2.6	7.45	13	28	8.1	106	125	3.2	144	24.1	7.9	0.3	9	1.7	3.2	10.6	24	1	3.267	0.99	5.049	9.9	0	6	475	80	58	40	2.5	0.3	30.5	32.8	93	14.2	2.59	1	22499620	13299672	34
2.1	7.31	20	17	8.2	98	104	8.6	130	22.7	8.1	1.9	23	2.3	4.5	15	40.5	1.4	1.43	0	26.026	28.6	0	0	50	19	78	43	2.2	8.2	31	35.7	87	15.1	2.61	1	22519384	14504850	68
1.4	7.32	20	11	7.8	112	107	4.9	138	26	9.7	2	42	1.6	5.1	16	35.5	1.4	1.704	1.176	20.952	24	0.1	0.4	335	14	183	28	2.6	0.5	29.1	31.5	92	15.3	3.33	1	22523435	15041169	82
3.3	7.32	15	18	7.2	112	214	2.6	141	33.3	10.7	0.8	14	1.3	4.2	13	150	1.2	1.1232	1.296	18.9216	21.6	0.3	0	204	25	56	40	2.8	0.5	29.2	32.1	91	13.8	3.66	1	22526777	15808752	71
1.2	7.34	12	20	6.9	107	112	1.7	134	24.4	8.6	0.6	12	1.8	4.7	13.2	28.9	1.1	0.46	0.08	9.44	10	0.1	0.2	323	33	68	58	2.6	0.4	31.4	35.4	89	15.7	2.75	1	22530355	11361363	47
1.3	7.32	15	24	8.3	105	201	4.5	139	29.3	8.6	3	48	2.5	5.2	17	23.4	1.5	1.168	0.073	5.913	7.3	0	0	231	18	60	23	3.9	0.5	23.5	29.4	80	16.8	3.66	1	22533821	13538053	73
1.7	7.33	18	19	8.2	100	90	5.9	137	23.2	7.7	3.5	79	2.1	5	15.2	35.9	1.4	1.4964	1.1832	8.6768	11.6	0.1	1.3	123	30	314	43	2.4	6.9	33.8	33.2	102	15.7	2.28	1	22542098	16502686	87
1.6	7.35	21	27	8.7	95	97	8	137	33.7	11.4	9.1	63	1.9	5.8	13.9	84.4	1.2	0.36	0.112	3.504	4	0.2	0.5	138	34	98	94	3.7	0.4	30	33.8	89	13.9	3.79	1	22548456	18318729	91
2.6	7.14	16	23	10.2	99	255	3.8	138	34.7	10.5	2.9	54	2.2	5.5	14.9	28.2	1.4	0.055	0.33	4.895	5.5	0	0	89	17	58	23	2.8	1	27.9	30.3	92	15.9	3.77	1	22551004	13030379	65
1.9	7.43	17	24	8.7	94	141	3.9	130	34.3	10.8	3.1	33	1.8	5.3	16.4	29.5	1.5	0.6708	0.7332	14.0088	15.6	0.2	1	331	13	117	18	2.1	1.2	28.4	31.4	90	15.3	3.79	1	22559532	18259917	69
4.7	7.2	28	12	6.2	110	121	5.4	143	48.3	17.7	2.2	17	1.9	6.6	37.2	45.4	4	1.615	0.3135	7.505	9.5	0.4	0.3	266	307	38	304	2.8	1.1	32.4	36.7	88	13.5	5.47	1	22571914	15410543	28
12.6	7.07	33	11	8	98	195	8.4	136	43.2	14.2	2.2	57	2.3	5.5	62.7	75.3	5.6	2.17	4.34	34.72	43.4	0	1	308	79	291	190	3.1	1.7	30.9	32.9	94	16.2	4.59	1	22578133	10801454	81
2.8	7.38	17	23	8.5	95	156	3.6	131	38.7	12.5	2.4	32	1.7	4.2	16.5	35.1	1.5	0.349	2.094	31.061	34.9	0	0	208	127	875	204	2.1	16.7	28.7	32.4	89	15.9	4.37	1	22579763	16794039	60
2.1	7.34	20	17	7.8	101	144	6.3	134	27.2	8.9	3.9	79	2.1	4.3	15.8	43.8	1.5	0.195	0.195	4.16	6.5	0	1	51	354	123	314	2.2	4.9	32.6	32.6	100	17.2	2.72	1	22584136	10691024	80
1.7	7.34	13	15	8.1	114	170	2.7	138	32.6	10.4	2.2	88	2.2	4.1	41.5	40.8	4.6	0.684	0.2394	16.1766	17.1	0.1	0	113	27	290	37	2	0.9	28.1	32.1	88	17.4	3.71	1	22585362	11849930	91
3.1	7.47	17	27	8.1	95	146	1.5	136	23.3	7.8	3.7	34	2	3.3	12.8	27.7	1.2	0.078	0	0	0.6	0	0	25	17	55	44	3	0.8	32.2	33.6	96	19.9	2.43	1	22585643	15499728	45
3.2	7.43	17	32	10.8	98	185	2.6	147	37.7	11.8	1	39	2.3	4.3	11.9	40.5	1.1	0.442	0.068	2.516	3.4	0	2	155	51	81	42	3.9	0.7	30.8	31.3	98	16.7	3.83	1	22585845	10608802	87
1.4	7.22	7	19	7.7	107	164	5.6	133	31.1	10.4	2.1	74	3	5.2	11.6	26.4	1.1	0	0.295	27.435	29.5	0	0	145	16	59	37	2	1.2	32.5	33.4	97	15.1	3.2	1	22600297	16343783	67
1.4	7.34	9	33	6.5	98	96	3.4	137	34.7	11.3	0.9	7	1.5	3.3	13	43	1.2	0.4074	0.2328	9.021	9.7	0	0.4	338	10	91	9	2.3	0.2	30.7	32.5	94	16	3.68	1	22615619	17873707	48
1.8	7.29	15	13	8.5	108	67	3.8	133	22.1	7.2	3.1	9	1.6	3.4	35	92	3.1	2.331	0.756	9.2358	12.6	0.2	1.1	40	22	53	43	2.4	3.5	30.5	32.6	94	18.6	2.36	1	22615825	15476956	34
2.1	7.39	14	25	7.6	105	164	3.6	139	36.6	11.3	2	45	2.1	4.6	16.3	72.6	1.5	0.9009	0.385	6.2524	7.7	0.2	2	32	190	149	352	2.3	3.5	30.4	31	98	17.4	3.73	1	22616350	16747881	70
2.1	7.33	23	18	9.8	102	130	5.8	137	29.2	9.3	6.1	75	2.5	6.1	45.7	40.9	4.1	0.189	1.89	16.065	18.9	1	1	321	65	215	144	3.4	1.2	26.5	31.8	83	15.9	3.51	1	22625515	14530333	80
2.8	7.31	14	14	8.7	102	135	5.3	130	22.3	7.6	6.1	97	2.4	6	14.6	32.3	1.3	0.936	0.6084	9.594	11.7	0.4	3.5	68	41	189	58	2.9	2.4	30.5	34.1	90	18.8	2.49	1	22631445	18253389	46
2.3	7.22	14	17	8.9	117	91	3.5	144	34	11.1	1	39	1.7	3.5	12.6	42.5	1.2	0.36	0.036	2.736	3.6	0	0	258	30	107	56	1.6	1	30.5	32.6	93	14.8	3.64	1	22636793	13370871	83
3.6	7.41	13	20	8.6	103	96	3.3	130	23.8	7.6	1.6	30	2.1	5.6	33	101.2	3	7.105	2.205	14.455	24.5	0	3	97	25	92	57	2	1.9	37.3	32	117	19	2.04	1	22639118	14873817	52
2.3	7.5	21	23	9.5	109	168	5.8	148	33.4	10.5	3.7	110	2.6	4.5	14.4	34.6	1.3	1.1394	0.9284	18.7368	21.1	0.2	1.2	305	47	190	87	2.7	0.7	30.2	31.4	96	21.6	3.47	1	22644952	10212705	70
5.8	7.25	17	23	9.5	101	254	2.2	137	40.1	13	2	31	2.1	3.7	10.9	42.6	1	0.212	0.636	14.416	21.2	0	0	162	8	139	54	2.8	0.5	32.7	32.5	101	17.4	3.99	1	22645798	10069423	82
1.8	7.49	13	26	7.9	103	181	2.9	138	32.8	11.1	0.7	9	2.2	4.1	12.9	26	1.1	1.023	0.775	13.6865	15.5	0.1	0	367	25	71	32	2.2	0.3	27.9	33.7	83	13.8	3.96	1	22669220	13266095	83
1.4	7.42	15	23	9.2	102	156	3.8	135	33.2	10.7	1	18	1.8	4.5	17	91.2	1.6	0.5488	0.3332	18.4436	19.6	0.1	1.4	352	12	124	27	3	0.6	26.8	32.2	83	16.4	4	1	22672422	19654837	68
1.3	7.43	12	29	8.3	100	114	2.1	137	31.5	10.4	0.4	8	1.9	4	14.3	26.2	1.3	0.99	1.188	16.236	19.8	0	2	371	37	156	42	3	0.3	28	33.2	84	14.3	3.73	1	22677714	16258874	72
2.4	7.35	15	26	9	103	101	3.5	141	28.1	8.2	2.7	88	2	3.4	18.7	86.1	1.7	0.414	0.966	12.42	13.8	0	0	145	41	79	39	2.2	1.7	21.8	29.4	74	19.2	3.78	1	22679987	18172330	69
2.9	7.36	15	23	8.1	98	124	2.5	133	30.2	10.8	0.8	19	1.3	3.2	21.4	35	2	0.27	0.24	1.53	3	0	0	236	24	79	21	2.2	0.3	31.1	35.8	87	16	3.47	1	22681140	18210656	60
1.1	7.39	12	28	7.3	98	88	4.1	134	25.4	7.9	0.9	58	2.3	4	19.6	39.7	1.8	0.41	0.246	7.38	8.2	0	2	552	26	97	47	2.2	3.7	29.6	31	95	16.1	2.66	1	22689342	11343907	78
1.3	7.31	22	21	8.4	112	224	5.3	151	28.5	8.1	2.3	93	2.1	4.3	13.8	81.2	1.3	1.0974	0.5332	4.3462	6.2	0.6	1.8	202	116	371	41	3.3	0.4	22.7	28.4	80	21.3	3.57	1	22692043	19631559	63
2.2	7.5	18	20	8.1	103	255	3.2	137	33.9	11	1	31	2.3	3.5	12.9	52.1	1.2	0.828	0.138	5.865	6.9	0	1	108	41	26	152	4.2	1.9	33.4	32.3	103	21.8	3.28	1	22694726	14055524	64
1.3	7.4	11	37	8.8	93	151	5.3	141	24.5	7.3	0.8	43	2.6	4.2	16.2	150	1.5	0.196	0.196	2.352	4.9	0	0	191	13	49	31	2.7	0.4	28.4	29.8	95	15.1	2.57	1	22718263	18570563	65
2.3	7.54	15	18	8.5	104	143	2.7	133	33.4	11.5	0.7	31	2	3.8	15	23.1	1.4	0.9546	1.7802	23.0136	25.8	0.1	0.1	128	30	211	60	2.9	0.5	30.6	34.4	89	13.6	3.75	1	22722402	19473155	81
1.3	7.23	21	19	8.7	101	77	3.8	136	26.9	8.6	0.3	22	1.5	4.5	11.4	30.8	1.1	0.039	0.039	3.237	3.9	0	0	242	13	88	49	2.7	0.2	37.7	32	118	13.3	2.28	1	22725279	12917345	55
1.1	7.48	11	25	7.8	102	112	2.5	134	26.9	9.4	1.7	42	1.7	3.9	20.6	32.1	1.9	0.832	0.064	1.856	3.2	0	0	91	94	59	76	3.1	0.4	34.9	34.9	100	23.2	2.69	1	22737488	19423261	85
5.2	7.38	11	33	8	101	148	5.4	141	26.8	9	1.3	31	2.3	4.1	12.7	26.8	1.1	1.7372	0.3535	7.676	10.1	0.3	3	86	98	234	103	4.1	1.8	21.3	33.5	63	15.7	4.23	1	22752450	17472265	74
2.6	7.3	14	22	7.7	100	98	7.5	136	24.3	8.5	4.5	104	2.5	5.9	21.5	39.3	2	0.9212	1.568	16.1112	19.6	0.2	1	87	28	109	100	2.9	22.2	30.6	35	87	20.2	2.78	1	22752628	11557186	72
5.4	7.4	16	22	7.4	110	115	4.7	144	21.2	6.7	1.7	84	1.9	3.9	17	38.2	1.6	0	0.216	14.904	21.6	0	0	326	31	546	40	1.8	0.9	27.5	31.6	87	18.8	2.44	1	22772729	12276384	83
6.7	7.07	16	17	8.4	115	61	2.7	148	42.4	13.5	2.5	27	1.6	4.4	22	65.6	2	0.21	0.252	3.654	4.2	0	1	42	86	75	195	2.8	3.1	30.3	31.8	95	17.2	4.45	1	22775761	14537549	85
1.6	7.43	12	24	10.5	112	95	3.8	144	30.4	10	0.8	22	2	3.8	14.1	25.4	1.2	0.108	0.324	9.396	10.8	0	1	191	23	203	83	2.3	1	30.2	32.9	92	18.5	3.32	1	22776230	18575294	83
7.8	7.45	22	16	8.3	106	53	2.2	140	33.4	11.9	3.6	35	1.7	4.1	23.5	52.3	2.1	0.846	1.692	24.534	28.2	0	0	119	623	200	332	2.3	28.1	25.6	35.6	72	21.2	4.64	1	22784735	13601656	63
1.3	7.63	12	20	8	106	97	2.8	138	28.2	9.4	0.4	9	2.5	3.8	15.1	22.2	1.4	2.2015	0.9639	8.6037	11.9	0.3	0.4	268	55	197	26	3.2	0.2	29.3	33.3	88	16.6	3.21	1	22787930	11521532	65
8	7.05	16	10	5.6	120	389	4	140	51.4	16.7	1.1	14	1.2	5.8	14.9	44.3	1.4	1.38	0.075	0.015	1.5	0	0	207	45	95	143	1.7	0.8	31.1	32.4	96	12.5	5.35	1	22790697	17096436	56
2.5	7.44	18	13	7.5	97	131	3.1	124	37	12.3	2.7	38	1.8	3.7	20.9	31.3	1.9	0.995	0.199	18.308	19.9	0	0	176	154	230	365	2.4	18.9	37.5	33.2	113	17.9	3.27	1	22791685	16536220	46
1.8	7.24	18	20	8.4	98	225	5.6	130	23.8	7.5	1.9	71	2.5	5.6	40.1	27	3.8	0.015	0.015	0.24	0.3	0	0	191	40	135	51	2.8	0.2	30.7	31.5	97	20.7	2.45	1	22801808	15991068	69
2.4	7.42	17	18	8.5	111	152	4.2	142	24.8	8.1	3.6	119	1.8	3.5	19.1	37.2	1.7	1.147	0.444	16.6685	18.5	0.2	1.1	103	125	137	77	2.9	0.6	28.6	32.5	88	16.9	2.81	1	22809535	10952108	88
11.5	7.3	16	19	9.6	92	136	3.3	122	30.3	9.6	0.8	19	1.7	4.7	26.5	59.8	2.5	1.727	0.616	3.1185	5.5	0.4	0.2	36	172	189	435	2	9	33.6	31.6	106	19.7	2.85	1	22818855	13976080	63
1.5	7.42	10	28	8.3	115	181	2.4	150	32	10.5	0.8	39	2	3.3	12.3	25.1	1	0.897	0.1932	12.6132	13.8	0.1	0.6	278	107	251	66	2.2	0.3	29.9	32.9	91	14.4	3.53	1	22819091	15288644	91
2.1	7.3	15	19	8	99	178	5.3	129	30.9	9.4	5.8	54	2	3.7	15.6	43.7	1.4	1.2201	0.8964	22.659	24.9	0.4	0.1	51	50	111	155	2	6.7	29.8	30.4	98	16.2	3.15	1	22826044	10442543	59
1.7	7.46	12	25	7.3	107	122	1.8	140	25.7	8.9	0.5	23	1.7	3.9	11.7	34.1	1	0.012	0.012	0.252	0.4	0	0	33	84	335	80	2.2	1.6	31.6	34.5	91	14.9	2.82	1	22856743	16834971	73
2.8	7.5	15	19	8.3	109	102	2.3	138	31	10.9	1	28	1.7	5.1	18.6	37.4	1.7	1.2616	0.5312	6.4657	8.3	0.1	0.5	225	36	91	87	2.6	4	33.2	35.2	94	19.6	3.29	1	22869196	15545482	66
2.9	7.35	16	20	7.6	103	243	4.2	134	30.2	9.2	1.6	61	2	4.7	13.4	36	1.1	0.666	0.555	9.657	11.1	0	0	179	21	81	31	1.5	2.9	22.3	30.6	73	18.8	4.13	1	22875567	14483533	80
4	7.47	9	24	7.7	103	148	2.6	136	25.4	8.7	1.2	51	2.9	4.4	15.9	27.5	1.5	0.253	0.011	0.759	1.1	4	0	18	18	56	13	2.6	3.7	30.2	34.3	88	15.3	2.88	1	22892700	17220922	75
2.8	7.29	9	19	7.9	110	101	4.7	134	30.5	9.9	1.2	42	1.9	3.9	19.4	51.2	1.8	0.6867	0.2331	5.2227	6.3	0.3	2.2	224	20	62	14	2.2	0.2	30.7	32.4	95	15.1	3.22	1	22897011	15796578	82
4.9	7.3	19	17	7.5	96	135	4.6	126	28.8	9.5	0.8	73	2.3	5.5	16.6	36.7	1.5	0.592	0	6.216	7.4	0	0	49	87	540	140	2.5	0.7	29.6	32.8	90	16.8	3.19	1	22909204	15536315	28
6.8	7.5	11	24	8.2	108	155	3.3	140	32.6	10.7	0.7	11	1.6	3.4	14.9	54.9	1.4	0.742	0.477	3.975	5.3	0	0	119	21	102	40	2.6	0.7	29.5	32.7	90	14.9	3.62	1	22944314	16225498	84
2.4	7.44	9	26	8.4	105	123	2.6	140	23.9	8.2	0.9	31	2.3	3.6	15.1	38.9	1.4	3.8745	1.722	22.9887	28.7	0	0.1	125	8	97	27	2.6	3.2	32.9	34.3	96	16.3	2.49	1	22946143	13795994	63
1.5	7.45	13	23	7.5	99	101	3.6	131	19.1	6.6	1.8	39	1.5	4.3	12.7	33.5	1.2	0.02	0.08	0	0.1	0	0	39	12	43	17	2.6	0.5	28.7	34.7	83	16	2.31	1	22950906	14606575	88
2.1	7.49	6	36	7.8	98	217	1.9	136	24.9	7.8	0.2	18	1.9	3.9	11.4	43.9	1.1	0.7104	0.2816	5.3568	6.4	0.3	0.5	109	60	143	77	2.1	0.4	26.1	31.3	84	17.5	2.98	1	22954561	19039643	79
2.1	7.33	12	21	8.4	103	78	3.9	136	19.3	6.4	1.2	42	2.2	5.2	24.4	54.7	2.3	0.5472	0.4104	2.6828	3.8	0.4	3.4	64	30	257	67	3.3	11.3	33.5	33.2	101	22.2	1.91	1	22961244	13093718	67
2.3	7.3	15	17	7	111	202	4.7	139	29	8.8	1.1	46	2.2	4.4	20	96.3	1.9	1.4796	1.4796	24.0024	27.4	0.2	0.2	371	17	64	44	1.8	0.4	27.2	30.2	90	16.3	3.23	1	22986918	17955142	72
4.7	7.33	19	19	8.3	90	139	6.6	128	28.5	9.1	2.1	55	2.4	5.3	23.9	39.1	2.2	1.1985	1.3515	22.644	25.5	0.1	0	233	56	206	67	2.9	22.9	29.3	31.9	92	18.5	3.11	1	22989281	13580257	62
2.8	7.45	18	17	9.1	99	158	5.1	134	28	9.1	1.5	49	2.3	4.4	41	36.8	3.8	1.6416	1.6128	24.336	28.8	0.4	0	101	14	80	25	3.2	1.9	27.8	32.5	86	18.2	3.27	1	22990666	14513810	71
0.9	7.3	8	32	7.3	103	130	2.2	143	24	7.4	0.8	45	2.2	3.6	17.3	25.9	1.6	0.2314	0.534	7.5294	8.9	0.4	4.4	178	24	166	40	2.4	0.3	29.2	30.8	95	14.8	2.53	1	22999142	18275245	56
2.3	7.15	13	25	7.9	101	112	6.6	139	30	9	2.8	69	2.4	5.7	14.6	34.6	1.3	7.595	0.93	6.665	15.5	0	0	247	143	100	81	2.9	1.1	30.5	30	102	14.2	2.95	1	22999867	19506489	70
2.7	7.43	15	21	6.9	99	111	3	131	28.9	9.9	2.2	33	1.5	4.2	14.9	45.1	1.4	0.6952	0.6399	6.5017	7.9	0.3	0.5	104	18	65	34	3.5	2.3	35.7	34.3	104	20.2	2.78	1	23003466	15844687	76
1	7.65	30	30	9.2	88	171	3.4	148	32.8	9.6	5.8	37	1.7	3.7	15.7	25.4	1.4	1.6271	3.3156	25.1126	30.7	0.1	0.9	453	9	561	13	2.1	0.7	25.5	29.3	87	17.2	3.76	1	23005038	10059406	64
1.8	7.39	17	27	8.1	97	146	1.7	137	27.8	8.3	1.3	7	1.9	3.5	16.5	96.3	1.5	0.147	0.245	4.459	4.9	0	1	77	11	83	25	3.2	0.5	28.1	29.8	95	16.2	2.94	1	23007640	12805811	55
5.7	7.29	23	17	9.1	125	100	7.5	160	22.5	6.7	5.6	125	3.2	5.3	16.7	29.9	1.5	0.382	3.056	19.1	38.2	0	0	247	31	97	43	1.7	0.7	28.5	29.6	96	16.4	2.34	1	23024138	11526980	89
4.1	7.45	18	22	8.7	110	209	4.5	146	25.3	8.2	2.9	113	2	3.5	15.2	35.5	1.4	0.252	0.252	10.08	12.6	0	2	148	17	121	29	2.6	0.5	27.3	32.5	84	18.8	3.02	1	23030826	10950843	83
2	7.39	20	17	7.5	107	215	4.6	140	25.8	8.5	2.7	54	2.1	4.3	21.5	36.4	2	0.446	0.446	20.07	22.3	1	0	46	397	99	290	2.1	2	31.6	32.9	96	15.6	2.69	1	23059383	18367777	72
2.1	7.36	14	19	7.8	118	305	2.1	147	30.3	10	1.4	46	2.2	3.5	19.3	48.8	1.8	0.1962	0.2268	1.1412	1.8	1.1	11.4	31	16	64	26	4.2	1.6	31.7	33	96	17.1	3.15	1	23063105	12173360	67
2.5	7.46	14	21	7.3	111	122	1.7	142	30.9	10.6	0.4	12	1.6	3.9	19.9	28.6	1.8	0.712	0.801	7.209	8.9	0	0	74	32	152	113	2.3	7.3	35	34.3	102	23.7	3.03	1	23065690	11168650	52
6.4	7.38	20	13	8.1	104	164	4.4	131	40.8	13.4	1.8	37	1.8	5.5	22.2	36.2	2.1	0.166	0.83	6.059	8.3	0	0	47	16	90	28	2.6	4.4	33.3	33	101	14.6	4.03	1	23065855	16322291	71
3.9	7.47	16	28	10.3	99	101	4.8	138	40.9	13.3	2	70	2.6	5.3	29.6	41.9	2.9	1.2835	0.3624	13.3182	15.1	0.2	0.6	150	19	98	30	2.5	2.7	32.4	32.6	99	21.1	4.12	1	23074776	13563490	82
1.9	7.31	21	14	8.7	101	125	3.2	136	39.1	13.2	1.1	19	1.6	4.6	11.2	26.3	1	1.071	1.071	11.016	15.3	1	0	135	36	126	91	3.4	0.3	32.1	33.8	95	13.2	4.11	1	23077086	11960982	59
1.7	7.25	16	18	8.8	98	141	1.6	132	23.8	8.2	1.6	13	2.1	3.1	51.9	61.7	4.8	0.834	1.9321	10.8976	13.9	0.4	0.5	80	20	126	112	2.5	34.8	33.7	34.5	98	19.3	2.43	1	23078405	18582848	48
1.5	7.49	14	26	8.1	102	86	2.7	138	29.7	9.4	0.4	12	2.4	3.5	13.9	58.1	1.3	0.693	0.693	5.775	7.7	0	2	110	18	83	76	2.4	0.5	31.2	31.6	99	17.2	3.01	1	23085350	15311611	64
1.2	7.33	17	16	7.5	99	228	3.8	127	32.5	10.6	3.2	72	2.3	5.1	11.4	25.5	1.1	1.0836	0.4988	15.48	17.2	0.2	0.5	576	38	144	28	2.4	1	32.6	32.5	100	12.6	3.24	1	23092612	13199031	64
1.5	7.45	15	34	8.7	83	112	3.4	132	24.8	7.6	1.8	68	2.1	3.6	15.8	32.9	1.5	0.8455	0.437	8.132	9.5	0.1	0.3	118	19	240	23	3.7	1.1	29.6	30.6	97	19	2.57	1	23098609	15452777	67
1	7.35	15	18	7.6	98	122	3.7	127	27.1	9.2	2.1	24	2	4	13.5	33.2	1.2	1.35	0.775	22.775	25	0.1	0.3	358	10	91	20	1.7	0.4	26.6	34.1	78	17.1	3.48	1	23098774	10815009	71
0.9	7.32	16	23	8.1	97	93	4.6	132	31.8	9.9	5.7	47	1.4	4	14.1	31.4	1.3	1.1742	0.6489	8.3739	10.3	0.4	0.6	168	25	109	34	2.1	0.5	26.1	31.1	84	16.6	3.78	1	23100249	13567471	67
3.5	7.41	21	16	5.5	113	167	9.6	145	26.4	8.9	3.6	159	3.5	5.2	22.9	34.9	2.2	0.5115	0.5115	15.4605	16.5	0.1	0.1	55	33	149	84	2	12.4	31.1	33.8	92	19.7	2.87	1	23103446	15178361	53
1.2	7.3	14	25	9.9	104	113	4.3	138	50.9	16.3	1.3	28	2	4.6	11.6	24.7	1.1	0.346	1.1591	15.6565	17.3	0.2	0	208	32	75	40	3.8	0.9	30.6	32	96	14.9	5.33	1	23118531	12710627	73
0.9	7.25	9	31	9.2	111	142	4.9	148	24.4	7.9	1.2	51	2.2	3.3	17.2	41	1.6	0.1449	0.1323	6.0039	6.3	0.1	0.2	419	53	82	60	2.8	0.5	31.7	32.3	98	15.5	2.48	1	23119005	15718906	86
1.3	7.41	18	26	7.9	92	96	3.9	132	27.8	9.9	2.8	97	2.2	3.7	23.1	34.9	2.2	0.5369	0.364	8.1081	9.1	0.1	1	84	19	61	58	2.9	1.2	30.8	35.7	86	19.1	3.22	1	23121624	11266938	82
1.6	7.4	9	27	7.2	106	138	2.8	142	25.5	8.6	0.9	35	1.8	4	26.3	98.8	2.4	0.158	0.158	15.01	15.8	0	0	238	14	76	24	2	3	30.7	33.7	91	15.1	2.8	1	23122932	11144021	78
1.1	7.5	15	23	8.5	102	157	2.8	136	33.5	9.9	2.6	15	2.2	4	27.7	69.5	2.7	0.5513	0.3576	13.9613	14.9	0	0.1	215	12	112	27	2.6	0.4	29.5	29.6	100	18.4	3.36	1	23125140	15039574	91
0.8	7.3	20	25	8.2	94	125	5.9	139	30.5	9.3	3.6	73	2.1	3.7	14.6	29.7	1.3	1.1466	0.9072	9.9162	12.6	0.2	2.9	269	17	81	28	2.6	1.8	25.6	30.5	84	15.9	3.63	1	23125162	17840551	41
1.1	7.33	10	23	7.5	111	141	3.4	140	27.2	8.6	0.5	7	2.1	3.9	11.8	33	1	2.7456	0.1716	2.1216	5.2	0.8	2.3	184	9	79	16	2.1	0.2	29.2	31.7	92	16.2	2.96	1	23132889	13651475	88
1.4	7.39	17	19	7.3	101	95	3.9	133	25.6	7.8	1.5	40	1.6	4.4	14.2	32.3	1.3	0.5776	0.6992	29.0928	30.4	0.1	0	473	6	99	22	3.2	0.7	28.5	30.4	94	16.7	2.73	1	23138992	19937623	83
1.5	7.43	17	25	8	90	150	3.9	128	28.4	9.4	5.2	44	2.2	4	17.3	70.8	1.6	0.5076	0.564	12.8733	14.1	0.2	0.3	88	22	106	31	2.7	1.8	29.7	33.1	90	14.3	3.17	1	23141144	11492213	54
2.8	7.41	15	21	7.2	106	212	1.8	138	30	9.7	1.6	29	1.3	3.7	14	22.1	1.2	1.656	0.4761	18.2988	20.7	0.2	1	260	15	117	23	2.3	0.6	32.5	32.2	101	17.1	2.97	1	23155418	18461025	75
1.7	7.35	20	20	9.2	99	194	2.8	139	35.2	10.7	0.8	12	2.1	3.6	13.1	96	1.2	0.5056	1.5642	13.4142	15.8	0.1	0.7	103	19	136	34	3.6	0.9	28	30.4	92	19.9	3.82	1	23158537	13188963	62
3.8	7.3	15	17	9.5	104	92	3.6	131	30.4	9.6	1.1	15	2.4	4.7	25.4	41.9	2.4	3.729	3.729	22.713	33.9	0	3	81	322	165	811	2.9	14.4	33.9	31.7	107	23.8	2.83	1	23162521	11803145	52
1.1	7.27	13	20	7.1	100	239	3.7	133	33.8	10.7	1.9	34	1.4	4	14.4	27.6	1.3	0.767	0.5015	4.307	5.9	0.2	1.2	76	21	35	13	2.4	0.2	26.8	31.7	85	14.6	4	1	23166395	10787182	73
1.2	7.49	13	30	8.3	101	103	5	144	34.4	9.7	2	40	2.2	4.1	13	34.2	1.2	0.518	0.714	5.558	7	0.4	1.7	146	8	80	12	3.2	0.6	27.5	28.2	98	19.1	3.53	1	23171139	17402949	58
3.5	7.34	20	26	9.3	97	93	3.3	139	24.5	8.2	2.4	35	1.9	4.4	24.2	41.4	2.2	1.24	1.705	11.16	15.5	1	5	78	14	66	90	3.4	36.9	31.3	33.5	94	17.5	2.62	1	23175154	18744660	55
4	7.38	14	20	7.9	101	95	2.9	131	20.5	6.8	0.9	13	1.5	3.7	24	48	2.2	0.56	1.12	21.84	28	0	0	8	15	133	19	2.6	1.4	29.2	33.2	88	16.9	2.33	1	23184122	18355161	83
1.9	7.31	14	20	6.9	111	108	4.3	141	30.2	10.5	1.9	32	1.4	3.9	17.4	31.6	1.6	1.54	0.924	11.55	15.4	0	0	195	24	42	27	2.5	1	32.8	34.7	95	14.2	3.19	1	23187370	15928447	91
4.4	7.32	18	16	8.2	104	153	5.1	133	27.5	8.8	1.4	26	2.1	4.6	16.5	53.3	1.6	0.111	0.111	9.213	11.1	0	0	147	43	58	39	2.7	1.6	26.6	32.1	83	17.2	3.31	1	23187473	15758946	68
4.5	7.44	21	17	6.4	90	349	3.2	128	22.8	7.6	1.5	22	2	3.4	14.1	36.4	1.3	0.78	0.26	24.7	26	0	0	291	55	191	47	2.1	1.4	27.9	33.3	84	14.3	2.72	1	23197270	11851915	62
8.4	7.03	23	10	6.4	105	55	5.7	133	43.5	13.4	1.6	32	1.9	5.2	27.9	44.6	2.6	1.245	0.747	15.936	24.9	0	0	169	211	80	547	2.6	1.5	31.8	30.8	103	12.7	4.21	1	23220933	11814026	84
1.3	7.24	18	21	9.8	108	75	6	142	23.6	7	1	33	1.7	4.7	9.7	44.7	0.9	0.256	0.136	7.496	8	0.1	0.1	154	64	182	40	3.7	0.2	31	29.7	104	15.8	2.26	1	23227370	12579086	78
1.7	7.35	14	25	7.5	103	94	2.4	138	20	6.8	0.9	9	1.6	3.7	11.9	32.5	1.1	1.435	0.861	24.682	28.7	0	1	230	46	434	112	2.2	10.3	35.6	34	105	16.5	1.91	1	23230933	17016980	54
1.3	7.47	15	38	8.9	94	143	4	143	52.8	16.3	1.2	54	1.7	3.8	20.4	37.3	1.9	0.74	0.74	16.095	18.5	0	1	224	70	53	72	2.5	3.7	26.3	30.8	85	15.3	6.19	1	23239452	18496288	43
0.6	7.38	17	18	8	121	118	3.3	152	32.2	10.5	2.6	91	4.2	4.1	21.5	53.9	2	0.93	0.31	13.02	15.5	0	2	130	3	79	13	3.2	0.2	29.3	32.7	90	15.9	3.59	1	23245888	19533878	74
2.1	7.47	13	24	8.2	102	101	3.2	139	31	10.5	1.5	21	1.4	4	21.2	35.2	1.9	1.058	0.575	2.7646	4.6	0.7	3.3	69	17	110	34	3.1	6	35.7	33.9	105	15.3	2.94	1	23264545	11444719	61
1.6	7.34	10	30	9.1	95	87	3	135	33.7	9.7	2.2	17	1.8	3.7	15.4	36.3	1.4	0.5952	0.7296	17.3184	19.2	0.2	1.6	167	43	160	18	1.8	0.3	28.4	28.8	99	21.1	3.42	1	23267547	17910586	60
1.4	7.33	15	19	9.6	102	78	4.1	136	23.9	6.8	2.8	29	2.1	4.3	12.4	27.8	1.1	0.428	0.428	9.202	10.7	0	1	330	8	179	13	2.7	0.3	28.5	28.5	100	19.7	2.39	1	23283649	16825279	41
2.2	7.27	12	18	7.6	100	83	2.6	126	24.9	8.5	2	15	1.8	3.7	22.2	54.1	2.1	2.378	0.3248	8.7	11.6	0.8	0.8	49	22	73	62	3.7	2.6	31.3	34.2	91	15.6	2.73	1	23284776	10082560	86
4.8	7.36	19	20	9.2	101	130	2.8	135	30.4	10.2	1.2	28	2.1	4.5	24.6	37.6	2.2	112.424	2.444	7.332	122.2	0	0	138	4	57	13	4.1	0.8	31.3	33.4	94	15.1	3.24	1	23294713	18087450	91
1.5	7.48	15	26	9	89	125	2.4	126	31.7	10.8	0.9	19	1.6	4.3	14	28.1	1.3	2.0368	1.4606	9.6614	13.4	0.2	1	381	13	116	16	3.5	0.3	29	34.1	85	15	3.72	1	23301166	11103915	91
0.8	7.16	12	31	9	99	82	3.6	138	35.9	11.5	0.5	15	2.2	4.4	22.1	28.6	2.1	1.1285	0.999	16.206	18.5	0.2	0.7	501	14	174	32	3.3	0.3	23.4	32	73	15.3	4.9	1	23326088	10680821	65
2.1	7.39	18	20	7.2	101	199	4.7	139	24.8	8.2	2.8	46	2	4.6	18	45.8	1.7	3.7074	0.7104	16.3392	22.2	0.1	2.6	376	11	86	16	3	0.2	29.1	33.1	88	17.5	2.82	1	23337909	18904256	74
4.7	7.33	17	16	9	107	147	4.7	140	29.2	9.1	3.8	71	1.6	4.7	16.7	31.8	1.5	1.476	1.025	17.6915	20.5	0.2	0.3	283	10	82	22	2.3	0.3	31.6	31.2	101	15.3	2.88	1	23347432	14948197	79
1	7.25	10	30	6.5	105	83	3.1	142	22.5	7.2	1.1	14	1.7	2.6	15.5	27.6	1.4	1.2719	0.483	14.2163	16.1	0.1	0.7	583	10	79	19	2.3	0.3	26.4	32.2	82	15.5	2.74	1	23348948	16164098	82
7.4	7.29	21	11	7.3	109	48	2.1	137	23.1	7.8	0.8	11	2	3.7	17	42.7	1.6	2.322	1.29	21.414	25.8	0	0	129	145	520	112	2.2	2.6	31.8	33.7	94	19	2.44	1	23352244	10780631	55
4.1	7.34	15	22	6.9	99	142	2.5	136	26.4	8.6	0.6	21	1.9	4.2	23.5	33.9	2.2	0.7665	1.752	18.8997	21.9	0.3	0.7	91	45	79	102	2.4	3.1	30.9	32.6	95	16.1	2.78	1	23357719	12953566	86
4.4	7.23	27	13	8.8	102	128	4.7	136	46	15.7	1.7	33	1.9	5.5	15.2	35.4	1.4	2.32	0.58	8.004	11.6	0	0	73	41	88	65	3.7	2.4	33.6	34.1	99	15	4.67	1	23365835	14787905	64
1.1	7.33	16	23	8.7	111	184	5.3	145	24.8	8	2.7	120	2.8	4.5	13.6	24.6	1.2	0.7125	0.3375	6.42	7.5	0.2	0.2	421	16	97	34	3.2	0.5	32.5	32.2	101	14	2.46	1	23374406	13805740	69
1.4	7.18	16	20	7.7	110	156	8.7	139	32.7	10.4	2.9	46	2.6	6.9	14.2	61.9	1.3	2.376	0.432	17.928	21.6	0	0	234	28	95	107	1.9	0.9	31.6	31.8	99	13.7	3.3	1	23375177	11402910	60
2.6	7.35	24	13	9.2	116	57	6.1	148	31.9	9.8	4.6	105	2.3	4.5	15.1	34.4	1.4	1.729	0.8113	10.6799	13.3	0.2	0.4	318	29	163	56	3.3	0.8	26.1	30.6	85	17.6	3.74	1	23376857	14405974	91
2.5	7.23	26	15	8.1	91	188	11.3	132	30.5	10.5	6.1	110	2.5	4.5	13.6	50.7	1.2	0.6596	0.9603	7.954	9.7	0.1	0	163	48	213	80	3.7	1.2	31.5	34.4	92	15.8	3.33	1	23385507	18362402	68
0.7	7.28	14	19	9.2	108	114	5.3	141	29.6	8.9	2.6	53	2.5	4	15.5	64.7	1.4	2.316	0.772	15.054	19.3	1	1	218	30	104	19	2.7	0.3	28.6	30.1	95	18.3	3.11	1	23395056	10415581	60
2.2	7.45	17	23	9.8	101	123	4.7	141	44.3	14.2	2	64	2.4	5	14.8	23	1.4	0.6004	0.3634	14.615	15.8	0.1	0.1	253	58	101	65	4.4	1.2	30.9	32.1	96	14.6	4.6	1	23395406	14819767	82
2.4	7.33	21	17	7.5	106	77	4.4	140	19.6	6	1	30	1.1	4.1	23.7	29.1	2.2	1.12	0.28	11.48	14	0	0	173	21	177	52	3.4	3	29.1	30.6	95	16.4	2.06	1	23396469	19352458	48
8.4	7.38	32	19	8.9	98	301	4.3	146	42.2	12.7	1.3	22	1.5	3.2	66	38.7	8	0.7854	0.7106	17.1666	18.7	0.1	0	234	18	109	71	3.3	2.5	23.4	30.1	78	18	5.43	1	23411797	18218760	79
0.9	7.38	15	30	9.4	90	144	4.5	130	25.6	8.1	1.1	47	2.1	5	11.7	26.7	1.1	0.97	1.552	14.938	19.4	1	1	380	60	155	38	2.6	0.2	30.1	31.6	95	16.5	2.69	1	23414824	19079053	81
3.6	7.03	13	21	9.6	99	206	1.3	133	40.9	13.6	1	9	1.6	7.8	16	27.5	1.5	0.5	0.3	8	10	0	0	141	133	122	157	4	1.9	28.7	33.3	86	12.1	4.74	1	23416803	14961042	44
2.3	7.42	14	26	5.4	94	95	2.6	131	26.5	9	3.1	30	1.7	3.4	11.5	38.2	1.1	0.318	0.106	4.664	5.3	0	1	42	34	55	195	1.4	5.5	33.6	34	99	14.3	2.68	1	23423185	15096625	58
1.8	7.42	13	28	8.8	102	134	2.7	139	26.1	8.7	1.1	39	2.4	4.4	13.9	68.3	1.3	0.942	0.628	12.403	15.7	0	3	285	8	134	35	2	1.2	32.8	33.2	99	13.7	2.65	1	23431795	17520318	79
1.2	7.27	22	25	8.9	95	170	6.2	137	29.1	8.4	4.7	132	3	4.8	11.1	31.5	1	3.042	1.521	9.971	16.9	0	1	346	11	65	15	2.5	0.4	30.2	28.9	105	15.8	2.78	1	23469254	11941849	85
1.8	7.16	16	19	7.4	107	141	5.4	137	26.1	7.8	1.7	81	2.7	4.6	16.6	39.4	1.5	2.535	0.78	8.58	19.5	0	0	297	28	300	69	2.1	6.8	28.3	29.9	95	19.9	2.76	1	23484409	12848034	62
1.4	7.46	9	27	9.3	115	115	3	147	28.4	9.4	0.7	24	2.4	3.9	18.1	49.6	1.7	3.255	0.744	4.557	9.3	3	0	89	12	69	31	3.3	5.3	31.5	33	96	21.9	2.97	1	23485210	14270705	59
1.6	7.42	16	26	9.2	101	135	4.4	143	24.5	7.4	3	49	2.3	4.2	14.8	32	1.4	0.4356	0.5082	11.0473	12.1	0.2	0	86	20	162	27	2.5	0.7	30.1	30.2	100	20.3	2.46	1	23485217	10584718	77
1.6	7.38	17	20	9	103	142	5.2	140	21	6.8	3.6	64	2.1	4.3	13	23	1.2	1.7875	1.1625	8.75	12.5	0.4	1.3	258	193	187	140	1.9	1.3	31.8	32.4	98	14.2	2.14	1	23487223	17351798	83
2.4	7.34	13	19	6.7	115	57	2.8	143	35.1	11.2	0.7	20	1.7	3.6	17	52.8	1.5	0.615	1.05	13.26	15	0.4	0.1	71	17	107	33	1.4	0.6	27.9	31.9	88	15.7	4.01	1	23490271	17688843	68
4.8	7.42	19	23	8.7	99	153	4.5	141	25.3	8.9	1.3	26	2.4	4.1	12.7	30.1	1.2	1.12	0	0.16	1.6	0	1	28	49	137	132	4.6	1	34	35.2	97	14.8	2.62	1	23493168	11711020	71
0.8	7.49	9	20	5.4	115	118	3.8	141	26.1	8.7	1.9	22	1.5	3.4	12.1	34.4	1.1	0.904	0.791	8.814	11.3	0	4	172	21	47	35	3.5	0.4	31.7	33.2	96	13.4	2.73	1	23513840	18906643	61
8.9	7.42	21	19	8	92	83	3.3	132	31.7	10.6	1.2	11	1.1	3.1	68.8	69.5	6.4	0.255	0.306	3.978	5.1	1	0	36	37	78	154	2.4	14	34.9	33.4	104	16.1	3.04	1	23517987	17597709	32
8.5	7.15	28	16	7.8	99	72	7.8	138	35	11.9	2.1	88	3.3	4.9	20.6	42.5	1.9	2.47	0.76	15.77	19	0	0	100	268	154	892	3.2	19.8	32.5	33.9	96	17.6	3.64	1	23518978	17186197	58
2.9	7.39	20	22	9.2	82	68	7.6	120	28.3	10	2.1	73	2.4	4.1	25.8	42	2.5	0.404	0.202	19.392	20.2	0	0	38	21	36	56	3.9	12.7	36.4	35.5	102	18.8	2.76	1	23530618	14707889	57
1.1	7.04	21	16	7	105	81	5.5	142	31.2	9.4	3.1	44	2	4.9	15.4	27.9	1.4	1.143	0.738	7.011	9	0.3	0.3	195	96	283	216	2.8	1.4	25.2	30.1	84	20.8	3.73	1	23533345	14596582	74
5.2	7.28	13	22	8.1	104	103	3	140	25.9	8.4	1.1	28	1.8	3.9	14.3	29.5	1.3	1.0584	1.2222	10.0548	12.6	0.3	1.3	222	13	59	14	2.2	0.4	30.2	32.4	93	14.8	2.78	1	23541706	13600603	85
3	7.26	23	14	7.8	109	67	5.5	141	45.5	13.8	1.5	27	2.2	4.7	14.9	37.4	1.4	0.864	0.396	5.8824	7.2	0.4	0.4	305	18	373	37	2.6	1.9	31	30.2	103	17.1	4.44	1	23541765	16557426	91
1.1	7.43	13	24	7.7	106	142	3.7	140	27.4	9.1	1	13	1.7	3.4	14.1	27.4	1.3	3.861	7.839	0	11.7	0	0	210	33	74	24	2.3	0.2	31.8	33.2	96	12.8	2.86	1	23541895	17615845	68
2.2	7.41	15	23	8.6	102	68	3.4	140	31.4	9.5	1.2	65	2.5	5.4	18.5	29.1	1.7	0.8613	1.305	6.4467	8.7	0.2	0.3	198	157	128	128	3	0.7	29.5	30.3	98	22	3.22	1	23547619	11223798	59
0.8	7.36	16	20	7.8	110	78	3.2	142	24.4	7.9	1.2	39	2.1	3.9	15	31.5	1.4	0.335	1.608	4.422	6.7	1	1	61	7	69	16	2.2	0.4	30.6	32.4	95	17.6	2.58	1	23559586	10003400	72
1.8	7.46	16	34	9.2	95	111	4.2	145	35	11.3	2.6	61	1.9	3.8	14.2	66.1	1.3	0.19	0.627	8.626	9.5	0.1	0	212	111	69	242	3.1	0.3	31.7	32.3	98	15.4	3.57	1	23567649	16731711	78
4.4	7.33	17	16	8.1	103	72	5.7	136	39.7	13	2.2	42	2.3	5.6	20.9	47.3	1.9	3.0102	4.9478	22.0402	34.6	1.2	9.2	193	373	149	916	2.3	3.4	31.9	32.7	98	16.4	4.07	1	23578459	17680309	75
3.1	7.36	16	21	9	102	63	2.6	135	23.3	8.1	1.6	11	1.7	3.9	16.7	40.3	1.5	0.8019	0.9702	8.0487	9.9	0.1	0.2	93	47	114	73	2.2	0.8	26.8	34.8	77	21.2	3.02	1	23593398	15574754	61
4	7.19	20	22	8.2	102	176	6.4	139	48.9	14.7	2	20	2.2	4.6	11.7	31.7	1.1	0.475	0.125	1.825	2.5	1	0	145	203	61	272	3.1	0.3	28.6	30.1	95	14.4	5.14	1	23600342	19797202	67
1.9	7.41	17	31	8.1	101	233	3.7	149	33.5	10.3	2	57	2.5	4.4	13.6	66.7	1.2	2.163	1.2495	6.825	10.5	0.5	0.9	204	90	93	32	3	0.6	29.3	30.7	95	15.2	3.52	1	23606314	12270760	70
1.6	7.37	16	29	8.7	101	178	4.6	146	32.1	9.5	1.4	76	2.9	3.6	11.1	23.5	1	1.122	0.748	16.456	18.7	0	0	311	17	62	18	3.6	0.3	25.7	29.6	87	17.5	3.7	1	23625111	13946404	91
2.7	7.43	22	19	8.4	96	202	2.1	133	27.6	10	1.4	85	1.6	4.4	22.4	28.1	2	1.0716	1.2267	11.562	14.1	0	0.6	102	113	256	460	2.5	27.9	42.9	36.2	119	19.9	2.33	1	23630881	10645755	50
2.7	7.36	20	20	7	107	150	5.9	141	29.2	9.5	4.3	47	2.3	6.3	16	40.1	1.4	1.17	0.78	29.64	39	0	0	224	331	143	255	2	4.3	30.3	32.6	93	17.7	3.14	1	23632536	10454567	85
3.9	7.45	8	30	8.1	105	89	2.6	143	24.9	8.1	0.7	18	1.9	4	12.3	29.5	1.1	0.288	0.384	3.888	4.8	1	1	157	17	119	22	2.5	0.6	35.1	32.5	108	17.9	2.31	1	23647990	15456642	91
4.3	7.35	12	20	7.2	103	82	2.9	135	27.4	8.4	1.5	19	1.9	4.6	14.1	28.3	1.3	0.438	0.096	0.042	0.6	2	0	119	46	258	125	2.2	2.1	24.7	30.7	81	25.6	3.4	1	23650319	16889487	72
9.8	7.21	27	11	8.7	107	132	6.7	140	29.8	9	2.3	31	2.1	4.5	14.1	29.4	1.2	2.2059	0.2709	10.3716	12.9	0.1	0.2	191	350	114	518	3.4	1	29.4	30.1	98	15.5	3.05	1	23673915	11644495	71
6.7	6.99	21	24	8.6	96	142	10.8	141	45.4	14.6	1.4	12	1.5	4.7	15.2	44.4	1.4	0.672	0.032	2.112	3.2	0	1	67	30	96	121	3.8	8.8	29.9	32.2	93	17.1	4.89	1	23688190	18576582	33
0.5	7.16	13	24	7.8	106	135	3.7	138	33.1	10.7	1.5	27	2	4.8	13.1	25.1	1.1	0.896	0.35	12.614	14	0.3	0.7	378	50	108	36	3.9	0.3	27.1	32	85	13.9	3.96	1	23689523	13719090	69
3.2	7.4	19	23	9.6	112	74	5	150	18.2	6.4	3.6	82	4	4.3	21.1	45.2	1.9	0.8881	0.8383	6.2665	8.3	0.4	3.2	69	54	104	109	3.6	44.3	32.7	34.9	94	26.7	1.94	1	23705986	19368129	54
2.1	7.49	10	34	7.1	89	130	3	130	31.2	10	0.8	22	1.7	3.3	13.9	24.3	1.2	0.544	0.272	5.848	6.8	0	1	114	16	159	31	2.4	0.5	23.7	32.1	74	18.6	4.23	1	23706802	15509548	88
2.6	7.29	27	11	8.2	95	75	8.9	129	24	8.4	5.1	125	2.7	4.1	37.1	60.8	3.5	0.4736	0.518	13.6308	14.8	0.1	1	34	31	61	66	2.7	29.5	33.3	35.1	95	21.1	2.53	1	23713832	16211954	56
1.4	7.49	18	19	7.9	103	115	3	136	35	11.7	1.3	19	1.9	3.7	14.2	27.9	1.3	2.5984	2.5984	14.819	20.3	0.2	0	164	45	66	49	2.9	0.8	26.7	33.4	80	15.2	4.39	1	23724516	13093114	47
2	7.4	13	22	7.5	110	76	2.4	142	36.4	12.1	0.4	12	1.6	3.2	12.7	24	1.1	0.832	0.572	8.8712	10.4	0.1	1.1	297	30	283	65	1.9	0.9	31.9	33.2	96	18.8	3.79	1	23724954	14163633	75
2.4	7.35	9	30	7	108	155	2.2	143	35.6	11.3	0.3	23	2.1	3.6	17.2	49.3	1.5	0.7254	0.4134	6.5988	7.8	0.3	0.6	153	24	130	45	2	0.2	30.6	31.8	96	16.4	3.7	1	23748182	18787376	80
2	7.41	25	16	9.4	97	180	11.2	138	36.4	11.3	6.3	159	3.6	4.1	11.5	30.2	1.1	1.365	2.548	14.0504	18.2	0.1	0.6	334	238	288	414	3.6	0.9	27.8	31	89	14.3	4.07	1	23758547	15335760	33
3.3	7.33	15	20	8.4	103	235	5.2	138	32.7	10.3	2.5	45	2.7	4.7	15.9	48.1	1.5	1.254	1.3035	13.497	16.5	0.1	1.4	259	48	144	87	2.6	0.4	25.8	31.5	82	16	4	1	23766605	19575335	75
2.7	7.48	15	22	11.2	113	115	4.4	146	27.3	8.8	0.9	68	2.2	3.5	18.3	36.5	1.7	3.465	0.315	1.764	6.3	0	3	29	28	300	60	2.8	1.8	28.6	32.2	89	15.1	3.07	1	23772093	12683197	82
2	7.42	12	34	7.7	103	120	3.5	144	33.5	9.3	1.2	68	2.7	4.6	16.2	50.7	1.4	1.7533	0.8077	16.9617	19.7	0.6	0.3	408	34	102	83	2.3	0.6	21	27.9	76	17.2	4.43	1	23776682	16015722	86
2.8	7.46	11	23	10.3	108	148	4.1	142	24.1	7.7	1	18	2.2	4.2	30.6	59.3	2.8	0.61	0.122	10.614	12.2	0	2	17	20	88	35	3.1	25.8	31	32	97	21.3	2.48	1	23794743	12762839	41
3.2	7.43	14	21	7.4	108	168	2.9	139	26.9	8.4	0.9	18	2.2	4.1	19.6	69	1.8	0.364	0.546	16.744	18.2	0	0	92	14	256	34	1.9	0.8	28.8	31.2	92	18.3	2.92	1	23798072	19776118	66
0.6	7.26	8	38	8.9	101	101	2.9	142	30.6	10.3	0.9	23	1.8	4.7	13.7	25.1	1.2	1.1782	0.8428	6.3038	8.6	0.3	2.9	172	16	64	20	2.9	0.2	33	33.6	98	12.2	3.11	1	23799184	14998916	60
4.2	7.42	14	19	6.9	103	73	3.8	136	26.6	9.3	1.2	8	1.6	7.6	18.2	31.8	1.7	0.497	0.355	5.964	7.1	1	1	45	62	126	396	2.2	9.8	36.8	35	105	19.9	2.53	1	23799467	13490707	52
2.7	7.35	20	28	9.8	109	132	4.3	152	33.3	10.1	1.3	78	2.2	4.5	18	46.9	1.7	1.5402	1.2986	27.2404	30.2	0.1	0.3	774	15	103	11	3.4	0.2	23.4	30.3	77	18	4.3	1	23820776	12080206	56
1.8	7.35	14	21	9.8	110	114	4.8	140	22.5	6.8	1.2	39	2	4.6	21.3	63.1	1.9	1.672	1.254	16.72	20.9	1	2	180	12	296	30	2.3	1.6	29.6	30.2	98	17.6	2.3	1	23823649	19497735	64
2.7	7.32	22	14	6.8	112	73	4.6	144	41.9	14.1	2	78	2.2	3.7	13	31.5	1.2	0	0.336	15.792	16.8	0	1	26	75	103	239	2.1	1.7	35.3	33.7	105	15.1	3.99	1	23825247	14344470	70
2.1	7.26	18	15	7.5	111	105	1.7	139	29.5	9.6	3.2	60	1.6	4.5	16.9	32.6	1.5	0.336	1.176	9.744	16.8	0	0	13	102	186	228	2.2	1.7	27.4	32.6	84	21	3.51	1	23826727	19487171	66
1.1	7.37	22	21	7.9	94	145	4.3	133	27.6	9.5	3	63	2.2	4	16.8	56.2	1.5	0.204	0.2448	9.6798	10.2	0	0	74	133	123	63	2.8	1	37.5	34.4	109	15	2.53	1	23831668	10236222	55
7.4	7.32	19	15	7.4	111	116	2.5	142	34.4	10.5	0.7	13	1.5	2.9	18.8	51.8	1.7	1.224	0.153	13.311	15.3	0	0	205	7	82	23	2.3	1.3	28.5	30.5	93	13.3	3.69	1	23832857	19682215	77
1.8	7.4	19	24	14.2	108	127	3.2	148	24.3	8.6	0.7	8	2.6	3.2	16.9	27.5	1.5	0.966	0.644	13.041	16.1	0	1	181	137	65	313	3.3	2.8	31.3	35.4	88	17.2	2.76	1	23833734	12667434	59
1.2	7.35	10	24	7.6	112	133	2	142	25.7	8.6	1	20	1.9	3.8	16.9	29.6	1.5	1.482	0.741	26.22	28.5	0.2	0	401	19	51	26	2.7	0.8	29.5	33.6	88	17.7	2.93	1	23840439	16970086	80
1.2	7.34	13	23	9.3	108	138	1.2	139	22.9	7.7	2	8	2.6	4.5	30.3	63.6	2.9	2.5404	1.4268	13.2762	17.4	0.3	0.6	88	21	73	91	4	28.9	35.7	33.8	106	21.6	2.16	1	23844694	12819839	33
14.2	7.02	37	15	7.1	85	748	10.9	133	34.9	10.9	11.4	110	2	4.2	54.5	46.7	5.2	1.5275	2.535	28.275	32.5	0.4	0.1	353	77	77	108	3.2	0.4	33.2	31.3	106	14.5	3.3	1	23848017	19970470	56
3.4	7.37	16	27	10.1	107	102	2.5	146	22	6.9	2	43	2.5	3.7	44.8	66	4.4	0.5208	0.2478	3.2172	4.2	0.9	4.2	30	20	53	35	5.5	10.6	30.5	31.2	98	18.8	2.26	1	23848340	18253639	55
1.3	7.43	17	15	7	93	112	4.5	120	29.4	10.4	3.4	65	2.3	5.3	22.1	42	2	0.558	2.232	51.894	55.8	0	0	208	186	276	643	1.8	12	34.6	35.4	98	16.8	3.01	1	23868728	16342914	46
1.3	7.43	19	27	8	93	246	4.4	134	30.2	9.6	4.9	40	2	4.5	12.9	25.3	1.2	1.7302	0.492	5.7318	8.2	0.4	2.1	120	18	93	89	4.2	0.6	30	31.8	94	14.6	3.2	1	23874583	12504186	78
2.3	7.5	13	24	10.1	125	139	2.9	157	28.5	9.1	1.9	70	2.7	4.7	15.9	30.1	1.4	1.134	0.2025	11.826	13.5	0.2	2.3	131	89	158	82	2.6	0.4	29.8	32.1	93	13.1	3.07	1	23876365	16386883	84
2.6	7.41	10	24	8.2	103	95	2.7	133	25.2	9.4	0.4	16	1.9	3.6	11.5	27.3	1	0.282	0	0	0.3	0	0	55	17	57	9	2.5	0.4	31.9	37.4	85	13.4	2.95	1	23892923	19135406	71
4.9	7.31	21	21	10.2	97	139	3.7	134	25.6	8.4	1	20	1.8	4.5	34.9	78	3.1	0.2006	0.5236	2.6622	3.4	0	0	57	26	112	49	4.1	11.9	35.4	32.8	108	16.8	2.37	1	23897861	18550032	55
5.9	7.45	10	26	7.7	103	119	1.8	139	21.6	7.1	0.3	20	1.9	3.3	16.2	35.5	1.5	0.572	0.572	10.296	14.3	0	0	48	16	100	27	2.2	2.8	26.8	32.9	82	17.1	2.65	1	23911240	13835044	66
1.8	7.29	17	17	10.9	106	124	6.5	140	29.2	8.9	1.9	56	2.3	5	18.5	78.2	1.7	0.27	0.54	26.19	27	0	0	218	33	211	24	2	0.4	27	30.5	89	17.6	3.3	1	23913187	10082662	67
2	7.37	15	21	7	104	127	4.5	135	32.9	10.7	1.9	43	1.6	4.7	14.7	34.6	1.3	1.248	0.312	13.884	15.6	0	0	94	26	51	32	3	0.6	32.6	32.5	100	14	3.28	1	23917176	13159617	87
1.6	7.36	16	21	9.2	101	138	3.7	133	27.1	8.9	2.6	26	2.6	5	18.7	44.5	1.7	0.508	0.2032	11.811	12.7	1	0.4	120	19	156	77	2.7	12.7	28.1	33	85	19.8	3.18	1	23918193	14930582	31
0.7	7.31	19	23	9.7	87	66	4.9	125	23.8	8.4	3.6	52	2.2	4.4	13.8	36.1	1.3	0	1.098	16.47	18.3	0	4	546	47	520	44	2.7	21.7	31.8	35.1	91	18.6	2.63	1	23920532	11101925	56
2	7.34	13	27	8.5	105	176	4.2	141	31.6	9.9	1	37	2	4.3	14.5	29.5	1.4	1.712	0.963	6.42	10.7	0	0	155	14	122	26	3	0.5	31.1	31.2	100	18.9	3.17	1	23922886	12006266	74
1.4	7.37	12	22	8.1	107	100	1.7	137	28.3	8.9	0.1	7	1.8	3.7	32.3	61.2	2.9	0.204	0.204	8.874	10.2	0	0	241	9	113	14	1.5	0.4	27.9	31.4	89	18.6	3.19	1	23937041	17134675	61
7	7.23	15	25	6.9	99	87	3.6	135	28	8.8	0.7	16	1.4	3.6	29.4	53	2.9	0.588	0.294	2.73	4.2	0	2	154	33	56	119	1.9	10.2	30.4	31.3	97	19.7	2.88	1	23942623	13512758	38
1.7	7.52	14	23	7.7	104	154	1.8	138	32.6	11.3	0.6	11	1.6	3.4	16.9	39.4	1.6	1.253	0.8771	15.5551	17.9	0.4	0.8	253	9	34	14	2	0.2	29.9	34.7	86	15.9	3.78	1	23945163	13789678	87
4.2	7.36	19	14	8.2	105	77	3.4	138	29.2	9.3	1.5	37	1.3	3.7	14.1	36	1.3	0.6	0.6	9.84	12	0	0	27	38	490	71	2	6.7	25.9	31.8	81	19.6	3.59	1	23961320	11023120	69
1.4	7.43	13	20	6.9	104	146	3.8	133	26.9	8.7	1.2	29	2	3.5	14.3	31.9	1.3	1.728	0.528	9.732	12	0.1	0	429	33	109	52	1.3	0.8	28.2	32.2	87	15.3	3.08	1	23963324	16570377	62
1.8	7.48	12	19	8.5	113	107	4.5	140	28.5	9.5	1.9	50	2	4.4	19.3	30.2	1.8	0.54	0.675	11.88	13.5	0	1	388	55	57	56	2	1.8	31.6	33.3	95	16.6	3	1	23971756	13126146	73
2.9	7.39	31	9	8.4	100	136	8.9	135	21.3	6.9	10.2	238	2.3	5.1	18.4	38.8	1.7	0.612	0.238	7.344	8.5	0.5	3.1	126	27	64	55	3.9	1.8	31.5	32.5	97	23.8	2.2	1	23987440	16046203	43
1.2	7.36	12	27	8.3	104	151	3.5	139	24.6	7.4	0.9	36	1.9	4	11.5	98.6	1.1	14.608	0	0.332	16.6	0	4	132	37	46	28	1.7	0.9	32.3	30.2	107	19.7	2.29	1	23993014	19789144	77
3	7.45	20	18	7.8	104	75	4.2	142	20.7	7.1	2.7	66	1.9	3.9	20.5	34.8	1.9	0.7097	0.7191	2.8294	4.7	0.4	8	159	185	242	220	2.7	13.9	30.5	34.3	89	21.7	2.33	1	24007687	16055700	36
4.1	7.37	20	19	7.4	98	240	3.7	133	24.7	7.8	1	34	2.2	4	55.7	44.6	5.3	0.804	1.072	10.72	13.4	0	0	228	133	343	466	2.6	8.3	32.9	31.7	104	19.5	2.38	1	24011313	12375249	79
2.6	7.13	17	22	6.1	111	105	4	147	37.2	12.1	0.7	14	1.4	3.2	19	40.1	1.7	0.58	0.29	2.32	5.8	0	0	227	856	343	97	2.4	0.8	29.4	32.5	91	15.2	4.11	1	24015597	14058744	61
0.7	7.48	11	40	8.7	90	112	3.2	137	30.5	9.3	0.7	52	2.5	3.7	11.3	34.6	1	0.656	0.656	13.284	16.4	0	0	181	451	54	117	3.3	1.9	26.9	30.5	88	17.3	3.46	1	24016655	19721801	75
4	7.48	14	25	11.4	112	138	2	151	25	7.6	1.2	22	2	3.6	13.6	42	1.3	0.6525	1.215	20.3625	22.5	0.2	0	332	17	165	25	1.8	0.4	27.6	30.4	91	15.9	2.75	1	24020258	17323588	54
2.2	7.34	13	21	7.6	112	67	3.4	142	27.2	8.7	1.9	41	1.7	3.6	16.7	49.1	1.5	0.9635	0.451	19.0855	20.5	0	0	28	58	210	48	2.5	1.8	34.6	32.1	108	20.1	2.52	1	24022078	13166936	76
1.7	7.3	12	21	6.8	112	117	4.3	141	33.3	11.5	0.9	35	1.5	4.2	16.2	41.3	1.4	0.7608	0.3804	30.4954	31.7	0.2	0	114	52	810	53	1.9	2.1	34.9	34.4	101	17.3	3.28	1	24034738	13100985	63
5	7.12	23	11	8	107	335	5.9	137	27.6	8.6	3.1	81	1.7	4.1	13.8	38.9	1.3	0.97	0.776	16.296	19.4	0	1	24	18	146	49	2.2	0.9	30.6	31.2	98	14.7	2.81	1	24052374	19149321	53
2.2	7.4	17	19	7	104	133	3.4	136	31.8	9.6	1.1	19	1.9	3.9	12.1	43.2	1.1	0.227	1.589	17.706	22.7	0	0	519	8	89	20	2.7	1.5	30.2	30.2	100	16.8	3.17	1	24056802	19327083	68
1.2	7.38	14	23	8.3	106	127	3.9	139	33.3	10.1	0.8	40	2.2	4.4	34.5	34.7	3.1	1.1349	0.702	8.6463	11.7	0.3	8.3	191	6	159	63	3.3	1.3	28.1	30.3	93	14.7	3.6	1	24067321	14682921	78
2.5	7.37	12	16	7.8	122	138	3.5	146	25.5	8.4	1.6	46	1.9	3.6	39	74.6	3.7	0.116	0	11.252	11.6	0	0	39	15	75	27	2.3	5.2	31.4	33	95	20.4	2.68	1	24090225	10384160	71
3	7.41	18	24	8.4	98	442	3	140	38.7	12.3	0.9	20	1.8	3.9	12.9	28.3	1.2	0.2496	0.5772	14.6328	15.6	0.1	0	211	513	207	651	3	0.7	31.4	31.8	99	13.7	3.92	1	24106018	12582583	72
3.5	7.45	9	26	7.3	107	153	2.9	138	31	10.2	0.9	29	2.3	4.3	22	39.6	2.1	0.522	0.06	0	0.6	0	3	13	25	82	39	1.7	4.9	32.4	32.9	98	14.4	3.16	1	24106942	10150812	59
1.2	7.47	17	28	10.1	105	124	3.9	146	31.5	9.8	1	37	1.9	4.3	10.1	48.1	0.9	0.3944	0.8432	12.2128	13.6	0.1	0	172	84	66	454	1.7	0.3	29.5	31.1	95	13.9	3.32	1	24113307	10150335	72
1.7	7.37	12	22	8.7	117	212	4.5	146	28.5	8.7	2	68	2.7	5.1	12.9	29.7	1.1	0.2124	0.1416	5.4516	5.9	0.1	1.6	198	25	90	39	3.1	0.3	30.7	30.5	101	19.2	2.83	1	24119285	15946581	59
1.4	7.27	19	18	8	103	219	3.7	140	23.7	7.8	3.4	81	2.5	4.7	13.9	31.3	1.3	0.932	0.932	20.504	23.3	0	0	29	189	340	90	2.5	4.9	31.3	32.9	95	21.1	2.49	1	24126677	10472107	62
3.8	7.23	20	19	7.7	113	299	7	147	18.9	5.6	1.9	84	2.6	4.8	29.9	32.8	2.7	0.507	0.169	15.379	16.9	0	0	184	49	146	103	2.1	0.3	30.1	29.6	102	16.7	1.86	1	24135107	13485392	75
3.5	7.51	11	26	8.1	87	128	2.5	120	26.2	9.4	0.8	26	1.3	3.7	41	68.2	4.3	0.27	0	0.03	0.3	0	0	296	21	130	33	2.8	1.1	33.2	35.7	93	14.2	2.82	1	24139954	14724831	76
1.5	7.4	23	26	10.1	95	191	3.8	140	30.6	9.3	1.7	52	2	3.6	15.7	25.4	1.5	2.1012	1.1424	17.0136	20.4	0.1	0.7	227	36	296	58	5.3	1.2	28.1	30.4	92	16.4	3.31	1	24152692	13976005	59
1.7	7.33	17	20	7.8	103	117	5.2	136	26.8	8.4	4.6	64	2.1	4.4	16.3	27.6	1.5	2.8116	1.2474	14.4342	19.8	0.4	6.2	165	47	72	88	3.3	4.3	34.4	31.5	109	14.8	2.45	1	24160706	10824441	58
4.4	7.48	19	25	9.3	98	50	3.5	142	32.7	11.1	4.8	20	1.6	3.3	17.2	38.5	1.6	1.521	0.702	7.722	11.7	0	2	132	683	105	87	3.1	14.8	27.8	33.9	82	14.7	4	1	24174303	12748404	40
11.8	7.16	33	10	8.8	100	44	6.4	138	45.6	15.3	3.9	37	2.2	5.3	38.7	43.5	3.9	3.16	0.316	3.792	15.8	5	48	135	183	78	127	3.1	0.6	34.5	33.6	103	16	4.45	1	24186586	15539588	52
4	7.36	21	27	8.2	94	86	2.6	138	36.5	10.9	1.9	19	1.6	3.8	11.5	29	1.1	0.276	0.552	5.037	6.9	0	0	114	54	176	106	3.6	0.8	31.5	29.9	106	18.1	3.46	1	24193153	16425465	71
1.2	7.2	19	16	7.6	118	91	4.9	149	34.3	9.9	1.7	81	1.7	3.8	14.1	45.3	1.3	0.644	0.805	14.651	16.1	0	0	76	31	224	42	3.6	0.8	25.9	28.9	90	18.4	3.82	1	24198344	15406688	85
1.6	7.47	13	28	9	99	161	2.1	136	28.7	9.8	2.2	16	2.3	3.9	12	30.2	1	0.372	0.558	6.51	9.3	1	1	106	99	194	254	2.7	1	29.2	34.3	85	15.3	3.37	1	24201752	14807751	61
2.2	7.47	12	21	7.8	109	108	1.8	142	34.2	11.1	0.6	30	1.9	3.5	15.1	36.6	1.4	1.026	0.648	9.0288	10.8	0.1	0.1	182	23	73	43	1.9	0.4	30.5	32.5	94	14.9	3.64	1	24204496	16554461	86
1.7	7.17	17	18	7.4	105	181	3.3	136	28.7	9	1.3	21	1.3	3.9	11.1	27.5	1	1.0443	0.708	15.6291	17.7	0.2	1.6	177	19	48	19	2.9	0.4	29.3	31.4	93	17.6	3.07	1	24214642	17311346	73
2	7.23	16	20	7.6	100	88	3.3	136	30.7	10	0.6	12	2	4.2	13.6	74.6	1.3	0.3	0	0.93	1.5	0	1	96	34	85	16	2.5	0.3	31.1	32.6	95	15.1	3.22	1	24218277	14239129	60
3.3	7.36	16	14	7.7	111	152	2.2	138	29	8.7	1.3	30	2.4	3.4	14.1	40.1	1.2	0.303	0.303	29.694	30.3	0	0	234	9	369	12	2.8	0.9	28.8	29.9	96	17.2	3	1	24222954	15604856	57
2.6	7.39	22	24	8.7	102	111	3.8	143	39.1	12.6	1.3	24	2.1	4.6	67.4	51.8	6.2	0.87	0.435	7.395	8.7	0	0	340	27	128	53	3.5	0.7	34.8	32.1	109	14.2	3.61	1	24229303	10483660	67
1.6	7.47	17	20	8.6	115	142	2.8	147	31.6	10.5	0.9	23	1.9	4.7	13.9	38.5	1.3	3.1842	1.4274	13.5786	18.3	0.3	0.3	181	74	108	85	3.1	1.6	29.5	33.1	89	18.6	3.56	1	24239864	13859181	61
3.4	7.52	28	22	8.1	97	103	3.8	143	33.6	11.2	4	39	1.6	3.5	18.2	33.7	1.7	1.458	0.729	18.711	24.3	0	0	205	29	66	43	2.4	0.5	35.4	33.4	106	14.9	3.18	1	24241632	15639305	80
6.2	7.42	25	18	7.7	94	27	6.9	131	31.2	10.3	5	69	1.9	6.2	28.7	50.1	2.8	0.63	0.45	6.39	9	0	3	26	63	42	118	2.2	5.7	33.6	33.1	102	16.8	3.08	1	24245314	15532290	43
2.3	7.42	9	31	7.3	92	102	3.8	128	20	7	1.6	48	1.9	3.6	19.3	48.7	1.8	2.323	0.505	4.646	10.1	0	10	168	15	67	20	2.6	7.2	30.2	35	86	19.4	2.32	1	24249600	14677959	54
1.8	7.22	15	29	7.6	100	90	5.3	139	46.9	13.5	1.4	68	2.4	4.7	21.3	39	1.9	0.4059	0.7326	8.7219	9.9	0.2	0	82	724	103	588	2.9	2.2	29.2	28.8	102	15.5	4.62	1	24255453	13237459	74
1.9	7.25	8	27	9	104	91	5.4	139	24.5	8	1.8	29	2.1	3.6	35.8	69.6	3.3	0.7785	0.567	2.826	4.5	0.7	6.2	47	37	96	148	3.4	9.3	34.3	32.7	105	18.9	2.33	1	24257875	16184501	51
2.2	7.28	18	21	8	104	114	8.7	138	25.9	8.6	3.7	134	2.6	4.7	14.1	29.2	1.2	0	0.075	7.2	7.5	0	0	14	52	376	107	2.3	4.4	35.7	33.2	108	23.6	2.4	1	24259631	16995250	56
1.9	7.25	22	20	9.4	97	139	4.4	134	41	12.4	5	92	2.4	5.1	15.2	25.1	1.3	1.84	4.416	23.552	36.8	0	0	702	19	73	29	2.5	0.2	29.1	30.2	96	13.7	4.27	1	24261893	18770565	69
2.9	7.39	22	18	6.6	99	337	2.2	135	36.5	12.4	2.6	60	1	3.8	13	31.1	1.1	0.208	0.156	3.848	5.2	0	2	100	42	84	56	2.2	1	30.7	33.9	91	13.6	4.03	1	24262940	18690426	66
1.1	7.15	18	17	7.5	106	46	5.1	138	26.8	8.4	2	50	1.8	3.3	15.7	30.5	1.5	0.03	0.015	0.415	0.5	0	0	6	39	217	55	1.5	1.4	34.5	31.3	111	19.1	2.42	1	24277049	18539425	48
1.4	7.36	14	28	8.4	107	80	3.1	145	30.2	9.8	2.7	78	2.2	3.6	22.9	36.1	2.2	1.0608	0.4056	8.0808	10.4	0.3	8	103	16	76	26	3.3	0.9	30.5	32.4	94	17.3	3.21	1	24289215	19818283	86
2.4	7.58	17	21	9.1	105	236	4.6	143	35.4	12.1	3.4	78	2.9	4.5	15.3	23.1	1.4	2.065	1.4175	13.8425	17.5	0.1	0.1	199	20	57	10	3.4	0.9	33	34.2	97	14.1	3.67	1	24300186	15624993	88
2.6	7.44	17	22	7.4	99	126	4.5	133	22.9	7.1	3.7	98	1.9	4.7	12.9	37.8	1.2	1.54	0.96	17	20	0.4	2.2	124	29	103	23	3	0.2	28.1	30.8	91	17.1	2.52	1	24308390	16022077	91
1.5	7.19	15	17	8.8	106	141	5.4	132	28.5	8.5	4	130	2.5	5.7	12.9	29.4	1.2	1.0972	0.9284	40.0478	42.2	0.1	0.2	153	22	159	31	2.9	0.3	28.4	30	95	15	3.01	1	24312163	10931669	85
3.4	7.28	15	16	7.8	118	110	3.9	146	28	9	1.5	11	2.1	3.2	15.5	55	1.4	0.9888	0.3264	8.1408	9.6	0.2	1.3	102	24	199	39	1.8	0.8	34	31.9	106	21.9	2.64	1	24314052	10701573	61
1.4	7.29	8	28	7.5	105	143	3.3	137	28.3	9.1	0.4	10	2.1	3.6	13.4	37.7	1.1	0.396	0.3168	9.1575	9.9	0.2	0	220	18	106	20	1.9	0.9	29.3	32	91	17	3.1	1	24320933	19653844	62
[truncated: 3,611 more rows]
