# Supplementary material for: Explainable AI-driven heterogeneity using coagulation–inflammatory markers improves prognosis prediction, risk stratification, and anticoagulant treatment effects for sepsis
Source: Research Square preprint supplement (doi:10.21203/rs.3.rs-5835917/v1), 2025-02-27
Supplement: Supplementary file 2 [file 61a622424a2780ed430f607e.xlsx]

## Sheet: Local ICU
aPTT	INR(PT)	Lymphocytes	Monocytes	Neutrophil	White_Blood_Cells	Platelet_Count	age	dead
29.2	0.9	0.5	0.7	13.42	14.63	2.29226	45	0
38.3	0.93	0.32	0.15	2.58	3.06	2.14301	43	1
24.9	0.94	0.02	0.16	5.06	5.28	2.11727	76	1
35.5	0.96	0.15	0.4	6.34	6.9	2.20683	69	0
39.8	0.96	0.44	0.32	9.17	9.93	2.2014	83	1
43.2	0.97	0.72	0.81	1.96	3.76	2.08279	73	0
22.6	0.99	0.21	1.21	11.49	12.97	2.15229	66	0
37.9	0.99	0.53	0.53	11.35	12.43	1.9345	52	0
25.8	1	0.28	0.34	13.59	14.23	2.4133	62	0
38.7	1	0.49	0.66	12.72	14.07	2.32222	53	0
33.8	1.01	0.73	0.64	11.95	13.34	2.19033	56	0
30.3	1.02	0.47	1.05	8.52	10.06	2	61	0
23.3	1.03	0.2	0.51	9.07	9.8	2.4843	82	1
35	1.04	0.38	0.53	5.96	6.89	2.05308	24	0
30.9	1.04	0.4	0.27	13.81	14.74	1.62325	61	0
31.9	1.04	0.29	0.71	18.28	19.32	2.53908	77	0
50.1	1.04	0.37	0.39	3.87	4.64	1.68124	67	1
29.8	1.04	0.39	0.02	10.41	10.86	2.47857	41	0
38.5	1.05	0.68	0.42	6.69	7.8	2.06819	64	1
50.4	1.05	0.37	0.27	4.08	4.76	2.50515	88	0
52.3	1.05	0.6	0.08	5.91	6.62	2.03743	63	1
40.1	1.06	0.25	0.4	16.86	17.53	2.48855	76	0
57.6	1.06	0.3	0.09	4.25	4.64	2.03743	46	1
31.1	1.06	0.77	0.87	7.18	8.86	2.29667	67	0
35.1	1.06	0.71	0.31	7.62	8.66	2.32222	74	0
31.5	1.06	0.4	0.38	10.51	11.3	1.96379	74	0
46.8	1.07	0.44	0.3	2.65	3.45	1.66276	68	0
51.5	1.07	0.4	0.47	10.03	10.9	2.01703	71	0
33.7	1.08	0.41	0.78	6.16	8.37	2.32634	88	0
45.7	1.08	0.74	0.31	23.6	25.49	2.55871	56	0
37.2	1.08	0.48	0.46	8.69	9.64	2.10037	78	0
27.8	1.08	0.32	0.33	6.12	6.85	2.41162	70	0
30.6	1.08	0.51	0.11	8.92	9.54	2.26951	36	0
42.7	1.08	0.5	0.05	3.99	4.6	2.20952	80	0
41.1	1.09	0.52	0.01	1.38	2.02	1.62325	54	0
66.7	1.09	0.57	1.63	35.68	37.92	1.36173	74	0
41.8	1.09	0.39	0.98	13.67	15.05	2.21484	73	0
37.7	1.09	0.25	0.21	7.1	7.56	2.13354	87	0
42.3	1.09	0.62	0.79	11.3	12.73	2.20952	70	0
45.4	1.09	0.37	0.42	9.97	11.02	2.65418	60	1
27.4	1.09	0.67	0.72	12.25	13.66	2.59106	65	0
24.9	1.09	0.99	0.99	12	14	2.46687	69	0
35.2	1.1	1.81	1.47	25.31	28.76	1.04139	46	0
33.3	1.1	0.11	0.31	9.79	10.26	2.07555	55	0
46.3	1.1	0.29	0.4	3.4	4.09	2.34439	60	0
30.7	1.1	0.49	0.68	18.26	19.49	1.49136	83	1
53.8	1.1	0.21	0.33	29.14	29.8	2.13988	76	0
37.2	1.1	0.37	0.18	3.91	4.51	2.01284	52	0
40.5	1.11	1.39	0.74	21	23.15	2.30963	48	0
26.9	1.11	0.18	0.42	6.01	6.64	2.24551	74	0
37.7	1.12	0.51	0.6	5.59	8.84	2.31597	48	1
38.2	1.12	0.55	0.55	6.81	7.98	1.82607	33	0
29	1.12	0.81	0.69	20.86	22.36	2.62325	78	0
50.1	1.12	0.31	0.03	5.85	6.19	1.96848	79	0
26.8	1.12	0.75	0.31	6.18	7.31	2.37291	77	0
33.3	1.12	0.72	0.84	8.15	9.73	1.96379	75	0
28.4	1.12	0.58	0.44	19.36	20.42	2.49136	44	1
50.2	1.12	0.83	0.36	7.38	8.58	1.95424	46	0
29.4	1.12	0.73	0.3	3.19	4.63	1.57978	64	0
23.6	1.12	0.42	0.52	11.42	12.37	2.33445	89	0
24.5	1.12	0.64	1.37	22.46	23.77	2.34242	93	0
38.6	1.13	0.97	0.73	12.79	14.52	1.99564	76	0
31.1	1.13	0.18	0.07	3.04	3.3	1.74819	67	0
46.8	1.13	0.54	0.61	8.18	9.53	2.25285	48	0
38.2	1.13	0.63	0.4	7.03	8.11	2.25527	61	0
31	1.13	0.49	0.44	6.83	7.78	2.19866	78	0
31.7	1.13	0.31	0.16	21.64	22.15	2.52375	81	0
27.1	1.13	0.3	1.23	14.06	15.61	2.53656	80	1
28.2	1.13	0.37	0.8	5.21	6.39	2.35603	62	0
36.6	1.14	0.64	0.3	9.37	10.32	2.17898	69	0
63.5	1.14	1.51	0.74	3.33	5.85	1.68124	28	0
33.5	1.14	0.77	0.49	20.2	21.52	2.41664	72	0
42.9	1.14	1.49	0.29	2.06	4.01	1.99123	50	0
34.1	1.15	0.54	0.55	4.69	6.07	2.43775	85	0
34	1.16	0.64	0.12	1.3	2.1	0.954243	64	0
38	1.16	0.75	0.92	10.39	12.64	2.13672	56	0
37.9	1.16	0.56	0.55	15.97	17.1	2.32015	50	0
48.1	1.16	0.44	0.4	13.28	14.16	2.20683	86	0
40.7	1.16	0.41	0.32	5.53	6.28	1.69897	77	0
32.8	1.16	0.8	0.81	8.09	9.7	1.716	75	0
37.2	1.16	0.44	0.48	10.38	11.31	2.29447	62	0
53.4	1.17	0.61	0.22	6.29	7.12	1.76343	47	0
37	1.17	0.42	0.78	8.51	9.71	1.98227	66	0
35.7	1.17	0.58	0.87	24.79	26.32	2.734	68	1
31	1.17	0.2	0.34	10.01	10.55	2.54654	55	0
29	1.18	0.51	0.28	9.29	10.29	2.52504	66	1
42.8	1.18	0.66	0.23	3.58	4.48	2.3784	42	0
186.9	1.18	0.15	0.05	3.02	3.48	1.6902	58	0
31.4	1.18	0.82	0.6	4.35	6.03	2.40483	66	0
35	1.18	0.28	0.28	19.62	20.21	2.45637	65	0
28.4	1.18	0.39	0.25	7.4	8.05	2.40993	79	0
41.1	1.19	0.22	0.3	4.31	4.84	2.42325	68	0
54.7	1.19	0.25	0.16	8.24	8.66	2.45025	63	0
33	1.2	0.61	1.22	15.05	16.91	2.13033	86	0
31.5	1.2	0.6	0.18	9.59	10.38	2.29003	75	0
41.2	1.2	0.38	0.52	15.75	16.7	2.24797	84	0
32.9	1.2	0.5	0.57	8.07	9.15	2.26245	73	0
30.3	1.21	0.69	0.72	6.09	7.66	2.06819	86	0
68.5	1.21	0.35	0.92	16.1	17.42	1.69897	65	0
36.5	1.22	0.92	0.55	10.62	12.12	2.38021	78	0
51.3	1.22	0.1	0.01	2.92	3.04	1.47712	75	0
48.3	1.22	0.68	0.51	12.13	13.31	2.07918	54	0
38.3	1.22	0.33	0.83	9.82	11.02	2.14922	68	0
31.2	1.22	0.69	0.44	10.33	11.47	1.88081	94	0
69.3	1.22	1.46	0.52	5.3	7.43	2.67761	73	0
38.1	1.22	0.4	0.51	5.18	6.32	2.32838	72	0
42.2	1.23	0.4	0.71	14.35	15.51	2.19866	71	0
93.1	1.23	0.24	0.11	2.41	2.8	2.13354	84	0
40.8	1.23	0.9	0.69	18.03	19.64	2.4014	50	0
52.3	1.23	0.4	0.43	9.11	9.94	1.98677	53	1
34.3	1.23	0.6	0.56	12.12	13.3	2.64048	83	1
55	1.23	0.22	0.18	4.99	5.42	2.14301	53	0
36	1.23	0.34	0.67	12.42	13.44	2.1271	91	0
32.4	1.23	0.12	0.21	3.59	3.94	1.49136	62	0
30.2	1.23	0.61	0.57	30.68	31.93	2.49693	66	0
36.4	1.23	0.58	0.74	7.28	8.81	2.38739	49	0
40.5	1.23	0.53	0.34	6.63	7.51	1.94448	65	1
27.5	1.23	0.39	0.83	11.06	12.32	2.43457	72	0
33.7	1.23	0.73	0.69	7.42	8.87	2.42813	76	1
34.8	1.24	0.38	0.87	27.72	28.88	2.15229	68	0
45.7	1.24	2.05	1.91	11.61	15.63	2.43297	20	0
39.1	1.24	0.56	0.15	20.99	21.14	2.5977	52	0
38.3	1.24	0.22	0.08	1.4	1.72	2.06446	60	0
31.8	1.24	0.71	0.57	8.61	9.97	1.98227	72	0
35.3	1.24	0.32	0.19	1.59	2.1	2.0569	68	0
32.8	1.24	0.64	0.4	8.08	9.13	2.22531	69	0
46.8	1.24	0.43	0.43	16.28	17.16	2.49831	71	0
41.1	1.24	0.63	0.13	7.5	8.26	1.86923	79	0
39.3	1.24	0.78	1.11	8.96	10.86	2.28556	73	1
37.1	1.24	0.43	0.82	19.04	20.41	2.02119	74	0
34.8	1.24	0.7	0.42	17.32	18.47	2.38021	76	0
28.6	1.24	0.58	0.55	14.12	15.27	2.08279	73	0
28.3	1.24	0.66	0.58	9.49	10.74	2.11727	65	0
25.2	1.24	1	0.64	7.8	9.52	2.70415	54	0
47	1.25	1.04	1.5	23.75	26.75	2.64738	49	0
35.4	1.25	0.54	0.73	6.91	8.2	2.10721	63	0
38.5	1.25	0.62	0.35	5.93	7.02	2.17026	50	0
40.9	1.25	0.82	0.65	9.7	11.2	2.24055	72	0
39.8	1.25	0.37	0.42	11.22	12.01	2.03743	75	0
24.8	1.25	0.34	0.65	11.55	12.55	2.11394	66	0
45	1.25	1.32	0.61	8.05	10.05	2.21219	76	0
53.6	1.25	0.37	0.54	8.35	9.26	1.87506	52	0
38	1.25	0.17	0.05	4.81	5.05	2.02119	57	0
38	1.25	0.17	0.05	4.81	5.05	2.02119	57	0
31.4	1.25	0.67	0.03	7.28	8	2.0607	66	0
28.1	1.25	0.47	1.32	33.96	35.78	2.2014	49	0
50.1	1.25	0.44	0.24	6.41	6.94	2.19866	59	0
49.3	1.26	0.73	1.25	34.61	36.7	2.05308	85	0
45.4	1.26	1.18	0.63	12.87	14.72	2.36549	60	1
32.5	1.26	0.69	0.1	1.2	1.99	2.14613	85	0
47	1.26	0.54	0.11	7.86	8.58	1.36173	51	0
52.3	1.26	1.3	0.42	12.54	14.32	2.06819	54	0
36.4	1.26	1.02	1.53	11.34	13.93	2.07188	70	0
38.3	1.26	0.65	0.02	15.05	15.74	2.07555	62	1
34.5	1.26	0.32	0.04	2.79	3.24	1.64345	45	1
47.3	1.26	0.42	0.37	3.79	4.64	2.38739	68	0
31.2	1.26	0.48	0.18	2.68	3.35	2.21748	82	0
32.7	1.26	0.5	0.47	8.5	9.52	2.49415	79	0
38.7	1.26	0.88	0.38	8.98	10.29	1.82607	74	0
33.5	1.26	0.61	0.56	4.53	5.86	2.3032	61	0
56.3	1.26	0.47	0.19	8.16	9.49	1.65321	55	1
48.3	1.26	0.13	0.68	13.26	14.08	2.24304	84	1
39.3	1.26	0.65	0.28	11.57	12.53	2.24797	59	1
52.8	1.26	0.53	0.07	6.1	6.7	2.33244	55	0
40.3	1.26	0.83	0.59	11.17	12.61	1.85733	56	0
37.5	1.27	0.51	0.22	11.38	12.11	2.15836	74	0
39.6	1.27	0.53	0.46	15.51	16.53	2.15534	72	0
45.3	1.27	0.8	1.03	17.51	19.46	2.50515	41	1
37.1	1.27	1.39	1.99	56.92	60.3	1.17609	60	0
61.1	1.27	0.61	0.47	10.45	11.53	1.94448	46	0
27.9	1.27	0.38	0.33	2.04	2.78	2.0086	58	0
34.7	1.27	0.42	0.59	19.21	20.22	2.27184	43	0
44.4	1.27	0.77	0.39	8	9.02	2.27646	55	1
33.2	1.27	0.59	0.77	9.62	10.99	2.34439	90	1
40.8	1.27	0.27	0.22	1.83	2.33	2.11394	76	0
41.6	1.27	0.5	0.13	8.82	9.46	1.36173	77	0
42.2	1.28	0.12	0.11	2.64	2.88	2.06819	66	1
42.5	1.28	0.2	0.08	6.42	6.72	2.17609	61	1
46.1	1.28	1.1	0.74	11.3	13.37	2.52114	57	0
45.6	1.28	0.45	0.19	11.42	12.17	1.89763	72	0
47.5	1.28	0.7	0.94	8.72	10.39	2.24055	54	0
25.9	1.28	0.66	0.58	4.65	5.9	2.19033	76	0
45.9	1.28	0.73	0.86	17.03	18.65	2.32838	71	0
33.7	1.29	0.65	0.76	13.43	14.86	2.22272	58	0
67	1.29	0.64	0.87	14.51	16.03	2.31175	33	0
41.5	1.29	0.46	0.04	1.31	1.82	1.65321	52	1
42.5	1.29	0.42	0.27	12.1	12.8	2.06819	29	0
40.3	1.29	0.92	0.72	6.56	8.25	2.57403	40	0
41.7	1.29	0.19	0.11	3.83	4.13	2.16137	87	0
38.7	1.29	0.3	0.52	2.76	3.66	2.1959	44	0
55.7	1.29	0.15	0.94	71.53	72.62	2.43933	68	0
35.2	1.29	0.54	0.09	12.27	13.62	2.3927	53	0
35	1.29	0.78	0.41	6.59	7.83	1.11394	64	0
31.7	1.29	0.79	0.5	18.85	20.16	2.46835	85	0
38.7	1.29	0.21	0.19	6.49	6.94	2.16435	81	1
31.3	1.29	0.55	0.57	5.09	6.23	2.31806	69	0
39.7	1.3	0.47	0.54	15.74	16.31	2.04922	98	0
52.5	1.3	0.6	0.65	8.99	10.29	2.23045	50	0
43.1	1.3	0.56	0.17	4.96	5.69	2.51851	79	1
36.8	1.3	0.92	0.61	9.32	10.8	2.08279	75	1
49.4	1.3	0.38	0.11	1.73	2.22	2.12057	41	0
43.9	1.3	0.79	0.67	13.77	15.25	2.60959	51	0
43.2	1.3	0.38	0.63	5.57	6.77	2.2878	85	0
61.1	1.3	0.13	0.26	4.63	5.05	2.04139	80	1
40.4	1.3	0.87	0.36	5.85	7.08	2.24304	72	0
45.6	1.3	0.48	0.12	8.76	9.39	1.92428	79	1
36.5	1.3	0.22	0.06	2.92	3.24	2.36922	57	0
29.1	1.3	0.73	0.66	15.46	16.88	2.32634	73	0
52.7	1.31	0.34	0.18	4.58	5.25	1.77815	30	0
45	1.31	0.72	0.69	14.05	15.59	1.49136	31	0
49.4	1.31	0.21	0.24	14.56	15.03	1.91381	61	0
38.4	1.31	0.44	0.66	15.88	17.04	2.02119	77	1
32.8	1.31	0.65	0.47	12.77	13.93	2.18469	20	0
40.1	1.31	0.34	0.16	4.76	5.26	2.18469	69	0
26.2	1.31	0.72	0.41	14.75	15.91	2.12385	77	0
31.6	1.31	0.57	0.96	11.76	13.3	2.26717	53	0
45.3	1.31	0.25	0.72	10.02	11.08	1.85126	50	1
33	1.31	0.25	0.05	7.43	7.73	2.48572	48	1
47.2	1.31	0.43	0.6	17.59	18.73	2.13354	92	1
48.7	1.32	0.48	0.51	24.25	25.29	2.34044	53	0
36.5	1.32	0.61	0.36	7.19	8.17	2.2014	67	0
44	1.32	0.38	0.41	3.23	4.05	2.50379	76	1
46.8	1.32	0.95	1.66	26.87	29.69	1.85126	80	0
54.9	1.32	0.34	0.16	10.06	10.58	2.07555	57	0
42.7	1.32	0.42	0.4	9.54	10.38	2.20952	72	0
35.3	1.32	0.45	1.4	10.57	11.15	1.89763	77	0
33.2	1.32	0.18	0.17	2.69	3.05	2.45939	67	0
34.3	1.32	0.97	0.8	26.49	27.62	2.51587	74	0
41.6	1.32	0.31	0.81	10.38	11.51	2.33041	89	0
60.9	1.32	0.74	1.03	8.48	10.28	1.86923	79	0
33.2	1.32	0.68	0.7	10.91	12.3	2.17898	87	0
47.3	1.32	0.85	0.22	21.15	22.38	2.74663	70	0
45.4	1.32	0.24	0.07	1.99	2.34	2.0569	72	0
34	1.33	0.68	1.14	15.9	17.77	2.38739	47	0
36	1.33	1.22	1.42	13.15	15.81	2.29003	70	0
79.2	1.33	1.12	1.64	28.11	31.03	2.74351	53	1
71.5	1.33	0.25	0.24	6.04	6.64	1.81291	60	0
39.1	1.33	0.51	0.83	19.87	21.3	1.75587	55	1
63	1.33	0.64	0.33	5.29	6.28	2.26951	79	0
45.3	1.33	0.05	0.19	23.04	23.3	2.13988	86	1
29.2	1.33	0.98	1.24	29.18	31.96	2.75967	50	0
46	1.34	0.3	0.46	13.69	14.47	1.9345	85	0
38.2	1.34	1.85	16.7	11.89	15.3	2.16435	44	1
46.1	1.34	0.64	0.27	6.59	7.65	2.31597	61	1
49.7	1.34	0.63	0.16	15.34	16.23	1.87506	80	0
42	1.35	0.94	0.97	24.3	26.24	1.32222	39	0
41	1.35	0.56	0.42	6.23	7.22	2.3032	82	1
49	1.35	0.29	0.41	28.5	29.23	2.36922	66	0
40.1	1.35	0.81	0.75	15.56	17.14	2.54283	65	0
25.5	1.35	0.53	0.42	7.56	8.52	2.34635	65	0
57.5	1.36	0.28	0.62	9.31	10.21	1.39794	53	1
40.4	1.36	0.38	0.2	3.07	3.66	2.1038	65	1
46.6	1.36	0.26	0.48	12.17	12.99	2.40312	76	0
39.4	1.36	0.62	0.92	11.58	13.15	2.0086	90	0
43.2	1.36	0.64	0.19	6.34	7.17	1.716	41	0
142.5	1.37	0.44	0.28	12.47	13.22	2.21748	79	0
39.4	1.37	0.42	0.79	11.34	12.61	2.10721	75	0
51.6	1.37	0.89	0.76	20.04	21.71	1.80618	60	0
47.6	1.37	0.27	0.68	5.71	6.86	2.18469	62	1
38.6	1.37	0.26	0.26	2.88	3.16	1.64345	76	0
38.4	1.37	0.86	0.7	3.62	5.33	2.02938	58	0
54.5	1.37	0.65	0.29	6.66	7.66	2.14301	84	1
44.6	1.38	0.2	0.14	7.78	8.17	1.86332	42	0
48	1.38	0.54	0.44	13.24	14.27	1.54407	75	0
43.1	1.38	0.86	0.03	5.41	6.33	2.34242	90	1
31.6	1.38	0.63	0.28	6.48	7.44	2.02938	66	0
45	1.38	0.29	0.18	6.34	6.82	1.96379	83	1
38.3	1.38	0.57	1.07	7.72	9.41	2.03342	63	0
56.9	1.38	1.29	1.49	22.39	25.27	2.07918	63	1
52.8	1.39	0.2	0.03	2.91	3.15	2.09691	19	0
46.4	1.39	0.39	0.21	8.3	8.92	1.88081	68	1
49.1	1.39	0.47	0.32	13.94	14.75	2.1959	68	0
54.4	1.39	0.62	0.76	3.57	4.95	2.26245	66	0
39.1	1.39	0.65	0.16	8.23	9.07	1.07918	57	0
54.9	1.39	0.59	0.06	8.18	8.86	1.90309	56	0
40.4	1.4	0.8	0.68	38.12	39.79	1.72428	59	0
34.5	1.4	0.85	0.51	1.74	3.12	1.85733	62	1
37.2	1.4	0.71	0.43	13.05	14.2	2.32428	69	0
58.4	1.4	0.12	0.16	3.23	3.51	2.23805	61	1
37.1	1.4	0.38	0.59	20.12	21.09	2.03342	77	0
42.7	1.4	0.84	0.76	18.71	20.45	1.97313	70	0
34.3	1.4	0.63	0.88	8.47	10.01	2.26717	70	0
41.7	1.41	0.67	0.64	29.32	30.67	2.59106	77	1
51.2	1.41	2.05	1.12	11.36	14.75	2.1038	49	1
45.4	1.41	0.37	0.17	9.67	10.21	2.80821	81	0
35.8	1.41	0.38	0.35	8.92	9.68	1.74819	70	1
31.2	1.41	0.72	1.07	22.98	24.79	2.30535	70	0
37.9	1.41	0.75	0.3	14.98	15.67	1.38021	63	1
44.1	1.41	0.36	0.27	9.24	9.87	2.09691	72	0
50.8	1.42	0.18	0.12	14.32	14.66	1.99564	81	0
63.2	1.42	0.39	0.15	18.68	19.32	1.64345	69	1
46.3	1.42	0.75	0.26	11.5	12.54	2.35984	54	0
40.5	1.42	0.79	2.47	19.77	23.1	2.0569	65	1
39.7	1.42	0.14	0.37	8.93	9.45	1.99123	78	1
48.4	1.43	0.66	1	26.97	28.66	2.20952	49	0
47.7	1.43	0.41	0	3.92	4.34	2.2878	74	0
54.4	1.43	0.23	0.08	11.21	11.54	2.17319	82	1
37.7	1.43	0.87	0.13	8.32	9.34	1.99564	50	0
45.4	1.43	0.56	1.05	13.13	14.75	2.02938	34	0
35.7	1.43	1.47	0.74	13.12	15.43	1.91381	69	1
42.5	1.43	0.89	0.74	9.89	11.65	2.57054	89	0
37.1	1.43	0.77	0.26	16.39	17.47	2.08991	27	0
300	1.43	0.89	0.5	11.34	12.73	2.31387	18	0
36.4	1.44	0.24	0.16	5.29	5.7	2.0607	94	0
49.9	1.44	1.16	1.05	26.83	29.1	2.23045	52	0
45.4	1.44	0.86	0.32	4.84	6.16	2.36361	39	1
42.8	1.44	0.74	0.98	21.15	23.24	1.98227	80	0
50.7	1.45	0.48	0.39	13.22	14.46	2.07918	56	0
49	1.45	1.1	1.06	35.77	38.01	1.54407	34	0
37.6	1.45	0.75	0.46	19.67	20.9	1.53148	34	0
43.8	1.45	0.42	0.39	16.14	16.97	2.13672	83	0
46.9	1.45	0.56	0.7	16.61	17.96	2.11394	73	1
61.4	1.46	0.72	0.32	4.2	5.36	2.01284	43	1
45.7	1.46	0.97	0.62	29.64	31.23	1.96379	75	0
50.5	1.46	0.9	0.19	11.22	12.34	2.43616	80	1
50.4	1.46	0.6	0.74	15.19	16.53	2.17898	25	0
44.9	1.46	0.69	0.1	19.96	20.81	1.69897	89	0
23.5	1.46	0.4	0.19	10.58	11.22	2.07555	57	1
31.5	1.46	1.1	0.8	13.53	15.46	2.17026	77	1
47	1.47	0.27	0.18	12.25	12.71	1.81954	49	0
51	1.47	0.62	1.12	6.65	8.5	1.57978	80	1
49.9	1.47	0.41	0.47	6.16	7.04	2.67852	66	0
46.8	1.47	0.26	0.3	6.83	7.4	2.05308	76	0
34.9	1.47	0.28	0.58	12.9	13.77	2.57864	67	0
41.3	1.47	0.88	0.41	14.63	15.95	2.55509	51	0
35.6	1.48	0.83	0.35	14	15.39	2.00432	79	0
65	1.48	0.3	0.19	5.8	6.33	2.17026	86	1
39.5	1.49	0.52	0.64	13.62	14.79	2.0569	77	0
69.4	1.49	0.6	0.69	9.37	10.66	2.32015	74	0
53.1	1.49	0.66	0.31	2.67	3.77	1.83251	49	1
32.9	1.5	0.91	0.52	20.13	21.58	2.8293	62	0
43.4	1.5	0.4	1.23	16.38	18.02	2.27416	77	0
51.1	1.5	0.99	0.99	18.93	20.99	2.58883	57	0
39.2	1.5	0.73	0.97	16.86	18.69	2.46835	73	0
29.1	1.5	0.25	0.47	13.4	14.15	2.13354	56	0
58.1	1.51	0.48	0.12	14.33	14.93	2.0569	67	1
62.5	1.51	0.13	0.1	3.13	3.38	1.95424	69	1
33.9	1.51	0.64	0.49	12.4	13.69	2.15836	45	0
55.4	1.51	0.52	0.26	6.69	7.53	1.81954	74	0
81.8	1.51	0.71	0.54	22.41	23.69	2.60531	75	1
54.6	1.52	0.37	0.58	9.75	10.7	2.1271	47	1
43.4	1.52	0.34	0.81	10.49	11.68	1.82607	66	0
46.5	1.52	0.23	0.06	9.03	9.5	2.63548	70	1
31.9	1.53	0.38	0.26	1.15	1.79	2.43457	59	1
45.4	1.53	0.19	0.1	5.71	6.06	2.12057	68	1
56.3	1.53	1.99	2.28	23.06	28.47	1.70757	75	0
40.8	1.53	1.42	1.61	17.81	20.86	2.42813	83	0
54.8	1.53	0.53	0.91	5.53	6.97	2.27646	57	0
50.3	1.54	0.56	0.53	10.43	11.68	2.59218	62	0
46.4	1.54	0.57	0.26	16.48	17.3	1.89763	91	1
57.6	1.54	0.55	0.68	12.55	13.79	2.3784	91	1
45	1.54	0.84	0.13	6.44	7.42	2.45939	36	1
42	1.55	0.49	0.16	4.66	5.76	2.26007	46	1
44.9	1.55	0.82	0.37	4.57	6.07	2.25527	68	0
106	1.55	0.57	0.08	1.43	2.2	1.64345	49	1
28.5	1.55	0.75	1.34	13.9	16.01	2.57287	48	0
42.5	1.55	0.67	1.01	3.5	5.19	1.81291	71	0
40.6	1.56	0.35	0.14	2.88	3.39	2.45939	80	0
47.2	1.56	0.36	0.55	3.33	4.25	2.07555	51	0
40.8	1.56	0.68	1.26	28.87	30.84	2.67394	64	1
27.5	1.56	0.64	1.06	23.02	24.75	2.3927	70	0
68.8	1.57	1.51	1.61	27.26	30.42	2.48287	55	0
58.3	1.58	0.82	0.59	18.2	19.63	1.30103	77	0
45.1	1.59	0.58	0.29	5.36	6.27	2.63548	70	1
50.8	1.59	0.85	0.79	12.93	14.58	2.10037	86	1
54.9	1.6	0.34	0.13	10.94	11.41	1.74819	71	0
41.8	1.6	0.88	0.16	9.86	10.94	2.14301	55	0
62.4	1.61	0.2	0.05	24.94	25.19	1.93952	82	0
41.5	1.61	0.31	1.05	18.08	19.53	2.31806	65	0
39.7	1.61	0.64	0.94	9.03	10.71	1.88649	73	1
49.6	1.62	0.76	1.12	16.09	18.02	1.86923	72	0
41.4	1.62	0.38	0.87	18.58	19.81	1.80618	81	1
36	1.62	0.53	0.41	11.34	12.37	2.16137	65	0
39.4	1.63	0.62	0.67	24.51	25.85	2.27416	64	1
48.5	1.63	0.23	1.04	20.03	21.31	2.55388	71	1
42.5	1.65	0.96	0.67	35.34	37.04	1.92942	73	0
44.3	1.65	0.59	0.24	8.34	9.18	2.2833	77	1
37.1	1.65	0.96	1.09	23.77	25.86	2.61172	55	0
40.2	1.65	0.9	0.15	2.57	3.64	1.99564	65	0
36	1.65	0.33	0.33	3.81	4.22	1.97772	73	1
50.3	1.66	0.74	0.6	14.02	15.44	1.60206	76	0
54.5	1.66	0.46	0.54	7.22	8.24	2.12385	62	0
51.2	1.66	0.41	0.58	13.01	14.03	1.17609	66	0
40.5	1.66	0.4	0.55	18.14	19.13	2.02938	87	0
53.7	1.67	0.77	0.18	10.21	11.16	2.1959	69	1
30.2	1.67	2.31	1.06	24.35	27.89	1.07918	85	0
47	1.69	0.38	0.49	36.66	37.56	2.13672	53	0
68.4	1.72	0.47	0.14	8.46	9.09	2.0086	52	1
300	1.72	0.5	0.57	11.3	12.39	2.04532	62	0
42.6	1.76	0.55	0.23	3.34	4.57	0.477121	65	0
46	1.76	0.81	0.67	3.52	5.04	1.81291	74	0
40.4	1.76	0.51	1.11	14.32	15.97	1.90309	71	0
55.5	1.77	0.71	0.52	17.84	19.18	2.42488	60	0
43.8	1.77	0.69	1.74	23.01	25.62	2.36736	66	1
62.8	1.78	0.23	0.05	7.91	8.48	2.24055	53	1
43.2	1.78	0.47	0.13	6.72	7.33	2.2014	57	0
59.6	1.79	0.2	0.08	6.98	7.26	1.75587	74	0
47.8	1.79	0.73	0	21.25	24.26	2	53	0
72.2	1.79	0.35	0.01	3.01	3.4	1.59106	35	0
22.4	1.8	0.8	1	9.36	11.2	2.233	73	1
45.1	1.8	0.42	0.98	15.99	17.44	2.00432	84	1
51.8	1.81	0.68	0.71	19.34	20.75	1.72428	71	0
70.7	1.82	0.63	0.04	3.82	4.5	1.93952	35	1
53.3	1.84	0.12	0.1	4.03	4.26	1.77815	24	0
52.8	1.85	0.68	0.5	19.31	20.5	1.92942	68	0
52.7	1.86	0.97	0.28	2.93	4.22	2.24551	31	0
46.9	1.87	0.4	0.11	10.54	11.05	2.42488	45	1
127.6	1.89	0.47	0.24	13.58	14.35	1.20412	50	1
55.9	1.91	0.47	0.47	15.97	16.94	1.47712	52	0
66.2	1.91	0.25	0.19	8.62	9.07	1.85733	40	1
49.7	1.92	0.69	0.59	15.74	18.09	1.60206	74	1
58.8	1.92	0.37	1.23	24.51	26.27	2.05308	50	1
69.3	1.92	1.44	0.24	22.6	24.46	1.59106	33	1
46.2	1.94	0.55	0.43	4.98	5.97	1.78533	68	0
69.8	1.95	0.43	0.03	11.89	12.37	1.60206	61	0
75.7	2	0.61	0.23	14.41	15.6	1.60206	60	0
49.4	2.01	0.26	0.28	6.98	7.56	2.07918	61	1
48	2.01	0.49	0.07	1.78	2.37	1.91381	78	1
50.4	2.02	0.35	1.05	21.77	23.23	1.88081	80	0
104.8	2.05	0.54	0.78	7.63	8.96	1.91908	53	1
35.1	2.05	0.81	0.12	1.48	2.41	2.13988	81	1
43.7	2.08	0.56	1.4	14.45	16.42	1.85733	56	0
39.9	2.09	0.23	0.48	6.72	7.43	2.06446	80	0
48.9	2.13	0.54	0.24	13.08	13.89	2.26717	46	0
60.2	2.15	0.19	0.62	5.32	6.16	1.716	77	0
55.4	2.16	0.27	0.14	3.52	3.94	1.83251	72	1
53.9	2.17	0.39	0.1	5.54	6.05	2.25042	55	1
69.1	2.26	1.68	0.41	12.21	14.47	2.23553	68	1

## Sheet: eICU
aPTT	INR	Lymphocytes	Monocytes	Neutrophils	White_Blood_Cells	Platelet_Count	age	dead
38	1	1.2	0.6	2.8	10	1.47712	68	1
32	1.8	2	0.8	12.6	20	2.38202	60	0
36	1.1	1.11	1.221	7.659	11.1	2.17609	72	0
32	1.3	0.744	0.93	6.696	9.3	2.24055	68	0
39	3.7	0.99	0.495	15.015	16.5	2.31597	60	1
34	2.2	0.64	0.48	13.6	16	2.08991	65	0
40	1.3	0.738	2.46	21.402	24.6	2.31175	62	1
25	0.9	0.413	0.118	5.369	5.9	2.15836	57	0
50	1.9	1.82	0.884	2.392	5.2	2.18469	39	0
30	0.9	3.206	0.458	19.007	22.9	2.43933	38	0
29	1.3	0.78	1.69	10.53	13	2.18469	55	0
21	1.2	1.659	0.474	5.688	7.9	2.17609	72	0
33	1	0.65	1.3	10.92	13	2.31175	79	0
54	1.1	1.936	1.573	8.591	12.1	2.17898	66	0
21	1.1	0.984	1.23	9.963	12.3	2.40312	61	0
39	3.8	0.426	0.639	6.035	7.1	2.37107	90	0
29	1.1	0.693	0.495	8.712	9.9	2.03342	52	0
40	5.1	0.792	0.495	8.514	9.9	1.89209	77	1
43	1.5	0.332	1.162	6.806	8.3	1.75587	48	0
65	3.7	1.944	1.62	12.636	16.2	2.3962	35	1
30	1.5	0.627	1.254	18.81	20.9	2.24055	56	0
28	1.5	0.33	0.165	2.97	5.5	1.51851	44	0
48	1.7	2.541	0.462	16.632	23.1	2.50651	60	0
53	1.7	0.188	0.235	4.23	4.7	2.37107	56	0
32	1.1	1.15	0.46	9.66	11.5	2.55388	63	0
30	1.3	0.74	0.925	16.65	18.5	2.38739	50	0
29	1.2	0.97	1.067	7.566	9.7	2.32838	67	0
97	4.4	1.56	0.585	17.355	19.5	2.02119	78	1
53	5.5	1.155	1.485	13.035	16.5	2.35411	68	0
31	1.1	3.002	1.422	10.902	15.8	2.4133	49	0
37	3.8	0.61	0.976	10.614	12.2	2.1271	90	0
40	1.1	0.749	0.749	6.955	10.7	2.3962	67	0
30	1.3	0.308	0.462	12.628	15.4	2.29667	82	0
23	1.2	2.032	0.889	9.525	12.7	2.33846	67	0
30	1.1	0.459	1.377	12.852	15.3	2.41664	64	0
28	1.2	1.359	1.057	12.684	15.1	2.08991	53	0
26	2	0.039	0.351	2.652	3.9	2.12057	63	0
28	1	1.386	1.512	9.45	12.6	2.33244	69	0
56	2.6	0.426	1.42	12.212	14.2	2.60746	65	0
38	1.1	0.561	0.187	17.204	18.7	2.52892	55	0
27	1	0.388	0.097	9.215	9.7	2.14613	66	0
26	1	0.88	0.528	16.016	17.6	1.88649	67	0
34	1.5	0.441	0.049	2.499	4.9	2.56703	69	1
32	1.4	0.314	0.471	15.229	15.7	2.2014	71	1
37	1.7	2.208	0.966	10.35	13.8	2.54407	68	0
25	1	0.66	1.76	19.58	22	2.11059	84	0
26	1.1	0.516	1.29	23.994	25.8	2.22531	56	0
38	1.9	0.442	0.494	1.638	2.6	1.62325	51	0
27	1.4	1.162	0.664	11.952	16.6	2.42975	51	0
45	2.1	0.979	0.445	7.476	8.9	1.87506	51	1
27	1	1.7	0.8	7.5	10	2.23553	52	0
24	1.2	1.485	2.376	25.839	29.7	2.47422	69	1
36	2.6	0.936	0.468	21.294	23.4	2.16732	64	1
24	1	1.825	0.584	4.745	7.3	2.12057	29	0
27	1.1	0.915	0.366	17.019	18.3	2.26007	77	1
34	1.3	0.64	0.512	3.456	6.4	2.3483	83	0
27	1.2	1.156	0.867	26.877	28.9	2.58546	84	1
44	2.7	0.495	0.594	8.712	9.9	1.6902	90	0
34	3.3	0.525	0.315	9.66	10.5	2.13354	59	0
32	1.2	0.75	2.25	12	15	2.2878	48	0
38	0.9	1.728	0.648	18.36	21.6	2.43933	53	0
31	1.4	0.288	0.36	5.112	7.2	0.69897	31	1
26	1	0.291	0.679	8.439	9.7	2.25042	68	0
27	1.4	1.256	0.628	28.888	31.4	2.35411	61	1
21	3.7	0.2	0.32	3.2	4	2.14301	65	0
27	1.1	0.74	0	8.732	14.8	2.3075	69	0
34	1.1	1.072	0.536	11.792	13.4	2.12057	42	0
33	1.6	0.338	0.169	12.844	16.9	2.18752	77	0
37	1.3	1.68	2.52	23.8	28	1.88081	83	1
59	1.1	0.464	0.464	10.672	11.6	2.09342	75	0
23	1.1	0.22	0.044	1.936	2.2	0.90309	64	0
41	1.2	1.53	1.36	13.94	17	2.3962	58	0
35	1.1	2.074	0.854	9.272	12.2	2.37291	43	0
29	1.7	0.339	0.678	18.645	33.9	1.30103	32	1
33	1.1	0.615	1.23	18.04	20.5	2.49969	25	0
80	1.5	2.025	0.891	5.022	8.1	2.4014	63	0
26	1.2	2.121	1.01	6.969	10.1	2.13988	46	0
37	4.5	0.368	0.368	8.28	9.2	2.233	71	1
31	1.3	2.5	0.5	9.5	12.5	2.13354	77	0
63	1.7	0.144	0.288	6.552	7.2	1.36173	58	1
31	1	0.127	0.254	10.668	12.7	2.13672	73	0
31	1.4	1.232	0.792	6.776	8.8	2.23045	90	0
34	2.7	0.14	0.56	4.69	7	2.19312	61	1
32	1.1	0.452	0.904	7.91	22.6	2.52892	63	0
26	1.1	0.624	1.404	13.416	15.6	2.11059	54	0
30	1.1	0.76	0.494	2.394	3.8	2.18469	80	0
29	1.3	0.846	1.128	12.126	14.1	2.29667	67	0
50	2.3	0.579	0.965	16.791	19.3	2.44091	68	0
22	1.1	1.33	0.19	1.824	3.8	1.91908	54	1
30	1	0.412	0.206	19.982	20.6	2.15534	70	0
27	1.1	0.296	0.074	7.03	7.4	2.29447	78	0
38	7.4	1.302	1.302	15.81	18.6	2.6721	87	0
25	1	2.43	2.106	10.854	16.2	2.23045	86	0
46	1.9	2.375	0.5	9.625	12.5	1.88081	45	0
145	1.2	1.404	1.638	20.124	23.4	2.38561	90	0
40	1.5	0.734	1.468	31.929	36.7	2.28556	61	1
28	1.2	1.09	1.308	19.402	21.8	1.92428	71	0
34	1.3	0.348	0.087	2.407	2.9	1.86332	68	1
29	1.1	2.205	0.245	17.395	24.5	2.11727	50	0
28	1.5	1.253	1.611	12.351	17.9	2.52634	85	1
62	1.5	1.098	0.976	10.126	12.2	2.21219	75	0
53	1.4	1.374	0.687	19.236	22.9	2.4609	58	0
58	1.2	1.13	1.356	20.114	22.6	2.45788	86	1
44	1.2	0.308	0.028	2.464	2.8	2.26482	60	0
39	3.9	0.495	0.495	8.91	9.9	2.09342	57	1
38	1.7	0.71	1.278	12.07	14.2	2.24797	60	1
41	2	3.588	0.828	9.384	13.8	1.88649	76	1
24	1.1	1.332	1.332	27.306	33.3	2.48714	71	0
31	1.1	0.17	0.17	6.46	8.5	1.96848	55	0
27	1.1	0.768	0.896	11.136	12.8	2.17609	62	0
35	1.1	0.648	0.405	7.047	8.1	2.42813	63	0
63	4.6	0.546	0.364	17.29	18.2	2.20412	77	0
29	1	1.52	0.342	1.862	3.8	2.16137	52	0
26	1	1.207	0.923	4.899	7.1	2.24551	70	0
44	1.6	1.206	1.206	17.487	20.1	2.32838	83	0
46	3.3	0.105	0.21	9.765	10.5	2.47567	80	0
32	1.1	1.3	2.6	22.1	26	2.60206	52	0
53	1.1	1.188	1.188	17.424	19.8	2.31387	77	0
31	1.2	1.904	1.428	20.468	23.8	2.33846	60	0
29	1.3	1.85	0.592	4.958	7.4	2.38021	45	0
32	1.3	0.465	0.465	6.417	9.3	2.38202	46	0
44	1.9	0.402	0.804	8.71	13.4	1.43136	65	1
31	1.1	1.3	0.455	4.68	6.5	2.43616	47	0
26	1.2	2.256	1.504	15.04	18.8	2.27646	65	0
31	4.6	0.635	1.016	11.049	12.7	2.1959	80	0
34	1.2	0.333	1.332	25.641	33.3	2.38917	77	0
23	1.3	0.936	0.624	6.162	7.8	2.33445	77	0
32	1.2	1.368	1.026	14.706	17.1	2.14613	88	0
41	3.1	0.18	0.012	0.852	1.2	1.79934	59	1
65	6.9	0.21	0.315	6.93	10.5	2.27875	73	0
32	3.8	0.663	1.326	20.111	22.1	2.56703	81	0
42	1.7	0	0	11.9	14	1.88081	70	0
26	1.3	1.104	0.736	16.56	18.4	2.81291	56	0
57	1.1	1.771	0.966	13.202	16.1	2.22531	65	0
31	1	2.16	1.89	22.68	27	1.90309	24	0
63	1.8	0.936	1.17	20.124	23.4	1.66276	48	0
37	1.6	0.9	0.108	1.728	3.6	2.02531	79	0
43	1.9	0.506	0.506	24.288	25.3	2.22011	78	0
24	1.1	3.48	1.45	9.57	14.5	2.20952	75	0
33	1.2	0.648	0.36	6.12	7.2	2.1959	90	1
30	0.9	0.735	0.049	4.116	4.9	2.25527	80	1
91	1.2	0.378	0.189	5.733	6.3	2.14922	67	0
35	1.6	0.74	0.925	16.835	18.5	2.43933	41	0
35	1.3	0.888	1.184	9.176	14.8	2.47422	44	0
37	1.7	1.196	1.288	6.624	9.2	2.27646	36	0
46	1.2	0.126	0.252	12.222	12.6	2.35411	67	0
24	1	1.161	1.161	10.578	12.9	2.27184	51	0
28	1.3	0.896	0.448	17.248	22.4	2.29885	90	0
27	1.1	0.873	2.328	19.788	29.1	2.44404	34	0
37	1.1	4.878	2.168	19.783	27.1	2.62531	67	0
72	1.5	1.422	2.054	12.008	15.8	2.11394	71	0
49	2.1	1.005	1.005	18.09	20.1	2.31597	84	1
56	3.1	1.278	0.639	4.757	7.1	2.30103	54	0
24	1.1	0.847	1.452	9.801	12.1	2.34439	59	0
28	1.1	1.38	0.69	9.315	11.5	1.92942	71	1
47	1	0.26	0.13	6.11	6.5	2.22789	72	0
31	1.2	1.27	1.016	22.606	25.4	2.40483	71	0
37	1.2	0.531	0.059	4.897	5.9	2.13033	82	0
51	2.8	0.94	1.692	16.168	18.8	2.18184	61	0
30	1.2	0.82	0.82	14.596	16.4	2.13033	68	0
70	1.4	1.256	1.57	28.574	31.4	2.65896	69	0
93	1.3	0.968	0.242	10.89	12.1	2.17319	80	1
31	1.2	1.04	1.248	18.512	20.8	2.34044	81	0
25	1.5	0.4	0.8	8.8	10	1.72428	72	0
34	1	0.549	0.488	5.063	6.1	1.99564	71	0
26	1.8	3.247	1.91	13.943	19.1	2.07555	57	0
50	3.2	0.345	0.92	10.235	11.5	1.83885	84	0
22	4.3	0.66	0.528	5.412	6.6	2.3075	71	0
119	1.3	0.955	0.955	17.19	19.1	2.17026	66	0
48	1.7	0.156	0.078	7.02	7.8	1.716	42	0
93	2.5	0.75	0.875	9.75	12.5	1.88081	64	1
40	1.4	0.236	0.236	10.266	11.8	2.23045	71	0
36	1.3	0.79	0.79	14.22	15.8	2.37107	71	0
38	1.4	0.305	3.355	25.01	30.5	2.51455	71	0
28	1.2	0.455	0.182	8.463	9.1	2.15836	81	0
28	1.4	1.136	0.284	12.78	14.2	2.17319	60	0
115	2.2	0.14	0.14	6.65	7	1.5682	52	1
30	1.8	0.175	0.035	3.29	3.5	1.73239	51	0
43	1.4	0.306	0.153	11.475	15.3	2.30963	87	0
38	1.1	0.725	0.435	13.34	14.5	2.35218	63	0
37	1.3	0.86	1.29	19.135	21.5	2.38917	83	0
34	4.1	0.256	0.512	20.48	25.6	2.34635	49	0
40	1.7	2.205	1.89	27.405	31.5	1.98227	56	0
26	1.1	0.576	0.054	0.594	1.8	1.54407	73	0
27	1.2	0.46	0.115	10.925	11.5	2.34635	66	0
37	1.2	1.12	1.54	11.34	14	2.41497	62	0
28	0.9	0.387	0.344	3.569	4.3	2.33445	46	0
41	1.2	0.462	0.154	5.929	7.7	2.18469	60	0
33	1.1	0.498	0.249	7.553	8.3	2.15836	73	0
46	1.2	0.285	0.19	8.455	9.5	1.96848	68	0
43	1.6	1.692	3.102	20.022	28.2	1.85733	33	0
43	1.1	0.44	0.77	4.29	5.5	2.0086	90	0
39	1.8	1.086	1.086	15.928	18.1	2.24797	22	0
33	1.1	0.464	1.16	21.576	23.2	2.34635	64	0
23	1.1	0.345	0.138	6.21	6.9	2.12057	84	0
39	1.3	0.264	0.132	12.804	13.2	2.29226	47	0
78	1.3	0.714	0.952	10.234	11.9	2.4609	90	0
25	1.2	151.4	1.514	0	151.4	1.83251	62	1
33	1.7	0.775	0.775	13.95	15.5	2.85065	65	0
44	1.9	1.36	1.36	20.128	27.2	2.1959	87	1
50	1.2	0.785	0.628	14.287	15.7	2.16435	69	0
31	1.1	3.78	1.08	22.14	27	2.26245	66	0
29	1.2	0.177	0.295	5.428	5.9	1.95424	79	1
31	1.2	0.535	0.321	8.132	10.7	2.13988	74	0
47	1.3	10.925	5.681	15.295	43.7	1.72428	84	0
36	1.9	0.96	1.6	13.44	16	2.15229	64	0
38	2	0.364	0.546	15.652	18.2	2.4624	79	1
26	1	0.816	0.528	3.408	4.8	1.89763	58	0
26	1.2	1.357	0.767	3.658	5.9	2.3962	29	0
32	1.3	0.564	0.47	8.366	9.4	2.09342	59	0
58	2.4	8.569	1.353	28.413	45.1	2.15534	22	0
129	1.1	2.6	0.325	26	32.5	2.46687	61	0
29	1.4	0.61	1.586	9.882	12.2	2.70842	27	0
30	1.1	1.87	1.02	13.6	17	2.43616	53	0
29	1.7	1.337	1.337	12.797	19.1	1.90849	58	1
120	1.3	0.7	1.4	31.5	35	2.68034	68	1
48	1.1	0.854	0.122	6.344	12.2	2.43933	86	0
30	1.2	0.745	0.745	13.41	14.9	2.38561	81	0
38	1.4	0.464	1.624	19.488	23.2	2.66464	39	0
38	2.1	0.7	0.7	12.6	14	2.18469	72	0
24	1	1.309	1.683	15.521	18.7	2.32222	24	0
27	1.2	1.057	1.057	12.986	15.1	2.26717	74	0
24	1.6	0.775	0.31	9.61	15.5	1.88649	90	0
35	1.1	0.637	0.273	5.46	9.1	2.5172	76	0
46	4.8	1.808	0.904	8.475	11.3	2.11394	90	0
27	1	1.05	0.84	19.11	21	2.19312	67	0
37	1.4	2.028	1.69	12.337	16.9	2.24797	55	0
63	1.5	0.35	0.28	2.835	3.5	1.47712	70	1
25	1.1	0.917	0.786	11.266	13.1	2.59988	79	0
34	1.4	2.08	0.16	12.96	16	2.43457	74	0
40	2	1.524	1.524	9.652	12.7	1.81291	19	0
45	1	0.51	0.306	8.262	10.2	2.21748	83	0
24	1.2	0.471	0.471	12.56	15.7	2.59879	76	0
31	1.4	0.153	0.081	0.36	0.9	1.96379	64	0
37	1.9	0.91	0.42	5.67	7	1.99123	71	0
31	7.9	0.387	0.645	11.868	12.9	2.20952	61	0
51	1.2	0.536	1.876	8.844	13.4	1.83885	77	1
25	1.2	2.888	1.064	11.248	15.2	2.48287	75	0
42	2.4	1.656	1.035	18.009	20.7	2.57403	71	0
37	1.1	0.73	1.46	34.31	36.5	1.68124	54	0
31	1.1	1.116	0.54	1.944	3.6	2.51055	74	0
26	1	0.67	1.206	11.524	13.4	2.25285	43	0
26	1.2	1.664	0.512	4.16	6.4	2.38917	68	0
39	3.2	0.616	0.968	7.216	8.8	1.96848	69	0
27	2.8	0.705	0.705	12.69	14.1	2.43933	53	0
22	1.1	3.212	1.46	21.608	29.2	2.24055	78	0
33	1.1	2.376	0.432	7.02	10.8	2.26007	82	0
38	1.3	0.441	0.441	13.671	14.7	2.32222	56	0
34	1.2	1.008	1.008	10.584	12.6	2.72016	52	0
25	1.3	0.882	1.47	27.048	29.4	2.13033	56	0
27	1.2	1.602	0.89	15.308	17.8	2.22011	77	0
23	1.4	0.912	0.342	10.146	11.4	2.09342	79	0
61	1.5	1.536	0.576	1.856	6.4	2.64444	67	1
38	1.1	0.98	1.225	17.885	24.5	2.54283	63	0
43	6.3	0.105	0.315	8.715	10.5	2.19033	64	0
28	1.1	0.352	0.352	14.256	17.6	2.35025	84	1
32	1.1	0.672	1.008	9.52	11.2	2.42813	54	0
35	1.3	1.344	1.512	13.608	16.8	2.56937	42	0
32	1	1.176	0.504	15.12	16.8	2.48855	81	0
40	2.7	0.792	1.008	5.4	7.2	2.32428	72	0
46	2.6	1.078	0.882	7.252	9.8	2.3784	76	1
30	1	1.275	1.02	23.205	25.5	2.42651	59	0
52	1.7	0.404	1.212	8.383	10.1	2.2878	70	1
32	1.2	1.24	1.488	22.072	24.8	2.48714	57	0
53	1.1	2.37	0.553	4.898	7.9	2.18752	70	1
36	2	0.357	0.408	4.335	5.1	2.15229	90	0
34	1.1	0.378	0.252	5.607	6.3	2.35603	58	0
25	1.3	1.92	2.88	14.4	19.2	2.50651	74	0
32	2.8	1.589	0.908	20.203	22.7	2.63043	74	0
21	1.1	1.36	0.51	15.13	17	2.50243	61	0
40	1.2	0.87	0.87	15.66	17.4	2.47422	85	0
24	1.1	0.726	0.726	22.748	24.2	2.43136	80	0
36	1.3	0.504	0.126	3.57	4.2	1.54407	52	0
32	1.7	3.036	0.414	10.35	13.8	1.97313	53	0
29	1.2	0.91	0.91	10.66	13	2.26951	60	0
35	1.3	0.86	1.505	19.135	21.5	2.44716	79	1
33	1.3	0.609	0.87	6.873	8.7	1.85733	65	0
33	1.2	0.6	1	17.4	20	2.03342	88	0
37	1.1	0.447	0.149	14.304	14.9	2.50106	90	0
45	8	0.62	0.744	10.912	12.4	1.81291	59	0
27	1.2	0.364	0.364	17.29	18.2	2.8293	64	0
43	1.1	0.212	0.636	20.352	21.2	2.48855	69	0
196	1.9	0.904	1.695	8.701	11.3	1.94939	83	1
33	1.3	0.888	1.332	19.98	22.2	2.27875	79	0
35	1.3	0.48	0.96	18.24	24	2.20952	59	1
41	2.3	0.268	0.268	6.164	6.7	1.62325	83	0
24	1.1	0.068	0.068	3.264	3.4	2.58995	67	0
31	1.3	0.94	0.94	21.62	23.5	2.03743	26	0
50	1.3	0.445	0.534	7.921	8.9	2.32838	90	0
37	5.5	0.69	0.69	17.48	23	2.41996	77	0
26	1.1	0.864	0.216	4.32	5.4	2.10037	66	0
25	1.1	2.278	0.804	10.318	13.4	2.31175	53	0
95	2.6	0.113	0.113	3.616	11.3	1.83251	46	1
25	1.8	1.368	0.432	5.4	7.2	1.88649	53	0
23	1.2	0.594	0.528	5.412	6.6	2.07555	67	0
59	1.4	0.162	0.054	1.566	1.8	1.61278	80	0
35	1.3	1.036	1.554	23.31	25.9	2.35218	67	0
27	1.4	1.062	2.301	10.62	17.7	2.40483	33	0
40	1.1	2.09	0.88	6.82	11	2.58546	49	0
31	1.4	0.196	1.96	14.896	19.6	2.36549	65	0
26	1	0.847	0.363	10.89	12.1	2.35793	67	0
35	1.6	1.425	1.14	25.935	28.5	2.28103	54	0
44	3	1.368	1.216	12.616	15.2	2.29226	90	1
42	6.4	0.741	0.741	23.218	24.7	2.17026	43	0
27	3.5	0.644	1.61	13.846	16.1	2.69461	42	0
63	4	0.875	1	10.625	12.5	2.38021	68	0
33	1.1	0.67	1.34	29.48	33.5	2.43616	61	0
36	1.4	0.672	1.008	31.92	33.6	2.31387	53	0
36	1.4	2.497	1.589	17.252	22.7	2.62941	39	0
29	1.1	1.111	1.313	7.676	10.1	2.38917	79	0
32	1.3	0.516	0.86	14.276	17.2	1.5563	80	0
29	1.5	1.01	0.505	8.585	10.1	2.26007	85	0
31	1.2	1.164	0.97	7.469	9.7	2.04922	72	0
38	1	0.27	0.135	13.095	13.5	2.24551	64	1
29	1.2	0.34	0.255	7.905	8.5	2.12385	80	1
30	1.3	1.23	1.722	21.402	24.6	2.4014	67	0
28	1.2	0.861	0.984	10.332	12.3	2.29667	85	0
28	1.4	0.45	0.3	6.75	7.5	1.44716	55	0
24	1.1	0.476	0.119	10.353	11.9	2.38739	52	0
36	2	1.518	1.265	22.011	25.3	2.43775	49	0
49	1.9	0.177	0.059	5.664	5.9	2	20	0
25	1.2	6.006	2.31	6.16	15.4	2.35411	54	0
66	2.6	1.638	1.638	7.02	11.7	1.66276	39	1
29	1.4	2.743	1.266	17.091	21.1	2.84261	62	0
25	1.2	0.42	0.38	0.2	1	2.06446	65	0
54	2.2	0.306	0.612	9.282	10.2	2.08636	82	0
32	1.4	0.92	0.92	8.096	9.2	2.25285	52	0
36	1.8	2.156	0.98	12.544	19.6	2.57054	78	0
34	1.1	0.78	0.078	1.716	2.6	0.778151	40	0
41	1.3	1.808	1.582	20.34	22.6	2.51587	78	1
28	1.5	0.966	1.127	14.007	16.1	2.34044	78	1
40	2.3	0.254	0.381	12.065	12.7	2.22531	83	0
30	1.1	0.81	0.54	10.665	13.5	2.45939	55	0
25	1.2	1.358	0.97	17.072	19.4	2.22272	66	0
37	1.4	2.548	1.372	15.484	19.6	2.47712	48	0
36	1.2	1.134	1.26	9.576	12.6	2.74036	57	0
43	2	0.366	0	11.834	12.2	2.10037	46	1
46	1.2	0.384	2.304	30.72	38.4	1.92428	86	0
36	2.8	1.057	1.661	12.382	15.1	2.20683	90	0
47	1.4	0.465	0.155	2.449	3.1	1.27875	51	0
33	1.5	1.044	0.348	26.1	34.8	2.19866	56	0
53	1.9	0.459	1.173	3.468	5.1	1.68124	78	0
35	1.4	0.092	0.069	1.15	2.3	1.8451	84	0
29	1.5	1.74	1.16	25.81	29	2.82672	68	0
33	1.3	2.052	0.513	14.364	17.1	2.37475	29	0
41	2.8	0.75	0.825	5.85	7.5	1.95904	66	0
29	1.1	0.744	1.86	9.796	12.4	2.39445	81	0
29	1.6	0.565	1.356	9.379	11.3	2.43457	59	0
43	1.4	1.65	0.99	12.375	16.5	2.48287	31	0
44	1.8	1.771	2.093	12.236	16.1	2.4843	70	0
36	1.1	1.728	0.432	11.52	14.4	2.27646	53	0
33	1	0.352	0.264	8.184	8.8	2.22789	47	0
31	1	0.312	0.416	8.736	10.4	2.03743	68	0
35	1.1	0.2	0.325	1.95	2.5	2.29003	59	0
22	1	1.215	1.215	21.627	24.3	2.17898	42	0
24	1	1.482	0.988	22.23	24.7	2.48855	40	0
56	1.8	1.17	0.54	7.29	9	1.65321	39	0
26	1.2	0.77	1.05	5.18	7	2.07918	42	0
39	1.3	1.068	0.534	23.763	26.7	2.63749	75	1
44	5.7	1.232	0.88	15.488	17.6	2.60531	71	0
33	1.7	1.239	0.826	3.481	5.9	1.83885	29	0
36	1.6	3.731	1.435	23.247	28.7	2.70927	27	0
34	1.4	2.556	3.195	15.123	21.3	2.45788	26	0
43	3.7	0.454	0.454	21.792	22.7	2.34044	68	0
35	5.8	0.891	2.079	26.73	29.7	2.22272	66	0
36	1.2	0.203	0.058	2.61	2.9	2.22789	46	0
42	2.6	2.028	0.546	3.9	7.8	2.66932	62	0
35	1.4	1.167	3.501	34.232	38.9	2.36173	54	1
32	1.3	0.664	0.664	15.106	16.6	2.04532	54	1
31	1.2	0.208	0.624	16.432	20.8	2.37475	61	0
32	1.1	1.302	0.868	19.53	21.7	2.41162	60	0
28	1.1	0.191	0.573	18.336	19.1	2.28556	69	0
27	1.2	1.328	1.162	14.11	16.6	2.26717	69	0
60	1.2	1.392	1.392	14.442	17.4	2.53529	72	1
29	1.1	1.095	0.876	19.929	21.9	2.71265	50	0
22	0.9	2.96	0.518	3.922	7.4	2.03743	54	0
25	1.1	0.715	0.55	4.125	5.5	2.10721	53	0
40	1.1	1.023	1.023	7.254	9.3	2.17898	80	0
25	1.3	1.16	2.32	25.52	29	2.55023	34	0
26	1.3	1.62	0.486	13.932	16.2	2.3927	52	1
70	1.9	1.288	0.184	5.06	9.2	2.21219	90	0
27	1.2	1.386	1.386	17.028	19.8	2.32634	62	0
30	1.5	2.936	1.835	30.461	36.7	2.7364	84	0
32	1.1	0.656	0.656	12.628	16.4	2.20683	74	0
45	2.8	0.938	0.134	5.628	6.7	2.18184	78	0
30	2.1	0.271	0.542	21.951	27.1	2.233	56	0
33	1.2	1.264	0.632	6.004	7.9	2.3483	50	0
37	1.8	1.024	0.768	11.008	12.8	2.22789	79	0
35	1.1	1.0676	0.942	28.5112	31.4	2.59439	46	0
39	1.6	2.093	1.196	25.116	29.9	2.49276	73	0
40.3	1.3	1.105	1.105	6.29	8.5	2.10721	87	0
36	1.5	0.4544	0.6745	5.7865	7.1	2.3784	66	0
34	1	0.435	0.261	2.146	2.9	2.14613	47	0
35	1.1	2.9502	0.6407	10.5492	14.9	2.40312	23	0
37	1.6	0.732	0.2196	12.261	18.3	2.0086	18	0
39	1.6	0.415	0.04	0.035	0.5	1.53148	67	1
55	1.2	0.6552	0.91	7.3983	9.1	2.15229	73	0
34.4	1.1	0.756	0.252	3.192	4.2	2.22789	45	0
127	1.4	0.456	0.608	5.928	7.6	2.53656	63	0
34	1	1.0788	1.7748	14.355	17.4	2.23553	56	0
25	1	0.7268	0.2291	6.9046	7.9	2.26951	75	0
35.5	1.4	1.309	1.2257	9.3296	11.9	2.6464	69	0
35.4	1.3	1.414	3.03	15.756	20.2	2.2878	87	0
21	1.3	0.5547	0.7611	11.1843	12.9	2.18184	60	0
28	1.1	0.5658	0.6279	5.4717	6.9	2.18184	88	0
29	1.2	0.632	1.4062	13.4932	15.8	2.40993	77	0
29	1.1	0.6594	0.6123	14.3184	15.7	2.38561	73	0
52	1.8	0.3	0.108	0.516	1.2	2.13672	82	0
34	1.3	0.4847	0.5764	11.8686	13.1	2.4183	56	0
37	1.1	0.8316	1.0032	11.3124	13.2	2.35603	63	1
32	1.3	0.144	0.198	0.954	1.8	1.73239	47	0
25	1.3	1.5433	1.6698	21.6568	25.3	2.31387	57	0
37	2.6	0.1403	0.1098	5.7767	6.1	2.02938	50	0
31	1.2	0.7238	0.6314	6.2139	7.7	2.07918	89	0
32.8	1.27	0.432	0.5832	20.5416	21.6	2.62014	75	0
25.4	0.97	0.7872	0.3608	7.0274	8.2	2.2014	32	0
48	1.5	0.083	0.008	0.046	0.1	0.778151	39	0
32	1.3	0.366	0.488	5.002	6.1	0.69897	25	0
59.6	4.8	58.1048	0.7852	15.704	78.52	2.35218	65	1
43	1.8	2.4308	0.8652	6.695	10.3	2.2878	89	0
30	1	0.472	0.178	1.186	2	1.74036	79	0
28	1.7	1.659	0.948	16.827	23.7	2.51188	52	0
36	1.5	0.755	0.906	5.889	15.1	2.4014	61	0
36.3	1.04	1.2152	0.6386	4.2408	6.2	2.03342	65	0
33	1.1	5.5611	3.5631	23.31	33.3	2.23045	56	0
35	1.5	0.168	0.168	14.112	16.8	2.18752	43	0
21	1	1.0731	0.4599	5.6137	7.3	2.16435	82	0
51	2	0.584	0.704	6.384	8	2.35025	78	0
32.3	2.23	0.5796	1.4628	24.3984	27.6	2.13354	53	0
49	1.4	0.4816	1.376	6.6478	8.6	2.17898	58	0
32	1.1	1.1481	1.5486	23.7363	26.7	2.66839	50	0
36	1.7	2.152	1.1836	23.2416	26.9	2.4843	73	0
49	1.1	0.3978	0.3198	1.742	2.6	1.94939	65	0
32	1.2	1.8054	1.0404	7.1094	10.2	2.29447	56	0
31	1	0.52	0.6448	19.6144	20.8	2.35411	61	0
43	1.8	0.8479	0.5246	4.6848	6.1	2.17898	69	1
46	3.3	0.5616	0.6858	4.1094	5.4	2.24551	73	0
43	1.5	1.224	0.85	14.671	17	2.24304	72	1
30	1.3	1.591	1.161	39.13	43	2.57519	64	0
30	1.2	2.4402	3.1458	23.5494	29.4	2.37658	60	0
47.9	1.95	0.36	0.06	1.95	3	1.27875	66	0
34	1.2	1.5618	1.1782	24.4408	27.4	2.53275	85	0
69	4.1	0.5267	0.0458	22.1672	22.9	2.38917	73	0
34	1.4	0.9943	1.2062	13.8713	16.3	2.49136	40	0
46.4	1.5	1.2	1.6	26	40	2.26482	90	0
51	1.2	0.33	0.528	1.419	3.3	1.74036	68	0
38	1.6	0.792	0.792	34.452	39.6	2.3075	78	0
38.6	2.06	0.349	0.698	27.222	34.9	2.49969	77	0
38	1.1	1.1008	1.7664	21.8624	25.6	2.49969	69	0
32	1.2	1.191	4.764	25.805	39.7	2.75435	49	0
34	1.2	0.4137	0.2364	18.8332	19.7	2.42813	61	0
29	1	0.9384	0.8832	16.4312	18.4	2.53529	62	0
36	1.3	0.3976	0.5964	12.993	14.2	2.04532	80	0
50.9	1.4	0.9672	1.1544	8.1744	10.4	2.08991	84	0
40.8	1.8	1.695	0.791	8.475	11.3	2.22789	29	0
41	2.4	0.566	0.566	26.602	28.3	2.14922	67	0
24	3.15	0.8684	1.2859	14.2952	16.7	2.36922	69	1
32	1	0.972	1.431	24.273	27	2.34439	77	0
26	1.2	3.509	2.871	25.201	31.9	2.47857	30	0
31.8	1.3	0.8998	1.1452	14.2823	16.36	2.37658	48	0
31.1	1.62	0.18	0.14	4.64	5	1.89209	85	1
33	1.8	0.84	1.155	8.505	10.5	2.26007	60	0
31.4	1.47	0.8502	0.3924	9.6029	10.9	2.37107	78	1
87.8	1.33	0.4648	0.7968	14.9898	16.6	2.1959	82	0
34	1	0.207	0.069	1.886	2.3	1.6721	58	0
39	2.8	0.456	0.228	4.731	5.7	2.53782	60	0
28.1	1.27	0.3872	0.5632	16.6144	17.6	2.18469	71	0
25	1.1	1.8094	0.7553	5.5942	8.3	2.39794	65	0
52.1	3	0.572	0.936	11.206	13	1.62325	75	0
33	1.5	0.248	0.744	8.308	12.4	2.05308	27	0
26	1.2	1.14	1.8525	25.1655	28.5	2.58092	43	0
33	1.2	0.8645	2.5688	20.8468	24.7	2.35603	47	0
31	1.2	0.5664	1.0797	15.8415	17.7	2.39445	58	0
38.6	1	0.282	0.141	8.742	14.1	2.10721	77	0
43	1.3	0.8964	0.4968	9.342	10.8	1.90849	46	0
35	1.7	0.9648	0.4536	5.7024	7.2	2.1271	57	0
33	1.1	0.48	0.16	15.36	16	2.2014	65	0
40.1	2.39	0.276	0.8165	10.396	11.5	2.28103	64	0
30.8	1.1	0.435	0.261	7.569	8.7	2.29447	77	0
62	1.2	1.206	1.0452	17.4669	20.1	1.92942	63	0
31	1.2	1.8321	0.4092	6.9843	9.3	1.83251	78	0
38	1.7	0.4968	0.5724	9.6228	10.8	2.01284	71	0
50	1.9	0.791	0.452	7.797	11.3	1.53148	50	0
41	1.5	1.9788	0.8924	16.0438	19.4	2.06446	55	0
30	1.1	0.5605	0.3705	8.474	9.5	2.30963	58	0
38	1.2	3.801	2.016	14.406	21	2.3075	21	0
47	1.1	0.96	0.96	9.84	12	2.26007	79	0
86	1	0.428	0.7597	9.4053	10.7	2.26482	62	0
47.4	1.6	1.717	0.085	6.6215	8.5	2.37658	64	0
56	2	0.9828	0.4536	9.2988	10.8	2.2014	64	1
28	1.2	2.8014	1.015	15.6716	20.3	2.42651	50	0
41	4	0.264	0.1	0.012	0.4	2.12385	78	0
69	1.8	0.35	0	0.05	0.4	1.04139	19	0
26	1.3	0.4536	0.4914	17.8038	18.9	2.53403	66	0
49.2	3.34	3.104	0.582	12.998	19.4	1.85733	52	1
32	1.2	0.102	0.051	2.499	5.1	0.60206	79	0
29	1.1	1.395	1.395	19.4625	22.5	2.40312	90	0
40	2.3	0.53	0.2915	25.3075	26.5	2.32015	57	0
100	6.27	0.2145	0.041	0.2335	0.5	1.80618	34	0
38	1.4	0.1645	1.0575	22.043	23.5	2.44716	75	0
51	1.5	0.6435	0.7956	10.1088	11.7	2.2878	90	1
27	1.2	1.335	0.7031	6.5682	8.9	2.16137	73	0
61	1.1	0.5215	0.447	13.8421	14.9	2.3075	73	0
57	1.7	0.2921	0.381	11.8872	12.7	1.77085	90	0
94	3	0.262	0.078	0.601	1	1.47712	55	0
39	1.1	0.9438	0.13	1.4664	2.6	1.90309	23	0
38	1.6	0.153	0.918	12.699	15.3	1.20412	73	0
133	14.2	0.155	0.806	14.043	15.5	1.96379	61	0
33	1.2	0.126	0.182	0.574	1.4	1.6902	54	0
42	1.3	0.264	0.132	10.56	13.2	2.03342	47	0
35	1.1	0.1651	0.7366	11.684	12.7	2.29003	80	1
40.5	1.1	0.763	0.545	7.957	10.9	2.57749	88	1
34	1.8	0.9324	0.333	5.9718	7.4	2.29226	63	0
33	1.7	1.6016	0.4368	8.2472	10.4	2.22531	52	0
49.6	1.13	1.9197	2.2515	19.3866	23.7	2.59439	59	0
45.7	2.2	0.4844	0.2076	5.1208	6.92	2.19312	79	1
32	1.46	2.0384	1.7108	32.2504	36.4	2.55751	55	0
31	1	1.0272	0.5992	19.6024	21.4	2.51983	30	0
57	17.1	0.4661	0.7663	6.4701	7.9	1.5682	47	1
29	1.2	0.6862	1.2848	12.4538	14.6	2.60746	56	0
25	1.2	2.7348	0.6837	9.3912	12.9	2.38561	20	0
38.2	1.7	1.5004	1.5125	8.8693	12.1	2.50515	88	0
44	1.3	0.53	0.583	2.067	5.3	2.19033	58	0
42.8	1.43	0.613	0.613	56.396	61.3	2.33846	64	0
38.3	1.52	0.006	0.03	0.032	0.1	1.99564	68	0
44	2.2	1.6482	1.3869	16.4619	20.1	2.17319	55	0
53	10.2	0.3055	0.2795	5.8435	6.5	2.48572	62	0
31.5	1	0.474	0.316	6.162	7.9	1.79934	32	0
33	1.1	1.3392	1.178	9.7836	12.4	2.62014	45	0
40	1.4	1.3224	2.4396	18.8784	22.8	2.23553	74	0
35.4	1.13	0.4267	0.5522	24.1211	25.1	2.42325	79	0
40.7	1.9	2.016	1.152	20.736	28.8	2.40312	64	0
41.4	1.44	1.206	1.206	15.276	20.1	2.53529	86	1
30	1.3	1.4276	1.0664	14.4824	17.2	2.29885	50	0
19.1	1.29	1.29	2.365	16.813	21.5	2.07918	24	0
24.3	1.02	0.256	0.728	6.904	8	2.07918	42	0
57	1.2	0.36	0.4125	6.5775	7.5	1.32222	62	0
55	3.2	0.9877	1.309	9.4724	11.9	2.39794	90	0
31	1.3	1.3926	1.2871	18.3781	21.1	2.38917	72	1
34	1.4	0.494	1.178	16.758	19	2.49415	83	1
45	2.4	0.484	0.484	8.954	12.1	2.18469	66	1
24.9	0.84	1.18	0.708	16.992	23.6	1.30103	53	0
25	1.1	1.9546	2.0557	29.0831	33.7	2.60638	59	0
23.7	1.02	0.658	2.303	26.4516	32.9	2.63246	67	0
49	1.3	0.2806	1.3786	10.4798	12.2	2.32634	74	0
46.2	1.09	0.7378	1.1067	10.0555	11.9	2.25527	49	0
36	1.2	0.368	0.192	0.64	1.6	1.61278	66	1
40.4	1.77	0.4071	0.6903	16.5849	17.7	2.5302	79	0
28	0.8	1.152	0.192	3.072	4.8	2.26482	45	0
33	1.2	0.6912	0.9312	7.7856	9.6	2.03743	71	0
35	1.7	1.968	0.492	9.84	16.4	2.23805	19	1
81	1	1.691	1.1392	14.7562	17.8	2.41664	75	0
34.7	1.18	5.4502	2.3324	15.5414	23.8	2.63649	57	0
36	0.94	0.411	0.685	9.6448	13.7	2.22272	35	0
28	1.3	0.3	0.08	0.44	1	1.41497	57	0
32.8	1.44	0.6006	0.1078	14.6916	15.4	2.24797	85	0
33	1	0.84	1.56	7.08	12	2.23805	82	0
21.5	1.1	2.244	0.187	15.334	18.7	2.4133	78	0
38	1.1	0.148	0.004	0.044	0.2	1	75	0
33.8	3.3	0.572	0.858	12.727	14.3	2.63849	74	1
25.5	1.7	0.668	0.668	28.39	33.4	2.34439	57	1
30.1	1	0.483	0.805	14.812	16.1	1.91381	75	0
40.8	3.9	1.539	0.855	14.535	17.1	2.51455	79	0
38	1.4	0.466	0.699	19.106	23.3	2.25768	56	0
31.3	1.1	0.99	0.66	4.95	6.6	2.35218	58	0
55.9	6.5	0.515	0.618	6.798	10.3	2.35984	72	1
21.2	1.5	0.292	0.146	14.162	14.6	2.10037	73	0
23.4	0.9	3.672	1.728	15.984	21.6	2.24304	46	0
69.2	1.5	0.672	0.384	8.448	9.6	2.25042	68	1
25.5	1	0.297	0.297	9.306	9.9	2.09691	48	0
89.2	2.8	0.74	0.592	13.024	14.8	2.08636	66	0
32.4	1.2	1.056	0.704	15.84	17.6	2.27416	90	0
63.6	2.3	0.747	0.249	1.577	8.3	1	50	1
32.9	1.5	3.7	1.48	31.82	37	2.42975	47	0
30.5	1.1	0.912	0.288	2.736	4.8	2.03743	84	0
98.9	2.3	0.9	0.36	7.65	9	1.79239	66	0
54	1.4	0.19	0.76	10.45	19	1.80618	54	1
31.4	1.2	1.434	1.434	21.032	23.9	1.95424	59	1
44	1.2	1.105	1.768	19.006	22.1	2.549	54	0
23	1.2	6.745	1.065	23.075	35.5	2.43616	56	0
27.1	1.1	2.124	2.478	30.798	35.4	2.30535	66	0
27.8	1.7	0.426	0.142	13.348	14.2	2.23553	66	0
25.7	1.1	1.616	1.212	7.171	10.1	2.15229	89	0
32.3	1.2	0.181	0.543	16.29	18.1	2.45788	84	0
40.8	1.2	1.326	0.312	5.928	7.8	2.29226	63	0
31	1.5	1.204	0.688	14.104	17.2	2.33646	64	0
31	1	0.51	1.7	14.79	17	2.53529	42	0
35.5	1.3	0.9	0.8	3.25	5	1.66276	49	1
33	1.5	0.155	0.155	13.795	15.5	2.25527	57	1
31.9	1.3	0.87	1.131	6.612	8.7	2.08991	63	0
44.6	1.3	2.453	1.338	18.286	22.3	2.74115	44	0
31.7	1.2	0.294	0.098	4.459	4.9	2.29226	64	0
51.6	1.3	2.11	3.587	14.77	21.1	2.20952	63	0
49.7	1.7	0.305	0.305	5.307	6.1	1.76343	77	0
34.3	1.2	2.289	0.327	7.521	10.9	1.75587	26	0
44.1	1	0.64	0.384	11.648	12.8	2.39967	50	0
33.2	1.3	1.048	1.048	24.104	26.2	1.9345	76	0
29.9	1.2	0.516	0.602	7.482	8.6	2.15229	77	0
38.2	1.4	0.756	1.134	10.584	12.6	2.31597	80	0
34.7	1.1	0.188	0.564	18.048	18.8	1.6721	66	0
31.7	1	0.473	0.344	3.44	4.3	2.26007	53	0
33.5	1.1	2.212	3.16	26.228	31.6	2.38561	55	0
53.3	4.8	1.664	1.352	7.384	10.4	2.32634	83	0
46	1.6	0.615	0.246	11.439	12.3	1.47712	59	0
26.1	1	0.432	0.384	3.84	4.8	1.99123	73	0
43.7	10.7	1.251	1.251	11.398	13.9	2.06446	57	0
35.8	1.3	1.075	0.86	15.91	21.5	1.94448	59	0
30.4	1	0.726	0.484	22.99	24.2	2.32838	71	1
28.2	1.1	2.3	1.495	7.36	11.5	2.18469	79	0
47.3	4	1.276	0.696	3.364	5.8	1.93952	58	0
35.5	1	1.02	1.224	17.544	20.4	2.0086	39	0
30.3	1.8	2.093	0.805	3.059	16.1	2.37475	69	0
53	8.6	1.54	0.077	6.083	7.7	2.33244	77	0
22.1	1.1	1.452	1.452	21.296	24.2	2.33244	71	0
74.2	2.2	0.84	1.12	24.92	28	1.75587	87	0
36.1	1.4	1.08	0.36	5.688	7.2	2.03342	83	0
28.7	1.2	0.603	0.268	5.695	6.7	1.87506	58	1
25.4	1.2	0.791	0.678	9.831	11.3	1.99123	70	0
33.1	1.2	2.067	1.113	12.402	15.9	2.40312	74	0
27.7	1.3	0.781	0.781	5.467	7.1	2.18752	65	0
30.2	1.2	0.29	0.232	5.22	5.8	2.00432	63	0
65.1	1.1	0.486	0.27	0.135	0.9	2.0086	34	1
47.1	2.5	0.306	0.459	4.335	5.1	1.93952	77	0
68.8	7.7	1.593	2.301	13.275	17.7	2.28103	76	0
33.5	1.2	0.88	0.288	0.032	1.6	1.90849	39	0
27.6	1	0.555	0.777	9.657	11.1	2.39967	78	0
39.3	1.1	0.333	0.296	3.071	3.7	1.97772	42	0
49.8	1.8	0.56	0.84	21.56	28	2.01284	63	0
39.1	5.4	1.736	0.496	21.824	24.8	2.03743	53	1
32.4	9.6	1.048	0.655	11.266	13.1	1.98227	71	0
28.5	1.2	1.956	0.652	13.529	16.3	2.20952	45	0
33.9	1.4	0.25	0.375	12.25	12.5	2.03342	72	0
31	1	0.804	0.938	10.988	13.4	1.81954	42	0
47.1	1.4	0.42	0.7	11.34	14	2.61384	74	0
32.7	1	1.216	1.216	12.464	15.2	2.47712	76	0
53.4	1.5	0.649	0.295	5.192	5.9	1.83885	67	1
79.7	1.5	1.285	0.771	23.387	25.7	2.47276	72	1
30.1	1.9	1.524	0.762	10.033	12.7	2.29226	62	1
30.1	1.2	6.44	0.368	10.672	18.4	2.37291	75	0
27	1.2	0.392	0.224	5.04	5.6	2.28556	37	0
25.8	1.1	0.945	0.63	8.4	10.5	1.69897	42	0
58.4	1	1.002	1.002	14.529	16.7	2.65514	76	0
76.5	1.2	0.756	1.134	10.584	12.6	2.16732	75	0
33.4	1.2	1.254	0.38	1.976	3.8	2.47567	39	0
48.3	2.6	2.568	1.712	16.478	21.4	1.86923	47	0
24.8	1	0.186	0.372	8.742	9.3	1.68124	67	0
30.5	1.1	1.236	0.412	8.24	10.3	2.04532	62	0
32.4	1	4.389	0.266	8.645	13.3	2.1038	51	0
90.2	1.8	0.589	0.124	2.387	3.1	1.82607	70	0
26.6	1	1.13	0.904	9.266	11.3	2.53656	73	1
45.8	2.2	2.32	1.972	6.728	11.6	1.39794	35	0
32.3	1.5	1.28	0.32	14.4	16	2.55145	63	0
48.4	1.6	0.51	1.36	14.28	17	2.70329	77	0
25.2	1.1	1.955	1.035	8.51	11.5	1.14613	33	0
32.5	2.3	0.238	1.666	19.278	23.8	2.11059	65	0
29.6	1.3	0.994	1.846	11.218	14.2	2.1038	75	0
28.9	1	1.001	1.287	12.012	14.3	2.54777	77	1
22.3	8.5	0.286	0.286	13.442	14.3	2.19312	84	0
30.8	1.2	0.492	0.369	11.439	12.3	2.27416	74	0
26.9	1.1	0.567	0.504	5.166	6.3	2.29885	63	1
23.7	1	0.411	0.548	12.741	13.7	2.34242	66	0
24.7	1.2	0.935	0.595	6.715	8.5	2.52763	83	0
30.4	1.3	0.257	2.313	20.817	25.7	2.28103	73	0
27.6	1.1	3.125	0.625	8.75	12.5	2.43933	73	0
25.2	1.1	0.375	0.225	6.9	7.5	2.31806	63	0
25.2	1.2	2.538	1.41	10.011	14.1	1.83885	64	0
32.2	1.4	0.54	0.36	8.01	9	2.46835	64	1
40.1	1.1	0.9	0.6	24	30	2.47129	63	0
23.1	1.1	4.326	1.03	14.626	20.6	2.4843	59	0
35.5	1.1	2.7	0.6	20.1	30	2.18752	45	0
33.1	1.1	1.308	0.763	8.829	10.9	2.5302	45	0
21.1	1.2	4.692	1.656	14.076	27.6	2.55145	55	0
38.1	1.2	1.165	0.466	21.436	23.3	2.48996	80	0
37	4.7	1.781	0.822	10.96	13.7	2.34439	33	0
42.1	4.8	0.264	0.33	5.28	6.6	2.09691	55	1
37.2	1.2	0.144	0.108	3.348	3.6	2.32428	90	1
40.8	1.8	0.11	0.033	0.11	1.1	1.68124	55	0
26.3	1	1.516	5.306	28.425	37.9	2.5092	59	0
33.2	1.4	0.534	0.89	15.308	17.8	2.2878	63	1
38.9	1.3	1.953	0.147	0.126	2.1	2.29447	52	0
29.1	1.4	1.116	1.116	16.368	18.6	1.07918	60	0
31.5	1.1	2.151	1.912	19.598	23.9	2.44716	84	0
30	1	1.378	1.272	7.95	10.6	2.51322	90	0
25.3	1.2	2.29	0.687	19.923	22.9	2.76118	72	1
27.9	1.1	1.68	0.48	21.84	24	2.22272	53	0
34.3	1.6	0.7	0.525	14.7	17.5	2.18469	83	1
35.2	1.4	0.474	0.474	22.752	23.7	1.96848	60	0
38.7	1.1	1.368	0.342	15.219	17.1	2.26717	53	0
40.3	1.1	0.47	0.188	7.614	9.4	1.91908	43	0
27.1	1	1.617	0.343	2.94	4.9	2.54777	59	0
46.2	1.3	0.62	0.62	11.16	12.4	1.94448	63	0
38.5	2.1	0.61	0.915	25.62	30.5	2.08991	73	1
26.5	1.3	0.308	2.618	12.474	15.4	2.15229	81	1
28.5	1.1	0.156	0.312	4.732	5.2	2.33041	53	0
22.4	1	1.62	1.485	10.125	13.5	2.13988	86	0
37.3	1.1	0.889	0.635	11.176	12.7	2.72754	78	0
49.7	3.2	2.36	1.475	25.665	29.5	2.54531	34	1
25	1.3	2.008	1.255	16.315	25.1	2.69897	27	0
27.2	1.1	0.864	0.288	13.248	14.4	2.41996	54	0
54	2.5	3.888	0.729	17.496	24.3	1.97313	26	1
45	1.4	1.674	0.279	7.347	9.3	2.38382	81	0
41	1.8	3.045	1.74	9.57	14.5	2.09691	56	0
26.6	1.2	1.106	0.711	6.004	7.9	2.22789	77	0
34.3	1.2	0.496	0.496	10.416	12.4	2.47129	87	0
38.6	1.4	0.105	0.056	0.525	0.7	2.0569	71	1
29.2	1	6.5784	0.8223	17.5424	27.41	2.54033	51	0
38.8	1.2	0.2114	0.2114	8.456	10.57	2.02938	81	1
38.1	1.5	0.0006	0.0018	0.0164	0.02	1.5682	64	0
32.6	1.5	1.281	0.732	16.287	18.3	2.36549	84	0
31.4	1.4	0.738	0.738	23.124	24.6	1.92428	84	0
56.9	1.4	0.889	0.762	10.541	12.7	2.27416	80	0
38.2	1.2	1.085	0.21	2.065	3.5	2.17026	53	0
32.8	1.4	2.607	1.422	19.671	23.7	2.32015	73	0
54.1	4.1	0.56	1.456	8.96	11.2	2.36922	52	0
27.5	1.1	1.216	1.368	12.616	15.2	2.20952	59	0
44.8	1.2	1.044	2.175	5.046	8.7	2.27416	82	0
38.5	1.3	0.744	0.651	6.882	9.3	2.09691	75	0
39.6	1.2	0.324	0.432	10.152	10.8	2.03743	90	0
54.6	3.3	1.194	1.393	17.114	19.9	2.09691	49	1
52.7	2.4	0.984	0.246	2.747	4.1	2.4014	26	1
32.1	1.5	1.148	2.132	10.988	16.4	2.15534	77	0
33.4	1.4	0.582	1.067	8.051	9.7	2.34635	85	0
25.4	1.3	1.125	0.405	2.88	4.5	2.38021	78	0
33.7	1.1	1.52	0.76	15.77	19	2.41162	34	0
40.5	1.9	2.058	2.401	26.411	34.3	2.58771	82	1
37.5	1.7	3.0906	1.2019	12.8775	17.17	2.51455	63	0
56.5	3.6	0.322	1.127	13.363	16.1	2.04139	58	0
53	1.1	0.572	1.456	3.068	5.2	2.15534	65	0
34.1	1.2	0.442	0.884	19.89	22.1	1.85733	90	0
47.1	1.8	0.108	0.063	0.306	0.9	2.12385	90	1
26.9	1.2	0	0.88	9.02	11	1.51851	73	0
45.1	2.1	2.212	1.896	26.86	31.6	2.37475	90	0
33.8	1.4	0.4692	0.8211	9.2667	11.73	2.25527	52	1
29.8	1.1	0.291	0.388	8.924	9.7	2.23805	60	1
30	1	2.941	2.422	11.245	17.3	2.47276	75	0
29.1	1.2	1.8	1.2	9	12	2	70	0
58	1.9	1.859	2.002	10.01	14.3	2.35603	72	0
38.7	1.5	1.542	1.028	43.69	51.4	2.45025	82	0
36.6	1.5	1.44	1.152	26.208	28.8	2.32428	59	0
32.5	1.3	0.375	0.375	10.625	12.5	2.30963	87	1
31.5	1.2	1.146	0.573	17.381	19.1	2.95036	70	0
76.5	6.2	0.869	0.474	6.32	7.9	2.07918	85	0
28.5	1.3	1.62	0.18	14.04	18	2.11727	84	1
27.6	1.6	2.052	2.28	18.468	22.8	2.13672	54	0
31.9	1.1	0.33	0.33	10.23	16.5	2.14301	27	0
32	1	1.014	0.546	5.226	7.8	2.03342	70	0
39.5	1.4	3.159	1.17	7.254	11.7	2.38021	68	0
34.4	1.3	1.177	2.247	7.276	10.7	2.38561	76	0
47.5	1.4	0.075	0.008	0.017	0.1	1.94939	78	0
78.3	2	0.484	0.363	10.527	12.1	1.99564	79	0
34.3	1.4	0.992	0.62	10.788	12.4	1.57978	80	1
42.4	1.7	0.375	0.875	11.125	12.5	2.20412	79	1
29.3	1.2	0.306	0.561	4.029	5.1	1.88081	79	0
30.5	1.2	2.125	0.75	9.125	12.5	2.5955	83	0
36.6	1.8	6.2342	13.359	67.6856	89.06	1.94939	84	0
42.2	1.3	1.125	0.5	10.75	12.5	2.31597	90	0
41.3	1.3	0.198	0.088	1.804	2.2	2.17319	61	0
30	1.3	0.984	0.984	14.268	16.4	2.08279	64	0
26.5	1.5	0.2079	0	5.0589	6.93	1.60206	35	1
35.2	1.8	0.771	0.771	9.252	12.85	1.81291	45	0
40.2	1.4	1.343	0.632	5.846	7.9	2.38561	82	0
42.2	2.1	1.276	0.22	1.76	4.4	1.97772	75	0
26.2	1.4	0.35	1.4	32.55	35	2.63347	87	1
27.7	1.3	0.476	0.952	10.472	11.9	1.95424	85	0
30.5	1.1	1.68	1.176	13.944	16.8	2.50243	41	0
40.2	1.8	1.885	0.29	11.745	14.5	1.79934	54	1
35.3	1.5	0.972	0.972	13.932	16.2	2.2833	26	0
34.6	1	5.508	1.071	7.65	15.3	2.17026	69	0
33.6	1.3	0.965	1.158	17.177	19.3	2.38561	74	0
22.5	1	0.129	0.258	10.836	12.9	1.95424	67	0
41	1.4	0.357	0.153	4.539	5.1	2.26007	87	0
29.4	1.4	3.4801	2.1416	20.3452	26.77	2.48714	74	1
38.5	1.2	0.96	0.24	8.04	12	2.12385	52	0
50.4	1.4	0.1	0.188	0.1	0.4	1.85733	19	1
24.6	1.1	1.44	0.36	7.2	9	2.0607	78	0
37.3	1.8	4.536	3.78	43.848	75.6	2.35793	73	1
32.3	0.9	0.3174	0.3703	3.9675	5.29	1.87506	86	1
29.3	1.3	1.28	2.048	6.528	12.8	1.51851	66	0
41.2	1.4	1.155	1.155	14.025	16.5	2.45637	90	0
29.7	1.2	0.63	0.49	5.95	7	2.41162	34	0
130.9	10.1	0.648	0.504	5.976	7.2	2.31806	90	1
30.2	1.1	0.918	0.918	13.464	15.3	2.35218	52	0
39	1.6	0.875	0.75	10.875	12.5	1.99123	83	1
43.7	1.4	0.694	1.388	27.76	34.7	2.08636	82	0
104.1	1.4	1.9256	1.4442	8.9059	24.07	2.06819	74	0
50.5	2	0.948	0.474	14.062	15.8	1.14613	35	0
31.9	1.3	0.425	0.255	7.82	8.5	1.91381	65	0
49.7	7.6	141.753	9.9476	57.1987	248.69	1.86332	80	0
41.4	1.6	0.45	0.54	8.01	9	2.26717	87	0
40.1	1.2	0.243	0.243	20.898	24.3	1.32222	86	0
38.8	1.3	2.639	2.03	15.225	20.3	2.17319	87	0
32.6	1.8	1.494	0.2988	27.7884	29.88	2.13033	90	1
33.7	1.8	1.434	0.956	21.51	23.9	1.96379	32	0
28.9	1.5	1.449	3.864	42.987	48.3	2.5563	44	1
46.5	1.6	0.225	0.33	0.945	1.5	2.29447	45	0
35.6	1.3	1.488	0.48	2.736	4.8	2.31597	41	0
51	1.4	1.81	0.543	15.566	18.1	2.37107	67	0
36.5	1.1	0.345	0.23	9.2	11.5	2.12385	74	1
46	2.3	1.4014	0.2548	3.5672	12.74	2.08636	77	1
31	1.2	0.98	1.47	16.66	24.5	1.99564	90	1
43	1.4	0.11	0.154	1.342	2.2	2.34242	76	1
42.4	1.8	2.85	1.8	9.45	15	2.09342	82	0
53.5	2.4	0.537	0.716	16.647	17.9	2.47857	90	0
33.5	1.2	0.69	0.23	2.99	4.6	2.13988	40	0
32.6	1.1	0.902	1.1275	19.844	22.55	1.94939	90	0
64.3	2.3	1.768	1.768	7.344	13.6	1.5563	63	0
51	2.9	0.664	0.996	14.94	16.6	2.10037	80	1
33.9	1.2	1.2	0.6	9.84	12	1.96379	69	0
35.9	1.3	0.289	0.867	27.744	28.9	2.35025	84	0
40	1.4	1.216	2.128	23.408	30.4	1.86332	71	0
140.2	1.3	1.788	1.192	52.448	59.6	2.60638	82	0
39.8	1.5	0.74	1.295	16.465	18.5	1.83885	78	0
36.4	1.7	2.575	1.03	6.695	10.3	2.60746	55	0
33.5	1.3	0.459	0.027	2.187	2.7	2.33445	65	0
25.7	1.1	0.408	0.204	6.188	6.8	2.5092	56	0
44.2	1.5	0.508	0.254	11.557	12.7	2.02938	39	0
30.7	1.2	0.62	1.488	10.044	12.4	2.53275	48	0
45	1.5	0.7	1.68	11.48	14	2.43775	80	0
47.6	1.2	1.032	2.064	9.417	12.9	2.1038	78	0
41.6	1.1	2.604	0.496	9.052	12.4	2.26007	84	0
28.6	1.1	2.839	1.67	12.191	16.7	2.58433	68	0
31.9	1.2	0.102	0.306	9.486	10.2	1.90849	81	0
33.2	1.1	2.509	1.0036	42.1512	50.18	2.51455	77	0
63	0.9	1.505	0.602	27.993	30.1	2.11059	82	0
33	1.4	1.712	1.07	15.622	21.4	2.25527	53	0
34.1	1.4	0.924	0.308	21.252	30.8	1.34242	89	0
31.5	1.5	4.462	0.776	13.386	19.4	2.17898	76	0
49.1	1.6	1.24	1.86	9.176	12.4	2.6721	76	0
43.9	1.6	0.456	0.456	13.984	15.2	2.07918	87	0
28.7	1.4	0.073	0.219	6.497	7.3	2.35793	89	0
25.2	1	0.378	0.378	5.607	6.3	2.14922	71	1
42.2	1.6	1.8	1.575	15.3	22.5	2.06819	76	0
36.6	1.6	2.67	0.534	14.596	17.8	2.18752	62	0
35.4	1.3	0.528	0.528	7.392	8.8	2.38739	77	0
29.2	1.3	0.848	0.53	2.544	5.3	2.03743	48	0
31.5	1.2	1.71	0.665	6.745	9.5	2.14922	62	0
37.6	1.2	0.672	0.192	8.544	9.6	1.99564	87	0
34	1.4	0.5026	0.7539	15.8319	25.13	2.233	58	0
26.8	1.1	0.405	0.405	4.536	8.1	2.33244	78	0
47.7	3.4	0.885	2.124	14.691	17.7	2.13988	90	0
46.2	1.3	0.436	0.654	20.274	21.8	2.35603	87	1
48.4	2.5	0.218	1.09	2.834	10.9	1.62325	70	1
46.5	1.3	0.224	1.344	18.592	22.4	2.60959	55	0
38.7	1.9	3.318	1.738	10.428	15.8	1.96848	57	0
40.2	1.3	0.792	1.32	24.288	26.4	2.37291	52	0
48.7	1.2	1.325	0.265	23.85	26.5	2	59	0
51.4	1.3	1.464	0.854	3.538	6.1	2.00432	48	0
35.4	1.6	0.786	0.786	11.528	13.1	2.38917	84	0
48.1	1	1.764	0.588	1.96	4.9	1.88081	57	0
28.6	1	0.488	0.671	4.697	6.1	2.36361	78	0
40.5	1.5	1.856	1.392	42.688	46.4	2.06819	63	0
59.7	4.7	4.4538	0.6852	10.4493	17.13	2.27184	41	0
31.9	1.1	1.507	1.781	10.138	13.7	2.37658	82	0
28.6	1.4	0.6372	0.4779	13.2219	15.93	2.38917	60	0
39.6	1.4	0.966	0.644	30.268	32.2	2.27184	90	0
36.3	1.1	0.736	1.288	16.376	18.4	2.1959	70	0
50.6	1.3	0.8109	0.8109	6.5773	9.01	2.43136	65	1
43	2.1	0.513	0.513	4.674	5.7	2.41996	71	0
30.5	1	1.65	0.65	2.35	5	2.26482	63	0
42.8	1.3	1.968	2.952	11.48	16.4	1.80618	31	0
33.5	1.5	1.356	1.13	15.594	22.6	2.33646	72	0
75.8	2.3	1.302	1.86	12.462	18.6	2.54158	72	0
26.4	1.3	1.629	0.905	15.566	18.1	2.65801	51	0
38.3	1.7	2.1	0.15	1.8	7.5	1.95904	78	1
39.4	1.6	0.0033	0.0021	0.0069	0.03	1.60206	46	0
29.1	1.7	0.516	1.204	15.308	17.2	2.47129	80	0
48.1	2	0.869	1.185	5.609	7.9	2.08991	61	0
47	1.5	1.22	0.976	9.76	12.2	2.56585	58	0
40.1	1.2	1.04	1.04	10.66	13	2.41162	66	0
41.2	8.8	0.142	0.142	6.461	7.1	2.44248	66	1
39.8	1.5	0.574	0.246	6.56	8.2	1.91381	25	0
45.2	1.6	1.296	1.152	11.808	14.4	2.27416	53	0
25.1	1.4	0.432	1.296	12.528	14.4	2.17026	87	0
30.6	1.2	0.475	0.38	8.645	9.5	2.33445	53	0
30.9	1.8	1.3846	1.7802	14.4394	19.78	2.1271	58	0
29	1	1.37	0.685	3.699	6.85	1.88649	55	0
37.9	1.8	0.708	0.708	15.753	17.7	2.30963	56	0
40.5	1.2	1.144	2.288	53.768	57.2	1.4624	40	0
38.8	2.5	1.4496	1.4496	38.1728	48.32	2.5563	81	0
45.9	1.1	0.735	0.196	3.969	4.9	2.24055	53	0
45.1	3.3	1.444	1.444	16.967	36.1	2.30535	77	0
39.8	1.4	0.624	0.429	2.145	3.9	1.81954	71	0
39.7	1.3	1.404	0.702	19.89	23.4	2.4456	87	0
33.7	1.1	0.688	0.344	16.168	17.2	2.29226	84	0
38	1.4	0.896	0.64	10.624	12.8	2.29226	80	1
35.8	1.5	0.638	0.58	4.35	5.8	2.16435	87	0
41	2.8	0.7254	0.0806	4.433	8.06	2.25285	90	1
54	1.5	0.936	1.56	20.592	31.2	2.47129	85	0
43.9	1.1	0.629	0.333	2.738	3.7	2.03342	56	1
31.8	1.3	1.188	0.648	8.964	10.8	2.06446	88	0
32.3	1.4	0.0864	0.1152	2.3904	2.88	2.25042	88	0
39.8	1.6	0.985	0.197	18.518	19.7	1.96848	80	0
33.2	1.3	2.616	1.308	28.122	32.7	2.52375	46	0
45.6	1.9	0.492	0.082	3.198	4.1	2.17609	65	0
41.9	1.2	0.15	0.15	12	15	2.09691	74	0
58.3	1.7	1.49	1.043	12.218	14.9	2.40654	68	0
30.7	1.5	1.5932	1.9915	30.6691	39.83	1.96848	90	0
44	2	0.513	0.513	16.074	17.1	2.11059	59	0
45.6	1.6	0.416	0.26	4.524	5.2	1.88081	89	0
41.9	1.3	0.328	0.492	15.58	16.4	2.27646	75	1
37.7	1.8	0.585	0.585	3.15	4.5	1.89763	72	0
31	1.1	2.492	0.89	13.884	17.8	2.35984	56	0
31.4	1.4	1.026	0.684	7.866	17.1	2.50786	88	1
37.6	1.2	0.644	0.092	7.82	9.2	1.96848	80	0
32.6	1.2	0.819	0.819	10.062	11.7	2.14301	79	0
33.1	1.6	1.9	0.456	4.332	7.6	2.22531	30	0
31.9	1.1	0.27	0.27	3.96	4.5	2.33041	44	0
32.7	1.8	1.539	0.855	14.193	17.1	2.10037	82	0
49.2	1.6	0.945	1.26	8.19	10.5	2.35793	53	0
37.4	2.1	0.297	0.198	8.613	9.9	1.88649	87	1
45.9	1.6	1.516	2.0845	12.886	18.95	2.45025	84	0
46.6	1.9	0.282	0.705	13.113	14.1	2.1959	82	0
36.5	1.9	1.596	0.266	10.374	13.3	2.11394	82	0
30.9	1.2	1.441	1.048	10.349	13.1	2.31175	90	0
63.2	3.9	0.351	0.39	3.081	3.9	1.17609	39	0
36.9	1.5	0.684	1.026	30.438	34.2	2.47857	90	0
47.4	1.7	0.776	0.097	8.73	9.7	2.35793	81	0
30.6	2.5	2.046	0.372	15.624	18.6	2.43136	66	1
45.3	1.1	1.155	0.735	7.35	10.5	2.43775	80	0
61.5	1.2	1.155	0.154	6.083	7.7	2.29447	71	1
42.4	2.1	0.252	0.021	1.806	2.1	1.49136	70	0
29.7	1	1.785	1.785	46.41	59.5	2.31387	67	0
64.4	2.2	2.601	0	12.24	15.3	1.89763	53	0
50.7	1.1	2.392	1.456	6.032	10.4	2.20952	76	0
40.8	1.3	1.76	0.64	12.96	16	2.32428	69	0
40.1	1.6	1.215	0.243	21.87	24.3	1.95904	90	0
32.5	1.3	1.012	0.759	23.529	25.3	2.05308	75	0
33.2	1.4	0.666	0.444	9.879	11.1	2.08991	89	0
56.8	2.1	0.4824	0.6432	12.7032	16.08	1.74036	85	0
29.2	1.5	1.53	0.918	18.666	30.6	2.33646	58	0
36.2	1.2	0.459	1.071	13.617	15.3	2.29885	88	0
41.2	1.4	0.81	0.405	12.15	13.5	1.75587	71	1
61.9	1.4	0.148	0.037	3.515	3.7	2.17898	84	1
27.8	2	1.128	0.752	16.732	18.8	2.20952	62	0
28.7	1.4	0.726	1.089	31.581	36.3	2.33445	63	0
42.2	1.6	1.04	1.3	23.66	26	2.47567	62	0
39.9	1.1	0.234	0.273	2.145	3.9	2.5966	62	0
31.4	1.4	0.616	0.308	26.18	30.8	2.02531	75	1
103.4	5	0.354	1.593	15.753	17.7	2.73239	78	0
31.5	1.1	0.207	0.299	1.725	2.3	1.77085	73	0
68.1	2.5	1.52	0.57	15.58	19	2.1271	50	0
39.7	1.8	0.013	0.104	0.923	1.3	1.77815	82	0
28.6	1.2	2.737	0.119	9.044	11.9	2.37291	57	0
43.7	2.1	0.426	0.852	18.318	21.3	1.59106	90	1
37.6	1.3	1.391	0.642	8.56	10.7	2.42651	69	0
26.7	1.6	1.345	0.269	20.982	26.9	2.30963	82	0
46.8	1.9	2.618	0.374	33.286	37.4	1.94939	29	0
35.3	1.2	0.464	0.058	5.278	5.8	2.29667	75	0
36.5	1.3	1.188	0.594	16.83	19.8	2.27875	62	0
33.2	1.2	0.861	1.353	9.84	12.3	2.31175	79	1
29.7	1.2	0.976	1.586	9.15	12.2	2.43297	78	1
34.8	1.6	0.4	0.9	8.7	10	2.35025	87	0
42	1.5	0.584	0.511	6.132	7.3	1.93952	64	0
33	1	2.04	0.48	9.36	12	2.43457	63	0
40	1.3	0.582	0.388	8.73	9.7	2.35793	21	0
38	3.4	0.224	0.112	5.6	11.2	2.30103	82	0
40	1.4	0.845	1.69	14.027	16.9	2.76492	75	0
31	1.1	0.136	0.136	3.06	3.4	1.85126	68	0
26	1.2	1.632	0.714	7.752	10.2	2.19866	60	1
50	1.4	0.202	0.202	7.676	10.1	2.29885	52	0
29	1.1	0.846	0.987	11.985	14.1	2.35793	56	0
66	2.1	0.04	0.048	0.664	0.8	1.44716	38	0
39	1.2	2.169	1.928	19.762	24.1	2.37291	54	0
69	1.4	0.49	0.196	8.624	9.8	1.83885	60	0
35	1.3	0.832	0.416	19.344	20.8	2.35218	68	0
34	1.2	1.34	0.804	11.122	13.4	2.40824	79	0
35	1.2	0.756	0.756	9.072	10.8	2.37658	28	0
37	1.2	0.952	0.952	9.996	11.9	1.95904	69	0
68	3.6	1.072	1.34	10.854	13.4	2.25527	55	1
190	3	0.372	0.372	17.856	18.6	2.5966	58	0
45	1.6	1.856	0.812	8.816	11.6	2.36549	84	1
49	2.9	2.379	0.915	14.64	18.3	2.35411	80	0
41.8	6.7	0.968	0.726	9.438	12.1	2.33041	78	0
42	1	2.844	0.474	10.27	15.8	2.12385	61	0
33	1	0.712	0.89	16.02	17.8	2.76193	57	1
47	2.4	0.09	0.06	1.53	3	1.59106	61	0
37	1.3	0.935	1.19	6.12	8.5	2.22011	69	0
39.4	1.5	1.284	1.605	23.754	32.1	2.27416	79	0
36	1.6	0.348	0.232	5.22	5.8	2.01284	74	0
30	1.3	0.235	0.235	14.57	23.5	2.24304	22	0
35	1.8	0.568	0.071	5.609	7.1	2.29226	20	0
45	1.8	1.396	3.141	26.175	34.9	1.38021	82	1
40	1.4	0.432	0	6.552	7.2	2.38202	64	0
31	1.3	0.814	1.628	35.002	40.7	2.35218	60	0
41	2.4	1.992	0.664	27.224	33.2	2.37107	61	1
42	1.4	1.05	0.9	12.75	15	2.46389	83	0
45	2.2	0.242	0.484	11.374	12.1	2.03743	71	1
60	3.8	0.306	0.153	10.404	15.3	1.82607	67	0
35	1.4	1.23	1.599	9.348	12.3	1.93952	51	0
44	1.6	0.098	0.098	6.468	9.8	2.48855	51	0
41	2	0.268	0.67	12.328	13.4	1.95424	67	0
42	3.3	0.355	0.994	5.751	7.1	2.34242	63	0
37	2	0.429	1.573	7.007	14.3	2.25527	55	1
45	1.8	0.915	0.915	22.875	30.5	1.85126	72	1
53	2.3	0.983	4.915	63.895	98.3	2.36922	32	0
50	2.1	1.07	0.428	15.622	21.4	1.77085	77	0
34	1.5	0.888	0.888	27.824	29.6	2.68215	89	0
32	1.2	1.265	0.46	9.66	11.5	2.09342	58	0
36	1.1	1.12	0.96	5.84	8	2.21484	57	0
52	1.5	0.78	0.48	4.56	6	1.79934	87	0
42	1.6	1.45	1.74	10.585	14.5	2.55267	22	0
194	9.4	1.89	1.47	17.22	21	1.80618	70	1
39	2.5	0.768	0.896	11.136	12.8	2.19312	72	0
52	1.9	0.65	0.78	11.44	13	2.4843	59	0
50	2.5	0.312	0.312	7.098	7.8	2.19312	67	0
33	1.4	0.71	0.71	12.638	14.2	2.24055	77	0
45	1.7	1.69	0.169	13.858	16.9	2.05308	69	0
30	1.6	0.378	0.594	4.212	5.4	1.79239	76	0
128	2.8	0.774	1.032	6.45	8.6	2.21484	57	1
38	2.9	1.057	1.359	12.684	15.1	2.0086	86	0
38	1.4	0.324	0.216	10.152	10.8	2.60206	60	1
56	2.8	1.846	0.284	11.928	14.2	2.43457	53	0
32	1.1	1.914	1.044	13.572	17.4	2.50515	55	1
64	4.9	0.837	1.116	25.668	27.9	2.22272	57	0
39	1.7	1.704	0.639	17.04	21.3	2.88818	78	0
43	3	1.474	0.536	11.39	13.4	2.33244	59	0
47	1.6	0.56	0.07	2.765	3.5	1.8451	46	0
27	1.6	0.554	0.554	26.315	27.7	2.4624	74	0
41.1	1.7	2.563	1.398	19.106	23.3	2.59218	64	0
47	1.2	0.436	0.981	9.483	10.9	2.49969	73	0
31	1	2.088	2.784	29.58	34.8	2.44871	31	1
31	1.2	3.28	0.492	4.264	8.2	2.29003	82	0
26	1.4	0.324	0.324	9.882	16.2	2.44404	47	1
36	1.3	1.295	2.035	13.875	18.5	2.83632	39	0
36	1.6	0.655	0.917	11.135	13.1	2.07188	21	0
61	1.2	1.235	0.285	7.98	9.5	1.97313	80	0
31	3.3	0.168	0.056	2.576	2.8	2.20683	57	1
31	1.3	0.715	0.88	3.3	5.5	1.70757	69	1
31	1.2	1.1	1	7.3	10	1.88649	58	0
32	1.6	1.536	0.512	4.16	6.4	1.92942	24	0
30	1.3	0.368	0.414	3.818	4.6	1.77085	56	0
44	1.3	2.844	1.58	9.48	15.8	2.36549	57	1
31	1.3	0.188	0.188	9.024	9.4	2.10037	18	0
40	1.3	1.022	0.438	12.556	14.6	2.38739	82	1
34	1.2	1.194	3.582	32.238	39.8	2.62014	27	0
31	1.8	0.894	1.937	11.92	14.9	2.48572	55	1
44.7	2.3	1.068	0.712	31.328	35.6	2.44404	21	0
41	1.8	0.78	1.56	16.965	19.5	2.21484	61	1
34	1.1	0.336	0.105	1.659	2.1	1.6902	66	0
36.8	1.4	0.996	0.498	15.106	16.6	2.33244	78	0
39	1.6	0.28	0.24	3.44	4	1.74819	60	0
52	2.6	1.05	1.5	12	15	1.50515	54	0
43	2.6	0.162	0.324	14.742	16.2	2.4133	33	1
112	1.1	2.618	1.309	14.586	18.7	2.43775	86	0
48	2.5	0.801	0.267	25.632	26.7	2.54033	76	0
42	1.6	2.706	0.492	7.749	12.3	1.57978	64	1
31	2.4	1.155	1.155	13.53	16.5	2.19033	67	1
28	1.9	0.46	0.69	19.09	23	1.77085	19	1
37	1.3	2.26	0.904	9.266	22.6	2.38202	65	0
38.8	1.3	1.224	0.612	20.502	30.6	1.44716	53	0
24.2	1.2	0.7	0.7	15.925	17.5	2.32634	49	0
31	1.2	0.54	0.648	9.504	10.8	2.40312	60	1
31	1.1	1.52	1.368	12.16	15.2	2.55267	43	0
39	3.1	0.264	0.44	8.008	8.8	2.07918	64	0
36	3.3	1.32	0.792	10.56	13.2	1.92942	79	0
94	3.4	16.11	11.635	32.22	89.5	2.39445	73	1
70	1.7	0.93	1.302	16.182	18.6	2.23805	56	0
31	1.7	1.304	0.652	13.04	16.3	2.35025	67	0
34	1.2	1.176	0.392	34.496	39.2	2.50651	67	0
32	1.7	0.43	0.344	7.74	8.6	2.05308	84	0
46.9	1.6	1.521	0.845	14.196	16.9	1.92428	61	0
76	2.1	2.1	0.63	15.96	21	2.16137	46	0
32	1.4	0.207	1.863	12.42	20.7	2.52244	90	1
36	2.9	1.03	0.824	18.54	20.6	2.13672	64	0
38	2.4	0.889	0.762	10.795	12.7	1.89209	80	0
42	1.4	2.784	1.392	27.492	34.8	2.63043	71	0
34	1.3	0.828	0.759	5.106	6.9	2.17319	86	1
33	1.8	0.032	0.024	0.268	0.4	2.05308	67	0
36.9	1.4	1.11	0.444	5.624	7.4	2.51851	84	0
39	1.2	1.6	1	17.2	20	2.51188	49	0
33.2	1.9	0.362	1.81	33.304	36.2	2.03743	73	0
36	1.4	0.348	0.406	4.93	5.8	2.17609	64	0
39	1.3	1.134	1.89	12.285	18.9	1.85126	57	1
30	1.2	0.687	1.145	20.839	22.9	2.52634	70	1
70	2.2	0.465	0.651	8.184	9.3	2.56348	68	0
35	1.3	1.596	1.064	10.507	13.3	2.81558	50	0
57	1.9	0.47	1.88	25.85	47	2.14922	70	0
44	2.1	1.898	0.438	6.424	14.6	1.88649	79	0
57.5	1.6	2.48	0.744	20.832	24.8	2.05308	84	0
35	1.8	0.174	0.696	15.138	17.4	2.24551	46	0
24	1.5	0.492	0.451	2.542	4.1	2.24055	57	0
42	2.8	0.576	0.36	6.048	7.2	2.18752	78	0
25	1.2	1.485	1.08	10.8	13.5	2.18752	74	0
27	1.1	0.336	0.336	7.644	8.4	2.32015	69	0
40	1.2	0.81	1.134	13.932	16.2	2.4183	62	0
36	1.2	0.865	0.519	15.916	17.3	2.35411	66	0
26	1.2	0.128	0.192	6.016	6.4	2.2014	67	1
29	1.1	0.864	1.056	7.68	9.6	2.4014	80	0
79	2.5	6.063	0.129	3.612	12.9	2.29003	34	1
29	2	1.204	1.204	58.996	60.2	2.35603	57	0
33	1.3	0.256	0.32	2.432	6.4	1.91381	85	1
38	1.1	0.198	0.132	5.94	6.6	2.46538	69	0
30.4	1.4	1.7	1.53	13.43	17	2.56937	52	0
33	1.9	0.138	0.069	0.096	0.3	2.15229	61	0
35	1.2	1	0.6	16.4	20	2.51188	45	0
56	2.3	1.064	0.532	7.581	13.3	1.54407	85	1
32	2.8	0.269	1.345	23.672	26.9	2.42325	70	0
35	3.2	0.704	1.232	15.488	17.6	1.83885	40	0
34	1.9	1.26	1.35	6.3	9	1.85733	45	0
27	1.3	1.278	0.142	12.496	14.2	2.0569	85	0
34	1.3	0.234	0.468	10.881	11.7	2.4456	79	0
64	2.5	0.6	0.6	6.225	7.5	2.13354	64	0
80	1.5	0.432	0.288	10.944	14.4	1.4624	31	0
32	1	0.657	1.752	19.491	21.9	2.54531	60	0
38	2	0.36	0.36	8.28	9	1.97772	63	0
55	3.9	3.848	0.624	5.2	10.4	2.23553	18	0
31	1.2	1.712	0.749	8.239	10.7	2.47422	64	0
38	1.4	5.151	16.968	0.606	30.3	0.90309	27	0
32	1.6	1.68	0.448	8.848	11.2	2.35411	85	0
65	3	0.49	0.42	6.02	7	2.11394	74	1
34	1.6	0.66	0.24	4.98	6	1.81954	63	0
48	1.2	1.298	0.295	4.189	5.9	2.08636	32	0
34	1.4	9.88	0.52	2.47	13	2.29885	61	0
27	1.2	1.28	0.96	13.6	16	2.51587	57	0
83	1.6	0.453	0.151	9.362	15.1	2.20952	69	0
30	1.4	0.552	0.69	5.451	6.9	2.3483	66	1
53	4.1	0.966	1.104	11.73	13.8	2.15229	82	0
35	1.4	0.329	0.329	31.584	32.9	2.5092	72	1
31	1.3	0.64	0.128	6.784	12.8	2.2014	53	1
39	1.3	1.848	0.528	6.336	8.8	1.85126	20	0
42	1.9	0.552	0.828	25.116	27.6	2.32428	57	0
30	1.1	0.212	0.848	20.14	21.2	2.15836	61	0
53	4.1	1.208	0.302	17.214	30.2	1.59106	21	0
29	1.1	0.71	1.278	12.212	14.2	2.24304	56	0
31	1.2	0.256	0.384	5.12	12.8	2.04922	67	0
34	1.1	0.696	0.174	7.83	8.7	2.38021	42	0
29	1.2	0.119	0.049	0.497	0.7	1.69897	53	0
44	1.4	2.7	1.35	18	22.5	2.53656	30	0
21	1.2	0.384	0.672	8.448	9.6	2.24551	73	0
37	1.4	0.204	1.53	6.732	10.2	2.22011	73	0
34	1.3	0.96	0.384	16.512	19.2	2.39794	49	0
33	1.35	0.528	1.056	25.344	26.4	2.63246	78	0
42	1.5	0.84	0.28	12.74	14	2.4624	23	0
32	1.7	0.393	0.524	10.218	13.1	2.19866	60	0
28	1.8	0.426	1.136	12.496	14.2	1.97772	80	1
28	1.1	1.347	1.347	33.226	44.9	2.80889	55	0
34	1.2	0.11	0.22	10.67	11	2.24055	30	0
27	2.1	1.096	3.288	20.824	27.4	2.13354	73	0
39	1.4	0.483	0.276	6.141	6.9	2.52375	85	0
35	1.3	0.316	0.395	7.11	7.9	2.26245	67	0
36	1.8	0.309	1.236	21.012	30.9	1.9345	70	0
24	1.2	0.815	0.978	14.181	16.3	2.27875	65	0
36	1	1.212	1.313	6.565	10.1	2.45484	71	0
42.6	1.4	0.516	2.064	22.446	25.8	2.44871	64	1
39	1.4	0.558	0.372	11.904	18.6	2.35793	74	0
37	1.5	1.24	0.806	4.03	6.2	1.85733	51	0
48	2.8	1.194	0.995	17.512	19.9	2.49831	65	1
40	1.4	1.95	0.39	3.822	7.8	1.95424	64	0
45	1.4	1.1	1.32	19.36	22	2.52763	25	0
28	1.3	1.008	0.504	10.962	12.6	2.23045	65	0
41	1.3	0.267	0.178	8.366	8.9	2.01703	72	0
37	1.7	1.056	4.224	17.424	26.4	2.31175	56	0
36	3.5	2.112	0.528	10.428	13.2	2.39967	71	0
50	3.2	1.408	0.768	8.32	12.8	1.91908	51	1
40	1.2	0.354	0.413	4.602	5.9	1.87506	55	0
34	2.9	1.484	1.272	18.232	21.2	2.45637	73	0
32	1.2	1.48	0.592	10.804	14.8	1.11394	50	0
40	2.4	2.9	0.87	20.88	29	2.78032	62	0
36	1.5	0.804	0.603	18.693	20.1	2.0569	80	0
36	2.2	1.547	1.428	8.687	11.9	2.06446	52	0
31	1.6	0.028	0.028	1.316	1.4	2.08279	27	0
142	1.9	0.745	0.894	13.112	14.9	1.97313	85	0
33	1.1	0.856	1.07	8.667	10.7	2.35603	50	0
62	3.7	2.03	1.16	24.07	29	2.32838	47	0
41	1.4	1.95	1.3	26.325	32.5	2.49693	61	0
45	1.9	0.348	0.087	2.436	2.9	2.01284	73	1
41	1.7	1.134	0.756	34.398	37.8	2.39445	76	0
37	1.2	0.806	0.372	4.96	6.2	2.27646	64	1
25	1.1	1.288	1.472	15.456	18.4	2.40824	74	0
38	2	0.57	0.855	7.41	9.5	1.62325	63	1
35	2.2	0.315	0.252	5.67	6.3	2.23553	67	0
27.6	1.3	3.48	2.9	50.46	58	2.43616	61	0
92	2.5	0.92	0.276	7.912	9.2	2.36361	58	0
38	3.8	1.432	1.253	14.499	17.9	2.56703	64	1
38	10.2	0.306	0.252	1.224	1.8	2.19866	61	0
28	3	1.33	0.42	1.715	3.5	2.20952	71	0
99	2.7	0.104	0.026	0.26	1.3	2.03342	67	1
32	1.1	0.252	0.252	5.607	6.3	1.83885	51	0
59	3.3	1.89	2.646	27.216	37.8	1.85126	53	1
82	2.2	0.948	0.948	13.272	15.8	1.98227	32	0
26	1.4	0.556	0.417	12.788	13.9	2.32428	73	0
33	1.2	0.784	0.672	9.744	11.2	2.32428	69	0
36	1.3	1.375	0.88	3.19	5.5	1.80618	64	0
62	1.2	0.34	0.816	5.644	6.8	2.1959	52	0
32	1.1	0.081	0.108	1.998	2.7	1.72428	62	0
40	1.1	0.024	0.016	0.68	0.8	1.69897	74	0
52	1.5	1.656	2.07	16.353	20.7	2.77379	57	0
26	1	0.815	0.163	15.322	16.3	2.62941	43	0
40	1.3	1.106	0.316	6.399	7.9	2.18469	76	0
30	1.1	0.16	0.16	15.68	16	2.56229	67	0
32	1.1	0.835	0.835	12.859	16.7	2.53403	79	0
30	1.2	2.328	2.328	14.55	19.4	2.22531	75	0
37	1.2	0.434	0.093	2.511	3.1	2.03743	51	0
23	1	0.392	0.98	17.64	19.6	2.58546	63	1
29	6.1	1.379	1.182	16.942	19.7	2.48287	59	0
81	2	0.252	1.008	23.688	25.2	2.14922	76	1
30	1.3	0.555	0.74	17.76	18.5	2.25768	72	1
32	1.4	0.465	0.744	8.091	9.3	1.88649	78	0
50	2.4	0.42	0.21	9.345	10.5	2.44091	65	1
78	3.1	2.268	0.168	5.292	8.4	2.07188	52	1
29	1.8	2.616	3.924	56.898	65.4	2.21748	57	0
47	1.5	1.326	1.326	19.227	22.1	2.08991	70	1
36	1.6	0.966	0.322	14.812	16.1	2.47567	54	0
149	1.3	0.728	0	36.4	36.4	2.25527	64	1
65	1.5	0.852	1.491	18.744	21.3	2.16137	74	0
33	1.2	1.19	0.98	4.76	7	2.52634	74	0
33	1.2	0.837	1.674	24.831	27.9	2.71933	68	1
35	2.6	0.312	0.078	3.471	3.9	1.39794	47	0
28	1.3	0.96	0.96	9.96	12	2.51587	59	0
34	1.2	0.912	0.228	3.933	5.7	2.53908	40	0
26	1.3	0.88	1.056	15.488	17.6	2.233	63	0
34	1	1.023	1.023	31.031	34.1	2.29447	64	0
49	1.8	1.12	0.336	8.736	11.2	2.17026	61	1
59	2	0.138	0.092	4.324	4.6	1.59106	67	1
32	2.4	0.28	0.168	5.04	5.6	1.69897	69	0
35	2	0.528	0.264	5.456	8.8	2.16137	76	0
34	1.3	0.692	1.73	31.486	34.6	2.55145	71	0
34	1.4	1.368	1.881	13.851	17.1	2.32428	77	0
38	1.8	0.99	0.66	29.7	33	1.81291	73	0
34	1.4	0.748	0.374	17.204	18.7	2.45637	74	1
25	1.4	1.85	1.48	14.615	18.5	2.26482	39	0
34	1.4	0.612	0.432	2.52	3.6	2.39094	55	0
38	2.7	0.392	0.392	38.024	39.2	2.08279	77	1
38	1.4	0.398	0.199	16.119	19.9	2.40654	84	0
36	1.2	1.221	0.666	9.102	11.1	2.25527	75	0
37	1.6	0.405	0.45	3.33	4.5	1.53148	58	1
35	1.5	1.32	0.33	7.92	11	2.18184	31	0
53	1.2	1.728	0.432	4.752	7.2	1.85733	50	1
36	1.7	1.468	1.835	33.03	36.7	2.48144	76	0
30	1.3	1.54	0.44	19.8	22	2.45332	74	0
29	1.1	1.918	0.685	10.686	13.7	2.31597	81	0
30	1.3	0.978	0.489	14.833	16.3	2.29226	90	0
49	2	0.268	0.536	11.926	13.4	2.25768	39	0
56	2.6	4.901	0.676	8.619	16.9	1.54407	56	1
35	1.2	1.82	0.65	10.4	13	1.5563	26	0
49	1.3	0.099	0.033	3.135	3.3	2.04532	53	0
88	9.8	0.351	0.273	3.276	3.9	2.43775	63	0
31	1.3	0.375	0.25	11.125	12.5	2.18469	79	0
32	1.2	1.568	2.24	18.368	22.4	2.47276	76	0
26	1.3	1.44	0.16	6.32	8	2.17026	45	0
32	1.5	1.16	1.392	20.416	23.2	1.90849	39	0
36	1.6	5.348	2.292	29.796	38.2	2.35793	43	0
51	4.7	2.448	1.224	35.088	40.8	2.56348	58	0
43.9	1.9	0.741	0.684	3.99	5.7	2.0569	29	0
133	1.7	0.54	0.486	3.888	5.4	2.52114	68	1
33	1.2	0.737	0.603	5.226	6.7	2.4133	90	0
40	1.4	6.936	3.179	16.762	28.9	2.13672	71	0
37	1.8	0.936	0.936	13.572	15.6	2.06819	62	0
43.2	1.4	0.46	0.69	21.85	23	2.27875	58	0
35.4	1.3	1.05	0.525	15.925	17.5	2.33041	29	0
53	1.1	1.65	1.155	13.53	16.5	2.45025	54	0
35	1.5	0.616	0.616	14.014	15.4	2.31175	67	0
42	1.2	1.14	0.912	9.348	11.4	2.38917	77	0
40	3.8	1.404	1.08	8.1	10.8	2.22011	72	0
29.5	1.1	1.134	1.296	5.589	8.1	2.3075	59	0
32	1.4	0.438	0.219	6.643	7.3	2.27875	50	0
36	1.4	3.57	2.618	16.898	23.8	2.51851	47	0
39	1.5	0.6	0.6	4.74	6	2.24797	60	0
41	4.2	0.873	1.164	26.772	29.1	2.54777	72	1
33	1.2	0.294	0.042	1.68	2.1	1.66276	68	1
38	1.1	0.784	1.176	30.184	39.2	2.34635	70	0
86	5.2	0.6	0.45	9.9	15	2.26245	64	1
29	1.1	0.414	0.414	5.865	6.9	2.20412	51	0
25	1.1	0.54	1.35	11.61	13.5	2.1271	70	0
51	2.4	0.494	0.338	1.716	2.6	1.74819	85	0
30	1.2	0.363	0.429	2.508	3.3	2.18469	65	0
40	1.7	0.728	0.546	16.744	18.2	2.49415	68	0
33	1	1.968	1.804	12.464	16.4	2.38561	60	0
28	1.4	1.218	1.392	14.442	17.4	2.47857	65	0
34	1.4	0.384	0.64	11.776	12.8	2.54283	69	1
27	1.2	0.924	1.716	10.428	13.2	2.233	30	0
31	1.2	9.845	0.358	7.518	17.9	1.60206	76	0
38	1.4	1.107	0.615	10.455	12.3	2.46835	75	0
44	1.4	1.008	1.296	11.664	14.4	2.02531	85	0
53	5.6	1.47	0.63	15.54	21	2.7839	79	0
34	1.1	3.66	0.732	7.686	12.2	2.40483	29	0
29	1.6	0.984	0.984	10.086	12.3	2.25768	77	0
37	1.3	1.34	1.608	10.318	13.4	2.39967	87	0
125	2.2	0.49	0.294	3.92	4.9	2.08279	34	0
116	5.4	0.337	2.359	30.667	33.7	1.76343	40	0
58	1.9	0.45	0.1	4.15	5	2.2878	71	0
46	1.7	0.816	0.816	18.564	20.4	2.39094	50	0
28	1.1	1.22	0.488	22.204	24.4	2.71684	63	0
35	1.6	0.28	1.12	24.64	28	2.18752	38	1
31	1.6	0.792	0.352	7.48	8.8	2.29226	87	0
58	1.8	0.48	0.8	12.64	16	1.80618	56	0
38	1.2	1.818	1.212	16.16	20.2	2.75967	55	0
48	2.4	0.48	0.32	2.88	8	1.80618	73	0
44	2	0.702	0.702	10.179	11.7	1.75587	50	1
42	2.4	0.86	0.516	6.364	8.6	2.41162	65	0
27	1.3	2.106	0.81	12.96	16.2	2.74429	47	0
92	1.4	1.508	0.754	24.128	37.7	2.62531	90	0
50	2.5	0.714	1.122	8.262	10.2	2.44716	78	0
32	1.3	2.154	2.872	63.902	71.8	2.32428	69	1
48	2.5	0.426	0.426	20.235	21.3	1.69897	56	1
35	1.1	0.759	0.828	4.83	6.9	2.46687	42	0
30	1	0.445	0.267	8.099	8.9	2.4183	88	1
42	1.3	1.61	1.932	28.658	32.2	2.32222	76	0
52	2.9	0.364	0.224	0.56	2.8	1.76343	60	1
33	2.7	0.36	1.08	15.84	18	2.57978	70	0
35	1.3	0.402	0.402	6.566	13.4	2.19312	85	0
34	3.2	0.726	1.21	22.022	24.2	2.64246	88	0
46	1.8	1.584	0.462	4.29	6.6	2.14922	69	0
38	1.5	0.158	0.474	12.008	15.8	2.33646	65	0
42.6	4	1.1	0.88	8.8	11	2.44716	64	0
42	2.8	0.34	0.255	6.545	8.5	2.1271	55	0
45.9	1.3	0.388	0.97	17.46	19.4	1.94448	77	0
41	1.5	0.216	0.648	4.05	5.4	2.12057	34	0
29.9	1.6	1.007	0.4664	3.7842	5.3	2.35411	78	0
27.9	1.3	1.0138	1.2056	11.3025	13.7	2.54654	41	0
31.3	1	0.525	1.05	8.225	17.5	1.85733	74	1
25.4	1.2	0.4248	0.0288	3.1356	3.6	2.21484	65	0
33	1.5	0.18	0.12	4.98	6	2.35218	68	0
71.8	1.6	0.5543	0.2024	1.5157	2.3	2.17026	58	1
38.4	2	0.7772	0.67	25.2992	26.8	2.17026	62	1
30.7	1.5	1.26	0.756	9.828	12.6	2.50106	70	1
32.1	1.2	0.714	0.714	5.95	23.8	2.33646	50	0
34.7	1.4	1.351	2.895	14.089	19.3	2.68215	56	0
43.4	6.1	0.708	1.4514	9.5934	11.8	2.5611	85	0
42.6	1.4	1.13	2.26	13.56	22.6	1.98677	80	0
40.7	2.1	0.1701	0.3591	18.3519	18.9	2.49969	62	1
82.9	9.6	0.046	0.022	0.028	0.2	1.6721	68	1
52.1	4.3	0.6583	1.2712	20.7251	22.7	2.35984	76	0
31.2	1.2	1.806	1.29	20.64	25.8	2.91803	34	0
32.7	1.3	1.209	1.209	36.27	40.3	2.68931	61	0
43	1.5	0.039	0.02	0.026	0.1	0.954243	66	0
39.6	1.6	0.525	0.42	8.295	10.5	2.08279	49	1
32.1	5.8	0.9399	1.8075	21.2321	24.1	2.37475	67	0
31.3	1.1	0.1806	0.258	8.1098	8.6	2.16137	66	0
23	1.8	1.6	0.32	8.8	16	2.38917	76	0
27.9	1.2	0.154	0.539	5.775	7.7	2.32428	56	0
27.8	1.3	1.0912	1.0044	10.2424	12.4	2.22272	43	0
31.9	1.5	2.4656	1.7956	22.0028	26.8	2.5563	67	0
43.2	2.5	0.432	0.378	1.728	2.7	2.07188	57	1
29.7	1.1	1.725	1.2	11.79	15	2.34044	52	0
42.7	2.1	0.7345	1.2091	9.2999	11.3	1.34242	56	0
31.6	1.3	0.42	0.168	7.98	8.4	2.49136	82	1
30.8	1.2	1.4948	1.3534	17.271	20.2	2.47276	45	1
32.8	1.4	0.441	0.294	12.789	14.7	2.31387	54	0
33.3	1	0.3013	0.786	11.9079	13.1	1.88649	54	0
33.6	1.9	0.3435	0.6412	21.8695	22.9	2.53148	88	0
30.8	1.5	2.072	0.444	11.396	14.8	2.33244	73	0
27.5	1.5	0.053	0.106	4.823	5.3	1.5682	64	0
38	1.6	1.088	0.6052	5.0252	6.8	1.50515	78	1
41.2	3.1	1.116	2.232	32.736	37.2	2.62325	62	1
23.3	1.4	0.107	0.2247	10.0366	10.7	1.96848	58	0
25.9	1.1	0.2873	0.9282	20.8624	22.1	2.23045	73	0
27.3	1.2	0.261	1.4094	23.229	26.1	2.12057	79	0
33	1.3	1.7919	0.8145	15.4031	18.1	2.65801	59	0
32.8	1.2	0.185	0.185	17.945	18.5	2.69636	59	0
166.1	1.9	0.3498	0.477	9.7626	10.6	2.17898	78	1
37.9	1.3	1.235	0.19	7.695	9.5	2.12385	37	0
69.3	3	0.831	0.554	22.714	27.7	2.30103	52	1
42.3	1.6	0.231	0.172	0.54	1	1.59106	63	0
39.1	1.4	3.654	0.522	20.88	26.1	2.04532	83	1
46.8	3.7	0.4216	0.8976	12.2536	13.6	2.04532	76	0
50.1	2	1.8966	0.436	8.4366	10.9	1.57978	59	0
32.3	1.2	1.1186	0.7896	7.4354	9.4	2.34044	76	0
37.7	1.1	1.65	0.44	4.4	11	2.48855	54	0
28.7	1.2	0.4	0.15	3.4	5	2.0607	77	0
30.1	1.5	1.82	0.26	23.66	26	2.5682	73	1
42.8	2.2	0.448	0.896	27.776	44.8	2.29667	84	1
26.6	1.4	0.7085	1.0573	9.1124	10.9	2.04532	53	0
27.9	1.2	0.564	0.408	4.728	6	2.05308	79	0
36.7	1.4	1.3398	2.1112	36.8648	40.6	1.25527	88	1
27.9	1.6	0.4708	0.856	20.009	21.4	2.56937	74	0
44.7	1.4	2.4108	0.7056	11.2749	14.7	2.25042	54	0
45	2.5	0.2958	1.1832	15.834	17.4	2.43457	70	0
30.8	1.2	1.562	0.71	11.36	14.2	2.66276	58	0
29.2	1.8	1.744	1.308	16.35	21.8	2.34439	60	0
27.5	1.4	0.412	0.309	8.858	10.3	1.66276	25	0
39.3	2.6	0.81	1.0395	11.5155	13.5	0.477121	61	1
25.3	1.2	0.576	0.736	6.68	8	1.73239	76	0
29.6	1.3	0.486	0.972	22.113	24.3	2.22789	47	0
29.1	1.6	2.14	15.408	12.412	42.8	2.10721	78	0
36.2	1.1	0.914	2.742	47.528	91.4	2.51322	89	1
32.8	1.2	0.774	0.387	8.514	12.9	2.26007	55	0
72.7	1.6	0.226	0.452	19.21	22.6	2.38202	67	0
25.5	1.1	0.696	1.392	13.572	17.4	2.57054	75	0
32.7	1.1	1.0396	1.1526	8.6671	11.3	2.32428	75	0
39.4	2.9	0.798	0.021	0.504	2.1	1.97772	77	0
32.7	2	0.7125	0.4425	6.2625	7.5	2.44871	85	0
31.7	1.2	0.3888	0.3402	7.371	8.1	2.11059	77	1
22.9	1	0.2813	0.2231	9.1859	9.7	2.00432	59	0
29.7	1.2	1.2296	0.9048	20.8568	23.2	2.54033	56	0
31.8	2.1	1.5394	0.8055	15.2508	17.9	2.59879	54	0
52.7	1.9	5.27	0.93	5.27	31	2.75128	45	1
34.1	1.5	0.8651	1.0761	19.1377	21.1	2.41996	88	0
39	1.2	1.715	0.679	4.396	7	2.54158	41	0
51.1	1.4	0.36	0.9	15.3	18	1.74819	73	0
30.7	1.3	0.364	0.182	17.654	18.2	2.2014	90	1
32.9	1.5	0.385	0.6825	16.415	17.5	2.03342	78	1
22.3	1.1	0.638	1.914	18.821	31.9	1.96379	90	0
39	1.7	0.8848	0.9954	5.767	7.9	2.28103	50	1
26.4	1.3	0.912	0.684	10.344	12	2.45637	69	0
23.7	0.9	1.3475	0.5555	3.476	5.5	2.07918	88	0
32.3	1.1	0.9558	0.8673	15.8415	17.7	2.41162	69	0
39.9	2.2	0.099	0.198	1.947	3.3	1.81291	80	1
39.3	1.4	1.0164	1.6324	12.397	15.4	2.03743	82	0
37.5	1.4	0.9706	1.2871	18.8001	21.1	2.38021	70	1
28.5	1.2	0.291	0.485	7.469	9.7	2.13672	66	0
28.6	1.5	1.071	0.8442	10.6596	12.6	2.08279	81	0
27.1	1.3	0.5568	1.4152	21.2048	23.2	2.50243	75	0
35.2	1	0.372	0.248	2.728	12.4	1.74819	69	1
29.6	1.1	2.3532	0.9435	7.5813	11.1	2.24551	44	0
27.1	1.9	1.34	1.876	5.494	13.4	2.31175	79	0
36.8	2.4	0.336	0.252	1.386	4.2	2.05308	76	1
33.3	1.4	0.126	0.756	9.45	12.6	1.51851	64	0
30.5	1.1	2.6	0.8875	8.25	12.5	2.26951	63	0
28.1	1.1	0.595	1.3475	15.5225	17.5	2.0569	54	0
45	2.5	3.5568	0.513	7.182	11.4	1.9345	33	1
30.5	1.5	0.235	0.16	0.02	0.5	2.19312	65	0
31.2	1.4	0.33	1.65	7.755	16.5	2.42488	60	0
155.2	1.5	0.9375	0.6	5.7825	7.5	2.37291	84	0
25.5	1.2	2.1942	1.3833	11.7342	15.9	2.52504	67	0
31.4	1.4	1.02	0.34	14.79	17	2.21748	77	1
29.2	1.3	1.854	0.9888	7.3748	10.3	2.44716	63	0
73	1.3	0.4214	0.1376	3.7195	4.3	2.20952	85	1
35	1.8	0.1715	0.2205	4.4786	4.9	2.16435	51	0
28	1	0.756	1.1088	6.3756	8.4	2.53656	61	1
40.2	1.1	2.919	0.834	30.858	41.7	2.46538	46	1
35	1.1	0.7612	0.2076	16.2966	17.3	2.32428	52	0
30.3	1	0.7178	0.5624	6.0754	7.4	1.85733	80	0
34.7	1.2	1.036	0.74	5.402	7.4	2.17609	29	0
40.7	2.3	26.98	0.76	4.56	38	1.81291	86	1
40.3	1.4	39.798	1.474	30.217	73.7	2.233	90	0
32.7	1.4	0.8554	1.0556	16.2708	18.2	2.15534	85	0
31.9	1.2	2.3484	0.6798	16.8508	20.6	2.55751	51	0
26.4	1.2	1.12	1.12	19.712	22.4	2.43136	67	0
30.8	1.1	2.346	0.612	6.018	10.2	2.30535	67	0
32	1	1.6459	0.9047	8.0224	10.9	2.53656	63	0
34.1	1	1.6428	0.5661	8.7468	11.1	2.25768	87	1
34.7	1	0.8413	2.7387	14.3021	17.9	2.31597	20	0
47.9	1.9	0.132	0.066	6.138	6.6	1.36173	60	1
40.4	3.2	0.284	0.071	6.532	7.1	1.86923	76	0
27.3	1	0.21	0.21	2.898	4.2	2.38739	70	1
39.3	1.9	0.69	1.56	12.09	15	2.2878	66	0
35	1.1	0.424	1.272	5.088	21.2	2.45939	78	0
61.4	1.5	0.18	0.54	15.66	18	1.98227	49	1
23.5	1.1	0.1834	0.2358	12.5629	13.1	2.1271	68	0
25.7	1.9	1.267	0.724	0.181	18.1	1.49136	58	0
37.5	1	0.4104	0.8892	15.7491	17.1	2.549	73	1
118.1	1.6	0.28	0.672	1.792	5.6	1.99123	59	0
28.8	1.1	0.468	1.053	10.1322	11.7	2.12385	75	0
36.6	2	0.776	0.194	12.222	19.4	2.08991	88	0
27.7	1.2	0.648	0.432	7.128	10.8	2.55145	58	0
30.9	0.9	1.674	0.093	6.975	9.3	2.3784	59	0
31.2	1.1	0.2407	0.7221	7.3289	8.3	2.13672	68	1
31.1	1.6	0.6392	1.034	7.3884	9.4	2.41664	73	0
40.4	1.3	0.0624	0.0832	4.9868	5.2	1.50515	56	0
29.7	1.3	0.7259	0.1666	10.9242	11.9	2.32838	80	0
52.4	1.2	1.6872	1.1172	19.7448	22.8	2.49831	55	0
32.2	1.7	0.152	0.19	1.311	1.9	1.87506	64	0
36.2	1	0.275	0.055	5.115	5.5	2.37107	50	0
59.2	2.2	0.704	0.016	0.624	1.6	1.54407	51	1
35.2	1.2	0.8041	1.683	16.0633	18.7	2.08636	90	0
29.9	1.5	0.7654	0.3471	7.7697	8.9	2.05308	58	0
34.4	1.5	0.19	0.342	18.449	19	2.08991	83	1
28.3	1.2	1.4415	1.643	12.1055	15.5	2.5955	75	0
37.6	3.4	0.956	1.195	19.837	23.9	2.29885	45	1
34.1	2.6	0.4833	1.0382	16.3427	17.9	2.59879	61	1
41	1.5	0.318	0.424	3.286	5.3	2.40993	50	1
35.6	1.5	0.138	0.414	12.972	13.8	1.74819	45	0
33.6	1.1	0.9464	0.6968	3.4164	5.2	2.20952	82	0
44	2.2	1.3005	0.6426	13.2804	15.3	2.03342	35	1
35	2.5	0.9405	0.7866	15.2361	17.1	2.06819	51	0
44	1.1	0.585	0.195	3.835	6.5	2.32015	70	0
29	1.5	0.3876	0.798	21.4092	22.8	2.67394	65	0
100	1.5	0.9088	0.736	4.6528	6.4	2.18752	68	0
24	1.3	1.116	0.072	1.872	3.6	2.15836	44	0
28	1.8	0.3842	0.4407	10.3508	11.3	2.02119	45	0
35	1.7	0.054	0.162	2.646	5.4	1.64345	61	1
39	1.3	0.46	0.02	0.46	2	1.97772	51	0
31	1.2	1.1284	0.7595	17.7289	21.7	2.23805	63	1
36	0.9	0.144	0.24	3.6	4.8	2.24797	52	1
29	1.2	3.2184	1.043	10.43	14.9	2.37475	66	0
42	1.8	0.7748	0.9685	12.4415	14.9	2.40993	54	0
40	1.8	0.076	0.019	0.874	1.9	2.10037	69	0
29	1.2	0.0801	0.2314	8.0367	8.9	2.17898	79	0
32	1.2	1.1009	0.8181	8.1103	10.1	2.1038	80	1
38	2.1	1.96	1.176	13.524	19.6	2.20412	83	0
33	1.8	1.5664	1.8156	31.7552	35.6	2.18184	59	0
32	1.2	0.119	0.238	7.616	11.9	0.954243	85	1
42	2.2	0.3372	0.4777	25.9363	28.1	2.24304	71	0
26	1.3	0.5824	0.2912	4.0432	5.6	1.49136	48	1
27	1.6	1.0089	0.8379	15.1506	17.1	1.86332	46	1
62	2.7	0.2862	0.1802	10.07	10.6	1.89763	59	0
29	1.9	0.3864	0.196	1.4616	5.6	2.21484	85	0
31	1.5	0.104	0.312	7.592	10.4	1.99123	53	0
24	1	1.3065	0.7236	17.9493	20.1	2.32428	71	0
81	2	1.4329	1.5939	12.8961	16.1	2.0569	75	0
52	3.3	2.5584	1.2792	16.6788	24.6	1.75587	70	0
37	1	0.4592	0.6664	4.424	5.6	1.82607	56	0
31	1.2	0.978	0.489	14.507	16.3	2.58206	71	0
28	2.4	0.244	0.244	11.712	12.2	2.40654	69	1
34	1.4	0.1891	0.0305	5.8316	6.1	2.43616	83	0
29	1.1	0.3876	0.1026	8.7438	11.4	1.51851	71	0
30	1.2	1.2627	1.0614	15.8661	18.3	2.29226	90	0
35	2.9	1.007	0.304	8.132	9.5	2.29226	74	0
26	1.3	1.422	3.2785	34.3255	39.5	2.7185	75	0
44	1.6	0.0927	0.0412	7.5499	10.3	2.1038	58	0
34	2.5	0.455	0.52	11.752	13	1.87506	57	0
38	3.1	0.528	0.814	0.572	2.2	1.14613	83	1
30	2.6	0.8965	1.4507	13.8713	16.3	1.50515	73	1
40	2.3	0.152	0.044	0.048	0.2	1.04139	56	1
29	1.2	0.8924	0.5044	37.1316	38.8	2.75815	33	0
36	1.5	1.222	1.222	31.772	61.1	2.44404	54	1
28	1.5	1.782	1.9305	44.9955	49.5	2.57864	34	0
36	1.2	0.9263	0.6123	14.0044	15.7	2.18469	61	0
48	1.8	0.527	0.155	2.294	3.1	2.23553	69	0
31	1.7	0.576	0.18	1.62	3.6	1.72428	66	1
37	1.7	0.9065	1.2765	16.169	18.5	2.38917	68	0
67	1.7	0.9064	1.2978	7.5911	10.3	2.40654	52	0
27	1.3	0.171	1.026	15.732	17.1	2.32634	80	0
32	1.2	1.638	0.546	11.83	18.2	2.06819	66	0
41	2.5	0.064	0.16	2.528	3.2	1.41497	55	1
31	1.2	0.852	0.426	5.7084	7.1	2.29667	46	0
77	1.6	0.478	0.956	22.2509	23.9	2.07555	71	1
29	1.4	1.6128	0.0162	0.0162	1.8	1.07918	63	0
29	0.9	1.0602	0.5022	7.6074	9.3	2.18469	55	0
33	1.4	1.339	0.412	8.549	10.3	2	68	0
31	1	0.0348	0.0732	0.0453	0.3	1.20412	44	0
29	1.1	0.5371	0.5945	2.87	4.1	1.91908	76	0
28	1.1	0.4654	0.7697	12.5658	17.9	1.72428	47	0
28	1.2	0.7303	0.6867	9.374	10.9	2.6464	56	0
40	1.5	2.821	0.7826	13.9594	18.2	2.24797	56	0
38	1.8	1.4022	1.1316	21.525	24.6	2.27184	80	1
29	1	1.0074	0.7866	11.937	13.8	2.3075	83	0
23	1.2	0.35	0.19	9.43	10	2.1271	64	1
27	1.6	1.3317	0.9843	16.8682	19.3	2.62941	50	0
27	1.6	0.7035	0.0469	5.963	6.7	1.74036	43	0
32	2.5	0.378	0.081	1.809	2.7	2.09691	60	0
24.8	1.32	0.4752	0.648	6.0264	7.2	1.83251	55	1
25.8	1.21	1.1005	0.899	13.392	15.5	2.53275	79	0
28.8	1.15	2.7477	0.5289	9.4557	12.9	2.57403	32	0
29	1.46	2.765	2.065	12.2325	17.5	2.15229	42	0
26.6	1.12	0.8695	1.9975	20.5625	23.5	2.14301	81	0
24.3	1.13	0.576	0.192	2.368	3.2	1.70757	84	0
51	2.82	0.5405	1.41	21.479	23.5	2.42488	83	1
32.2	1.62	1.144	1.716	25.168	28.6	2.53656	81	0
35.5	1.08	0.448	0.64	5.12	6.4	2.64542	50	0
31.2	1.28	2.0516	1.242	5.5016	9.2	2.66652	66	0
155.2	1.72	0.636	0.53	9.328	10.6	2.50106	72	0
29.8	1.61	0.988	0.741	22.23	24.7	2.26717	31	0
32.1	1.84	0.738	0	7.38	8.2	2.07918	78	1
76.9	1.52	0.478	0.239	22.705	23.9	2.58092	57	0
48.2	5.65	0.812	0.406	4.466	5.8	2.01284	90	0
34.8	1.78	4.4759	2.0345	23.8193	31.3	2.15836	79	0
27.6	1.06	1.833	1.521	9.282	13	2.34242	65	0
32.2	1.69	2.2896	0.4608	11.5488	14.4	2.28556	75	0
35.5	1.92	0.836	0.912	5.7	7.6	2.33646	59	0
44.6	1.36	2.212	1.264	12.008	15.8	2.60314	68	0
37.8	2.37	2.368	0.848	4.704	8	2.6464	68	0
25.8	1.17	0.4704	0.3752	4.7432	5.6	1.86332	88	0
42.7	1.55	4.448	1.112	22.24	27.8	1.57978	69	0
28.9	1.06	0.14	0.056	2.604	2.8	2.13354	80	0
29.8	1.55	0.03	0.12	2.64	3	2.07188	58	0
32.5	1.93	1.596	0.532	5.092	7.6	2.26007	58	0
36.1	1.14	0.4628	0.4264	4.2016	5.2	1.51851	52	0
40.5	1.53	1.548	0.702	6.471	9	2.35793	74	1
34	1.27	2.64	3.12	18	24	2.45332	61	0
31.9	2.53	0.6968	0.8576	11.8054	13.4	2.26245	45	0
34.5	0.99	0.6834	1.4076	8.0274	10.2	2.21219	75	0
35.4	2.23	0.5392	0.2432	0.0088	0.8	2.0607	72	0
25.5	1.85	1.332	0.222	19.536	22.2	2.13988	83	0
32.6	1.2	2.472	0.618	10.3	20.6	1.34242	71	0
49.6	4.2	1.2349	0.7689	21.2496	23.3	2.5611	54	1
38.3	2.09	2.45	1.225	16.66	24.5	1.61278	33	1
35.6	1.18	1.254	2.166	6.156	11.4	2.17319	68	0
39.3	1.25	1.474	0.938	10.586	13.4	2.3927	22	0
27.4	1.2	0.124	0.031	2.945	3.1	1.53148	73	0
30.7	1.8	0.204	0.1785	7.7265	8.5	2.11059	68	0
33.7	1.82	1.404	0.624	9.828	15.6	2.08636	60	1
54.7	1.65	0.9048	1.5444	12.9948	15.6	2.31387	64	0
29.3	1.3	0.8976	0.459	8.5578	10.2	2.4456	72	0
47.7	1.3	1.1753	1.4168	13.4757	16.1	2.43136	83	0
41.4	1.49	0.924	1.113	8.2425	10.5	2.46389	80	0
220.5	2.64	1.395	0.775	11.005	15.5	1.8451	66	0
27	1	0.7308	0.567	11.0628	12.6	0.778151	41	0
29	1.37	6.447	2.149	21.183	30.7	2.33646	19	0
29.2	1.3	0.045	0	0.819	0.9	1.04139	69	0
32.3	1.24	1.032	1.032	14.104	17.2	2.07918	76	0
72.4	1.63	0.9184	0.492	31.2256	32.8	2.53275	81	0
33	1.08	0.4677	0.4677	14.6546	15.59	2.15836	80	0
71	1.63	1.84	0.92	14.95	23	2.45025	76	0
34	2.06	0.3291	0.6582	8.9954	10.97	1.99564	67	0
48	1.08	0.6618	0.4412	9.927	11.03	2.31806	80	0
41	1.72	0.6736	1.0104	31.6592	33.68	2.0569	72	0
41	1.28	0.315	0.063	1.5435	3.15	1.74036	32	0
35	2.62	0.51	0.918	8.058	10.2	1.9345	66	0
31	1.11	0.112	0.224	5.264	5.6	2.26007	42	0
57	1.67	1.8354	2.1413	26.3074	30.59	2.70586	74	0
30	1.41	1.508	1.131	16.0225	18.85	2.49969	53	0
45.3	2.5	0.4225	0.3211	16.1564	16.9	2.15836	79	1
36	1.91	0.2425	0.1455	1.649	4.85	2.4183	75	0
34	1.36	0.1824	0.0864	0.1824	0.48	1.04139	67	1
54	1.67	0.168	0.014	0.406	1.4	1.32222	44	1
36	2.43	0.5922	0.1974	1.551	2.82	2.5563	43	0
43	1.41	0.62	0.496	10.912	12.4	2.19866	72	0
29	1.28	0.61	0.7625	13.725	15.25	2.31806	84	0
29	1.78	0.5675	0.681	9.988	11.35	1.74819	78	1
30	1.28	1.09	0.109	8.066	10.9	2.16137	72	0
29	1.64	0.4876	0.3657	11.3367	12.19	2.12385	54	1
69	2.19	0.6372	2.124	18.2664	21.24	2.24055	72	1
34	1.38	1.072	1.072	24.12	26.8	2.35218	68	0
36	1.51	0.6508	0.4881	14.9684	16.27	1.77815	90	1
34	1.44	0.717	0.717	12.6192	14.34	2.21484	77	0
40	1.15	2.272	1.704	9.656	14.2	2.5682	83	0
41	1.44	0.238	0.007	0.434	0.7	2.12385	55	1
29	1.27	1.762	0.5286	6.167	8.81	2.10721	71	0
43	1.33	2.6749	0.9304	7.7921	11.63	2.43136	25	0
42.9	14.47	0.4257	0.3729	2.4816	3.3	2.19033	65	1
69	3.06	3.6498	0.869	10.428	17.38	2.08991	48	1
41	2.7	0.9079	1.297	10.5057	12.97	2.50379	88	1
68.1	3.3	0.468	1.8	15.714	18	2.27875	83	1
41	1.29	0.582	0.388	18.236	19.4	2.12057	50	0
28	1.2	0.7396	1.2943	16.2712	18.49	2.13354	55	0
51.6	1.6	0.9062	0.161	3.5282	4.6	1.93952	74	1
37	1.27	0.8005	0.9606	14.2489	16.01	2.40483	60	0
33	1.25	0.4539	0.6052	13.9196	15.13	2.02531	77	0
36	1.54	0.7848	1.1772	10.8564	13.08	2.15534	70	0
48	1.35	0.444	0.111	9.657	11.1	2.60423	85	0
30	1.33	0.37	0.8325	8.0475	9.25	2.38202	68	0
33	3.01	0.2752	0.4128	12.7968	13.76	1.85733	51	0
48	1.23	0.6083	0.5214	7.5603	8.69	2.21219	79	0
49	3.14	0.5831	0.5831	6.9139	8.33	1.87506	52	1
42	1.89	0.2876	0.8628	13.0858	14.38	2.6637	70	0
37	4.98	0.8804	0.4402	36.9768	44.02	2.20683	82	0
35	3.95	0.2851	1.7106	21.3825	28.51	2.33244	76	0
44.4	1.9	1.17	0.26	8.56	10	1.81954	67	1
36	1.76	1.1478	0.7652	33.6688	38.26	2.2833	69	1
35	1.62	0.755	0.3775	5.738	7.55	2.11727	50	0
39.7	1.2	7.65	1.215	5.475	15	2.20683	35	0
28	1.18	3.192	2.926	18.62	26.6	2.68574	49	0
38	2.98	1.1844	1.5228	11.1672	16.92	2.03743	62	0
31	0.96	0.1764	0.0588	1.2054	1.47	2.02938	45	0
60.1	2.8	0.9215	0.4275	8.0845	9.5	2.24551	76	0
35	1.41	0.7399	0.4228	8.6674	10.57	2.21484	67	0
35	1.09	0.429	0.2574	7.722	8.58	2.06819	45	0
53.3	1.16	1.0368	1.008	12.2976	14.4	2.52244	62	0
32	1.42	0.596	0.8344	8.2248	11.92	2.36173	57	0
34	1.68	0.3274	1.3096	30.1208	32.74	2.61066	71	1
42	1.78	0.5376	1.6128	15.7696	17.92	2.1959	81	0
40	4.44	0.7302	0.9736	22.1494	24.34	2.71684	75	1
34.2	1.42	0.4335	0.2635	7.633	8.5	2.09342	61	0
35	1.16	2.3736	1.4835	24.9228	29.67	2.58433	47	0
69.6	1.75	0.3634	0.4345	7.0784	7.9	2.17026	76	1
27	1.87	1.0206	3.402	27.8964	34.02	2.29667	71	1
36	1.23	2.1656	3.5191	19.7611	27.07	2.44248	87	0
37	1.2	0.5991	0.5991	18.5721	19.97	2.5302	66	1
35	3.06	0.9992	1.249	22.482	24.98	2.24551	90	0
34.6	1.5	1.2376	0.6868	4.8484	6.8	2	24	0
63	1.37	0.84	1.2	8.28	12	1.91381	54	0
41	2.58	0.7794	0.7794	11.4312	12.99	2.3483	59	0
39	2.96	1.2023	1.093	6.558	10.93	2.30963	85	0
29	1.25	1.262	0.5048	11.1056	25.24	1.30103	37	0
45	2.76	0.472	0.0944	0.3304	4.72	2.23045	56	0
40	1.72	1.2064	1.8096	22.9216	30.16	2.45788	33	0
27.9	1.21	0.22	0.02	1.48	2	1.30103	68	0
29	1.45	0.444	0	10.545	11.1	1.92428	65	1
28	1.41	0.5835	1.0503	10.0362	11.67	2.13988	80	0
53	6.58	0.5733	0.3276	4.5045	8.19	2.14301	73	0
34	1.72	0.4927	0.1895	2.653	3.79	2.21484	28	0
29	1.41	1.116	1.395	11.16	13.95	2.38561	62	0
69.4	1.4	0.9796	0.9548	9.5356	12.4	2.52244	42	1
38	1.25	0.1486	0.2972	4.5323	7.43	2.23553	76	0
31	1.16	0.7158	1.9088	20.9968	23.86	2.28556	41	0
55	1.93	0.9156	0.3924	11.6412	13.08	2.16435	42	0
42	2.59	0.2968	0.5936	6.5296	7.42	2.2833	81	0
39	2.85	1.89	2.97	21.6	27	2.35984	85	0
25.4	1.17	0.8109	0.4896	13.9077	15.3	2.54407	53	0
25	1.34	3.1331	1.9788	11.3781	16.49	2.45637	38	1
40	1.99	0.802	0.3208	5.1328	8.02	2.45179	54	0
36	1.38	0.5824	0.728	12.5216	14.56	2.69723	53	0
35	1.43	0.4825	0.579	8.492	9.65	2.33041	67	0
26	1.12	0.4386	1.3158	12.7194	14.62	2.30535	85	0
45	1.6	1.7325	0.315	13.545	15.75	2.30103	42	1
62	1.93	0.9966	2.3254	13.1219	16.61	2.1271	69	0
23	1.22	1.3176	0.5856	12.444	14.64	2.5302	90	0
58	2.71	0.3328	0.1664	7.7376	8.32	2.16435	57	0
42	2.26	0.6732	0.7854	9.537	11.22	2.33646	85	1
101	1.56	1.338	0.223	18.063	22.3	1.83885	66	1
32	1.33	1.1745	0.216	12.042	13.5	2.03342	86	0
43	1.47	0.6189	1.0315	17.9481	20.63	2.26951	79	0
35	1.37	1.4091	2.8182	39.9245	46.97	2.4133	82	1
35	1.33	1.755	1.755	28.431	35.1	2.24304	70	0
35	1.46	0.2751	0.2358	2.6331	3.93	1.36173	38	0
35	2.22	1.4993	0.8178	10.7677	13.63	2.35218	75	1
48	2.45	1.871	0.3742	23.5746	37.42	2.38739	72	1
31	1.06	0.494	0.988	20.254	24.7	2.2014	62	0
24	1.11	0.4228	0.6342	7.0819	10.57	2.66087	70	0
72	2.62	0.5856	1.952	16.9824	19.52	2.3075	73	0
34	1.47	0.1481	0.2962	11.848	14.81	2.32838	71	0
26	1.16	0.599	0.599	10.6622	11.98	2.29667	61	0
32	1.3	0.6325	0.759	11.132	12.65	2.34044	68	0
44	1.4	0.2177	1.3062	20.0284	21.77	2.57634	61	0
34	1.1	1.309	0.714	9.877	11.9	2.3927	47	0
41	1.72	0.167	0.1002	3.0394	3.34	1.59106	37	1
37	1.73	0.344	0.12	7.528	8	2.43457	66	0
52	1.04	0.296	0.74	6.29	7.4	1.90849	90	1
30	2.14	0.747	0.1992	1.1703	2.49	2.22011	46	0
37	1.4	0.418	0.152	2.622	3.8	1.89209	35	1
68	1.62	0.44	0.484	2.332	4.4	2.41497	56	0
48	1.38	0.996	1.992	18.924	24.9	2.05308	58	0
32	1.43	1.5444	1.1232	11.232	14.04	2.3032	54	0
28	1.23	2.3166	2.5272	15.795	21.06	2.35793	32	0
32	1.82	0.7044	0.8805	7.3962	17.61	2.3962	54	0
57	3.25	0.8152	0.4076	37.4992	40.76	2.27875	63	0
34	1.11	0.738	0	3.936	4.92	1.78533	68	0
112	9.07	1.0149	0.3582	4.3581	5.97	1.5563	63	1
26	1.33	0.947	0.3788	17.2354	18.94	2.24551	74	0
33	1.07	1.673	1.3145	8.9625	11.95	2.29447	21	0
30	1.03	2.032	1.27	9.398	12.7	2.12385	41	0
26	2.75	0.2534	2.0272	20.272	25.34	2.05308	55	1
30	1.25	0.1771	0.5313	15.7619	17.71	2.26951	64	0
31	1.19	0.471	0.471	22.608	23.55	2.233	32	0
38	1.45	0.1853	0.1853	12.2298	18.53	2.12057	57	0
35.7	1.7	1.1564	1.6048	20.8152	23.6	2.26482	83	0
20	1.09	0.4611	0.4611	14.4478	15.37	2.17898	59	0
35	1.21	0.84	1.092	6.3	8.4	2.27646	80	0
56	4.21	1.3442	1.2408	7.238	10.34	2.55991	63	1
32	1.45	0.8272	0.5264	6.016	7.52	1.60206	65	1
33	1.88	0.589	2.0615	23.8545	29.45	2.22531	54	0
33	1.38	1.0458	1.3446	12.4002	14.94	2.62014	69	0
63	1.33	0.3766	2.4479	14.6874	18.83	1.73239	83	1
37	2.05	1.29	0.3225	30.6375	32.25	2.34242	61	0
31.8	1.5	4.3225	2.3075	25.7725	32.5	2.48855	63	0
36	1.48	0.6032	0.9048	20.2072	30.16	2.24304	67	0
38	1.48	1.139	1.8224	19.5908	22.78	2.21484	78	0
37	1.5	0.6512	0.6512	6.7562	8.14	2.1271	49	0
29	1.19	0.9625	1.05	6.65	8.75	2.26717	73	0
39	2	0.3044	0.4566	14.1546	15.22	1.716	57	0
30	1.39	0.4683	0.9366	44.9568	46.83	2.50106	63	1
48	1.21	0.4494	0.1498	14.3808	14.98	2.13354	57	0
34	1.41	1.0754	0.9622	3.5658	5.66	2.03743	60	0
32	1.9	3.7712	0.4714	15.0848	23.57	2.63749	78	1
28.8	1.12	1.0912	0.2852	10.9988	12.4	2.61595	70	0
39	2.46	0.4212	0.2106	6.3882	7.02	1.69897	30	0
31	1.5	1.0212	2.0424	21.7005	25.53	1.39794	48	1
106.4	1.1	0.229	1.145	20.61	22.9	2.43297	85	0
31	1.09	2.246	0.5615	8.3102	11.23	2.36922	65	0
33	1.17	0.799	0.4794	6.7116	7.99	2.04139	63	0
43	2.11	1.576	0.394	0	1.97	1.716	77	0
40	1.38	0.6843	0.6843	19.8447	22.81	2.51983	59	0
29	1.29	1.0896	1.0896	15.7992	18.16	2.08279	51	0
31	1.97	3.2975	0.5276	9.3649	13.19	2.12057	73	0
46	2.02	0.9012	1.0514	12.9172	15.02	1.64345	58	1
34	1.05	0.1669	1.0014	12.3506	16.69	2.4014	64	1
54	2.41	13.348	0.376	2.068	18.8	1.6902	58	1
34.4	1.2	0.5544	0.2541	6.8915	7.7	2.23045	77	0
20.4	1.12	0.1876	0.2144	12.998	13.4	2.21484	67	0
33	1.44	2.611	0.746	32.451	37.3	2.31597	71	0
34	1.52	0.4955	0.6937	8.7208	9.91	2.04139	62	1
56	5.59	0.5973	0.543	3.9096	5.43	2.18184	76	0
69	3.56	4.6326	1.7648	16.3244	22.06	2.22272	68	1
33	1.28	0.675	1.6875	24.3	33.75	2.52244	84	0
28	1.26	0.8162	0.3498	10.3774	11.66	2.16137	81	0
35	1.43	0.3506	0.3506	16.4782	17.53	2.06819	77	0
37	1.4	0.798	0.152	1.976	3.8	1.89763	72	0
40	1.18	2.0976	1.9228	13.4596	17.48	2.23805	89	0
33	1.43	0.4944	0.2472	5.2736	8.24	1.89763	66	0
38.3	1.4	0.4332	0.0138	0.1494	0.6	1.60206	60	1
28	1.07	0.4016	0.1004	9.538	10.04	1.9345	62	0
34	1.42	1.0992	0.5496	6.2288	9.16	2.30535	72	0
33	1.22	0.875	0.7	6.9125	8.75	2.39794	75	0
28	1.17	0.8195	0.3725	5.8855	7.45	2.34242	51	0
38	1.35	0.3306	0.0551	3.0305	5.51	1.74819	59	0
30	1.34	0.948	2.212	26.86	31.6	2.33041	55	0
36	1.13	1.6576	1.6576	16.9904	20.72	2.33846	81	0
30	1.66	0.3212	0.1606	3.212	8.03	2.40483	20	0
33	1.32	1.5064	0.5649	14.6874	18.83	2.03743	49	0
59	1.62	0.324	0.162	2.349	8.1	2.05308	54	0
34	1.34	0.9488	0.4744	8.5392	11.86	2.45939	59	0
37	1.92	3.3855	0.8235	4.8495	9.15	2.29885	82	0
34.2	1.46	0.855	0.555	13.575	15	1.92942	43	0
36	1.16	0.8976	1.3464	19.9716	22.44	2.59879	61	0
35	3.04	1.2771	0.7095	12.2034	14.19	2.24304	50	0
144	6.58	0.8825	0.353	14.6495	17.65	1.53148	31	0
55	1.62	1.052	1.4465	10.6515	13.15	2.52634	57	0
35	1.58	0.567	0.108	0.225	0.9	1.6721	69	0
31	1.25	0.7084	1.1592	4.4436	6.44	2.13672	54	1
31	1.12	1.59	0.7155	5.565	7.95	2.2014	83	0
23.3	1.34	0.4352	0.3712	11.968	12.8	2.65896	73	0
46	1.46	1.379	0.4925	7.3875	9.85	2.29226	44	0
28	1.32	1.28	0.48	12	16	2.46982	72	0
32	2.13	0.641	0.641	24.999	32.05	2.34242	69	1
38	2.01	5.06	1.012	44.022	50.6	2.56585	46	0
30	1.12	1.5295	0.931	3.9235	6.65	2.23045	55	0
118	3.06	0.9775	0.1725	1.955	5.75	2.51055	65	0
50	2.74	0.432	0.324	9.18	10.8	2.15836	68	1
40	1.15	1.948	2.1915	20.2105	24.35	2.5563	74	0
41	2.11	1.2906	0.8604	11.9022	14.34	2.38382	35	0
26	1.36	0.5384	0.8076	12.114	13.46	2.19866	82	0
49	1.21	1.224	0.68	4.488	6.8	2.10721	70	0
25	1.73	0.443	0.2658	7.1766	8.86	2.63849	69	1
42	1.13	0.9115	0.3646	16.5893	18.23	2.30103	49	1
92	1.73	1.024	0	40.448	51.2	2.58546	80	1
36	1.33	1.3887	1.0801	12.6526	15.43	2.12385	59	0
38	1.06	2.1938	1.4103	11.5958	15.67	2.51055	71	1
46	2.14	0.9416	1.4124	20.9506	23.54	2.03743	63	1
46	4.52	0.7645	0.7645	13.6081	15.29	2.07188	49	1
34	1.26	0.2648	0.1324	12.7104	13.24	2.24055	90	0
38	2.32	3.7912	0.2031	2.5049	6.77	1.88081	71	1
28	1.06	0.84	1.085	33.04	35	2.38021	46	0
35	1.24	0.5445	1.815	13.431	18.15	1.88081	27	0
42	2.19	0.2745	0.2196	4.1175	5.49	1.74036	32	0
34	1.4	0.8145	1.086	24.1635	27.15	2.18752	75	0
31	1.36	2.7228	0.9076	17.6982	22.69	2.26717	87	0
69	5.15	0.66	0.66	20.46	22	2.54158	52	0
41	1.85	0.3366	0.8415	13.6323	16.83	1.69897	90	0
42.2	1.18	1.37514	1.28699	14.1569	17.63	2.27184	90	0
34.8	1.54	0	0.2908	27.626	29.08	2.15229	65	0
48.2	2.31	0.1625	0	13.1625	16.25	1.6721	25	0
24.4	1.08	1.1328	1.1328	14.7264	18.88	2.12057	79	0
41.8	1.5	0.4173	0.5564	9.4588	13.91	2.29447	69	1
47.5	2	0.458	0	6.2288	9.16	1.92942	60	0
34.3	1.04	0.69921	0.5484	12.2705	13.71	2.2833	88	0
40.5	4.71	0.64155	0.78819	16.7903	18.33	1.93952	61	0
52.9	2.19	0.83582	0.27255	16.8618	18.17	2.32634	78	1
50.9	2.2	2.86	4.576	44.616	57.2	1.89209	86	1
24.2	1	0.48422	0.71852	14.3392	15.62	2.39094	74	0
21.5	1.32	0.4485	0.4485	11.5115	14.95	2.60959	58	0
24	0.98	0.5934	0.0989	8.7032	9.89	1.95424	33	0
26	1.89	0.251	0.1506	0.7781	2.51	2.08279	46	0
32.5	1.38	0.6086	0.3043	22.8225	30.43	2.63347	85	0
39.4	1.09	2.3241	1.0668	8.4709	12.7	2.6464	74	0
39.5	18.1	0.7531	0.86828	7.02598	8.86	2.11727	76	1
25.2	1.2	1.0452	1.0452	20.904	26.13	2.53403	55	0
40.6	1.2	1.02311	0.49203	5.79502	7.81	2.59106	54	0
43.9	2.56	0.23836	0.33936	3.4138	4.04	1.83885	68	0
65.5	3.47	2.0223	1.3482	11.4597	22.47	2.233	38	0
32.6	1.76	1.09327	2.44596	14.3237	18.53	2.617	72	0
28.6	6.09	0.57148	1.36747	18.4098	20.41	2.26717	79	0
40.6	1.1	0.59103	0.69849	4.57899	5.97	1.95904	66	0
33.9	2.98	0.944	1.888	17.464	23.6	2.20683	66	0
30.9	1.25	0.92964	1.0668	12.9692	15.24	2.53148	88	0
33.6	1.12	1.19947	0.60534	9.25946	11.21	2.21748	24	0
20.9	1.14	2.2953	0	30.4947	32.79	2.66745	81	0
79.3	1.62	0.5719	0.70262	14.4936	16.34	2.4216	61	1
34.8	1.41	0.2709	0.1591	1.6899	2.15	2.33041	66	0
57.7	3.23	2.556	0	11.7576	17.04	2.35218	64	1
55.1	8.77	2.79746	2.59109	17.0829	22.93	2.18469	87	1
32.9	1.14	0.93909	1.2249	11.3371	13.61	2.38021	74	0
37.7	1.43	0.70602	0.72324	15.6185	17.22	2.41162	78	0
34.5	1.73	0.3435	0.3435	3.3205	11.45	2.08991	65	1
26	1.19	3.88108	0.85988	18.4526	23.24	2.4133	66	0
33	1.33	0.3939	0	12.6048	13.13	2.17898	78	0
92.8	4.57	4.5429	0.4782	17.2152	23.91	2.21748	76	0
43.2	1.37	1.91864	1.85248	12.4877	16.54	2.58433	68	0
35.1	1.2	1.31176	0.41424	6.87811	8.63	2.06446	88	0
28.1	0.99	0.30752	0.63488	8.78912	9.92	1.96379	60	0
40.4	1.4	1.11408	0.57392	15.1076	16.88	2.39445	80	0
33.7	1.51	0.1413	0.0942	0.9106	1.57	1.83885	25	1
57.7	1.87	0.55	1.342	19.954	22	2.54033	71	0
197	2.35	6.6631	0.8691	13.3262	28.97	1.9345	62	1
20.1	1.14	1.55727	1.95657	36.1367	39.93	2.6561	62	0
37.1	2.99	0.7384	1.77216	15.8018	18.46	1.90309	55	0
26.8	1.23	1.00843	0.39036	30.8384	32.53	2.58995	68	0
29.1	1.21	0.4284	0.1547	11.2336	11.9	2.62737	66	0
31.8	1.47	1.2176	0.4566	10.654	15.22	2.01284	72	0
33.2	1.31	2.05232	0.79248	6.68528	10.16	2.35603	86	0
31.1	1.15	0	0.908	11.577	22.7	2.26951	90	0
20.1	1.04	0.3017	0	3.879	4.31	2.09691	73	0
39.7	1.67	0.87768	1.27836	16.3516	19.08	2.57634	84	0
35.3	1.7	0.85648	0.37168	14.8349	16.16	1.62325	53	0
31.7	1.02	0.13632	0.21939	1.75938	2.13	1.99123	63	0
30	1.62	0.321	0	12.0375	16.05	2.23805	55	0
33.1	1.07	1.474	0	25.4265	36.85	1.77085	77	0
34.3	1.45	1.4406	1.2348	8.0262	20.58	2.37291	83	1
36.5	1.52	0.2401	0.5537	4.0866	4.9	2.08636	76	0
24.6	1.01	0.6984	0.9312	17.46	23.28	1.8451	59	0
25	1.19	0.9405	0.8415	6.1875	8.25	2.33646	71	0
26.5	1.28	1.023	0.924	1.287	3.3	1.5682	70	0
29.1	1.17	0.6727	0.2883	8.649	9.61	2.49136	85	0
30.6	1.37	0.63635	0.19669	10.5981	11.57	1.5682	52	0
32.4	1.06	0.60367	0.94537	9.77262	11.39	2.56703	73	1
28.8	1.18	0.43176	1.38523	16.0651	17.99	2.64836	63	0
38.9	1.95	0.0844	0.2532	2.0678	4.22	2.57519	82	1
40.7	2.3	1.7028	5.1084	53.6382	85.14	1.94939	70	0
39.2	1.11	0.4238	0.8476	15.0449	21.19	2.10721	30	0
61.4	2.75	0.7212	0.9015	13.3422	18.03	2.0607	65	1
35.4	0.93	1.9043	1.7673	9.6585	13.7	2.32222	75	0
35.4	1.7	0.6568	0.4105	2.2988	8.21	2.25285	79	1
36.8	2.52	0.8478	0.2355	2.6376	4.71	1.78533	82	1
50.7	3.88	0.7416	0.1854	11.8656	18.54	2.29003	65	1
28.5	1.23	2.3968	0.6848	12.1552	17.12	2.46687	71	0
63.1	1.27	1.224	0.102	7.548	10.2	2.27646	80	0
171.4	3.5	1.161	0.999	24.624	27	2.42813	78	1
39.9	1.26	0	1.2987	5.7942	9.99	2.22531	51	0
36	2	1.5066	0.5022	17.3259	25.11	2.15229	59	0
28.4	1.14	0.9348	0.9348	25.5512	31.16	2.68485	76	0
43.8	1.44	0.16	0.64	7.68	16	2.11727	66	0
41.7	2.62	0.4968	0.2484	6.9552	8.28	1.80618	49	1
31.5	1.33	0.9246	0.4623	10.6329	15.41	2.36922	71	0
37.3	1.63	0.49781	0.57954	6.30807	7.43	2.13988	75	0
31.8	1.5	1.77228	1.68476	18.2479	21.88	2.49969	81	1
53.6	1.4	0.73161	0.79812	20.4407	22.17	2.39445	51	0
38.1	4.91	1.2811	1.20312	8.47754	11.14	2.1038	86	1
62.8	3.11	0.5544	0.5544	13.86	18.48	1.88649	36	1
33.2	1.47	0.9546	0.9159	10.7328	12.9	2.25285	84	0
26.4	1.45	2.0052	2.6736	15.596	22.28	2.5832	58	0
87.6	1.54	3.348	1.674	22.599	27.9	2.51055	74	0
34.8	1.39	0.76076	1.21429	12.216	14.63	2.11727	68	0
29.8	1.23	1.86745	0.8398	8.27645	11.05	2.38021	62	0
34.2	1.45	2.32	0.5568	4.7328	9.28	2.15229	34	0
28.7	1.18	0.35717	0.41256	1.02185	1.91	1.83885	78	0
34.5	2.26	1.3446	0.4482	12.4002	14.94	2.55145	84	1
29.5	1.09	1.20916	1.07844	5.80887	8.17	2.28103	62	0
29	1.3	1.2761	0.7292	16.2247	18.23	2.02119	56	1
90	2.6	3.4587	0.9882	29.646	49.41	1.6721	69	1
49	3.3	0.4662	0.4662	3.4188	7.77	1.85733	53	0
34	1.4	0.3773	0.1078	4.9049	5.39	2.14613	90	0
51	2.3	0.8724	0.3635	5.8887	7.27	2.26007	73	0
30	1.3	0.7872	0.5904	18.3024	19.68	2.58092	55	0
35	1.8	1.007	0.53	3.71	5.3	2.5966	59	0
27	1	4.5972	1.0216	18.3888	25.54	2.59106	35	0
40	1.7	4.08	3.12	16.32	24	2.45637	71	0
43	1.2	0.426	0.213	18.957	21.3	2.4216	60	0
22	1.1	1.4064	0.3516	14.7672	17.58	2.54283	73	0
77	1.2	2.344	1.465	10.6945	14.65	2.23553	73	0
29	1.2	1.0744	0.6952	4.5504	6.32	2.16732	69	0
40	1.5	0.3849	0.7698	8.5961	12.83	1.86332	48	0
47	4.9	0.2753	0.2753	22.8499	27.53	2.68485	66	1
45	1.2	1.3968	0.4365	6.8967	8.73	2.03342	78	0
47	1.8	0.3602	0.9005	16.7493	18.01	2.71096	61	0
35	1.4	0.6486	0.1081	10.0533	10.81	2.30103	34	0
40	2.1	0.6322	0.3924	0.6322	2.18	1.57978	59	0
51	1.9	0.495	0.495	16.83	24.75	1.9345	79	1
39	1.2	0.6114	2.2418	17.5268	20.38	2.19312	64	0
43	1.2	2.086	1.6688	16.8966	20.86	2.40993	60	0
36	1.2	1.6796	1.0336	10.2068	12.92	2.24304	56	0
31	1.2	2.5578	0.9702	5.1156	8.82	2.29003	68	0
36	1.7	2.6288	0.9858	16.1014	32.86	2.11727	85	0
34	1.4	0.2975	0.1785	3.5105	5.95	1.81291	30	0
51	2.7	0.4325	0.4325	40.2225	43.25	2.24304	30	1
49	1.1	1.6464	0.6174	8.0262	10.29	2.47276	57	0
36	1.1	0.0789	0.0789	7.4955	7.89	2.36173	63	1
41	1.9	0	1.0419	33.6881	34.73	2.27184	58	1
91	2.2	1.4	0.525	15.575	17.5	2.43775	83	1
29	1	0.4108	0.8216	37.3828	41.08	2.39445	78	0
45	1.5	0.2158	0.039	0.0052	0.26	0.954243	74	1
106	3.1	0.4736	0.1184	5.5648	11.84	1.81954	75	1
36	0.97	0.5488	0.3024	10.304	11.2	2.46982	84	0
39	16.95	1.863	0.3645	38.232	40.5	2.19033	65	0
29.4	2.49	1.1985	1.683	22.6185	25.5	2.36922	44	0
28	1.51	0.5549	0.1611	16.9692	17.9	2.42813	62	1
33.7	1.25	1.5652	0.8342	6.1662	8.6	2.16137	24	0
31.4	2.69	1.2145	1.4574	31.7852	34.7	2.13354	84	1
34.8	1.19	2.272	1.8744	24.1684	28.4	2.49693	47	0
71.7	4.68	1.274	0.6006	16.2526	18.2	2.50379	83	1
40.7	1.29	0.2254	0.3626	4.2973	4.9	2.07188	74	1
46.7	4.33	0.5577	0.4563	49.686	50.7	2.52892	69	0
56	2.98	1.1264	0.5312	4.64	6.4	2.19033	89	0
27.5	1.25	1.2992	0.8624	8.9712	11.2	2.17319	58	0
61.9	1.46	1.734	0.684	3.54	6	1.59106	48	0
42.2	2.52	1.1934	0.4437	3.3252	5.1	2.02531	78	0
34.9	1.37	3.2606	1.5618	22.2214	27.4	2.71684	73	0
36.4	1.32	0.784	0.912	14.192	16	2.66558	64	0
30.1	1.34	2.7808	2.4964	25.8804	31.6	2.51322	51	0
42.2	1.07	1.2875	1.1875	9.8875	12.5	2.50786	76	0
29.2	1.5	0.048	0.12	3.824	4	2.1038	77	0
37.5	1.82	2.3436	0.5952	34.224	37.2	2.71012	76	0
31.7	1.64	2.898	0.0345	31.2915	34.5	2.36361	90	0
40	1.58	6.4619	1.3783	9.4512	17.9	2.29226	77	0
31.6	1.28	1.4906	1.5163	22.6417	25.7	2.77815	23	0
76.2	2.48	0.54	0.48	28.86	30	2.39794	73	0
53	2.61	2.7468	0.8175	28.2855	32.7	2.11727	53	0
35.1	1.17	0.8155	0.4445	2.0335	3.5	1.88649	65	0
27.1	1.32	0.525	1.05	10.8875	12.5	2.08279	80	0
30.1	1.64	0.7176	0.7852	3.6712	5.2	1.63347	36	0
30.5	1.48	0.4619	0.7301	13.6335	14.9	2.31597	82	1
30.4	1.33	1.1562	1.3959	11.5056	14.1	1.97772	87	0
48.1	1.11	0.8188	0.2403	7.8142	8.9	2.06819	53	0
48.8	2.45	0.8848	1.5168	12.9086	15.8	2.23553	73	0
23.6	1.19	1.7664	1.7152	22.0672	25.6	2.13354	65	0
38.8	1.09	0.8211	0.5355	10.5077	11.9	2.41162	71	0
36	1.42	1.984	1.1005	12.0125	15.5	2.18469	83	1
31.2	0.98	0.6786	0.6612	15.8688	17.4	1.47712	59	0
43.1	1.21	1.0246	0.8938	8.9707	10.9	2.31387	78	0
25.3	1.13	1.5748	0.2604	10.2548	12.4	2.55388	29	0
38.4	3.14	0.945	1.9845	15.6114	18.9	2.02938	80	0
41.1	1.79	5.6561	2.8107	25.5739	34.7	2.84696	47	0
25.2	1.1	0.308	0.203	2.975	3.5	2.0086	76	1
45.1	1.09	0.924	0.213	1.764	3	2.29667	60	0
33.6	1.69	0.4158	0.7161	21.945	23.1	2.31175	36	0
34.4	1.54	3.6516	1.3604	12.4763	17.9	2.40483	39	0
45.6	2.41	0.9768	0.3441	9.768	11.1	2.25768	80	0
31.7	1.16	0.75	1.125	10.6125	12.5	2.25285	86	0
37.1	1.05	2.1756	0.5476	11.9436	14.8	2.43457	27	0
28	1.16	1.6906	0.6848	18.9176	21.4	2.14301	66	0
43.8	1.22	17.856	4.32	72.288	96	2.33041	64	0
44.4	1.39	1.5408	1.1808	11.4624	14.4	2.31175	73	0
34.7	1.06	0.7497	0.4046	10.6386	11.9	2.30963	81	0
29.7	1.24	0.8775	1.7667	8.5293	11.7	2.29003	76	0
45.1	3.47	0.7308	0.8323	18.6963	20.3	2.30535	85	0
48.2	4.09	0.2023	0.0469	0.4431	0.7	1.07918	58	1
33.8	1.72	0.7068	1.539	9.0744	11.4	1.6902	69	0
60.4	2.6	1.5642	2.0066	12.1818	15.8	1.6721	34	1
30.4	1.19	1.0005	0.6612	6.7947	8.7	2.1271	90	1
[truncated: 3,419 more rows]
