# Supplementary material for: Explainable AI-driven heterogeneity using coagulation–inflammatory markers improves prognosis prediction, risk stratification, and anticoagulant treatment effects for sepsis
Source: Research Square preprint supplement (doi:10.21203/rs.3.rs-5835917/v1), 2025-02-27
Supplement: Supplementary file 3 [file 798502e286e9717acc84c5dd.xlsx]

## Sheet: Diagnostic markers-LASSO
outcome	CD59	CR1	CD55	SERPINB2	CFD	P2RX1	MAPK14
0	5.24328	6.31765	9.07018	2.3569	10.0578	4.66225	6.40921
1	7.8475	7.44131	9.59347	3.02665	6.90162	6.92221	7.88883
1	7.63088	8.45563	10.1326	6.11336	9.01942	6.41582	8.22919
1	7.04822	8.49863	9.54431	3.32923	7.97853	6.54494	8.19277
1	6.06508	7.19341	8.91118	3.1101	8.8561	6.6393	7.34712
1	7.36075	7.982	10.2011	4.54102	6.90724	7.61453	8.3998
1	7.82708	8.13907	10.1553	4.40195	6.33532	6.05331	8.39394
1	5.38834	6.90008	8.70846	3.6764	7.03018	6.13069	6.66459
0	4.91932	5.19124	7.10778	2.98225	8.15717	4.82727	5.78176
1	6.10987	7.92538	9.08727	3.96004	7.73536	5.46437	7.39601
1	9.29718	8.26581	10.3187	3.11002	5.50701	6.03586	9.11834
1	7.67994	8.45659	9.75943	3.22524	5.53812	6.78156	8.30706
1	7.21343	5.0823	8.54894	5.23036	7.19476	6.47306	6.8569
1	6.85849	7.96048	10.1367	4.50599	9.05082	6.71178	7.90606
1	7.31468	7.52889	9.70615	3.81793	5.60509	6.88735	8.10263
1	7.0555	7.51442	9.06556	3.65596	7.19349	5.70459	7.99856
1	7.26358	6.8618	9.69968	5.60341	5.18458	6.36364	7.3894
1	7.40535	6.91804	8.89852	4.62303	3.84494	6.53806	7.25278
1	8.6638	8.37933	10.311	4.10306	7.46025	6.86645	8.74916
1	6.74745	7.72727	9.5959	3.15805	9.36902	6.62923	7.93421
1	8.52167	7.87213	9.83088	5.23538	4.7339	7.47275	8.38249
1	6.10088	6.66138	9.67773	3.87138	6.76649	5.40179	6.686
1	7.85024	7.43034	9.30797	4.87467	7.72012	7.17892	7.77852
1	6.93146	6.00342	9.62355	4.89175	6.29554	4.00254	6.85127
1	7.61577	7.10159	9.31671	3.89506	6.93663	6.06617	7.20146
1	8.27439	8.2885	10.0261	3.78665	8.79862	7.73994	8.6074
1	6.56351	7.15231	8.92393	3.32524	6.15519	6.58575	7.20296
1	5.84176	6.69722	8.18456	3.36437	10.1236	7.16405	7.71638
1	8.36893	8.85867	10.232	4.63864	6.30016	6.70119	8.40282
1	7.48527	8.18375	10.2183	4.30227	6.34503	5.1984	8.14928
1	7.8495	8.30207	10.2961	4.60839	7.51925	6.51525	8.44296
1	6.43956	8.68084	9.65765	3.60489	9.29009	6.21433	8.07938
1	7.05904	5.48884	8.847	4.99583	5.67634	5.42448	6.17675
1	8.51224	8.33611	10.1851	3.24625	8.16188	7.98987	8.73538
1	6.90046	7.07735	9.25043	4.25963	9.26866	5.5232	7.6383
1	6.61774	7.21273	8.57456	3.07011	9.14199	6.3114	7.7507
1	7.90932	8.57052	10.2769	5.81967	6.6457	5.69273	8.24229
1	6.88732	7.837	9.33262	2.78997	9.58637	6.92914	8.07409
1	7.9818	7.99383	10.0205	6.74503	6.36206	6.70696	8.11078
1	7.55027	9.09557	10.1653	3.49953	7.92591	7.10655	8.34135
1	7.31207	8.90819	10.1481	3.77477	5.40597	6.09841	8.3199
1	7.41695	8.56452	9.91805	5.1269	8.57334	7.77974	8.43627
1	6.44665	6.13188	9.06075	2.97627	6.72983	5.30422	6.72112
1	8.93772	7.87444	10.0667	4.84539	4.50465	5.72995	8.97127
1	8.33293	8.61496	10.0924	3.22281	8.09346	5.63685	8.39124
1	6.5196	7.84632	8.90377	3.63155	9.5733	7.41811	7.61257
1	7.34804	8.00613	9.57207	3.32304	5.73142	6.23091	7.69367
1	7.12584	7.28609	9.39263	2.8463	8.43218	6.2513	8.16765
1	6.78109	7.57915	9.28226	3.88874	6.62714	6.93446	7.86288
1	7.81244	7.3442	10.2359	4.10414	6.21307	5.85392	8.30322
1	6.82913	7.8217	9.29575	3.47462	10.33	6.62643	7.63124
1	7.766	7.54242	9.80763	3.86569	4.74337	5.75884	6.86824
1	6.82596	7.36389	9.4079	3.19629	5.55591	6.37111	8.01241
1	7.10184	5.70848	10.5321	3.6996	3.69859	6.39487	7.58682
1	8.28921	7.2968	9.9894	4.73276	4.06566	6.85439	8.4068
1	6.75295	7.33173	9.24439	3.11037	9.37028	7.19122	7.65486
1	6.70781	6.77138	8.9354	3.03022	6.21009	6.47266	7.40462
1	8.4342	8.54273	9.99798	4.55398	8.34974	7.57142	8.59435
1	8.53203	7.88428	9.95307	4.58995	8.75119	7.84539	8.99258
1	8.3976	8.59702	9.90426	3.17577	6.38989	5.9418	8.16238
1	7.45536	8.16868	9.96847	4.20409	5.43439	6.2383	8.21925
0	4.73171	4.48211	7.78493	3.67777	7.10157	4.40155	5.36793
1	7.96759	8.15405	10.349	5.66093	6.36735	6.70927	8.43364
0	5.18771	5.1677	7.82203	2.31125	8.12132	5.43979	5.58841
1	7.80392	8.05769	10.2651	4.6444	5.42244	6.43879	7.96752
1	7.24548	8.65458	9.18795	4.09114	9.77778	7.40068	7.42344
1	7.6176	7.08332	10.016	2.90399	8.55451	6.23648	7.77752
1	7.81554	6.20303	9.83302	4.20882	5.7011	6.72661	7.7766
1	7.66697	7.02705	9.63963	6.33224	5.89272	6.92538	8.05332
0	5.31316	5.00415	7.59179	2.75237	7.79019	5.19097	5.88441
0	5.07142	5.06174	8.30199	2.55676	8.07901	5.8093	5.99391
0	5.03938	5.17185	8.1858	2.6002	9.02608	5.87574	5.76419
1	8.22338	8.28447	10.1229	3.37311	7.0687	6.62285	8.52945
0	5.06635	5.144	7.95289	2.32767	9.04192	5.20417	5.8131
0	5.91878	5.55343	8.6987	2.47277	7.68952	4.59219	5.72403
0	5.10184	5.34813	8.11025	2.9609	7.64868	5.32543	5.44685
1	6.22947	7.33455	10.1516	4.66822	7.78979	6.8857	7.52713
1	6.77492	7.46332	9.08999	4.36304	7.64142	7.14239	7.0955
1	7.65943	8.60834	10.0279	2.59078	4.92441	7.34706	8.29556
1	6.17909	7.23482	9.07278	3.05534	6.53988	5.4864	6.72906
1	6.94425	7.43174	8.87024	2.56847	6.30303	6.5755	8.11098
1	7.17683	7.26532	9.6782	4.64964	6.19376	5.55008	7.67883
1	8.48498	8.08116	10.0621	4.64165	6.21667	6.0951	8.49957
0	5.40834	5.60518	7.91663	2.65017	9.14017	5.23573	5.87802
1	8.27077	8.26081	9.77374	4.62598	5.33443	6.75796	8.57021
1	6.886	7.78839	9.38155	4.12769	7.66173	7.38078	7.86871
1	6.5443	6.2785	8.56981	3.27006	6.10567	5.40642	6.49813
1	7.41323	8.06319	9.90708	3.58525	7.78001	5.4684	7.90546
1	8.80069	8.75433	9.92771	5.89489	5.93107	5.9426	8.47976
1	8.77508	8.61574	10.3924	4.7428	8.41526	6.97978	8.65377
0	5.48441	5.77377	8.34437	2.60149	7.1994	5.23477	5.85072
0	4.55166	5.77909	7.67755	2.39531	9.50114	5.91473	5.52659
0	5.68676	5.83741	8.2748	4.66396	8.2308	5.22989	6.32107
0	4.95745	4.65605	8.38607	2.36928	7.70114	5.22016	5.80653
0	4.86009	5.60178	8.33204	3.0741	10.3319	5.53067	5.79059
0	5.22905	4.72384	8.27193	3.05224	9.96667	4.30116	5.55294
0	5.33823	5.37202	7.84233	2.40254	9.78175	5.08061	5.60572
0	5.12931	5.98184	8.81717	3.26305	8.29888	5.42814	6.28832
0	5.36978	5.93115	8.45132	2.68959	7.33617	5.81393	6.30311
0	4.99049	5.08651	7.97719	3.14709	9.4299	5.32605	5.78311
0	5.2719	5.23727	7.85262	2.78488	8.45197	5.52883	6.13407
1	8.55445	7.72127	10.1591	5.71185	7.49392	6.4805	8.54973
1	7.42834	5.09502	8.6213	4.77894	4.42168	5.79056	6.58773
1	7.19997	7.72132	9.5503	3.29569	9.41421	6.85114	7.92673
1	6.61928	6.97658	9.2599	4.20909	9.19964	6.07403	7.42351
1	7.10594	7.93916	9.55823	3.25596	7.07928	5.76121	7.62189
1	7.62387	6.8332	9.51078	3.25257	7.24979	5.7037	7.70447
1	7.81114	6.74676	9.40943	6.85891	5.34868	6.09122	7.38947
0	5.08756	4.99142	7.86367	2.49989	7.22295	4.49073	5.4433
0	4.78272	4.69242	7.6318	2.49406	7.50005	4.85844	5.43848
0	5.21589	5.86216	8.2559	2.31499	9.39421	4.89193	6.21034
1	7.74068	7.7429	9.39597	3.78508	6.85545	6.36631	7.87653
0	5.21657	4.14508	7.55436	2.21203	7.79466	5.43212	5.51687
0	4.96726	5.21011	7.46965	2.38662	8.705	5.70162	5.67626
0	5.17007	5.07991	7.96888	2.63743	9.05168	6.00485	5.63509
0	4.62351	5.06554	7.82884	2.92946	6.80437	5.07162	5.80088
0	5.84899	6.93379	8.70448	3.09616	8.751	5.36351	6.81404
1	5.53451	6.97983	8.43368	2.94211	8.50136	5.88474	6.74529
1	7.86372	8.39652	10.2379	4.76266	6.33453	5.92917	8.15543
0	5.22163	5.6355	7.74774	2.83175	9.88774	5.72871	6.32344
1	7.62757	7.55686	9.00315	2.94034	9.10297	5.00705	8.51264
1	7.50567	8.95762	10.5089	5.15393	5.49171	7.06177	8.52888
1	8.48337	6.8697	9.48125	5.90651	5.22266	6.63498	8.24778
1	7.90228	8.55971	9.41326	4.24727	8.13222	7.82642	8.24441
1	8.9887	7.90739	10.0937	4.09535	5.36686	6.73414	8.65698
1	5.36876	5.34296	9.19958	3.91592	8.89474	5.28853	5.74763
1	9.43889	9.02822	10.2443	4.01644	8.72185	7.73492	9.10763
1	8.59875	8.28389	10.4755	3.45316	4.37761	6.41192	8.55013
1	8.32311	8.0973	9.75059	3.78325	4.0519	8.06705	8.69032
1	6.87581	7.49174	9.15846	3.20586	8.25291	6.54957	7.94747
1	6.13639	7.25511	8.57108	3.58887	5.46617	6.12313	7.26239
1	8.98523	8.49223	10.1363	5.62099	4.80733	6.93161	8.59294
1	6.73388	7.58953	9.70765	6.31875	6.85607	6.01273	7.94035
1	8.40116	7.48537	9.63408	3.42597	4.95191	7.15111	7.58628
1	7.25784	6.53408	9.03945	2.67782	6.2246	4.70543	7.14151
1	7.32863	8.07985	9.92998	5.98226	4.74779	6.0654	8.09425
1	6.75908	7.51595	8.7504	3.89473	8.41011	6.37204	7.58429
1	6.19005	7.93676	9.98498	2.4057	5.11182	6.17166	7.75275
1	6.61397	7.77953	9.43334	2.87725	8.2993	4.83339	7.47341
1	7.8689	8.31813	9.98438	3.69839	5.51335	5.8518	8.24697
1	6.0788	7.04245	8.74535	2.9711	8.63056	4.69093	6.88223
1	7.48015	8.13774	9.98206	3.50995	8.62884	6.93414	8.1597
1	6.40672	7.57558	9.67174	4.33953	9.51866	5.34313	7.79608
1	5.22593	7.17522	8.84091	3.89904	10.4431	6.75132	7.11551
1	7.14207	7.11403	8.99872	3.56013	6.45799	5.42877	7.96695
1	6.8195	7.60775	10.2642	5.18628	5.78266	6.80335	7.67259
1	8.08559	7.94998	10.2748	5.95803	7.99536	6.21794	8.16754
0	4.61788	4.7612	7.61427	3.21717	8.55057	5.18907	5.14208
1	7.14899	7.73503	9.48181	4.49558	7.21258	6.26317	7.59219
1	6.89221	7.43037	10.0219	3.11788	6.89347	6.93382	7.47815
1	7.25603	8.78767	10.04	5.05469	6.32241	6.38722	8.33932
1	7.59164	7.38818	9.95023	3.52378	9.17691	5.47516	7.50181
1	6.39666	5.70483	8.48456	3.49236	3.59817	5.8249	5.95167
0	5.56948	4.96689	8.24572	3.02702	9.50959	5.30361	6.05423
1	6.34443	6.70998	8.72086	2.28174	8.79776	6.2431	7.2244
0	6.08219	5.02774	7.79458	2.46273	7.59481	4.92602	6.23835
0	5.197	5.5324	7.55218	2.50001	6.73015	5.54583	5.85237
1	7.53835	7.40558	9.67542	3.69972	3.84318	6.22348	8.25926
1	6.65313	7.01754	9.007	3.19003	6.8332	6.25724	7.27913
0	5.88958	5.82522	8.01322	2.68992	6.81027	4.31485	6.19455
0	5.30838	5.62025	8.40488	2.37672	9.48234	4.64307	6.06507
0	5.1005	5.10762	8.12296	2.90257	7.1619	4.62768	5.37882
0	5.49513	5.36527	8.17274	2.38711	7.04254	4.49797	6.00153
0	6.43047	5.76834	8.58517	3.10464	9.10692	4.74179	6.15748
1	6.91972	8.03585	9.50632	2.85343	8.68416	5.86389	7.70104
0	5.90017	5.92169	8.46904	3.90022	7.60486	5.8544	5.9485
1	6.68843	6.59065	9.31565	2.48185	9.61355	5.61594	7.252
1	6.22534	6.59673	8.9794	5.22746	6.60484	5.34434	6.34963
0	4.93383	4.91355	7.97174	3.24937	7.33517	5.01634	5.87525
1	7.71716	7.25746	9.92382	3.26137	5.82297	5.48556	7.79196
1	7.0383	6.49186	9.04576	3.40899	6.63897	6.43959	7.47242
1	6.95914	6.79134	9.12817	2.59184	7.72436	6.4061	7.81124
1	4.98761	3.25598	7.64485	2.63421	4.60492	3.69342	4.86613
1	6.94833	7.08692	9.1722	3.11032	6.11485	5.67318	6.64558
1	7.99938	7.90193	10.1847	4.94885	8.36812	6.6434	8.35072
1	7.81729	7.9366	10.0086	3.36126	8.09203	6.33678	8.16964
1	8.22473	7.75484	9.96486	5.13435	4.7891	6.31228	8.44739
1	7.85895	8.29786	10.3303	5.11292	6.7521	5.33549	8.10482
1	7.96047	8.23914	10.3198	4.49879	5.69387	7.25104	8.34848
1	6.15299	8.06218	9.76694	4.3179	9.21224	6.83595	7.7394
1	8.87761	8.95327	10.3339	3.14232	3.74122	7.87922	8.94956
1	7.75057	8.26271	9.88877	3.44969	5.73728	5.83625	7.98027
1	6.81206	6.83089	9.27146	3.06049	6.26285	6.72881	6.82728
1	7.09217	6.78642	9.05494	2.94345	8.06356	5.07362	7.18098
1	7.33025	7.09881	9.53792	2.61001	9.5492	5.27562	7.84163
1	6.67624	7.5075	9.45153	4.48471	10.1397	6.48403	7.44113
1	8.94815	8.45619	9.71374	3.09955	4.64163	8.28203	8.62371
1	6.63358	7.92594	8.60089	4.00687	9.6085	5.65272	7.4829
1	8.88445	7.2026	10.1042	2.44146	6.38655	5.97521	8.67094
1	6.31726	7.90686	9.86584	5.68623	9.23512	5.86961	7.50445
1	7.62676	7.81824	9.3613	4.32637	10.1824	5.17115	7.71942
1	7.91819	7.89228	9.80956	3.4132	7.18744	7.09774	8.2664
1	6.84303	8.38964	9.95585	2.91049	7.17297	7.64973	8.44554
1	6.72291	7.19571	8.42287	3.12727	10.3296	6.38819	7.78137
1	6.93692	7.57294	9.50318	5.2675	8.29833	6.45912	7.6058
1	6.07951	7.69471	9.69183	4.3697	6.35305	6.84537	7.62447
1	8.79774	8.924	10.5601	3.39485	8.73185	7.17209	9.17552
1	5.60274	6.32007	8.6793	2.54141	6.37338	7.07281	7.25916
1	6.41989	7.4647	10.2957	5.90616	8.61687	6.21367	7.58018
1	7.34864	8.24485	9.70873	3.08634	8.97464	5.41492	8.2355
1	7.40287	8.50012	9.54471	4.08036	4.41001	7.35642	7.4324
1	7.26297	8.03557	9.74868	3.53852	6.65557	6.34384	7.99412
1	7.6742	7.84862	10.3623	4.85335	6.11193	6.43476	7.83426
1	6.78795	7.41884	9.32425	3.22208	7.1152	7.0622	7.45918
1	8.51178	7.51048	9.7264	2.58633	8.5576	6.28885	8.08532
1	7.22598	6.85045	9.97206	2.62638	5.62715	5.89762	7.80953
1	7.34517	7.81541	10.2237	3.33026	6.96018	5.5811	8.13883
1	5.62794	4.79961	7.85352	2.96772	6.01013	8.12451	5.9237
1	6.97279	7.44751	10.3857	2.95582	7.98498	7.06756	7.64675
1	8.35589	8.36465	9.93929	4.94816	7.77829	5.64852	8.71341
1	7.16986	8.41021	9.65579	4.11839	5.75767	6.12803	8.09647
1	7.46239	7.6269	9.34297	2.96076	6.15335	6.22049	8.02868
1	7.94079	7.57643	9.68219	3.0172	8.44476	6.27324	7.54179
1	5.32827	5.67104	8.19175	2.46219	8.7571	6.12892	6.48542
1	7.31392	7.04246	9.16879	3.54238	5.79553	6.74026	7.9545
1	8.19692	8.27931	9.97051	3.02642	8.32891	6.69425	7.85943
1	5.48886	7.89408	9.32888	4.1724	6.58891	6.8916	7.18355
1	7.47138	7.64724	9.11426	2.9066	8.18294	6.01782	7.06354
1	7.01618	7.32707	9.0773	3.20232	9.50013	6.74764	7.85079
1	6.25176	7.55014	8.56913	3.56682	6.10604	6.78909	7.02502
1	6.27585	7.3312	9.40791	3.56077	8.11994	6.44529	7.18987
1	5.89597	7.42628	8.95649	4.33444	6.66135	4.85623	6.58653
1	8.1346	7.45942	10.3554	3.7012	5.83578	6.76057	7.58898
1	7.4585	8.58102	9.01465	4.53277	9.27315	7.82449	8.16497
1	7.03573	8.16827	9.3829	4.47387	5.15043	5.03666	7.74595
1	6.8171	8.36458	9.30086	4.56575	7.22159	7.53693	7.80843
1	7.66205	6.46266	9.61961	4.66677	4.38626	6.34462	7.11408
1	5.119	6.35136	8.70628	4.11515	6.01522	5.72611	6.61067
1	6.34544	7.46355	9.82775	3.97793	10.3755	7.40906	7.01791
1	6.90324	8.26662	9.99348	4.53991	7.9701	7.13834	8.19798
1	6.43636	5.96262	9.22008	5.81233	5.56619	6.03675	6.79841
1	6.86821	7.08203	9.27644	3.93692	9.5532	4.85687	7.40515
1	7.57552	8.25944	10.0297	3.81406	5.28902	7.49648	8.36768
1	6.99793	7.3132	9.65221	5.29374	5.93209	6.78658	7.51184
1	7.8948	7.95756	10.3367	3.20684	8.62294	6.51976	8.44868
1	6.53197	7.82284	9.25262	3.97945	8.96374	5.72761	7.67476
1	7.80712	8.0678	9.84992	3.80409	6.69343	6.1841	7.93534
1	6.77318	7.24471	8.52482	2.98979	8.38706	6.96999	7.29797
1	6.45849	7.51618	9.28056	3.81909	5.98686	4.97038	7.04834
1	8.47313	8.72549	10.2557	3.43856	7.15998	6.85733	8.53209
1	6.41362	6.84357	9.00391	3.88214	6.93947	5.72458	7.15854
1	7.67133	8.72196	9.80913	5.39449	6.2634	7.63461	8.49538
1	6.76885	7.68437	9.01631	3.9539	9.95426	7.23727	8.00582
1	6.64057	7.25291	8.85536	2.67785	7.09585	6.34904	7.48849
1	6.89084	7.37581	9.18108	3.06661	8.23878	5.43627	7.89445
1	7.67652	8.63189	9.33722	2.87982	9.00674	7.18271	7.88164
1	8.8853	8.38373	9.99255	6.98089	4.57472	7.96933	8.66464
1	7.20543	6.91243	9.42841	5.76878	5.44062	5.67055	8.46055
1	7.96809	8.10293	10.0319	3.15874	3.621	5.1456	8.3012
1	7.27816	8.55956	9.97937	5.1971	9.15596	6.91811	7.54024
1	7.81059	6.20731	8.78982	2.88158	5.11361	5.43655	6.86268
1	6.5308	7.59315	9.66438	2.94074	8.18519	6.87971	7.88679
1	6.25786	7.2902	9.17436	3.94366	6.96621	6.05062	6.92216
1	8.61932	7.79149	10.5553	3.03845	8.84912	6.54702	8.15262
1	9.35967	8.49245	10.0089	4.78737	3.44925	7.59414	8.368
1	7.16	6.74181	9.26254	2.6689	5.91315	6.06527	6.97851
1	6.85	7.49188	8.83656	3.5988	8.37921	5.65129	7.71395
1	5.73564	7.00739	8.57773	3.19386	8.98125	5.8612	7.24189
1	6.03836	8.29774	9.41461	4.5076	9.65323	6.63094	7.22879
1	7.77475	8.26558	9.77343	3.33415	10.3461	6.85479	8.41589
1	8.0632	8.54655	10.2003	3.85603	7.02867	7.57337	8.45161
1	6.01103	7.34262	9.61745	4.53616	6.21564	6.72297	7.0789
1	8.0955	7.45767	9.75485	3.68562	6.25105	5.99301	8.13373
1	6.95045	6.97621	9.34949	2.98968	6.97208	6.77399	7.17822
1	6.09731	7.43289	8.82247	2.71784	9.97069	6.85379	7.58638
1	6.7464	8.55404	10.1668	5.28575	9.60954	6.57832	7.75046
1	8.19252	8.78334	9.4746	3.35688	5.83286	7.57008	8.19114
1	7.64094	7.84101	10.2009	3.18626	8.82649	7.1555	8.18795
1	7.40726	8.04648	9.59456	2.88821	6.70958	6.18469	8.34611
1	6.33635	6.79734	8.79026	3.4277	6.72608	6.23802	7.39094
1	7.52353	5.25158	9.54783	5.34208	6.00002	6.81988	7.88613
1	7.66266	8.45639	9.99756	3.423	5.51413	7.73118	8.92031
1	6.29128	7.13155	8.88212	3.87264	7.8388	6.24233	7.66159
1	9.49092	8.04816	9.80059	3.08291	5.61264	4.53815	8.25407
1	7.49334	7.01779	9.49629	3.7286	8.49975	6.06184	7.24456
1	8.88317	7.75904	9.40459	3.71677	7.19725	5.80195	8.18109
1	7.39903	8.03185	9.93999	2.91329	5.40245	6.68525	7.79761
1	7.02279	8.74835	9.57435	4.46977	6.40883	7.44558	8.40694
1	7.70407	5.81961	8.83999	3.38389	6.2098	6.42441	6.39191
1	6.70311	6.14102	9.43968	3.48197	7.83016	6.4437	7.41054
1	7.49393	8.4081	9.28877	4.80692	7.20998	8.16432	8.11913
1	7.42012	7.86747	9.9965	4.65572	7.00038	6.23997	7.77316
1	8.35385	7.36502	9.18863	3.04451	6.03094	5.58129	7.45535
1	6.73422	7.08986	8.91779	3.22953	6.54677	4.98749	6.75891
1	5.65808	7.96541	9.29289	4.43059	7.57005	6.71037	7.1398
1	7.21352	7.82545	9.77322	4.13631	5.14004	6.82	8.43758
1	7.28927	7.59563	9.81602	3.83701	8.64335	6.19779	8.17905
1	8.07632	7.06457	9.10557	2.88452	8.5013	6.02221	7.03979
1	6.42661	5.84701	8.18603	3.14715	8.74859	5.51873	6.45112
1	7.84566	7.6866	10.1584	2.69622	5.33805	7.21187	8.46994
1	5.68658	5.86411	8.33519	3.04631	8.91232	4.90727	6.83891
1	7.66283	7.53912	9.35127	5.75538	4.83804	7.32236	7.82843
1	7.14559	7.38839	9.5267	4.13027	7.17473	6.98882	7.74586
1	7.62795	7.94822	9.89791	3.96665	7.39808	6.01683	7.9449
1	5.38974	7.89871	9.67414	3.08432	6.32207	6.06769	7.0938
1	8.5351	8.33815	10.1165	5.07322	4.73678	6.93698	8.38556
1	6.80085	5.13626	8.03863	3.24475	4.02346	5.2897	5.51487
1	8.28527	8.23376	9.87145	5.05769	4.58933	7.86394	8.22657
1	7.92216	7.95114	10.0247	4.1325	5.5515	7.6809	8.53658
1	7.98831	8.71421	10.2052	4.1403	5.32557	7.24337	8.80034
1	5.61361	5.3407	8.56231	3.12584	6.18933	4.34224	6.3655
1	6.22016	8.08428	9.36439	3.6546	9.13592	7.13238	7.83658
1	7.63799	7.92769	9.79838	4.12693	4.84015	5.94148	7.98078
1	7.12468	7.4137	9.22619	3.45808	8.17039	7.40572	7.50982
1	9.03638	7.99312	10.1924	3.9107	6.70121	6.41913	8.66946
1	6.39008	6.32049	8.75234	2.96437	6.97677	5.46048	7.32119
1	7.42133	8.15653	9.90393	2.96427	4.77453	7.50009	8.55341
1	8.16671	7.6446	9.38203	3.40316	8.24907	6.8582	7.04172
1	7.32605	8.33241	10.3279	3.86317	5.86614	7.39271	7.9718
1	7.26157	8.32431	10.1592	3.39326	9.53327	6.96582	8.57252
1	7.98801	6.71698	9.48038	3.68765	6.65065	5.76099	6.90886
1	5.60656	7.1673	9.39354	3.60051	5.97842	5.32013	7.26734
1	6.35097	6.9441	8.51392	2.61914	10.3727	6.50131	7.333
1	7.78621	8.52336	10.156	4.54813	3.32824	7.60724	8.56338
1	6.47087	8.32701	9.29635	3.48021	9.03698	8.02301	8.13125
1	7.85369	8.44409	10.1319	3.07748	6.97155	7.21167	8.17886
1	7.90923	8.63517	10.0294	3.31296	8.77849	6.73022	8.08833
1	5.44789	7.37083	9.07083	3.04474	8.9158	6.75789	7.53168
1	7.54012	7.89696	9.56837	6.17713	5.14257	7.37974	7.83
1	7.41251	7.43891	9.7959	4.26833	4.49094	6.21236	7.80827
1	6.74448	7.91688	9.67985	3.44765	5.33052	6.7818	8.11267
1	6.42169	8.14267	9.70512	5.9124	6.21657	6.13688	8.16316
1	6.61819	6.9554	8.87396	2.75609	7.39268	6.3732	7.30616
1	7.71646	7.07826	9.77835	3.08674	6.60294	5.51476	7.74603
1	7.01186	8.1235	10.0416	3.69435	8.19262	7.3635	8.33579
1	8.16895	7.81193	10.0355	4.00176	6.92673	6.28387	7.64076
1	9.21101	7.526	9.82279	2.58191	5.78505	7.3236	8.47994
1	7.58088	8.52586	10.2933	4.5066	7.67726	7.21501	8.47375
1	7.1129	7.93	10.1661	3.77182	7.64043	6.54854	8.21709
1	8.15573	8.14773	10.0388	3.35109	5.29507	5.64707	8.1173
1	6.36097	7.84597	9.71747	4.65723	10.3439	6.58867	7.74903
1	6.12998	4.36549	8.07898	2.96484	5.26068	4.18972	5.16421
1	7.26505	7.78888	9.56888	5.93561	3.62522	6.90631	7.57092
1	7.75768	8.07613	9.73103	3.98402	5.52128	6.70448	8.1925
1	8.07243	7.40891	9.892	7.53479	3.80943	6.60747	7.63819
1	6.9505	8.3123	9.35293	3.22294	5.09308	8.28422	7.79527
1	7.67841	8.22367	10.3309	4.00091	9.05882	7.35168	8.08246
1	7.43753	7.66082	9.91722	3.50036	5.96145	5.97903	7.75322
1	6.98467	7.45093	9.30528	3.3881	5.43951	5.70554	7.31473
1	7.45561	7.90206	9.85087	3.13197	5.17546	6.99103	7.614
1	6.6622	7.75373	9.24302	3.54787	6.02793	6.24423	7.56777
1	7.28757	7.66481	9.93943	3.95509	8.33505	6.1531	7.67449
1	6.84957	7.42318	9.74015	3.75872	8.21848	6.90556	7.94241
1	7.06464	8.6695	9.62382	4.30106	5.47142	7.54544	8.00359
1	6.79847	7.64314	9.603	3.41715	7.37857	6.77581	8.0149
1	6.68477	7.97093	9.58574	4.32685	8.81554	7.30735	7.25719
1	7.37043	7.52511	9.35958	2.61114	8.47865	6.59207	7.64696
1	8.11202	7.91939	9.9602	3.09656	4.48148	7.1728	8.51536
1	7.12462	7.3255	9.06361	2.82005	7.85638	5.5784	8.1297
1	7.97609	7.64875	9.35646	4.08772	5.34209	7.13184	8.13011
1	5.76694	7.63827	9.34781	5.29897	7.60615	7.15498	7.27606
1	6.9053	7.79467	9.27218	3.29393	8.18891	5.28082	8.10818
1	7.81844	8.27545	9.63099	4.22975	5.67405	5.95373	8.11109
1	6.9765	7.39175	10.0398	4.75599	6.36251	6.1493	7.34023
1	6.86142	7.79203	10.3197	4.61489	5.84207	6.67677	7.99848
1	6.78276	6.68996	9.90352	4.0047	8.58867	5.85701	7.47154
1	7.93448	7.77074	9.67514	6.10365	7.59301	6.87415	8.2022
1	6.33478	8.18397	10.0255	5.49875	6.66393	6.49401	7.46594
1	6.83072	6.31735	8.39194	4.12394	6.25261	5.40458	6.82387
1	8.35973	7.94239	9.99817	6.75061	6.40825	7.30186	8.34492
1	6.16451	7.88377	9.93285	4.98911	6.3035	5.95255	7.57769
1	7.38391	7.73614	9.86006	4.80521	4.96141	7.07327	8.11971
1	6.56921	6.6006	8.77636	2.97763	6.85653	6.35305	6.88177
1	6.89028	8.49504	9.78015	3.95155	6.62148	6.70006	8.4054
1	8.26262	7.38514	10.2805	3.70701	8.46765	6.44189	8.08439
1	6.93227	7.41751	9.72112	2.97597	3.26146	7.9202	7.56304
1	7.6715	7.84947	10.6411	3.91542	8.51423	6.5411	8.11039
1	7.07403	8.45533	10.0935	3.86771	5.85513	5.84594	8.01441
1	8.61203	8.00753	9.5967	3.28999	8.75296	7.16889	8.46036
1	8.50108	7.55922	9.89064	6.7505	6.52244	7.2128	7.94099
1	7.47675	7.80397	9.82161	3.69948	5.50329	6.71132	8.15709
1	6.1039	7.01599	10.0723	4.30636	5.56624	5.91695	7.18935
1	7.92227	6.36648	9.04617	3.06206	8.66661	6.21396	8.02667
1	7.25545	4.77433	8.73823	2.54823	6.79445	4.00105	6.72341
1	8.06888	7.63948	9.67494	2.53214	3.71388	5.31488	7.65208
1	6.76662	6.82368	9.14995	4.25442	7.43077	5.99092	7.19596
1	6.62283	7.60482	10.1242	4.09239	8.74322	6.18247	7.77462
1	6.84429	6.84718	8.2099	3.90366	8.90184	6.24631	7.89069
1	7.22761	8.07829	10.0678	3.91023	8.70644	5.57278	8.03005
1	8.15619	7.88904	10.1933	3.3226	4.38314	6.65157	8.28478
1	7.61555	8.42284	10.2174	4.24083	3.88201	7.21946	8.32761
1	6.12637	8.19177	9.95456	4.24573	8.96606	6.48838	7.05985
1	8.1892	8.55855	9.98248	3.11326	6.86438	5.41397	8.51783
1	6.74656	8.24517	9.73123	5.26844	7.49623	7.03461	8.39014
1	6.76093	8.6346	9.78882	4.33088	6.92731	7.21694	7.81609
1	6.65987	6.78186	8.79465	5.32803	6.81905	5.83566	7.13207
1	6.81109	7.52881	8.63246	2.74506	8.72723	6.72291	7.41175
1	9.50628	8.38972	10.1854	4.96939	6.54977	5.91245	8.7626
1	6.85241	8.31257	10.0697	3.45082	8.67957	6.64755	7.93666
1	6.73085	6.14254	8.85523	3.55608	7.69501	4.58997	6.34974
1	7.25239	8.14844	10.2388	3.91199	6.39517	6.91775	8.08235
1	6.85167	7.08801	8.84154	3.03478	8.73038	6.24488	7.17032
1	8.31961	9.5802	10.2986	4.54541	5.02057	8.05944	8.60595
1	7.28741	7.96701	9.20173	3.28487	6.47592	7.03885	8.25546
1	8.56925	8.11917	10.2345	5.42554	4.14849	6.63737	8.52528
1	7.11389	8.64881	9.58304	3.89561	6.20457	6.81543	8.14938
1	6.89266	6.90849	9.06012	3.06213	6.60459	6.25482	6.70683
1	5.71104	6.55832	8.66219	3.10381	6.04389	6.08971	6.58684
1	8.20785	8.40836	10.4832	4.21187	7.90889	6.78501	8.42722
1	7.9299	7.16556	9.74741	2.98821	4.0411	6.05312	7.58215
1	6.23603	7.55721	9.1392	3.72806	6.68785	6.58964	7.5754
1	7.41997	8.85991	9.8675	3.13365	6.792	6.34635	8.46518
1	6.54223	6.85309	8.69276	3.40673	7.10216	6.16422	7.25572
1	5.90473	7.97178	9.58452	3.59831	7.03221	6.90284	7.51245
1	7.7496	8.2622	9.69646	3.28068	6.53216	6.97966	7.60493
1	7.96942	8.09057	10.3927	3.1797	6.64337	7.49728	8.14416
1	6.58626	8.02039	9.30796	2.69078	9.64547	6.87958	7.4158
1	8.19255	6.6444	10.5504	2.84404	6.4891	5.58509	8.18145
1	8.14478	8.05311	9.95236	3.44221	8.08053	7.11249	8.06234
1	6.64266	6.20242	8.65748	4.18992	9.11159	6.15142	7.65489
1	5.81762	7.42697	8.78481	3.96286	9.12631	6.63984	6.78983
1	7.9007	8.06173	10.0761	3.57914	3.29582	6.65036	8.71946
1	5.84725	6.80382	8.27012	2.88266	7.15473	5.96232	7.13399
1	6.72219	6.96296	8.60533	2.5698	8.5798	6.56539	6.62756
1	6.50376	7.98037	9.6016	4.17857	5.76076	6.10866	7.56571
1	7.63067	8.47716	10.0942	3.69747	7.70953	5.7022	8.41289
1	7.45965	7.31961	10.1914	4.62724	5.53536	5.64686	7.78412
1	6.0074	4.53824	8.41578	3.09565	8.8898	4.93342	6.08228
1	7.73951	8.44547	10.5277	4.37375	6.16901	6.6855	8.24347
1	7.68122	7.08732	9.24778	3.88123	5.34114	5.72891	7.38019
1	8.16702	8.6276	10.2336	3.95854	6.25246	7.85408	8.21598
1	7.13253	8.29271	9.62863	3.29403	4.18362	7.54366	8.49763
1	7.48647	7.81544	9.78103	3.95671	8.06541	7.08972	7.79506
1	6.14094	8.48929	9.35479	6.02791	6.12996	7.34878	7.17728
1	8.54281	8.48064	10.0715	5.56506	5.22845	7.8176	8.76237
1	7.26926	7.56779	9.39394	3.61418	7.87913	6.88377	7.83596
1	7.33785	7.17777	9.58535	6.48547	6.74911	6.86933	7.92745
1	5.51783	6.0443	9.45553	6.73959	8.84407	5.19622	6.21604
1	7.24407	8.19294	9.77268	5.11617	7.86717	7.54449	8.23516
1	8.11041	6.88988	9.85157	5.5822	3.20437	6.58466	7.38769
1	8.46413	6.86864	9.99435	3.07405	5.36273	6.13949	7.92555
1	8.64579	7.0159	9.44012	3.57132	3.83429	5.84182	7.45222
1	7.73812	8.39912	9.57985	4.13529	6.71647	6.91961	8.4419
1	8.26677	9.00605	10.2736	4.76954	7.08004	6.31925	8.57621
1	6.91985	7.22169	8.85569	3.24055	8.74328	7.23769	7.74339
1	7.12272	5.8152	8.89817	3.47179	6.42969	5.22928	5.79182
1	8.70745	8.28687	10.6945	3.31828	3.02616	6.09009	8.69771
1	7.10709	8.17711	9.49533	5.28742	8.95874	6.82061	7.75419
1	6.28856	6.80798	8.91958	2.99903	6.67629	6.75521	6.88458
1	8.64353	8.69019	10.192	3.18973	9.1908	7.45562	8.67878
1	6.70102	6.63533	8.9688	5.64099	8.6785	6.78889	7.35926
1	7.20585	7.56481	9.72089	5.60178	5.15963	7.14806	7.97461
1	6.76163	6.65271	8.57842	3.39716	5.54537	6.27217	7.45002
1	8.2778	8.40318	10.0365	5.46617	5.62413	7.14572	8.3116
1	7.28549	8.08275	10.0826	4.89514	5.59511	6.52782	8.28458
1	7.78002	8.00712	9.5946	4.07531	7.77617	8.18456	8.31953
1	7.60116	7.57442	10.3601	3.45723	4.00509	6.40804	8.57861
1	7.78722	8.60159	9.84562	3.91351	4.83127	8.03517	8.66237
1	6.01356	7.73733	8.87641	3.23612	8.60615	7.12183	7.18057
1	7.6145	8.66072	9.85173	6.78811	5.94275	5.99247	8.26557
1	8.17769	7.93903	9.50374	3.29417	5.28735	6.18741	8.35458
1	8.5576	7.96613	9.70219	3.71632	6.59793	5.82024	8.39043
1	8.47984	8.43229	10.2947	6.24033	4.99234	7.61105	8.4851
1	6.96945	7.73902	9.91566	2.91184	5.07295	6.57173	8.15252
1	7.13069	7.70123	9.35097	4.54576	8.74711	6.50308	7.83207
1	6.86572	6.49143	9.18737	2.60488	6.99774	5.03904	6.73426
1	7.00027	8.4457	9.56481	3.48291	6.44953	6.12676	7.52045
1	7.01368	5.53709	9.08501	3.6694	8.14375	5.63697	6.9744
1	6.17773	7.01013	9.40486	4.06442	6.72787	4.63747	7.05568
1	8.14172	8.88514	9.99069	3.83845	6.74483	7.28426	7.98798
1	7.2993	8.02416	9.60569	2.81722	8.23321	6.38056	7.74401
1	7.86601	8.57612	10.027	3.81821	9.00363	6.67681	7.76376
1	7.84682	8.06058	10.2353	4.33815	6.02702	7.44055	8.48841
1	6.92971	8.56925	10.0258	3.63218	8.61492	7.70542	8.4277
1	6.50342	8.31134	9.66084	2.6325	7.7939	6.35123	7.63254
1	6.3797	7.42077	8.84511	3.76699	7.46176	6.57349	7.5484
1	6.76208	4.64409	8.39597	5.50238	3.97302	5.99602	5.67365
1	6.87779	6.37182	8.72909	2.34854	7.25398	5.52267	5.84232
1	6.98262	7.91158	9.0162	3.46427	8.46622	5.28398	7.86091
1	5.56078	6.57472	8.60953	3.81795	5.84751	5.58381	7.13116
1	6.95274	7.98261	9.19155	3.40867	6.81089	5.9308	7.78344
1	7.31113	7.77547	8.917	3.35178	8.54708	5.97779	7.30559
1	8.48798	7.94403	9.80455	3.01508	4.65897	8.03508	7.83777
1	7.81285	8.10375	9.95067	4.97404	9.56993	6.07	8.19588
1	6.07817	7.24901	8.53321	3.49809	8.62203	7.1251	7.08782
1	7.15558	8.36688	9.7852	3.59541	8.6275	7.36659	8.4701
1	7.76542	8.50251	10.1809	3.84894	4.87679	6.79576	8.40911
1	6.1972	4.77173	9.46527	5.18191	6.78336	7.00543	6.97965
1	8.30601	7.28727	9.05874	2.80905	8.75638	4.71598	7.96148
1	8.47634	7.9029	10.2089	2.42896	6.25711	6.02812	8.38296
1	7.59713	7.685	10.1802	3.56269	7.12567	5.97835	8.09067
1	6.37748	7.24241	8.4348	3.62085	9.55724	6.97828	7.22586
1	6.15306	6.70151	8.67507	3.94279	7.30108	5.84332	5.83606
1	7.28594	6.67229	9.43134	3.43743	4.32852	6.8173	7.4579
1	8.97153	7.6652	10.083	3.63421	8.09423	6.36606	8.66954
1	7.25436	7.47142	9.93032	4.55	7.91708	6.79067	7.75301
1	7.09072	7.99407	9.17747	4.818	4.86749	5.58893	7.29891
1	6.55332	7.46865	10.1295	4.93089	5.41496	5.65702	7.56354
1	7.13856	8.61755	9.62894	5.55801	5.93581	6.37453	8.23579
1	6.19851	7.27592	9.01606	3.88097	9.34995	5.28371	6.61172
1	7.72366	8.07349	10.0041	6.35514	6.67596	7.77512	8.2941
1	7.75568	7.99661	9.70563	3.53246	9.20452	6.18064	7.97859
1	8.7349	8.05783	10.2107	7.12254	6.84855	6.80956	8.69812
1	7.32354	7.96132	9.67959	2.8773	7.8644	7.3812	7.82343
1	7.25246	5.25567	8.02033	3.17866	7.2134	5.00542	6.17673
1	6.44466	7.13027	9.57658	3.38938	9.06966	6.93194	7.16828
1	7.4524	8.3377	9.55183	3.02338	8.07739	7.37974	7.85564
1	8.69327	7.27963	9.57356	4.6621	7.59732	7.46447	7.9982
1	8.14068	8.09721	10.3183	3.47373	5.21409	6.27826	8.69292
1	6.52379	7.07441	9.25308	3.34801	8.33919	6.9791	7.64432
1	7.73595	7.40644	9.93297	3.03996	7.58838	6.02904	8.00465
1	6.00781	8.23321	9.87568	6.0164	5.88866	6.69366	7.06945
1	8.07651	7.86518	9.7526	5.42633	7.28469	7.82959	8.44233
1	6.22562	6.2981	8.27829	2.99319	6.3217	5.90014	6.65797
1	7.85696	7.94155	9.53612	6.19056	6.70568	7.53652	8.13984
1	7.58347	8.51636	9.8429	6.00727	5.24986	6.72435	7.96649
1	7.68585	8.51801	9.37687	3.73076	5.73301	7.07631	8.42017
1	6.55354	8.88343	9.51983	4.53372	6.64446	6.81234	7.75515
1	6.92474	7.3252	9.01539	3.07258	7.16805	7.35808	7.34806
1	7.27188	7.40742	9.78624	5.89554	7.98636	6.33572	8.10022
1	7.27481	8.4793	9.84528	5.84934	8.71652	6.36234	8.15758
1	6.59947	6.69656	8.57913	2.80317	8.73014	5.87952	6.87429
1	7.12686	7.43963	9.37435	2.78697	4.83542	6.31064	8.19399
1	7.53007	8.05265	10.0217	3.03318	7.03279	5.89351	7.68595
1	7.37794	7.79789	9.96491	3.05814	4.21413	5.51207	7.66108
1	7.15169	6.785	9.14783	3.26773	6.41437	5.3111	7.16458
1	5.76026	5.58705	8.18395	3.19777	8.61999	6.34182	6.57625
1	6.39794	8.18141	9.80072	5.65398	7.85939	6.34582	7.55872
1	8.3808	7.76117	9.98318	6.51597	4.61455	5.78901	8.62482
1	7.426	7.58394	10.3935	3.13631	4.93077	5.53049	7.98768
1	7.45311	6.61055	9.19715	2.78069	7.94457	6.40315	7.36583
1	6.72697	6.8558	10.2515	3.84022	7.51588	5.91485	7.40636
1	6.69071	7.39771	8.98709	5.07278	6.55406	6.75794	7.66991
1	8.71915	8.47836	10.1802	4.66756	8.08416	7.30435	8.44531
1	7.47985	7.19182	9.7048	4.00386	8.161	5.85543	8.22736
1	6.75341	8.85881	9.98126	3.99113	8.54261	7.17451	8.17898
1	5.79259	7.35535	9.48831	4.15406	10.2971	7.67521	7.55839
1	7.37134	7.99018	8.94111	3.4414	8.9011	7.34857	7.79829
1	8.37857	7.43398	9.43729	3.76799	8.34776	6.00718	7.92219
1	7.66159	8.03636	10.0355	3.85494	8.86793	6.73309	8.45495
1	7.48119	8.87927	10.1349	3.18661	4.87089	6.95762	7.99673
1	7.42954	7.167	9.15584	3.16808	5.58409	7.59939	8.29711
1	8.22862	9.22522	10.0527	4.03587	8.57007	7.03766	8.75874
1	6.96139	7.78826	9.09679	4.60736	8.19082	6.70645	7.60315
1	8.49153	8.68979	9.39128	4.2985	8.97244	5.81115	8.26755
1	6.61929	7.2564	9.54456	3.41028	4.94214	5.94406	7.7882
1	6.70885	7.64706	8.87486	3.23229	8.97328	6.07037	7.4715
1	7.00179	8.31588	9.99073	5.6528	9.89528	6.69259	8.03272
1	8.24238	8.22074	9.77461	3.74883	5.74946	8.21307	7.97951
1	7.28313	7.70633	9.20317	3.26152	9.53661	6.58563	7.58774
1	6.95864	7.29384	8.75872	3.21941	8.77237	6.16949	7.20517
1	7.02683	5.28357	8.73391	6.07035	3.61561	5.70889	5.64599
1	7.67837	7.47357	8.94099	3.92706	8.93848	7.32424	7.58195
1	7.64268	7.73555	9.34613	3.52454	4.01762	7.5038	8.23724
1	8.17675	7.94802	10.2421	3.34272	7.05965	6.29617	7.82586
1	7.69642	8.6542	9.7428	5.47957	7.38083	7.32725	8.43594
1	7.71034	9.02987	9.96731	3.12052	9.21508	7.40592	8.13652
1	6.63236	6.76638	9.63448	2.99607	6.74121	6.22878	7.21078
1	8.8871	8.49519	10.176	2.81317	8.64857	6.4932	8.66344
1	6.22195	7.38981	8.69656	3.13682	5.99338	6.39265	7.21639
1	7.78106	7.18115	9.14321	4.40979	6.4138	6.32927	8.17053
1	5.60931	6.77159	8.87078	3.94142	8.05199	5.24223	6.53361
1	4.70727	5.9653	7.94921	2.872	7.72937	6.52276	6.52539
1	7.40857	7.3771	10.3099	4.85456	8.30966	6.35765	7.53205
1	7.34557	8.12778	10.3336	4.81206	6.26231	6.5197	8.00662
1	4.71848	2.50834	6.45507	2.60853	3.25208	6.55543	4.37734
1	7.88419	7.54636	9.64598	3.2013	4.86589	5.09233	8.14644
1	6.70345	6.63038	9.53868	3.18976	5.8302	5.50006	7.53767
1	6.87537	6.99923	8.88447	3.08933	6.32324	6.60534	7.04152
1	6.72493	7.06374	9.44012	4.75977	4.71028	5.94583	7.32064
1	7.43782	7.72438	9.88742	5.10788	7.73086	5.89023	8.40377
1	6.56381	7.76909	10.1147	3.99194	8.60611	6.79192	7.41647
1	9.15454	7.98092	10.461	3.07131	7.66815	5.47674	8.7025
1	7.43626	7.52761	9.24656	4.59195	5.25109	4.62142	7.18059
1	7.20034	8.40295	9.9662	3.84632	7.7095	6.90351	8.41944
1	6.85282	7.77758	9.80033	3.66322	9.12366	7.28619	8.74125
1	7.56201	9.05376	9.82674	3.23107	4.71084	8.00033	8.69898
1	5.7364	6.93173	8.84455	3.24089	6.738	6.59311	7.08512
1	6.6933	7.8993	9.41799	2.61018	8.35563	6.8158	7.83529
1	8.04837	8.44469	9.74949	3.05494	6.00169	5.43261	7.94479
1	7.10135	7.40586	9.97921	3.70079	5.63547	7.08016	8.27839
1	7.55766	8.27921	9.67346	3.5277	5.74705	6.77686	8.12982
1	7.18018	8.38358	9.79919	2.67306	5.92276	6.92965	8.59429
1	6.11911	6.78963	9.72791	5.63013	6.82683	7.55272	7.48346
1	6.4515	7.91567	9.23432	3.154	9.93455	7.14977	8.08305
1	7.26741	8.43354	9.96248	4.03891	8.88182	6.10328	8.04553
1	6.84747	7.68137	9.12055	2.88515	4.2033	5.95066	7.74146
1	6.54901	6.53134	8.4763	2.17756	5.80874	5.84114	7.39258
1	7.28396	8.19865	9.9219	3.36458	7.71853	5.41694	7.72021
1	5.96394	7.76331	9.71494	5.1919	10.2287	6.47663	7.5899
1	5.5218	8.11573	9.77908	4.71125	9.35598	6.74945	7.13396
1	7.74254	7.894	10.1941	3.73907	8.78477	5.93249	7.73729
1	6.62729	6.8771	8.77251	3.66069	6.67746	6.10706	7.29414
1	7.42853	7.91997	9.5083	6.81387	4.33171	7.2989	7.98251
1	7.69463	8.42028	9.83085	2.94573	6.82135	6.80838	7.48651
1	7.52524	8.01643	9.48304	3.2128	7.34123	6.733	8.04312
1	6.07708	5.68851	8.44484	2.96394	6.44619	5.81521	6.75051
1	5.84755	6.41418	8.29662	3.26011	7.5613	5.5513	6.87646
1	8.18791	8.60435	9.95491	4.36772	9.47612	5.8823	8.26737
1	7.87582	8.38291	10.0897	4.99931	4.56013	8.18574	8.45945
1	6.85724	6.61097	8.09147	3.41648	9.23874	5.75111	6.47968
1	5.84767	7.89522	10.0397	5.41024	10.524	6.14614	7.8191
1	9.05711	8.74328	10.1501	4.2616	4.33692	8.04973	8.59814
1	7.91804	8.21789	9.82262	3.34926	4.97404	7.24116	8.39522
1	7.6494	8.07128	9.35684	4.33665	6.8001	7.22907	7.894
1	6.52922	7.78965	9.36638	3.52164	10.3333	7.17773	7.20329
1	6.03547	6.82962	9.1226	3.58646	6.30669	6.93929	7.58729
1	6.63012	7.05251	8.869	4.23623	8.59459	7.22727	6.89781
1	7.14594	8.47564	9.42423	3.50808	6.45556	7.83453	7.99527
1	7.78381	7.79663	9.84487	3.11104	5.95429	6.45479	7.69716
1	6.908	8.6611	9.88279	4.35111	7.71853	6.75042	8.80147
1	6.75986	7.23353	9.46195	5.4681	7.87057	5.6892	7.60831
1	7.65598	7.23314	9.79339	3.99496	8.46416	5.98757	7.29571
1	7.81609	7.30042	10.0762	3.22063	3.37437	7.03564	7.9946
1	6.84658	7.91685	8.94675	3.42296	7.52383	7.18704	7.79769
1	6.7179	7.04615	9.04199	2.62326	7.25458	5.79651	6.45231
1	8.3068	8.88399	10.0502	4.18138	8.65562	7.61173	8.44169
1	8.64106	7.90117	9.63281	2.90069	4.90506	7.64439	8.52301
1	7.67006	7.35825	9.88041	4.33893	5.14697	5.85944	8.16871
1	8.35633	7.77414	10.1149	5.93001	5.03483	4.98166	7.91165
1	7.46505	7.5911	9.60011	2.55193	7.80657	5.02286	7.78612
1	8.00166	7.58359	10.2298	3.38026	5.24146	5.66811	7.87519
1	8.62541	8.07012	10.1959	6.27174	4.61637	7.24555	8.54653
1	7.99968	8.05506	10.1353	3.61168	6.03009	7.01786	8.64462
1	7.62653	7.48736	9.28172	3.85771	5.74235	6.47162	7.50944
1	7.11801	7.66504	9.33764	3.01174	9.91457	7.02423	7.76107
1	6.63265	6.69876	9.47045	3.13817	4.44344	6.55641	7.07903
1	7.02937	8.02164	9.55932	2.60723	5.78434	8.01362	7.53777
1	6.95203	7.65841	9.91415	2.90905	6.07041	6.59299	8.11731
1	6.02296	6.891	8.89122	2.82306	8.92202	5.4691	6.68532
1	8.19499	8.23276	10.5805	3.86286	5.3623	7.22711	8.3417
1	6.50492	7.92075	9.50738	3.41232	8.43452	6.51201	7.77319
1	6.79676	7.38987	9.97382	3.80304	4.99123	5.92845	7.84834
1	7.97139	8.0439	10.0384	5.59756	6.18048	6.54985	8.52093
1	7.2287	7.96779	9.61144	4.03254	9.04279	5.62532	7.52322
1	7.50064	8.0313	10.0261	3.30455	8.09487	6.24461	7.36076
1	6.11783	6.11314	8.90526	2.79392	5.04162	6.07912	6.41216
1	7.28664	7.559	9.62513	4.47572	8.67167	6.35655	7.28004
1	6.71407	7.58131	9.67194	4.01721	6.28518	6.72619	7.64587
1	6.61083	7.83488	8.9306	3.01337	8.41033	6.5246	8.25508
1	9.74125	8.47621	10.3956	3.31325	4.90036	6.08903	8.41175
1	7.12501	8.50273	10.3753	5.12424	6.60539	6.65807	7.39738
1	8.68725	9.07011	9.71168	4.05331	3.57736	7.9173	8.43908
1	6.77843	7.76657	8.87519	5.1004	9.01374	6.90868	7.35989
1	7.52027	6.82357	9.00076	2.73663	9.32388	6.11783	7.86212
1	8.27496	8.93189	10.0998	5.75118	8.04253	7.83072	8.40157
1	7.59703	8.24017	10.2626	3.62931	6.98585	6.59311	8.18618
1	6.70766	7.33034	9.51854	3.58734	8.79986	5.76101	8.05717
1	6.08196	6.00608	9.32433	7.46887	4.02103	5.0704	6.46268
1	5.22222	7.81067	8.92884	4.08674	8.72679	5.65107	6.63457
1	8.43095	8.78848	10.0839	5.84287	4.24373	6.45528	8.50365
1	5.59091	5.57074	8.13567	4.53129	8.31449	5.00268	5.6889
1	9.14287	7.3715	10.0784	2.49479	7.96786	6.33952	8.17303
1	7.16596	7.93591	9.32618	3.65657	8.93156	5.33946	7.5088
1	7.3828	8.30451	9.58263	2.4127	8.42313	7.54343	8.31986
1	7.90671	7.20694	10.0001	3.5175	7.03399	6.11269	7.74477
1	7.85583	7.87247	10.08	3.22899	8.20285	7.13673	8.48444
1	6.53762	6.69053	8.43425	3.45397	6.43122	7.27543	7.87323
1	5.98996	8.22797	9.72542	4.44067	6.63403	6.50496	7.52589
1	6.4103	7.1156	9.09061	3.62087	7.23707	6.31286	7.71338
1	7.95449	8.40706	9.78163	5.24962	7.82949	6.73441	8.14865
1	7.02328	7.70798	8.55428	2.9237	8.74326	5.66578	7.31516
1	7.63493	7.06876	10.5883	4.84686	4.41609	6.36729	7.85824
1	7.37219	7.58935	9.14845	3.80075	4.39424	6.13679	7.13919
1	5.61373	5.99141	8.57193	4.72899	7.96743	5.67581	6.85854
1	7.80832	5.45361	8.89411	3.56795	3.58866	5.18542	6.24924
1	6.69969	4.74944	9.05551	8.36044	3.76476	4.62377	6.19927
1	5.58482	6.78681	8.79814	3.57285	9.21943	7.03851	6.5806
1	8.07852	8.39666	10.3713	4.65211	8.33267	6.74153	8.53713
1	8.2737	8.72017	9.74946	2.96395	5.56913	6.65928	8.39013
1	6.37128	6.74102	8.47089	2.57688	9.15909	5.55426	6.06296
1	7.48268	8.00481	9.47261	4.1198	5.84457	7.44088	8.18646
1	9.35195	8.23752	9.85581	2.61335	7.11017	5.32982	7.86342
1	8.79208	8.49751	10.1315	5.01454	4.03617	6.88275	8.66581
1	7.7574	8.40019	9.9451	4.76523	8.257	7.89545	8.56297
1	5.87013	7.01406	8.28085	3.15247	8.9899	6.81466	6.87468
1	7.59238	8.14519	10.0147	7.44994	5.61287	6.54903	8.24957
1	6.57577	7.58254	9.84431	3.00698	4.33207	6.65921	7.67123
1	7.49367	6.73775	8.87997	3.35971	8.90074	7.15269	8.00112
1	6.38774	8.05558	9.54487	3.84351	5.65936	6.42311	7.69097
1	7.25099	7.4354	9.23016	3.60991	8.95783	4.47685	7.81084
1	6.74127	6.78819	9.16549	3.75493	6.50258	6.1711	6.96117
1	7.30536	7.36722	9.95899	3.03615	9.06628	6.12305	7.98544
1	7.26038	8.17256	10.1825	5.20369	8.8668	6.2749	7.95899
1	7.74283	7.62317	10.3232	5.67632	6.24838	6.06706	7.84825
1	6.9184	7.45704	9.09967	3.08484	4.80959	6.51457	7.38227
1	8.19253	8.40048	10.1536	3.76619	5.08281	7.70248	8.63483
1	9.03245	7.62016	9.99386	3.29824	3.88685	6.02518	8.17144
1	7.59622	7.4317	9.92337	2.87138	9.17094	5.89023	7.38067
1	6.92567	6.94718	8.93884	4.16506	7.58312	5.42781	7.73852
1	7.05439	7.50819	9.49043	3.08406	6.70772	5.85455	7.47387
1	8.7082	8.54237	10.1301	5.90223	5.18771	7.34464	8.62256
1	6.80253	8.26916	10.1376	4.45756	8.92471	6.10106	7.757
1	7.32254	8.63065	10.4607	4.3291	9.81779	6.3196	8.64738
1	7.39071	7.51387	9.35245	3.0664	5.11995	5.98865	8.33245
1	6.85982	8.25764	10.1702	3.59183	7.38969	6.9097	7.84173
1	7.71831	8.06977	9.55111	3.41607	9.30868	6.93954	7.64753
1	8.07298	7.83198	9.14104	3.77424	5.38384	6.80377	7.5059
1	7.82267	8.43919	9.92507	4.67977	8.53009	7.44803	8.30289
1	7.92466	8.59141	10.3405	4.10734	5.24998	7.21533	8.32991
1	7.87008	7.79027	9.59287	2.86044	5.12941	7.45323	7.87016
1	6.69184	7.41778	8.79809	4.29586	8.01759	6.76234	7.66813
1	6.68878	6.04764	8.75536	3.09969	9.29832	5.4135	7.19027
1	7.7125	9.11639	10.1097	7.59765	8.88305	7.60175	9.08146
1	7.65229	8.56051	9.80476	3.8403	5.49002	6.61529	8.17423
1	6.82483	7.21307	8.91112	3.12975	5.72909	7.56982	7.40542
1	5.80457	5.95716	8.30118	3.45522	8.43484	6.2865	6.73518
1	6.3407	7.06235	8.68635	3.96589	6.66513	6.56675	7.03428
1	6.62454	7.71341	9.67232	2.96116	9.2152	7.28935	7.46497
1	7.39486	8.13934	9.88158	3.16956	7.81178	7.2715	8.22734
1	7.85248	8.4257	9.90003	3.24343	3.7431	7.36156	8.31486
1	7.59992	7.43867	9.60001	2.99985	4.86036	6.43394	7.38392
1	6.78244	7.98861	10.3749	4.67624	7.79584	5.99345	8.01888
1	7.81706	7.91046	9.44059	2.80989	5.85453	6.98023	7.82446
1	7.94803	8.3681	9.9319	4.00252	9.40961	6.92491	8.52087
1	6.6907	7.13465	8.79904	3.45419	5.51992	6.29678	6.98479
1	6.64506	7.78224	9.33099	3.21297	6.3855	7.34923	7.90546
1	6.25711	7.43929	9.26838	3.50731	9.08669	5.75474	7.55845
1	7.64298	8.91782	10.048	5.25574	5.48527	8.36476	8.66716
1	7.97406	8.10124	10.3854	3.60379	6.87576	6.99307	8.33431
1	6.94136	6.32039	8.53234	2.78108	5.99002	5.88829	6.68072
1	7.02721	7.27184	8.99389	2.90442	7.06774	7.11204	7.50923
1	6.25766	7.20592	9.58369	3.31834	7.08057	7.24746	7.3277
1	7.91485	8.21837	10.054	3.81518	6.25055	5.27559	8.3042
1	7.44638	6.48755	8.2163	3.92339	6.91059	6.4432	7.3438
1	7.13445	7.5482	9.86307	4.49249	6.54339	5.78874	8.36647
1	8.11464	8.2181	10.0495	5.41434	7.625	7.29013	8.51251
1	6.13229	6.32496	8.5869	3.33237	6.80113	6.38295	6.91353
1	8.06174	5.55344	8.2592	2.55072	6.87825	5.2292	7.50796
1	6.74396	8.13414	9.49904	3.94368	8.66969	6.01695	7.28765
1	6.85493	7.80245	8.85602	2.69653	6.13768	6.40798	7.32763
1	7.58469	7.30604	9.40454	3.3453	9.04175	7.46285	8.47557
1	6.78366	7.64402	9.4702	4.36377	8.23578	6.45299	7.63616
1	6.04671	6.8718	8.71668	3.39655	6.38459	5.8258	6.82018
1	8.38937	8.66643	9.98788	4.30475	8.38132	8.14009	8.71476
1	7.68251	7.4501	10.0953	3.41396	6.77207	5.67883	7.89626
1	7.77592	7.27571	9.8763	3.07262	8.09162	6.61081	7.56855
1	6.703	7.29075	9.22298	3.38455	5.85479	6.38241	7.01945
1	8.43759	8.10389	9.94834	3.35924	7.56785	7.11765	8.16873
1	7.66395	7.547	9.72127	4.58473	6.47334	5.75508	7.78461
1	7.5104	7.11772	9.31622	2.95785	6.64788	5.92437	7.42254
1	7.30246	7.86631	9.83187	3.52076	6.50288	6.55952	8.17149
1	6.33086	7.64719	9.80567	4.3957	7.17711	6.60382	6.81058
1	5.44999	7.00039	8.0068	3.10208	9.89744	6.47301	6.02893
1	7.98179	8.68366	10.1543	3.00204	5.32387	7.59905	8.76851
1	7.64465	7.95204	9.51183	3.46659	9.42661	6.73418	8.19115
1	7.27133	7.53555	9.27166	3.64154	7.39718	7.74719	7.73263
1	6.31113	7.67319	9.28891	2.66795	6.81339	5.8332	7.71004
1	7.073	8.13777	9.97524	4.01594	5.77937	7.25324	8.24932
1	6.74491	7.53869	9.9643	4.20767	6.72357	6.74811	7.53902
1	8.71247	8.2568	9.79605	3.20276	9.13707	6.95657	8.64738
1	5.63583	6.8749	9.18732	3.33663	4.49066	6.2757	7.63629
1	6.81973	8.21655	9.53865	4.49299	6.75593	6.78624	7.87678
1	7.47971	8.32419	10.0317	4.37827	6.04891	7.40764	8.50285
1	6.59152	6.90348	9.55362	5.36534	6.19662	6.71818	7.09825
1	7.5992	7.71893	9.85657	3.45058	7.48193	7.25023	7.76006
1	6.40218	6.73688	8.8164	5.39722	5.81184	7.34534	7.04094
1	6.37347	8.73877	10.3231	4.76495	5.97042	7.22266	7.80662
1	8.55226	8.26187	10.008	3.83464	4.49965	7.29514	8.42049
1	8.3671	7.70492	9.91398	4.89589	7.3922	6.24106	7.9254
1	8.21848	7.62612	9.77459	3.20539	9.37407	5.55211	8.45649
1	7.35468	7.87356	9.59471	3.3281	6.44725	6.21179	7.7911
1	7.05257	7.98181	9.64375	5.60251	7.94438	5.22407	8.14151
1	6.42777	6.19939	8.59522	4.26372	3.2547	7.28748	6.96571
1	8.07011	9.05863	10.063	3.8109	6.12031	7.94114	8.48999
1	7.07048	8.25654	9.49443	3.48191	9.66874	6.55606	7.67901
1	6.6996	6.50723	9.58663	3.13695	9.35858	6.54642	7.56304
1	8.17303	8.29978	10.0915	3.37886	7.83551	6.98432	8.07258
1	6.82524	6.81185	8.76453	2.79717	8.97224	7.00479	7.4672
1	7.06543	7.31795	9.57408	4.4682	5.38477	6.83124	7.15288
1	7.05991	6.6733	9.3675	2.5922	8.31822	5.61602	7.64346
1	6.84366	7.25399	8.79954	2.71491	8.59823	7.46883	7.31636
1	6.59131	7.03426	8.78113	3.6781	9.19597	6.43243	7.68018
1	7.96538	8.41636	10.5966	5.21928	6.20721	6.77234	7.88914
1	8.93652	8.98353	9.71626	3.26623	5.19362	8.49138	8.61825
1	7.21179	8.04808	9.30832	4.02646	9.60234	6.80076	7.97602
1	8.71283	8.49468	10.0098	4.76717	8.06419	7.88644	8.89582
1	8.21463	8.40469	10.4334	4.14218	8.21158	5.52123	8.41628
1	6.60851	6.38121	9.20359	2.97608	6.63974	5.83032	7.03051
1	7.62853	7.65315	10.2062	3.83915	6.25123	6.10593	7.82895
1	8.20899	8.67034	9.93427	3.86533	5.69759	7.15184	8.17152
1	7.5247	7.37089	8.87981	3.15143	6.96847	7.12589	7.64912
1	7.03457	7.97365	9.58883	3.33561	8.49263	6.06458	7.23113
1	7.79783	8.53717	10.2272	3.80489	6.29143	7.12837	8.36934
1	6.55717	6.92318	9.24785	3.76418	9.20344	5.89087	7.65411
1	7.59073	7.88942	10.1903	3.4949	5.76703	6.21456	7.71365
1	8.06742	7.76705	9.71252	3.36999	5.77435	5.51796	7.64368
1	6.37849	6.15631	9.1397	3.53382	3.89011	5.52612	6.36571
1	6.95715	7.65168	8.99681	3.56512	6.56956	5.32601	7.64785
1	7.99309	8.67261	10.7748	4.999	5.65093	6.87342	8.22417
1	6.69036	8.37213	9.43647	2.69549	8.68832	7.37432	8.07161
1	7.57039	8.41946	9.4188	3.45524	9.53016	7.93422	8.06028
1	7.62392	7.64549	10.0218	4.01184	9.6383	6.45138	8.04638
1	7.20169	7.51677	9.59911	6.23415	5.45212	7.23405	7.61626
1	7.92754	8.23357	10.1484	4.80288	5.21625	6.27082	8.44698
1	6.83471	7.40786	10.2187	3.96716	8.58622	6.15145	7.4218
1	7.33882	7.40852	9.75098	4.56216	10.4617	6.9807	8.0929
1	7.49634	8.24773	9.70291	4.33215	7.72761	6.51128	8.07474
1	8.92712	9.36309	10.2845	2.79952	8.99798	6.33839	8.81325
1	7.21527	7.50539	9.32457	5.07234	7.21847	6.60423	7.92159
1	6.00934	6.76562	8.72602	2.99086	9.89135	5.47629	7.24745
1	7.08002	8.20267	10.0757	4.54197	5.90374	6.92289	7.9953
1	8.46287	7.0689	9.07387	2.73528	7.10345	5.88182	7.46587
1	6.4545	6.0698	8.43497	2.3077	4.78106	6.6965	6.64996
1	6.10584	6.82345	9.16949	3.98914	8.08693	5.70449	6.77376
1	7.40673	8.16896	9.6257	3.00511	8.61375	7.06515	8.29657
1	6.16838	5.38676	7.45263	2.67817	8.18189	5.47009	5.50837
1	9.19217	8.74013	10.4243	5.98926	5.86851	7.94493	8.99167
1	7.02027	8.59757	10.1192	3.29205	5.06077	6.77662	8.43609
1	6.90866	7.80468	9.92045	3.25695	8.15404	6.96098	7.91871
1	6.33007	6.48911	8.85742	3.5322	8.88296	5.78233	7.3003
1	6.83218	8.33872	9.31371	4.30011	7.88507	7.23671	7.64879

## Sheet: Diagnostic markers-LOGISTIC
outcome	CD59	SERPINB2	CFD	P2RX1
0	5.24328	2.3569	10.0578	4.66225
1	7.8475	3.02665	6.90162	6.92221
1	7.63088	6.11336	9.01942	6.41582
1	7.04822	3.32923	7.97853	6.54494
1	6.06508	3.1101	8.8561	6.6393
1	7.36075	4.54102	6.90724	7.61453
1	7.82708	4.40195	6.33532	6.05331
1	5.38834	3.6764	7.03018	6.13069
0	4.91932	2.98225	8.15717	4.82727
1	6.10987	3.96004	7.73536	5.46437
1	9.29718	3.11002	5.50701	6.03586
1	7.67994	3.22524	5.53812	6.78156
1	7.21343	5.23036	7.19476	6.47306
1	6.85849	4.50599	9.05082	6.71178
1	7.31468	3.81793	5.60509	6.88735
1	7.0555	3.65596	7.19349	5.70459
1	7.26358	5.60341	5.18458	6.36364
1	7.40535	4.62303	3.84494	6.53806
1	8.6638	4.10306	7.46025	6.86645
1	6.74745	3.15805	9.36902	6.62923
1	8.52167	5.23538	4.7339	7.47275
1	6.10088	3.87138	6.76649	5.40179
1	7.85024	4.87467	7.72012	7.17892
1	6.93146	4.89175	6.29554	4.00254
1	7.61577	3.89506	6.93663	6.06617
1	8.27439	3.78665	8.79862	7.73994
1	6.56351	3.32524	6.15519	6.58575
1	5.84176	3.36437	10.1236	7.16405
1	8.36893	4.63864	6.30016	6.70119
1	7.48527	4.30227	6.34503	5.1984
1	7.8495	4.60839	7.51925	6.51525
1	6.43956	3.60489	9.29009	6.21433
1	7.05904	4.99583	5.67634	5.42448
1	8.51224	3.24625	8.16188	7.98987
1	6.90046	4.25963	9.26866	5.5232
1	6.61774	3.07011	9.14199	6.3114
1	7.90932	5.81967	6.6457	5.69273
1	6.88732	2.78997	9.58637	6.92914
1	7.9818	6.74503	6.36206	6.70696
1	7.55027	3.49953	7.92591	7.10655
1	7.31207	3.77477	5.40597	6.09841
1	7.41695	5.1269	8.57334	7.77974
1	6.44665	2.97627	6.72983	5.30422
1	8.93772	4.84539	4.50465	5.72995
1	8.33293	3.22281	8.09346	5.63685
1	6.5196	3.63155	9.5733	7.41811
1	7.34804	3.32304	5.73142	6.23091
1	7.12584	2.8463	8.43218	6.2513
1	6.78109	3.88874	6.62714	6.93446
1	7.81244	4.10414	6.21307	5.85392
1	6.82913	3.47462	10.33	6.62643
1	7.766	3.86569	4.74337	5.75884
1	6.82596	3.19629	5.55591	6.37111
1	7.10184	3.6996	3.69859	6.39487
1	8.28921	4.73276	4.06566	6.85439
1	6.75295	3.11037	9.37028	7.19122
1	6.70781	3.03022	6.21009	6.47266
1	8.4342	4.55398	8.34974	7.57142
1	8.53203	4.58995	8.75119	7.84539
1	8.3976	3.17577	6.38989	5.9418
1	7.45536	4.20409	5.43439	6.2383
0	4.73171	3.67777	7.10157	4.40155
1	7.96759	5.66093	6.36735	6.70927
0	5.18771	2.31125	8.12132	5.43979
1	7.80392	4.6444	5.42244	6.43879
1	7.24548	4.09114	9.77778	7.40068
1	7.6176	2.90399	8.55451	6.23648
1	7.81554	4.20882	5.7011	6.72661
1	7.66697	6.33224	5.89272	6.92538
0	5.31316	2.75237	7.79019	5.19097
0	5.07142	2.55676	8.07901	5.8093
0	5.03938	2.6002	9.02608	5.87574
1	8.22338	3.37311	7.0687	6.62285
0	5.06635	2.32767	9.04192	5.20417
0	5.91878	2.47277	7.68952	4.59219
0	5.10184	2.9609	7.64868	5.32543
1	6.22947	4.66822	7.78979	6.8857
1	6.77492	4.36304	7.64142	7.14239
1	7.65943	2.59078	4.92441	7.34706
1	6.17909	3.05534	6.53988	5.4864
1	6.94425	2.56847	6.30303	6.5755
1	7.17683	4.64964	6.19376	5.55008
1	8.48498	4.64165	6.21667	6.0951
0	5.40834	2.65017	9.14017	5.23573
1	8.27077	4.62598	5.33443	6.75796
1	6.886	4.12769	7.66173	7.38078
1	6.5443	3.27006	6.10567	5.40642
1	7.41323	3.58525	7.78001	5.4684
1	8.80069	5.89489	5.93107	5.9426
1	8.77508	4.7428	8.41526	6.97978
0	5.48441	2.60149	7.1994	5.23477
0	4.55166	2.39531	9.50114	5.91473
0	5.68676	4.66396	8.2308	5.22989
0	4.95745	2.36928	7.70114	5.22016
0	4.86009	3.0741	10.3319	5.53067
0	5.22905	3.05224	9.96667	4.30116
0	5.33823	2.40254	9.78175	5.08061
0	5.12931	3.26305	8.29888	5.42814
0	5.36978	2.68959	7.33617	5.81393
0	4.99049	3.14709	9.4299	5.32605
0	5.2719	2.78488	8.45197	5.52883
1	8.55445	5.71185	7.49392	6.4805
1	7.42834	4.77894	4.42168	5.79056
1	7.19997	3.29569	9.41421	6.85114
1	6.61928	4.20909	9.19964	6.07403
1	7.10594	3.25596	7.07928	5.76121
1	7.62387	3.25257	7.24979	5.7037
1	7.81114	6.85891	5.34868	6.09122
0	5.08756	2.49989	7.22295	4.49073
0	4.78272	2.49406	7.50005	4.85844
0	5.21589	2.31499	9.39421	4.89193
1	7.74068	3.78508	6.85545	6.36631
0	5.21657	2.21203	7.79466	5.43212
0	4.96726	2.38662	8.705	5.70162
0	5.17007	2.63743	9.05168	6.00485
0	4.62351	2.92946	6.80437	5.07162
0	5.84899	3.09616	8.751	5.36351
1	5.53451	2.94211	8.50136	5.88474
1	7.86372	4.76266	6.33453	5.92917
0	5.22163	2.83175	9.88774	5.72871
1	7.62757	2.94034	9.10297	5.00705
1	7.50567	5.15393	5.49171	7.06177
1	8.48337	5.90651	5.22266	6.63498
1	7.90228	4.24727	8.13222	7.82642
1	8.9887	4.09535	5.36686	6.73414
1	5.36876	3.91592	8.89474	5.28853
1	9.43889	4.01644	8.72185	7.73492
1	8.59875	3.45316	4.37761	6.41192
1	8.32311	3.78325	4.0519	8.06705
1	6.87581	3.20586	8.25291	6.54957
1	6.13639	3.58887	5.46617	6.12313
1	8.98523	5.62099	4.80733	6.93161
1	6.73388	6.31875	6.85607	6.01273
1	8.40116	3.42597	4.95191	7.15111
1	7.25784	2.67782	6.2246	4.70543
1	7.32863	5.98226	4.74779	6.0654
1	6.75908	3.89473	8.41011	6.37204
1	6.19005	2.4057	5.11182	6.17166
1	6.61397	2.87725	8.2993	4.83339
1	7.8689	3.69839	5.51335	5.8518
1	6.0788	2.9711	8.63056	4.69093
1	7.48015	3.50995	8.62884	6.93414
1	6.40672	4.33953	9.51866	5.34313
1	5.22593	3.89904	10.4431	6.75132
1	7.14207	3.56013	6.45799	5.42877
1	6.8195	5.18628	5.78266	6.80335
1	8.08559	5.95803	7.99536	6.21794
0	4.61788	3.21717	8.55057	5.18907
1	7.14899	4.49558	7.21258	6.26317
1	6.89221	3.11788	6.89347	6.93382
1	7.25603	5.05469	6.32241	6.38722
1	7.59164	3.52378	9.17691	5.47516
1	6.39666	3.49236	3.59817	5.8249
0	5.56948	3.02702	9.50959	5.30361
1	6.34443	2.28174	8.79776	6.2431
0	6.08219	2.46273	7.59481	4.92602
0	5.197	2.50001	6.73015	5.54583
1	7.53835	3.69972	3.84318	6.22348
1	6.65313	3.19003	6.8332	6.25724
0	5.88958	2.68992	6.81027	4.31485
0	5.30838	2.37672	9.48234	4.64307
0	5.1005	2.90257	7.1619	4.62768
0	5.49513	2.38711	7.04254	4.49797
0	6.43047	3.10464	9.10692	4.74179
1	6.91972	2.85343	8.68416	5.86389
0	5.90017	3.90022	7.60486	5.8544
1	6.68843	2.48185	9.61355	5.61594
1	6.22534	5.22746	6.60484	5.34434
0	4.93383	3.24937	7.33517	5.01634
1	7.71716	3.26137	5.82297	5.48556
1	7.0383	3.40899	6.63897	6.43959
1	6.95914	2.59184	7.72436	6.4061
1	4.98761	2.63421	4.60492	3.69342
1	6.94833	3.11032	6.11485	5.67318
1	7.99938	4.94885	8.36812	6.6434
1	7.81729	3.36126	8.09203	6.33678
1	8.22473	5.13435	4.7891	6.31228
1	7.85895	5.11292	6.7521	5.33549
1	7.96047	4.49879	5.69387	7.25104
1	6.15299	4.3179	9.21224	6.83595
1	8.87761	3.14232	3.74122	7.87922
1	7.75057	3.44969	5.73728	5.83625
1	6.81206	3.06049	6.26285	6.72881
1	7.09217	2.94345	8.06356	5.07362
1	7.33025	2.61001	9.5492	5.27562
1	6.67624	4.48471	10.1397	6.48403
1	8.94815	3.09955	4.64163	8.28203
1	6.63358	4.00687	9.6085	5.65272
1	8.88445	2.44146	6.38655	5.97521
1	6.31726	5.68623	9.23512	5.86961
1	7.62676	4.32637	10.1824	5.17115
1	7.91819	3.4132	7.18744	7.09774
1	6.84303	2.91049	7.17297	7.64973
1	6.72291	3.12727	10.3296	6.38819
1	6.93692	5.2675	8.29833	6.45912
1	6.07951	4.3697	6.35305	6.84537
1	8.79774	3.39485	8.73185	7.17209
1	5.60274	2.54141	6.37338	7.07281
1	6.41989	5.90616	8.61687	6.21367
1	7.34864	3.08634	8.97464	5.41492
1	7.40287	4.08036	4.41001	7.35642
1	7.26297	3.53852	6.65557	6.34384
1	7.6742	4.85335	6.11193	6.43476
1	6.78795	3.22208	7.1152	7.0622
1	8.51178	2.58633	8.5576	6.28885
1	7.22598	2.62638	5.62715	5.89762
1	7.34517	3.33026	6.96018	5.5811
1	5.62794	2.96772	6.01013	8.12451
1	6.97279	2.95582	7.98498	7.06756
1	8.35589	4.94816	7.77829	5.64852
1	7.16986	4.11839	5.75767	6.12803
1	7.46239	2.96076	6.15335	6.22049
1	7.94079	3.0172	8.44476	6.27324
1	5.32827	2.46219	8.7571	6.12892
1	7.31392	3.54238	5.79553	6.74026
1	8.19692	3.02642	8.32891	6.69425
1	5.48886	4.1724	6.58891	6.8916
1	7.47138	2.9066	8.18294	6.01782
1	7.01618	3.20232	9.50013	6.74764
1	6.25176	3.56682	6.10604	6.78909
1	6.27585	3.56077	8.11994	6.44529
1	5.89597	4.33444	6.66135	4.85623
1	8.1346	3.7012	5.83578	6.76057
1	7.4585	4.53277	9.27315	7.82449
1	7.03573	4.47387	5.15043	5.03666
1	6.8171	4.56575	7.22159	7.53693
1	7.66205	4.66677	4.38626	6.34462
1	5.119	4.11515	6.01522	5.72611
1	6.34544	3.97793	10.3755	7.40906
1	6.90324	4.53991	7.9701	7.13834
1	6.43636	5.81233	5.56619	6.03675
1	6.86821	3.93692	9.5532	4.85687
1	7.57552	3.81406	5.28902	7.49648
1	6.99793	5.29374	5.93209	6.78658
1	7.8948	3.20684	8.62294	6.51976
1	6.53197	3.97945	8.96374	5.72761
1	7.80712	3.80409	6.69343	6.1841
1	6.77318	2.98979	8.38706	6.96999
1	6.45849	3.81909	5.98686	4.97038
1	8.47313	3.43856	7.15998	6.85733
1	6.41362	3.88214	6.93947	5.72458
1	7.67133	5.39449	6.2634	7.63461
1	6.76885	3.9539	9.95426	7.23727
1	6.64057	2.67785	7.09585	6.34904
1	6.89084	3.06661	8.23878	5.43627
1	7.67652	2.87982	9.00674	7.18271
1	8.8853	6.98089	4.57472	7.96933
1	7.20543	5.76878	5.44062	5.67055
1	7.96809	3.15874	3.621	5.1456
1	7.27816	5.1971	9.15596	6.91811
1	7.81059	2.88158	5.11361	5.43655
1	6.5308	2.94074	8.18519	6.87971
1	6.25786	3.94366	6.96621	6.05062
1	8.61932	3.03845	8.84912	6.54702
1	9.35967	4.78737	3.44925	7.59414
1	7.16	2.6689	5.91315	6.06527
1	6.85	3.5988	8.37921	5.65129
1	5.73564	3.19386	8.98125	5.8612
1	6.03836	4.5076	9.65323	6.63094
1	7.77475	3.33415	10.3461	6.85479
1	8.0632	3.85603	7.02867	7.57337
1	6.01103	4.53616	6.21564	6.72297
1	8.0955	3.68562	6.25105	5.99301
1	6.95045	2.98968	6.97208	6.77399
1	6.09731	2.71784	9.97069	6.85379
1	6.7464	5.28575	9.60954	6.57832
1	8.19252	3.35688	5.83286	7.57008
1	7.64094	3.18626	8.82649	7.1555
1	7.40726	2.88821	6.70958	6.18469
1	6.33635	3.4277	6.72608	6.23802
1	7.52353	5.34208	6.00002	6.81988
1	7.66266	3.423	5.51413	7.73118
1	6.29128	3.87264	7.8388	6.24233
1	9.49092	3.08291	5.61264	4.53815
1	7.49334	3.7286	8.49975	6.06184
1	8.88317	3.71677	7.19725	5.80195
1	7.39903	2.91329	5.40245	6.68525
1	7.02279	4.46977	6.40883	7.44558
1	7.70407	3.38389	6.2098	6.42441
1	6.70311	3.48197	7.83016	6.4437
1	7.49393	4.80692	7.20998	8.16432
1	7.42012	4.65572	7.00038	6.23997
1	8.35385	3.04451	6.03094	5.58129
1	6.73422	3.22953	6.54677	4.98749
1	5.65808	4.43059	7.57005	6.71037
1	7.21352	4.13631	5.14004	6.82
1	7.28927	3.83701	8.64335	6.19779
1	8.07632	2.88452	8.5013	6.02221
1	6.42661	3.14715	8.74859	5.51873
1	7.84566	2.69622	5.33805	7.21187
1	5.68658	3.04631	8.91232	4.90727
1	7.66283	5.75538	4.83804	7.32236
1	7.14559	4.13027	7.17473	6.98882
1	7.62795	3.96665	7.39808	6.01683
1	5.38974	3.08432	6.32207	6.06769
1	8.5351	5.07322	4.73678	6.93698
1	6.80085	3.24475	4.02346	5.2897
1	8.28527	5.05769	4.58933	7.86394
1	7.92216	4.1325	5.5515	7.6809
1	7.98831	4.1403	5.32557	7.24337
1	5.61361	3.12584	6.18933	4.34224
1	6.22016	3.6546	9.13592	7.13238
1	7.63799	4.12693	4.84015	5.94148
1	7.12468	3.45808	8.17039	7.40572
1	9.03638	3.9107	6.70121	6.41913
1	6.39008	2.96437	6.97677	5.46048
1	7.42133	2.96427	4.77453	7.50009
1	8.16671	3.40316	8.24907	6.8582
1	7.32605	3.86317	5.86614	7.39271
1	7.26157	3.39326	9.53327	6.96582
1	7.98801	3.68765	6.65065	5.76099
1	5.60656	3.60051	5.97842	5.32013
1	6.35097	2.61914	10.3727	6.50131
1	7.78621	4.54813	3.32824	7.60724
1	6.47087	3.48021	9.03698	8.02301
1	7.85369	3.07748	6.97155	7.21167
1	7.90923	3.31296	8.77849	6.73022
1	5.44789	3.04474	8.9158	6.75789
1	7.54012	6.17713	5.14257	7.37974
1	7.41251	4.26833	4.49094	6.21236
1	6.74448	3.44765	5.33052	6.7818
1	6.42169	5.9124	6.21657	6.13688
1	6.61819	2.75609	7.39268	6.3732
1	7.71646	3.08674	6.60294	5.51476
1	7.01186	3.69435	8.19262	7.3635
1	8.16895	4.00176	6.92673	6.28387
1	9.21101	2.58191	5.78505	7.3236
1	7.58088	4.5066	7.67726	7.21501
1	7.1129	3.77182	7.64043	6.54854
1	8.15573	3.35109	5.29507	5.64707
1	6.36097	4.65723	10.3439	6.58867
1	6.12998	2.96484	5.26068	4.18972
1	7.26505	5.93561	3.62522	6.90631
1	7.75768	3.98402	5.52128	6.70448
1	8.07243	7.53479	3.80943	6.60747
1	6.9505	3.22294	5.09308	8.28422
1	7.67841	4.00091	9.05882	7.35168
1	7.43753	3.50036	5.96145	5.97903
1	6.98467	3.3881	5.43951	5.70554
1	7.45561	3.13197	5.17546	6.99103
1	6.6622	3.54787	6.02793	6.24423
1	7.28757	3.95509	8.33505	6.1531
1	6.84957	3.75872	8.21848	6.90556
1	7.06464	4.30106	5.47142	7.54544
1	6.79847	3.41715	7.37857	6.77581
1	6.68477	4.32685	8.81554	7.30735
1	7.37043	2.61114	8.47865	6.59207
1	8.11202	3.09656	4.48148	7.1728
1	7.12462	2.82005	7.85638	5.5784
1	7.97609	4.08772	5.34209	7.13184
1	5.76694	5.29897	7.60615	7.15498
1	6.9053	3.29393	8.18891	5.28082
1	7.81844	4.22975	5.67405	5.95373
1	6.9765	4.75599	6.36251	6.1493
1	6.86142	4.61489	5.84207	6.67677
1	6.78276	4.0047	8.58867	5.85701
1	7.93448	6.10365	7.59301	6.87415
1	6.33478	5.49875	6.66393	6.49401
1	6.83072	4.12394	6.25261	5.40458
1	8.35973	6.75061	6.40825	7.30186
1	6.16451	4.98911	6.3035	5.95255
1	7.38391	4.80521	4.96141	7.07327
1	6.56921	2.97763	6.85653	6.35305
1	6.89028	3.95155	6.62148	6.70006
1	8.26262	3.70701	8.46765	6.44189
1	6.93227	2.97597	3.26146	7.9202
1	7.6715	3.91542	8.51423	6.5411
1	7.07403	3.86771	5.85513	5.84594
1	8.61203	3.28999	8.75296	7.16889
1	8.50108	6.7505	6.52244	7.2128
1	7.47675	3.69948	5.50329	6.71132
1	6.1039	4.30636	5.56624	5.91695
1	7.92227	3.06206	8.66661	6.21396
1	7.25545	2.54823	6.79445	4.00105
1	8.06888	2.53214	3.71388	5.31488
1	6.76662	4.25442	7.43077	5.99092
1	6.62283	4.09239	8.74322	6.18247
1	6.84429	3.90366	8.90184	6.24631
1	7.22761	3.91023	8.70644	5.57278
1	8.15619	3.3226	4.38314	6.65157
1	7.61555	4.24083	3.88201	7.21946
1	6.12637	4.24573	8.96606	6.48838
1	8.1892	3.11326	6.86438	5.41397
1	6.74656	5.26844	7.49623	7.03461
1	6.76093	4.33088	6.92731	7.21694
1	6.65987	5.32803	6.81905	5.83566
1	6.81109	2.74506	8.72723	6.72291
1	9.50628	4.96939	6.54977	5.91245
1	6.85241	3.45082	8.67957	6.64755
1	6.73085	3.55608	7.69501	4.58997
1	7.25239	3.91199	6.39517	6.91775
1	6.85167	3.03478	8.73038	6.24488
1	8.31961	4.54541	5.02057	8.05944
1	7.28741	3.28487	6.47592	7.03885
1	8.56925	5.42554	4.14849	6.63737
1	7.11389	3.89561	6.20457	6.81543
1	6.89266	3.06213	6.60459	6.25482
1	5.71104	3.10381	6.04389	6.08971
1	8.20785	4.21187	7.90889	6.78501
1	7.9299	2.98821	4.0411	6.05312
1	6.23603	3.72806	6.68785	6.58964
1	7.41997	3.13365	6.792	6.34635
1	6.54223	3.40673	7.10216	6.16422
1	5.90473	3.59831	7.03221	6.90284
1	7.7496	3.28068	6.53216	6.97966
1	7.96942	3.1797	6.64337	7.49728
1	6.58626	2.69078	9.64547	6.87958
1	8.19255	2.84404	6.4891	5.58509
1	8.14478	3.44221	8.08053	7.11249
1	6.64266	4.18992	9.11159	6.15142
1	5.81762	3.96286	9.12631	6.63984
1	7.9007	3.57914	3.29582	6.65036
1	5.84725	2.88266	7.15473	5.96232
1	6.72219	2.5698	8.5798	6.56539
1	6.50376	4.17857	5.76076	6.10866
1	7.63067	3.69747	7.70953	5.7022
1	7.45965	4.62724	5.53536	5.64686
1	6.0074	3.09565	8.8898	4.93342
1	7.73951	4.37375	6.16901	6.6855
1	7.68122	3.88123	5.34114	5.72891
1	8.16702	3.95854	6.25246	7.85408
1	7.13253	3.29403	4.18362	7.54366
1	7.48647	3.95671	8.06541	7.08972
1	6.14094	6.02791	6.12996	7.34878
1	8.54281	5.56506	5.22845	7.8176
1	7.26926	3.61418	7.87913	6.88377
1	7.33785	6.48547	6.74911	6.86933
1	5.51783	6.73959	8.84407	5.19622
1	7.24407	5.11617	7.86717	7.54449
1	8.11041	5.5822	3.20437	6.58466
1	8.46413	3.07405	5.36273	6.13949
1	8.64579	3.57132	3.83429	5.84182
1	7.73812	4.13529	6.71647	6.91961
1	8.26677	4.76954	7.08004	6.31925
1	6.91985	3.24055	8.74328	7.23769
1	7.12272	3.47179	6.42969	5.22928
1	8.70745	3.31828	3.02616	6.09009
1	7.10709	5.28742	8.95874	6.82061
1	6.28856	2.99903	6.67629	6.75521
1	8.64353	3.18973	9.1908	7.45562
1	6.70102	5.64099	8.6785	6.78889
1	7.20585	5.60178	5.15963	7.14806
1	6.76163	3.39716	5.54537	6.27217
1	8.2778	5.46617	5.62413	7.14572
1	7.28549	4.89514	5.59511	6.52782
1	7.78002	4.07531	7.77617	8.18456
1	7.60116	3.45723	4.00509	6.40804
1	7.78722	3.91351	4.83127	8.03517
1	6.01356	3.23612	8.60615	7.12183
1	7.6145	6.78811	5.94275	5.99247
1	8.17769	3.29417	5.28735	6.18741
1	8.5576	3.71632	6.59793	5.82024
1	8.47984	6.24033	4.99234	7.61105
1	6.96945	2.91184	5.07295	6.57173
1	7.13069	4.54576	8.74711	6.50308
1	6.86572	2.60488	6.99774	5.03904
1	7.00027	3.48291	6.44953	6.12676
1	7.01368	3.6694	8.14375	5.63697
1	6.17773	4.06442	6.72787	4.63747
1	8.14172	3.83845	6.74483	7.28426
1	7.2993	2.81722	8.23321	6.38056
1	7.86601	3.81821	9.00363	6.67681
1	7.84682	4.33815	6.02702	7.44055
1	6.92971	3.63218	8.61492	7.70542
1	6.50342	2.6325	7.7939	6.35123
1	6.3797	3.76699	7.46176	6.57349
1	6.76208	5.50238	3.97302	5.99602
1	6.87779	2.34854	7.25398	5.52267
1	6.98262	3.46427	8.46622	5.28398
1	5.56078	3.81795	5.84751	5.58381
1	6.95274	3.40867	6.81089	5.9308
1	7.31113	3.35178	8.54708	5.97779
1	8.48798	3.01508	4.65897	8.03508
1	7.81285	4.97404	9.56993	6.07
1	6.07817	3.49809	8.62203	7.1251
1	7.15558	3.59541	8.6275	7.36659
1	7.76542	3.84894	4.87679	6.79576
1	6.1972	5.18191	6.78336	7.00543
1	8.30601	2.80905	8.75638	4.71598
1	8.47634	2.42896	6.25711	6.02812
1	7.59713	3.56269	7.12567	5.97835
1	6.37748	3.62085	9.55724	6.97828
1	6.15306	3.94279	7.30108	5.84332
1	7.28594	3.43743	4.32852	6.8173
1	8.97153	3.63421	8.09423	6.36606
1	7.25436	4.55	7.91708	6.79067
1	7.09072	4.818	4.86749	5.58893
1	6.55332	4.93089	5.41496	5.65702
1	7.13856	5.55801	5.93581	6.37453
1	6.19851	3.88097	9.34995	5.28371
1	7.72366	6.35514	6.67596	7.77512
1	7.75568	3.53246	9.20452	6.18064
1	8.7349	7.12254	6.84855	6.80956
1	7.32354	2.8773	7.8644	7.3812
1	7.25246	3.17866	7.2134	5.00542
1	6.44466	3.38938	9.06966	6.93194
1	7.4524	3.02338	8.07739	7.37974
1	8.69327	4.6621	7.59732	7.46447
1	8.14068	3.47373	5.21409	6.27826
1	6.52379	3.34801	8.33919	6.9791
1	7.73595	3.03996	7.58838	6.02904
1	6.00781	6.0164	5.88866	6.69366
1	8.07651	5.42633	7.28469	7.82959
1	6.22562	2.99319	6.3217	5.90014
1	7.85696	6.19056	6.70568	7.53652
1	7.58347	6.00727	5.24986	6.72435
1	7.68585	3.73076	5.73301	7.07631
1	6.55354	4.53372	6.64446	6.81234
1	6.92474	3.07258	7.16805	7.35808
1	7.27188	5.89554	7.98636	6.33572
1	7.27481	5.84934	8.71652	6.36234
1	6.59947	2.80317	8.73014	5.87952
1	7.12686	2.78697	4.83542	6.31064
1	7.53007	3.03318	7.03279	5.89351
1	7.37794	3.05814	4.21413	5.51207
1	7.15169	3.26773	6.41437	5.3111
1	5.76026	3.19777	8.61999	6.34182
1	6.39794	5.65398	7.85939	6.34582
1	8.3808	6.51597	4.61455	5.78901
1	7.426	3.13631	4.93077	5.53049
1	7.45311	2.78069	7.94457	6.40315
1	6.72697	3.84022	7.51588	5.91485
1	6.69071	5.07278	6.55406	6.75794
1	8.71915	4.66756	8.08416	7.30435
1	7.47985	4.00386	8.161	5.85543
1	6.75341	3.99113	8.54261	7.17451
1	5.79259	4.15406	10.2971	7.67521
1	7.37134	3.4414	8.9011	7.34857
1	8.37857	3.76799	8.34776	6.00718
1	7.66159	3.85494	8.86793	6.73309
1	7.48119	3.18661	4.87089	6.95762
1	7.42954	3.16808	5.58409	7.59939
1	8.22862	4.03587	8.57007	7.03766
1	6.96139	4.60736	8.19082	6.70645
1	8.49153	4.2985	8.97244	5.81115
1	6.61929	3.41028	4.94214	5.94406
1	6.70885	3.23229	8.97328	6.07037
1	7.00179	5.6528	9.89528	6.69259
1	8.24238	3.74883	5.74946	8.21307
1	7.28313	3.26152	9.53661	6.58563
1	6.95864	3.21941	8.77237	6.16949
1	7.02683	6.07035	3.61561	5.70889
1	7.67837	3.92706	8.93848	7.32424
1	7.64268	3.52454	4.01762	7.5038
1	8.17675	3.34272	7.05965	6.29617
1	7.69642	5.47957	7.38083	7.32725
1	7.71034	3.12052	9.21508	7.40592
1	6.63236	2.99607	6.74121	6.22878
1	8.8871	2.81317	8.64857	6.4932
1	6.22195	3.13682	5.99338	6.39265
1	7.78106	4.40979	6.4138	6.32927
1	5.60931	3.94142	8.05199	5.24223
1	4.70727	2.872	7.72937	6.52276
1	7.40857	4.85456	8.30966	6.35765
1	7.34557	4.81206	6.26231	6.5197
1	4.71848	2.60853	3.25208	6.55543
1	7.88419	3.2013	4.86589	5.09233
1	6.70345	3.18976	5.8302	5.50006
1	6.87537	3.08933	6.32324	6.60534
1	6.72493	4.75977	4.71028	5.94583
1	7.43782	5.10788	7.73086	5.89023
1	6.56381	3.99194	8.60611	6.79192
1	9.15454	3.07131	7.66815	5.47674
1	7.43626	4.59195	5.25109	4.62142
1	7.20034	3.84632	7.7095	6.90351
1	6.85282	3.66322	9.12366	7.28619
1	7.56201	3.23107	4.71084	8.00033
1	5.7364	3.24089	6.738	6.59311
1	6.6933	2.61018	8.35563	6.8158
1	8.04837	3.05494	6.00169	5.43261
1	7.10135	3.70079	5.63547	7.08016
1	7.55766	3.5277	5.74705	6.77686
1	7.18018	2.67306	5.92276	6.92965
1	6.11911	5.63013	6.82683	7.55272
1	6.4515	3.154	9.93455	7.14977
1	7.26741	4.03891	8.88182	6.10328
1	6.84747	2.88515	4.2033	5.95066
1	6.54901	2.17756	5.80874	5.84114
1	7.28396	3.36458	7.71853	5.41694
1	5.96394	5.1919	10.2287	6.47663
1	5.5218	4.71125	9.35598	6.74945
1	7.74254	3.73907	8.78477	5.93249
1	6.62729	3.66069	6.67746	6.10706
1	7.42853	6.81387	4.33171	7.2989
1	7.69463	2.94573	6.82135	6.80838
1	7.52524	3.2128	7.34123	6.733
1	6.07708	2.96394	6.44619	5.81521
1	5.84755	3.26011	7.5613	5.5513
1	8.18791	4.36772	9.47612	5.8823
1	7.87582	4.99931	4.56013	8.18574
1	6.85724	3.41648	9.23874	5.75111
1	5.84767	5.41024	10.524	6.14614
1	9.05711	4.2616	4.33692	8.04973
1	7.91804	3.34926	4.97404	7.24116
1	7.6494	4.33665	6.8001	7.22907
1	6.52922	3.52164	10.3333	7.17773
1	6.03547	3.58646	6.30669	6.93929
1	6.63012	4.23623	8.59459	7.22727
1	7.14594	3.50808	6.45556	7.83453
1	7.78381	3.11104	5.95429	6.45479
1	6.908	4.35111	7.71853	6.75042
1	6.75986	5.4681	7.87057	5.6892
1	7.65598	3.99496	8.46416	5.98757
1	7.81609	3.22063	3.37437	7.03564
1	6.84658	3.42296	7.52383	7.18704
1	6.7179	2.62326	7.25458	5.79651
1	8.3068	4.18138	8.65562	7.61173
1	8.64106	2.90069	4.90506	7.64439
1	7.67006	4.33893	5.14697	5.85944
1	8.35633	5.93001	5.03483	4.98166
1	7.46505	2.55193	7.80657	5.02286
1	8.00166	3.38026	5.24146	5.66811
1	8.62541	6.27174	4.61637	7.24555
1	7.99968	3.61168	6.03009	7.01786
1	7.62653	3.85771	5.74235	6.47162
1	7.11801	3.01174	9.91457	7.02423
1	6.63265	3.13817	4.44344	6.55641
1	7.02937	2.60723	5.78434	8.01362
1	6.95203	2.90905	6.07041	6.59299
1	6.02296	2.82306	8.92202	5.4691
1	8.19499	3.86286	5.3623	7.22711
1	6.50492	3.41232	8.43452	6.51201
1	6.79676	3.80304	4.99123	5.92845
1	7.97139	5.59756	6.18048	6.54985
1	7.2287	4.03254	9.04279	5.62532
1	7.50064	3.30455	8.09487	6.24461
1	6.11783	2.79392	5.04162	6.07912
1	7.28664	4.47572	8.67167	6.35655
1	6.71407	4.01721	6.28518	6.72619
1	6.61083	3.01337	8.41033	6.5246
1	9.74125	3.31325	4.90036	6.08903
1	7.12501	5.12424	6.60539	6.65807
1	8.68725	4.05331	3.57736	7.9173
1	6.77843	5.1004	9.01374	6.90868
1	7.52027	2.73663	9.32388	6.11783
1	8.27496	5.75118	8.04253	7.83072
1	7.59703	3.62931	6.98585	6.59311
1	6.70766	3.58734	8.79986	5.76101
1	6.08196	7.46887	4.02103	5.0704
1	5.22222	4.08674	8.72679	5.65107
1	8.43095	5.84287	4.24373	6.45528
1	5.59091	4.53129	8.31449	5.00268
1	9.14287	2.49479	7.96786	6.33952
1	7.16596	3.65657	8.93156	5.33946
1	7.3828	2.4127	8.42313	7.54343
1	7.90671	3.5175	7.03399	6.11269
1	7.85583	3.22899	8.20285	7.13673
1	6.53762	3.45397	6.43122	7.27543
1	5.98996	4.44067	6.63403	6.50496
1	6.4103	3.62087	7.23707	6.31286
1	7.95449	5.24962	7.82949	6.73441
1	7.02328	2.9237	8.74326	5.66578
1	7.63493	4.84686	4.41609	6.36729
1	7.37219	3.80075	4.39424	6.13679
1	5.61373	4.72899	7.96743	5.67581
1	7.80832	3.56795	3.58866	5.18542
1	6.69969	8.36044	3.76476	4.62377
1	5.58482	3.57285	9.21943	7.03851
1	8.07852	4.65211	8.33267	6.74153
1	8.2737	2.96395	5.56913	6.65928
1	6.37128	2.57688	9.15909	5.55426
1	7.48268	4.1198	5.84457	7.44088
1	9.35195	2.61335	7.11017	5.32982
1	8.79208	5.01454	4.03617	6.88275
1	7.7574	4.76523	8.257	7.89545
1	5.87013	3.15247	8.9899	6.81466
1	7.59238	7.44994	5.61287	6.54903
1	6.57577	3.00698	4.33207	6.65921
1	7.49367	3.35971	8.90074	7.15269
1	6.38774	3.84351	5.65936	6.42311
1	7.25099	3.60991	8.95783	4.47685
1	6.74127	3.75493	6.50258	6.1711
1	7.30536	3.03615	9.06628	6.12305
1	7.26038	5.20369	8.8668	6.2749
1	7.74283	5.67632	6.24838	6.06706
1	6.9184	3.08484	4.80959	6.51457
1	8.19253	3.76619	5.08281	7.70248
1	9.03245	3.29824	3.88685	6.02518
1	7.59622	2.87138	9.17094	5.89023
1	6.92567	4.16506	7.58312	5.42781
1	7.05439	3.08406	6.70772	5.85455
1	8.7082	5.90223	5.18771	7.34464
1	6.80253	4.45756	8.92471	6.10106
1	7.32254	4.3291	9.81779	6.3196
1	7.39071	3.0664	5.11995	5.98865
1	6.85982	3.59183	7.38969	6.9097
1	7.71831	3.41607	9.30868	6.93954
1	8.07298	3.77424	5.38384	6.80377
1	7.82267	4.67977	8.53009	7.44803
1	7.92466	4.10734	5.24998	7.21533
1	7.87008	2.86044	5.12941	7.45323
1	6.69184	4.29586	8.01759	6.76234
1	6.68878	3.09969	9.29832	5.4135
1	7.7125	7.59765	8.88305	7.60175
1	7.65229	3.8403	5.49002	6.61529
1	6.82483	3.12975	5.72909	7.56982
1	5.80457	3.45522	8.43484	6.2865
1	6.3407	3.96589	6.66513	6.56675
1	6.62454	2.96116	9.2152	7.28935
1	7.39486	3.16956	7.81178	7.2715
1	7.85248	3.24343	3.7431	7.36156
1	7.59992	2.99985	4.86036	6.43394
1	6.78244	4.67624	7.79584	5.99345
1	7.81706	2.80989	5.85453	6.98023
1	7.94803	4.00252	9.40961	6.92491
1	6.6907	3.45419	5.51992	6.29678
1	6.64506	3.21297	6.3855	7.34923
1	6.25711	3.50731	9.08669	5.75474
1	7.64298	5.25574	5.48527	8.36476
1	7.97406	3.60379	6.87576	6.99307
1	6.94136	2.78108	5.99002	5.88829
1	7.02721	2.90442	7.06774	7.11204
1	6.25766	3.31834	7.08057	7.24746
1	7.91485	3.81518	6.25055	5.27559
1	7.44638	3.92339	6.91059	6.4432
1	7.13445	4.49249	6.54339	5.78874
1	8.11464	5.41434	7.625	7.29013
1	6.13229	3.33237	6.80113	6.38295
1	8.06174	2.55072	6.87825	5.2292
1	6.74396	3.94368	8.66969	6.01695
1	6.85493	2.69653	6.13768	6.40798
1	7.58469	3.3453	9.04175	7.46285
1	6.78366	4.36377	8.23578	6.45299
1	6.04671	3.39655	6.38459	5.8258
1	8.38937	4.30475	8.38132	8.14009
1	7.68251	3.41396	6.77207	5.67883
1	7.77592	3.07262	8.09162	6.61081
1	6.703	3.38455	5.85479	6.38241
1	8.43759	3.35924	7.56785	7.11765
1	7.66395	4.58473	6.47334	5.75508
1	7.5104	2.95785	6.64788	5.92437
1	7.30246	3.52076	6.50288	6.55952
1	6.33086	4.3957	7.17711	6.60382
1	5.44999	3.10208	9.89744	6.47301
1	7.98179	3.00204	5.32387	7.59905
1	7.64465	3.46659	9.42661	6.73418
1	7.27133	3.64154	7.39718	7.74719
1	6.31113	2.66795	6.81339	5.8332
1	7.073	4.01594	5.77937	7.25324
1	6.74491	4.20767	6.72357	6.74811
1	8.71247	3.20276	9.13707	6.95657
1	5.63583	3.33663	4.49066	6.2757
1	6.81973	4.49299	6.75593	6.78624
1	7.47971	4.37827	6.04891	7.40764
1	6.59152	5.36534	6.19662	6.71818
1	7.5992	3.45058	7.48193	7.25023
1	6.40218	5.39722	5.81184	7.34534
1	6.37347	4.76495	5.97042	7.22266
1	8.55226	3.83464	4.49965	7.29514
1	8.3671	4.89589	7.3922	6.24106
1	8.21848	3.20539	9.37407	5.55211
1	7.35468	3.3281	6.44725	6.21179
1	7.05257	5.60251	7.94438	5.22407
1	6.42777	4.26372	3.2547	7.28748
1	8.07011	3.8109	6.12031	7.94114
1	7.07048	3.48191	9.66874	6.55606
1	6.6996	3.13695	9.35858	6.54642
1	8.17303	3.37886	7.83551	6.98432
1	6.82524	2.79717	8.97224	7.00479
1	7.06543	4.4682	5.38477	6.83124
1	7.05991	2.5922	8.31822	5.61602
1	6.84366	2.71491	8.59823	7.46883
1	6.59131	3.6781	9.19597	6.43243
1	7.96538	5.21928	6.20721	6.77234
1	8.93652	3.26623	5.19362	8.49138
1	7.21179	4.02646	9.60234	6.80076
1	8.71283	4.76717	8.06419	7.88644
1	8.21463	4.14218	8.21158	5.52123
1	6.60851	2.97608	6.63974	5.83032
1	7.62853	3.83915	6.25123	6.10593
1	8.20899	3.86533	5.69759	7.15184
1	7.5247	3.15143	6.96847	7.12589
1	7.03457	3.33561	8.49263	6.06458
1	7.79783	3.80489	6.29143	7.12837
1	6.55717	3.76418	9.20344	5.89087
1	7.59073	3.4949	5.76703	6.21456
1	8.06742	3.36999	5.77435	5.51796
1	6.37849	3.53382	3.89011	5.52612
1	6.95715	3.56512	6.56956	5.32601
1	7.99309	4.999	5.65093	6.87342
1	6.69036	2.69549	8.68832	7.37432
1	7.57039	3.45524	9.53016	7.93422
1	7.62392	4.01184	9.6383	6.45138
1	7.20169	6.23415	5.45212	7.23405
1	7.92754	4.80288	5.21625	6.27082
1	6.83471	3.96716	8.58622	6.15145
1	7.33882	4.56216	10.4617	6.9807
1	7.49634	4.33215	7.72761	6.51128
1	8.92712	2.79952	8.99798	6.33839
1	7.21527	5.07234	7.21847	6.60423
1	6.00934	2.99086	9.89135	5.47629
1	7.08002	4.54197	5.90374	6.92289
1	8.46287	2.73528	7.10345	5.88182
1	6.4545	2.3077	4.78106	6.6965
1	6.10584	3.98914	8.08693	5.70449
1	7.40673	3.00511	8.61375	7.06515
1	6.16838	2.67817	8.18189	5.47009
1	9.19217	5.98926	5.86851	7.94493
1	7.02027	3.29205	5.06077	6.77662
1	6.90866	3.25695	8.15404	6.96098
1	6.33007	3.5322	8.88296	5.78233
1	6.83218	4.30011	7.88507	7.23671

## Sheet: Prognostic markers-LASSO
outcome	time	RNF4	KDM1A	AAK1	GATA2	F5	MTHFR	STAT5B	STAP1	FCGR3A	MIR21	HPSE	MX1
0	28	6.45288	4.63408	4.97322	2.92999	4.39072	5.01623	6.33295	2.75168	9.16809	6.98155	3.32382	7.07319
0	28	6.40763	3.42202	6.32559	2.42655	5.66044	3.93241	8.11706	3.88143	7.98241	8.92249	6.27988	10.0941
0	28	6.45337	3.92187	4.67342	2.64947	5.90681	4.5891	6.95138	2.06816	7.70403	8.12768	7.56888	4.83232
0	28	6.69306	4.65015	5.39613	2.70222	6.39399	4.32141	7.74227	3.9086	8.73214	8.00923	5.81924	5.27904
0	28	7.39442	4.10532	5.51027	2.89158	6.06847	5.13683	7.92792	2.78078	8.45024	7.82603	5.21209	8.16937
0	28	7.06032	4.501	4.91597	2.70153	5.44116	4.80283	7.69908	2.44207	9.43002	8.75408	6.87686	8.43913
1	4	7.22195	4.35723	4.86381	2.3034	5.54248	5.23106	7.1844	4.82562	9.96905	7.6308	7.02405	4.97492
0	28	7.49744	5.20161	6.08208	4.35266	3.90262	5.06919	6.70322	4.40936	9.37677	7.44322	5.10538	6.92209
0	28	7.64529	5.09166	5.68912	4.22584	3.93792	5.43294	6.67205	4.27159	10.3366	6.84794	5.13505	9.63485
0	28	7.14065	4.70088	4.75349	3.05398	4.77939	5.0353	7.05241	2.6711	10.1643	7.6945	6.0032	5.58025
0	28	7.86715	5.59679	5.68579	4.38782	4.64381	5.01156	6.7675	4.00324	9.52991	6.89563	5.23524	8.16087
0	28	8.11576	4.87678	5.65587	3.59769	4.75484	4.81754	6.6171	4.29378	10.0638	6.50302	5.55705	6.78619
1	17	7.65938	5.16941	5.88862	4.40463	4.58141	5.17742	6.98533	4.00384	9.8493	7.74177	5.60265	9.72924
0	28	5.09975	4.25418	3.8554	3.22399	4.7931	3.71177	6.3382	2.81294	8.06413	6.67304	4.59991	3.54653
0	28	6.58299	4.27397	4.48926	2.93911	6.16647	4.1167	7.68075	2.74961	9.04653	7.68984	6.01769	6.30954
0	28	6.35984	3.93774	5.06675	2.41437	6.6391	4.05441	7.43512	2.49557	6.48143	7.66055	7.7085	4.05568
0	28	6.81299	3.41583	4.37167	2.79834	5.64975	4.76315	7.40327	2.83431	9.48137	8.09785	5.93102	6.91333
0	28	6.91195	3.62587	4.82377	2.79373	6.50216	3.98268	7.80586	2.43014	8.21009	7.98789	5.80668	6.546
0	28	6.55375	4.20354	4.22665	2.42339	5.35383	4.11176	7.22306	2.55683	8.82652	7.44233	4.89753	4.81356
0	28	6.90981	3.95956	4.30787	2.38221	6.39827	4.27713	7.3989	3.04233	8.85576	8.4583	5.24397	5.60846
0	28	5.50394	4.32696	4.24216	3.42752	4.36266	4.15841	5.18684	2.56989	6.42435	4.88025	8.57333	6.51714
0	28	5.81641	4.20665	5.05506	2.48711	6.57332	4.47659	8.41359	2.50012	8.11877	8.39923	4.78668	5.33025
0	28	6.16643	2.85229	4.25439	2.4919	5.68918	4.35578	7.94551	2.94164	7.99319	8.73136	4.6366	8.42388
0	28	7.31165	4.20136	4.8007	3.50331	5.00748	4.96108	7.51318	2.87498	9.14045	8.01837	7.47225	5.2165
0	28	7.264	4.9168	5.3609	2.34106	5.46678	5.00952	7.14445	5.1144	8.59379	8.34597	5.547	5.94202
1	12	5.99905	4.21531	5.33785	2.56063	5.64665	4.5732	6.52335	3.40047	8.06559	6.59478	6.43462	9.69925
0	28	6.7726	3.94158	4.58307	2.98801	6.34293	4.55647	7.16628	2.6855	8.9171	8.75415	7.20854	5.0602
0	28	6.37748	3.90181	4.35535	3.3681	5.87263	4.5776	7.84652	2.60226	9.00579	8.32446	5.63805	4.94294
0	28	6.93699	4.23126	4.27221	2.89917	5.02024	4.43623	6.81332	2.70326	9.39661	7.16819	6.42662	5.39371
0	28	6.88979	3.78588	4.90187	2.23267	6.7442	4.06007	7.29325	2.65591	8.54517	6.78829	6.55801	4.98948
1	7	6.87013	4.26284	4.96314	2.16679	5.78769	4.35415	7.00205	3.78627	8.09077	7.42707	5.8939	4.047
0	28	6.51265	3.37335	5.25429	2.20603	6.52855	4.09026	7.26586	2.34868	6.84613	8.31439	6.55487	3.87775
0	28	6.79452	4.47286	4.80888	2.58086	5.85154	4.46902	7.43305	2.6595	10.1759	7.77696	6.63119	4.51723
0	28	7.0221	4.08531	5.27012	2.62024	6.31361	4.43897	6.98802	3.12604	9.23972	8.63261	5.53246	8.05288
0	28	7.17351	4.14135	5.59729	2.69516	7.17911	5.12255	8.11786	2.47278	9.05371	7.25968	7.14135	7.08238
1	11	7.80237	5.21986	5.77835	5.53666	3.84782	5.21045	6.18162	4.19018	10.5242	7.277	4.87116	7.93419
0	28	6.62108	4.0361	5.10659	2.3044	6.33022	4.10063	7.92926	2.97044	7.91504	7.79127	7.44136	5.28575
1	14	6.61498	3.78218	4.22715	2.68047	4.92556	4.12315	6.5976	3.39479	7.97922	7.05563	5.55188	10.0611
0	28	6.73838	4.67201	5.28519	2.97686	5.91378	5.46259	7.79588	3.50549	7.7737	7.82217	4.18304	9.36038
0	28	7.09532	4.24303	4.75975	3.73209	5.86637	4.55224	7.42928	2.73548	9.16797	8.04872	7.58955	5.07981
0	28	5.82781	3.39145	4.25175	2.38664	4.6857	3.91075	7.30089	2.27778	8.6554	6.8958	4.00591	4.85369
0	28	6.19887	2.93604	4.86545	2.38584	6.34194	3.79121	7.65248	2.29422	8.19206	8.55553	5.52708	3.9924
0	28	5.22579	4.40249	3.03057	2.37643	3.55666	3.75326	4.92523	2.5639	5.65535	4.17392	4.46109	4.69027
1	15	7.39344	4.78733	4.93261	4.81328	4.29338	4.63055	6.83196	3.25476	9.63109	7.65969	5.02388	6.66937
0	28	7.28012	4.77643	5.42069	3.5052	5.13312	5.28076	7.36088	3.71328	9.16964	7.46057	6.42514	7.93012
0	28	6.22361	3.36238	4.46524	2.83196	6.58491	3.68704	7.9994	2.4735	7.98131	8.568	6.40472	6.0947
0	28	6.87305	3.78308	5.65743	2.3168	6.06505	4.18107	7.64381	2.69416	8.60957	7.88641	6.92846	4.28465
1	1	6.46132	3.63839	4.90158	2.93544	6.54853	4.03958	8.22385	2.39785	7.32027	7.97788	4.44772	6.10061
0	28	5.86811	3.78024	4.43982	2.31387	6.57672	3.64625	7.85621	2.56169	7.64028	7.84556	4.49091	7.17712
1	2	7.78632	5.43495	6.07338	3.36029	4.2638	5.08664	6.54738	4.53604	9.60251	6.46631	4.64677	7.53809
0	28	6.82532	4.08481	5.12396	2.96216	6.17145	4.14187	7.13745	3.76404	8.85976	7.49957	6.95908	5.86814
0	28	5.81378	3.69625	4.60345	2.84954	4.82594	4.26327	6.72287	3.20741	6.02548	7.19922	7.27124	4.57634
0	28	6.57287	4.05766	4.8975	2.70298	5.78205	3.89402	7.54017	2.70238	7.27616	7.22607	4.73332	4.94024
0	28	6.89357	4.42024	5.97837	2.70048	5.60315	4.94675	7.18654	2.54054	9.13727	8.14069	7.1419	10.4426
1	0	6.95831	4.76791	5.77596	2.49427	6.28099	4.63595	7.44933	2.93665	8.34818	7.23089	4.49021	7.86568
0	28	6.49254	3.46243	4.55042	2.70092	5.77693	4.14725	7.93646	2.28276	8.58895	8.60216	6.60382	3.92601
0	28	7.323	4.26088	5.3326	2.38311	6.0718	4.58472	7.71495	2.65985	9.49715	7.57406	6.31787	4.5658
0	28	7.07016	4.08506	5.02769	2.63018	6.05602	5.06338	7.21717	2.67119	8.40241	7.29439	6.47407	7.382
0	28	7.14169	5.05454	4.50398	2.31597	5.53741	4.79143	6.58602	2.39681	9.78888	8.02214	6.26776	3.72345
0	28	6.65571	4.73481	5.50958	2.75657	5.75819	3.9032	7.11012	2.57873	8.46412	7.52549	7.28995	6.36112
0	8	5.80454	3.89754	3.95935	2.33985	6.34887	3.73874	7.73906	2.36647	7.00581	8.23361	5.38809	6.10661
0	28	6.63813	3.98999	5.00701	2.65462	6.47639	4.98213	8.37686	2.60832	8.31036	8.52288	6.44154	5.10582
0	28	5.91724	3.85632	5.14307	2.70101	6.59418	4.74662	8.29832	2.77339	7.11573	8.91547	6.05456	6.146
1	17	7.94106	5.06285	5.74955	4.79739	4.72691	5.31281	6.49625	3.8093	10.6819	6.93996	5.48186	7.15451
0	28	7.01179	5.07763	6.0247	2.69414	5.51289	5.14118	7.29927	3.988	9.7819	8.23294	7.00994	5.12306
0	28	6.71368	4.31909	5.10687	2.48071	6.55982	4.93634	7.89099	2.55062	8.87116	8.68717	6.22409	5.73367
1	0	5.90715	2.64464	5.304	2.63016	6.08297	5.43993	8.55189	2.29621	8.37486	8.17828	5.30307	3.87583
1	8	7.5283	5.55917	5.99799	2.9928	4.07808	5.95716	6.89331	2.46013	9.51477	8.03398	5.94422	6.54808
0	28	6.23116	4.37339	4.61582	2.53397	4.31584	3.50535	5.75182	2.70472	8.25674	6.8733	3.74368	5.68348
0	28	6.24522	3.60158	5.46536	2.58985	7.13268	3.79554	8.21486	2.29026	8.00638	8.84064	6.21885	6.19164
1	1	8.3856	5.42543	6.42267	5.7346	3.66495	5.17676	6.25433	4.26367	10.288	6.54592	5.06629	7.16886
0	28	6.54819	4.78492	5.81323	2.50523	6.67515	5.17515	8.41361	2.41366	8.52468	8.39122	6.7727	5.55183
0	28	6.90588	3.43536	4.93224	2.18952	6.04226	4.4571	7.97356	2.90421	8.71714	8.53849	5.72612	5.22372
1	0	7.30537	4.182	5.1085	2.54536	5.515	5.09972	7.30801	2.72811	8.34163	7.23984	5.84997	5.47538
1	14	6.77539	4.59441	6.1728	2.4055	6.90171	4.77432	7.5754	4.75999	8.86627	7.62467	4.75485	3.75373
0	28	7.41874	4.41639	5.5124	4.34463	4.90139	4.68998	6.4409	4.21876	9.63333	8.42725	7.66102	10.3719
0	28	6.88861	3.78971	5.93846	2.57883	5.37105	4.29771	7.20855	2.71319	8.58218	7.12745	6.19307	4.02183
1	20	7.8296	5.27802	6.25275	3.3672	4.65741	5.3048	6.52949	4.02678	9.59295	6.4393	5.24829	7.11638
1	15	7.7976	5.0562	5.50886	3.82595	3.75096	5.06396	6.43461	3.88143	10.1333	7.65371	5.32989	7.3644
0	28	6.32431	3.66098	4.64123	2.9098	5.91971	4.23549	8.09623	2.22274	8.31863	7.66398	5.81849	4.40755
1	22	7.36645	4.64549	5.16797	4.46973	4.87767	5.12289	6.84346	4.01078	9.62862	6.98976	4.06254	10.2776
0	28	6.83889	4.67597	4.64405	3.02474	4.98257	5.32032	5.84058	2.45572	7.63386	8.66804	5.71139	7.64146
0	28	5.12599	3.29313	4.32035	2.7721	5.53316	3.359	7.14927	2.78959	6.35608	7.89232	4.88175	8.12922
0	28	6.37612	3.96271	4.63377	2.32743	4.33636	4.0964	6.87613	3.55666	9.085	7.0092	6.43939	6.71679
0	28	6.83731	3.71903	4.55644	2.56117	6.1387	4.92356	7.79056	3.98139	8.81328	8.5966	7.44942	6.70012
1	28	7.127	3.31436	5.63677	2.42282	4.39959	4.17163	7.28336	4.4409	9.73986	7.69742	5.98443	7.80147
1	16	8.28649	4.8187	6.46071	3.93481	4.00096	5.21066	6.76337	4.42027	9.97772	6.12617	4.65412	7.28433
0	28	6.41424	3.38678	4.86521	3.1426	6.33122	4.49702	7.56176	3.61223	9.37637	8.16271	6.76149	10.4345
0	28	6.53345	4.35884	5.00463	2.43804	6.02798	4.30234	6.74802	2.48933	7.37349	7.72813	5.77391	5.42545
1	8	6.67176	4.54262	4.57237	2.46078	4.77698	4.46287	6.81386	2.58335	9.20125	6.97682	6.79105	6.71635
0	28	6.37348	3.50364	4.89826	2.46119	6.03705	4.26754	8.59278	2.73066	7.96384	8.99224	6.29246	7.66101
0	28	6.85706	3.57566	4.62014	2.67488	6.20133	4.48957	7.56808	2.34632	8.3154	8.20178	7.32912	4.46577
0	28	6.17662	3.44776	4.84605	2.87422	6.31045	5.05992	8.50993	2.97114	8.18468	8.07463	6.30614	6.55924
0	28	4.88628	3.45389	3.77901	2.59553	2.97386	3.01893	4.27174	2.38976	4.96343	4.55248	7.68506	3.59371
0	28	6.67033	4.22741	4.76807	3.63739	5.42667	4.8489	6.95378	3.22118	7.70682	7.10414	6.51824	4.09452
0	28	6.56086	5.22776	5.84396	2.46369	4.89976	5.4315	7.15336	3.12024	8.46067	6.32939	4.36473	4.77488
0	28	7.06649	4.22717	4.68557	2.50314	6.37832	4.09746	7.63963	3.11736	8.98528	8.15939	5.39828	6.43565
0	28	6.11847	3.44668	4.48836	2.85031	6.0813	3.14971	7.33757	2.75626	7.59677	7.45351	4.8507	4.14282
0	28	7.05807	4.82473	5.67875	3.97688	4.99773	4.55521	7.16379	4.18388	8.54125	7.05632	3.45771	7.38455
1	6	6.75888	3.88221	5.73597	2.19436	5.81513	4.88254	7.64479	2.79954	8.61347	6.87974	5.45974	6.27035
0	28	6.61042	3.44359	4.86101	3.07733	5.24734	4.21247	8.1711	2.65536	8.42806	8.11557	7.21399	9.91365
1	12	8.30903	4.83283	5.88552	4.18512	4.03538	4.87031	6.45328	4.41389	9.45044	6.6129	4.77061	8.2062
0	28	6.40743	3.59067	4.74449	3.38549	6.86188	4.05131	8.34248	2.28786	8.14694	9.1722	4.91054	4.01643
0	28	6.93775	5.08366	5.74944	2.35292	5.2565	4.70765	6.58655	4.03778	4.69939	6.01191	6.00202	8.45161
0	28	6.57837	3.33529	5.56773	2.24898	5.83509	4.66458	7.4618	3.21896	9.29769	8.07556	6.17359	6.35548
1	7	5.46896	4.44057	5.55905	2.63191	6.07656	5.25523	7.92165	2.12305	8.3071	8.24131	6.2105	5.92288
0	28	6.66488	3.55514	5.91417	2.48181	6.16168	3.96488	7.61612	3.36029	8.45341	8.72003	7.25484	9.54317
0	28	6.51569	3.36081	4.82824	2.3623	5.90766	3.72902	7.45308	3.42848	9.04926	8.31572	4.97901	6.32056
0	28	6.46207	3.3922	5.61829	2.62384	5.84762	4.08197	7.78567	3.25406	6.88301	7.25551	6.93935	9.48248
0	28	7.17271	4.21571	5.28683	2.66529	5.45273	4.81626	7.51405	2.68096	9.48389	8.02333	5.16458	7.21716
0	28	5.77433	3.87903	4.44165	3.00684	5.11381	4.35221	7.04898	2.81408	9.57416	8.22061	5.94501	8.39294
0	28	6.61854	3.68085	5.45883	2.36934	4.34191	4.46837	7.45072	3.09958	6.87459	7.84738	5.94507	5.78814
1	11	7.83384	5.26818	6.07547	3.00789	3.953	5.29447	6.62813	3.78378	10.311	7.11605	5.28812	7.57692
0	28	6.02157	3.87675	4.73844	2.4382	5.48226	4.17904	6.93349	4.89909	9.18967	8.48103	5.60665	10.0598
0	28	5.68104	3.96497	3.28684	2.36003	4.97998	3.34782	6.97963	2.05767	8.38706	7.03849	4.74359	8.57411
1	0	6.3762	4.71765	3.96529	2.78618	4.92414	3.3619	6.46437	3.44702	9.28229	6.87278	4.68481	9.07768
0	28	7.1779	4.17998	5.82888	2.60775	5.52913	4.44046	7.16417	5.41998	9.51546	7.65517	4.53553	5.05204
0	28	6.26163	3.63468	4.99393	2.49023	5.18789	4.06606	7.64296	3.11242	9.1097	7.80126	6.02124	9.93949
0	28	6.98202	4.0334	4.69326	2.45939	6.08313	4.00772	7.26017	2.45293	8.80193	7.7993	6.05086	4.58576
0	28	6.34658	3.69447	4.30995	2.45328	5.72659	4.51934	7.59092	3.11261	9.08	7.67885	4.95563	4.23036
0	28	6.22587	3.39642	4.36258	2.63316	6.88526	3.32911	7.88129	2.38638	8.22436	7.84156	6.21712	8.85779
0	28	7.55758	4.64351	5.1299	2.75995	5.45865	4.6504	6.72214	3.10636	10.3591	7.16056	5.25819	5.70834
0	28	6.58338	3.83773	5.13179	2.44114	6.1814	3.8859	7.57116	5.13564	8.8123	8.02628	5.55817	10.3602
0	28	7.05542	4.45718	4.83318	3.73964	5.56617	4.82043	7.5703	2.79478	9.23028	8.85362	6.01196	4.61384
1	13	6.73011	4.46925	4.81265	2.54954	6.26023	4.34619	7.0189	2.79054	9.97883	7.58149	5.40791	3.88469
0	28	6.30869	4.50353	4.339	2.72597	5.46655	4.8792	7.89938	2.38146	8.29306	7.84857	5.13106	5.53107
0	28	6.6607	4.07936	4.75025	2.7983	5.28564	4.15674	7.41732	1.90183	9.15633	8.52391	6.4928	8.12258
0	28	6.42431	3.57652	5.07563	2.58941	6.48233	4.04937	7.44175	2.82423	8.8064	8.15038	5.59313	4.7458
0	28	7.63933	4.38772	6.0909	2.41651	3.9307	5.56732	6.20751	4.77986	9.9139	7.59884	4.8463	6.82144
0	28	7.37296	4.40642	4.83033	2.30631	6.22542	5.1495	7.37717	3.79099	9.45066	8.77242	5.85378	8.18535
0	28	6.7819	4.28799	4.8037	2.33716	6.3252	4.51162	7.57273	4.26668	8.48435	8.85929	5.60343	9.57748
0	28	5.8578	4.18006	4.83894	2.82254	4.58275	4.01659	6.20583	2.5369	5.63863	5.86639	4.78775	4.01827
0	28	6.50976	3.73891	4.4196	2.62691	4.56923	4.48039	7.04016	4.88499	8.34178	6.85546	4.7212	10.4471
0	28	7.7611	4.75976	5.95371	3.3844	4.14122	5.12338	6.49512	3.92479	9.28266	5.72368	3.70067	7.42215
0	28	6.47182	4.32946	5.01758	2.46596	4.6875	3.73815	6.38099	4.80292	8.88502	7.3148	4.41654	7.76668
0	28	7.98149	5.52306	6.1198	4.82937	4.61856	5.0667	6.55608	4.81416	9.85265	6.37766	4.85502	7.74913
0	28	8.29433	5.04149	6.25935	5.26006	3.9209	5.0116	6.14687	3.92138	10.0793	6.72457	4.70401	6.76946
0	28	8.02425	5.44873	6.511	3.96778	4.10751	5.00741	6.36296	4.65988	10.0802	6.17669	4.48981	9.93784
1	4	6.29814	4.88029	4.10795	2.64962	4.0215	4.12725	6.12234	2.62064	9.37964	6.50022	4.79457	6.11991
0	28	7.53284	4.91826	5.51084	3.80912	6.26448	4.99089	7.28711	4.94427	9.32251	8.80558	5.16037	7.03164
0	28	7.79762	4.41925	5.27305	4.18887	4.65315	4.95033	6.60946	3.60529	9.85438	7.60329	4.85541	6.12537
1	15	7.07387	4.20967	5.96275	2.53689	5.27761	4.58397	7.12247	2.59524	8.84976	7.60412	3.99023	3.96992
1	7	6.87208	4.81687	5.51288	2.37453	5.37901	5.927	7.52968	3.47997	9.1298	8.00881	6.90725	5.82597
0	28	6.14754	3.77297	4.89031	2.88012	4.06141	4.35995	7.10971	3.90511	9.03496	7.59674	4.14914	7.77277
0	28	6.72992	4.40112	5.06776	2.17219	4.89914	4.22729	6.40867	6.00166	7.9987	7.61247	4.33321	5.07692
0	28	8.32349	5.43761	6.41373	5.7773	3.78568	5.42072	6.39226	3.64161	10.1106	6.71044	5.10933	7.03027
1	12	7.95654	5.14497	5.62875	4.66935	4.14835	4.97613	6.21481	3.71044	9.7797	6.85083	5.52218	6.25386
0	28	7.46521	4.07693	4.38693	2.57395	6.22704	4.70902	7.63893	2.78124	8.08924	7.69356	5.75577	6.57954
1	8	5.92498	3.97407	4.08662	2.77415	5.38399	3.70681	7.3622	2.74074	6.35062	7.83531	4.96138	7.00571
0	28	6.7752	4.39443	4.31381	2.47576	4.12921	4.96127	6.74729	2.51871	9.49908	7.83883	5.81482	7.4864
0	28	6.00437	4.55785	4.59786	2.65129	5.51177	3.94834	7.21766	2.48038	8.14406	6.95959	3.85545	5.87402
0	28	5.9118	4.68318	4.30188	2.7775	2.86869	4.2313	4.88257	2.22395	8.37813	6.19975	3.65024	4.42437
0	28	7.04415	4.50651	4.76502	2.88916	6.27063	4.20446	7.47204	3.94901	9.32874	7.15229	7.74966	7.63381
0	28	6.20036	3.42261	4.57123	2.59753	6.0052	3.64227	7.41764	2.94838	7.77579	8.24662	4.6974	3.75607
0	28	6.75997	3.98785	5.35325	2.33085	5.71017	4.01868	7.13289	4.28129	8.10611	7.53299	4.50239	3.39379
0	28	7.28046	4.1196	5.08742	2.51072	6.54574	4.36767	7.87414	2.57842	9.20938	8.01625	4.63022	6.04602
0	28	6.84323	4.36781	5.4978	2.53906	6.87045	4.51526	8.05427	2.42247	8.60914	7.06168	6.49235	5.61281
0	28	6.40794	3.86462	4.53455	2.42468	6.08564	4.82526	7.86847	2.19011	9.49716	8.0292	7.25522	8.06154
1	15	7.91162	5.00918	5.637	5.34691	4.4036	5.47601	6.60691	3.27039	10.2417	6.83727	4.96059	7.39311
1	8	6.85223	4.48569	4.95239	2.38418	5.14844	4.92075	6.67522	2.64343	9.17804	7.80994	5.2365	8.00473
0	28	6.48056	4.09755	6.03258	2.42724	7.42398	4.23685	8.19918	2.51529	9.037	7.90398	6.14275	6.15244
1	0	6.73349	3.45087	4.92047	2.43316	5.53353	4.19236	7.07703	6.59818	7.766	8.15037	5.14029	5.50287
0	28	6.66552	3.86765	4.175	2.50081	5.54515	3.92083	6.72029	2.72419	8.93036	6.89498	5.70435	4.89857
0	28	6.78084	3.92105	4.51777	2.65463	5.07786	3.75878	6.85352	2.7434	9.80102	6.65017	5.39979	6.14105
0	28	5.93452	3.72763	4.22146	2.33904	5.16726	3.98011	7.92302	2.70598	8.60421	6.96712	5.20276	5.96069
0	28	7.50118	3.88858	4.62407	2.31991	5.65459	4.4015	7.54876	2.29996	8.65877	8.20486	5.47836	4.91289
1	0	6.2271	3.6968	4.82168	2.51468	6.40038	4.32992	8.27736	2.26798	7.65163	8.16228	4.8783	4.13321
0	28	6.73804	3.4717	6.06399	2.53133	6.22665	4.62888	8.03255	2.12916	7.63252	7.7114	6.63797	3.7172
1	2	6.59879	4.84495	4.71902	2.6454	5.84028	4.85422	7.72619	4.27829	8.77687	8.25484	6.53819	10.3698
1	13	6.44622	3.06454	5.73158	2.49939	5.82389	4.25428	7.10584	6.19327	8.36954	7.42456	6.62969	11.2999
0	28	6.55642	4.27098	5.12047	2.41982	5.64494	5.57671	7.71403	2.58385	9.51926	8.44587	7.14726	9.49317
0	28	6.85996	3.877	4.50479	2.27251	5.18677	3.39353	7.70853	3.55618	7.89245	7.80314	5.33185	11.6066
0	28	6.75769	3.79473	4.67071	2.58365	6.06413	4.47961	7.28251	2.15382	8.13829	9.05797	4.80451	6.00701
0	28	6.84826	4.38772	4.96683	2.30654	6.48592	4.48221	7.46014	2.20378	9.41798	8.37861	6.58278	5.33867
1	5	6.75778	3.55731	5.11669	3.03885	5.6341	4.18242	7.42227	3.11544	8.37444	7.26312	4.06578	3.57524
1	14	6.50295	3.27954	5.86529	2.50705	6.58608	4.40016	7.6093	2.63349	7.62018	8.61445	7.41684	8.77344
0	28	6.87691	4.76936	5.82962	2.21226	5.77858	5.439	8.19963	2.41368	9.43889	8.37242	6.36146	4.76182
0	28	7.13636	3.966	5.05168	3.14863	5.49273	4.24941	7.4919	2.33774	9.18396	7.64289	6.72854	6.09181
0	28	6.50811	4.31537	4.58316	2.33264	5.60348	4.37161	7.23113	2.5133	7.47866	8.32159	5.76364	5.59583
0	28	6.78452	3.8888	4.4722	2.56986	5.81156	4.85563	7.44402	3.7094	9.6129	8.12574	5.52951	5.45091
0	28	6.695	3.14575	5.69838	3.14556	7.79821	3.63961	8.25303	2.55953	6.99399	8.43648	6.90742	4.0824
0	28	6.56779	4.34285	4.71509	3.60589	5.19989	4.95375	7.18828	3.67566	8.8231	8.07401	5.48266	11.5253
1	6	7.74977	4.91795	5.38004	3.93169	4.85192	5.42097	6.37484	4.08645	9.58353	6.45877	6.25137	6.20862
0	28	6.6165	3.98134	5.07166	2.4005	5.70274	5.11855	7.7459	2.59323	9.6051	7.9891	8.28171	6.94385
1	3	6.69055	3.59351	4.67818	3.20297	6.10804	4.63602	7.11041	2.8671	6.95885	7.99089	6.95348	6.00517
0	28	7.30767	3.67328	5.03195	2.17764	4.87202	4.62412	6.52172	5.3339	9.45252	8.29364	5.39497	9.4424
0	28	6.6929	3.72141	4.55674	2.66065	6.20949	4.40608	7.73385	2.30227	8.43097	7.92766	6.43661	5.8873
0	28	6.73342	4.46534	4.92913	2.72557	5.87145	4.93513	7.27946	2.81405	10.0268	6.80062	6.67041	3.86148
1	2	7.50231	4.94963	5.11712	3.32066	5.16955	4.66834	7.40194	4.02755	8.72458	7.73005	6.55059	7.06307
0	28	6.9555	3.97417	4.70836	2.55754	4.2053	4.67917	7.10644	4.7065	10.5423	8.15381	5.44834	7.12291
0	28	7.00467	3.57007	4.53925	2.8748	5.12202	4.87838	8.15531	2.14218	8.35454	7.87589	4.96852	6.10917
1	2	7.05732	3.2286	4.93548	2.54454	6.38527	5.10954	7.82764	2.59691	8.36966	8.36225	4.85586	6.89441
0	28	6.76988	4.15666	5.44637	2.76009	6.32948	4.79927	8.40466	2.2806	8.82131	8.25441	6.15454	5.82314
0	28	5.55985	3.46317	4.8049	3.34411	5.25069	4.46864	8.06868	2.11379	8.61102	7.72256	5.54288	5.63886
0	28	6.36817	3.71787	4.7073	2.42306	5.92411	3.99029	7.53262	2.7744	8.00454	7.86226	7.57076	4.90091
1	3	6.16715	4.17283	5.06897	2.48466	5.4981	3.97014	7.52477	2.95446	8.7255	8.27102	4.89562	5.01415
0	28	7.14116	4.29198	4.5847	3.10795	4.75413	5.09392	6.80902	5.02996	8.2262	6.73548	6.59265	6.26353
1	3	5.84381	3.50822	3.76051	2.98246	5.54805	3.94742	7.05869	2.2336	7.31648	7.90028	4.62596	5.5808
0	28	6.09049	4.09061	5.21826	2.4364	5.85508	4.68157	8.42572	3.62228	8.71481	7.95633	7.86636	8.20476
0	28	6.8854	4.24856	5.58589	2.71889	6.01353	4.96853	7.99038	4.0641	8.69962	8.03686	4.16082	6.48074
0	28	5.78911	4.0613	4.63411	2.97513	5.04837	4.10326	7.70823	2.83572	7.98958	8.91317	5.61422	8.46981
0	28	6.89572	4.15018	4.91672	2.78922	6.54912	5.82012	7.54642	2.63095	9.11945	7.47147	7.03942	7.59602
0	28	6.86198	4.77114	5.07875	2.4282	6.24299	5.09421	7.58089	3.48791	9.17284	8.2925	7.47663	5.02831
1	12	7.0957	4.77677	5.24093	2.48468	5.37595	5.34466	7.71633	5.76455	10.0457	7.37667	3.90601	6.02175
0	28	6.97293	4.05812	5.10629	2.42773	6.0508	4.20655	7.85642	2.47383	7.82973	7.20727	4.33166	7.75974
0	28	6.65429	4.12243	4.94111	2.47073	6.11605	4.88816	7.92883	2.74769	7.59698	8.16442	8.41117	5.75399
0	28	6.66332	3.68996	4.67301	3.04094	5.85705	4.07608	7.72711	3.78428	8.18798	8.39435	6.10368	7.20099
1	1	6.82377	4.59716	5.15342	2.62326	4.36844	3.99823	6.62586	4.03494	7.96421	6.68366	3.48218	7.21759
0	28	6.64383	4.28946	5.54128	2.44226	6.38461	4.89812	7.81814	5.31349	9.30428	8.07175	5.89597	10.3515
1	1	6.72869	4.03946	5.60296	2.40007	3.06643	4.09707	6.59989	3.32227	6.80649	7.80267	5.77571	8.38485
0	28	6.91688	4.69795	5.64909	2.6954	4.74388	4.72733	6.76346	2.93731	6.2054	6.87577	4.38087	7.48236
0	28	7.91072	5.12055	6.48061	2.31436	5.20359	5.79916	6.92928	3.6047	9.61002	7.59702	4.37028	6.52808
0	28	7.12193	4.09675	5.45605	2.92441	6.02971	4.80652	7.90719	2.76218	7.97776	7.91747	4.15171	6.57324
0	28	6.26968	4.1252	5.29161	2.45422	6.24757	4.97232	7.94259	2.57248	8.50855	7.43339	5.16161	6.28614
1	1	6.37327	3.87584	5.20905	2.80029	5.99348	4.93037	7.58999	2.36228	8.76468	7.22577	6.87948	8.329
0	28	7.27944	4.8028	4.75013	2.71979	3.36912	4.33995	5.94667	4.40536	9.37667	5.92985	5.3583	5.81256
0	28	7.14835	4.0687	4.11907	2.24961	5.24218	4.33794	6.76562	2.50876	9.68965	7.78987	6.51814	5.36484
0	28	6.75602	3.57133	5.06704	2.31989	6.23529	4.33967	7.57476	2.91844	8.73347	7.72228	4.86847	3.77878
0	28	6.68727	4.01609	4.2785	2.91316	6.12236	4.11943	7.32262	2.95705	8.85476	8.12244	5.62683	4.16575
0	28	7.07029	4.45978	5.01981	2.5395	6.77596	4.42312	8.04328	2.44091	9.0544	8.12917	6.19951	8.97311
1	6	6.39476	4.27028	5.84323	2.52434	5.07772	5.16035	7.35346	3.60836	6.82917	7.54282	6.38968	4.91088
0	28	7.30128	4.27589	5.67654	2.46757	4.53315	4.70448	7.22692	3.42057	10.0842	8.23316	6.6199	8.4691
0	28	6.50886	3.88433	4.21947	3.03837	5.39834	4.13558	7.26503	3.20225	8.48382	7.6909	4.30983	4.10958
0	28	6.71359	3.22283	5.36499	2.45954	5.16736	4.43185	7.5532	2.70468	8.98463	8.71175	5.51575	5.20376
1	1	6.30855	3.59612	4.3672	2.58627	5.15138	4.21916	7.84344	2.251	7.95262	7.7388	5.83244	7.93969
0	28	6.43847	2.96536	5.74708	2.5004	5.87536	4.47378	7.88108	2.65813	6.9087	7.70757	6.08454	5.59736
0	28	6.88439	4.36521	5.13779	2.85324	6.09918	4.85711	7.81772	2.66712	8.52972	7.75347	7.87947	6.86219
0	28	6.33574	3.65981	4.43413	2.43564	6.00954	3.64825	7.39265	2.09853	8.87993	7.29617	6.76487	6.05011
1	1	6.43483	3.30413	5.82655	2.33319	7.11353	4.58022	8.22631	2.86997	8.73884	8.01466	7.14111	9.45617
0	28	6.26305	3.20153	4.85826	2.59483	5.96971	4.90797	7.76229	2.51346	7.69469	7.57633	5.05838	5.14388
0	28	6.72252	3.97773	4.45561	4.07751	5.59384	4.52242	6.79639	2.59744	9.79892	9.1193	8.63645	8.04317
0	28	6.58444	4.15497	5.2525	2.72852	6.34174	3.21683	7.66298	2.54516	7.29382	7.39263	5.6666	4.08327
0	28	6.6241	3.83484	5.31698	2.57625	6.24227	5.21698	8.0177	2.94041	7.14071	8.34444	5.61953	5.17144
0	28	6.20806	4.53475	4.24389	2.59124	4.74495	4.1297	6.51859	3.02541	8.51216	5.80544	5.84334	3.13255
1	5	6.83131	4.3792	4.80061	2.53493	5.51627	5.69444	7.45456	3.76069	9.33573	7.00044	7.34053	7.40778
0	28	7.02086	4.46725	4.8435	2.81693	5.47259	5.28817	7.19454	3.43256	9.28362	8.04358	5.94681	5.32443
0	28	6.7651	4.24136	4.9195	2.2565	6.58345	4.62034	7.91246	2.68726	8.5698	8.06711	5.43098	4.82283
0	28	6.25454	3.22567	5.96881	2.1689	6.49059	3.60659	7.33055	2.45398	6.9593	7.46158	6.17584	4.43643
0	28	5.36721	3.73229	3.89823	2.49793	5.57307	4.18238	7.37786	2.69169	7.39379	6.14492	5.69214	5.505
1	5	6.24662	4.33446	4.28119	2.56356	5.37967	3.49503	7.2316	2.39544	8.47307	6.93671	6.16139	4.70638
0	28	5.76782	3.78791	4.08505	2.59599	5.84778	4.78631	7.73286	2.13403	8.89108	7.72591	6.32915	9.98521
0	28	6.06597	4.16102	5.26955	2.63293	4.97007	5.2929	7.33238	2.48769	9.13669	8.24139	5.04196	8.4966
1	0	7.31082	4.35285	6.10663	2.74797	5.83502	6.13635	7.6197	3.28299	9.53639	7.4858	5.72034	8.26008
0	28	6.90987	4.93899	6.02	2.76831	5.89148	5.57232	8.24295	2.49635	8.19129	7.18891	3.72653	7.20672
0	28	6.60014	4.00214	5.0233	2.48528	6.52433	4.36717	8.00849	2.82484	8.97533	7.61024	6.93764	5.20509
0	28	7.07214	4.60651	5.56793	3.04432	6.95301	5.08887	8.06193	2.74418	8.4688	7.57068	5.23528	8.78869
1	3	7.29782	4.4865	5.47065	2.68929	6.38973	4.76861	7.67048	2.88139	10.624	8.21599	6.04017	5.13007
1	12	5.69412	4.40618	5.45289	2.6342	6.50627	4.62625	8.29917	2.5263	7.87757	7.92161	4.17362	4.09764
0	28	7.16262	4.59123	5.48684	2.47534	5.5559	5.05285	6.72161	5.38986	8.33846	6.66793	6.17583	5.51346
0	28	6.89755	4.42049	4.91846	3.06187	6.22641	4.20282	7.449	2.44867	8.80405	7.65514	5.74048	8.28032
0	28	7.45397	4.61185	5.63527	2.64	6.55718	4.83155	7.90436	2.6722	7.05584	7.38572	4.39813	6.1451
0	28	6.86264	4.17886	5.05185	2.95077	6.52266	5.44428	7.91571	2.26035	10.6137	7.76033	5.39635	5.78401
1	6	6.57729	4.21321	5.56582	3.56238	6.58699	5.08038	7.58582	3.54567	9.26105	7.96371	5.73551	6.08952
0	28	6.6664	4.38845	5.50041	2.68041	5.66475	4.75569	7.66374	2.70819	9.62244	7.90857	6.95405	7.53344
0	28	6.70963	4.04857	4.17238	2.34636	5.56234	4.50354	7.56144	3.01032	8.83007	6.78907	7.16593	3.31111
1	14	6.77185	4.27834	5.56405	3.09771	5.4108	4.90041	7.31917	2.47575	8.03479	7.48332	6.58647	10.4201
0	28	7.00268	3.80692	4.86163	3.38781	5.70064	4.18259	7.88498	2.22508	9.03639	7.86994	6.86552	6.59607
0	28	6.34234	4.05332	4.36127	2.60572	5.17163	4.55346	7.22123	2.7668	8.03757	7.63905	6.59487	5.27745
0	28	6.38586	4.8319	4.67563	2.69973	4.59126	3.84287	6.84742	2.91309	7.61782	7.73836	4.6674	3.72912
0	28	6.81883	4.47442	5.25648	4.53189	5.78626	5.86615	7.58496	2.69972	10.0716	8.35036	7.21049	6.41851
0	28	6.43998	3.38854	5.04136	2.74619	5.6214	3.70721	7.68807	2.75582	9.28425	8.16166	4.42352	7.48552
0	28	6.63733	4.9139	5.04612	2.58342	5.46558	4.16826	7.27848	2.89665	9.69878	7.44106	6.00441	7.59453
0	28	6.95877	3.06601	4.5795	2.64785	4.44768	3.76614	6.89939	7.13429	7.39503	9.16679	3.9925	10.9145
0	28	6.8782	3.9297	5.00745	3.39243	7.21695	4.16896	7.47178	2.29293	9.65747	8.01549	7.09809	5.38825
0	28	5.20003	3.55228	4.36889	2.58803	4.61384	3.87174	5.71005	3.03543	8.60093	6.93021	6.39709	8.97159
0	28	7.01992	4.52705	5.1654	3.08984	5.35657	4.66152	6.93436	3.97452	8.79545	6.22971	5.53586	5.51017
0	28	6.23761	4.06691	5.76103	2.34929	5.89896	4.96973	7.8421	2.68436	7.98116	7.54068	6.92637	4.39468
0	28	5.77657	4.13958	4.67131	2.4659	5.9557	4.02846	7.00854	2.78036	8.59582	8.40003	5.67104	4.25043
0	28	5.80351	3.20831	4.27659	2.40413	5.5306	3.06378	7.22999	2.20647	8.90407	7.46837	7.21027	8.22789
0	28	6.429	4.03081	4.53731	3.30771	5.09134	4.39943	6.65771	3.07164	8.92478	7.61309	6.40774	7.71922
1	4	7.06975	5.01685	5.03358	2.39127	5.08174	5.26466	7.31797	2.13841	8.93045	8.01987	5.70015	4.339
0	28	7.41071	4.55784	5.57562	3.66275	5.92955	4.52261	7.53217	3.40788	9.80415	7.37757	6.3098	10.0348
1	3	6.83217	4.15175	5.4309	2.60256	5.54967	4.42568	7.73616	4.38465	7.83831	7.42569	4.22292	10.4173
1	10	6.91529	3.71569	4.97659	2.52807	3.30634	4.14809	6.25914	5.99434	8.081	7.59133	6.49208	10.3769
1	28	6.03679	4.40027	5.24873	2.64025	5.12895	4.32594	6.80949	2.84345	8.1172	5.85319	4.98285	3.87081
1	15	7.42862	4.89829	5.81362	2.6653	4.10316	5.23271	6.50477	4.10456	9.51644	7.50299	4.14893	6.5735
0	28	6.42416	3.75439	4.90817	2.37456	5.16077	4.3256	6.86892	3.04253	6.54273	6.20168	5.97323	4.51825
0	28	6.94413	4.34744	4.89224	2.97631	4.59399	4.6416	6.58182	2.65019	9.85568	7.09951	5.47236	6.42946
0	28	6.62274	3.63263	4.93264	2.58633	5.31588	4.21455	7.60833	4.20486	7.89392	7.90834	6.3384	11.2566
0	28	6.39531	3.58571	5.34257	2.43571	6.36102	4.54724	7.10955	2.88504	8.98172	6.68452	6.21374	9.25944
1	2	7.01556	4.5003	5.14731	2.96649	5.55052	5.25722	7.20906	2.94247	9.7777	8.11662	5.1317	11.395
0	28	6.381	3.73911	4.29653	2.59711	5.55047	3.65257	6.96859	2.37593	7.93326	6.77039	6.66068	5.06021
1	18	8.10556	5.414	6.3091	5.76123	4.3998	5.25478	6.58478	3.28006	9.74289	7.05754	5.86	7.28238
0	28	5.89474	4.0168	5.03836	3.34275	5.8207	4.41254	7.26202	2.26198	7.72879	8.01481	4.68967	7.06096
0	28	6.73795	3.80788	5.53112	2.42496	6.21718	4.75521	7.64951	2.51892	8.43186	8.08826	7.04773	4.79181
0	28	6.55035	3.44016	5.28441	2.4181	5.48815	4.4147	7.65676	2.23127	7.46901	7.41352	6.48347	4.69507
0	28	6.57525	4.18515	5.1167	2.72736	5.94177	4.68127	7.40953	2.65281	9.51654	7.39376	6.90577	3.95499
1	12	6.13995	4.78876	5.07959	2.53423	5.31451	4.74526	6.95434	2.64047	7.91969	8.18204	5.84309	4.28017
1	7	6.41382	4.44192	4.67906	2.96779	6.63811	5.34567	8.01489	4.18926	8.90868	8.90674	7.21148	8.3452
0	28	6.41967	3.64149	5.57493	2.37553	7.17416	4.38388	8.09292	2.12063	7.6627	9.02502	6.74274	5.35272
0	28	6.01794	4.20639	3.95844	2.58497	4.6701	3.63159	6.52137	2.34716	8.66098	6.45791	5.26719	3.79991
1	4	6.71961	4.11473	4.89554	2.74858	6.59334	4.46664	7.77645	2.8874	8.55419	7.9588	6.45795	6.69738
0	28	6.77068	4.48728	5.32954	2.64209	6.37009	5.26726	8.11454	2.7255	9.09247	8.67249	7.55939	5.74294
1	3	6.06938	3.69355	5.70502	2.38021	5.68515	4.49689	7.78692	2.79691	8.81775	7.88449	5.76367	5.96487
1	1	7.11087	4.28493	5.30557	2.61095	6.3731	4.64271	7.12859	4.98721	8.13285	7.41227	6.95322	9.65349
1	2	6.93762	4.28805	4.6855	2.61769	4.30386	3.70083	6.09841	3.31403	6.65968	6.08641	6.64769	3.67166
0	28	7.07697	4.49214	4.75295	2.41452	5.06183	3.90657	7.2737	2.83194	9.17276	8.54488	5.95453	4.21308
0	28	6.87986	4.7156	4.73686	2.1779	6.13283	4.962	7.24979	3.06701	8.06296	7.6764	6.81781	4.81726
1	3	6.92622	3.95158	4.81085	2.52668	6.05228	5.14757	7.61698	4.49922	9.17675	7.64352	6.74369	4.62833
0	28	6.81236	3.27957	5.78301	2.32683	5.04195	3.86691	7.80471	2.48982	8.65937	7.58998	3.63649	5.9078
0	28	6.7629	3.98487	5.4753	2.39149	6.3381	4.41658	7.76624	2.35937	8.58818	7.63161	5.97065	6.43029
0	28	6.65965	4.60112	5.17014	2.50371	5.38989	4.66127	7.03618	3.62978	9.76933	7.22393	5.4126	4.45048
0	28	7.00196	4.27498	4.30462	2.77169	6.39953	4.3207	7.87006	2.40232	8.94513	8.4196	7.05685	8.55237
0	28	6.70374	4.54978	4.5403	2.51852	5.4378	4.31746	6.41878	5.72983	8.85688	6.70478	5.67323	9.69037
0	28	6.93304	4.04767	4.35451	2.94681	5.54196	4.83945	7.02787	2.45414	9.59109	7.48672	6.90941	5.54673
0	28	6.1936	4.68123	5.16126	3.04362	5.74748	4.91082	7.67921	4.13278	9.33797	8.34729	6.45288	10.6548
0	28	6.47072	4.80207	6.08339	2.4973	6.32759	5.36	8.19032	3.06522	7.41084	8.05466	7.77618	5.90863
0	28	5.96231	3.25194	4.71137	2.52893	6.18546	3.86374	8.26253	2.25121	6.97668	8.06226	6.27822	5.64943
0	28	6.764	3.96692	6.20002	2.32074	5.62805	4.57009	7.94718	4.46143	8.9073	8.55807	6.65539	8.945
0	28	7.01436	4.53684	5.26202	2.54503	6.29742	5.38067	7.91747	2.64158	8.99409	7.44041	7.43965	5.39323
1	23	6.98536	4.83753	5.61244	2.59335	5.03556	5.27052	7.31678	2.97698	10.2254	7.33128	6.33399	6.60851
0	28	5.8966	3.35992	5.09628	2.41214	5.24546	3.6603	7.06477	3.13362	7.29143	6.74896	6.24979	3.63646
0	28	7.00792	3.69538	4.99936	2.56204	5.41582	4.62832	7.26186	4.85475	8.40592	7.89494	5.48458	5.31534
1	6	6.35106	4.3226	5.08316	2.84604	6.50561	4.71972	8.31512	3.13149	8.16613	8.10177	8.03421	5.23606
1	12	7.23084	4.30464	4.83376	2.78523	5.60435	5.35951	7.57589	2.43976	9.40971	7.01004	6.01442	7.89843
0	28	6.94483	4.21467	4.57687	2.42528	6.17769	4.21124	7.72784	2.54472	8.94234	7.60955	6.76205	4.31455
0	28	7.16948	4.52182	5.59936	2.32184	6.17845	5.07658	7.06804	2.38678	8.26186	8.44596	7.39509	9.34626
1	7	5.79151	4.42126	4.90633	2.36526	5.15868	4.53578	7.72552	3.28188	8.19598	7.50451	5.74482	7.95162
0	28	6.75237	4.59704	5.13799	2.38097	5.52725	5.23216	7.89858	2.71478	8.47735	8.12169	5.65596	4.46278
0	28	6.14721	3.87322	4.42229	2.35952	5.0566	4.04653	6.94121	2.76742	8.48138	7.77948	6.0516	3.27664
0	28	6.46623	3.64467	4.97969	2.69577	6.22123	3.98443	7.65746	2.43311	8.45873	8.12009	6.92815	5.07083
0	28	6.60896	4.04809	3.72589	2.90677	6.26364	3.78058	7.582	2.14862	9.08367	8.271	5.60749	5.8983
1	14	7.64126	4.32906	4.86314	3.33394	6.64133	4.5361	7.78247	3.40019	9.98754	7.78633	6.68209	6.83635
1	27	7.88678	4.87296	5.51259	4.03279	4.11588	4.77847	6.65825	3.21519	10.3026	6.8957	5.63872	7.20267
0	28	6.5581	3.65802	5.0485	2.74357	5.51633	4.09452	7.69393	3.48707	8.22848	7.5148	7.2719	7.3557
0	28	6.99511	3.21305	5.51067	2.31955	5.85861	4.92021	7.24471	2.5653	8.65374	8.05296	6.26893	3.63509
0	28	6.67604	4.13304	5.11888	2.82033	6.10876	4.0534	7.47385	2.96789	8.27147	7.53413	6.15153	5.45461
0	28	7.4453	5.07344	5.32935	4.49758	6.07957	4.91393	7.67425	3.93868	8.99911	7.9264	6.00092	10.2595
0	28	6.24969	4.68679	4.96753	2.09586	3.88954	4.04118	5.30985	2.82541	9.39296	7.05668	4.68214	5.80309
0	28	5.96451	3.59001	4.95032	2.29878	5.41679	4.28201	7.01324	4.17925	8.43745	6.93103	6.31725	3.63914
0	28	6.94382	4.61359	5.86065	2.64117	5.10444	5.42298	7.55602	2.29564	9.88108	7.71911	6.45388	5.75761
0	28	6.78192	3.98765	5.44146	2.43709	5.52951	4.58801	8.29902	2.43214	7.99046	7.96271	6.23943	5.82176
1	16	8.21728	5.49034	6.02959	4.63224	3.69701	5.63822	6.20871	3.3595	10.7024	6.60046	5.4304	8.03385
0	28	7.16796	4.17534	5.43184	2.85572	5.97877	4.49926	7.50445	3.06271	7.53784	8.08282	5.9182	7.38662
0	28	5.92219	4.10451	4.04721	2.52877	5.63202	4.1075	7.03428	3.03973	7.90042	7.51108	5.87052	3.69114
1	7	6.12571	4.52517	5.62854	2.46731	5.26895	4.6209	7.67266	2.68789	9.45769	7.55754	5.8954	6.66297
0	28	6.14173	3.85433	4.55429	2.47764	5.94843	4.37021	7.57834	2.58131	8.39847	8.16033	7.33573	6.24779
0	28	5.83101	4.01559	4.77357	2.71821	5.44898	3.90151	7.01093	2.7747	8.69597	7.30691	6.8066	3.64816
1	3	7.0117	3.82989	5.71639	2.21635	5.32682	4.22146	7.02361	2.83744	9.71052	8.2347	5.95665	4.3403
0	28	6.11112	4.62618	5.02625	2.88203	5.95012	4.75224	7.77968	2.26244	8.29946	7.60771	6.06173	5.58829
0	28	5.8507	3.9513	4.99896	2.5579	5.94448	4.72956	8.3177	2.14459	8.22978	7.51542	4.91313	4.90726
0	28	6.08063	3.63012	4.83793	2.68689	6.04425	4.00579	7.84121	2.47317	7.14094	7.47767	6.55468	4.91146
0	28	7.13828	4.41202	4.31732	3.39293	6.06335	5.08419	7.66997	2.45746	8.11406	7.72903	7.67379	5.84698
0	28	7.221	3.72863	5.32981	3.62639	5.58072	5.25943	7.13222	3.05287	7.83117	8.36926	4.26458	5.88378
0	28	6.84335	4.03966	4.45087	2.67448	5.00327	3.97316	7.61822	2.9486	8.43424	7.42576	6.59085	6.89917
1	10	6.23817	3.31711	4.94485	2.47804	5.22707	4.3097	6.75975	2.4277	8.02648	6.67753	5.21971	8.79118
0	28	5.94459	3.81918	5.35395	2.22389	5.49694	4.41682	7.64631	3.27063	8.45131	7.75139	5.95347	5.57095
1	0	6.90507	3.09143	4.72022	2.48725	5.16495	4.35462	7.48057	1.9193	8.18778	6.9271	5.70627	5.27041
0	28	6.55584	4.23972	4.56517	2.49042	5.46138	5.00806	7.1958	2.78993	7.9525	7.67933	5.61435	7.61535
1	10	8.21857	5.41576	6.3932	5.14475	3.99766	5.44522	6.3366	3.73726	11.2161	6.78228	5.14226	7.79593
0	28	6.90822	3.6916	5.13941	2.36269	5.3011	3.85238	7.10501	3.12038	8.96532	7.37255	4.40674	3.53983
0	28	6.42254	4.20451	4.26238	3.2867	6.44342	4.32031	7.70524	2.4843	8.12948	8.43813	5.5927	6.32845
0	28	6.09885	3.55632	4.49919	3.28076	5.19688	4.50962	7.03253	2.72072	8.53396	7.07873	4.59665	7.92277
0	28	6.85053	3.45669	5.67454	2.45124	5.87918	4.05481	7.3182	2.71888	7.72137	7.09034	5.61817	3.9881
1	2	7.64022	5.23539	5.55717	3.05381	4.05238	4.95923	6.2637	3.47649	10.1009	6.77533	4.43101	8.38367
0	28	6.42116	3.76703	4.2718	2.75868	5.61301	4.21024	7.55642	2.16746	8.45477	7.68169	5.01266	4.40922
0	28	7.36661	4.34244	5.44071	2.53886	6.53824	4.70599	6.81492	2.29407	7.91954	7.67013	6.8567	4.03818
0	28	5.66083	4.16856	4.10521	2.53483	4.8787	4.01872	6.60597	3.241	8.1667	6.7593	6.71565	4.57078
0	28	5.85656	4.06166	3.92951	2.58033	5.78193	4.09308	7.62103	4.97013	8.8316	7.92996	5.55479	11.4251
1	0	7.18732	4.58312	4.64184	3.17792	5.97321	4.29418	7.33129	4.26811	9.74108	7.57262	6.14879	11.144
0	28	5.84284	3.94013	4.80709	2.59164	5.791	4.09532	7.21071	2.7638	6.19088	6.76702	7.36615	4.42152
0	28	5.86445	3.2446	4.71566	2.72494	6.32931	3.79574	8.20173	2.4159	7.48401	8.0312	5.23163	5.04137
0	28	6.60572	4.26566	5.78149	2.45039	6.17641	4.70293	7.934	2.47117	8.40322	7.39475	6.97064	5.33322
1	21	7.73492	5.12686	5.80849	4.36449	3.65928	4.90246	6.06289	3.51278	10.335	6.63103	5.00452	6.60755
0	28	6.47602	4.20945	4.91627	2.23442	5.37261	4.2822	7.20469	2.82998	8.15162	6.86977	6.17875	3.85357
0	28	6.55093	4.50457	5.31571	2.93021	5.67011	4.45563	7.73075	3.26808	9.05845	7.0554	5.35972	5.14124
0	28	6.35995	3.29973	4.46407	2.23247	5.94004	3.94122	7.13642	2.68852	8.31149	7.51409	4.85916	6.19452
0	28	6.77649	3.56566	3.85904	2.94821	4.51946	4.13697	6.85432	5.93454	9.2851	8.06627	6.83286	11.6939
0	28	6.73833	4.76509	4.35124	2.30296	3.43078	4.16138	5.53684	4.84766	10.4883	7.52783	5.07702	9.25453
0	28	5.62071	3.57651	4.64869	2.83913	4.73344	3.06273	7.44252	3.30661	7.87854	7.8938	4.19811	8.42632
0	28	6.87101	4.63154	4.12478	4.34304	5.70125	4.54393	6.82178	2.78918	9.56091	7.50612	6.7561	10.0986
0	28	7.14892	3.95389	5.1242	2.46963	6.55864	4.88274	7.58127	2.88034	8.18681	8.32372	4.83531	7.44834
1	11	6.47055	4.03524	4.82811	2.41352	6.50342	4.37684	7.96698	2.21628	8.21628	7.85602	5.53615	5.46928
1	0	7.08966	4.41266	5.28522	2.51408	6.43141	4.41752	7.52089	2.694	9.00759	7.88161	4.61441	3.43807
0	28	6.21278	3.12432	5.20527	2.33927	5.97826	3.77593	7.82548	2.11285	7.13964	7.6693	4.40308	3.04691
1	1	6.72446	3.85562	5.33621	2.86202	5.27615	4.10933	6.93463	2.81133	10.1674	7.45489	5.57314	4.05469
0	28	6.91207	3.98967	5.94628	2.3877	6.30783	4.36508	7.93451	3.32685	7.6283	8.20582	5.73961	4.14118
1	1	8.07798	5.5142	6.00096	4.11966	3.81796	5.02126	5.98434	3.52644	10.1866	6.42698	4.98262	8.08356
0	28	5.91978	3.29461	4.86483	2.49081	5.94754	3.96831	7.54788	2.91095	8.29453	8.45885	3.59219	4.80283
0	28	6.13194	3.69169	5.47902	2.31635	6.09254	4.64246	8.18099	2.26638	7.28258	8.38526	5.60556	6.4401
1	25	6.79736	3.98094	5.23506	2.61045	6.75049	4.51798	8.08273	3.57711	7.04948	8.96903	3.93625	5.15373
0	28	6.91889	4.13707	5.61861	2.39474	6.29044	4.30106	7.44356	3.00037	9.87271	7.78967	7.12523	5.1874
1	5	6.22373	3.35795	4.90624	2.92846	6.10721	4.67955	7.63014	2.92064	8.71847	8.36898	4.84633	8.18266
0	28	7.0853	3.78721	5.0779	3.06565	6.25689	4.70644	8.22861	2.48928	8.9724	7.9318	3.95192	7.35635
1	2	7.88587	4.77408	5.86079	4.34577	4.96039	5.31833	7.08102	3.14164	10.1972	7.29371	5.48071	7.65406
0	28	7.34119	4.34728	5.07023	2.67525	5.74021	5.10134	6.52683	2.75746	9.98347	8.45779	6.56874	6.4171
0	28	6.14062	3.65101	4.99341	2.49718	5.6407	5.30127	7.55298	2.80412	8.74407	7.95299	7.51683	6.96805
1	1	7.20616	4.81107	5.13446	2.40932	6.76648	5.21224	7.6269	2.52672	9.73967	8.35345	7.21512	6.31472
0	28	6.38498	3.43425	6.03119	2.43252	5.70132	4.58742	7.94066	3.33974	7.58694	8.71102	5.25229	8.067
0	28	7.3297	4.11037	5.27412	3.52815	5.93444	4.95038	7.93553	2.64525	8.65565	7.86835	4.47887	5.9737
1	2	6.03903	4.05854	5.02173	2.27231	5.78483	4.82982	7.56918	2.70342	7.8473	7.0006	4.36883	7.41438
1	8	6.73348	3.70951	5.07795	2.45925	5.87609	4.48488	7.16448	3.10091	9.02874	7.61179	4.27077	5.90138
0	28	6.77302	3.82858	5.1783	2.23859	6.52679	4.72332	7.67736	3.34061	8.03952	8.69251	4.73747	4.68969
0	28	5.71837	4.27218	4.31203	2.25746	5.34223	4.44751	7.67447	2.31165	7.87432	7.32648	5.72412	4.28319
1	0	6.46405	4.41005	4.33296	2.53804	5.8095	3.90316	6.30027	4.85205	9.51767	7.57763	5.50657	8.9931
1	8	6.61599	3.7594	5.64439	2.17008	4.51234	4.26826	6.91847	3.78058	7.37931	7.89979	5.0478	6.53068
0	28	6.55401	3.62434	4.70948	2.73386	6.05579	4.72441	7.66052	2.68217	7.77504	7.84303	7.08204	6.74185
0	28	6.54016	4.12884	4.81122	2.59452	6.76815	4.46336	8.02242	2.26246	8.54554	8.41692	6.12669	7.19845
0	28	5.85594	3.17398	3.87175	2.36461	6.38045	3.47393	6.70592	2.25293	8.17503	6.24914	3.63928	5.77186
0	28	7.24065	4.81196	5.63735	3.52342	5.29768	5.08854	7.13279	3.74589	9.08148	7.08446	5.93587	7.3568
0	28	6.79012	3.97476	5.1769	2.59888	6.23728	4.02178	8.36728	2.19222	8.47185	7.77328	5.44954	5.70655
0	28	5.90878	3.92793	4.30666	2.4878	5.11413	3.97427	6.9208	2.47763	8.74158	7.0365	5.99939	8.88244
0	28	6.76818	4.0801	4.90648	2.51024	6.13081	4.71678	7.89046	2.13105	7.81216	7.85995	5.38723	5.46079
0	28	6.88626	4.42769	5.25186	2.95767	6.75232	5.11017	8.02617	2.84177	9.11794	8.77879	7.52392	5.22882
1	15	8.0291	4.69117	6.13661	3.72909	3.84113	5.13844	6.37071	4.33673	10.0822	6.46644	5.26018	9.29319
0	28	6.87212	4.15181	4.63262	3.44268	6.17271	5.20954	7.3312	2.46715	8.79398	7.76632	6.62354	5.21101
0	28	7.12707	4.5295	5.74379	2.65072	5.78214	5.56021	8.06817	2.50949	8.64318	8.2974	5.15769	7.85182
0	28	6.78117	4.19226	5.25771	2.59707	5.59866	4.19827	7.84267	3.33595	9.55638	7.82078	4.44376	3.85629
1	11	8.03017	5.13951	6.14539	2.84826	4.09772	4.83886	6.25375	4.41925	9.70902	6.64533	5.12802	8.69217
1	2	7.99035	5.1206	6.31505	3.64972	3.77272	5.30295	6.33468	4.7071	10.2984	6.93063	4.96186	9.25702
0	5	6.98378	4.56736	5.45586	2.18262	5.9567	4.40605	7.17373	2.77341	8.1054	6.52749	7.46722	6.28838
0	28	6.5051	3.78862	5.31814	2.47978	5.71489	4.30704	7.69346	2.96866	8.24541	7.89504	4.51956	4.95523
0	28	5.15542	3.59373	4.06604	2.38456	4.58969	3.26674	7.15221	7.58436	6.77255	7.54336	4.00748	11.0135
0	28	5.75292	3.85542	4.5869	2.39792	6.47548	3.97577	7.36685	2.4345	8.79613	7.48894	6.08592	5.02404
1	1	6.58289	3.24516	4.63346	2.64559	6.26741	4.47394	8.02586	3.15093	7.44022	8.95266	5.4815	5.37052
1	18	6.46612	3.5198	5.31118	2.59313	5.83386	3.83514	7.29087	2.2119	7.661	7.64554	6.33692	6.03984
1	19	5.71089	3.64694	4.2142	2.58281	3.4214	4.516	5.81252	6.131	6.98737	6.56142	6.20629	9.6841
0	28	6.48681	4.33596	5.27702	2.60832	5.09973	5.05896	7.44192	3.82275	9.93017	8.3096	6.17204	6.28075
0	28	7.75054	5.03441	6.03679	2.56239	4.78609	5.33817	7.57679	3.42486	9.22689	7.93578	6.27348	6.19953
0	28	6.01634	4.60238	4.74053	2.58285	5.17001	4.69894	7.45114	4.13777	8.43088	7.46275	6.55394	4.87084
1	1	6.53264	3.63836	4.73517	2.53486	5.83873	4.80957	7.45267	6.25443	9.23692	8.98372	4.4024	11.199
0	28	6.88928	4.1651	4.77115	2.91578	5.84835	4.26415	7.42337	2.70897	9.42763	7.3543	7.2164	5.10648
0	28	6.77052	4.3721	5.03832	2.47496	7.7201	4.63407	7.4444	2.91949	8.97409	8.22138	7.02633	5.09127
0	28	6.72533	4.95636	4.96083	2.59365	5.49143	4.3238	7.18912	3.37318	7.631	7.57396	5.41519	6.97647
0	28	6.64551	4.68074	4.99481	3.63843	4.34664	4.52501	6.10079	3.67243	9.57264	6.23127	4.93181	7.03833
0	28	5.45078	4.33644	4.6396	2.497	5.56949	4.34004	6.75905	2.28649	8.9846	7.12713	6.22847	4.73911
0	28	6.8178	4.23023	5.55213	2.23681	6.9796	4.62596	7.40618	2.47751	9.46775	8.17939	7.51317	5.40358
0	28	6.4247	3.72057	4.83576	2.3504	6.32574	4.34847	7.88786	2.37596	8.67108	7.7664	6.81543	5.71175
0	28	5.66051	3.17722	4.29444	2.83962	6.00363	3.8848	7.56186	2.58013	6.62524	7.00279	5.64521	5.77507
0	28	6.89968	3.7644	5.06015	2.83582	5.75951	5.50958	7.91618	5.46852	8.49367	7.9675	5.17487	6.6295
0	28	6.72036	3.23202	5.4449	2.70237	5.98362	4.07752	7.59172	2.39128	7.91268	7.04572	6.56862	4.04322
0	28	7.00617	4.21802	5.12105	2.6162	5.1215	4.28855	6.97616	2.73529	8.51506	7.69403	6.35852	7.51701
0	28	5.72966	3.95102	4.13835	2.20879	5.41026	4.01255	7.00446	2.3442	8.20158	7.61045	6.8916	3.19802
0	28	7.30345	4.90898	5.68404	2.39702	7.10922	5.32968	7.85458	2.28784	9.86654	8.15378	8.09522	4.68635
0	28	6.49876	3.82521	5.07493	2.39574	5.14845	5.49999	6.88343	4.20837	5.27403	6.77564	5.69968	3.86605
0	28	6.91646	4.01137	5.4574	2.66173	5.81972	4.87435	8.10031	3.01236	7.81515	7.75374	6.39838	6.94138
0	28	6.85001	3.32574	5.25611	2.32372	6.27505	4.28915	7.86281	2.98248	8.85179	8.86389	5.30196	3.98885
0	28	7.0747	3.96892	5.08399	2.20966	5.7497	4.70919	7.44157	2.49968	8.8328	7.63186	6.77211	5.16985
0	28	6.30771	4.09971	3.74391	2.52749	3.88897	4.33393	6.49407	6.56408	8.39366	7.94982	3.69593	6.65237
0	28	6.68348	2.77481	4.80918	2.80969	5.72877	3.82441	7.81564	4.47249	7.41127	8.26582	4.92213	7.62314
0	28	6.80576	4.69544	4.68384	2.69606	4.44479	3.99406	6.78272	3.46397	9.03047	7.44743	6.77261	5.08288
0	28	6.38893	3.56467	5.37659	2.43418	6.93392	4.41031	8.60897	2.42001	7.56436	8.07726	7.07919	5.28592
0	28	6.80262	4.70523	4.93662	2.33788	5.85856	4.81063	6.66113	4.28333	8.99387	7.9589	6.00721	8.65619
0	28	6.68403	4.2834	4.69996	2.33033	6.07725	4.38475	7.12582	3.28736	7.85971	8.14931	5.77422	4.45131
0	28	6.30981	4.15951	4.43126	2.6221	5.43357	3.7245	7.1401	2.55726	7.92017	6.66736	5.26438	3.83446
0	28	7.02118	4.05363	5.26951	2.41815	6.57194	3.76763	7.15729	3.19016	9.1265	7.56859	6.69063	5.02247
0	28	6.64205	3.47944	5.24749	2.81757	5.56855	3.7847	7.31885	3.62525	9.4771	7.50426	5.38	3.60862
0	28	5.24845	3.61319	6.14172	2.60896	6.05614	4.83197	7.6922	2.21917	8.43104	7.30057	6.59224	4.45473
0	28	5.90362	3.64668	4.57831	2.33369	5.00372	4.72971	7.10712	2.93644	6.77496	7.42031	7.34654	8.5788
0	28	6.86224	4.15144	5.82559	2.44452	6.56216	4.52901	8.00411	2.60893	9.03655	7.30544	6.80793	6.10839
0	28	5.8263	4.4803	4.73085	2.42367	5.39763	4.57879	7.89272	2.24852	9.18237	7.96692	5.6891	3.74425
0	28	6.52252	3.64991	6.10733	2.62371	4.6848	4.38654	7.41949	2.70883	8.00398	8.21194	5.24795	10.5968
0	28	7.00661	3.85142	5.51848	2.61831	4.47253	4.61797	7.30963	4.4587	8.33963	8.34478	5.57843	9.11595
1	8	6.00604	4.03502	4.42263	2.63464	6.50646	3.49495	7.09699	2.6727	8.66925	7.14735	6.66794	3.59179
0	28	6.89743	3.54707	5.88836	2.28258	6.57799	4.01042	7.38786	2.36189	8.08022	7.70156	6.8227	3.81095
0	28	6.45162	3.78486	4.98372	2.61271	5.70908	3.80824	7.55896	2.35717	8.88386	7.11357	4.90221	5.11437
0	28	7.17492	4.66185	4.98797	2.45448	4.46096	4.63315	6.72487	3.38637	8.34371	8.0114	4.95303	5.8814
0	28	7.20138	4.53881	5.68615	2.41859	5.45231	5.23042	7.58229	6.00812	8.60547	8.43902	5.54479	6.2348
0	28	6.52093	4.37378	4.20534	2.95186	4.52721	3.89951	6.40621	2.42471	8.60311	7.01078	5.90977	3.7222
1	17	8.06721	5.1917	6.28031	3.29659	4.83252	4.93329	6.52276	3.21035	10.0702	6.79912	4.81251	8.04605
0	28	6.49736	3.6653	4.32219	2.66839	5.43557	4.69683	7.28731	2.69927	9.31207	7.91822	5.16623	5.81458
0	28	6.21282	3.92096	3.8405	2.4	5.44904	3.98479	7.45742	4.39662	8.32318	8.11031	6.16687	3.95002
1	20	8.02492	5.03873	6.0083	3.69649	4.05427	5.44207	6.61788	3.35313	10.0209	6.66682	5.6388	6.21231
0	28	5.95136	3.586	4.72715	2.88255	5.86498	4.27402	8.13198	2.33455	8.14117	8.79102	4.4933	7.10507
0	28	6.42103	3.6814	4.41652	2.85094	6.48111	3.29225	7.48129	4.25551	7.8175	8.07687	4.96794	10.9992
0	28	6.20607	4.04735	5.3441	2.83477	5.63861	5.19751	8.04993	2.55414	8.5341	8.44007	6.28746	6.07167
1	1	6.66461	3.77623	3.98999	3.19166	5.41888	3.80269	7.44476	2.36582	8.32334	7.42894	5.58708	6.5013
1	13	7.93845	5.07077	6.28564	4.38419	4.18557	4.98185	6.47827	3.65431	10.0616	6.78768	5.01305	8.51174
0	28	6.76437	4.09549	4.46712	2.49812	5.48298	4.43468	6.09043	3.99403	9.45522	6.79091	5.18691	10.1123
0	28	5.94676	3.66338	4.98374	2.91972	5.98308	4.41311	7.48013	2.75256	9.74826	7.92698	6.60739	8.48401
0	28	6.83341	4.44171	4.97882	2.67059	5.44636	4.43851	7.79707	2.52839	9.23703	6.89819	5.66049	7.53975
0	28	6.57877	4.21343	4.73506	2.88931	5.4935	4.30355	6.97808	2.78161	9.12162	7.47205	6.48615	8.28923
0	28	6.07742	3.81826	5.56708	2.28937	5.33565	4.20751	7.47724	2.29542	6.79188	7.39385	6.15578	4.94951
0	28	7.1935	4.57817	5.05223	2.72614	7.00806	4.62797	7.61042	3.13921	9.43568	8.15182	6.057	6.05465
0	28	6.51069	4.66362	4.98529	3.34824	5.37007	4.83216	7.42011	2.99964	9.1032	7.76289	6.27472	9.09849
0	28	6.77883	4.21141	5.52834	3.23025	6.43056	4.60695	8.26254	2.69071	8.02509	7.86701	7.99837	5.86294
0	28	6.17719	4.09161	4.29631	2.31971	5.93546	3.94486	7.84686	2.15988	8.2416	8.88674	6.47027	9.00022
0	28	7.31444	4.70532	4.18527	2.61566	5.31547	3.56998	6.94714	3.5375	9.5803	7.21128	6.13723	7.79491
0	28	6.54275	4.08946	5.14374	2.44576	5.25668	4.5231	7.32903	3.43099	8.69472	6.91666	5.71624	6.36316

## Sheet: Prognostic markers-COX
outcome	time	AAK1	MTHFR	STAT5B	HPSE	MX1
0	28	4.97322	5.01623	6.33295	3.32382	7.07319
0	28	6.32559	3.93241	8.11706	6.27988	10.0941
0	28	4.67342	4.5891	6.95138	7.56888	4.83232
0	28	5.39613	4.32141	7.74227	5.81924	5.27904
0	28	5.51027	5.13683	7.92792	5.21209	8.16937
0	28	4.91597	4.80283	7.69908	6.87686	8.43913
1	4	4.86381	5.23106	7.1844	7.02405	4.97492
0	28	6.08208	5.06919	6.70322	5.10538	6.92209
0	28	5.68912	5.43294	6.67205	5.13505	9.63485
0	28	4.75349	5.0353	7.05241	6.0032	5.58025
0	28	5.68579	5.01156	6.7675	5.23524	8.16087
0	28	5.65587	4.81754	6.6171	5.55705	6.78619
1	17	5.88862	5.17742	6.98533	5.60265	9.72924
0	28	3.8554	3.71177	6.3382	4.59991	3.54653
0	28	4.48926	4.1167	7.68075	6.01769	6.30954
0	28	5.06675	4.05441	7.43512	7.7085	4.05568
0	28	4.37167	4.76315	7.40327	5.93102	6.91333
0	28	4.82377	3.98268	7.80586	5.80668	6.546
0	28	4.22665	4.11176	7.22306	4.89753	4.81356
0	28	4.30787	4.27713	7.3989	5.24397	5.60846
0	28	4.24216	4.15841	5.18684	8.57333	6.51714
0	28	5.05506	4.47659	8.41359	4.78668	5.33025
0	28	4.25439	4.35578	7.94551	4.6366	8.42388
0	28	4.8007	4.96108	7.51318	7.47225	5.2165
0	28	5.3609	5.00952	7.14445	5.547	5.94202
1	12	5.33785	4.5732	6.52335	6.43462	9.69925
0	28	4.58307	4.55647	7.16628	7.20854	5.0602
0	28	4.35535	4.5776	7.84652	5.63805	4.94294
0	28	4.27221	4.43623	6.81332	6.42662	5.39371
0	28	4.90187	4.06007	7.29325	6.55801	4.98948
1	7	4.96314	4.35415	7.00205	5.8939	4.047
0	28	5.25429	4.09026	7.26586	6.55487	3.87775
0	28	4.80888	4.46902	7.43305	6.63119	4.51723
0	28	5.27012	4.43897	6.98802	5.53246	8.05288
0	28	5.59729	5.12255	8.11786	7.14135	7.08238
1	11	5.77835	5.21045	6.18162	4.87116	7.93419
0	28	5.10659	4.10063	7.92926	7.44136	5.28575
1	14	4.22715	4.12315	6.5976	5.55188	10.0611
0	28	5.28519	5.46259	7.79588	4.18304	9.36038
0	28	4.75975	4.55224	7.42928	7.58955	5.07981
0	28	4.25175	3.91075	7.30089	4.00591	4.85369
0	28	4.86545	3.79121	7.65248	5.52708	3.9924
0	28	3.03057	3.75326	4.92523	4.46109	4.69027
1	15	4.93261	4.63055	6.83196	5.02388	6.66937
0	28	5.42069	5.28076	7.36088	6.42514	7.93012
0	28	4.46524	3.68704	7.9994	6.40472	6.0947
0	28	5.65743	4.18107	7.64381	6.92846	4.28465
1	1	4.90158	4.03958	8.22385	4.44772	6.10061
0	28	4.43982	3.64625	7.85621	4.49091	7.17712
1	2	6.07338	5.08664	6.54738	4.64677	7.53809
0	28	5.12396	4.14187	7.13745	6.95908	5.86814
0	28	4.60345	4.26327	6.72287	7.27124	4.57634
0	28	4.8975	3.89402	7.54017	4.73332	4.94024
0	28	5.97837	4.94675	7.18654	7.1419	10.4426
1	0	5.77596	4.63595	7.44933	4.49021	7.86568
0	28	4.55042	4.14725	7.93646	6.60382	3.92601
0	28	5.3326	4.58472	7.71495	6.31787	4.5658
0	28	5.02769	5.06338	7.21717	6.47407	7.382
0	28	4.50398	4.79143	6.58602	6.26776	3.72345
0	28	5.50958	3.9032	7.11012	7.28995	6.36112
0	8	3.95935	3.73874	7.73906	5.38809	6.10661
0	28	5.00701	4.98213	8.37686	6.44154	5.10582
0	28	5.14307	4.74662	8.29832	6.05456	6.146
1	17	5.74955	5.31281	6.49625	5.48186	7.15451
0	28	6.0247	5.14118	7.29927	7.00994	5.12306
0	28	5.10687	4.93634	7.89099	6.22409	5.73367
1	0	5.304	5.43993	8.55189	5.30307	3.87583
1	8	5.99799	5.95716	6.89331	5.94422	6.54808
0	28	4.61582	3.50535	5.75182	3.74368	5.68348
0	28	5.46536	3.79554	8.21486	6.21885	6.19164
1	1	6.42267	5.17676	6.25433	5.06629	7.16886
0	28	5.81323	5.17515	8.41361	6.7727	5.55183
0	28	4.93224	4.4571	7.97356	5.72612	5.22372
1	0	5.1085	5.09972	7.30801	5.84997	5.47538
1	14	6.1728	4.77432	7.5754	4.75485	3.75373
0	28	5.5124	4.68998	6.4409	7.66102	10.3719
0	28	5.93846	4.29771	7.20855	6.19307	4.02183
1	20	6.25275	5.3048	6.52949	5.24829	7.11638
1	15	5.50886	5.06396	6.43461	5.32989	7.3644
0	28	4.64123	4.23549	8.09623	5.81849	4.40755
1	22	5.16797	5.12289	6.84346	4.06254	10.2776
0	28	4.64405	5.32032	5.84058	5.71139	7.64146
0	28	4.32035	3.359	7.14927	4.88175	8.12922
0	28	4.63377	4.0964	6.87613	6.43939	6.71679
0	28	4.55644	4.92356	7.79056	7.44942	6.70012
1	28	5.63677	4.17163	7.28336	5.98443	7.80147
1	16	6.46071	5.21066	6.76337	4.65412	7.28433
0	28	4.86521	4.49702	7.56176	6.76149	10.4345
0	28	5.00463	4.30234	6.74802	5.77391	5.42545
1	8	4.57237	4.46287	6.81386	6.79105	6.71635
0	28	4.89826	4.26754	8.59278	6.29246	7.66101
0	28	4.62014	4.48957	7.56808	7.32912	4.46577
0	28	4.84605	5.05992	8.50993	6.30614	6.55924
0	28	3.77901	3.01893	4.27174	7.68506	3.59371
0	28	4.76807	4.8489	6.95378	6.51824	4.09452
0	28	5.84396	5.4315	7.15336	4.36473	4.77488
0	28	4.68557	4.09746	7.63963	5.39828	6.43565
0	28	4.48836	3.14971	7.33757	4.8507	4.14282
0	28	5.67875	4.55521	7.16379	3.45771	7.38455
1	6	5.73597	4.88254	7.64479	5.45974	6.27035
0	28	4.86101	4.21247	8.1711	7.21399	9.91365
1	12	5.88552	4.87031	6.45328	4.77061	8.2062
0	28	4.74449	4.05131	8.34248	4.91054	4.01643
0	28	5.74944	4.70765	6.58655	6.00202	8.45161
0	28	5.56773	4.66458	7.4618	6.17359	6.35548
1	7	5.55905	5.25523	7.92165	6.2105	5.92288
0	28	5.91417	3.96488	7.61612	7.25484	9.54317
0	28	4.82824	3.72902	7.45308	4.97901	6.32056
0	28	5.61829	4.08197	7.78567	6.93935	9.48248
0	28	5.28683	4.81626	7.51405	5.16458	7.21716
0	28	4.44165	4.35221	7.04898	5.94501	8.39294
0	28	5.45883	4.46837	7.45072	5.94507	5.78814
1	11	6.07547	5.29447	6.62813	5.28812	7.57692
0	28	4.73844	4.17904	6.93349	5.60665	10.0598
0	28	3.28684	3.34782	6.97963	4.74359	8.57411
1	0	3.96529	3.3619	6.46437	4.68481	9.07768
0	28	5.82888	4.44046	7.16417	4.53553	5.05204
0	28	4.99393	4.06606	7.64296	6.02124	9.93949
0	28	4.69326	4.00772	7.26017	6.05086	4.58576
0	28	4.30995	4.51934	7.59092	4.95563	4.23036
0	28	4.36258	3.32911	7.88129	6.21712	8.85779
0	28	5.1299	4.6504	6.72214	5.25819	5.70834
0	28	5.13179	3.8859	7.57116	5.55817	10.3602
0	28	4.83318	4.82043	7.5703	6.01196	4.61384
1	13	4.81265	4.34619	7.0189	5.40791	3.88469
0	28	4.339	4.8792	7.89938	5.13106	5.53107
0	28	4.75025	4.15674	7.41732	6.4928	8.12258
0	28	5.07563	4.04937	7.44175	5.59313	4.7458
0	28	6.0909	5.56732	6.20751	4.8463	6.82144
0	28	4.83033	5.1495	7.37717	5.85378	8.18535
0	28	4.8037	4.51162	7.57273	5.60343	9.57748
0	28	4.83894	4.01659	6.20583	4.78775	4.01827
0	28	4.4196	4.48039	7.04016	4.7212	10.4471
0	28	5.95371	5.12338	6.49512	3.70067	7.42215
0	28	5.01758	3.73815	6.38099	4.41654	7.76668
0	28	6.1198	5.0667	6.55608	4.85502	7.74913
0	28	6.25935	5.0116	6.14687	4.70401	6.76946
0	28	6.511	5.00741	6.36296	4.48981	9.93784
1	4	4.10795	4.12725	6.12234	4.79457	6.11991
0	28	5.51084	4.99089	7.28711	5.16037	7.03164
0	28	5.27305	4.95033	6.60946	4.85541	6.12537
1	15	5.96275	4.58397	7.12247	3.99023	3.96992
1	7	5.51288	5.927	7.52968	6.90725	5.82597
0	28	4.89031	4.35995	7.10971	4.14914	7.77277
0	28	5.06776	4.22729	6.40867	4.33321	5.07692
0	28	6.41373	5.42072	6.39226	5.10933	7.03027
1	12	5.62875	4.97613	6.21481	5.52218	6.25386
0	28	4.38693	4.70902	7.63893	5.75577	6.57954
1	8	4.08662	3.70681	7.3622	4.96138	7.00571
0	28	4.31381	4.96127	6.74729	5.81482	7.4864
0	28	4.59786	3.94834	7.21766	3.85545	5.87402
0	28	4.30188	4.2313	4.88257	3.65024	4.42437
0	28	4.76502	4.20446	7.47204	7.74966	7.63381
0	28	4.57123	3.64227	7.41764	4.6974	3.75607
0	28	5.35325	4.01868	7.13289	4.50239	3.39379
0	28	5.08742	4.36767	7.87414	4.63022	6.04602
0	28	5.4978	4.51526	8.05427	6.49235	5.61281
0	28	4.53455	4.82526	7.86847	7.25522	8.06154
1	15	5.637	5.47601	6.60691	4.96059	7.39311
1	8	4.95239	4.92075	6.67522	5.2365	8.00473
0	28	6.03258	4.23685	8.19918	6.14275	6.15244
1	0	4.92047	4.19236	7.07703	5.14029	5.50287
0	28	4.175	3.92083	6.72029	5.70435	4.89857
0	28	4.51777	3.75878	6.85352	5.39979	6.14105
0	28	4.22146	3.98011	7.92302	5.20276	5.96069
0	28	4.62407	4.4015	7.54876	5.47836	4.91289
1	0	4.82168	4.32992	8.27736	4.8783	4.13321
0	28	6.06399	4.62888	8.03255	6.63797	3.7172
1	2	4.71902	4.85422	7.72619	6.53819	10.3698
1	13	5.73158	4.25428	7.10584	6.62969	11.2999
0	28	5.12047	5.57671	7.71403	7.14726	9.49317
0	28	4.50479	3.39353	7.70853	5.33185	11.6066
0	28	4.67071	4.47961	7.28251	4.80451	6.00701
0	28	4.96683	4.48221	7.46014	6.58278	5.33867
1	5	5.11669	4.18242	7.42227	4.06578	3.57524
1	14	5.86529	4.40016	7.6093	7.41684	8.77344
0	28	5.82962	5.439	8.19963	6.36146	4.76182
0	28	5.05168	4.24941	7.4919	6.72854	6.09181
0	28	4.58316	4.37161	7.23113	5.76364	5.59583
0	28	4.4722	4.85563	7.44402	5.52951	5.45091
0	28	5.69838	3.63961	8.25303	6.90742	4.0824
0	28	4.71509	4.95375	7.18828	5.48266	11.5253
1	6	5.38004	5.42097	6.37484	6.25137	6.20862
0	28	5.07166	5.11855	7.7459	8.28171	6.94385
1	3	4.67818	4.63602	7.11041	6.95348	6.00517
0	28	5.03195	4.62412	6.52172	5.39497	9.4424
0	28	4.55674	4.40608	7.73385	6.43661	5.8873
0	28	4.92913	4.93513	7.27946	6.67041	3.86148
1	2	5.11712	4.66834	7.40194	6.55059	7.06307
0	28	4.70836	4.67917	7.10644	5.44834	7.12291
0	28	4.53925	4.87838	8.15531	4.96852	6.10917
1	2	4.93548	5.10954	7.82764	4.85586	6.89441
0	28	5.44637	4.79927	8.40466	6.15454	5.82314
0	28	4.8049	4.46864	8.06868	5.54288	5.63886
0	28	4.7073	3.99029	7.53262	7.57076	4.90091
1	3	5.06897	3.97014	7.52477	4.89562	5.01415
0	28	4.5847	5.09392	6.80902	6.59265	6.26353
1	3	3.76051	3.94742	7.05869	4.62596	5.5808
0	28	5.21826	4.68157	8.42572	7.86636	8.20476
0	28	5.58589	4.96853	7.99038	4.16082	6.48074
0	28	4.63411	4.10326	7.70823	5.61422	8.46981
0	28	4.91672	5.82012	7.54642	7.03942	7.59602
0	28	5.07875	5.09421	7.58089	7.47663	5.02831
1	12	5.24093	5.34466	7.71633	3.90601	6.02175
0	28	5.10629	4.20655	7.85642	4.33166	7.75974
0	28	4.94111	4.88816	7.92883	8.41117	5.75399
0	28	4.67301	4.07608	7.72711	6.10368	7.20099
1	1	5.15342	3.99823	6.62586	3.48218	7.21759
0	28	5.54128	4.89812	7.81814	5.89597	10.3515
1	1	5.60296	4.09707	6.59989	5.77571	8.38485
0	28	5.64909	4.72733	6.76346	4.38087	7.48236
0	28	6.48061	5.79916	6.92928	4.37028	6.52808
0	28	5.45605	4.80652	7.90719	4.15171	6.57324
0	28	5.29161	4.97232	7.94259	5.16161	6.28614
1	1	5.20905	4.93037	7.58999	6.87948	8.329
0	28	4.75013	4.33995	5.94667	5.3583	5.81256
0	28	4.11907	4.33794	6.76562	6.51814	5.36484
0	28	5.06704	4.33967	7.57476	4.86847	3.77878
0	28	4.2785	4.11943	7.32262	5.62683	4.16575
0	28	5.01981	4.42312	8.04328	6.19951	8.97311
1	6	5.84323	5.16035	7.35346	6.38968	4.91088
0	28	5.67654	4.70448	7.22692	6.6199	8.4691
0	28	4.21947	4.13558	7.26503	4.30983	4.10958
0	28	5.36499	4.43185	7.5532	5.51575	5.20376
1	1	4.3672	4.21916	7.84344	5.83244	7.93969
0	28	5.74708	4.47378	7.88108	6.08454	5.59736
0	28	5.13779	4.85711	7.81772	7.87947	6.86219
0	28	4.43413	3.64825	7.39265	6.76487	6.05011
1	1	5.82655	4.58022	8.22631	7.14111	9.45617
0	28	4.85826	4.90797	7.76229	5.05838	5.14388
0	28	4.45561	4.52242	6.79639	8.63645	8.04317
0	28	5.2525	3.21683	7.66298	5.6666	4.08327
0	28	5.31698	5.21698	8.0177	5.61953	5.17144
0	28	4.24389	4.1297	6.51859	5.84334	3.13255
1	5	4.80061	5.69444	7.45456	7.34053	7.40778
0	28	4.8435	5.28817	7.19454	5.94681	5.32443
0	28	4.9195	4.62034	7.91246	5.43098	4.82283
0	28	5.96881	3.60659	7.33055	6.17584	4.43643
0	28	3.89823	4.18238	7.37786	5.69214	5.505
1	5	4.28119	3.49503	7.2316	6.16139	4.70638
0	28	4.08505	4.78631	7.73286	6.32915	9.98521
0	28	5.26955	5.2929	7.33238	5.04196	8.4966
1	0	6.10663	6.13635	7.6197	5.72034	8.26008
0	28	6.02	5.57232	8.24295	3.72653	7.20672
0	28	5.0233	4.36717	8.00849	6.93764	5.20509
0	28	5.56793	5.08887	8.06193	5.23528	8.78869
1	3	5.47065	4.76861	7.67048	6.04017	5.13007
1	12	5.45289	4.62625	8.29917	4.17362	4.09764
0	28	5.48684	5.05285	6.72161	6.17583	5.51346
0	28	4.91846	4.20282	7.449	5.74048	8.28032
0	28	5.63527	4.83155	7.90436	4.39813	6.1451
0	28	5.05185	5.44428	7.91571	5.39635	5.78401
1	6	5.56582	5.08038	7.58582	5.73551	6.08952
0	28	5.50041	4.75569	7.66374	6.95405	7.53344
0	28	4.17238	4.50354	7.56144	7.16593	3.31111
1	14	5.56405	4.90041	7.31917	6.58647	10.4201
0	28	4.86163	4.18259	7.88498	6.86552	6.59607
0	28	4.36127	4.55346	7.22123	6.59487	5.27745
0	28	4.67563	3.84287	6.84742	4.6674	3.72912
0	28	5.25648	5.86615	7.58496	7.21049	6.41851
0	28	5.04136	3.70721	7.68807	4.42352	7.48552
0	28	5.04612	4.16826	7.27848	6.00441	7.59453
0	28	4.5795	3.76614	6.89939	3.9925	10.9145
0	28	5.00745	4.16896	7.47178	7.09809	5.38825
0	28	4.36889	3.87174	5.71005	6.39709	8.97159
0	28	5.1654	4.66152	6.93436	5.53586	5.51017
0	28	5.76103	4.96973	7.8421	6.92637	4.39468
0	28	4.67131	4.02846	7.00854	5.67104	4.25043
0	28	4.27659	3.06378	7.22999	7.21027	8.22789
0	28	4.53731	4.39943	6.65771	6.40774	7.71922
1	4	5.03358	5.26466	7.31797	5.70015	4.339
0	28	5.57562	4.52261	7.53217	6.3098	10.0348
1	3	5.4309	4.42568	7.73616	4.22292	10.4173
1	10	4.97659	4.14809	6.25914	6.49208	10.3769
1	28	5.24873	4.32594	6.80949	4.98285	3.87081
1	15	5.81362	5.23271	6.50477	4.14893	6.5735
0	28	4.90817	4.3256	6.86892	5.97323	4.51825
0	28	4.89224	4.6416	6.58182	5.47236	6.42946
0	28	4.93264	4.21455	7.60833	6.3384	11.2566
0	28	5.34257	4.54724	7.10955	6.21374	9.25944
1	2	5.14731	5.25722	7.20906	5.1317	11.395
0	28	4.29653	3.65257	6.96859	6.66068	5.06021
1	18	6.3091	5.25478	6.58478	5.86	7.28238
0	28	5.03836	4.41254	7.26202	4.68967	7.06096
0	28	5.53112	4.75521	7.64951	7.04773	4.79181
0	28	5.28441	4.4147	7.65676	6.48347	4.69507
0	28	5.1167	4.68127	7.40953	6.90577	3.95499
1	12	5.07959	4.74526	6.95434	5.84309	4.28017
1	7	4.67906	5.34567	8.01489	7.21148	8.3452
0	28	5.57493	4.38388	8.09292	6.74274	5.35272
0	28	3.95844	3.63159	6.52137	5.26719	3.79991
1	4	4.89554	4.46664	7.77645	6.45795	6.69738
0	28	5.32954	5.26726	8.11454	7.55939	5.74294
1	3	5.70502	4.49689	7.78692	5.76367	5.96487
1	1	5.30557	4.64271	7.12859	6.95322	9.65349
1	2	4.6855	3.70083	6.09841	6.64769	3.67166
0	28	4.75295	3.90657	7.2737	5.95453	4.21308
0	28	4.73686	4.962	7.24979	6.81781	4.81726
1	3	4.81085	5.14757	7.61698	6.74369	4.62833
0	28	5.78301	3.86691	7.80471	3.63649	5.9078
0	28	5.4753	4.41658	7.76624	5.97065	6.43029
0	28	5.17014	4.66127	7.03618	5.4126	4.45048
0	28	4.30462	4.3207	7.87006	7.05685	8.55237
0	28	4.5403	4.31746	6.41878	5.67323	9.69037
0	28	4.35451	4.83945	7.02787	6.90941	5.54673
0	28	5.16126	4.91082	7.67921	6.45288	10.6548
0	28	6.08339	5.36	8.19032	7.77618	5.90863
0	28	4.71137	3.86374	8.26253	6.27822	5.64943
0	28	6.20002	4.57009	7.94718	6.65539	8.945
0	28	5.26202	5.38067	7.91747	7.43965	5.39323
1	23	5.61244	5.27052	7.31678	6.33399	6.60851
0	28	5.09628	3.6603	7.06477	6.24979	3.63646
0	28	4.99936	4.62832	7.26186	5.48458	5.31534
1	6	5.08316	4.71972	8.31512	8.03421	5.23606
1	12	4.83376	5.35951	7.57589	6.01442	7.89843
0	28	4.57687	4.21124	7.72784	6.76205	4.31455
0	28	5.59936	5.07658	7.06804	7.39509	9.34626
1	7	4.90633	4.53578	7.72552	5.74482	7.95162
0	28	5.13799	5.23216	7.89858	5.65596	4.46278
0	28	4.42229	4.04653	6.94121	6.0516	3.27664
0	28	4.97969	3.98443	7.65746	6.92815	5.07083
0	28	3.72589	3.78058	7.582	5.60749	5.8983
1	14	4.86314	4.5361	7.78247	6.68209	6.83635
1	27	5.51259	4.77847	6.65825	5.63872	7.20267
0	28	5.0485	4.09452	7.69393	7.2719	7.3557
0	28	5.51067	4.92021	7.24471	6.26893	3.63509
0	28	5.11888	4.0534	7.47385	6.15153	5.45461
0	28	5.32935	4.91393	7.67425	6.00092	10.2595
0	28	4.96753	4.04118	5.30985	4.68214	5.80309
0	28	4.95032	4.28201	7.01324	6.31725	3.63914
0	28	5.86065	5.42298	7.55602	6.45388	5.75761
0	28	5.44146	4.58801	8.29902	6.23943	5.82176
1	16	6.02959	5.63822	6.20871	5.4304	8.03385
0	28	5.43184	4.49926	7.50445	5.9182	7.38662
0	28	4.04721	4.1075	7.03428	5.87052	3.69114
1	7	5.62854	4.6209	7.67266	5.8954	6.66297
0	28	4.55429	4.37021	7.57834	7.33573	6.24779
0	28	4.77357	3.90151	7.01093	6.8066	3.64816
1	3	5.71639	4.22146	7.02361	5.95665	4.3403
0	28	5.02625	4.75224	7.77968	6.06173	5.58829
0	28	4.99896	4.72956	8.3177	4.91313	4.90726
0	28	4.83793	4.00579	7.84121	6.55468	4.91146
0	28	4.31732	5.08419	7.66997	7.67379	5.84698
0	28	5.32981	5.25943	7.13222	4.26458	5.88378
0	28	4.45087	3.97316	7.61822	6.59085	6.89917
1	10	4.94485	4.3097	6.75975	5.21971	8.79118
0	28	5.35395	4.41682	7.64631	5.95347	5.57095
1	0	4.72022	4.35462	7.48057	5.70627	5.27041
0	28	4.56517	5.00806	7.1958	5.61435	7.61535
1	10	6.3932	5.44522	6.3366	5.14226	7.79593
0	28	5.13941	3.85238	7.10501	4.40674	3.53983
0	28	4.26238	4.32031	7.70524	5.5927	6.32845
0	28	4.49919	4.50962	7.03253	4.59665	7.92277
0	28	5.67454	4.05481	7.3182	5.61817	3.9881
1	2	5.55717	4.95923	6.2637	4.43101	8.38367
0	28	4.2718	4.21024	7.55642	5.01266	4.40922
0	28	5.44071	4.70599	6.81492	6.8567	4.03818
0	28	4.10521	4.01872	6.60597	6.71565	4.57078
0	28	3.92951	4.09308	7.62103	5.55479	11.4251
1	0	4.64184	4.29418	7.33129	6.14879	11.144
0	28	4.80709	4.09532	7.21071	7.36615	4.42152
0	28	4.71566	3.79574	8.20173	5.23163	5.04137
0	28	5.78149	4.70293	7.934	6.97064	5.33322
1	21	5.80849	4.90246	6.06289	5.00452	6.60755
0	28	4.91627	4.2822	7.20469	6.17875	3.85357
0	28	5.31571	4.45563	7.73075	5.35972	5.14124
0	28	4.46407	3.94122	7.13642	4.85916	6.19452
0	28	3.85904	4.13697	6.85432	6.83286	11.6939
0	28	4.35124	4.16138	5.53684	5.07702	9.25453
0	28	4.64869	3.06273	7.44252	4.19811	8.42632
0	28	4.12478	4.54393	6.82178	6.7561	10.0986
0	28	5.1242	4.88274	7.58127	4.83531	7.44834
1	11	4.82811	4.37684	7.96698	5.53615	5.46928
1	0	5.28522	4.41752	7.52089	4.61441	3.43807
0	28	5.20527	3.77593	7.82548	4.40308	3.04691
1	1	5.33621	4.10933	6.93463	5.57314	4.05469
0	28	5.94628	4.36508	7.93451	5.73961	4.14118
1	1	6.00096	5.02126	5.98434	4.98262	8.08356
0	28	4.86483	3.96831	7.54788	3.59219	4.80283
0	28	5.47902	4.64246	8.18099	5.60556	6.4401
1	25	5.23506	4.51798	8.08273	3.93625	5.15373
0	28	5.61861	4.30106	7.44356	7.12523	5.1874
1	5	4.90624	4.67955	7.63014	4.84633	8.18266
0	28	5.0779	4.70644	8.22861	3.95192	7.35635
1	2	5.86079	5.31833	7.08102	5.48071	7.65406
0	28	5.07023	5.10134	6.52683	6.56874	6.4171
0	28	4.99341	5.30127	7.55298	7.51683	6.96805
1	1	5.13446	5.21224	7.6269	7.21512	6.31472
0	28	6.03119	4.58742	7.94066	5.25229	8.067
0	28	5.27412	4.95038	7.93553	4.47887	5.9737
1	2	5.02173	4.82982	7.56918	4.36883	7.41438
1	8	5.07795	4.48488	7.16448	4.27077	5.90138
0	28	5.1783	4.72332	7.67736	4.73747	4.68969
0	28	4.31203	4.44751	7.67447	5.72412	4.28319
1	0	4.33296	3.90316	6.30027	5.50657	8.9931
1	8	5.64439	4.26826	6.91847	5.0478	6.53068
0	28	4.70948	4.72441	7.66052	7.08204	6.74185
0	28	4.81122	4.46336	8.02242	6.12669	7.19845
0	28	3.87175	3.47393	6.70592	3.63928	5.77186
0	28	5.63735	5.08854	7.13279	5.93587	7.3568
0	28	5.1769	4.02178	8.36728	5.44954	5.70655
0	28	4.30666	3.97427	6.9208	5.99939	8.88244
0	28	4.90648	4.71678	7.89046	5.38723	5.46079
0	28	5.25186	5.11017	8.02617	7.52392	5.22882
1	15	6.13661	5.13844	6.37071	5.26018	9.29319
0	28	4.63262	5.20954	7.3312	6.62354	5.21101
0	28	5.74379	5.56021	8.06817	5.15769	7.85182
0	28	5.25771	4.19827	7.84267	4.44376	3.85629
1	11	6.14539	4.83886	6.25375	5.12802	8.69217
1	2	6.31505	5.30295	6.33468	4.96186	9.25702
0	5	5.45586	4.40605	7.17373	7.46722	6.28838
0	28	5.31814	4.30704	7.69346	4.51956	4.95523
0	28	4.06604	3.26674	7.15221	4.00748	11.0135
0	28	4.5869	3.97577	7.36685	6.08592	5.02404
1	1	4.63346	4.47394	8.02586	5.4815	5.37052
1	18	5.31118	3.83514	7.29087	6.33692	6.03984
1	19	4.2142	4.516	5.81252	6.20629	9.6841
0	28	5.27702	5.05896	7.44192	6.17204	6.28075
0	28	6.03679	5.33817	7.57679	6.27348	6.19953
0	28	4.74053	4.69894	7.45114	6.55394	4.87084
1	1	4.73517	4.80957	7.45267	4.4024	11.199
0	28	4.77115	4.26415	7.42337	7.2164	5.10648
0	28	5.03832	4.63407	7.4444	7.02633	5.09127
0	28	4.96083	4.3238	7.18912	5.41519	6.97647
0	28	4.99481	4.52501	6.10079	4.93181	7.03833
0	28	4.6396	4.34004	6.75905	6.22847	4.73911
0	28	5.55213	4.62596	7.40618	7.51317	5.40358
0	28	4.83576	4.34847	7.88786	6.81543	5.71175
0	28	4.29444	3.8848	7.56186	5.64521	5.77507
0	28	5.06015	5.50958	7.91618	5.17487	6.6295
0	28	5.4449	4.07752	7.59172	6.56862	4.04322
0	28	5.12105	4.28855	6.97616	6.35852	7.51701
0	28	4.13835	4.01255	7.00446	6.8916	3.19802
0	28	5.68404	5.32968	7.85458	8.09522	4.68635
0	28	5.07493	5.49999	6.88343	5.69968	3.86605
0	28	5.4574	4.87435	8.10031	6.39838	6.94138
0	28	5.25611	4.28915	7.86281	5.30196	3.98885
0	28	5.08399	4.70919	7.44157	6.77211	5.16985
0	28	3.74391	4.33393	6.49407	3.69593	6.65237
0	28	4.80918	3.82441	7.81564	4.92213	7.62314
0	28	4.68384	3.99406	6.78272	6.77261	5.08288
0	28	5.37659	4.41031	8.60897	7.07919	5.28592
0	28	4.93662	4.81063	6.66113	6.00721	8.65619
0	28	4.69996	4.38475	7.12582	5.77422	4.45131
0	28	4.43126	3.7245	7.1401	5.26438	3.83446
0	28	5.26951	3.76763	7.15729	6.69063	5.02247
0	28	5.24749	3.7847	7.31885	5.38	3.60862
0	28	6.14172	4.83197	7.6922	6.59224	4.45473
0	28	4.57831	4.72971	7.10712	7.34654	8.5788
0	28	5.82559	4.52901	8.00411	6.80793	6.10839
0	28	4.73085	4.57879	7.89272	5.6891	3.74425
0	28	6.10733	4.38654	7.41949	5.24795	10.5968
0	28	5.51848	4.61797	7.30963	5.57843	9.11595
1	8	4.42263	3.49495	7.09699	6.66794	3.59179
0	28	5.88836	4.01042	7.38786	6.8227	3.81095
0	28	4.98372	3.80824	7.55896	4.90221	5.11437
0	28	4.98797	4.63315	6.72487	4.95303	5.8814
0	28	5.68615	5.23042	7.58229	5.54479	6.2348
0	28	4.20534	3.89951	6.40621	5.90977	3.7222
1	17	6.28031	4.93329	6.52276	4.81251	8.04605
0	28	4.32219	4.69683	7.28731	5.16623	5.81458
0	28	3.8405	3.98479	7.45742	6.16687	3.95002
1	20	6.0083	5.44207	6.61788	5.6388	6.21231
0	28	4.72715	4.27402	8.13198	4.4933	7.10507
0	28	4.41652	3.29225	7.48129	4.96794	10.9992
0	28	5.3441	5.19751	8.04993	6.28746	6.07167
1	1	3.98999	3.80269	7.44476	5.58708	6.5013
1	13	6.28564	4.98185	6.47827	5.01305	8.51174
0	28	4.46712	4.43468	6.09043	5.18691	10.1123
0	28	4.98374	4.41311	7.48013	6.60739	8.48401
0	28	4.97882	4.43851	7.79707	5.66049	7.53975
0	28	4.73506	4.30355	6.97808	6.48615	8.28923
0	28	5.56708	4.20751	7.47724	6.15578	4.94951
0	28	5.05223	4.62797	7.61042	6.057	6.05465
0	28	4.98529	4.83216	7.42011	6.27472	9.09849
0	28	5.52834	4.60695	8.26254	7.99837	5.86294
0	28	4.29631	3.94486	7.84686	6.47027	9.00022
0	28	4.18527	3.56998	6.94714	6.13723	7.79491
0	28	5.14374	4.5231	7.32903	5.71624	6.36316

## Sheet: qPCR
	ID	CFD	CD59	SEPRINB2	P2RX1
control	N13-control	2.0168	3.53642	3.92530183166876	3.04474
control	N23-control	1.034	4.19438	2.4137	1.28555
control	N24-control	1.19916	1.2692	0.4643	1.33989
control	N18-control	0.399892	0.0531175	0.227324	0.190674
sepsis	1-sepsis	NA	9.48662	1.24367	2.11258
sepsis	6-sepsis	1.20346	1.37829	2.79187	0.57071
sepsis	31-sepsis	0.188883	1.64335	1.27276	3.15182
sepsis	3-sepsis	0.132161	2.1039	0.793433	1.56605
sepsis	9-sepsis	0.252926	3.39446	0.835375	6.1257
sepsis	28-sepsis	0.0532368	2.21053	1.47161	5.30407
sepsis	32-sepsis	0.021586	1.59804	0.908765	5.18206
sepsis	13-sepsis	0.0689394	0.525087	0.773258	4.21898
sepsis	5'-sepsis	0.085447	0.402445	2.64134	3.05306
sepsis	24-sepsis	0.415454	0.594707	1.09462	7.21902
sepsis	8-sepsis	0.513399	9.42542	1.06073	26.2891
sepsis	4-sepsis	26.9481	21.6197	NA	42.4736
control	N16-control	0.873072	1.08561	0.313778	0.526657
control	N18-control	6.54223	2.70557	6.39613	5.96617
control	N20-control	0.175075	0.340461	0.498264	0.318256
sepsis	42-sepsis	2.96469	15.262	14.3437	12.122
sepsis	45-sepsis	0.11188	0.485551	0.538181	0.363276
sepsis	36-sepsis	0.228682	0.620448	0.125951	0.149546
sepsis	37-sepsis	0.19488	1.22592	0.791488	1.13445
sepsis	44-sepsis	1.12993	0.480157	0.65507	0.870651
sepsis	7-sepsis	0.80467	0.132777	0.282188	0.367357
sepsis	41-sepsis	0.376427	0.195756	0.301467	0.42473
sepsis	43-sepsis	224.924	121.756	51.6852	64.9823
control	N17-control	1.04737	0.888288	0.600757	1.13489
control	N19-control	0.471102	0.393137	0.239154	0.767512
control	N21-control	2.02669	2.86353	6.96021	1.14805
sepsis	S2-sepsis	3.09695	3.07461	4.78932	13.7134
sepsis	S14-sepsis	0.626691	1.26442	2.55476	2.01603
sepsis	S21-sepsis	3.16726	2.06759	0.745022	2.30514
sepsis	S26-sepsis	2.03421	3.0958	1.13885	11.383
sepsis	S29-sepsis	0.404686	1.36111	0.586134	1.71733
sepsis	S30-sepsis	2.50725	4.91249	3.52016	11.4022
sepsis	S34-sepsis	3.08748	11.1423	1.2742	7.95776
sepsis	S47-sepsis	1.42434	3.53587	0.479829	2.02207
sepsis	N13-control	1.48585	1.32936	2.39564	1.75246
sepsis	N23-control	0.761786	1.57669	1.4731	0.739921
sepsis	N24-control	0.883468	0.477101	0.283366	0.7712
sepsis	S10-sepsis	0.480407	2.19805	1.75966	4.92397
sepsis	S38-sepsis	0.292115	0.336958	0.726667	1.14584
sepsis	S39-sepsis	0.153208	0.94633	0.411544	1.01065
sepsis	S40-sepsis	0.0996423	0.239156	0.435481	1.34129
sepsis	S46-sepsis	0.0618616	0.416168	0.317005	0.866635
sepsis	S49-sepsis	1.04668	3.51361	12.1357	6.80548
sepsis	S50-sepsis	0.00700297	1.08219	0.258516	1.16701
sepsis	S51-sepsis	0.757493	12.3795	3.47914	8.03272
control	N12-control	0.65652	0.0794678	1.32357	0.201002
control	N26-control	0.516688	0.867995	0.970385	0.960294
control	N27-control	0.241185	1.36713	0.62703	0.428947
control	N28-control	1.68795	3.38896	0.910936	3.81797
control	N29-control	3.00137	1.43499	1.53485	1.78465
control	N30-control	2.41266	2.18055	0.888112	1.77257
sepsis	S53-sepsis	23.939	4.03287	9.77831	6.72279
sepsis	S54-sepsis	5.32741	0.318069	1.62076	0.814277
sepsis	S55-sepsis	5.9394	1.5741	3.12025	2.11782
sepsis	S56-sepsis	1.32306	0.378794	0.750705	0.329508
