# Supplementary material for: Explainable AI-driven heterogeneity using coagulation–inflammatory markers improves prognosis prediction, risk stratification, and anticoagulant treatment effects for sepsis
Source: Research Square preprint supplement (doi:10.21203/rs.3.rs-5835917/v1), 2025-02-27
Supplement: Supplementary file 4 [file c93c311615f842a4afc8c740.docx]

**Supplementary Information for**

**Explainable AI-driven heterogeneity exploration using coagulation–inflammatory markers improve prognosis prediction, risk stratification, and anticoagulant treatment effects for sepsis**

**Table of Contents**

[Supplementary Figure 1. Chord diagrams and radar plots showing abnormal clinical variables of clusters obtained by different unsupervised methods. 1](#_Toc179812122)

[Supplementary Figure 2. Correlation analysis diagram. 3](#_Toc179812123)

[Supplementary Figure 3. Identification of genes as diagnostic biomarkers. 4](#_Toc179812124)

[Supplementary Figure 4. Identification of genes as prognostic biomarkers. 5](#_Toc179812125)

[Supplementary Figure 5. Visualization of the bins for the variable purpose as created by the package scorecard. 7](#_Toc179812126)

[Supplementary Figure 6. Potential benefits of heparin in sepsis management. 8](#_Toc179812127)

[Supplementary Table 1. Prognostic prediction performance of models based on the sepsis predictors. 11](#_Toc179812128)

[Supplementary Table 2. Optimized Binning of continuous features. 12](#_Toc179812129)

[Supplementary Table 3. Baseline characteristics of the MIMIC-III/IV. 14](#_Toc179812130)

[Supplementary Table 4. Baseline characteristics of the eICU-CRD and Local ICU. 16](#_Toc179812131)

[Supplementary Table 5. To assess the optimal number of clusters for subtype analysis using sepsis predictors. 17](#_Toc179812132)

[Supplementary Table 6. Comparison of prognostic prediction performance: pre-trained SepsisFormer compared with other machine learning and deep learning models employing coagulation-inflammatory markers and age obtained from the cohort 1 composed of eICU-CRD and MIMIC-III. 18](#_Toc179812133)

[Supplementary Table 7. Comparison of prognostic prediction performance: fine-tuned and validated SepsisFormer, other machine learning and deep learning models employing coagulation-inflammatory markers and age obtained from external cohort 2 and cohort 3, collected from MIMIC-IV and Local ICU, respectively. 19](#_Toc179812134)

[Supplementary Table 8. Comparison of prognostic prediction performance: SepsisFormer in septic patients using coagulation-inflammatory markers and age obtained from the Local ICU cohort under different domain adaptation methods. 20](#_Toc179812135)

[Supplementary Table 9. Different roles of the diagnostic genes. 21](#_Toc179812136)

[Supplementary Table 10. 28-day survival predicted results and actual results Kappa value. 22](#_Toc179812137)

[Supplementary Table 11. Different roles of the prognostic genes. 23](#_Toc179812138)

[Supplementary Table 12. To assess the optimal number of clusters for subphenotype analysis using coagulation-inflammatory markers and age. 24](#_Toc179812139)

[Supplementary Table 13. Comparison of clinical characteristics between subphenotypes of patients with sepsis. 25](#_Toc179812140)

[Supplementary Table 14. SIRI values of the four study cohorts. 26](#_Toc179812141)

[Supplementary Table 15. Association of heparin with survival rate and days of survival in patients with subphenotypes combined with risk stratification. 27](#_Toc179812142)

[Supplementary Table 16. SepsisFormer parameter setup. 28](#_Toc179812143)

[Supplementary Table 17. Primer sequences for real-time polymerase chain reaction. 29](#_Toc179812144)

[Supplementary Method 1. Detailed algorithm derivation of SepsisFormer. 30](#_Toc179812145)

[Supplementary Method 2. DEGs screening steps and RT-qPCR experimental steps. 34](#_Toc179812146)

[Supplementary Method 3. Detailed algorithm derivation of SMART. 35](#_Toc179812147)

[Supplementary Method 4. Pseudocode of our proposed discretization algorithm based on ChiMerge. 38](#_Toc179812148)

[Supplementary Method 5. Adjust bin. 39](#_Toc179812149)


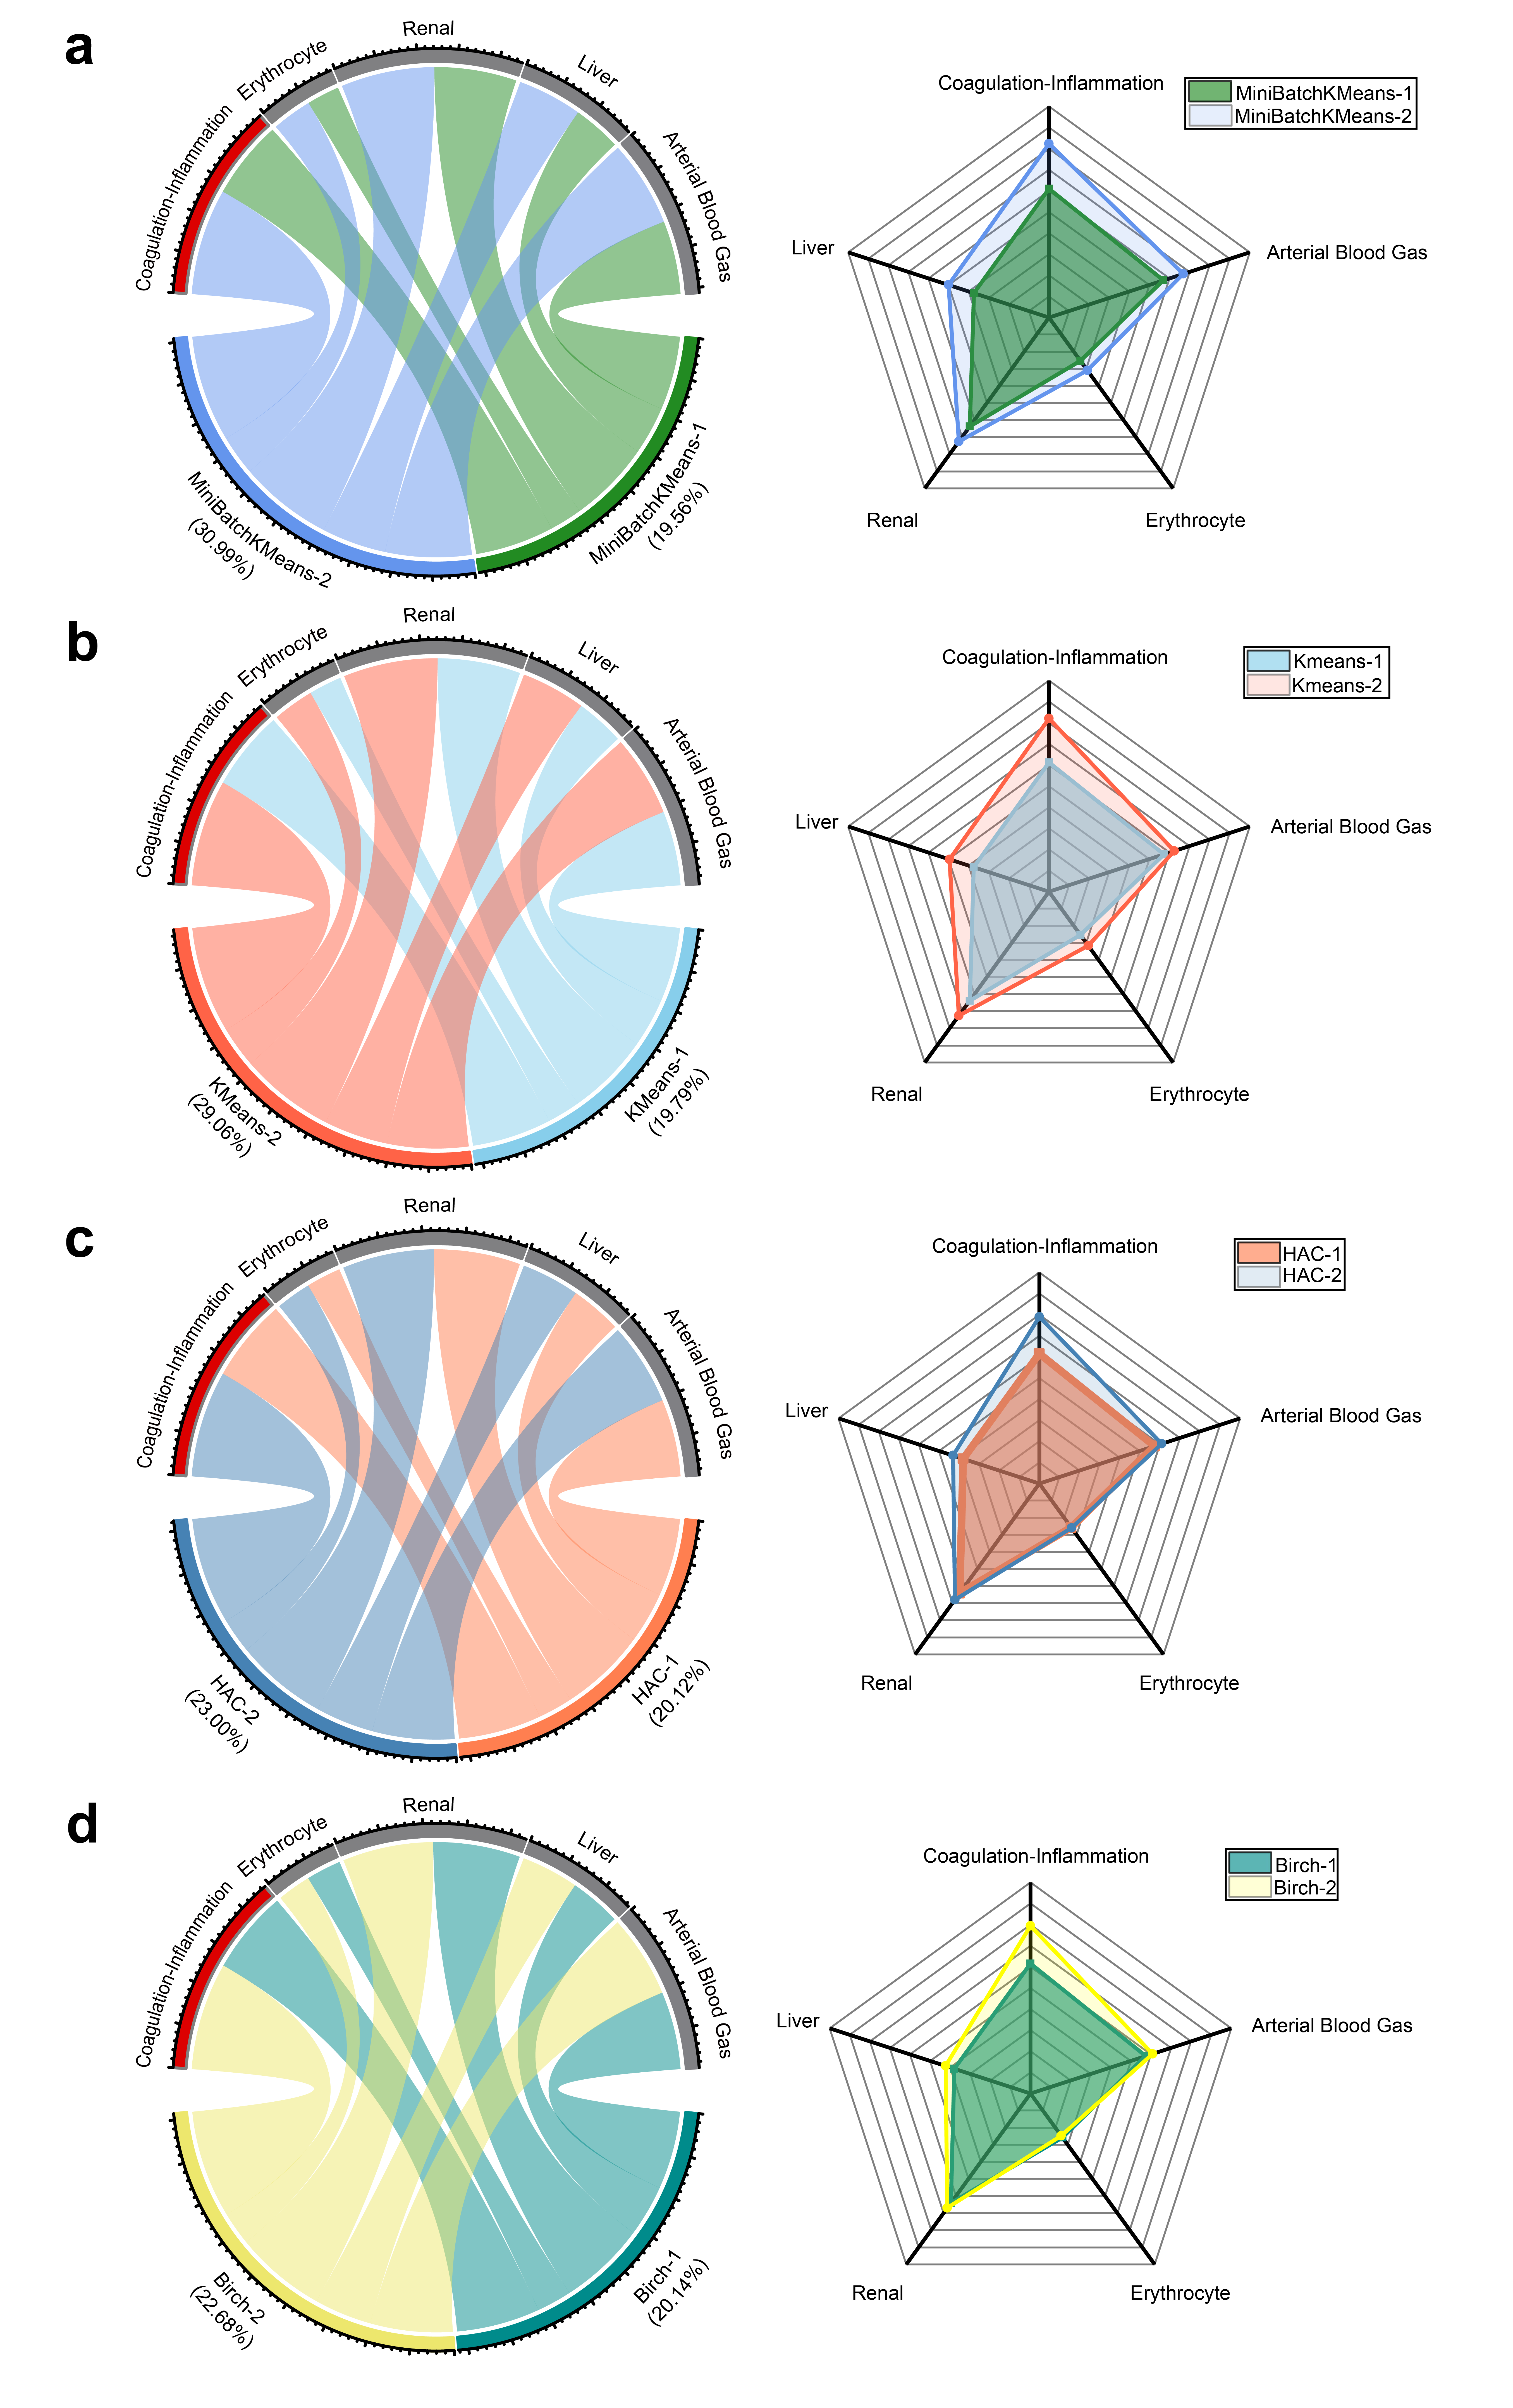


Supplementary Figure 1. Chord diagrams and radar plots showing abnormal clinical variables of clusters obtained by different unsupervised methods. **a,** MiniBatchKMeans. **b**, K-means. **c**, Hierarchical Agglomerative Clustering (HAC). **d**, Balanced Iterative Reducing and Clustering using Hierarchies (Birch).

**
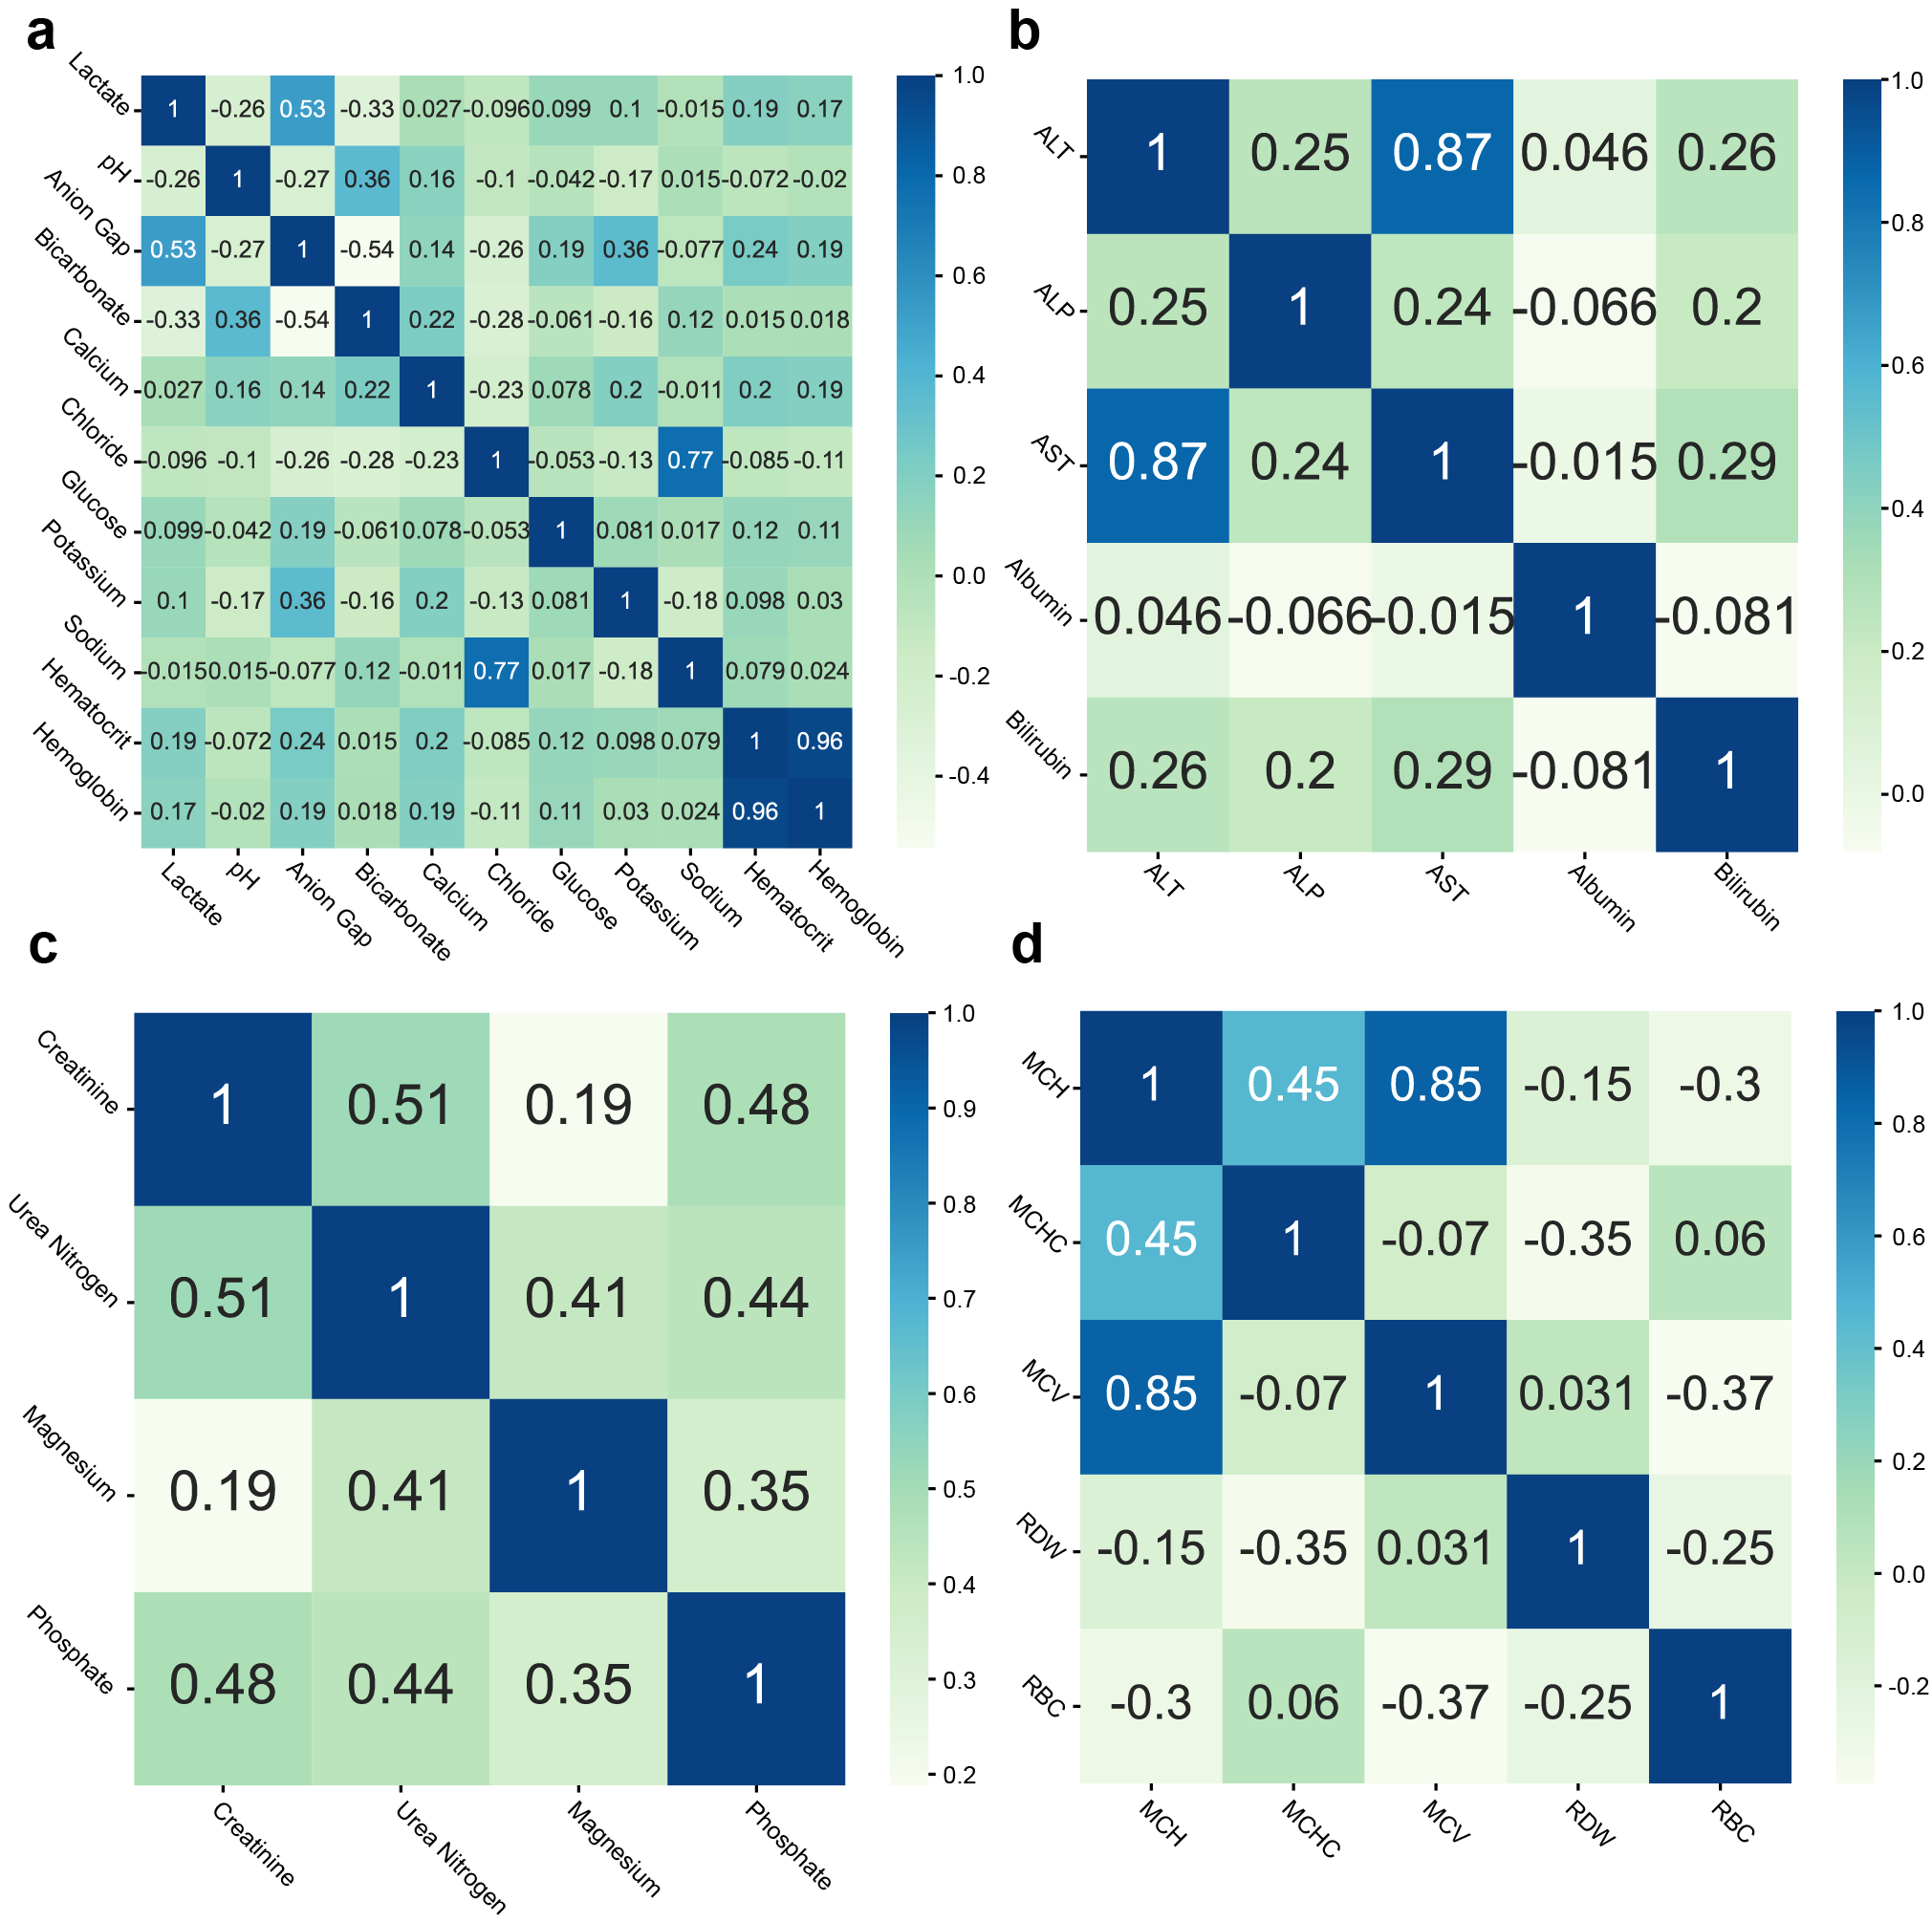
**

Supplementary Figure 2. Correlation analysis diagram. **a**, Correlation analysis of arterial blood gas markers. **b**, Correlation analysis of liver markers. **c**, Correlation analysis of renal markers. **d**, Correlation analysis of erythrocyte markers.

**
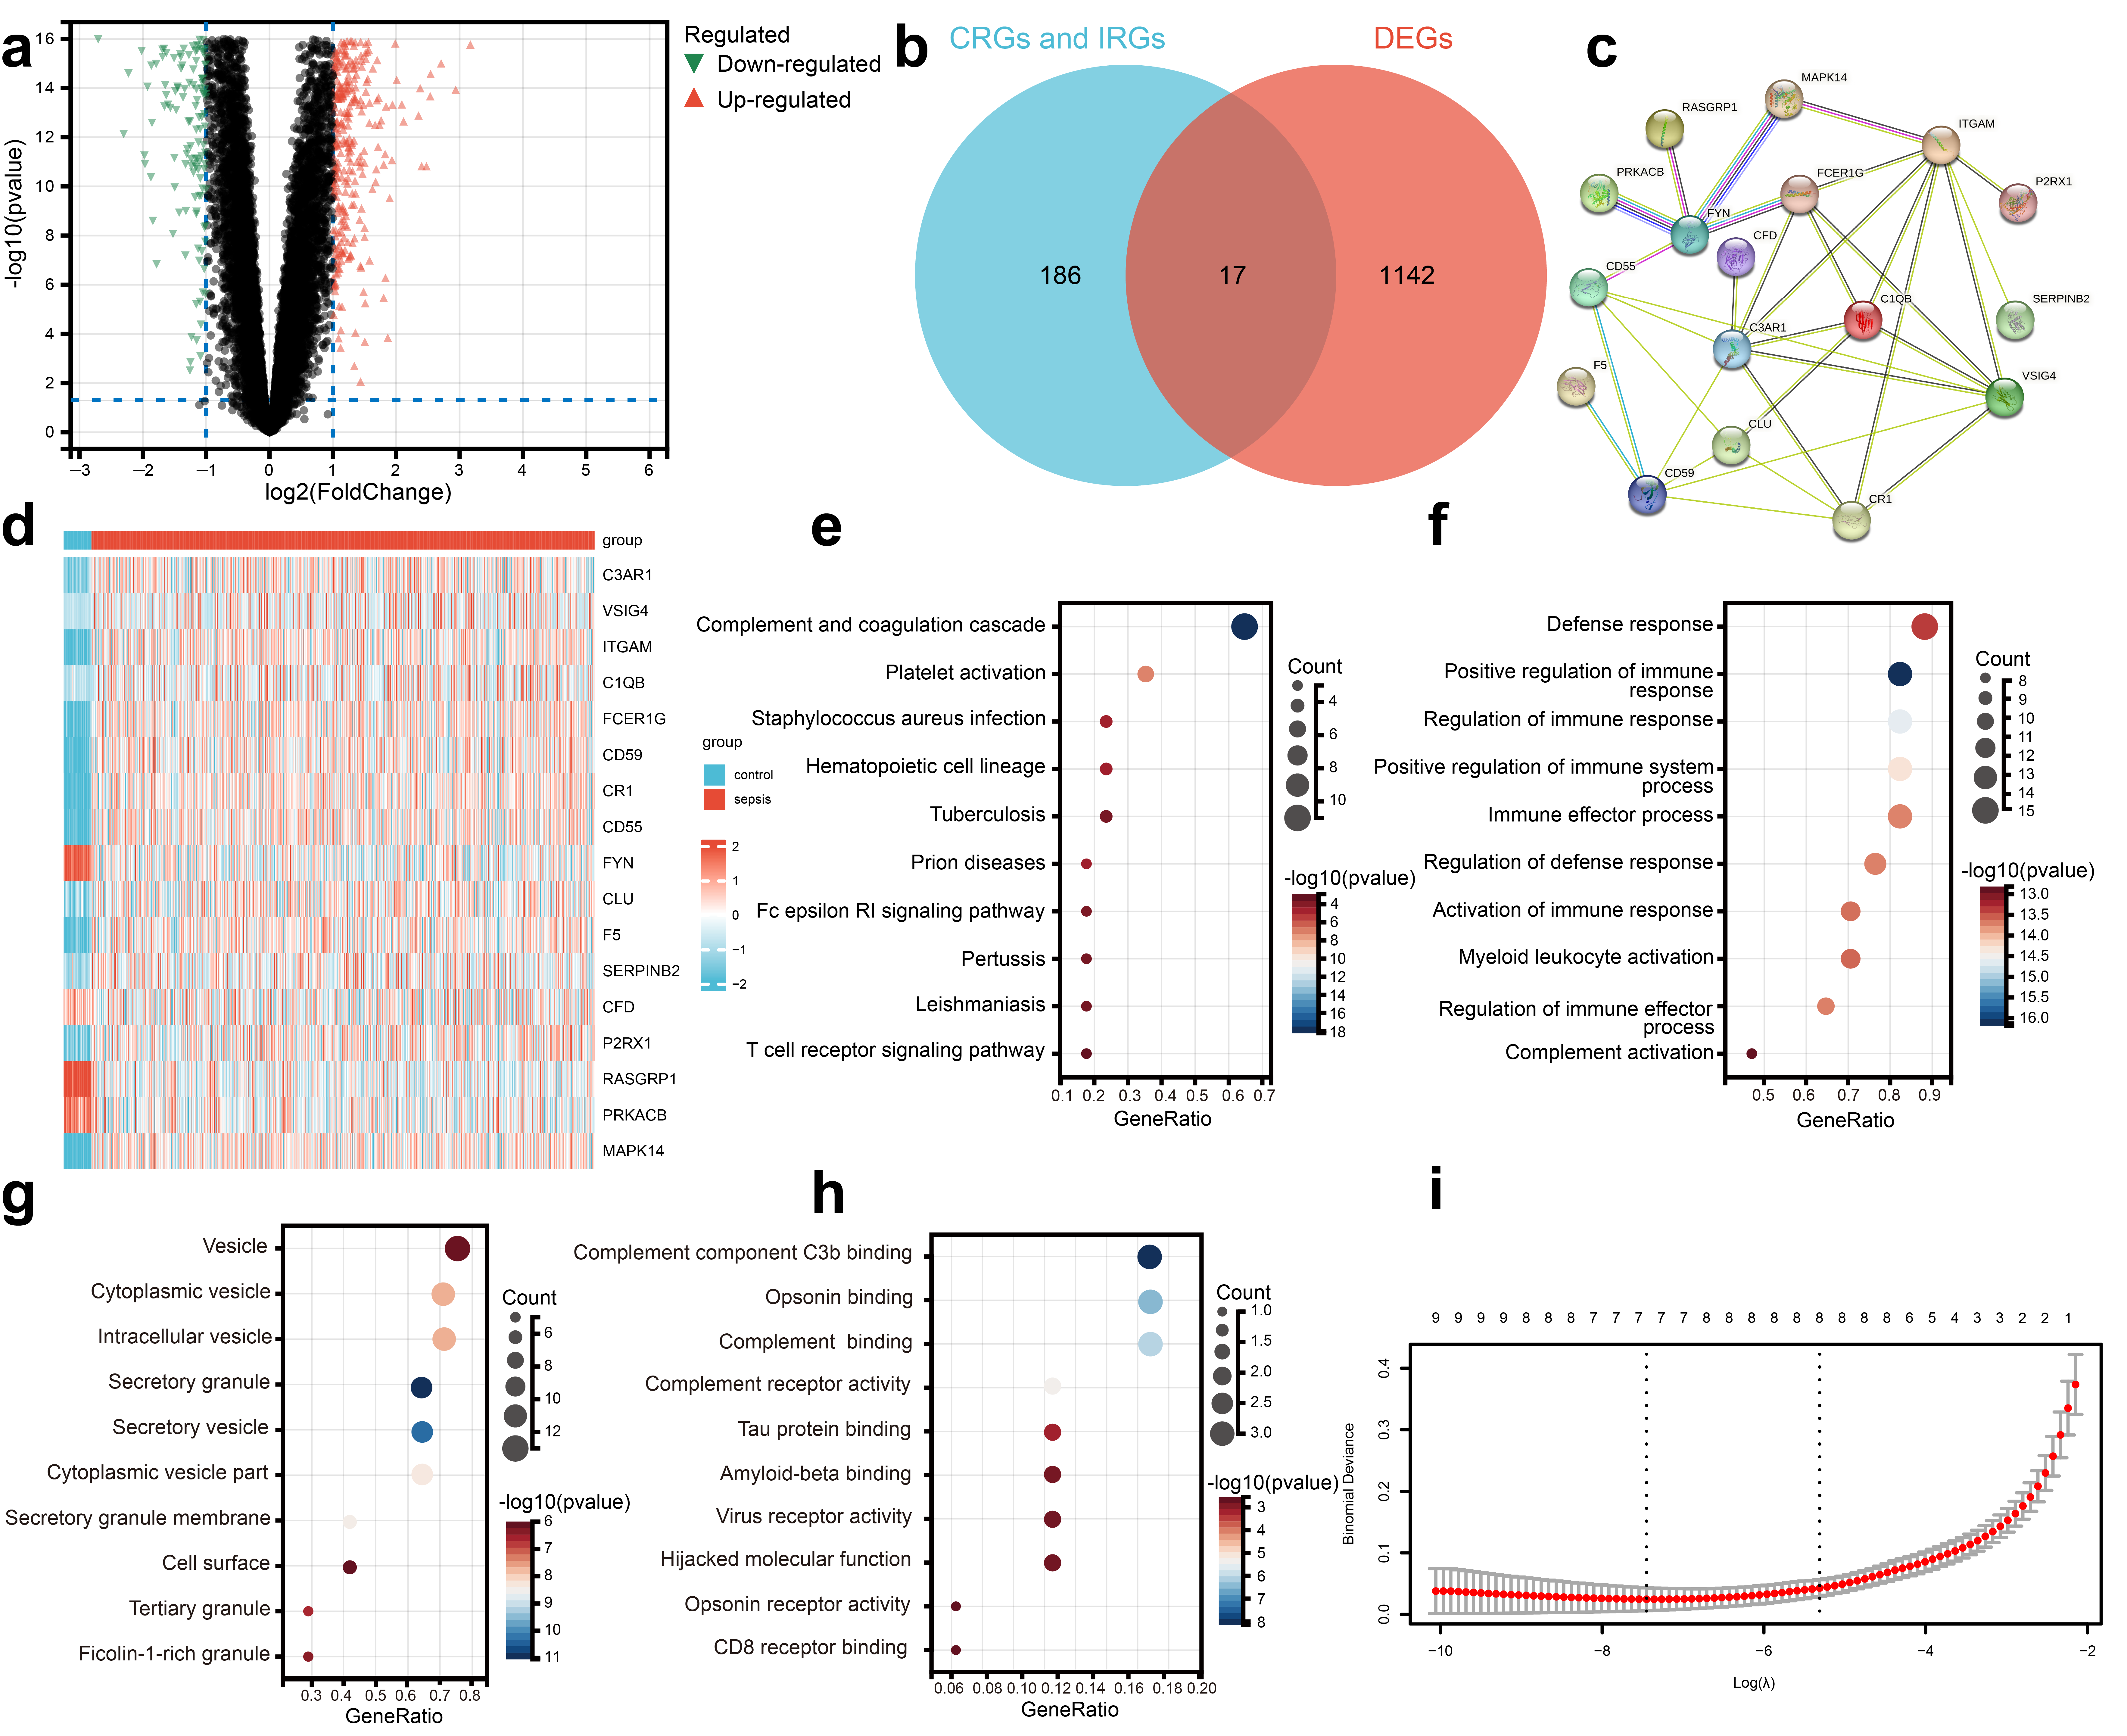
**

Supplementary Figure 3. Identification of genes as diagnostic biomarkers. **a,** Volcano plot generated to display the DEGs between sepsis patients and healthy controls. **b,** Venn diagram presenting the overlapping genes between CRGs, IRGs, and DEGs. **c,** The PPI network of intersection genes, applying a filter condition (combined score > 0.4). **d,** The heat map displaying the 17 DECRGs and DEIRGs. **e-h**, Pathway enrichment analysis shows the results of KEGG (**e**), GO biological pathway (**f**), GO cell (**g**), and GO molecular function (**h**) in 17 DECRGs and DEIRGs. *P*-value < 0.05 and FDR < 0.1 were considered as statistically significant thresholds. **i,** Identification of 7 DECRGs and DEIRGs using Lasso regression.


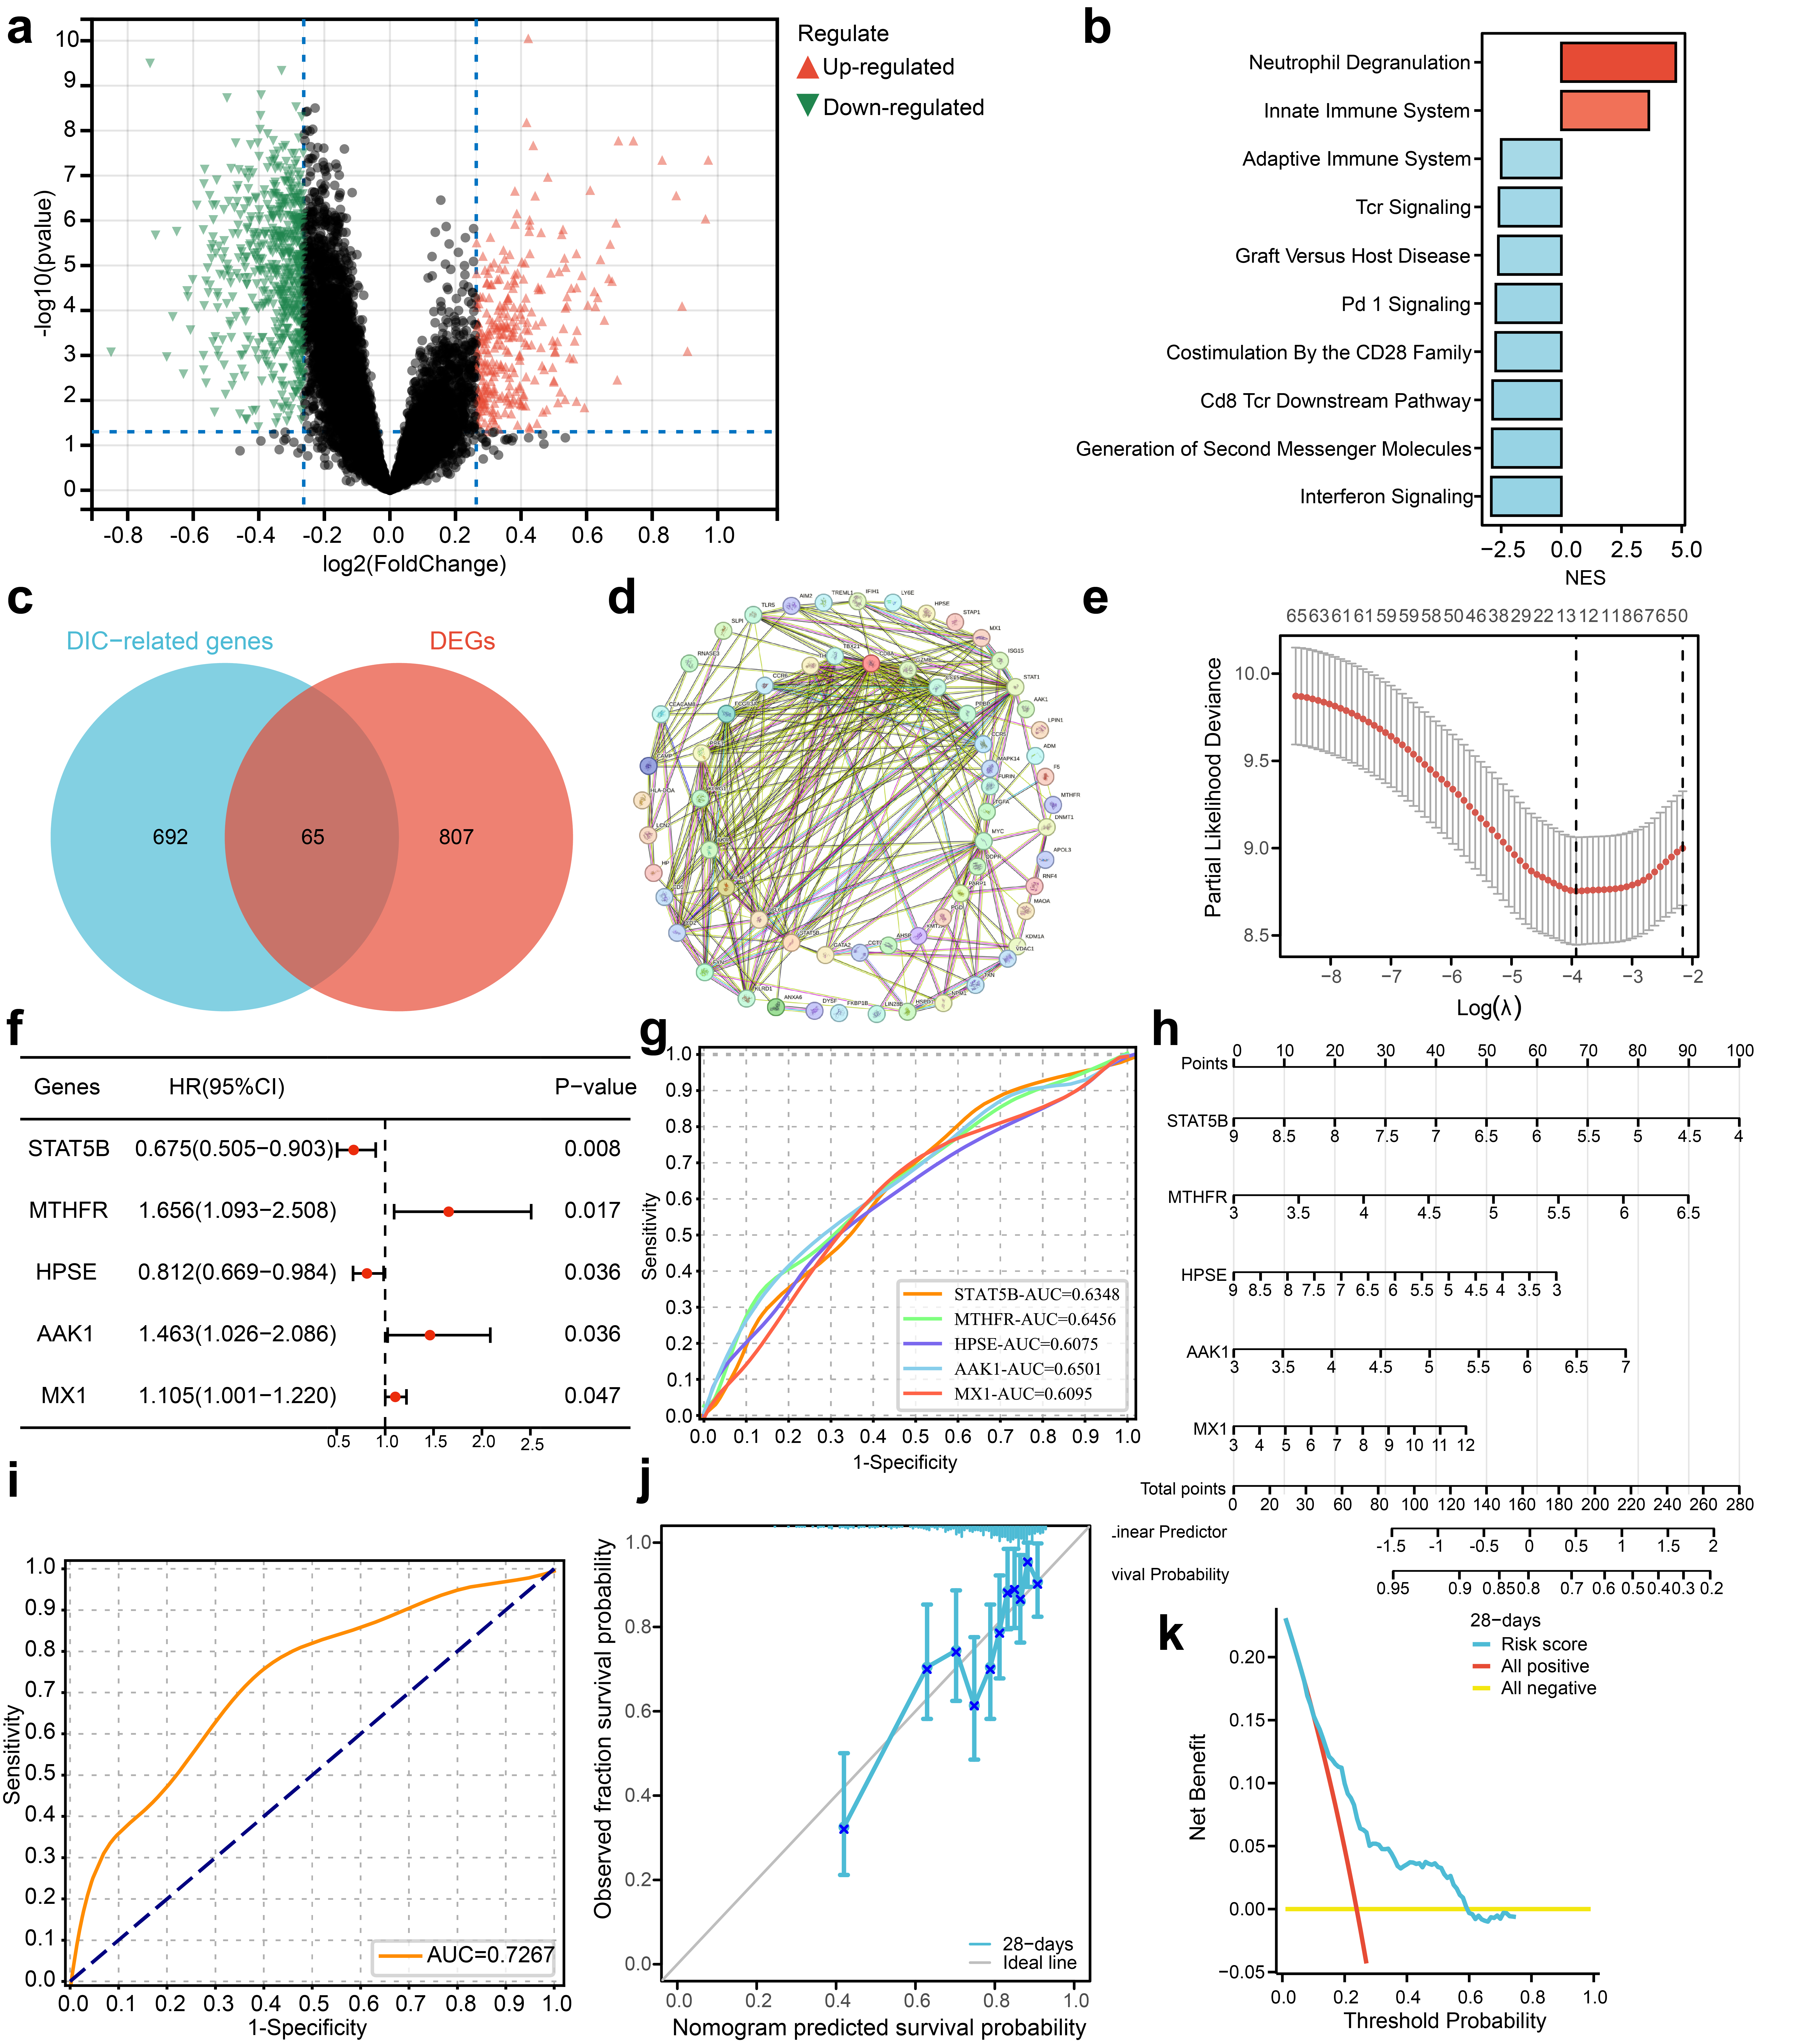


Supplementary Figure 4. Identification of genes as prognostic biomarkers. **a,** Volcano plot showing DEGs between septic survivors and non-survivors. The threshold for DEGs was set at *P* value < 0.05 and fold change > 1.2. **b,** The top ten GSEA enrichment analyses of DEGs and the adjusted *P* value of < 0.05 and FDR of < 0.25 were considered statistically significant. The blue represents down-regulation in sepsis survivors, while red represents up-regulation. **c,** Venn diagram illustrating the overlapping genes between DIC-related genes and DEGs. **d,** The PPI network of intersection genes, applying a filter condition (combined score > 0.4). **e,** Identification of 12 potential DIC-related DEGs using Lasso regression. **f,** Forest plot of prognostic-related DEGs based on stepwise multivariate Cox regression analysis (*P*-value<0.1). **g,** ROC curves generated to evaluate the predictive value of each biomarker. **h,** A nomogram to predict the 28-day survival probability of sepsis patients. **i,** ROC curves (AUC=0.7267) of the nomogram model in sepsis. **j,** Calibration curve evaluating the predictive ability of the nomogram model. **k,** DCA curve assessing the clinical value of the nomogram model.


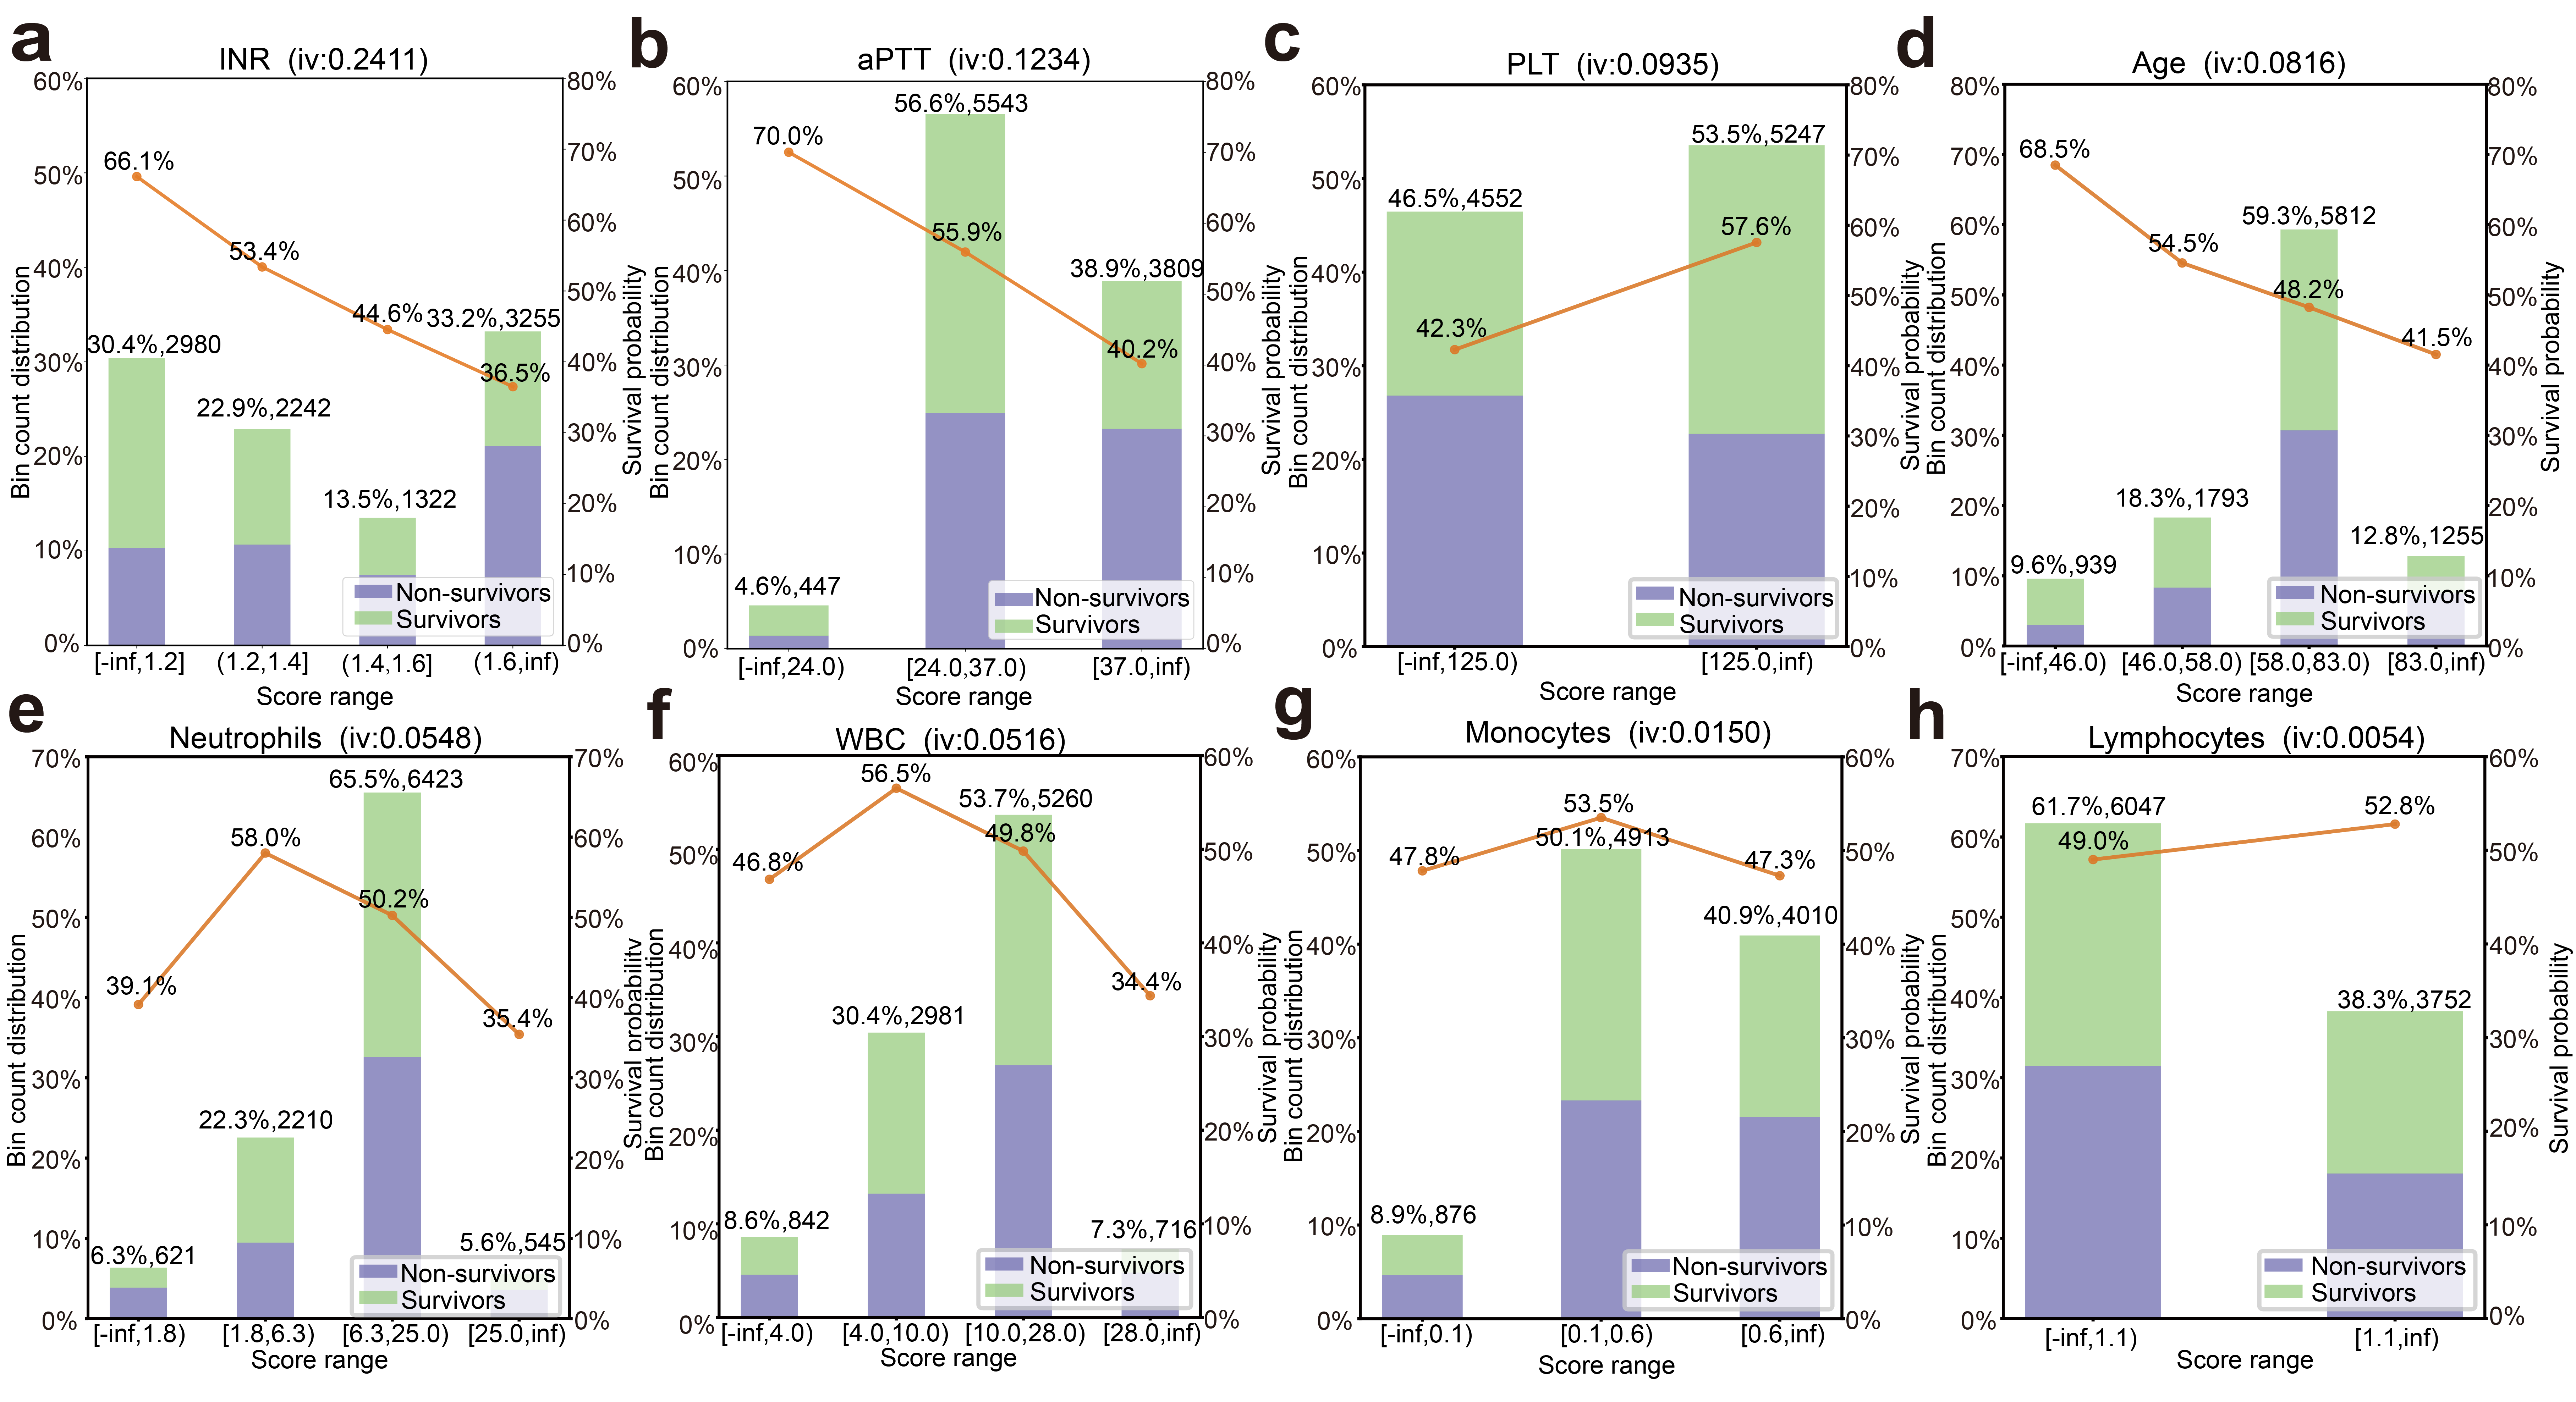


Supplementary Figure 5. Visualization of the bins for the variable purpose as created by the package scorecard. **a-h**, For non-discrete data within routine laboratory measurements, this study utilized chi-square binning to convert them into discrete data, aiming to enhance the sepsis predictors' capabilities of the model by fully extracting their latent information content. WOE (Weight of Evidence) was employed to describe the relationship between various routine laboratory measurements and patient prognosis, while IV (Information Value) reflected the strength of this relationship. It can be observed that INR and APTT both have IV values greater than 0.1, indicating their strong predictive power. In contrast, Platelet Count, Age, Neutrophils, and WBC have IV values ranging from 0.02 to 0.1, signifying moderate predictive capabilities. On the other hand, Lymphocytes and Monocytes exhibit IV values below 0.02, suggesting weak predictive abilities regarding patient prognosis.


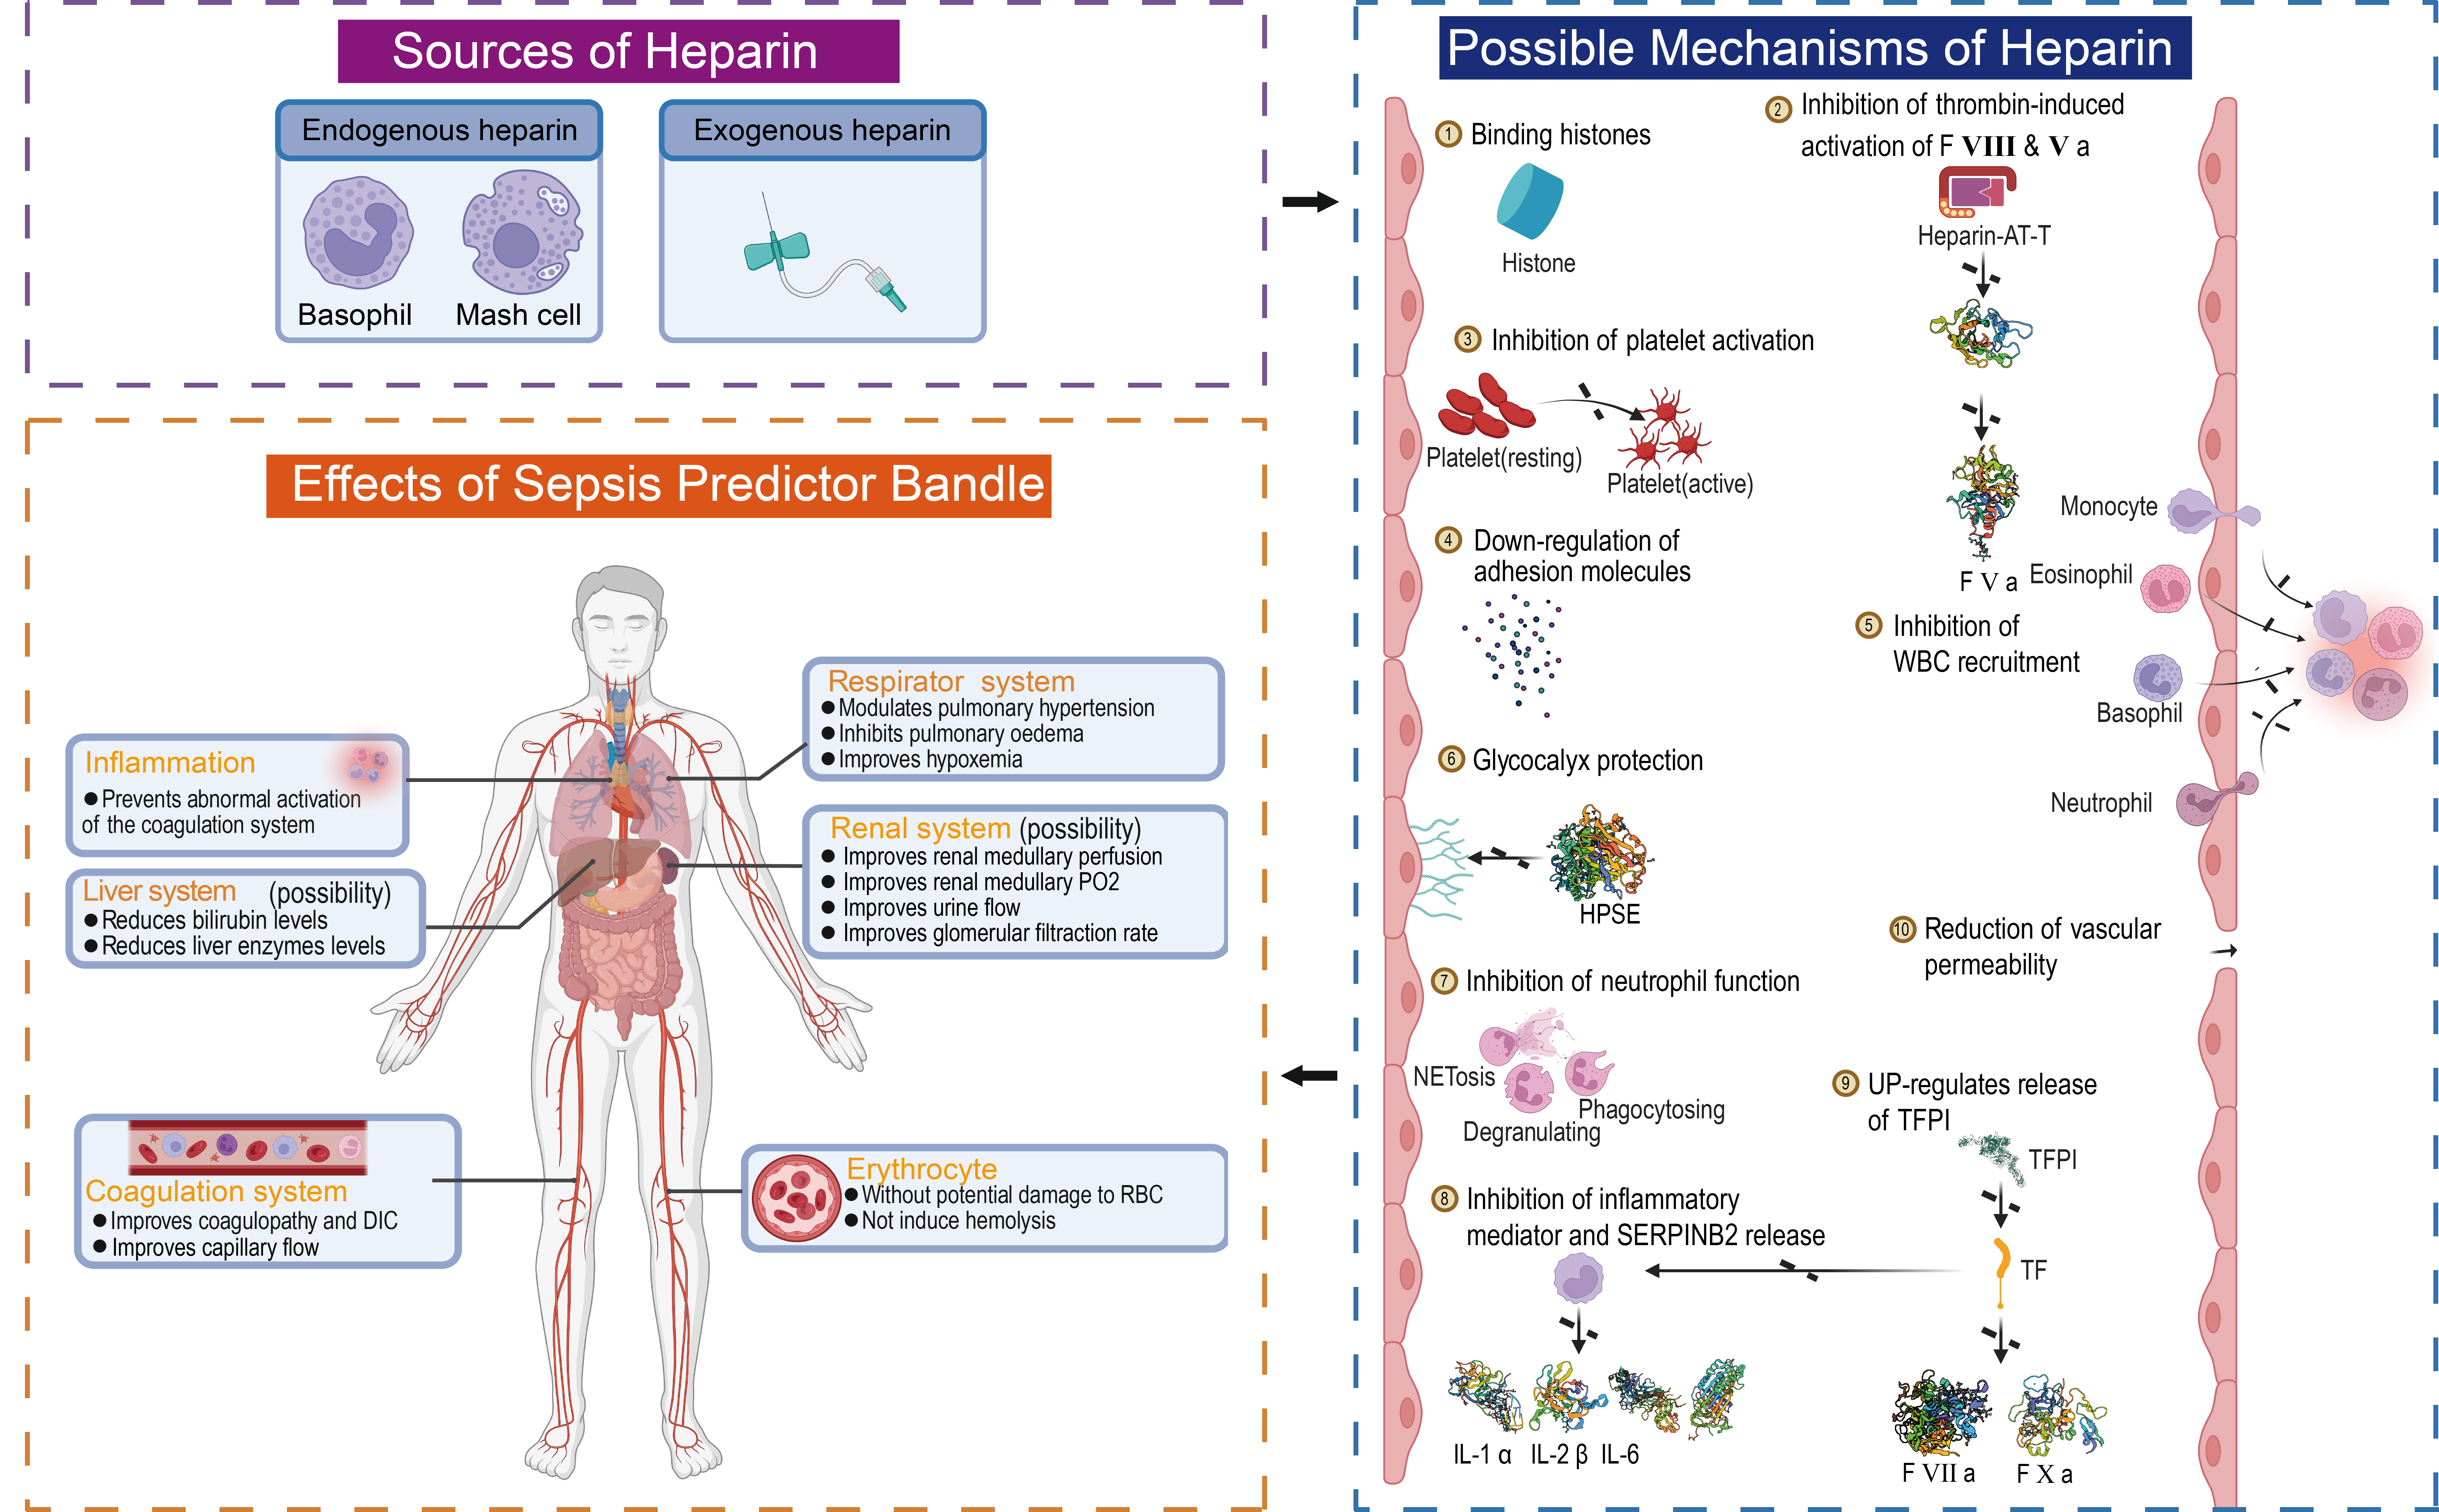


Supplementary Figure 6. Potential benefits of heparin in sepsis management. The figure is drawn by Biorender.

**
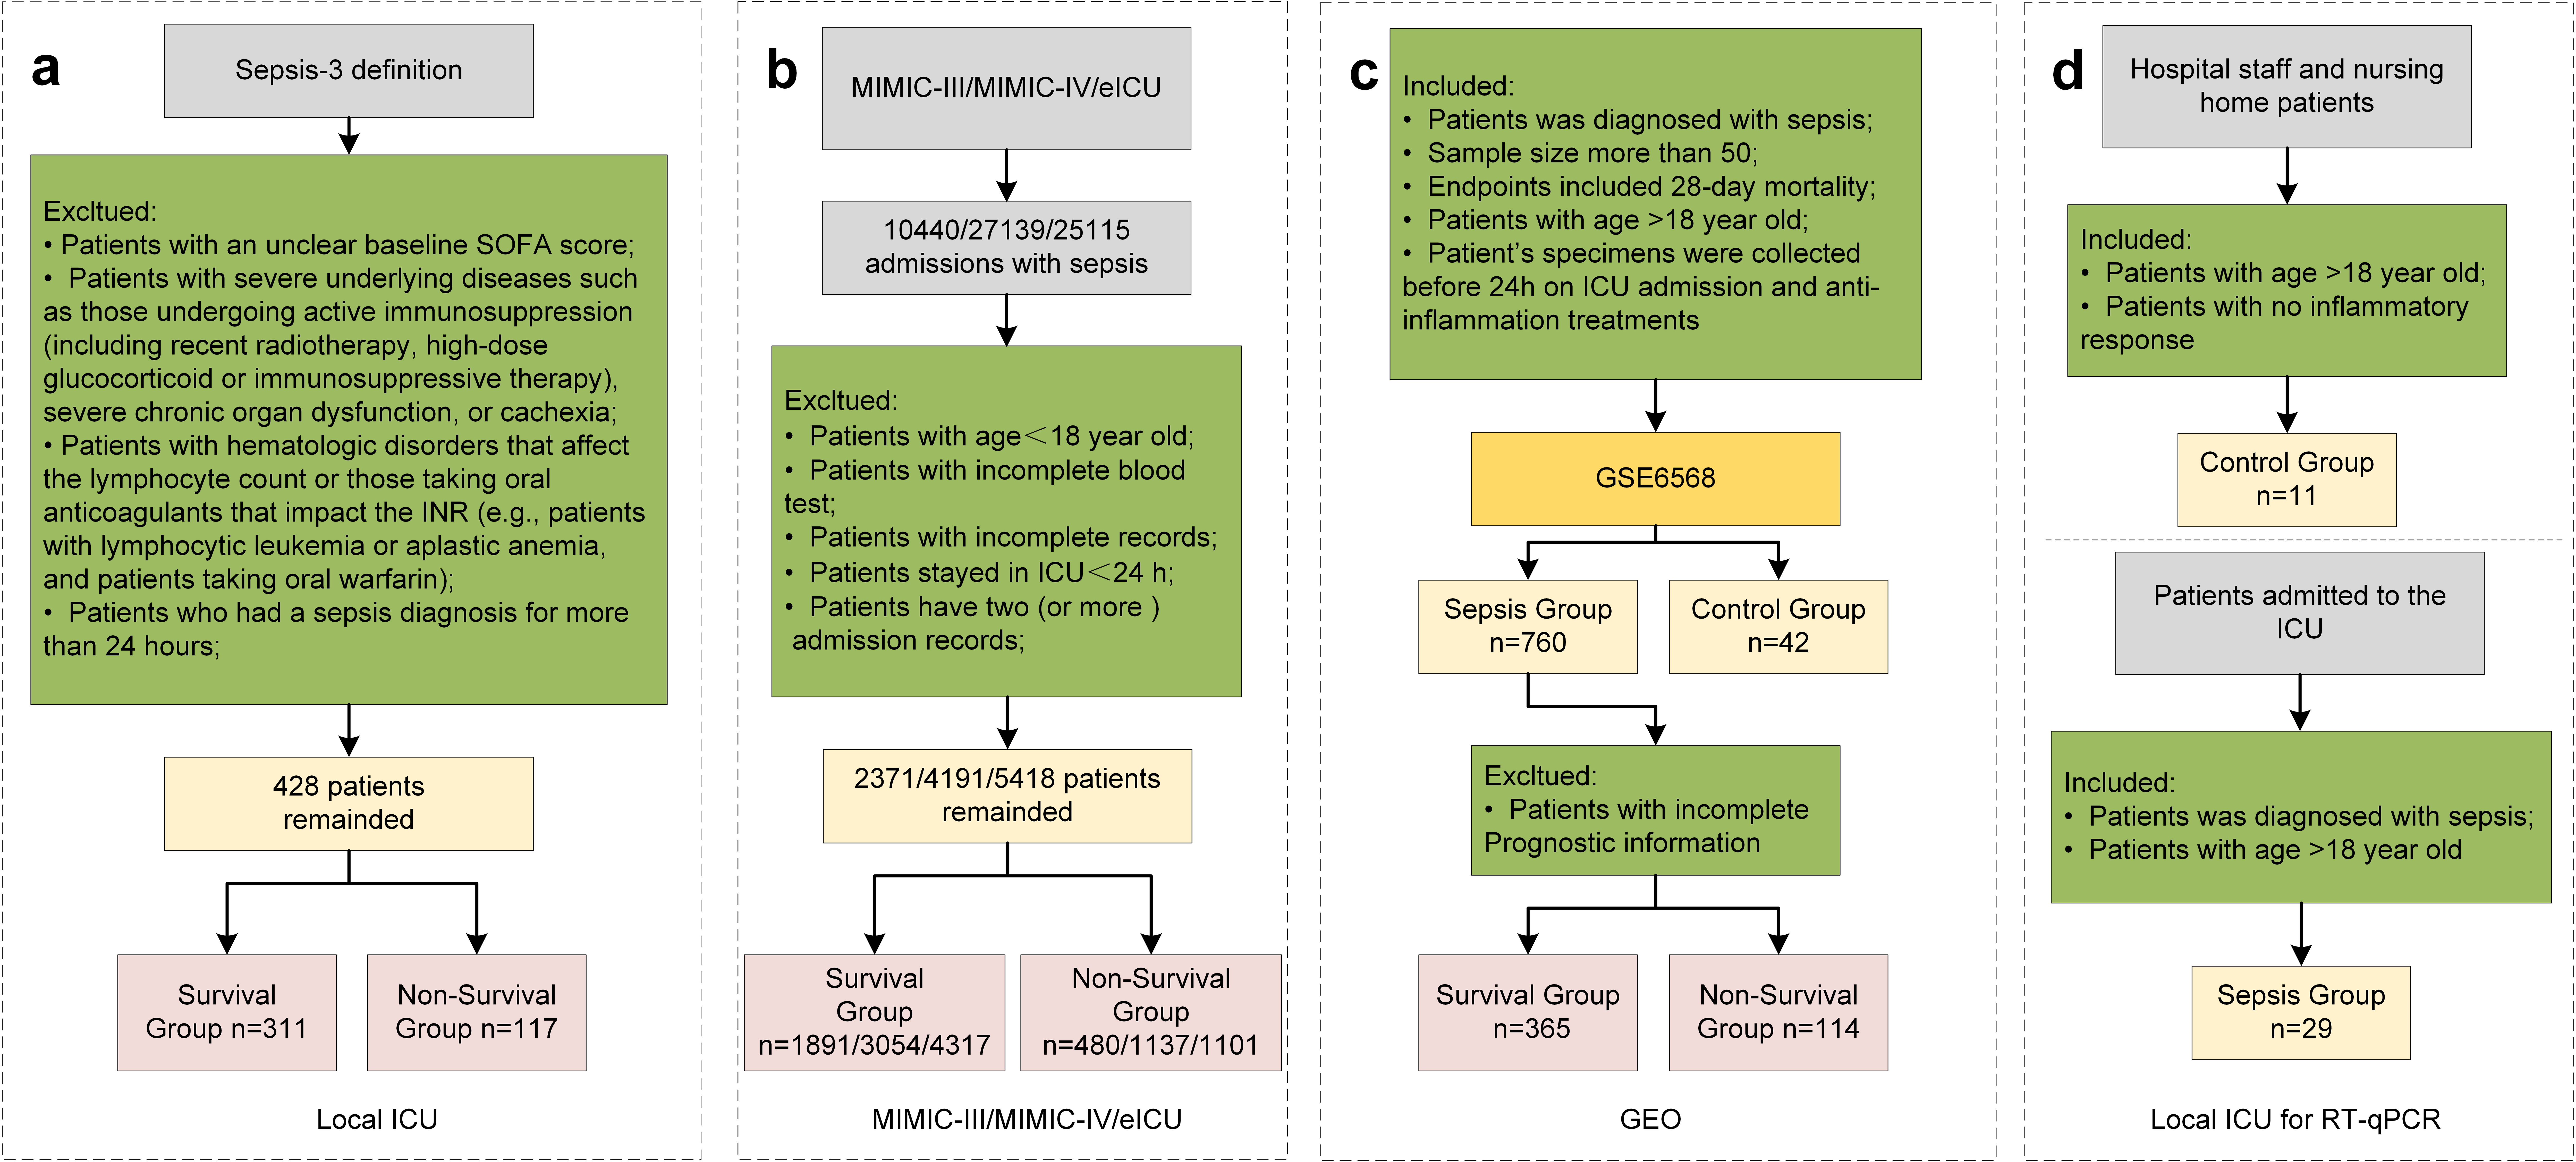
**

Supplementary Figure 7. Flowchart depicting the cohort selection process. **a,** Routine measurement cohort acquisition process for sepsis in local hospitals. **b,** Electronic health record dataset acquisition process for sepsis. **c,** The process of obtaining mRNA expression profiles for DIC-related genes in the database. **d,** the process of obtaining the mRNA expression profiling of genes from a local hospital.


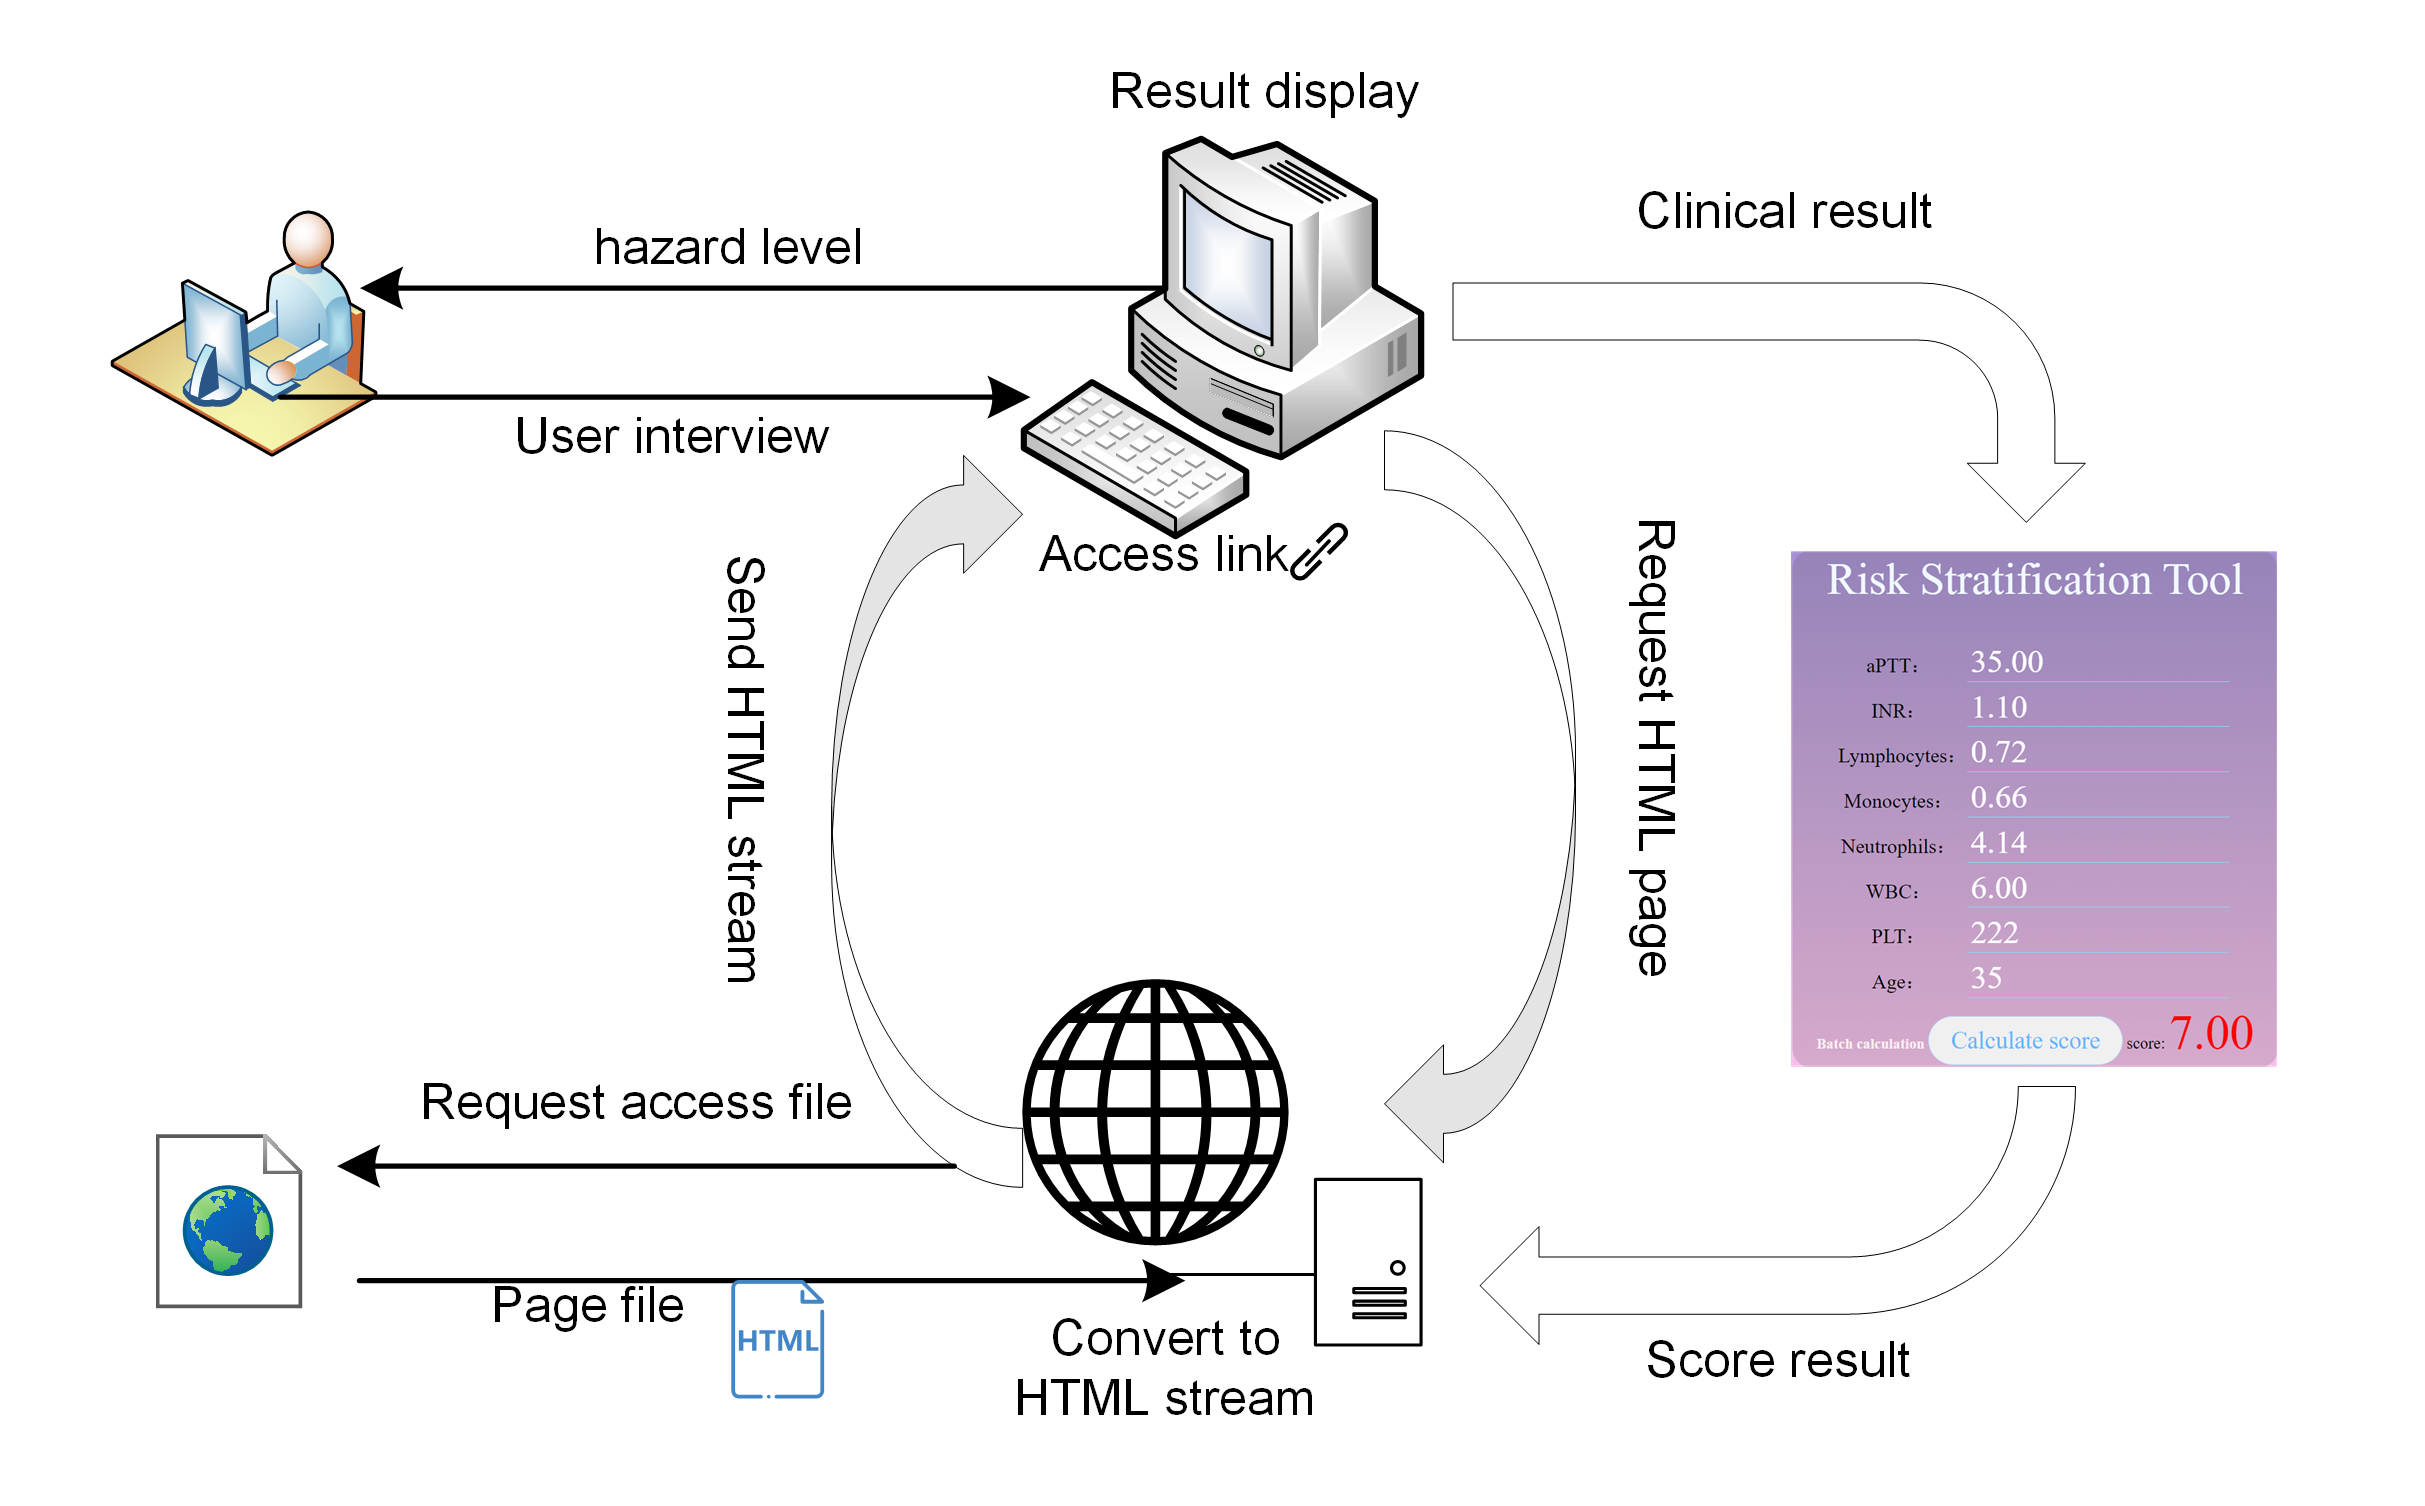


Supplementary Figure 8. Schematic illustration of the working principle of SMART. When the doctor accesses the sepsis subphenotype and SMART platform, first enter the project address of the system correctly in the browser. Then, the browser will send a page request service to the server, and the server will find the file where the system is located according to the project address passed on by the browser. Subsequently, it can be converted into an HTML data stream and returned to the front-end browser for display to the user. Ultimately, the doctor will fill in the patient's clinical information into the system, and the system will calculate and return the three results to the doctor: score, risk level, and subphenotype.

Supplementary Table 1. Prognostic prediction performance of models based on the sepsis predictors.

| **Model** | **MIMIC-III** | | | | | **MIMIC-IV** | | | | |
| --- | --- | --- | --- | --- | --- | --- | --- | --- | --- | --- |
| **AUC** | **ACC** | **Specificity** | **Sensitivity** | **F1** | **AUC** | **ACC** | **Specificity** | **Sensitivity** | **F1** |
| LR | 0.7895 | 0.7203 | 0.7123 | 0.7281 | 0.7256 | 0.7956 | 0.7104 | 0.6947 | 0.7324 | 0.7247 |
| SGD | 0.7761 | 0.7107 | 0.7211 | 0.7005 | 0.7109 | 0.7853 | 0.7123 | 0.6852 | 0.7380 | 0.7250 |
| SVM | 0.8408 | 0.7666 | 0.7666 | 0.7504 | 0.7656 | 0.8539 | 0.7791 | 0.7846 | 0.7738 | 0.7826 |
| DT | 0.8990 | 0.8287 | 0.8011 | 0.8554 | 0.8353 | 0.8946 | 0.8228 | 0.7763 | 0.8667 | 0.8340 |
| RF | 0.9067 | 0.8540 | 0.8211 | 0.8554 | 0.8519 | 0.8964 | 0.8395 | 0.8172 | 0.8511 | 0.8449 |
| LSTM | 0.9111 | 0.8584 | 0.7833 | 0.9312 | 0.8698 | 0.9026 | 0.8470 | 0.8248 | 0.8679 | 0.8535 |
| GRU | 0.9109 | 0.8645 | 0.8135 | 0.9139 | 0.8726 | 0.9018 | 0.8579 | 0.8178 | 0.8959 | 0.8663 |
| GPT_1 | 0.9183 | 0.8829 | 0.8252 | 0.9208 | 0.8847 | 0.9068 | 0.8680 | 0.8533 | 0.9015 | 0.8736 |
| **SepsisFormer** | **0.9301** | **0.8837** | **0.8312** | **0.9346** | **0.8909** | **0.9178** | **0.8705** | **0.8556** | **0.9158** | **0.8760** |

Supplementary Table 2. Optimized Binning of continuous features.

|  | **Unit** | **Low Range** | **Median Range** | **High Range** | ***P* value** |
| --- | --- | --- | --- | --- | --- |
| Age | - | <60 | 60-70 | >70 | <0.001 |
| Arterial Blood Gas | | | | | |
| Anion Gap | mEq/L | <8 | 8-16 | >16 | <0.001 |
| Bicarbonate | mEq/L | <21.4 | 21.4-27.3 | >27.3 | <0.001 |
| Calcium | mg/dL | <8.5 | 8.5-10.5 | >10.5 | <0.001 |
| Chloride | mEq/L | <96 | 96-108 | >108 | <0.001 |
| Glucose | mg/dL | <70 | 70-100 | >100 | <0.001 |
| Potassium | mEq/L | <3.5 | 3.5-5.5 | >5.5 | <0.001 |
| Sodium | mEq/L | <135 | 135-145 | >145 | <0.001 |
| Hematocrit | % | <37 | 37-54 | >54 | <0.001 |
| Hemoglobin | g/dL | <11 | 11-16.5 | >16.5 | <0.001 |
| Lactate | mmol/L | <0.5 | 0.5-1.7 | >1.7 | <0.001 |
| pH | - | <7.35 | 7.35-7.45 | >7.45 | <0.001 |
| Coagulation-inflammation | | | | | |
| INR | - | <0.8 | 0.8-1.2 | >1.2 | <0.001 |
| PT | sec | <10 | 10-12 | >12 | <0.001 |
| aPTT | sec | <24 | 24-37 | >37 | <0.001 |
| Platelet count | ×109/L | <125 | 125-350 | >350 | <0.001 |
| Lymphocytes | ×109/L | <1.1 | 1.1-3.2 | >3.2 | <0.001 |
| Monocytes | ×109/L | <0.1 | 0.1-0.6 | >0.6 | <0.001 |
| Neutrophils | ×109/L | <1.8 | 1.8-6.3 | >6.3 | <0.001 |
| WBC | ×109/L | <4 | 4-10 | >10 | <0.001 |
| Basophils | % | <0.2 | 0.2-0.8 | >0.8 | <0.001 |
| Eosinophils | % | <0.5 | 0.5-3 | >3 | <0.001 |
| Renal | | | | | |
| Creatinine | mg/dL | <0.59 | 0.59-1.35 | >1.35 | <0.001 |
| Urea Nitrogen | mg/dL | <7 | 7-20 | >20 | <0.001 |
| Magnesium | mg/dL | <1.7 | 1.7-2.8 | >2.8 | <0.001 |
| Phosphate | mg/dL | <0.97 | 0.97-1.6 | >1.6 | <0.001 |
| Liver | | | | | |
| ALT | IU/L | <8 | 8-51 | >5 | <0.001 |
| ALP | IU/L | <30 | 30-120 | >120 | <0.001 |
| AST | IU/L | <10 | 10-40 u/L | >40 | <0.001 |
| Bilirubin | mg/dl | <0.3 | 0.3-1.3 | >1.3 | <0.001 |
| Albumin | IU/L | <3.5 | 3.5-5.5 | >5.5 | <0.001 |
| Erythrocyte | | | | | |
| MCH | pg | <27 | 27-34 | >34 | 0.161 |
| MCHC | % | <32 | 32-36 | >36 | <0.001 |
| MCV | fL | <80 | 80-102 | >102 | <0.001 |
| RDW | % | <11.5 | 11.5-14.5 | >14.5 | <0.001 |
| RBC |  | <3.5 | 3.5-5.5 | >5.5 | <0.001 |

pH: potential Hydrogen, INR: International Normalized Ratio, PT: Prothrombin Time, aPTT: activated Partial Thromboplastin Time, WBC: White Blood Cell, ALT: Alanine Aminotransferase, ALP: Alkaline Phosphatase, AST: Aminotransferase, MCH: Mean Corpuscular Hemoglobin, MCHC: Mean Corpuscular Hemoglobin Concentration, MCV: Mean Corpuscular Volume, RDW: Red Cell Distribution Width, RBC: Red Blood Cell

Supplementary Table 3. Baseline characteristics of the MIMIC-III/IV.

| **MIMIC-III**  **MIMIC-IV** | | | | |
| --- | --- | --- | --- | --- |
|  | **Non-survivors**  **(N=480)**  **(N=1137)** | **Survivors**  **(N=1891)**  **(N=3054)** | **All Data**  **(N=2371)**  **(N=4191)** | ***P* value** |
| Age | 69(61-80)  68(58-78) | 64(54-74)  64(53-75) | 65(55-76)  65(54-76) | <0.001  <0.001 |
| Arterial Blood Gas | | | | |
| Lactate | 2.90(1.80-5.00)  2.20(1.50-3.60) | 2.20(1.50-3.30)  1.70(1.20-2.50) | 2.30(1.50-3.60)  1.80(1.30-2.80) | <0.001  <0.001 |
| pH | 7.34(7.25-7.39)  7.35(7.28-7.42) | 7.34(7.32-7.41)  7.38(7.33-7.44) | 7.34(7.30-7.41)  7.38(7.31-7.43) | <0.001  <0.001 |
| Anion Gap | 18(15-21)  16(13-19) | 16(14-19)  14(12-17) | 17(14-20)  14(12-17) | <0.001  <0.001 |
| Bicarbonate | 22(18-26)  21(18-25) | 23(20-27)  24(21-27) | 23(20-27)  23(20-27) | <0.001  <0.001 |
| Calcium | 8.1(7.4-8.8)  8.1(7.6-8.7) | 8.3(7.7-9.0)  8.2(7.7-8.7) | 8.3(7.6-9.0)  8.2(7.7-8.7) | <0.001  <0.05 |
| Chloride | 102(97-107.25)  103(98-108) | 101(97-106)  104(99-108) | 101(97-106)  103(99-108) | 0.093  <0.05 |
| Glucose | 129(98-175)  125(96-163) | 129(103-179)  120(98-153) | 129(101-178)  121(98-156) | 0.077  0.091 |
| Potassium | 4.50(3.90-5.20)  3.80(2.90-4.90) | 4.30(3.80-4.90)  3.30(2.60-4.00) | 4.30(3.80-4.90)  3.40(2.70-4.20) | <0.001  <0.001 |
| Sodium | 138(133-142)  138(134-142) | 138(134-141)  139(135-142) | 138(134-141)  138(135-142) | 0.366  <0.01 |
| Hematocrit | 32.30(28.88-37.75)  29.30(25.50-34.00) | 33.60(29.90-37.70)  28.60(25.30-32.70) | 33.40(29.60-37.70)  28.70(25.30-33.10) | <0.05  <0.001 |
| Hemoglobin | 10.5(9.3-12.3)  9.5(8.3-11.0) | 11.0(9.7-12.6)  9.2(8.1-10.7) | 11.0(9.6-12.6)  9.3(8.2-10.8) | <0.001  <0.01 |
| Renal | | | | |
| Creatinine | 1.90(1.20-3.00)  1.50(0.90-2.60) | 1.40(1.00-2.60)  1.10(0.70-1.80) | 1.50(1.00-2.70)  1.20(0.80-2.00) | <0.001  <0.001 |
| Urea Nitrogen | 40.00(26.00-60.25)  34.00(20.00-56.00) | 29.00(19.00-48.00)  24.00(15.00-40.00) | 31.00(20.00-50.00)  26.00(16.00-45.00) | <0.001  <0.001 |
| Magnesium | 1.90(1.60-2.30)  2.00(1.80-2.30) | 1.80(1.60-2.10)  2.00(1.80-2.20) | 1.80(1.60-2.10)  2.00(1.80-2.20) | <0.01  <0.001 |
| Phosphate | 4.00(3.20-5.30)  4.10(3.70-4.70) | 3.40(2.60-4.30)  4.00(3.60-4.40) | 3.50(2.70-4.50)  4.00(3.70-4.40) | <0.001  <0.001 |
| Coagulation-inflammation | | | | |
| PT | 15.70(13.90-20.82)  16.30(13.60-21.50) | 14.40(13.20-17.05)  14.00(13.00-17.70) | 14.60(13.20-17.75)  15.00(13.10-18.80) | <0.001  <0.001 |
| aPTT | 33.80(28.30-42.38)  37.30(30.20-49.30) | 30.60(26.70-36.60)  33.10(28.80-41.78) | 31.10(27.00-37.60)  34.00(29.10-43.90) | <0.001  <0.001 |
| INR | 1.50(1.27-2.20)  1.50(1.20-2.00) | 1.30(1.10-1.60)  1.30(1.20-1.60) | 1.30(1.20-1.70)  1.40(1.20-1.70) | <0.001  <0.001 |
| Platelet count | 214.5(133.75-330.25)  155.0(86.00-247.00) | 233.0(156-332)  200.5(119-301) | 230(152-331)  189(110-286.5) | <0.05  <0.001 |
| Lymphocytes | 0.86(0.44-1.45)  0.83(0.42-1.47) | 0.95(0.53-1.53)  0.86(0.47-1.47) | 0.92(0.52-1.52)  0.85(0.46-1.47) | <0.05  0.086 |
| Monocytes | 0.44(0.23-0.76)  0.55(0.27-0.98) | 0.41(0.23-0.67)  0.53(0.29-0.89) | 0.42(0.23-0.69)  0.54(0.28-0.92) | 0.064  0.231 |
| Neutrophils | 11.18(6.47-17.02)  10.13(5.62-15.77) | 9.30(5.84-14.12)  8.56(5.39-12.73) | 9.64(5.92-14.64)  8.84(5.44-13.58) | <0.001  <0.001 |
| WBC | 13.80(8.67-20.23)  12.60(7.70-19.00) | 11.7(7.7-17.0)  10.8(7.2-15.8) | 12.2(7.8-17.6)  11.2(7.3-16.6) | <0.001  <0.001 |
| Basophils | 0.0(0.0-0.2)  0.1(0.0-0.3) | 0.1(0.0-0.3)  0.2(0.0-0.4) | 0.1(0.0-0.3)  0.1(0.0-0.3) | <0.001  <0.001 |
| Eosinophils | 0.1(0.0-0.7)  0.2(0.0-1.0) | 0.4(0.0-1.3)  0.5(0.0-1.8) | 0.3(0.0-1.0)  0.4(0.0-1.6) | <0.001  <0.001 |
| Liver | | | | |
| ALT | 27(15-54)  29(17-64) | 25(15-52)  27(15-55) | 26(15-52)  27(16-58) | 0.147  <0.001 |
| ALP | 123(85-190)  109(75-176) | 107(75-152)  101(71-169) | 110(76-159)  104(72-170) | <0.001  <0.01 |
| AST | 41.00(24.00-92.75)  52.00(27.00-112.00) | 33.00(21.00-68.00)  36.00(22.00-70.00) | 34.00(21.00-72.50)  39.00(23.00-79.00) | <0.001  <0.001 |
| Albumin | 2.7(2.2-3.0)  2.6(2.2-3.1) | 2.9(2.6-3.4)  2.8(2.4-3.2) | 2.9(2.5-3.3)  2.7(2.3-3.2) | <0.001  <0.001 |
| Bilirubin | 0.7(0.4-1.5)  0.9(0.5-3.1) | 0.6(0.3-1.1)  0.7(0.4-1.5) | 0.6(0.3-1.2)  0.7(0.4-1.8) | <0.001  <0.001 |
| Erythrocyte | | | | |
| MCH | 30.10(28.10-31.70)  30.30(28.60-32.00) | 30.00(28.50-31.70)  29.85(28.30-31.30) | 30.00(28.40-31.70)  30.00(28.40-31.50) | 0.670  <0.001 |
| MCHC | 32.60(31.40-33.60)  32.40(31.20-33.50) | 33.10(32.00-34.20)  32.40(31.40-33.50) | 33.00(31.90-34.10)  32.40(31.30-33.50) | <0.001  0.191 |
| MCV | 92(86-97)  94(88-99) | 91(86-95)  92(87-96) | 91(86-96)  92(88-97) | <0.01  <0.001 |
| RDW | 16.35(14.90-18.02)  16.70(15.10-18.70) | 15.40(14.20-17.00)  15.90(14.50-17.80) | 15.70(14.25-17.30)  16.10(14.60-18.10) | <0.001  <0.001 |
| RBC | 3.58(3.10-4.10)  3.17(2.70-3.69) | 3.72(3.26-4.21)  3.14(2.74-3.63) | 3.70(3.23-4.19)  3.14(2.73-3.64) | <0.001  0.575 |

Supplementary Table 4. Baseline characteristics of the eICU-CRD and Local ICU.

| **eICU-CRD**  **Local ICU** | | | | |
| --- | --- | --- | --- | --- |
|  | **Non-survivors**  **(N=1101)**  **(N=117)** | **Survivors**  **(N=4307)**  **(N=311)** | **All Data**  **(N=5418)**  **(N=428)** | ***P* value** |
| aPTT | 37.50(32.00-47.30)  45.30(38.70-53.70) | 34.00(29.60-40.60)  40.50(34.50-48.05) | 34.70(30.00-42.00)  41.65(35.38-49.40) | <0.001  <0.001 |
| INR | 1.50(1.27-2.10)  1.41(1.28-1.55) | 1.30(1.11-1.60)  1.29(1.19-1.43) | 1.31(1.20-1.70)  1.31(1.23-1.47) | <0.001  <0.001 |
| Platelet count | 170(97-243)  134(88-207) | 182(121-255)  140(89-212) | 178(116-254)  138(88-212) | <0.001  0.954 |
| Lymphocytes | 0.76(0.43-1.28)  0.51(0.33-0.68) | 0.89(0.49-1.42)  0.55(0.38-0.73) | 0.86(0.48-1.40)  0.54(0.37-0.72) | <0.001  0.148 |
| Monocytes | 0.67(0.32-1.13)  0.32(0.16-0.68) | 0.74(0.40-1.18)  0.49(0.26-0.74) | 0.72(0.38-1.17)  0.46(0.22-0.72) | <0.001  <0.05 |
| Neutrophils | 11.56(6.47-17.76)  9.03(5.71-13.58) | 10.92(6.54-16.00)  10.51(6.24-15.48) | 11.00(6.54-16.29)  9.99(6.12-15.05) | 0.056  0.083 |
| WBC | 14.20(8.60-21.24)  9.80(6.33-15.43) | 13.50(8.60-19.29)  11.68(7.22-16.62) | 13.60(8.60-19.60)  11.02(6.96-16.25) | <0.05  0.075 |
| Age | 69(58-78)  67(53-77) | 65(54-76)  67(55-75) | 66(55-76)  67(55-76) | <0.001  0.664 |

Supplementary Table 5. To assess the optimal number of clusters for subtype analysis using sepsis predictors.

| **Class number** | **Silhouette score** | **Davies-Bouldin score** | **Calinski-Harabasz score** |
| --- | --- | --- | --- |
| 2 | 0.16 | 2.38 | 292.84 |
| 3 | 0.12 | 4.06 | 207.35 |
| 4 | 0.06 | 4.28 | 155.00 |
| 5 | 0.05 | 4.16 | 152.17 |
| 6 | 0.05 | 4.24 | 180.07 |
| 7 | 0.07 | 4.56 | 161.02 |
| 8 | 0.07 | 5.52 | 139.85 |
| 9 | 0.04 | 5.02 | 128.32 |

The Silhouette score, which indicates how similar a sample is to its assigned cluster, ranges from -1 to 1, with higher values (closer to 1) being preferred.

The Davies–Bouldin Score, which quantifies the average similarity between each cluster and its most similar cluster, ranges from zero onward, with lower values (closer to zero) being better.

Calinski–Harabasz score, the ratio between the within-cluster dispersion and the between-cluster dispersion, ranged from zero upward—higher values being better for a dataset.

Supplementary Table 6. Comparison of prognostic prediction performance: pre-trained SepsisFormer compared with other machine learning and deep learning models employing coagulation-inflammatory markers and age obtained from cohort 1 composed of eICU-CRD and MIMIC-III.

| **Model** | **AUC** | **ACC** | **Specificity** | **Sensitivity** | **F1** |
| --- | --- | --- | --- | --- | --- |
| LR | 0.6295 | 0.5997 | 0.6033 | 0.5961 | 0.5992 |
| SGD | 0.6304 | 0.5981 | 0.6012 | 0.5950 | 0.5979 |
| SVM | 0.6513 | 0.6005 | 0.5302 | 0.6705 | 0.6270 |
| DT | 0.7629 | 0.6975 | 0.6695 | 0.7253 | 0.7065 |
| RF | 0.7545 | 0.6861 | 0.6498 | 0.7221 | 0.6979 |
| LSTM | 0.8249 | 0.7524 | 0.7261 | 0.7783 | 0.7600 |
| GRU | 0.8140 | 0.7804 | 0.7972 | 0.8116 | 0.7879 |
| GPT_1 | 0.8225 | 0.7590 | 0.6636 | 0.8533 | 07807 |
| **SepsisFormer** | **0.8558** | **0.8337** | **0.7398** | **0.9264** | **0.8487** |

Supplementary Table 7. Comparison of prognostic prediction performance: fine-tuned and validated SepsisFormer, other machine learning, and deep learning models employing coagulation-inflammatory markers and age obtained from external cohort 2 and cohort 3, collected from MIMIC-IV and Local ICU, respectively.

| **Model** | **MIMIC-IV** | | | | | **Local ICU** | | | | |
| --- | --- | --- | --- | --- | --- | --- | --- | --- | --- | --- |
| **AUC** | **ACC** | **Specificity** | **Sensitivity** | **F1** | **AUC** | **ACC** | **Specificity** | **Sensitivity** | **F1** |
| LR | 0.7173 | 0.6525 | 0.6367 | 0.6674 | 0.6636 | 0.7034 | 0.6471 | 0.7356 | 0.5700 | 0.6333 |
| SGD | 0.7211 | 0.6657 | 0.6343 | 0.6954 | 0.6812 | 0.7020 | 0.6257 | 0.7701 | 0.5000 | 0.5882 |
| SVM | 0.7147 | 0.6611 | 0.5254 | 0.7895 | 0.7053 | 0.7444 | 0.6952 | 0.7011 | 0.6900 | 0.7077 |
| DT | 0.7912 | 0.7363 | 0.7078 | 0.7626 | 0.7030 | 0.7760 | 0.7273 | 0.7701 | 0.6900 | 0.7302 |
| RF | 0.8039 | 0.7560 | 0.7138 | 0.7581 | 0.7615 | 0.7942 | 0.7112 | 0.7931 | 0.6400 | 0.7033 |
| LSTM | 0.8121 | 0.7514 | 0.6852 | 0.8141 | 0.7709 | 0.8007 | 0.7380 | 0.6667 | 0.8000 | 0.7656 |
| GRU | 0.8157 | 0.7693 | 0.7172 | 0.8186 | 0.7848 | 0.8336 | 0.7433 | 0.7128 | 0.7742 | 0.7500 |
| GPT_1 | 0.7914 | 0.7405 | 0.6769 | 0.8007 | 0.7602 | 0.8250 | 0.7487 | 0.7340 | 0.7634 | 0.7513 |
| **SepsisFormer** | **0.8596** | **0.8247** | **0.7037** | **0.9312** | **0.8497** | **0.8364** | **0.7754** | **0.7093** | **0.7940** | **0.7701** |

Supplementary Table 8. Comparison of prognostic prediction performance: SepsisFormer in septic patients using coagulation-inflammatory markers and age obtained from the Local ICU cohort under different domain adaptation methods.

| **Method** | **AUC** | **ACC** | **Specificity** | **Sensitivity** | **F1** |
| --- | --- | --- | --- | --- | --- |
| No-adaptation | 0.8364 | 0.7754 | 0.7093 | 0.8317 | 0.8000 |
| Mean-teacher | 0.8014 | 0.7594 | **0.8046** | 0.7200 | 0.7619 |
| Whitening | 0.8091 | 0.7807 | **0.8046** | 0.7600 | 0.7876 |
| Moment Matching | 0.8374 | 0.7540 | 0.7558 | 0.7525 | 0.7677 |
| **MMID** | **0.8540** | **0.7914** | 0.7209 | **0.8515** | **0.8152** |

Supplementary Table 9. Different roles of the diagnostic genes.

| **Genes** | **Description** | **Function** |
| --- | --- | --- |
| CD59 | CD59 Molecule | Potent inhibitor of the complement membrane attack complex action |
| CD59  P2RX1 | CD59 Molecule  Purinergic Receptor P2X 1 | Prevents hemolysis |
| Correlates with the severity of organ damage assessed by SOFA in septic patients |
| Involves c-SRC-related tyrosine phosphorylation of the creatine transporter in skeletal muscle during sepsis |
| Enables extracellularly ATP-gated monoatomic cation channel activity |
| P2RX1  CFD | Purinergic Receptor P2X 1  Complement Factor D | Promotes neutrophil glycolysis and NETs formation |
| Proteases catalyze the cleavage of factor B, the rate-limiting step of the alternative pathway of complement activation |
| CFD  SERPINB2 | Complement Factor D  Serpin Family B Member 2 | Inhibits the activation of complement, neutrophils, and platelets |
| Inhibits urokinase-type plasminogen activator |
| SERPINB2 | Serpin Family B Member 2 | Appearance in plasma was associated with non-survival of the septic patient |
| Regulates immune response in renal injury and aging |
| Links to cellular senescence, inflammation, and coagulation |
|  |

Supplementary Table 10. 28-day survival predicted results and actual results Kappa value.

|  | **Kappa** | **Asymptotic standard error** | **z** | ***P* value** |
| --- | --- | --- | --- | --- |
| Linear | 0.266 | 0.037 | 6.841 | <0.001 |

Supplementary Table 11. Different roles of the prognostic genes.

| **Genes** | **Description** | **Function** |
| --- | --- | --- |
| STAT5B | Signal transducer and activator of transcription 5B | Involves the JAK/STAT signaling pathway |
| Positively regulates hematopoietic differentiation, including B cells, T cells, NK cells, erythroid cells, and megakaryocytic cells |
| Endotoxin attenuates growth hormone-induced hepatic insulin-like growth factor I expression by inhibiting JAK2/STAT5 signal transduction and STAT5b DNA binding |
| Hyperactivation of STAT5B is associated with the development of various blood malignancies, tumors and a syndrome of severe allergic inflammation |
| Mutations in the STAT5B gene are associated with autoimmunity and immunodeficiency |
| MTHFR | Methylenetetrahydrofolate reductase | Polymorphism of MTHFR is associated with the activation of the coagulation system, disease susceptibility, and sepsis |
| Both low and excessive expression can worsen MTX-induced myelosuppression |
| HPSE | Heparanase | Acts as procoagulant by increasing the generation of activation factor X in the presence of tissue factor and activation factor VII |
| Compromises the endothelial glycocalyx |
| Affects activities of several types of innate immunocytes |
| Promotes inflammation and virus replication to promote cell and tissue damage |
| Enhances tumor progression, size, metastasis, and angiogenesis |
| AAK1 | AP2-associated kinase 1 | Restrains the coagulation response |
| Expresses in mononuclear cells, T lymphocytes, and NK cells, mediating virus endocytosis and promoting inflammatory response |
| MX1 | MX dynamin like GTPase 1 | Interferon-induced dynamin-like GTPase with antiviral activity against a wide range of RNA viruses and some DNA viruses |

Supplementary Table 12. To assess the optimal number of clusters for subphenotype analysis using coagulation-inflammatory markers and age.

| **Class number** | **Silhouette score** | **Davies-Bouldin score** | **Calinski-Harabasz score** |
| --- | --- | --- | --- |
| 2 | 0.52 | 1.03 | 2877.16 |
| 3 | 0.48 | 2.34 | 1672.61 |
| 4 | 0.30 | 2.03 | 1792.53 |
| 5 | 0.28 | 3.00 | 1355.92 |
| 6 | 0.27 | 2.45 | 1141.57 |
| 7 | 0.23 | 3.49 | 992.48 |
| 8 | 0.24 | 2.77 | 979.37 |
| 9 | 0.20 | 2.62 | 952.58 |

Silhouette score, a measure of how similar a sample is to its cluster, ranged from -1 to 1—values closer to 1 being better.

Davies–Bouldin Score, a measure of the average similarity of each cluster with its most similar cluster, ranged from zero upward—values closer to zero being better.

Calinski–Harabasz score, the ratio between the within-cluster dispersion and the between-cluster dispersion, ranged from zero upward—higher values being better for a dataset.

Supplementary Table 13. Comparison of clinical characteristics between subphenotypes of patients with sepsis.

| **MIMIC III**  **MIMIC IV**  **eICU-CRD**  **Local ICU** | | | |
| --- | --- | --- | --- |
| **Cluster (patient number)** | **CIS1 (*N*=1973)**  **CIS1 (*N*=3347)**  **CIS1 (*N*=4360)**  **CIS1 (*N*=366)** | **CIS2 (*N*=398)**  **CIS2 (*N*=844)**  **CIS2 (*N*=1058)**  **CIS2 (*N*=62)** | ***P* value** |
| aPTT(s) | 30.20(26.60-35.60)  32.20(28.40-38.70)  33.50(29.20-39.00)  40.40(34.50-46.80) | 42.50(31.82-71.60)  56.15(39.00-76.90)  44.45(34.80-64.00)  55.80(46.03-68.72) | <0.001  <0.001  <0.001  <0.001 |
| INR | 1.30(1.10-1.60)  1.30(1.20-1.60)  1.30(1.10-1.60)  1.30(1.22-1.45) | 1.70(1.30-2.50)  1.70(1.30-2.40)  1.60(1.30-2.50)  1.43(1.29-1.72) | <0.001  <0.001  <0.001  <0.001 |
| Lymphocytes  (×109/L) | 0.92(0.52-1.48)  0.81(0.43-1.38)  0.81(0.46-1.30)  0.53(0.37-0.71) | 0.94(0.50-1.78)  1.09(0.59-1.81)  1.11(0.61-1.89)  0.61(0.39-0.93) | 0.156  <0.001  <0.001  <0.05 |
| Monocytes  (×109/L) | 0.39(0.22-0.62)  0.50(0.26-0.83)  0.67(0.36-1.07)  0.44(0.22-0.70) | 0.66(0.28-1.51)  0.79(0.39-1.46)  1.04(0.55-1.73)  0.52(0.24-1.02) | <0.001  <0.001  <0.001  0.193 |
| Neutrophils  (×109/L) | 9.34(5.82-13.93)  8.52(5.30-12.80)  10.51(6.32-15.44)  10.95(1.15-38.12) | 11.47(6.66-20.08)  10.79(6.30-16.92)  14.05(8.28-21.02)  15.73(1.43-71.53) | <0.001  <0.001  <0.001  <0.01 |
| WBC  (×109/L) | 11.70(7.60-16.50)  10.70(6.90-15.50)  12.72(8.20-18.10)  10.69(6.94-15.58) | 16.65(9.60-26.65)  14.40(8.97-21.80)  18.30(11.70-26.16)  14.55(8.11-24.41) | <0.001  <0.001  <0.001  <0.01 |
| Platelet count  (×109/L) | 231.00(156.00-331.00)  198.00(119.00-300.00)  178.00(120.00-250.00)  144.00(96.00-218.25) | 215.50(130.00-343.75)  146.00(83.75-234.00)  178.00(101.25-274.00)  108.00(48.25-164.25) | 0.147  <0.001  0.812  <0.001 |
| Age | 66(58-77)  68(58-78)  68 (59-78)  69(60-77) | 58(43-68)  53(41-64)  51(34-64)  46(33-53) | <0.001  <0.001  <0.001  <0.001 |

Supplementary Table 14. SIRI values of the four study cohorts.

|  | **MIMIC-III** | **MIMIC-III** | **eICU-CRD** | **Local ICU** |
| --- | --- | --- | --- | --- |
| Subphenotype | | | | |
| CIS1 | 3.52(1.58-7.94) | 4.78(1.98-10.37) | 7.81(3.38-16.31) | 8.14(3.31-16.73) |
| CIS2 | 5.81(2.00-26.05) | 6.95(2.74-16.77) | 11.66(4.60-25.70) | 8.77(2.73-24.54) |
| *P* value | <0.001 | <0.001 | <0.001 | <0.001 |
| Risk level | | | | |
| Mild | 1.85(1.04-2.99) | 2.21(1.22-4.34) | 3.36(1.67-6.48) | 1.78(1.34-6.72) |
| Moderate | 3.43(1.74-7.48) | 4.44(2.07-8.77) | 6.61(3.00-12.77) | 5.36(2.69-10.73) |
| Severe | 6.63(2.37-16.10) | 7.30(2.91-16.06) | 11.16(4.91-22.67) | 11.31(3.90-22.08) |
| Dangerous | 20.93(2.09-59.26) | 26.56(14.65-55.47) | 24.58(12.82-44.46) | 24.94(16.10-39.92) |
| *P* value | <0.001 | <0.001 | <0.001 | <0.001 |

SIRI= (Neutrophil count × Monocyte count) / Lymphocyte count

Supplementary Table 15. Association of heparin with survival rate and days of survival in patients with subphenotypes combined with risk stratification.

| **Subgroup** | **Heparin** | **Control** |  |  |  | ***P* value** |
| --- | --- | --- | --- | --- | --- | --- |
| CIS1_Mild | 90.14%  (64/71) | 93.12%  (176/189) | -2.98% | 10.76 | 8.00 | 0.9992 |
| CIS1_Moderate | 80.05%  (337/421) | 78.66%  (1102/1401) | 1.39% | 11.31 | 9.00 | <0.001 |
| CIS1_Severe | 66.38%  (152/229) | 63.80% (624/978) | 2.58% | 10.92 | 8.00 | <0.001 |
| CIS1_Dangerous | 50.00%  (3/6) | 46.15%  (24/52) | 3.85% | 1.30 | 3.00 | 0.8267 |
| CIS2_Mild | 95.65%  (22/23) | 96.08%  (49/51) | -0.43% | 4.60 | 6.00 | 0.8523 |
| CIS2_Moderate | 80.00%  (80/100) | 75.23%  (164/218) | 4.77% | 15.88 | 10.50 | <0.05 |
| CIS2_Severe | 70.33%  (64/91) | 53.46%  (170/318) | 16.87% | 8.28 | 9.00 | <0.001 |
| CIS2_Dangerous | 100.00%  (5/5) | 47.37%  (18/38) | 52.63% | 12.19 | 22.50 | <0.05 |

Supplementary Table 16. SepsisFormer parameter setup.

| **Input predictor** | 36/8 |
| --- | --- |
| **Dense layer1** | 216/66/48 |
| **Dense layer2** | 36/8 |
| **Number of attention heads** | 8 |
| **Head dimension** | 36/8 |
| **Batch size** | 200 |
| **Drop ratio** | 0.1 |

Supplementary Table 17. Primer sequences for real-time polymerase chain reaction.

| **Primer name** | **Primer sequence (5ʹ to 3ʹ)** |
| --- | --- |
| GAPDH-F | CAGGGCTGCTTTTAACTCTGGT |
| GAPDH-R | GATTTTGGAGGGATCTCGCT |
| SERPINB2-F | TGATGCGATTTTGCAGGCAC |
| SERPINB2-R | AAGCTCGCAGACTTCTCACC |
| P2RX1-F | TCTACGTCATCGGGTGGGT |
| P2RX1-R | CGTAGTCAGCCACATCCCAG |
| CFD-F | GACAGCTGCAAGGGTGACTC |
| CFD-R | GTAGATCCCGGGCTTCTTGC |
| CD59-F | GCGCCGCCAGGTTCT |
| CD59-R | GACGGCTGTTTTGCAGTCAG |

Supplementary Method 1. Detailed algorithm derivation of SepsisFormer.

**Domain-adaptive Generator.** We propose a heterogeneous data domain adaptation method in sepsis predictors' space between the source domain and the target domain. The sepsis predictors space ( ) and dimension () are consistent, but the sepsis predictors distribution () is inconsistent. To ensure the spatial distribution consistency of sepsis predictors, we determine the origin moments and center moments in the high-dimensional space of the target domain. Based on these moments, select the sepsis predictors distribution of the target domain (unknown center dataset such as Local ICU), ensuring that the predictors from both domains are in the same sepsis predictors space. By using origin and center moments to lock the sepsis predictors' space of the target domain, map to the source domain (eICU-CRD and MIMIC-III), and eliminate the sample points outside the space, the distance between the source and the target domain can be closer than the original distance. This alignment promotes domain invariant feature learning in the model.

To address the imbalance in the survival-death ratio, we employ the Synthetic Minority Oversampling Technique (SMOTE) as the top-performing generative technique.Pseudo-samples are generated using SMOTE and integrated with the original sepsis predictors space. The original set space and pseudo-sample are integrated into. Specifically, where is the standard deviation and is the mean of the distribution. In the sepsis predictors of the original sepsis patients, the distribution of indicator values is as follows:

**Preliminary input**. In the SepsisFormer, we utilize the patient's blood test covariates as input, including the number of Arterial Blood Gas, Coagulation-inflammatory, Erythrocyte, Renal, and Liver indicators under the sepsis predictors. Additionally, patients have a static covariate, age, represented as. The prognosis of the sepsis patient was as follows, and the prognosis outcomes of the patient are denoted as.

In the processing step, we begin by selecting the predictors in the sepsis predictors that satisfy the criteria. Then, to address the issue of data heteroscedasticity, we use the logarithm transformation, denoted as, to the selected predictors. This transformation does not alter the nature and correlation of the data but enhances stability. Next, to mitigate the differences between sepsis predictors, we normalized the transformed predictors, to a range between 0 and 1 using to normalize to (is the minimum, is the maximum). This normalization process helps balance the contribution of each predictor under the sepsis predictors and improves the convergence speed of the model. The formula for normalization is as follows:

**Encoder for feature extraction.** The feature extraction layer of SepsisFormer consists of an integrated network of *K* (*K*=8) Transformer encoders. The feature extraction processis divided into five sections, as follows:

**Section 1: Embedding.** The normalized indicators are used as input to the feature extraction layer. Let the column vector, the row vector. Let represent indicator-target pair, and each indicator is encoded using Linear Layer, as explained in detail below:

Where, is the learnable parameter matrix in the neural network.

**Section 2: Indicator dependence.** The encode indicators are then inputted to the first Transformer Encoder layer. The output of the first Transformer Encoder layer is then passed onto the second layer, and so on. Each Transformer Encoder layer consists of two sublayers. In the first sublayer, the self-attention mechanism extracts the long-term dependencies between indicators in the sepsis predictors through linear transformation and inner product calculation between ， , . Specifically, the of indicator interacts with the of other indicators in the patient's sepsis predictors, and the attention weight score is used to quantify the long-term dependency relationship:

Among, ; Where and respectively represent the projection weight matrix corresponding to the input sequence.

The self-attention output corresponding to the indicator is obtained by weighted summation of and:

Where, and represents the projected weight matrix corresponding to the input sequence.

**Section 3: Enhanced sepsis predictors.** This paper utilizes multi-head attention to simultaneously integrate the long-term dependencies of sepsis predictors from different levels and perspectives, thereby enhancing the feature extraction capability of the model. All single-headed outputs are aggregated, and a local dependent featureis extracted. A linear layer is then used to project the dimension back to its original size. The global long-range dependent eigenvector is obtained, as follows:

Where represents the single-headed attention output, denotes the number of multiple heads, and is the learnable projective parameter matrix.

**Section 4: Information fusion.** These long-range dependent features are directly added across levels to the current input, and then passed through the Layer Normalization. This process is followed by the final output of the first sublayer of Transformer Encoder layer.

**Section 5: Feed-Forward Network.** In the Feed-Forward Network sublayer, the output passes through two dense layers. The first dense layer maps the global long-range dependent feature to a size five times larger, thereby increasing the feature space dimension and improving the model's ability to fuse sepsis predictor information. The second dense layer projects it back to its original size. The final output of the Transformer Encoder layer obtained in this paper is given by:

Where, is the learnable parameter matrix in the neural network. stands for GELU activation function.

**Prognostic prediction.** In this paper, a Multi-Layer Perceptron (MLP) is used as a prognostic predictor in SepsisFormer. The indicator information in the sepsis predictors is fused and flattened, resulting in a two-channel feature vector. This future vector,, is then mapped to a higher dimensional hidden state, using a Linear-layer of 64 neurons. To introduce nonlinearity and prevent overfitting, the GELU activation function is applied:

Where, is the learnable parameter matrix, stands for the GELU activation function.

Subsequently, the context vector is predicted through a fully connected layer for binary classification. Finally, the mortality rate of patients was obtained through Softmax function:

Where, denotes the learnable parameter matrix in the neural network.

**Objective function.** To optimize model training, we utilize a label-smoothed cross-entropy loss function. This approach addresses the variations in sepsis predictors in the MIMIC dataset. The cross-entropy loss function measures the discrepancy between prognostic predictions and true labels. Additionally, label smoothing penalizes overly confident prognostic predictions, which helps mitigate overfitting. The formula for the label-smoothed cross-entropy loss is as follows:

Where *q* represents the true label, *p* denotes the prognosis prediction obtained from SepsisFormer, and N represents the number of patients.

**Model evaluation metrics.** In this study, the SepsisFormer model developed in this paper is compared with traditional machine learning models including Random Forest (RF), Decision Tree (DT), Support Vector Machine (SVM), Logistic Regression (LR), Stochastic Gradient Descent (SGD), as well as deep learning models such as Long Short-Term Memory (LSTM), Gated Recurrent Unit (GRU), and GPT_1. Prognostic predictionperformance is evaluated using metrics such as area under the curve (AUC), accuracy, specificity, sensitivity, and F1-score.

Supplementary Method 2. DEGs screening steps and RT-qPCR experimental steps.

DEGs between sepsis (n=760) and healthy control (n=42) blood samples were identified using "limma" R package. Subsequently, the candidate biomarkers were identified through the intersection of CRGs, IRGs, and DEGs. We analyzed the obtained intersection genes based on KEGG, GO, and protein-protein interactions (PPI) to understand the underlying biological mechanisms and establish a significant association.

Four hundred seventy-nine sepsis patients with complete survival data were enrolled and identified DEGs between septic survivors (n=365) and non-survivors (n=114) transcriptomes, which were genetically analyzed using gene set enrichment analysis (GSEA). Subsequently, the candidate biomarkers were identified through the intersection of DIC-related genes and DEGs. Furthermore, an analysis of the PPI of these intersecting genes was conducted.

mRNA was isolated from PBMCs using TrasZol Up (TransGen, China) following the manufacturer's instructions. The RNA concentration was determined using a Nano-400a spectrophotometer (ALLSHENG, Hangzhou Allsheng Instruments Co., Ltd., China). For reverse transcription and cDNA synthesis, 0.5ug RNA was used with the one-step cDNA reverse transcription kit (TransGen, China) following the manufacturer's instructions. The qPCR experiment was conducted on the 7500 Real-Time PCR System (ABI, Thermo Fisher Scientific) using the SYBR-Green mixture (TransGen, China) with the following thermocycling conditions: 40 cycles at 94°C for 5 seconds and 60˚C for 30 seconds. Relative mRNA quantities were normalized by GAPDH expression. The primer sequences used in the RT-qPCR are listed in Supplementary Table 15.

Supplementary Method 3. Detailed algorithm derivation of SMART.

In this retrospective study, we advanced risk stratification by refining it through high-risk and low-risk sepsis patients, creating the Sepsis Mortality And Risk Tool (SMART) model and developing a corresponding web-based risk scoring system. The scoring system primarily employs a lasso-based feature selection method driven by medical knowledge. The core code is implemented using scorecardpy Python package (<https://github.com/ShichenXie/scorecardpy> version 0.1.9.6). The simplified procedure of medical knowledge-driven supervised SMLR can be outlined as follows.

**Data preprocessing and splitting**. Seven coagulation-inflammatory markers and age are considered risk variables, and survivor/non-survivor is the target variable. Data augmentation was employed on MIMIC-III and IV to address the issue of imbalanced mortality rates, resulting in a total of 9,799 sepsis patients used for supervised modeling. Data are encoded into numerical format and then split into training and testing sets at 7:3.

**Medical knowledge-driven variable binning**. Ordered continuous variables are discretized using the supervised bottom-up method ChiMerge. However, ChiMerge tends to generate a larger number of bins. In this study, a medical knowledge-driven criterion is proposed for optimizing bins. Firstly, variable binning is performed, and tests are then conducted on all pairs of initial intervals. Those adjacent bins with are merged. Secondly, the information value for each binned variable is calculated to predict the power of each variable about the target variable--survivor or non-survivor. When the number of bins ranges from 2 to 8, the inflection point on the curve formed by the corresponding information value is identified as the optimal number of bins. Thirdly, the optimal binning points are identified based on the lower and upper limits of the normal range (as specified in Table 2) for each risk factor. Pseudo codes are provided.

**Weight of evidence (WOE) transformation, information value (IV), and lasso-based logistic regression.** The WOE transformation and IV are employed to assess and explain the association between risk factors and the predictive event. WOE converts the original markers into a more informative and predictive format, indicating the difference between the "proportion of survivors in the current bin among all survivors" and the "proportion of non-survivors in the current bin among all survivors." IV reflects the ability of the risk factor to distinguish between survival and non-survival under the current binning method, with higher IV values indicating more substantial prognostic capabilities for that factor. The formulas are as follows：

Wherein, and denote the number of survivors and non-survivors in the bin for the coagulation-inflammatory marker, while, and represent the total number of survivors and non-survivors in the bin for the entire sample. The represents the total number of bins.

Considering the heterogeneity of the data, logistic regression with LASSO penalty is developed to reduce the impact of abnormal data on the model. Lasso regularization mitigates high variance in logistic regression coefficients with numerous correlated parameters. The parameter of L1 regularization can be adjusted to control the sparsity of coefficients. A larger leads to more feature coefficients becoming zero, reducing the variance of coefficients and facilitating feature selection. The lasso-based logistic regression models are expressed as follows:

Where are the responses, is the probability, are the coefficients, and is the complexity parameter that controls the strength of regularization. Cross-validation is employed to dynamically choose an optimal that minimizes the deviance.

**Scorecard development and model evaluation**

To visualize and interpret this function for clinical application, we mapped its results to a scorecard.

Where is the score when probabilities of non-survival and survival are equal, is a margin while against, is a probability of non-survival/survival probability.

We set a target score, when, the point-to-double odds (pdo) refer to the difference when the is halved. Here,, and . These initialization factors were brought back into the following formula.

Then,

Based on the setting above, the score function can be deduced as follows.

To evaluate the prognostic performance of SMART model, we compared the efficiency of the model to the other five clinical scoring methods, including Sequential Organ Failure Assessment (SOFA), quick sequential organ failure assessment (qSOFA), lactate in patients with sepsis (LIP), acute physiology and chronic health evaluation II (APACHEII), and systemic inflammatory response syndrome (SIRS).

**Web-based risk stratification system**

A visual web interface was developed using HTML5 and jQuery 3.2.1. An interactive method was employed to compute the risk score and define the risk level of patients.

Supplementary Method 4. Pseudocode of our proposed discretization algorithm based on ChiMerge.

| **Algorithm** 1: Pseudocode of our proposed discretization algorithm based on ChiMerge. |
| --- |
| **Input:** A is MIMIC data set. The max num of bin. Merge the critical p-Value of adjacent bins. The minimum percentage of final binning class number over total.  **Output:** Optimal binning dataframe.  1: **procedure** Discretization(A, minN)  2: **for** A[i] ∈ [A[aPTT],A[INR],…,A[age]] **do**  3: sorted(A[i])  4: A[i] = set(A[i]) // Duplicate removal  5: **while** p < 0.05 and numbin>minN and minimum percentage < 0.05 **do**  6: numbin = len(A[i])  7: **for** j ∈ A[i] **do**  8: chivalue[j] = chi square test(merge(A[i][j], A[i][j+1]))  9: **end for**  10: min(chivalue[j])  11: merge(A[i][j], A[i][j+1]  12: numbin = len(A[i])  13: the number percentage of people in each bin  14: **end while**  15: calculation iv and the optimal number of bins  16: **end for**  17: **return** Optimal bin  18: **end** **procedure** |

Supplementary Method 5. Adjust bin.

| **Algorithm** 2: Adjust bin. |
| --- |
| **Input:** Bin Splitting Points. The mp is the point of entry based on medical knowledge.  **Output:** Optimized binning by medical knowledge.  1: **procedure** Adjustment (A, zp, mp)  2: **for** A[i] ∈ [A[aPTT],A[INR],…,A[age]] **do**  3: sorted(zp,mp)  4: delete point of entry within the normal range  5: **while** the survival curve is not monotonic or inverted 'v' shape **do**  6: calculate the survival rate of each bin  7: **if** no difference in survival rate between adjacent bin **do**  8: merge(adjacent bin)  9: **end if**  10: **end while**  11: **end for**  12: **return** Adjustment bin  13: **end** **procedure** |
